# Supplementary material for: Regulation of Disease-Resistance Genes against CWMV Infection by NbHAG1-Mediated H3K36ac
Source: MDPI journal article supplement (doi:10.3390/ijms25052800), 2024-02-28
Supplement: s1 [file s1]

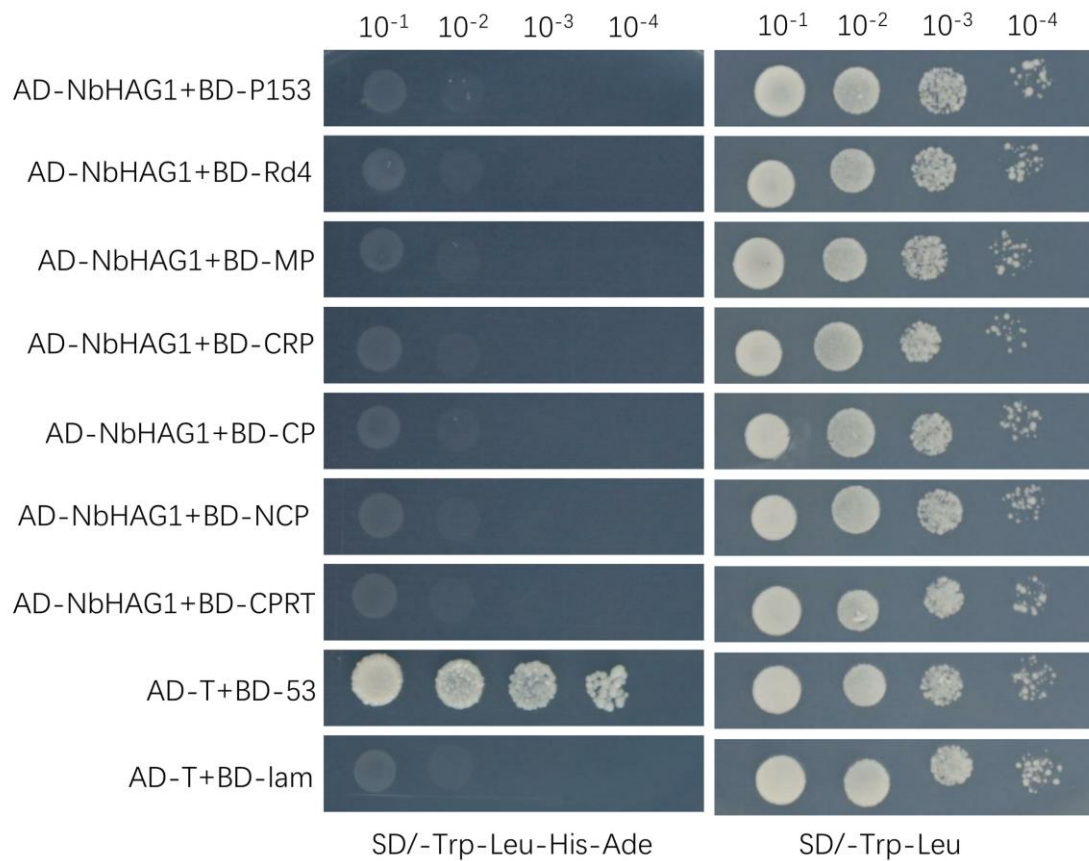

**Figure S2.** Yeast two hybrid assay showing that there is no direct interaction between NbHAG1 and the CWMV proteins: P153, Rd4, MP, CRP, CP, NCP and CP-RT. The transformed yeast cells were grown on SD/-Leu/-Trp medium and then on SD/-Trp/-Leu/-His/-Ade medium. Yeast cells co-expressing AD-T+BD-Lam or AD-T+BD-53 were used as controls.
