# Supplementary material for: Regulation of Disease-Resistance Genes against CWMV Infection by NbHAG1-Mediated H3K36ac
Source: MDPI journal article supplement (doi:10.3390/ijms25052800), 2024-02-28
Supplement: s1 [file s1]

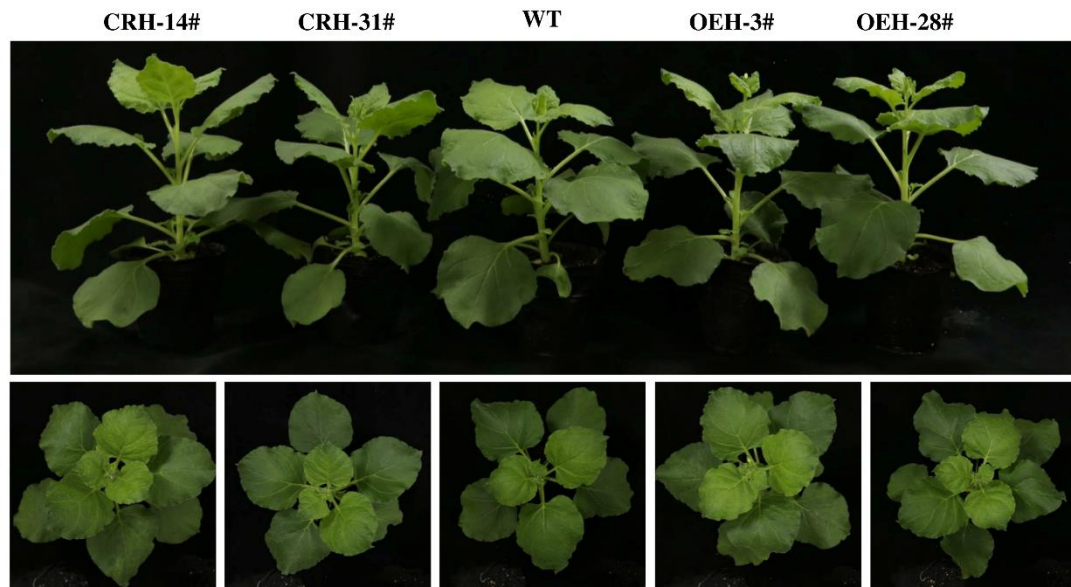

**Figure S1.** Growth phenotypes of the wild-type and NbHAG1 mutant plants after 30 days of growth in a growth chamber.
