# Supplementary material for: Regulation of Disease-Resistance Genes against CWMV Infection by NbHAG1-Mediated H3K36ac
Source: Int J Mol Sci. 2024 Feb 28;25(5):2800. doi: 10.3390/ijms25052800 (PMC10931728; doi:10.3390/ijms25052800)
Supplement: Supplementary file 1 [file ijms-25-02800-s001.zip]

Archive with 10 entries (10 files):
- ijms-2871725-supplementary/Figure S1. Growth phenotypes of the wild-type and NbHAG1 mutant plants.pdf
- ijms-2871725-supplementary/Figure S2. No direct interaction between NbHAG1 and CWMV proteins.pdf
- ijms-2871725-supplementary/Table S1. Sequences of A.thaliana, T. aestivum and N. benthamiana.xls
- ijms-2871725-supplementary/Table S2. LC-MS MS of CRISPR HAG1 VS Nb.xls
- ijms-2871725-supplementary/Table S3. LC-MS MS of OEHAG1 VS Nb.xls
- ijms-2871725-supplementary/Table S4. Raw data of DEGs Volcano plots between OEH vs Nb.xls
- ijms-2871725-supplementary/Table S5. Raw data from GO enrichment analysis of DEGs in OEH vs Nb.xls
- ijms-2871725-supplementary/Table S6. Raw data from KEGG enrichment analysis of DEGs in OEH vs Nb.xls
- ijms-2871725-supplementary/Table S7.  Disease resistance genes significantly up-regulated in OENbHAG1.xls
- ijms-2871725-supplementary/Table S8. Gene-specific primers used in this study.xls
