# Supplementary material for: Regulation of Disease-Resistance Genes against CWMV Infection by NbHAG1-Mediated H3K36ac
Source: Int J Mol Sci. 2024 Feb 28;25(5):2800. doi: 10.3390/ijms25052800 (PMC10931728; doi:10.3390/ijms25052800)
Supplement: Supplementary file 1 [file ijms-25-02800-s001.zip › ijms-2871725-supplementary/Table S1. Sequences of A.thaliana, T. aestivum and N. benthamiana.xls]

## Sheet: Sheet1
Table S1. Sequences of A.thaliana, T. aestivum and N. benthamiana.
>AT1G16710
MNVQAHMSGQRSGQVPNQGTVPQNNGNSQMQNLVGSNGAATAVTGAGAATGSGTGVRPSR
NIVGAMDHDIMKLRQYMQTLVFNMLQQRQPSPADAASKAKYMDVARRLEEGLFKMAVTKE
DYMNRSTLESRITSLIKGRQINNYNQRHANSSSVGTMIPTPGLSQTAGNPNLMVTSSVDA
TIVGNTNITSTALNTGNPLIAGGMHGGNMSNGYQHSSRNFSLGSGGSMTSMGAQRSTAQM
IPTPGFVNSVTNNNSGGFSAEPTIVPQSQQQQQRQHTGGQNSHMLSNHMAAGVRPDMQSK
PSGAANSSVNGDVGANEKIVDSGSSYTNASKKLQQGNFSLLSFCPDDLISGQHIESTFHI
SGEGYSTTNPDPFDGAITSAGTGTKAHNINTASFQPVSRVNSSLSHQQQFQQPPNRFQQQ
PNQIQQQQQQFLNQRKLKQQTPQQHRLISNDGLGKTQVDSDMVTKVKCEPGMENKSQAPQ
SQASERFQLSQLQNQYQNSGEDCQADAQLLPVESQSDICTSLPQNSQQIQQMMHPQNIGS
DSSNSFSNLAVGVKSESSPQGQWPSKSQENTLMSNAISSGKHIQEDFRQRITGMDEAQPN
NLTEGSVIGQNHTSTISESHNLQNSIGTTCRYGNVSHDPKFKNQQRWLLFLRHARSCKPP
GGRCQDQNCVTVQKLWSHMDNCADPQCLYPRCRHTKALIGHYKNCKDPRCPVCVPVKTYQ
QQANVRALARLKNESSAVGSVNRSVVSNDSLSANAGAVSGTPRCADTLDNLQPSLKRLKV
EQSFQPVVPKTESCKSSIVSTTEADLSQDAERKDHRPLKSETMEVKVEIPDNSVQAGFGI
KETKSEPFENVPKPKPVSEPGKHGLSGDSPKQENIKMKKEPGWPKKEPGCPKKEELVESP
ELTSKSRKPKIKGVSLTELFTPEQVREHIRGLRQWVGQSKAKAEKNQAMENSMSENSCQL
CAVEKLTFEPPPIYCTPCGARIKRNAMYYTVGGGETRHYFCIPCYNESRGDTILAEGTSM
PKAKLEKKKNDEEIEESWVQCDKCQAWQHQICALFNGRRNDGGQAEYTCPYCYVIDVEQN
ERKPLLQSAVLGAKDLPRTILSDHIEQRLFKRLKQERTERARVQGTSYDEIPTVESLVVR
VVSSVDKKLEVKSRFLEIFREDNFPTEFPYKSKVVLLFQKIEGVEVCLFGMYVQEFGSEC
SNPNQRRVYLSYLDSVKYFRPDIKSANGEALRTFVYHEILIGYLEYCKLRGFTSCYIWAC
PPLKGEDYILYCHPEIQKTPKSDKLREWYLAMLRKAAKEGIVAETTNLYDHFFLQTGECR
AKVTAARLPYFDGDYWPGAAEDIISQMSQEDDGRKGNKKGILKKPITKRALKASGQSDFS
GNASKDLLLMHKLGETIHPMKEDFIMVHLQHSCTHCCTLMVTGNRWVCSQCKDFQLCDGC
YEAEQKREDRERHPVNQKDKHNIFPVEIADIPTDTKDRDEILESEFFDTRQAFLSLCQGN
HYQYDTLRRAKHSSMMVLYHLHNPTAPAFVTTCNVCHLDIESGLGWRCEVCPDYDVCNAC
YKKEGCINHPHKLTTHPSLADQNAQNKEARQLRVLQLRKMLDLLVHASQCRSPVCLYPNC
RKVKGLFRHGLRCKVRASGGCVLCKKMWYLLQLHARACKESECDVPRCGDLKEHLRRLQQ
QSDSRRRAAVMEMMRQRAAEVAGTSG
>AT1G55970
MNNNKEVPQNSVAVSSSSSAPITVISPQQDANNFIKKRRTALRNRIYAIVRHKQKQHQIF
LDKKNQQQQQRVDDATQRALLEKQDQQCIAATRMIEEELLKSSRSFEEYFDLRTFDARVR
TILQQLGTMLSQRRAAAAAMNNGEAQCITSTRAVHTSISVSNSFQCGRSLVPINCTTATA
GAFSIGPDMQTHHSTGANHQMVEVNRPNMNQITCGISSPLITGFNGNCVPVSANIPMTSQ
DLFNATHFSTLPQPFLQPPPDQSHMHRYSMSNVASFGQSNPYPCGVVMSSGSMAVAQNSI
PWNNPNPMQGLDPTVTSYHSNLQPMQQTPLPKRQLHHPLWNTNFQSAPNNRDNLPQVSQQ
LSNHGSRQHRGQHSQNLYPGQLQNQDRLLPNLTQQAMALAAPVMHVPSKQVNEDCGQTSS
NTVLRWIPFMFHARHCKAKKDKCASKFCFQARKIVKHIDCCKVPNCKYRYCLGTRMWLDH
FKQCKSISCRTCVAVREYMEKNKYTIVPLRRAKCSSASSKCQPKKSSKSRQAYKKGGAEA
PSVDADLQRSIKRPKLHRPSQNITPETKSISVTGCGVVCKPHSLMNMQEKDGLQSLKVEA
MPMDIDVPGASEIPVTRELVKHVAEDTPKGNNCGGFAMVEKTSCLLAQGKSKCMNEMSAP
KEENVKQSVEVVDASKMEISSLVELFTPEQVKEHIRSLRQWVGQSKTKAEKNKAMGCSMS
VNSCQLCAVEWLVFEPVPIYCSPCGIRIKKNALHYSIAVGESRHYVCAPCYNEAREKLVF
LDGTSIPKTRLQKKKNDEQVPEGWVQCDKCEAWQHIICALFNSRRNHGESTKYTCPSCYI
QEVEQRERRPLPLSAVPGATSLPVTSLSKHLEERLFKKLKEERQERARLQGKTYEEVPGA
ESLTVRVVASVDKVLEVKERFLELFREENYPSEFPYKSKAIFLFQKIENVEVCLFGMFVQ
EFGTDSGPPNERRVYLSYLDSVKYFRPLFRVLLHEYMKLIIVTNLQIGYLDYCKKRGFTS
CYIWACPPLKGDDYILYCHPEIQKTPKTDKLREWYLAMLRKASKEDVVVECTNLYNHFFV
QSGECRANVTAARLPYFDGDYWPSAAEDLLRQMNQEDDGETKLHRKGLTKKVISKRALKA
VGQLDLSLNASKDRLMMQKLGETICPMKEDFIMVHLQHCCKHCTTLMVSGNRWVCNHCKN
FQICDKCYEVEQNRINIERHPINQKEKHALFPVAIKDVPTKIEDKDNNLESEFFHNRQAF
LNLCQGNNYQYETLRRAKHSSMMILYHLHNPTAPAFATVCTICQQEVENSQGWHCEVCPG
YDVCSACYSKDSINHSHKLTSRSSSTDSTVVQQNGQASQSYQVKLEKLKKLLVHAATCRS
TQCQYQGCRKSKMLFRHCIDCTTGDCPICKGLWSLLKLHARNCRDSKCTVPKCSGLRAIS
RRKQQQADKRRRAAVMEMMRERAAEATRTG
>AT1G67220
MAPPRKRTRDLMPKFLNTESFDEFNQRLNNLPAESNVTSDEDAQFLESRKCQSKRWRKEE
PLKLNLRSPWNVLCSPESISSAKFIVEKTCLIPVPSFEEAATNARRCLNTSSIPGSSGSA
SETNSGSDITKQDFKNDSPSDSKKVQGSSTSKSAKPKVIKVYSFVDLVTTTKKGNIQTEE
SSLNHEKKLGTVVDIVEPMKCDERSKEVQGSSTSKSAKPKVIKVYSFADVVTTTKKGNIQ
TEESSLNHEKKLGTVVDIIEPMKCDERSKEVQGSSTSKSAKLKVIKVYSFADVVTTTKKG
NIQTEESSLNHEKKLGTVVDIVEPMKCDERSKEVQGSSTSKSEKPKVIKVYSFADVVTTT
KKGNIQTEESSLNHEKKLGTVVDIVEPMKCDEGTKCEVTTTNKGKIHTEERSLNHEKKLG
TVVDIVEPMKCDEGSKCEVTTTNKGNTQTEERSLNHEKKLGIGVDIVEPMKCDEGTKCEV
TTTNKGKIQTEERSLNYEKKLGIGVDIVEPMKCDEENKCEVNADTFDVVIVEPMKCNKVT
KCEVNVDTTGVNIVEPMKCNEVTKCEVNVDTIGVDIVEPMKCNEESKCEVNADTMSLQKR
SKRAVSLVERFTEEEIKLHIMSLKKPSTQSAVEGMCDLKEEEESCQLCDDGTLLFPPQPL
YCLLCSRRIDDRSFYYTPGEEELSNAQHQICSPCHSRCKTKFPLCGVFIDKHKMLKRSNF
DNADTEEWVQCESCEKWQHQICGLYNKLKDEDKTAEYICPTCLLEECQSINNMALVDYTD
SGAKDLPETVLSYFLEQRLFKRLKEERYQTAKATGKSINDVPEPEGLTLRVVFSADRTLT
VNKQFASLLHKENFPSEFPYRSKVILLFQKVHGVDICIFALFVQEFGSECSQPNQRSTYI
FYLDSVKYFKPERVTFAGEALRTFVYHEVLIGYLEYCKLRGFTTSYIWACPPKIGQDYIM
YSHPKTQQTPDTKKLRKWYVSMLQKAAEQRVVMNVTNLYDRFFDSTEEYMTAARLPYFEG
SFWSNRAEIMIQDIEREGNNELQKKVKLLSRRKVKTMSYKTTGDVDVDDVKNILLMEKLE
KEVFPNKKDLMVVELNYSCTRCSKAVLSGLRWFCEKCKNLHLCESCYDAGQELPGEHIYK
RMDKEKHQLSKVQVNGVLFSTTEDNDIIQENDMFESRQAFLAFSQKHNYNFHTLRHAKHS
SMMILHHLHTSNKHHCSQNSSSLTCTACKKDVSTTIYFPCLLCPDYRACTGCYTKNRTLR
HLHIFPTLPSANRAPSRTVMVLEILNAISHALLCQHKTTKSCSYPKCHEVKALFTHNVQC
KIRKKGTRCNTCYKLWQTIRIHVYHCQDLNCPVPQCRDRKEVLIRKV
>AT1G79000
MNVQAHMSGQVSNQGTMSQQNGNSQMQNLVGGGSAPATGAGLGPSRVSPVDNDILKLRQA
MRIRIFNILQQKQPSPADEASKAKYMDVARRLEEGLFKIANTKEDYVNPSTLEPRLASLI
KGRQLNNYNQRHANSSSVGTMIPTPGLQHSGGNPNLMITSSGDATMAGSNNITTSAMNTG
NLLNSGGMLGGNLSNGYQHSSSNFGLGSGGNMSSMSSQRNTGQMMPTPGFVNSSTNNNSN
NGQSYLSVEASNNSGGFSTAPMMVPQTQQQQLRQDIGGQNSRMLQNHGSQMGVGLRPGMQ
QKLSNVSNSSINGGVGMNAKSVDSGTSYTNPIRNSQQAYDNLQRSGMQGDGYGTNNSDPF
GSGNLYGAVTSVGMMTNTQNANTASFQAVSRTSSSLSHQQQQFQQQPNRFQQQPNQFHQQ
QQQFLHQQQLKQQSQQQQRFISHDAFGQNNVASDMVTHVKHEPGMENPSESIHSQTPEQF
QLSQFQNQYQNNAEDRHAGSQILPVTSQSDMCTSVPQNSQQIQQMLHPHSMASDSVNGFS
NLSVGVKTESGMRGHWQSQSQEHTQMSNSMSNERHIQEDFRQRMSGTDEAQPNNMSGGSI
IGQNRVSTTSESLNPQNPTATTCRNGNGNRDPRFKNQQKWLLFLRHARHCKAPEGKCPDR
NCVTVQKLWKHMDSCAAPQCSYPRCLPTKTLINHHRSCKEPNCPVCIPVKAYLQQQANAR
SLARLKNETDAARSVNGGGISSDAVQTSAGAKSCTSPGADISGHLQPSLKRLKVEQSSQP
VDVETESCKSSVVSVTEAQSSQYAERKDHKHSDVRAPSKYFEVKAEVSDFSVQTRPGFKD
TKIGIAENIPKQRPVSQPDKQDLSDVSPMQETTKVEKEPESLKKENLAESTEHTSKSGKP
EIKGVSLTELFTPEQVREHIRGLRQWVGQSKAKAEKNQAMEHSMSENSCQLCAVEKLTFE
PPPIYCTPCGARIKRNAMYYTVGAGDTRHYFCIPCYNESRGDTILAEGTPMPKARLEKKK
NDEETEEWWVQCDKCEAWQHQICALFNGRRNDGGQAEYTCPYCFIAEVEQSKRKPLPQSA
VLGAKDLPRTILSDHIEQRLFKRLKQERTERARAQGKSYDEIPTAESLVIRVVSSVDKKL
EVKPRFLEIFREDSYPTEFAYKSKVVLLFQKIEGVEVCLFGMYVQEFGSECAFPNQRRVY
LSYLDSVKYFRPEVRSYNGEALRTFVYHEILIGYLEYCKLRGFTSCYIWACPPLKGEDYI
LYCHPEIQKTPKSDKLREWYLAMLRKASKEGIVAETINLYDHFFMQTGECRAKVTAARLP
YFDGDYWPGAAEDLIYQMSQEEDGRKGNKKGMLKKTITKRALKASGQTDLSGNASKDLLL
MHRLGETIHPMKEDFIMVHLQPSCTHCCILMVSGNRWVCSQCKHFQICDKCYEAEQRRED
RERHPVNFKDKHALYPVEIMDIPADTRDKDEILESEFFDTRQAFLSLCQGNHYQYDTLRR
AKHSSMMVLYHLHNPTAPAFVTTCNACHLDIETGQGWRCEVCPDYDVCNACFSRDGGVNH
PHKLTNHPSLADQNAQNKEARQLRVLQLRKMLDLLVHASQCRSAHCQYPNCRKVKGLFRH
GINCKVRASGGCVLCKKMWYLLQLHARACKESECHVPRCRDLKEHLRRLQQQSDSRRRAA
VMEMMRQRAAEVAGGSG
>AT3G12980
MAQGQNRTVLQSGQMHNSVVASASSVSSQPNMVNGISQDTLLLRQEMLNRTYAWLQQRQP
SKTDDASKAKLSEVAKRLESAMWRTATSKEDYLDFRSFDVRVESTLKQLLSQRRANPSSS
VSTMVQTPGVSHGWGQSYTATPMVDTSKFNSSNNLSDATTETGRLLPTNRMYRGTINNGR
QELSAVGQMIPTPGFDNSANADVYQSHRNEEYSGDGGKLLATGSDFGNPSQLQKQRPTGS
NDLMGYNLDHQLGGGFRSNIHQNTSGMTSIPLNAGVGMSGNNVHLANVPRSSEGVLSSTH
FSTFSQPSQQPVEQLQVSHVNRYSMSNSGTFVSGNLYGVQTSSGSIETAVDMNSMSLNSM
RRVDTSFGSQSGLQNNPLLKPHLRHQFENGNFQSSSNSKENLAQVSHRPLERQFNQQAHY
GQYHQQELLMNNDAYRQSQPASNLVSQVKNEPRVEYYNEAFQMQAINKVEPSKPQNQYKQ
NTVKDEYVGAQSAPVSSSQLKMSPSFPPQTHQTQQVSQWKDSSSLSAGVQPVSGLGQWHS
SSQNLTPISKNSNEEREHFGVRFHKQHEGTNNSSSVRESTNCLTVAPSGTLDVPHLPVGI
NVLSKQLNGDCGLSYKNQRRWLLFLLHVRKCNAAEDNCESKYCFTAKTLLKHINCCKAPA
CAYQYCHQTRQLIHHYKHCGDEACPVCVFVKNFKEKQKEKFTFLQRAEPSSASLNHGPKE
SFESMRTSSERDSEAPFVVDDLQPSPKRQKVEKPSQFAYPDTQGNPATISAGVSQAHFSM
GLQEKDRLPSDVCKPVRSNVPMNADSSDSSRRLVPVSRELEKPVCKDTHMGRHGVKSALD
GESLRLSKQEKPKRMNEISAPKEENAEQSLGVVSASNCGKSKIKGVSLIELFTPEQVEEH
IRGLRQWVGQSKTKAEKNKAMGLSMSENSCQLCAVERLAFEPTPIYCTPCGARVKRNAMH
YTVVAGESRHYVCIPCYNEARANTVSVDGTPVPKSRFEKKKNDEEVEESWVQCDKCQAWQ
HQICALFNGRRNHGQAEYTCPNCYIQEVEQGERKPVSQNVILGAKSLPASTLSNHLEQRL
FKKLKQERQERARLQGKSYEEVPGADSLVIRVVASVDKILEVKPRFLDIFREDNYSSEFP
YKSKAILLFQKIEGVEVCLFGMYVQEFGTDSASPNQRRVYLSYLDSVKYFRPDVRTVSGE
ALRTFVYHEILIGYLDYCKKRGFSSCYIWACPPLKGEDYILYCHPEIQKTPKTDKLREWY
LAMLKKASKEKVVVECTNFYDHFFVQSGECRAKVTAARLPYFDGDYWPGAAEDLIDQMSQ
EEDGKKSNRKLMPKKVISKRALKAVGQLDLSVNASKDLLLMHKLGEIILPMKEDFIMVHL
QHCCKHCCTLMVSGNRWVCNQCKNFQICDKCHEVEENRVEKEKHPVNQKEKHVLYPVAID
NIPTEIKDNDDILESEFFDTRQAFLSLCQGNHYQYDTLRRAKHSSMMILYHLHNPTVPAF
AMACAICQQELETAQGWRCEVCPDYDVCNACYSKGINHPHSIISRPSATDSVVQNTQTNQ
IQNAQLREVLLHVMTCCTAQCQYPRCRVIKGLIRHGLVCKTRGCIACKKMWSLFRLHSRN
CRDPQCKVPKCRELRAHFSRKQQQADSRRRAAVMEMVRQRAADTTASTPE
>AT1G32750
MAESNGKGSHNETSSDDDDEYEDNSRGFNLGFIFGNVDNSGDLDADYLDEDAKEHLSALA
DKLGSSLPDINLLAKSERTASDPAEQDYDRKAEDAVDYEDIDEEYDGPEVQVVSEEDHLL
PKKEYFSTAVALGSLKSRASVFDDEDYDEEEEQEEEQAPVEKSLETEKREPVVLKEDKAL
EYEEEASILDKEDHMDTEDVQEEEVDELLEGTLDDKGATPLPTLYVEDGMVILQFSEIFA
IHEPPQKRDRRENRYVTCRDKYKSMDISELVEDDEEVLLKSHGRIDTHVEQADLIQLDVP
FPIREGLQLVKASTIGGITPESREFTKLGRDSCIMGELLKQDFIDDNSSLCQSQLSMQVF
PLDQHEWERRIIWEHSPEISGNSGEIFEPGLEPEGMLVKGTNSETEQESLNVVNSRVQVQ
ADNNMFVPFSANLLESFGSRGSQSTNESTNKSRHHPQLLRLESQWDENHLSGNDEAGVKK
IKRLEKDALGRFSRLVLRERDLGDEAWLDSIIWDSEKELSRSKLIFDLQDEQMVFEIFDN
EESKNLQLHAGAMIVSRSSKSKDETFQEGCESNSGWQFNLSNDKFYMNGKSSQQLQANTN
KSSVHSLRVFHSVPAIKLQTMKSKLSNKDIANFHRPKALWYPHDNELAIKQQGKLPTRGS
MKIIVKSLGGKGSKLHVGIEESVSSLRAKASRKLDFKETEAVKMFYKGKELDDEKSLAAQ
NVQPNSLVHLIRTKVHLWPWAQKLPGENKSLRPPGAFKKKSDLSTKDGHVFLMEYCEERP
LMLSNAGMGANLCTYYQKSSPEDQRGNLLRNQSDTLGNVMILEPGDKSPFLGEIHAGCSQ
SSVETNMYKAPIFPQRLQSTDYLLVRSPKGKLSLRRIDKIVVVGQQEPRMEVMSPGSKNL
QTYLVNRMLVYVYREFFKRGGGEHPIAADELSFLFSNLTDAIIKKNMKIIACWKRDKNGQ
SYWTKKDSLLEPPESELKKLVAPEHVCSYESMLAGLYRLKHLGITRFTLPASISNALAQL
PDEAIALAAASHIERELQITPWNLSSNFVACTNQDRANIERLEITGVGDPSGRGLGFSYV
RAAPKAPAAAGHMKKKAAAGRGAPTVTGTDADLRRLSMEAAREVLIKFNVPDEIIAKQTR
WHRIAMIRKLSSEQAASGVKVDPTTIGKYARGQRMSFLQMQQQAREKCQEIWDRQLLSLS
AFDGDENESENEANSDLDSFAGDLENLLDAEEGGEGEESNISKNDKLDGVKGLKMRRRPS
QVETDEEIEDEATEYAELCRLLMQDEDQKKKKKKMKGVGEGMGSYPPPRPNIALQSGEPV
RKANAMDKKPIAIQPDASFLVNESTIKDNRNVDSIIKTPKGKQVKENSNSLGQLKKVKIL
NENLKVFKEKKSARENFVCGACGQHGHMRTNKHCPRYRENTESQPEGIDMDKSAGKPSSS
EPSGLPKLKPIKNSKAAPKSAMKTSVDEALKGDKLSSKTGGLPLKFRYGIPAGDLSDKPV
SEAPGSSEQAVVSDIDTGIKSTSKISKLKISSKAKPKESKGESERRSHSLMPTFSRERGE
SESHKPSVSGQPLSSTERNQAASSRHTISIPRPSLSMDTDQAESRRPHLVIRPPTEREQP
QKKLVIKRSKEMNDHDMSSLEESPRFESRKTKRMAELAGFQRQQSFRLSENSLERRPKED
RVWWEEEEISTGRHREVRARRDYDDMSVSEEPNEIAEIRRYEEVIRSEREEEERQKAKKK
KKKKKLQPEIVEGYLEDYPPRKNDRRLSERGRNVRSRYVSDFERDGAEYAPQPKRRKKGE
VGLANILERIVDTLRLKEEVSRLFLKPVSKKEAPDYLDIVENPMDLSTIRDKVRKIEYRN
REQFRHDVWQIKYNAHLYNDGRNPGIPPLADQLLEICDYLLDDYEDQLKEAEKGIDPND
>AT3G19040
MICRVDYGSNDEEYDGPELQVVTEEDHLLPKREYLSAAFALSGLNSRASVFDDEDYDEQG
GQEKEHVPVEKSFDSEEREPVVLKEEKPVKHEKEASILGNKNQMDTGDVQEELVVGLSEA
TLDEKRVTPLPTLYLEDDGMVILQFSEIFAIQEPQKKRQKREIRCITYRDKYISMDISEL
IEDDEEVLLKSHGRIDTHGKKTDQIQLDVPLPIRERSQLVKSGIVRDTTSESREFTKLGR
DSCIMGELLKQDLKDDNSSLCQSQLTMEVFPLDQQEWEHLILWEISPQFSANCCEGFKSG
LESAGIMVQVRASNSVTEQESLNVMNSGGQTQGDNNNMLEPFFVNPLESFGSRGSQSTNE
STNKSRHHPQLLRLESQWDEDHYRENGDAGRENLKQLNSDARGRLSGLALQDRDMWDESW
LDSIIWESDKDLSRSKLIFDLQDEQMIFEVPNNKERKYLQLHAGSRIVSRSSKSKDGSFQ
EGCGSNSGWQFNISNDKFYMNGKSAQKLQGNAKKSTVHSLRVFHSAPAIKLQTMKIKLSN
KERANFHRPKALWYPHDNELAIKQQKILPTQGSMTIVVKSLGGKGSLLTVGREESVSSLK
AKASRKLDFKETEAVKMFYMGKELEDEKSLAEQNVQPNSLVHLLRTKVHLWPWAQKLPGE
NKSLRPPGAFKKKSDLSNQDGHVFLMEYCEERPLMLSNAGMGANLCTYYQKSSPEDQHGN
LLRNQSDTLGSVIILEHGNKSPFLGEVHGGCSQSSVETNMYKAPVFPHRLQSTDYLLVRS
AKGKLSLRRINKIVAVGQQEPRMEIMSPASKNLHAYLVNRMMAYVYREFKHRDRIAADEL
SFSFSNISDATVRKYMQVCSDLERDANGKACWSKKRKFDKIPLGLNTLVAPEDVCSYESM
LAGLFRLKHLGITRFTLPASISTALAQLPDERIAAASHIARELQITPWNLSSSFVTCATQ
GRENIERLEITGVGDPSGRGLGFSYVRVAPKSSAASEHKKKKAAACRGVPTVTGTDADPR
RLSMEAAREVLLKFNVPDEIIAKQTQRHRTAMIRKISSEQAASGGKVGPTTVGMFSRSQR
MSFLQLQQQAREMCHEIWDRQRLSLSACDDDGNESENEANSDLDSFVGDLEDLLDAEDGG
EGEESNKSMNEKLDGVKGLKMRRWPSQVEKDEEIEDEAAEYVELCRLLMQDENDKKKKKL
KDVGEGIGSFPPPRSNFEPFIDKKYIATEPDASFLIVNESTVKHTKNVDKATSKSPKDKQ
VKEIGTPICQMKKILKENQKVFMGKKTARANFVCGACGQHGHMKTNKHCPKYRRNTESQP
ESMDMKKSTGKPSSSDLSGEVWLTPIDNKKPAPKSATKISVNEATKVGDSTSKTPGSSDV
AAVSEIDSGTKLTSRKLKISSKAKPKASKVESDSPFHSLMPAYSRERGESELHNPSVSGQ
LLPSTETDQAASSRYTTSVPQPSLSIDKDQAESCRPHRVIWPPTGKEHSQKKLVIKRLKE
ITDHDSGSLEETPQFESRKTKRMAELADFQRQQRLRLSENFLDWGPKDDRKWRKEQDIST
ELHREGKVRRAYDDSTVSEERSEIAESRRYREVIRSEREEEKRRKAKQKKKLQRGILENY
PPRRNDGISSESGQNINSLCVSDFERNRTEYAPQPKRRKKGQVGLANILESIVDTLRVKE
VNVSYLFLKPVTKKEAPNYLEIVKCPMDLSTIRDKVRRMEYRDRQQFRHDVWQIKFNAHL
YNDGRNLSIPPLADELLVKCDRLLDEYRDELKEAEKGIVDSSDSLR
>AT3G54610
MDSHSSHLNAANRSRSSQTPSPSHSASASVTSSLHKRKLAATTAANAAASEDHAPPSSSF
PPSSFSADTRDGALTSNDELESISARGADTDSDPDESEDIVVDDDEDEFAPEQDQDSSIR
TFTAARLDSSSGVNGSSRNTKLKTESSTVKLESSDGGKDGGSSVVGTGVSGTVGGSSISG
LVPKDESVKVLAENFQTSGAYIAREEALKREEQAGRLKFVCYSNDSIDEHMMCLIGLKNI
FARQLPNMPKEYIVRLLMDRKHKSVMVLRGNLVVGGITYRPYHSQKFGEIAFCAITADEQ
VKGYGTRLMNHLKQHARDVDGLTHFLTYADNNAVGYFVKQGFTKEIYLEKDVWHGFIKDY
DGGLLMECKIDPKLPYTDLSSMIRQQRKAIDERIRELSNCQNVYPKIEFLKNEAGIPRKI
IKVEEIRGLREAGWTPDQWGHTRFKLFNGSADMVTNQKQLNALMRALLKTMQDHADAWPF
KEPVDSRDVPDYYDIIKDPIDLKVIAKRVESEQYYVTLDMFVADARRMFNNCRTYNSPDT
IYYKCATRLETHFHSKVQAGLQSGAKSQ
>AT5G50320
MATAVVMNGELKKQPRPGKGGYQGRGLTEEEARVRAISEIVSTMIERSHRNENVDLNAIK
TAACRKYGLARAPKLVEMIAALPDSERETLLPKLRAKPVRTASGIAVVAVMSKPHRCPHI
ATTGNICVYCPGGPDSDFEYSTQSYTGYEPTSMRAIRARYNPYVQARSRIDQLKRLGHSV
DKVEFILMGGTFMSLPAEYRDFFIRNLHDALSGHTSANVEEAVAYSEHSATKCIGMTIET
RPDYCLGPHLRQMLIYGCTRLEIGVQSTYEDVARDTNRGHTVAAVADCFCLAKDAGFKVV
AHMMPDLPNVGVERDMESFKEFFESPSFRADGLKIYPTLVIRGTGLYELWKTGRYRNYPP
EQLVDIVARILSMVPPWTRVYRVQRDIPMPLVTSGVEKGNLRELALARMDDLGLKCRDVR
TREAGIQDIHHKIKPEQVELVRRDYTANEGWETFLSYEDTRQDILVGLLRLRKCGKNVTC
PELMGKCSVVRELHVYGTAVPVHGRDADKLQHQGYGTLLMEEAERIARREHRSNKIGVIS
GVGTRHYYRKLGYELEGPYMVKHLL
>AT5G56740
MVQKQQASAGPGTEPKKRRRVGFSPADTGVEANECIKIYLVSSKEEVDSSDISSVKPVDL
NDFFDGDGKIYGYQGLKINVWINSISLHSYADITYQSTINGDKGITDLKSALQNIFAETI
VDTKDEFLQTFSTQRDFIRNMVSNGEVMHAGATDGSSKNAEVVPSDPQVIRMEIGSPNAG
LLYSRLVPLVLLFVDGSNPIDVTDPDWHLYLLIQKKEEKEDPLYRIVGFTAIYKFYRYPD
RLRMRLSQILVLPSFQGKGLGSYLMEVVNNVAITENVYDLTVEEPSEKFQHIRTCIDINR
LRSFDPIKPDIDSAVQTLTKGKLSKKAQIPRFTPPLNAIEKVRESLKINKKQFLKCWEIL
IYLALDPIDKYMEDYTSVITNHVRTDILGKDIETPKKQVVDVPSSFEPEASFVVFKSVNG
EEANTNVQVDENKPDQEQQLKQLVEERIREIKLVAEKVSKSGQTLKV
>AT5G09740
MGSSANTETNGNAPPPSSNQKPPATNGVDGSHPPPPPLTPDQAIIESDPSKKRKMGMLPL
EVGTRVMCRWRDGKHHPVKVIERRRIHNGGQNDYEYYVHYTEFNRRLDEWTQLDQLDLDS
VECAVDEKVEDKVTSLKMTRHQKRKIDETHIEGHEELDAASLREHEEFTKVKNISTIELG
KYEIETWYFSPFPPEYNDCVKLFFCEFCLNFMKRKEQLQRHMRKCDLKHPPGDEIYRSGT
LSMFEVDGKKNKVYAQNLCYLAKLFLDHKTLYYDVDLFLFYVLCECDDRGCHMVGYFSKE
KHSEEAYNLACILTLPSYQRKGYGKFLIAFSYELSKKEGKVGTPERPLSDLGLLSYRGYW
TRVLLEILKKHKGNISIKELSDVTAIKAEDILSTLQSLELIQYRKGQHVICADPKVLDRH
>AT5G64610
MGSSADTETAMIIATPASNHNNPATNGGDANQNHTSGAILALTNSESDASKKRRMGVLPL
EVGTRVMCQWRDGKYHPVKVIERRKNYNGGHNDYEYYVHYTEFNRRLDEWIKLEQLDLDS
VECALDEKVEDKVTSLKMTRHQKRKIDETHVEGHEELDAASLREHEEFTKVKNIATIELG
KYEIETWYFSPFPPEYNDCVKLFFCEFCLSFMKRKEQLQRHMRKCDLKHPPGDEIYRSST
LSMFEVDGKKNKVYAQNLCYLAKLFLDHKTLYYDVDLFLFYILCECDDRGCHMVGYFSKE
KHSEEAYNLACILTLPPYQRKGYGKFLIAFSYELSKKEGKVGTPERPLSDLGLVSYRGYW
TRILLDILKKHKGNISIKELSDMTAIKAEDILSTLQSLELIQYRKGQHVICADPKVLDRH
LKAAGRGGLDVDVSKMIWTPYKEQS
>TraesCS2A02G039500.1
MMTQTLQGIQQQYAPSGFTVQKPRTQTAAQVLQLDNMDSDTSPVRLVIKHRIANYLQRRG
DFYNFDTRYLLAVSKSIDEQLYKDAESKIQYMDFETLEVRVNALLSCGSFGNSIYAWASS
AALPTSYPGQLGIEVPDSSIQHVFYPQGFAPTNHHEVAADFAHSSADNIKRSPESLANTT
AAPCMSSLPKYSSCLAGDFSGGAPTGHTEDHFPGDARQVGSPQPSTSGSSSSVSGMCDRT
TNFTNNNRYSTGQVSSSLQYRECKEMLYTWSHPIEQSDQSNITAGGHDLYSGNCVTVREA
VGRAEQTSNSTVSKPNSPASDESSGKHHPAKRLKVNYPIPVHADETEFPKEQQPAANGPH
ASSETVKSETTVLSMKSPSGCSLQDSNASNTMENFRLQETAVQAEEGLCDENGDIEMKDS
KLSSVDQTSLVASLTTRKKRGGSILYPLTAEELRDHMRSLGQHIFPNKAITEEDQSGLPD
QNTCNLCGMERLLFEPPPRFCALCFKVINSTGSYYVPVENGSDKTSICAKCHHHVSNAKA
KYERRSNYAETDAESEWWVACDKCKAWQHQICALFNPKVMEEGVEYTCAKCLLKEKDSGD
INLLESSAVLGALELPRTKLSDHIEQRLSVRLEHERLQRARASGKSVEEVPEVEGLTVRV
VSSAARVLQVLPRFRDFFKQGNYPGEFPYKSKAILLFQKNEGVDVCLFAMYVQEYGSASP
SPNQRHVYLAYIDSVKYFRPEIKSASGEALRTFVYHEILIGYLDYCKKQGFVSCSIWACP
STKRDDYVLYCHPTAQKMPRSDKLRSWYQNLIKKAVREGVVVERNTLYDFFLQPTGECKA
VISAACLPYCENDFWPGEAEKLLEKKDDDTSQKNDIQAGRALRVAKRDDRKGNPEDILLV
HKLGEKMRTMKEDFIMLCLQQFCKHCHQPILSGKSWMCTCCKNFHLCDQCHAEELSAPQK
NRHPAATKQKHAFQRIEEEPLPETDDGDPTMESKYFDSRTDFLKHCQDNQYQFDTLRRAK
HSTMMILYNLHDSACSACHRAMDQRFAWRCLVCAGCKFCDSCYKQDGENLHIHKLKQADN
QQLLPNYTLQDYLESLVHASKCFHDPHNCSFKLCVTMKKLFYHGVRCAIRNQGGCRNCVF
MWRLLLTHSKQCDHGDCSVPRCRDLKVFMGKAKMVTAGPCCAMEC
>TraesCS2B02G052300.4
MMTQTLQGIQQQYAPSGFTVQKPRTQTAAQVLQLDNMDSDTSPVRLVIKHKIANYLQRRG
DFYNLDTRYLVAVSKSIDEQLYKDAESKIQYMDFETLEVRVNALLSCGSFGNSIYAWASS
AALPTSYPGQLGIEVPDSSIQHVFYPQGFAPTNHHEVAADFAHSSADNIKRTPESLANTT
AAPCMSSLPKYSSCLAGDFSGGAPTGHTEDHFPGDAHQVDSPQPSTSGSSSSVSGMCDRI
ANFTNNNRYSTGQVSSSLQYRECKEMLYTWSHPIEQSDQSNITAGGHDLYSGNCVTVREV
VGRAEQTSNSTVSKPNSPASDESSGKHHPAKRLKVNYPFPVHADETEFPKEQQPAANGPH
ASSGTVKSETTVLSMKSPSGCSLQDSNASNTMENFRLQETAVQAEEGLCYENGDIEMKDS
KLSSVDQTSLVASLTTRKKRGGSILYPLTAEELRDHMRSLGQHIFPNKAITEEDQSGLPD
QNTCNLCGMERLLFEPPPRFCALCFKVINSTGSYYVPVENGSDKNSICAKCHHHVSNAKA
KYQRRSNYAETDAESEWWVACDKCKAWQHQICALFNPKVMEEGVEYTCAKCLLKEKDSGD
INLLESSAVLGALELPRTKLSDHIEQRLSVRLEHERLQRARASGKSVEEVPEVEGLTVRV
VSSAARVLQVLPRFRDFFKQGNYPGEFPYKSKAILLFQKNEGVDVCLFAMYVQEYGSASP
SPNQRHVYLAYIDSVKYFRPEIKSASGEALRTFVYHEILIGYLDYCKKQGFVSCSIWACP
STKRDDYVLYCHPTAQKMPRSDKLRSWYQNLIKKAVKEGVVVERNTLYDFFLQPTSECKA
IISAACLPYCENDFWPGEAEKLLVEKKDDNTSQKNNIQAGRALRVAKRDDRKGNPEDILL
VHKLGEKMRTMKEDFIMLCLQQFCKHCHQPILSGKSWMCTCCKNFHLCDQCHAEELSAPQ
KDRHPAATKQKHAFQRIEEEPLPETDDGDPTMESKYFDSRTDFLKHCQDNQYQFDTLRRA
KHSTMMILYNLHDSACSACHRAMDQRFAWRCLVCTGCKFCDSCYKQDGENLHIHKLKQTD
NQQQLPNYTLQQDYLESLVHASKCFHDPHNCSFKLCVTMKKLFYHGVRCGIRNQGGCRNC
VFMWRLLLTHSKQCDHEDCSVPRCRDLKVFMGKAKMLPARPCAVEC
>TraesCS2D02G038100.1
MMTQTLQGIQQQYAPSGFTVQKPRTQTAAQVLQLDNMDSDTSPVRLVIKHRIANYLQGRG
DFYNLDTRYLLAVSKSIDEQLYKDAESKIQYMDFETLEVRVNALLSCGSFGNSIYAWASS
AALPTSYPGQLGIEVPDSSIQHVFYPQGFAPTNHHEVAADFAHSSADNIKRSPESLANTT
AAPCMSSLPKYSSCLAGDFSGGAPTGHTEDHFPGDAHQVDSPQPSTSGSSSSVSGMCDRT
ANFTNNNRYSTGLVSSSLQYRECKEMLYTWSHPIEQSDQSNITAGGHDLYSGNCVTVREV
VGRAEQTSNSTVSKPNSPASDESSGKHHPAKRLKVNYPFPVHADETEFPKEQQPAANGPH
ASSETVKSETTVLSMKSPSGCSLQDSNASNTMENFRLQETAVQADEGLCYENGDIEMKDS
KLSSVDQTSLVASLTTRKKRGGSILYPLTAEELRDHMRSLGQHIFPNKAITEEDQSGLPD
QNTCNLCGMERLLFEPPPRFCALCFKVINSTGSYYVPVENGSDKTSICAKCHHHVSNAKA
KYERRSNYAETDAESEWWVACDKCKAWQHQICALFNPKVMEEGVEYTCAKCLLKEKDSGD
IDLLESSAVLGALELPRTKLSNHIEQRLSVRLEHERLQRARASGKSVEEVPEVEGLTVRV
VSSAARVLQVLPRFRDFFKQGNYPGEFPYKSKAILLFQKNEGVDVCLFAMYVQEYGSASP
SPNQRHVYLAYIDSVKYFRPEIKSASGEALRTFVYHEILIGYLDYCKKQGFVSCSIWACP
STKRDDYVLYCHPTAQKMPRSDKLRSWYQNLIKKAVREGVVVERNTLYDFFLQPTSECKA
VTSAACLPYCENDFWPGEAEKLLEKKDDDTSQKNDIQAGRALRVAKRDDRKGNPEDILLV
HKLGEKMRTMKEDFIMLCLQQFCKHCHQPILSGKSWMCTCCKNFHLCDQCHAEELSAPQK
NRHPAATKQKHAFQRIEEEPLPETDDGDPTMESKYFDSRTDFLKHCQDNQYQFDTLRRAK
HSTMMILYNLHDSACSACHRAMDQRFAWRCLVCAGCKFCDSCYKQDGENLHIHKLKQADN
RQLLPNYTLQQDYLESLVHASKCFHNPHNCSFKLCVTMKKLFYHGVRCAIRNQGGCRNCV
FMWGLLLTHSKQCDHGDCSVPRCRDLKEFMGKAKMVTAGPCAMEC
>TraesCS3A02G524800.1
MMAQALQGIQQQYAPSGLPVQKRYTKETAAQILQLDNMDSDTSPVRLVIKHKIVTYLKGR
EQFYNLHPRYLLAVSKSIDEQLYKDAESKIDYMDFETLEVRLNALLSRGSFGNSRYALAS
SASLPTSHSEQLGIEVTDSSIQNGRAVPGSVNPPLPARDISHNVLYSQVGFAPTSHHEAA
ASFVHSSADKIKQGPESLANATAAPCVSLLPKCSPCIAGDFGGGVPTGHTKYHFPGDVHQ
VDSQQPSTSGSSSSVSAMCDRTANSTNNNRYSAGQVSSSMQYRECGKVLYTRSHPVEESD
QSNITAGCHDLYIHDQSKIRTDIKRECGLEGCMQMDETCFCREKCSTLNTKFSYDQCSYI
AADSGNCVSIREAVKGAEQTSNSTVSKPTSPTSDESSGKHHPAKRLRINSPRPVHADKTK
FPKELQPAANGTYVSSETVQSETTALPTKSPSGCSLLDSNASNNMEIIRLPETAMQAEEG
LCHGNGDIEMKELSCYGNGDIEMKEGLCYGNGDIEMKDSKLGSVDETSLAASLTAMKKRG
GSILYALSAEELRDHMKSLNQHICLSQVMTEEHPSGLPDQNTCNLCGMERILFEPPPRFC
ALCFKIINSTGSYYVHVENGIDKASICAKCHHLSTAKFKYEKRSNYAETDAEAEWWVECD
KCKAWQHQICALFNPKIADKEVEYTCAKCLLKERDSGDIILPESATVLGALELPRTKLSD
HIEQRLSVRLEHERLQRARASGKDIEEVPGVEGLTVRVVSSAARVLQVQPRFRDFFKDGK
YPGEFPYKSKAILLFQKNEGVDVCLFAMYVQEYGSDSPLPNRRHVYLAYIDSVKYFRPET
KSASGEALRTFVYHEILIGYLDYCKKIGFVSCSIWACPSTKRDDYVLYCHPTSQKMPKSD
KLRSWYQNLIKKAVKDGVVVERNTLYDFFLQPTSDRKASISAACLPYCENDFWPGEAERL
LEKKDDSTSQKKEPQVGRLMRVAKRDDRKGNLEDNLEDILLVHKLGEKMRTMKEDFIMLC
LQRFCKHCHQPIVSGKSWVCTCCKNFHLCDQCHAEELTAPLKDRHPATTKQKHAFQRIEE
EPLPETDDGDPTMESKYFDSRIDFLKHCQDNQYQFDTLRRAKHSTMMILYHLHDSACSAC
HQAMDQRFAWRCLVCAGCNFCDSCYKQDGEKLHIHKLKQTEQQVLPNYTLQDYLEALVHA
SKCFCAARTCAFKLCFTMKKLFFHGVRCDIRNRGGCRKCIFMWKLLLTHAKHCGDGACSV
PRCRDIKAFFMHKTKMIAGPPCAIEC
>TraesCS3D02G530000.2
MMAQALQGIQQQYAPSGLPVQKRYTHETAVQILQLDNMDSDTSPVRLVIKHKIVTYLKGR
EQFYNLHPRYLLAVSKSIDEQLYKDAESKIDYMDFETLEVRLNALLSRGSFGNSRYALAS
SASLPTSHSEQPGIEVTDSSIQNGRAVPGSVNPPLPARDISHNVLYSQVGFAPTSHHEAA
ASFVHSSADKIKQGPESLANATAGPCVSSLPKCSPCIAGDFSGGVRTGHTKYHFPGDVHQ
VDSQQPSTSGSSSSVSAMCDRTANSTNNNRYSAGQVSSSLQYRECGKVLYTRSHPVEESN
QSNITAGCHDLYIHDQSKIRTDIKRECGLEGCMQMDETCFCREKCSTLNTKFSYDQCSYI
AADSDNCISIREAVKGAEQTSNSTVSKPTSPTSDESSGKHHPAKRLRINSPRPVHADKTK
FPKELQPAANGTYVSSETVQSETTALPTKSPSGCSLLDSNASNNMEIIRLPETAMQAEEG
LCHRNGDIEMKELSCYGNGDIEMKEGLCYGNGDIEMKDSKLSSVDQTSLVASFTATKKRG
GSILYALTAEELRDHMKSLNQHICPSQVMTEEHPSGLPDQNTCNLCGMERILFEPPPRFC
ALCFKIINSTGSYYVHVENGIDKASICAKCHHLSTAKFKYQKRSNYAETDAEAEWWVECD
KCKAWQHQICALFNPKVADEEVEYTCAKCLLKERDSGDIILPESPTVLGALELPRTKLSD
HIEQRLSVRLEHERLQRARASGKDIEEVPGVEGLTVRVVSSAARVLQVQPRFRDFFKDGK
YPGEFPYKSKAILLFQKNEGVDVCLFAMYVQEYGSDSPLPNRRHVYLAYIDSVKYFRPEI
KSASGEALRTFVYHEILIGYLDYCKKIGFVSCSIWACPSTKRDDYVLYCHPTSQKMPKSD
KLRSWYQNLIKKAVKDGVVVERNTLYDFFLQPTSDRKASISAACLPYCENDFWPGEAERL
LEKKDDNTSQKKEPQVGRLMRVAKRDDRKGNLEDNLEDILLVHKLGEKMRTMKEDFIMLC
LQRFCKHCQQPIVSGKSWVCTCCKNFHLCDQCHAEELSAPLKDRHPATTKQKHAFQRIEE
EPLPETDDGDPTMESKYFDSRIDFLKHCQDNQYQFDTLRRAKHSTMMILYHLHDSACSAC
HQAMDQRFAWRCLVCAGCNFCDSCYKQDGEKLHIHKLKQTEQQVLPNYTLQDYLEALVHA
SKCFCAARSCAFKLCFTMKKLFFHGVRCDIRNRGGCRKCIFMWKLLLTHAKHCGDGGCSV
PRCRDIKAFFMDKTKMIAGPPCAVEC
>TraesCS6A02G107300.1
MNVGQAAHLSGQMSGQGAQMNQVVGGGSGVVGADGMPLPQHQQMQDGVGLVAPGVDQQFA
LMRSNMRDKIYEYIGRKQTSADWRRRLPELAKRLEEILFRKFPSRNEYYNMMRQPVEPQL
QFAIKALSAQNQLNQQNQQMSRQMASSSGYSTMIPTPGITQGASGNSRMSYGTDNMGLSS
SGAGMVPQNANMGTSMPGTMSNGYQHLTTSAPLNSTTSSVPSTMGPVGIQRQVTHMIPTP
GFSNQQNVPTNSDYSNGTGYFNGESAMTPHMQQQKQFQSNQSSHQIHHIGGHSNSGIHSS
MLENSSAFGLSDGHVNGGMGLHGSNTQITNRNAAPEGYMNISSFGSSPRPLQQQFNQHPT
QRISTSVDMGGSGSFYGTGSSALATANNQNMGAANLQSRSRMNSMLLSNQLNMQSIQGQP
QIKTEVLDQSEKLNFQPSQLSHEQLLRQQLSMQQHQVQPSSQFVQNQYHLNQQIPNSQHQ
QAMLRSNSFKQSQLNSSHSMQVSEQGTLPHTELTSSQATEPPALPNFQGQYQQRSAHDNV
KGAQVFGHLSGSQNFSASGSHDSQPLLHPNQQLDVSSNDVSYVLKGTQTEQMQQHQWRPQ
TMEKVPISSNLSLEKQIQDDFCQRTMAQDGAQQPFSSDWRVSGCTVTSVDPALPKLPAGG
LEQPTGNINYLRQMRWLLLLFHAKGCSSPLGSCKLPRCVQLQDFVKHLDNCQRKDCPQKK
CSKSRMLIEHYKTCVDEQCPVCSNVKKFLRLSAEHASKQKVPEPRKVAQQNMTQRIMNGV
DSDIMDIDPVSVESFDGQPSVPKRLKMQPASPNVPEHEILRASNPQVNPGFVLQESHPEL
LEQNKKTAYMKRELDVKADMRPLQKPVKMGYGADGSVPTARHNVIPTVSNEMKSHVKQEI
LPVDKGTSENVHEVKNETNDSTEATALKSGKPKIKGVSLTELFTPEQINAHIESLRLWVG
QSKAKAEKNQLLVSSENENSCQLCKVEKLTFEPPPIYCSPCGARIKRNAPYYTVGSGDTR
HFFCIPCYNESRGDTIEVEGQNFLKARFEKKRNDEETEEWWVQCDKCECWQHQICALFNG
RRNDGGQAEYTCPNCYSNEVKCGLRMPLPQSAVLGASDLPRTVLSDHIEERLFKRLKWER
QNRANNLNCSVDEVAGAEGLVVRVVSSVDKKVEVKPRFLEIFQEDNYPTEFPYKSKAVLL
FQKIEGVEVCLFGMYVQEFGADCAYPNQRRVYLSYLDSVKYFRPEIKAATGEALRTFVYH
EILIGYLEYCKQRGFTSCYIWACPPLKGEDYILYCHPEIQKTPKSDKLREWYLAMLRKAT
KEEIVVELTNLYDHFFITMGECKAKVTASRLPYFDGDYWPGAAEDMINQLRQEEDDRKLQ
KKSKTKKIITKRALKAAGHTDLSGNASKDAMLMQKLGETIYPMKEDFIMVHLQYSCSHCC
LLMSSGKRWVCHQCRSFYICDKCYSAEQQLEDRERHPSNSRDTHKLHPVDIVGVPEETKD
RDDILESEFFDTRQAFLSLCQGNHYQYDTLRRAKHSSMMVLYHLHNPTAPAFVTTCNVCS
HDIETGQGWRCEICPDFDVCNGCYQKGAVNHPHKLTNHPSVADRDAQNKEARQMRVQQLR
KMLDLLVHASTCRSGSCQYPNCRKVKGLFRHGMQCKTRASGGCALCKKMWYMLQLHARAC
RDSGCSVPRCRDLKEHLRRLQQQSDSRRRAAVNEMMRQRAAEVATT
>TraesCS6B02G135800.1
MNVGQAAHLSGQMSGQGAQMNQVVGGGSGVVGADGMPLPQHQQMQDGVGLVAPGVDQQFA
LMRSNMRDKIYEYIGRKQTSADWRRRLPELAKRLEEILFRKFPSRNEYYNMMRQPVEPQL
QFAIKTLSAQNQLNQQNQQMSRQMASSSGYSTMIPTPGITQGASGNSRMSYGTDNMGLSS
SGAGMVPQNANMGTSMPGAMSNGYQHLTTSAPLNSTTNSVPSTMGPVGIQRQVTHMIPTP
GFSNQQNVPTNSDYSNGTGYFNGESAMTPHMQQQKQFQSNQSSHQIQHIGGHSNSGIHSS
MLENSSAFGLSDGHVNGGMGLHGSNTQITNRNAAPEGYMNISSFGSSPRPLQQQFNQHPT
QRISTSVDMGGSGSFYGTGSSALATANNQNMGAANLQSRSRMNSMLLSNQLNMQSIQGQP
QIKTEVLDQSEKLNFQPSQLSHEQLLRQQLSMQQHQVQPSSQFVQNQYHLNQQIPNSQHQ
QAMLRSNSFKQSQLNSSHSMQVSEQGTLPHTELTSSQAIEPPALPNFQGQYQQRSAHDNV
KGAQVFGHLSGSQNFSASGSHDSQPLLHPNQQLDVSSNDVSYVLKGTQTEQMQQHQWRPQ
TMEKVPISSNLSLEKQIQDDFCQRTMAQDGAQQPFSSDWRVSGCTVTSVDPALPKLPAGG
LEQPTGNINYLRQMRWLLLLFHAKGCSSPLGSCKLPRCVQLQDFVKHLDNCQRKDCPQKK
CSKSRMLIEHYKTCVDEQCPVCSNVKKFLRLSAEHASKQKVPEPRKVAQQNMTQRIMNGV
DSDIMDIDPVSVESFDGQPSVPKRLKMQPASPNVPEHEILRASNPQVNPGFVLQESHPEL
LEQNKKTAYMKRELDVKADMRPLQKPVKMGYGADGNVPTARHNVIPTVSNEMKSHVKQEI
LPVDKGTSENVHEVKNETNDSTEATALKSGKPKIKGVSLTELFTPEQINAHIESLRLWVG
QSKAKAEKNQLLVSSENENSCQLCKVEKLTFEPPPIYCSPCGARIKRNAPYYTVGSGDTR
HFFCIPCYNESRGDTIEVEGQNFLKARFEKKRNDEETEEWWVQCDKCECWQHQICALFNG
RRNDGGQAEYTCPNCYSNEVKCGLRMPLPQSAVLGASDLPRTVLSDHIEERLFKRLKWER
QNRANSSNCSVDEVAGAEGLVVRVVSSVDKKVEVKPRFLEIFQEDNYPTEFPYKSKAVLL
FQKIEGVEVCLFGMYVQEFGADCAYPNQRRVYLSYLDSVKYFRPEIKAATGEALRTFVYH
EILIGYLEYCKQRGFTSCYIWACPPLKGEDYILYCHPEIQKTPKSDKLREWYLAMLRKAT
KEEIVVELTNLYDHFFITMGECKAKVTASRLPYFDGDYWPGAAEDMINQLRQEEDDRKLQ
KKSKTKKIITKRALKAAGHTDLSGNASKDAMLMQKLGETIYPMKEDFIMVHLQYSCSHCC
ILMSSGKRWVCHQCRSFYICDKCYSAEQHLEDRERHPSNSRDTHKLHPVDIVGVPEETKD
RDDILESEFFDTRQAFLSLCQGNHYQYDTLRRAKHSSMMVLYHLHNPTAPAFVTTCNVCS
HDIETGQGWRCEICPDFDVCNGCYQKGAVNHPHKLTNHPSVADRDAQNKEARQMRVQQLR
KMLDLLVHASTCRSGSCQYPNCRKVKGLFRHGMQCKTRASGGCALCKKMWYMLQLHARAC
RDSGCSVXXYRDLKEHLRRLQQQSDSRRRAAVNEMMRQRAAEVATT
>TraesCS6B02G367300.1
MQHQICALFNGINYDVKQAYTCLYCYIDEVKHGLHVPSPQSAVLGASDLPRTVLSDHIEE
RLFKRLKLERQARASQSGCSFDEVAGADGLVVRVVSSVDKKVGVKPRFLETFQEDNYPTE
FPYKSKAVLLFQKIDGVEVCLFGMYVQEFGAECAFPNQRRVYLSYLDSVKYFRPGIKAAT
GEALRTFVYHEILIGYLEYCKQRGFTSCYIWARPPLEGDNIFYCNPTIQTTRTSDILREW
CLAMIRKATKEEIVVELTNLYDHFFITTGECKAKVTASRLTYFDGDYWPGAAEGMVNQLH
QEEDDQKLQKKGNAKKIIRKRALEAAGHTDLSGNASEDDMLMQKLGETIYPMKEDFIMVH
LQYSCSHCRSFMSSGKRWACHQCRSFYICDKCYSAEQELEERERHPSNSRETHELHPVDI
VGVPEETKDGDGIIENKFFDTRHAFLSLCQENHYQFDTLRRARHSSMMVLYHLHNPTVKY
NGAV
>TraesCS6D02G095400.1
MNVGQAAHLSGQMSGQGAQMNQVVGGGSGVVGADGMPLPQHQHQQMQDGVGLVAPGVDQQ
FALMRSNMRDKIYEYIGRKQTSADWRRRLPELAKRLEEILFRKFPSRNEYYNMMRQPVGP
QLQFAIKTLSAQNQLNQQNQQMSRQMASSSGYSTMIPTPGITQGASGNSRMSYGTDNMGL
SSSGAGMVPQNANMGTSMPGTMSNGYQHLTTSAPLNSTTNSVPSTMGPVGIQRQVTHMIP
TPGFSNQQNVPTNSDYSNGTGYFNGESAMTPHMQQQKQFQSNQSSHQIQHIGGHSNSGIH
SSMLENSSAFGLSDGHVNGGMGLHGSNTQITNRNAAPEGYMNMSSFGSSPRPLQQQFNQH
PTQRISTSVDMGGSGSFYGTGSSALATANNQNMGAANLQSRSRMNSMLLSNQLNMQSIQG
QPQIKTEVLDQSEKLNFQPSQLSHEQLLRQQLSMQQHQVQPSSQFVQNQYHLNQQIPNSQ
HQQAMLRSNSFKQSQLNSSHSMQVSEQGTLPHTELTSSQATEPPALPNFQGQYQQRSAHD
NVKGAQVFGHLSGSQNFSASGSHDSQPLLHPNQQLDVSSSDVSYVLKGTQTEQMQQHQWR
PQTMEKVPISSNLSLEKQMQDDFCQRAMAQDGAQQPFSSDWRVSGCTVTSVDPALPKLPA
GGLEQPTGNINYLRQMRWLLLLFHAKGCSSPLGSCKLPRCVQLQDFVKHLDNCQRKDCPQ
KKCSKSRMLIEHYKTCVDEQCPVCSNVKKFLRLSAEHASKQKVPEPRKVAQQNMTQRIMN
GVDSDIMDIDPVSVESFDGQPSVPKRLKMQPASPNVPEHEILRASNPQVNPGFVLQESHP
ELLEQNKKTAYMKRELDVKADMRPLQKPVKMGYGADGNVPTARHNVIPGVSNEMKSHVKQ
EILPVDKGASENVHEVKNETNDSTEATALKSGKPKIKGVSLTELFTPEQINAHIESLRLW
VGQSKAKAEKNQLLVSSENENSCQLCKVEKLTFEPPPIYCSPCGARIKRNAPYYTVGSGD
TRHFFCIPCYNESRGDTIEVEGQNFLKARFEKKRNDEETEEWWVQCDKCECWQHQICALF
NGRRNDGGQAEYTCPNCYSNEVKCGLRMPLPQSAVLGASDLPRTVLSDHIEERLFKRLKW
ERQSRANNSNCSVDEVAGAEGLVVRVVSSVDKKVEVKPRFLEIFQEDNYPTEFPYKSKAV
LLFQKIEGVEVCLFGMYVQEFGADCAYPNQRRVYLSYLDSVKYFRPEIKAATGEALRTFV
YHEILIGYLEYCKQRGFTSCYIWACPPLKGEDYILYCHPEIQKTPKSDKLREWYLAMLRK
ATKEEIVVELTNLYDHFFITMGECKAKVTASRLPYFDGDYWPGAAEDMINQLRQEEDDRK
LQKKSKTKKIITKRALKAAGHTDLSGNASKDAMLMQKLGETIYPMKEDFIMVHLQYSCSH
CCILMSSGKRWVCHQCRSFYICDKCYSAEQQLDDRERHPSNSRDTHKLHPVDIVGVPEET
KDRDDILESEFFDTRQAFLSLCQGNHYQYDTLRRAKHSSMMVLYHLHNPTAPAFVTTCNV
CSHDIETGQGWRCEICPDFDVCNGCYQKGAVNHPHKLTNHPSVADRDAQNKEARQMRVQQ
LRKMLDLLVHASTCRSGSCQYPNCRKVKGLFRHGMQCKTRASGGCALCKKMWYMLQLHAR
ACRDSGCSVPRCRDLKEHLRRLQQQSDSRRRAAVNEMMRQRAAEVATT
>TraesCS6D02G317200.1
MAHVPASVEDARLIIDSLREDPLYGQQLPPVSDSINENACQLCKQEKLTFEPPPMYCFPC
GARIRRNGPYYAYDTRDTHHSVCIPCYNKSRGHTIEVEGQMFPKARFQKKRNDEETEECW
VNCERCNCWQHQICALFNDINYDVKQAYTCLYCYIEEVKRGLHVPSPQSAVLGASDLPRT
ALSDHIEERLFKRLKLERQARAVQSGRSFDEVAGADGLVVRVVSSVDKKVGVKPRFLETF
QEDNYPTEFPYKSKAVLLFQKIDGVEVCLFGMYVQEFGAECAFPNQRRVYLSYLDSVKYL
RPGIKAATGEALCTFVYHEILIGYLEYCKQRGFTSCYIWARPPLEGDNIFYCNPTIQTTR
TSDKLREWCLAMIRKATKEEIVVELTNLYDHFFITTGECKAKVTASRLPYFDGDYWPGVA
EDMVNQLHQEEDDQKLQKKGNAKKIIRKRALEAAGHTDLSGNASEDDMLMQKLGETIYPM
KEDFIMVHLQYSCSNCRSFMSSGKRWACHQCRSFYICDKCYSAEQELEERERHPSNSRET
HELHPVDIVGVPEETKDGDGIIESKFFDTRHAFLSLCQENHYQFDTLRRAKHSSMMVLYR
LHNPTVV
>TraesCS7A02G414500.1
MNLGQVSNLSGKTTQMNPGSSHGMLQQQQQRQVAFGHPGVDPEFVNLRKNMLQRILDLII
AKRNASPGMMPNMTNLAKRLEVALFMAHPTKADYYKMFKGPIKEHLAHAFRTISAQGQQR
QQMLGQVAPSSNHVTMIPTPGMSQCTNGNSVMPYVMDTTTTTDNSSAGSMYNGYQNPSTN
TPLNSTTNSLSMAATSESMQQHVNHMIPTPGFSNQQTLLANSEYSSQVGCFNVESNVVPQ
MQQQQKPFGNNQGFYPVHHLQGHAGSGVYPSTLNGGMDTQRPRMQLINRNMSSEAFANLS
YGSSCNSLSQQQFNAHAPQRTPTSVDPAVSRGLYDTNSSILTARSNQDISDANIMSNSRM
NSEFLASESTTKSVQQPPRYHNNADCLNPQDMVSLSTSQLSHEQPLRQPHQLQPNHPDSQ
LVQNHYVFSPRQQNSQQNQSQDFFGQENSAQDKGHQLGGTGTSFDSKLLKPSVIQNEQDS
KSMKNHLNQLRWLLMLKHAEGCQAPKGSCKSQYCVPVQEIVKHFRNCQTKICSYRYCSSS
KILSSHYKNCIEKDCSLCSKVKERLRRSSEQAHKHNRDETIVITKQNMVQKITNGAFDEK
MDIDLVVVETIDEQQSIPKRAKLQHISPSASKNGILHVPVPGTSPLVLHKPKNKTVPKQE
VSARGDEKIGVMRSNVILGALNVIDSNVKQEKLLLDNDMKENVIDLKNITNGRKDVMVSK
SGKPKIKGVSLMELFTPEQIKDHTDSLKHWVGQSKAKAGKHQVIEHSENDNICQLCKVEK
LYFEPPPIYCSPCGARIKRNASYYTAAATETCHNFCILCYNEARSSTIQVEGNQFPKAKL
HKMRNDDETEEGWVMCDKCERWQHQICALFNFKRDDSKEAEYTCPKCYVQEIEHGLRIPL
PQSAVLGAKDLPRTVLSDHIEERLFKRLREERHERAIRDGKNFDEVSGADGLVVRVVSSV
DKKLEVKPRFLEIFQEEKYPAEFPYKSKAIVLFQKIEGVEVCLFSMYVQEFGAECADPNQ
RRVYLSYLDSVKFFRPDVKTVSGEALRTYVYHEILIGYLEYCKQRGFTSCYIWACPPLKG
EDYILYCHPEIQKTPKSDKLREWYLSMLRKAVKERIVVELTNLYDHFFITTKECKAKVTA
ARLPYFDGDYWPGAAEDMINQLFLEEDDRKLQKKGKLKKTITKRALRAAGQTDLSGNASK
DAILMQKLGETIYPMKEDFIMVHLQHSCSHCSTLMVAGKRWVCHQCKSFYICDSCYDSEQ
RLEEKERHPSNSRDLHVLHPVDIVGVPEDTKDRDDVLECEFFDTRQAFLSLCQGNHYQYD
TLRRAKHSSMMVLYHLHNPTAPAFVTTCNICNNDIEAGQGWRCEECPDFDVCAGCYNKDG
GANHRHKLTNHPCVDRNAQNKEARQMRIQQARRMLDLLVHAHKCRTAGCQYPDCRRLKGL
FGHATRCQKRAAGGCSLCQRTWSLLQLHARTCKESKCTIPRCRDLKAHLRWTQQQSESRR
RAAVNEMMRQRAAEVARS
>TraesCS7B02G314400.2
MNLGQVSNLSGKTTQMNPGSSHGMPQQQQQRQVALGHPGVDPEFVNLRKAMLQRILELII
AKRNAPPGMIPNMTNLAKRLEVALFMAHPTKADYYKMFKEPIKEHLAHAFRTISAQGQQR
QQMLGQVAPSSNHVTMIPTPGMPQCGNGNSAMPYVMDTTTTTDNSSAGSMYNGYQNPSTN
TPLNSTTSSLSMVTTSESMQRHANHMIPTPGFSNQQTVLANSSEYSSQVGCFNVESNVVP
QMQQQQKPFGNNQGRYPVHHLEGHAGSGVYPSTLNGGVDTQRPRMQLINRNMSSEAFANL
SSYGSSCNSLSQQQFNAHAPQRTPTSVDTAVSRGLYDTNSSILTARSNQDISDVDIMSNS
RMNSEFLASQSTTKSVQQPPRYHNNAEGFSTSQLSHEQPLRQPHQLQPNHPDSQLVQNHY
VFSPRQQNSQQNQGQEFFGQEKRAQDKGHQLGCTVTSFDSKLSKPSVIQNEQDSKIMKNQ
LNQLRWLLMLKHAEGCQAPKGSCKSQYCVPVQEIVKHFRNCQMKICSYRYCSSSKILSSH
YKNCIEKDCSLCSKVKERLRRSSEQAHKHNRDETIVITKQNMVQKITNGAFDEKMDIDLV
VVETIDEQQSVPKRAKLQHMSPSASKNGILHVPVPGTSPLVLHKPKNKTVPKQEVSARVD
EKIGVMRTNVILGALNVIDSNVKQENLLLDSDMKENVIDLKNVTNGRKDVMVSKSGKPKI
KGVSLMELFTPEQIKDHTNSLKHWVGQSKAKAGKHQVIEHSENDNICQLCKVEKLYFEPP
PIYCSPCGARIKRNASYYTAAATETCHNFCILCYNEARSSTIQVEGNQFPKAKLQKLRND
DETEEGWVMCDKCERWQHQICALFNFKRDDSKDAEYTCPKCYVQEIEHGLRIPLPQSAVL
GAKDLPRTVLSDHIEERLFKRLREERHERAIRDGKNFDEVSGADGLVVRVVSSVDKKLEV
KPRFFEIFQEDKYPAEFPYKSKAIVLFQKIEGVEVCLFSMYVQEFGAECADPNQRRVYLS
YLDSVKFFRPDVKTVSGEALRTYVYHEILIGYLEYCKQRGFTSCYIWACPPLKGEDYILY
CHPEIQKTPKSDKLREWYLSMLRKAVKERIVVELTNLYDHFFITTKECKAKVTAARLPYF
DGDYWPGAAEDMINQLFLEEDDRKLQKKGKLKKTITKRALRAAGQTDLSGNASKDAILMQ
KLGETIYPMKEDFIMVHLQHSCSHCSTLMVAGKRWVCHQCKSFYICDSCYDSEQRLEEKE
RHPSNSRDLHVLHPVDIVGVPEDTKDRDDVLECEFFDTRQAFLSLCQGNHYQYDTLRRAK
HSSMMVLYHLHNPTAPAFVTTCNICNNDIEAGQGWRCEECPDFDVCAGCYNKDGGANHRH
KLTNHPCVDRNAQNKEARQMRIQQARRMLDLLVHAHKCRTAGCQYPDCRRLKGLFGHATR
CQKRAAGGCSLCQRTWSLLQLHARTCKESKCTIPRCRDLKAHLRWTQQQSESRRRAAVNE
MMRQRAAEVARS
>TraesCS7D02G407600.2
MNLGQVSNLSGKTTQMNPGSSHGMPQQQQQRQVALGHPGVDPEFVNLRKNMLQRILDLII
AKRSGSPGMMPNMTNLAKRLEVALFMAHPTKADYYKMFKGPIKEHLAHAFRTISAQGQQR
QQMLGQVAPSSNHVTMIPTPGMSQCANGNSVMPYVMDTTTTTGNSSAGSMYNGYQNPSTN
TPLNSTTNSLSMATTSESMQQHVNHMIPTPGFSNQQTLLANSEYSSQVGCFNVESNVVPQ
MQQQQKPFDNNQGFYPVHHLQGHAGSGVYPSTLNGGMDTQRPRMQLIDRNMSSEAFANLS
YGSSCNSLSQQQFNAHAPQRTPTSVDPAVSRGLYDTNSSILTARSNQGISDANIMSNSRM
NSQFLASESTTKSVQQPPRYHNNADCLNPQDMVSLSTSQLSHEQPLRQPHQLQPNHPDSQ
LVQNHYVFSPRQQNSQQNQGQDFFGQENRAQDKGHQLGGTVTSFDSKLLKPSVIQNEQDS
KSMKNHLNQLRWLLMLKHAEGCQAPKGSCKSQYCVPVQEIVKHFRNCQTKICSYRYCSSS
KILSSHYKNCIEKDCSLCSKVKERLRRSSEQAHKHNRDETIVITKQNMVQKITNGAFDEK
MDIDLVVVETIDEQQSIPKRAKLRHISPSASKNGILHVPVPGTSPLVLHKPKNKTVPKQE
VSARVDEKIGVMRTNVILGALNVIDSNVKQEKLLLDNDMKENVIDLKNITNGRKDVMVSK
SGKPKIKGVSLMELFTPEQIKDHTDSLKHWVGQSKAKAGKHQVIEHSENDNICQLCKVEK
LYFEPPPIYCSPCGARIKRNASYYTAAATETCHNFCILCYNEARSSTIQVEGNQFPKAKL
HKMKNDDETEEGWVMCDKCERWQHQICALFNFKRDDSKEAEYTCPKCYVQEIEHGLRIPL
PQSAVLGAKDLPRTVLSDHIEERLFKRLREERHERAIRDGKNFDEVSGADGLVVRVVSSV
DKKLEVKPRFFEIFQEDKYPAEFPYKSKAIVLFQKIEGVEVCLFSMYVQEFGAECADPNQ
RRVYLSYLDSVKFFRPDVKTVSGEALRTYVYHEILIGYLEYCKQRGFTSCYIWACPPLKG
EDYILYCHPEIQKTPKSDKLREWYLSMLRKAVKERIVVELTNLYDHFFITTKECKAKVTA
ARLPYFDGDYWPGAAEDMINQLFLEEDDRKLQKKGKLKKTITKRALRAAGQTDLSGNASK
DAILMQKLGETIYPMKEDFIMVHLQHSCSHCSTLMVAGKRWVCHQCKSFYICDSCYDSEQ
RLEAKERHPSNSRDLHVLHPVDIVGVPEDTKDRDDVLECEFFDTRQAFLSLCQGNHYQYD
TLRRAKHSSMMVLYHLHNPTAPAFVTTCNICNNDIEAGQGWRCEECPDFDVCAGCYNKDG
GANHRHKLTNHPCVDRNAQNKEARQMRIQQARRMLDLLVHAHKCRTAGCQYPDCRRLKGL
FGHATRCQKRAAGGCSLCQRTWSLLQLHARTCKESKCTIPRCRDLKAHLRWTQQQSESRR
RAAVNEMMRQRAAEVARS
>TraesCS7A02G514800.1
MSDGERRDEDVATTSAADDDDDEDYEEPGGENHFLGFMFGNVDDAGDLDADYLDEDAKEH
LFALADKLGASLKDIDLTKSSPATADPSEQDYDEKAEDAVDYEDIDEQYDGPEVEAATEE
DHLLSKKDYFSSNTMFASVSSKVSVFDEENYDEDEEPPNDIELPGDNVIQDVISAEQPEI
SPSNDNPAIGKVSSPLPQSQETMDVEYEVCQEEIDTEEDQLESKSATTLPVLCIEDGSVI
LKFSEIFGAQEPVRKAKTDQHKRPVNKELRITNISDIVEDDEEVFLRSTIQDVPSLKHIK
TNEDFIESDSDELISSDTFGFKDLCLSEQPMKDVHKEFPTAKQTLVCPDVYPLEHEDWEN
GIIWGNSPASESQSCLKSCVISEESSDAHSEDEAKDYGYVSGRCDVQDKNNGSPVIREPF
GCTEMPASASYHSPENSYPPLIKETPQEKNDLDHAEPNNINGTVKINTMKCLSNLSLLNK
ELLEGSWLDNVIWDPSEDTPKPKLILDLKDDQMLFEILDEKNGDHLRSHARAMIVSRPMK
TATVENVGHNNQAITLDAQFNISNDKFYSNRKMSQQAKSHTKKRSSMGIKVVHSVPGQKL
QTMKPKLSTNEIANFHRPKAKWYPHENKLAAELQGAACSHGSMTVIVMTLAGKGVKLLVN
AEETPLSVKSKASKKLEFRPSEKIKLFGYGKELQDDISLAMQNVRPNSILHVVRTEVHLW
PKAQKLPGEDKALRPPGAFRKKADLSVKDGHVFLMEYCEERPLLLANAGMGARLCTYYQK
TSPTDQTAISLRSNNDGLGTVLAIEPADKSPFLGDVRSGSQQSCLETNMYRAPAFPHKLA
STDYLLVRSPKGMLSLRRIDKLYAVGQQEPHMEVFSPGTKNLQNHLLNRMLVYVYREFRL
RERPGVLSQIRADEVPIQHPLTEAIVRKRLKHCADLKKGPNGHYFWTQRPDFRIPSEEEL
RRLVSPESVCCHESMQAGLHRLNRLGIEKLTQPVGLASAMNQLPDEAIELAAAAHIEREL
QITSWNLTSNFVACTNQDRENIERLEITGVGDPSGRGLGFSYVRVTPKAPVSNSSHKKKS
AAAKGTTVTGTDADLRRLSMDAARELLLKFGVPDEQIDKLTRWHRIAMVRKLSSEQAASG
ITIDEIPVSKFARGQRMSFMQLQQQTKEKCQEIWDRQIQSLSAIDGDDNGSDTEAHSDLD
SFAGDLENLLDAEEFDDEEVGTADLRSDKADGMRGLKMRRCPTQAQFNEEIQDDQAEAAL
VKKLLEESGNDPKRKKQPVDTTNQGANKTKQFKALTPKESTPRGAKEVDSSFTEGGLSSK
LKTKLAVDANDIILVKKKNVQGKDGLKEKRQGARGDSLVCGACGQLGHMRTNKLCPKYGE
DPETSEMDAISYRPNPLDVASHGQTKTLGRRLVAKVSSDVPETEGQESIEKIKPVKFRCG
APEKSLERNMSVAGSLVSDKLTTDSTDLRSTGKVSKIKIYSKPKTEDYPPDTPKPSVVIR
PPAEVEKDVPRKKVIIKQPKGHVDQLRAIEVRSSQEPRKIRKIAELSSFEKNSRDDDGWY
AGEPSQMNSSHDRLGRDGNRKSKEVTGGDESWRAFKEQRERQEQRLIEARIYSREEELQK
AKKKSKKKKKHDFRDADILDHRPYRNDRKVPERDRASKRRTPADMTDYAPSAKRRRGGEV
ELSNILEKIVDHLRNQTAISLLFLKPVTKKVAPDYYDVIQRPMDLGTIRDKARKMEYKNR
YEFRNDVAQIADNAHMYNETRHPHIPPLADELLELCDNLLDESADVLDDAESAMES
>TraesCS7A02G515000.1
MRTASASQPSLVPTPSPLSAPPLLASPPRRRAPPRIPAASADGVSEAEAMSDSERDDQDD
VATTSAADDDDEDDYEEPGEGNRLLGFMFGNVDDAGGLDADYLDEDAKDHLFALADKLGP
SLKDIDLTKSSSAPDDPSEQDYDEKAEDAIDYEDIDEQYDGPEVEAATEEYHLLSKKDYL
SSNTMFASVCSKVSVFDEENYDEDEEPPNDIELPGDYFIQAEQLGISPSNDNPAIEMLSS
SLPQLGESMDVEYEVCKEEIDIEEDQLESKSATSLPVLCIEHGSAILKFSEVFGVQEPVR
KAKTDHHKRPVSKDVRITNISDIVEDDEEVFLRCAIQDVSSLKHIKMNEDFVESDSDELI
SSDTFGFKDSCLSEQPMKEAHKDFPTAQQAPVCPDVYPLEHEDWENGIIWGNSPASESRS
CLKSCVISEESSDTHSEDEAKDYGYVSRYCDVQSRNNDSPESFGYTEMPASASYHSPENS
YPPLTKETSPEKNDLDHTEPNNINGTVKIVTMKCLSNLSLLNKELLEGSWLDNIIWDHSE
DAPKPKLIMDLKDDQMLFEILDEENRDHLRSHAFAMIVSRSVRTSTVENFGHNNQIVTFD
GQFNISNDKFYSNKEISQQAKSHTKKRSSMGIKVVHSVPAQKLQTMKLNLSINEIANFHR
PRAKWYPHENKLAVELQGAACSHGSMTVIVMTLAGKGVKLLVNADKTPLSVKSKASKKLE
FRPSEKIKLFGSGKELQDDISLAMQNVRSNSILHVVRTEVHLWPKAQRLPGKDKALRPPG
AFRKRADLSVKDGHVFLMEYCEERPLLLANAGMGARLCTYYQKTSPDDQTATSLRSNNDG
LGTVLAIEPADKSPFLGDVRSGSHQSCLETNMYRAPAFPHKVASTDYLLVRSPKGMLSLR
RIDKLYAVGQQEPHMEVFSPRPKNLQNYLLNRILVYVYREFRVRERPGVLSQIRADEIPI
EHPLTEVIVRKGLKHCADLEKGPNGHLFWTQRADFRIPSEDELRRLLSPESVCCHESMQA
AQHRLKHLGIHKLTQPVGLASAMDQLPDKAIELAAAAHIERELQITSWNLTSNFVACMNQ
DRESIERLEISGIGDPSGRGLGFSYVRVNPVSNLPHKKKPAAAKGTTVTGTDADLRRLSM
DAARELLLKFGVPDEQIDKLTRWHRIAMVRKLSSEQAASGIMIDEIPVSKFARGQRMSFL
QLHHQAKEKCQEIWDRQFQSLSAIDGDDNGSDTEAKSNLDSFAGDLENLLDAEEFDNEDV
GTADLRSDKGDDMEGLKMRKGSTQVQFNKENQDDQAEAALVKKLLEESGNDIKRKKEPVE
MTNYGISMYNQGANKTKPSQSALALEESTPRGVKEEKRQGAKVDSLICGACGTLGHMRTN
KLCAKYGQDPETSGLDVISYISNPFDEASYVETTKPPGRRLVAKVSSEVPETEGPDCIEM
IKPVKFRCGAPEKSLDRNMSVAGSLVSDKLTMDANDLRSTGNASKIKICSKTKSEDYPPD
TPKPSIVIRLPAKAEKDLPRKKVIFKQPEGHVGQLTVIGNRSGQEPRKLRKISELPSFKE
NIRENDGWYAGEPCQMNSSQDRLGLDGNRKSKVVGSDESWSAFKEQRVIQERRLIQARMQ
GLSREEELQKSKRKNKKKKRHEFQDDDVLDHRPYRNDRRVPERDRATKRRTPADMTENAP
SVKRRRGGEVELSNILEKIVDLLRNQTSISLLFLKPVTKKVAPDYYDIIQRPMDLGTIRD
KARKMEYRNREEFRHDVAQIATNAHIYNDTRHPHIPPLAASS
>TraesCS7B02G431500.1
MSDGERRDEDVATTSAADDDDDEDYEEPGGENHFLGFMFGNVDDAGDLDADYLDEDAKEH
LFALADKLGASLKDIDLTKSSPATADPSEQDYDEKAEDAVDYEDIDEQYDGPEVEAATEE
DHLLSKKDYFSSNTMFASVSSKASVFDEENYDEDEEPPNDIELPGDNVIQDVISAEQPEI
SPSNDNPAIGKVSSPLPQSQETMDVEYEVCQEEIDTEEDQLESKSATTLPVLCIEDGSVI
LKFSEIFGAQEPVRKAKTDQHKRPVNKELRIPNISDIVEDDEEVFLRSTIQAVPSLTHIK
TNEDFIESDSDELISSDTFGFKDLCLSEQPMKDVHKEFPTAKQALVCPDVYPLEHEDWEN
GIIWGNSPASESQSCLKSRVISEESSDAHSEDEGKDYGYVSGRCDVQDKNNASPVIREPF
GCTEMPASASYHSPDNSYPPLIKETPQEKNDSDHAEPNNINGTVKINTMKCLSNLSLLNK
ELLEGSWLDNVIWDPSEDTPKPKLILDLKDDQMLFEILDEKNGDHLRSHARAMIVSRPMK
TATVENVGHNNQAITLDAQFNISNDKFYSNRKMSQQAKSHTKKRSSMGIKVVHSVPGQKL
QTMKPKLSTNEIANFHRPKAKWYPHENKLAAELQGAACSHGSMTVIVMTLAGKGVKLLVN
AEETPLSVKSKASKKLEFRPSEKIKLFGYGKELQDDISLAMQNVRPNSILHVVRTEVHLW
PKAQKLPGEDKALRPPGAFRKKADLSVKDGHVFLMEYCEERPLLLANAGMGARLCTYYQK
TSPTDQTAISLRSNNDGLGTVLAIEPADKSPFLGDVRSGSQQSCLETNMYRAPAFPHKLA
STDYLLVRSPKGMLSLRRIDKLYAVGQQEPHMEVFSPGTKNLQNHLLNRMLVYVYREFRL
RERPGVLSQIRADEVPIQHPLTEAIVRKRLKHCADLKKGPNGHYYWTQRPDFRIPSEEEL
RRLVSPESVCCHESMQAGLHRLNRLGIEKLTQPVGLASAMNQLPDEAIELAAAAHIEREL
QITSWNLTSNFVACTNQDRENIERLEITGVGDPSGRGLGFSYVRVTPRGPVPNSSHKKKS
AAAKGTTVTGTDADLRRLSMDAARELLLKFGVPDEQIDKLTRWHRIAMVRKLSSEQAASG
ITIDEIPVSKFARGQRMSFMQLQQQTKEKCQEIWDRQIQSLSAIDGDDNGSDTEAHSDLD
SFAGDLENLLDAEEFDDEDVGTADLRSDKADGMRGLKMRRCPTQAQFNEEIQDDQAEAAL
VKKLLEESGNDTKRKKQPVDTTNQGANKTKQFKALTPKESTPRGAKEVDSSFTEGGLSSK
LKTKLTVDANDIILVKKKNVQGKDGLKEKRQGARGDSLVCGACGQLGHMRTNKLCPKYGE
DPETSEMDAISYRPNPLDVASHGQTKTLGRRLVAKVSSDVPETEGQESIEKIKPVKFRCG
APEKSLERNMSVAGSLVSDKLTMDATDLRSTGKVSKIKIFSKPKTEDYPLDTPKPSVVIR
PPAEVEKDVPRKKVIIKQPKGHVDQLRAVEVRSGQEPRKIRKIAELSSFEKNSRDDDGWY
AGEPSQMNSSRDRLGRDGNRKSKEVMGGDESWRAFKEQRERQEQRLIEARIYSREEELQK
AKKKSKKKKKHDFRDADILDHRPYRNDRKVPERDRASKRRTPADMTEYAPSAKRRRGGEV
ELSNILEKIVDHLRNQTAISLLFLKPVTKKVAPDYYDVIQRPMDLGTIRDKARKMEYKNR
YEFRNDVAQIADNAHEYNETRHPHIPPLADELLELCDHLLDESADVLDDAESAMES
>TraesCS7B02G431700.2
MSDGERDEDDVATTSAADDDDDDDYEEPGGGNRLLGFMFGNVDDAGDLDADYLDEDAKDH
LFALADKLGPSLKDIDLTKSSSVPDDPYEQDYDEKAEDAIDYEDIDEQYDGPEVEAATEE
DHLLSKKDYLSSNTMFASVCSEVSVFDEENYDEDEEPPNDMELPGDYFIQAEQLGISPSN
DNPAIEMVSSSLPQLEESMDVEYEVCQQEEIDIEEDQLESKSATSLPVLCIEHGSAILKF
SEVFGVQEPVRKAKTDHHKRPVSKDVRITNISDIVEDDEEVFLRCAIQDVSSLKHIKMNE
DLVESDSDELISSDTFGFKDSCLSEQPMKEAHKDFPTAQQAPVCPDVYPLEHEDWENGII
WGNSPASESRPCLKSCVISEESSDTHSEDEAKDYGYVSRYCDVQSRNNGSPEPFGFTEMP
ASASCHSPENSYPPLTKETRLEKNDLDHAEPNNINGAVKIATMKCLSNLSLLNKELLEGS
WLDNIIWDHSEDAPKPKLIMDLKDDQMLFEILDEENGNHLRSHAFAMIVSRSVRTSTVEN
FGHKNQIITFDGQFNISNDKFYSNKEISQQAKSHTKKRSSMGVKVVHSVPALKLQTMKLN
LSINEIANFHRPKAKWYPHENKLAVELQGVACSHGSMTVIVLTLGGKGVKLLVNAEETPL
SVKSKASKKLEFRPSEKIKLFGSGKELEDDISLAMQNVRPNSILHVVRTEVHLWPKAQRL
PGKDKALRPPGAFRKRSDLSVKDGHVFLMEYCEERPLLLANAGMGARLCTYYQKTSPDDQ
TATSLRSNNHGLGTVLAIEPAGKSPFLGDVRSGSHQSCLETNMYRAPAFPHKVASTDYLL
VRSPKGMLSLRRIDKLYAVGQQEPHMEVFSPRPKNLQNYLLNRILVYVYREFRVRERPGV
LSQIRADEIPIEHPLTDVIMRKGLKHCADLEKRPNGHLFWTQRADFRIPSEDELRRMLSP
ESVCCHESMQAAQHRLKHLGIHKLTQPVGLASAMDQLPDKAIELAAAAHIERELQITSWS
LTSNFVACMNQDRENIERLEISGIGDPSGRGLGFSYVRVNPVSNLPHKKKPAAAKGTTVT
GTDADLRRLSMDAARELLLKFGVPDEQIDKLTRWHRIAMVRKLSSEQAASGIMIDEIPVS
KFAREQRMSFLQLHHQAKEKCQEVWDRQFQSLSAIDDDDNGSDTEANSDFDSFAGDLENL
LDAEEFDNEDVGNADLRSDKGNDMEGLKMRKFSTRVQFNEEDDQAEAALVKKLLEESGND
IKGKKQPVEMTNYGTSMYNQGANKTKPRQSALTLEESTPRVVKEEKRQGAKGDQQTLCLV
CGACGKLGHMRTNKLCPKYGQDPETSGLDVISYRSNPLDEASHVQTTKPPGRRLVAKVSS
EVPETEGPDCIEKIKPVRFRCGAPEKSLERNMSVAGSLVSDKLTMDANDLRSTGNVSKIK
ICSKTKSEDYPPDTPKPSIVIRLCAKAEKDVPRKKVIFKQPEGHVGQLTAIENRSGQEPR
KLRKISELPSFKENIRENDGWYAGEPCQMNSSQDRLGLDGNRKSKVVGSDESWSAFKEQR
VMQEQRLIQARMQEVSREEELQKSKRKNKKKKRHEFRDDDVLDHRPYRNDRRVPERDRAT
KRRTPADMAENAPSAKRRRGGEVELSNILDKIVDHLRNQTSISLLFLKPVTKKVAPDYYD
VIQRPMDLGTIRDKARKMEYRNREEFRHDVAQIATNAHIYNDTRHPHIPPLADQLLKICN
RLLEESADALNDAESAIEGLAQ
>TraesCS7D02G505200.1
MSDGERRDEDVATTSAADDDDDEDYEEPGGENHFLGFMFGNVDDAGDLDADYLDEDAKEH
LFALADKLGASLKDIDLTKSSPATADPSEQDYDEKAEDAVDYEDIDEQYDGPEVEAATEE
DHLLSKKDYFSSNTMFSSVSSKVSVFDEENYDEDEEPPNDIELPGDNVIQDVISAEQPEI
SPSNDNPAIGKVSSPLPQSGETMDVEYEVCQEEIDTEEDQLESKSASTLPVLCIEDGSVI
LKFSEIFGAQEPVRKAKTDQHKRPVNKELCITNISDIVEDDEEVFLRSTIQDVSSLKHIK
MNEEFIESDSDELISSDTFGFKDLCLSEQPMKDVHKEFPTAKQALVCPDVYPLEHEDWEN
GIIWGNSPASESQSCLKSCLISEESSDAHSEDEAKDYGYVSRRCDVQDKNNGSPVITEPF
GCTEMPASASYHSPENSYPPLIKETPQEKNDLDHAEPNNINGTVKINTMKCLSNLSLLNK
ELLEGSWLDNVIWDPSEDTPKPKLILDLKDDQMLFEILDEKNGDHLRSHARAMIVSRPIK
TATVENFGHNNQAITLDAQFNISNDKFYSNRKMSQQAKSHTKKRSSMGIKVVHSVPGQKL
QTMKPKLSTNEIANFHRPKAKWYPHENKLAAELQGAACSHGSMTVIVMTLAGKGVKLLVN
AEETPLSVKSKASKKLEFRPSEKIKLFGYGKELQDDISLAMQNVRPNSILHVVRTEVHLW
PKAQKLPGEDKALRPPGAFRKKADLSVKDGHVFLMEYCEERPLLLANAGMGARLCTYYQK
TSPTDQTAISLRSNNDGLGTVLAIEPADKSPFLGDVRSGSQQSCLETNMYRAPAFPHKLA
STDYLLVRSPKGMLSLRRIDKLYAVGQQEPHMEVFSPGTKNLQNHLLNRMLVYVYREFRL
RERPGVLSQIRADEVPIQHPLTEAIVRKRLKHCADLKKGPNGHYYWTQRPDFRIPSEEEL
RRLVSPESVCCHESMQAGLHRLNRLGIEKLTQPVGLASAMNQLPDEAIELAAAAHIEREL
QITSWNLTSNFVACTNQDRENIERLEITGVGDPSGRGLGFSYVRVTPKAPVSNSSHKKKS
AAAKGTTVTGTDADLRRLSMDAARELLLKFGVPDEQIDKLTRWHRIAMVRKLSSEQAASG
ITIDEIPVSKFARGQRMSFMQLQQQTKEKCQEIWDRQIQSLSAIDGDDNGSDTEAHSDLD
SFAGDLENLLDAEEFDDEDVGTADLRSDKADGMRGLKMRRCPTQAQFNEEIQDDQAEAAL
VKKLLEESGNDTKRKKQPVDTTNQGANKTKQFKALTPKESTPRGAKEVDSSFTEGGLSSK
LKTKLTVDANDIILVKKKNVQGKDGLKEKRQGARGDSLVCGACGQLGHMRTNKLCPKYGE
DPETSEMDAVSYRPNPLDVASHGQTKTLGRRLVAKVSSDVPETEGQESIEKIKPVKFRCG
APEKSLDRNMSVAGSLVSDKLTTDATDLRSTGKVSKIKIYSKPKTEDYPPDTPKPSVVIR
PPAEVEKDVPRKKVIIKQPKGHVDQLRAIEVRSGQEPRKIRKIAELSSFEKNSRDDDGWY
AGEPSQMNSSHDRLGRDGNRKSKEVMGADESWRAFKEQRERQEQRLIEARIYSREEELQK
AKKKSKKKKKHEFRDADILDHRPYRNDRKVPERDRASKRRTPADMTDYAPSAKRRRGGEV
ELSNILEKIVDHLRNQTAISLLFLKPVTKKVAPDYYDVIQRPMDLGTIRDKARKMEYKNR
YEFRNDVAQIADNAHIYNETRHPHIPPLADELLELCDNLLDESADVLDDAESAMES
>TraesCS7D02G505400.1
MSDGERDEDDVATTSAADDDDEDDYEEPGGGNRLLGFMFGNVDDAGGLDADYLDEDAKDH
LFALADKLGPSLKDMDLTKSSSVPDDPSEQDYDEKAEDAIDYEDIDEQYDGPEVEAATEE
DHLLSKKDYLSSNTMFALVCSKVSVFDEENYDEDEEPPNDIELPGDYSIQAEQLGISPSN
DNPAIETVSSSLTQLGESMDVEYEVCQQEEIDIEEDQLESKCATSLPVLCMEHGSAILKF
SEVFGVQEPVRKAKTDHHKRPVSKDVRITNISDIVEDDEEVFLRCAIQDVSSLKHIKMNE
DFVESDSDELISSDTFGFKGSCLSEQPMKEAHKDFPTAQQAPVCPDVYPLEHEDWENGII
WGNSPASESRSCLESCVISEESSDTHSEDEANDYGYVSRYCDVQSRNNDSPEPFGYTEMP
ASASYHSPENSYPPLTKETSPEKNDLDHAEPNNINGTVKIVTMKCLSNLSLLNKELLEGS
WLDNIIWDHSEDAPKPKLIMDLKDDQMLFEILDEENGDHLRSHAFAMIVSGSVRTSTVEN
FGRNNQIVTVDGQFNISNDEFYSNKEISQQAKSHTKKRSSMGVKVVHSVPAQKLQTMKLN
LSINEIANFHRPKAKWYPHENKLAVELQGAACSHGSMTVIVMTLGGKAVKLLVNAEETPL
SVKSKASKKLEFRPSEKIKLFGSGKELQDGISLAMQNVRPNSILHVVRTEVHLWPKAQRL
PGKDKALRPPGAFRKRSDLSLKDGHVFLMEYCEERPLLLANAGMGARLCTYYQKTSPDDQ
TATSLRSNNDGLGTVLAIEPADKSPFLGDVRSGSHQSCLETNMYRAPAFPHKVASTDYLL
VRSPKGMLSLRRIDKLYAVGQQEPHMEVFSPRPKSLQNYLLNRILVYVYREFRARERPGV
LSQIRADEIPIEHPLTEVIVRKGLKHCADLEKGPNGHLFWTQRADFRIPSEDELRRLLSP
ESVCCHESMQAAQHRLKHLGIHKLTQPVGLASAMDQLPDKAIELAAAAHIERELQITSWN
LTSNFVACMNQDRENIERLEISGIGDPSGRGLGFSYVRVNPVSNLPHKKKPAAAKGTTVT
GTDADLRRLSMDAARELLLKFGVPEEQIDKLTRWHRIAMVRKLSSEQAASGIMIDEIPVS
KFARGQRMSFLQLQHQAKEKCQEIWDRQFQSLSAIDGDDNGSDTEANSDFDSFAGDLENL
LDAEEFDNEDVGNADLSSDKGNDMEGLKMRKFSTRVQFNEEDDQAEAALIKKLLEESGND
IKGKKQPVEMTNYGTSMYNQGANKTKPRQSALTLEESTPGGVKEEKRQGAKGDQQTLCLV
CGACGKLGHMRTNKLCPKYGQDPETSGLDVISYRSNPLDEASHVQTTKPPGRRLVAKVSS
EVPETEGPDCIEKIKPVKFRCGAPEKSLERNMSVAGSLVSDKLTMDANDLRSTGNVSKIK
ICSKTKSEDYPPDTPKPSIVIRLRAKAEKDVPRKKVIFKQPEGHVGQLTAIENRSGQEPR
KLRKIAELPSFKENSRENDGWYAGEPSQMNSSQDRLGLDGIRKSKIVGSDESWSAFKEQR
VRQEQRLIQARMQEVSREEELQKSKRKNKKKKRHEFRDDDVLDHRPYRNDRRVPERDRAT
KRRTPADMTEYAPSAKRRRGGEVELSNILEKIVDHLRNQTSISLLFLKPVTKKVAPDYHD
IIQRPMDLGTIRDKARKMEYRNREELRRDVAQIATNAHIYNDTRNPHIPPLADQLLKSCN
CLLEESADALDDAESAIEGLAQ
>TraesCS1A02G138200.2
MDGLAAPSPSHSGATSGGGASHRKRKLPPPSLSDATADEDDDTTAPSSPATSLSSPSRPS
SPSSSHSDEDDDDSLTTFTAARLDAAPASSSGRPPKPDSSSASAVTAAAPKPDAASAAAG
DGKEDSKGLFTDNIQTSGAYSAREEGLKREEDTGKLKFLCYSNDGVDEHMIWLVGLKNIF
ARQLPNMPKEYIVRLVMDRTHKSMMVIRNNNVVGGITYRPYASQRFGEIAFCAITADEQV
KGYGTRLMNHLKQHARDADGLTHFLTYADNNAVGYFVKQGFTKEITFDKERWQGYIKDYD
GGILMECKIDQKLPYVDLATMIRRQRQAIDEKIRELSNCHIVYSGIDFQKKEAGIPRRLM
KPEDIPGLREAGWTPDQWGHSKSRSTFSSDYNTYRQQLTSLMRMLLKSLVDHADAWPFKE
PVDSRDVPDYYDIIKDPIDLKTMSRRVESEQYYVTLEMFVADLKRMFINARTYNSPDTIY
FKCSTRLEAYFTNRIQSHLAQAASTKN
>TraesCS1D02G134200.1
MDGLAAPSPSHSGATSGGGASHRKRKLPPPSLSDATADEDDDTTAPSSPATSLSSPSRPS
SPSSSHSDEDDDDSLTTFTAARLDAAPASSSGRPPKPDSSSASAVTAAAPKPDAASAAAG
DGKEDSKGLFTDNIQTSGAYSAREEGLKREEDTGKLKFLCYSNDGVDEHMIWLVGLKNIF
ARQLPNMPKEYIVRLVMDRTHKSMMVIRNNNVVGGITYRPYASQRFGEIAFCAITADEQV
KGYGTRLMNHLKQHARDADGLTHFLTYADNNAVGYFVKQGFTKEITFDKERWQGYIKDYD
GGILMECKIDQKLPYVDLATMIRHQRQAIDEKIRELSNCHIVYSGIDFQKKEAGIPRRLM
KPEDIPGLREAGWTPDQWGHSKSRSTFSSDYNTYRQQLTSLMRMLLKSLVDHADAWPFKE
PVDSRDVPDYYDIIKDPIDLKTMSRRVESEQYYVTLEMFVADLKRMFINARTYNSPDTIY
FKCSTRLEAYFTNRIQSHLAQAASTKN
>TraesCSU02G003200.1
MDGLAAPSPSHSGATSGGGASHRKRKLPPPSLSDATADEDDDTTAPSSPATSLSSPSRPS
SPSSSHSDEDDDDSLTTFTAARLDAAPASSSGRPPKPDSSSASAVTAAAPKPDAASAAAG
DGKEDSKGLFTDNIQTSGAYSAREEGLKREEDTGKLKFLCYSNDGVDEHMIWLVGLKNIF
ARQLPNMPKEYIVRLVMDRTHKSMMVIRNNNVVGGITYRPYASQRFGEIAFCAITADEQV
KGYGTRLMNHLKQHARDADGLTHFLTYADNNAVGYFVKQGFTKEITFEKERWQGYIKDYD
GGILMECKIDQKLPYVDLATMIRRQRQAIDEKIRELSNCHIVYSGIDFQKKEAGIPRRLM
KPEDIPGLREAGWTPDQWGHSKSRSTFSSDYNTYRQQLTSLMRMLLKSLVDHADAWPFKE
PVDSRDVPDYYDIIKDPIDLKTMSRRVESEQYYVTLEMFVADLKRMFINARTYNSPDTIY
FKCSTRLEAYFTNRIQSHIAQAASTKN
>TraesCS2A02G320900.1
MAAAVAAAAADQPRRRKPTPGRGGVVLPAGLSEEEARVRAIAEIVSEMGELSRRGEDVDL
NALKSAACRRYGLARAPKLVEMIAAVPEADRAALLPRLRAKPVRTASGIAVVAVMSKPHR
CPHIATTGNICVYCPGGPDSDFEYSTQSYTGYEPTSMRAIRARYNPYVQARSRIDQLKRL
GHSADKVEFILMGGTFMSLPADYRDYFIRNLHDALSGHTSANVEEAVCYSEHSAVKCIGM
TIETRPDYCLGPHLRQMLSYGCTRLEIGVQSTYEDVARDTNRGHTVAAVADCFSLAKDAG
FKVVAHMMPDLPNVGVERDMESFREFFENPAFRADGLKIYPTLVIRGTGLYELWKTGRYR
NYPPELLVDIVARILSMVPPWTRVYRVQRDIPMPLVTSGVEKGNLRELALARMEDLGLKC
RDVRTREAGIQDIHHKIRPDEVELVRRDYAANDGWETFLSYEDTRQDILIGLLRLRKCGR
NVTGSELVGRCSIVRELHVYGTAVPVHGRDAEKLQHQGYGTLLMEEAERIARKEHRSKKL
AVISGVGTRHYYRKLGYELEGPYMVKCLA
>TraesCS2B02G361800.1
MAAVVAAAAADQPRRRKPTPGRGGVVLPAGLSEEEARVRAIAEIVSEMGELSRRGEDVDL
NALKSAACRRYGLARAPKLVEMIAAVPEADRAALLPRLRAKPVRTASGIAVVAVMSKPHR
CPHIATTGNICVYCPGGPDSDFEYSTQSYTGYEPTSMRAIRARYNPYVQARSRIDQLKRL
GHSADKVEFILMGGTFMSLPADYRDYFIRNLHDALSGHTSANVEEAVCYSEHSAVKCIGM
TIETRPDYCLGPHLRQMLSYGCTRLEIGVQSTYEDVARDTNRGHTVAAVADCFSLAKDAG
FKVVAHMMPDLPNVGVERDMESFREFFENPAFRADGLKIYPTLVIRGTGLYELWKTGRYR
NYPPELLVDIVARILSMVPPWTRVYRVQRDIPMPLVTSGVEKGNLRELALARMEDLGLKC
RDVRTREAGIQDIHHKIRPDEVELVRRDYAANDGWETFLSYEDTRQDILIGLLRLRKCGR
NVTGPELVGRCSIVRELHVYGTAVPVHGRDAEKLQHQGYGTLLMEEAERIARKEHRSKKL
AVISGVGTRHYYRKLGYELEGPYMVKCLA
>TraesCS2D02G341600.1
MAAAVAAAAADQPRRRKPTPGRGGVVLPAGLSEEEARVRAIAEIVSEMGELSRRGEDVDL
NALKSAACRRYGLARAPKLVEMIAAVPEADRAALLPRLRAKPVRTASGIAVVAVMSKPHR
CPHIATTGNICVYCPGGPDSDFEYSTQSYTGYEPTSMRAIRARYNPYVQARSRIDQLKRL
GHSADKVEFILMGGTFMSLPADYRDYFIRNLHDALSGHTSANVEEAVCYSEHSAVKCIGM
TIETRPDYCLGPHLRQMLSYGCTRLEIGVQSTYEDVARDTNRGHTVAAVADCFSLAKDAG
FKVVAHMMPDLPNVGVERDMESFREFFENPAFRADGLKIYPTLVIRGTGLYELWKTGRYR
NYPPELLVDIVARILSMVPPWTRVYRVQRDIPMPLVTSGVEKGNLRELALARMEDLGLKC
RDVRTREAGIQDIHHKIRPDEVELVRRDYAANDGWETFLSYEDTRQDILIGLLRLRKCGR
NVTGPELVGRCSIVRELHVYGTAVPVHGRDAEKLQHQGYGTLLMEEAERIARKEHRSKKL
AVISGVGTRHYYRKLGYELEGPYMVKCLA
>TraesCS5A02G197700.1
MALKQKGSDAAAADTSKRRRVGFAGIDAGTEANECMQVFIARNPDEVGSADSTPIEPFDL
NHFFGEDGKIYGYTNLKINVWISAISFHAYAEISFQETSDGGKGITDVKPVLQNIFGENL
VEKDEFLEAFSKECQCISDVVKNGNSIKHDASDEDDLSVQIVRVELQGAAAYLYSRLVSL
VLLLVEGSTPIDITEHGWQMLLVVKKAELESSASKFQLLGFAAVHHFYHYPESTRLRISQ
ILVLPPYQGEGHGRRLLEAINSIAESENMYDVTIEDPSDYLQYVRSSIDCLRLLTFEPIK
PALGAMVLSLEQTNLSKRTRSSIMVPPADLAETVRQKLKINKKQFLRCWEILIYLHLDAE
NLKCIDNFRACIYDRTKGELLGGASGTNGKRLVQVPTSFDEDTSFAVFWTKEGGDEDNQT
VQQQPEDLATQEQQLNELVDNQMEEIAEVAKNVASRVKDKLAA
>TraesCS5B02G186000.1
MALKQKGSDAAAADTGKRRRVGFAGIDAGTEANECMQVFLARNPDEVGSADSTPIEPFDL
NHFFGEDGKIYGYTNLKINVWISAISFHAYAEISFQETSDGGKGITDLKPVLQNIFGENL
VEKDEFLEAFSKECQCISDVVTNGNSIKPDASGEHDLSVEIVRVELQGAAAYLYSRLVSL
VLLLVEGSTPIDITEHGWEMLLIVKKAELESSASKFQLLGFAAVHHFYHYPESTRLRISQ
ILVLPPYQGEGHGRLLLEAINSIAESENMYDVTIEDPSDYLQYVRSSIDCLRLLTFEPIK
PALGAMVLSLEQTNLSKRTRSSIMVPPSDLAETVRQKLKINKKQFLRCWEILIYLHLDAE
NLKCIDNFRACIYDRTKGELLGGASGTNGKRLVQVPTSFDEDTSFAVFWTKEGGDEDNQT
VQLQPEDLATQEEQLNELVDNQMEEIAEVAKNVASRGKDKLAA
>TraesCS5D02G193200.1
MALKQKGSDAAAADTSKRRRVGFAGIDAGTEANECMQVFLARNPDEVGSADSTPIEPFDL
NHFFGEDGKIYGYTNLKINVWISAISFHAYAEISFQETSDGGKGITDLKPVLQNIFGENL
VEKDEFLEAFSKECQCISDVVTNGNSIKPDASGEDDLSAEIVRVELQGAAAYLYSRLVSL
VLLLVEGSTPIDITEHGWEMLLIVKKAELESSASKFQLLGFAAVHHFYYYPESTRLRISQ
ILVLPPYQGEGHGRLLLEAINSIAESENMYDVTIEDPSDYLQYVRSSIDCLRLLTFEPIK
PALGAMVLSLEQTNLSKRTRSSIMVPPSDLAETVRQKLKINKKQFLRCWEILIYLHLDAE
NLKCIDNFRACIYDRTKGELLGGASGTNGKRLVQVPTSFDEDTSFAVFWTKEGGDEDNQT
VQQQPEDLATQEEQLNELVDNQMEEIAEVAKNVASRGKDKLAA
>TraesCS2A02G159700.1
MGSMELSTAPENGTAAAAAACNGGAAPANGGVERRLRSSAASASWAAHLPLEVGTRVMCR
WRDQKPHPVKVIERRKSAASSSPADYEYYVHYTEFNRRLDEWVKLEQLDLDTVEADVDEK
VDDKATSLKMTRHQKRKIDETHVEQGHEELDAASLREHEEFTKVKNIAKIELGKYEIDTW
YFSPFPPEYNDSAKLFFCEFCLNFMKRKEQLQRHMKKCDLKHPPGDEIYRCGTLSMFEVD
GKKNKVYGQNLCYLAKLFLDHKTLYYDVDLFLFYILCECDDRGCHMVGYFSKEKHSEEAY
NLACILTLPPYQRKGYGKFLIAFSYELSKKEGKVGTPERPLSDLGLLSYRGYWTRVLLEI
LKKHKSNISIKELSDMTAIKADDILSTLQSLDLIQYRKGQHVICADPKVLDRHLKAAGRG
GLDVDVSKLIWTPYKEQG
>TraesCS2B02G185300.1
MRVPLSVTNHLDPSKQQEDIPNKAQAQPPNPARTASLPILSDDEMGSMELSTAPENGTAA
AAAACNGGAAPANGGVERRLRSSAASASWAAHLPLEVGTRVMCRWRDQKPHPVKVIERRK
SAASSSPADYEYYVHYTEFNRRLDEWVKLEQLDLDTVEADVDEKVDDKATSLKMTRHQKR
KIDETHVEQGHEELDAASLREHEEFTKVKNIAKIELGKYEIDTWYFSPFPPEYNDSAKLF
FCEFCLNFMKRKEQLQRHMKKCDLKHPPGDEIYRCGTLSMFEVDGKKNKVYGQNLCYLAK
LFLDHKTLYYDVDLFLFYILCECDDRGCHMVGYFSKEKHSEEAYNLACILTLPPYQRKGY
GKFLIAFSYELSKKEGKVGTPERPLSDLGLLSYRGYWTRVLLEILKKHKSNISIKELSDM
TAIKADDILSTLQSLDLIQYRKGQHVICADPKVLDRHLKAAGRGGLDVDVSKLIWTPYKE
QG
>TraesCS2D02G166900.1
MGSMELSTAPENGTAAAAAACNGGAAPANGGVERRLRSSAASASWAAHLPLEVGTRVMCR
WRDQKPHPVKVIERRKSAASSSPADYEYYVHYTEFNRRLDEWVKLEQLDLDTVEADVDEK
VDDKATSLKMTRHQKRKIDETHVEQGHEELDAASLREHEEFTKVKNIAKIELGKYEIDTW
YFSPFPPEYNDSAKLFFCEFCLNFMKRKEQLQRHMKKCDLKHPPGDEIYRCGTLSMFEVD
GKKNKVYGQNLCYLAKLFLDHKTLYYDVDLFLFYILCECDDRGCHMVGYFSKEKHSEEAY
NLACILTLPPYQRKGYGKFLIAFSYELSKKEGKVGTPERPLSDLGLLSYRGYWTRVLLEI
LKKHKSNISIKELSDMTAIKADDILSTLQSLDLIQYRKGQHVICADPKVLDRHLKAAGRG
GLDVDVSKLIWTPYKEQG
>Niben101Scf09485g00002.1
MNLQHMSGQISGQVPSQSGTSLPGLPQQSGNPFSMQMQNPIIHNNMPNMEPEFSKARIFI
SNKIYEYLMQRQQAHEKPPKKVMDIVKRLEEGLFKSASTKEEYLNLNTLENRLHGLIKGL
RMNNHNQRVSRVNSSGPIGTMIPTPGMTQGVNSALIGTSSFDSSMASGSTIASSTVNSGS
FLPMANVSSSGCLTNGYQQPTSNFLVNSGGNNLAPSMSGQRMTSQMIPTPGFNTSCGANL
NSNTSAQSSMSLESPSSIAAFSSVDSTIVSQPLQQNQNSRILHTVGSHVGGGIRSGLQNR
SYGQTGSLNGGLGMIGNNLQLLNGSGASESYIPATTYGNSPKSLPQHFDQQHQPLMQGDR
YGINHADTSGSGNLFHPVSSVGMVMNNQNPRAVSLQSMSKTNSPLITNQSNLTASQQMPN
IKVQPVDQSAQMNFQSQHSLGDNRLSSYQHQHFQQPPQQFQEQRQFVQPQPQQKLQSQQH
QLLSTSNTFAQAQLPSDLGIRVKSESGNHDEAQHSRVNAEQFQFSNINQFQSNSVEDHSK
DAVFQGQWYSTSQDGSQIPGSFSNKQNAQVESCQRTSRKDEAYPNNLSTEGSPVSQPFGN
RAVATNNSSSSICRSNNLPRERQYFNQQRWLLFLIHARGCSAPEGKCPEQNCIKAQKLVK
HMEGCSNFDCQYPRCPTTRVLINHYRRCRDLSCPVCIPVRKFVHAQKKVARPGCSSDMPN
PPNGSCRSYDAGEIASRLTAKLSSVSAQTEDLQPSLKRTKIEPPSQSLILETENCFMPVS
ACESLVTQHAQLVEQHGNAVAMKSEVTDIMIEIPANAVQVSPGSIDIRKDNLDDTCIQKP
VLDSAVASSAASLVKQGNMKTEKDMDQPKQEITSAPSESTSGSKSGKPTIKGVSMTELFT
PEQVREHIIGLRRWVGQSKAKAEKNQAMEHSMSENSCQLCAVEKLNFEPPPIYCTPCGAR
IKRNAMYYTIGTGDTRHYFCIPCYNEARGDTIVVDGTTIPKARMEKKKNDEETEEWWVQC
DKCEAWQHQICALFNGRRNDGGQAEYTCPNCYIIEVERGERKPLPQSAVLGAKDLPRTIL
SDHIEQRLVRRLKHERQERARREGKSYDEVPGAEGLVVRVVSSVDKKLEVKSRFLEIFQE
ENYPPEFPYKSKKIEGVEVCLFGMYVQEFGSECAQPNHRRVYLSYLDSVKYFRPEIKAVS
GEALRTFVYHEILIGYLEYCKKRGFSSCYIWACPPLKGEDYILYCHPEIQKTPKSDKLRE
YLSMLRKALKENIVVDLTNLYDHFFISTGECKAKVTAGRLPYFDGDYWPGAAEDMIYQLQ
QEEDGRKQHKKGSIKKTISKRALKASGQSDLSGNASKDILLMHKLGETISPMKEDFIMVH
LQHACTHCCILMVSGNRWVCNQCKNFQLCDKCYEVEKKLEDRERHPIYHKDTHILYPIEI
EVTEDTKDKDEILESEFFDTRQAFLSLCQGNHYQYDTLRRAKHSSMMVLYHLHNPTAPAF
VTTCNICHLDIEAGQGWRCEVCPDYDVCNACYQKDGGIDHPHKLTNHPSIAERDAQNKEA
RQLRVLQLRKMLDLLVHASQCRSSLCQYPNCRKVKGLFRHGIQCKVRASGGCVLCKKMWY
LLQLHARACKESECHVPRCRDLKEHLRRLQQQSDSRRRAAVMEMMRQRAAEVANSAG
>Niben101Scf08519g01017.1
MNFQHMSGQISGQVPNQSGTSLPGLAQQNGNPFPMQMQNPGAHRTMPNMESEFVKARKHI
SRKIYEYLMRRQQQAQEMQPQRVIDLVKRMEESLFKTASSKEEYLDLSTLEKRLLALTKR
IPMNNHNQQFSQINSSTSIGTMIPTPGMPRSVNSSLIGTSSVDSSVTGGSTIPSSAVNSG
SFMPTTDLPSGSIHGPLANGYQQSTSNFSINSSGNNLVQSMGGQRITSQMIPTPGFSNSN
NSNSNTSIPSYINLESSNSGAAFSGVDSTTVSQPLQQKQHISGQNSRILHTLGSHTGGGI
RSGLQNRSYGQSTAPLNGGLGMVGNNLQHLNGPGASEGYTSATMYGNSPKSLCQHFDQHQ
RPVMQGDRYGISNSETSVSGNLYAPVSSAGTVIGNQSSSAVALQSMSEANSTLMSNQSNL
TASQLMPNLKVQPVDQSEKMNFQSQHYLGDDHLSSRQHQQFHHQHRFAQHLTPQNLQSQH
QQLLLRSNAFGQAHLPSNPXHLTQQKLQSQHQQLLLRSNAFGQSQLPSNPGTQVKSEPEN
HDDAQRSQISAEQFQFSDMQNQFQQSSVGDQSKVLQGQWYPKSHDGSQIPGSFFEPNAQE
ELRQRTSTQEEAQPNNLSTEGSLASQSVANRAVETNNSSSTICRSGNVPRERQYLNQKRW
LLFLIHARRCSAPEGKCPENNCIHAQKLLRHMERCIKFDCPYPRCPETKVLINHHKHCKN
ETCPVCIPVKKFLQAHQKVCARPGYMSDMANSLDGTCRTHDAVETASKFTAKTSPVAFET
PEDLQPSLKRMKIEPSSQPLVLESEKLVPVSAGESNVLQNPLVEQNDAMAMKTADTEVKS
ETLANALHVNPGSTDIPKDSLDDTYTQRPAGDSVASITPACLVNQENVNADKDIDQPKQE
NTSAPSESMSGSKSGKPKIKGVSMMELFTPEQVREHIKGLRQWIGQSKAKAEKNQAMGHS
MSENSCQLCAVEKLTFEPPPIYCTPCGSRLKRNALYYTIGAGDTRHYFCIPCYNEARGDT
IVVDGTTIPKARMEKKRNDEETEEWWVQCDKCEAWQHQICALFNGKRNDGGQAEYTCPNC
YIAEVERGERTPLPQSAVLGAKDLPRTILSDHIEQRLASRLEWERQERAMREGRGYDEVP
GVEGLVVRIVSSVDKKLEVKPRFLEIFQEENYPLEFPYKSKRIEGVEVCLFGMFVQEFGS
ECLQPNHRRVYLSYLDSVKYFRPEIRAVTGEALRTFVYHEILIGYLEYCKKRGFMSCYIW
ACPPLKGEDYILYCHPEIQKTPKSDKLREYLSMLRKAKKENIVADLTNLYDHFFISTGEC
KAKVTAARLPYFDGDYWPGAAEDMIYQLQQEEDGRKQHKKGTIKKTITKRALKASGQSDL
SGNVSKDLLLMHKLGETISPMKEDFIMVHLQHACTHCCVLMVSGNRWECRQCKNFQLCDK
YGSHLYMLRVCEIKEVPHDTKDEDEILESEFFDTRQAFLSLCQGNHYQYDTLRRAKHSSM
MVLYHLHNPTAPAFVTTCYICHLDIETGQGWRCEVCPDYDVCSACYKKDGGIDHPHKLTN
HPSLAERDAQNKEARQLRFLQLKKMLELLVHASQCRYIHCQYPNCRKVKGLFRHGIQCKI
RVSGGCLLCKKMWYLLQLHARACKEFECRVPRCRDLKEHLRRMQQQSDSRRRAAVMEMMR
QRAAEVASGSA
>Niben101Scf09097g01007.1
MNLQHLSGQISGQVPNQSGTSLPGLPQQSGNPFSMQMQNPIIHNNMPNMEPEFSKARIFI
SNKIYEYLMQRQQAHEKPPKKVMDIVKRLEEGLFKSASTKEEYLNLNTLENRLHGLIKGL
RMNNHNQRVSRVNSSGPIGTMIPTRGIAQGVNSALIGTSSFDSSMASGSTIASSTINSGS
FLPMANVSSSGCLTNGYQQPTSNFLVNSGGNNLAPSMSGQRMTSQMIPTPGFNTSCGANM
NSNSSAQSSMSLESPSSIAAFSSVDSTIVSQPLQQNQNSRILHTVGSHVGGGIRSGLQNR
SYGQTGSLNGGLGMIGNNLHLLNGSGASENYIPATTYGNSPKSLPQHFDQQHQPLMQGDR
YGINHADTSGSGNLCLPVSSVGMVMNNQNPRAVSLQSMSKTNSPLITNQSNLTASQQMPN
IKVQPVDQSAQMNFQSQHSLGDNRLSSYQHQHCQQPPQQFQEQRQFVQPQPQQKLQSQQH
QLLSRSNTFAQAQLPSDLVRVKSEPGNHDDAQHSRVNAEQFQFSNMQYFRVNGVPRRKMG
VKYQVASQISKMHKRNRFRELPGRMKLIQIICVQRDLRSVNLLVIEPLPPITRAAPSADL
ITFLVNDXGNRAVATNNSSSSICRSNNLPRERQYFNQQRWLLFLIHARGCSAPEGKCPEQ
NCIKAQKLVKHMEGCSNFDCQYPRCPTTRVLINHYRRCRDLSCPVCIPVRKFVHAQQKVA
RPGCCSDMPNPPNGSCRSYDAGEIASRLTAKLSSVSAQTEDLQPSLKRTKIEPPSQSLIL
ETENSFMPVSTCESLVTQNAQLVEQHGNAVAMKSEVTDIMVEIPANAVQVSPGSIDIRKD
NLDDTCIQKPVLDSAVSSSAASLVKQGNMKTENDMDQPKQEITSAPSESTSGSKSGKPTI
KGVSMTELFTPEQVREHIIGLRRWVGQSKAKAEKNQAMEHSMSENSCQLCAVEKLNFEPP
PIYCTPCGARIKRNAMYYTIGTGDTRHYFCIPCYNEARGDTIVVDGTTIPKARMEKKKND
EETEEWWVQCDKCEAWQHQICALFNGRRNDGGQAEYTCPNCYIVEVERGERKPLPQSAVL
GAKDLPRTILSDHIEQRLVRRLKHERQERARREGKSYDEVPGAEGLVVRIVSSVDKKLEV
KSRFLEIFQEENYPPEFPYKSKKIEGVEVCLFGMYVQEFGSECAQPNHRRVYLSYLDSVK
YFRPEIKAVSGEALRTFVYHEILIGYLEYCKKRGFSSCYIWACPPLKGEDYILYCHPEIQ
KTPKSDKLREYLSMLRKALKENIVVDLTNLYDHFFISTGECKAKVTAARLPYFDGDYWPG
AAEDMIYQLQQEEDGRKQHKKGSIKKTISKRALKASGQSDLSGNASKDILLMHKHACTHC
CILMVSGNRWVCNQCKNFQLCDKCYEVEQKLEDRERHPIYHKDTHMLYPIEIEVTEDTKD
KDEILESEFFDTRQAFLSLCQGNHYQYDTLRRAKHSSMMVLYHLHNPTAPAFVTTCNICH
LDIEAGQGWRCEVCPDYDVCNACYQKDGGIDHPHKLTNHPSIAERDAQNKEARQLRFLQL
RKMLDLLVHASQCRSSLCQYPNCRKVKGLFRHGIQCNVRASGGCVLCKKMWYLLQLHARA
CKESECHVPRCRDLKEHLRRLQQQSDSRRRAAVMEMMRQRAAEVANSAG
>Niben101Scf00377g00001.1
MERCIKFDCPYPRCPETKVLINHHKHCKNENCPVCIPVKKFLQAHQKVCARPGYMSDMAN
SRSGTCRTYDAVETSSKFTAKTSPVAFQTPEDLQPSLKRMKIEPSSQPLVLESENLVPVS
AGESNVLQNGQLVEQNDAVAMKTADTEVKSETLANAVQDNPGSTDIAKDNLDDTYTQRPA
GDSVASSTPACRVKQENVNADKDIDQPKQENTSAPSESMSGSKSGKPKIKGVSMMELFTP
EQVREHIKGLRQWIGQSKAKAEKNQAMEHSMSENSCQLCAVEKLTFEPPPIYCTPCGARL
KRNAMYYTIGAGDTRHYFCIPCYNEARGDTIVVDGTTIPKARMEKKRNDEETEEWWVQCD
KCEAWQHQICALFNGRRNDGGQAEYTCPNCYIAEVERGERTPLPQSAVLGAKDLPRTILS
DHIEQRLASRLEWERQERAMREGRGYDEVPGAEGLVVRIVSSVDKKLEVKPRFLEIFQEE
NYPLEFPYKSKVLLLFQRIEGVEVCLFGMYVQEFGSECLQPNHRRVYLSYLDSVKYFRPE
IRAVTGEALRTFVYHEILIGYLEYCKKRGFTSCYIWACPPLKGEDYILYCHPEIQKTPKS
DKLREWYLSMLRKAKKENIVVDLTNLYDHFFISTGECKAKVTAARLPYFDGDYWPGAAED
MIYQLQQEDDGRKQHKKGTIKKTITKRALKASGQSDLSGNVSKDLLLMHKLGETISPMKE
DFIMVHLQHACTHCCVLMVSGNRWECKQCKNFQLCDKCYETEQRLEDRERHPINQKDKHT
LYPCEIKEVSHDTKDEDEILESEFFDTRQAFLSLCQGNHYQYDTLRRAKHSSMMVLYHLH
NPTAPAFVTTCNICHLDVETGLGWRCEVCPDYDVCNACYKKDGGIDHPHKLTNHPSLAER
DAQNKEARQLRVLQLKKMLELLVHASQCRYLHCQYPNCRKVKGLFRHGIQCKIRVSGGCL
LCKKMWYLLQLHARACKEFECRVPRCRDLKEHLRRMQQQSDSRRRAAVMEMMRQRAAEVA
SGSA
>Niben101Scf06613g05022.1
MASEDHAPPFPSSFSDTRDGALTSNDDLESISARGGGADSESEDDSEEVGDDDEEDYDGS
SMRNFTASRLENSAPSGSGRNSKLKNDNSVKIESSEVMKEGSVTPPTAAAGSVSGAVVKD
ESMKNIFTDNLQTSGAYTAREESLKREEESGRLKFACVSNDGIDEHMIWLIGLKNIFARQ
LPNMPKEYIVRLVMDRSHKSVMVIRRNLVVGGITYRPYGSQKFGEIAFCAITADEQVKGY
GTRLMNHLKQHARDMDGLTHFLTYADNNAVGYFVKQVLDWLLFLGGIIICNRHDQSIQQI
HVYMNVLCLWVL
>Niben101Scf04028g02018.1
MGTKHHSSSSDAIDDPKKRRRVGFAKPDAGIEANECITIYLVSSKEDVDSPNCFCLEPVD
LNHFFEDDGKIFGYQGLKITIWVSLISFHAYADISFESSSDGGRGITDLKSALQNIFAES
LVDEKDTFLQTFSTESHYVRSVVSNAEALQHKVSNGCSTESNCLSKSEPFDAEVFRIVGM
PVGHLYSRLVPLVLLLVDGSNPIDILDPRWEIYLLIQERKDTQEESCSRLLGFAAVYRFH
RYPESKRLRLGQILVLPPYQRKGYGRLLLEVLNRVAISENIYDLTVEEPEDSLQHVRSCI
DVERLLVFDRIQQALDSVVSRLKHENPSKKSYTCKYGPPLSAVEDVRKTLKINKKQFEQC
WEILIYLSLNPIDKYMETYRTIVLHRVKAEVVGKDSEGNGKQVIDVPTEHDQEMSFVMFK
SQNGESSSIEKADNQSIVEEQLQKLVDERLNQIKLIAEKVSVHRQ
>Niben101Scf03307g08018.1
MGTKHHSSSSDPIDDPKKRRRVGFAKPDAGIEANECITLYLVSRKEDVDSPNSFCVEPVD
LNHFFEDDGKIFGYQGLKITIWVSLISFHAYADISFESSSDGGRGITDLNSALQLLGRQR
IFLLSLVDEKDAFLQTFSTESHYVRSVVSNAEALQHEVSNGCRTESNCLSKSGPFDAEVF
RIVGMPVGHIYSRLVPLVLLLVDNGNPIDILDPRWEIYLLIQERKDIQEEIHSRLLGFAA
IYRFHRYPECKRLRLGQILVLPPYQLKGGRFLLEVLNRVAISENVYDLTVEEPEDSLQHV
RSRIDVERLLVFDPIQQALDSVVSRLNHENPSKKSYTCKYGPPLSAVEDVRKTLKINKKQ
FEQCWEILIYLSLNPIDKYMETYRTIVLYRVKAEVVGKDSEGNGKQVIDIPIEYDQDMSF
VMFQSQNGESSSIEKADNQSNLEEQLQKLVDERLDQIKLIAEKVSVHRQ
>Niben101Scf25141g00001.1
MGSIDTSTRAESGSDPIPTPNSTANGHPAGNGSVHPPAVESTGASAENEPFRKRKGSGVL
PLEVGTRVMCRWRDGKYHPVKVIERRKLPCGGANDYEYYVHYTEFNRRLDEWVKLEQLDL
NSVETVVDEKVEDKVTSLKMTRHQKRKIDETHVEGHEELDAASLREHEEFTKVKNIATIE
LGRYEIETWYFSPFPPEYNDCSKLFFCECCLNFMKRKEQLQRHMRKCDLKHPPGDEIYRS
GTLSMFEVDGKKNKVYGQNLCYLAKLFLDHKTLYYDVDLFLFYVLCECDDRGCHMVGYFS
KEKHSEESYNLACILTLPPYQRKGYGKFLIAFSYELSKKEGKVGTPERPLSDLGMLSYRG
YWTRVLLDILKKHKGNISIKELSDMTAIKAEDILSTLQGLELIQYRKGQHVICADPKVLD
RHLKAAGRGGLDVDVSKLIWTPYKEQNXXXXXXXXXXXXXXXXXXXXXXXXXAEEAIKAE
DILSTLQGLELIQYRKGQHVICADPKVLDRHLKAAGRGGLDVDGLVCNDFSDKSLLVLLL
LSVANGLGALRPLCSFTIYWCGGTVDDGLYYVDLKVDSEERKEVAV
>Niben101Scf00962g02008.1
MKRKEQLQRHMRKCDLKHPPGDEIYRSGTLSMFEVDGKKNKVYGQNLCYLAKLFLDHKTL
YYDVDLFLFYVLCECDDRGCHMVGYFSKEKHSEESYNLACILTLPPYQRKGYGKFLIAFS
YELSKKEGKVGTPERPLSDLGMLSYRGYWMRVLLDILKKHKGNISIKELSDMTAIKAEDI
LSTLQGLELIQYRKGQHVICADPKVLDRHLKAAGRGGLDVDVSKLIWTPYKEQN
