# Supplementary material for: Regulation of Disease-Resistance Genes against CWMV Infection by NbHAG1-Mediated H3K36ac
Source: Int J Mol Sci. 2024 Feb 28;25(5):2800. doi: 10.3390/ijms25052800 (PMC10931728; doi:10.3390/ijms25052800)
Supplement: Supplementary file 1 [file ijms-25-02800-s001.zip › ijms-2871725-supplementary/Table S2. LC-MS MS of CRISPR HAG1 VS Nb.xls]

## Sheet: Proteins
Table S2. LC-MS/MS of CRISPR HAG1 VS Nb
Checked	Protein FDR Confidence: Sequest HT	Master	Accession	Description	Exp. q-value: Sequest HT	Coverage [%]	# Peptides	# PSMs	# Unique Peptides	# AAs	MW [kDa]	calc. pI	Score Sequest HT: Sequest HT	# Peptides (by Search Engine): Sequest HT	# Razor Peptides	Abundance Ratio: (C) / (N)	Abundance Ratio Variability [%]: (C) / (N)	Abundances (Grouped): C	Abundances (Grouped): N	Abundances (Grouped) CV [%]: C	Abundances (Grouped) CV [%]: N	Abundance: F7: Sample, C	Abundance: F8: Sample, C	Abundance: F9: Sample, C	Abundance: F1: Sample, N	Abundance: F2: Sample, N	Abundance: F3: Sample, N	Abundances (Normalized): F7: Sample, C	Abundances (Normalized): F8: Sample, C	Abundances (Normalized): F9: Sample, C	Abundances (Normalized): F1: Sample, N	Abundances (Normalized): F2: Sample, N	Abundances (Normalized): F3: Sample, N	Found in Sample: F7: Sample, C	Found in Sample: F8: Sample, C	Found in Sample: F9: Sample, C	Found in Sample: F1: Sample, N	Found in Sample: F2: Sample, N	Found in Sample: F3: Sample, N	# Protein Groups	Modifications
FALSE	High	Master Protein	H3	H3	0	72	29	404	29	136	15.4	11.15	199.87	29	0	1.091	52	100	100	0	0	1.19169e+09	1.58763e+09	1.16693e+09	2.17901e+09	2.03334e+09	1.8903e+09	2.17901e+09	2.17901e+09	2.17901e+09	2.17901e+09	2.17901e+09	2.17901e+09	High	High	High	High	High	High	1	Acetylation [K5; K10; K15; K19; K24; K28; K37; K38; K57; K65; K123]
	Checked	Confidence	Annotated Sequence	Modifications	# Protein Groups	# Proteins	# PSMs	Master Protein Accessions	Positions in Master Proteins	Modifications in Master Proteins	# Missed Cleavages	Theo. MH+ [Da]	Abundance Ratio: (C) / (N)	Abundance Ratio Variability [%]: (C) / (N)	Abundances (Grouped): C	Abundances (Grouped): N	Abundances (Grouped) CV [%]: C	Abundances (Grouped) CV [%]: N	Abundance: F7: Sample, C	Abundance: F8: Sample, C	Abundance: F9: Sample, C	Abundance: F1: Sample, N	Abundance: F2: Sample, N	Abundance: F3: Sample, N	Abundances (Normalized): F7: Sample, C	Abundances (Normalized): F8: Sample, C	Abundances (Normalized): F9: Sample, C	Abundances (Normalized): F1: Sample, N	Abundances (Normalized): F2: Sample, N	Abundances (Normalized): F3: Sample, N	Quan Info	Found in Sample: F7: Sample, C	Found in Sample: F8: Sample, C	Found in Sample: F9: Sample, C	Found in Sample: F1: Sample, N	Found in Sample: F2: Sample, N	Found in Sample: F3: Sample, N	Confidence (by Search Engine): Sequest HT	XCorr (by Search Engine): Sequest HT	Top Apex RT [min]
	FALSE	High	[K].RVTIMPKDIQLAR.[R]		1	1	15	H3	H3 [117-129]		2	1540.9	2.58	8.44	180.6	70	13.74	11.51	7.20469e+06	7.74381e+06	7.45668e+06	5.10616e+06	5.0302e+06	3.72763e+06	1.31738e+07	1.06283e+07	1.39239e+07	5.10616e+06	5.39057e+06	4.29696e+06		High	Peak Found	Peak Found	High	High	High	High	3.01	20.94
		Checked	Confidence	Identifying Node	PSM Ambiguity	Annotated Sequence	Modifications	# Proteins	Master Protein Accessions	Protein Accessions	# Missed Cleavages	Charge	DeltaScore	Rank	m/z [Da]	Theo. MH+ [Da]	DeltaM [ppm]	Intensity	Activation Type	NCE [%]	MS Order	RT [min]	First Scan	Spectrum File	File ID	Quan Info	XCorr
		FALSE	High	Sequest HT (A4)	Unambiguous	[K].RVTIMPKDIQLAR.[R]		1	H3	H3	2	3	0.8771	1	514.296	1540.9	-16.79	773507	HCD (High Energy Collision Dissociation)	30	MS2	20.9482	6826	Yang-E-1-20230914.raw	F6		3.01
		FALSE	High	Sequest HT (A4)	Unambiguous	[K].RVTIMPKDIQLAR.[R]		1	H3	H3	2	3	0.8758	1	514.297	1540.9	-14.53	9805235	HCD (High Energy Collision Dissociation)	30	MS2	20.9994	8223	Yang-C-3-20230914.raw	F7		2.98
		FALSE	High	Sequest HT (A4)	Unambiguous	[K].RVTIMPKDIQLAR.[R]		1	H3	H3	2	3	0.8791	1	514.296	1540.9	-16.79	3.97443e+06	HCD (High Energy Collision Dissociation)	30	MS2	20.9895	8851	Yang-N-1-20230914.raw	F3		2.73
		FALSE	High	Sequest HT (A4)	Unambiguous	[K].RVTIMPKDIQLAR.[R]		1	H3	H3	2	3	0.8787	1	514.297	1540.9	-15	159702	HCD (High Energy Collision Dissociation)	30	MS2	20.8151	8127	Yang-C-3-20230914.raw	F7		2.72
		FALSE	High	Sequest HT (A4)	Unambiguous	[K].RVTIMPKDIQLAR.[R]		1	H3	H3	2	3	0.8911	1	514.296	1540.9	-17.5	28249.2	HCD (High Energy Collision Dissociation)	30	MS2	20.909	6780	Yang-E-2-20230914.raw	F5		2.57
		FALSE	High	Sequest HT (A4)	Unambiguous	[K].RVTIMPKDIQLAR.[R]		1	H3	H3	2	3	0.8419	1	514.295	1540.9	-18.09	138336	HCD (High Energy Collision Dissociation)	30	MS2	20.8322	8774	Yang-N-1-20230914.raw	F3		2.53
		FALSE	High	Sequest HT (A4)	Unambiguous	[K].RVTIMPKDIQLAR.[R]		1	H3	H3	2	3	0.8492	1	514.296	1540.9	-16.91	2322925	HCD (High Energy Collision Dissociation)	30	MS2	20.9414	8794	Yang-N-3-20230914.raw	F1		2.52
		FALSE	High	Sequest HT (A4)	Unambiguous	[K].RVTIMPKDIQLAR.[R]		1	H3	H3	2	3	0.8571	1	514.297	1540.9	-15.48	90596.2	HCD (High Energy Collision Dissociation)	30	MS2	21.4665	8460	Yang-C-3-20230914.raw	F7		2.52
		FALSE	High	Sequest HT (A4)	Unambiguous	[K].RVTIMPKDIQLAR.[R]		1	H3	H3	2	3	0.8319	1	514.294	1540.9	-19.76	77511.5	HCD (High Energy Collision Dissociation)	30	MS2	20.8544	8750	Yang-N-3-20230914.raw	F1		2.32
		FALSE	High	Sequest HT (A4)	Unambiguous	[K].RVTIMPKDIQLAR.[R]		1	H3	H3	2	3	0.8411	1	514.295	1540.9	-19.16	5089943	HCD (High Energy Collision Dissociation)	30	MS2	21.0003	8823	Yang-N-3-20230914.raw	F1		2.14
		FALSE	High	Sequest HT (A4)	Unambiguous	[K].RVTIMPKDIQLAR.[R]		1	H3	H3	2	3	0.8224	1	514.295	1540.9	-19.4	72711.7	HCD (High Energy Collision Dissociation)	30	MS2	20.7957	8633	Yang-N-2-20230914.raw	F2		2.14
		FALSE	High	Sequest HT (A4)	Unambiguous	[K].RVTIMPKDIQLAR.[R]		1	H3	H3	2	3	0.8088	1	514.295	1540.9	-18.69	76470.9	HCD (High Energy Collision Dissociation)	30	MS2	21.4508	9072	Yang-N-1-20230914.raw	F3		2.04
		FALSE	High	Sequest HT (A4)	Unambiguous	[K].RVTIMPKDIQLAR.[R]		1	H3	H3	2	3	0.7764	1	514.294	1540.9	-19.88	33265.2	HCD (High Energy Collision Dissociation)	30	MS2	21.5738	9105	Yang-N-3-20230914.raw	F1		1.61
		FALSE	High	Sequest HT (A4)	Unambiguous	[K].RVTIMPKDIQLAR.[R]		1	H3	H3	2	3	0.7517	1	514.297	1540.9	-14.89	26598.3	HCD (High Energy Collision Dissociation)	30	MS2	21.7466	9086	Yang-N-2-20230914.raw	F2		1.49
		FALSE	High	Sequest HT (A4)	Unambiguous	[K].RVTIMPKDIQLAR.[R]		1	H3	H3	2	3	0.6277	1	514.302	1540.9	-5.02	35128.5	HCD (High Energy Collision Dissociation)	30	MS2	21.334	8393	Yang-C-3-20230914.raw	F7		1.37
	FALSE	High	[R].KSAPTTGGVKKPHR.[Y]	1xAcetylation [K]	1	1	29	H3	H3 [28-41]	H3 1xAcetylation [K37]	2	1505.85	0.462	79.37	58.8	127.2	34.07	64.12	1.25532e+06	3.32609e+06	2403854	18415353	4280978	8.42147e+06	2.29536e+06	4.56504e+06	4.48874e+06	18415353	4.58768e+06	9.70771e+06		High	High	High	High	High	High	High	3.01	9.64
		Checked	Confidence	Identifying Node	PSM Ambiguity	Annotated Sequence	Modifications	# Proteins	Master Protein Accessions	Protein Accessions	# Missed Cleavages	Charge	DeltaScore	Rank	m/z [Da]	Theo. MH+ [Da]	DeltaM [ppm]	Intensity	Activation Type	NCE [%]	MS Order	RT [min]	First Scan	Spectrum File	File ID	Quan Info	XCorr
		FALSE	High	Sequest HT (A4)	Unambiguous	[R].KSAPTTGGVkKPHR.[Y]	K10(Acetyla)	1	H3	H3	2	3	0.1595	1	502.624	1505.85	2.73	323420	HCD (High Energy Collision Dissociation)	30	MS2	9.7889	2791	Yang-C-1-20230914.raw	F9		3.01
		FALSE	High	Sequest HT (A4)	Unambiguous	[R].KSAPTTGGVkKPHR.[Y]	K10(Acetyla)	1	H3	H3	2	4	0.1246	1	377.22	1505.85	2.72	4.39195e+06	HCD (High Energy Collision Dissociation)	30	MS2	9.7735	2778	Yang-C-1-20230914.raw	F9		2.81
		FALSE	High	Sequest HT (A4)	Unambiguous	[R].KSAPTTGGVkKPHR.[Y]	K10(Acetyla)	1	H3	H3	2	3	0.1234	1	502.625	1505.85	4.8	133849	HCD (High Energy Collision Dissociation)	30	MS2	9.5424	3108	Yang-N-2-20230914.raw	F2		2.35
		FALSE	High	Sequest HT (A4)	Unambiguous	[R].KSAPTTGGVkKPHR.[Y]	K10(Acetyla)	1	H3	H3	2	4	0.1894	1	377.22	1505.85	3.45	1.12063e+06	HCD (High Energy Collision Dissociation)	30	MS2	9.8672	2837	Yang-C-1-20230914.raw	F9		2.27
		FALSE	High	Sequest HT (A4)	Unambiguous	[R].KSAPTTGGVkKPHR.[Y]	K10(Acetyla)	1	H3	H3	2	4	0.2027	1	377.22	1505.85	3.53	170143	HCD (High Energy Collision Dissociation)	30	MS2	9.7873	3301	Yang-N-3-20230914.raw	F1		2.22
		FALSE	High	Sequest HT (A4)	Unambiguous	[R].KSAPTTGGVkKPHR.[Y]	K10(Acetyla)	1	H3	H3	2	4	0.0829	1	377.222	1505.85	8.56	63164.3	HCD (High Energy Collision Dissociation)	30	MS2	9.6508	2118	Yang-E-1-20230914.raw	F6		2.17
		FALSE	High	Sequest HT (A4)	Unambiguous	[R].KSAPTTGGVkKPHR.[Y]	K10(Acetyla)	1	H3	H3	2	4	0.1905	1	377.224	1505.85	14.15	407120	HCD (High Energy Collision Dissociation)	30	MS2	9.6344	2148	Yang-E-3-20230914.raw	F4		2.1
		FALSE	High	Sequest HT (A4)	Unambiguous	[R].KSAPTTGGVkKPHR.[Y]	K10(Acetyla)	1	H3	H3	2	4	0.2222	1	377.224	1505.85	12.37	451268	HCD (High Energy Collision Dissociation)	30	MS2	9.8195	2858	Yang-C-3-20230914.raw	F7		2.07
		FALSE	High	Sequest HT (A4)	Unambiguous	[R].KSAPTTGGVKkPHR.[Y]	K11(Acetyla)	1	H3	H3	2	3	0.1748	1	502.616	1505.85	-15.08	15615	HCD (High Energy Collision Dissociation)	30	MS2	9.5424	3108	Yang-N-2-20230914.raw	F2		2.06
		FALSE	High	Sequest HT (A4)	Unambiguous	[R].KSAPTTGGVkKPHR.[Y]	K10(Acetyla)	1	H3	H3	2	4	0.198	1	377.221	1505.85	6.21	108049	HCD (High Energy Collision Dissociation)	30	MS2	9.4505	2808	Yang-C-2-20230914.raw	F8		1.97
		FALSE	High	Sequest HT (A4)	Unambiguous	[R].KSAPTTGGVkKPHR.[Y]	K10(Acetyla)	1	H3	H3	2	4	0.173	1	377.222	1505.85	8.8	2963336	HCD (High Energy Collision Dissociation)	30	MS2	9.5371	3102	Yang-N-2-20230914.raw	F2		1.85
		FALSE	High	Sequest HT (A4)	Unambiguous	[R].KSAPTTGGVkKPHR.[Y]	K10(Acetyla)	1	H3	H3	2	3	0.087	1	502.627	1505.85	7.47	116647	HCD (High Energy Collision Dissociation)	30	MS2	9.7483	2168	Yang-E-1-20230914.raw	F6		1.84
		FALSE	High	Sequest HT (A4)	Unambiguous	[R].KSAPTTGGVkKPHR.[Y]	K10(Acetyla)	1	H3	H3	2	3	0.0667	1	502.628	1505.85	10.39	117249	HCD (High Energy Collision Dissociation)	30	MS2	9.6894	2176	Yang-E-3-20230914.raw	F4		1.8
		FALSE	High	Sequest HT (A4)	Unambiguous	[R].KSAPTTGGVkKPHR.[Y]	K10(Acetyla)	1	H3	H3	2	4	0.1778	1	377.223	1505.85	10.83	959447	HCD (High Energy Collision Dissociation)	30	MS2	9.7255	2815	Yang-C-3-20230914.raw	F7		1.8
		FALSE	High	Sequest HT (A4)	Unambiguous	[R].KSAPTTGGVkKPHR.[Y]	K10(Acetyla)	1	H3	H3	2	4	0.1453	1	377.222	1505.85	8.56	2966908	HCD (High Energy Collision Dissociation)	30	MS2	9.8237	2291	Yang-E-2-20230914.raw	F5		1.79
		FALSE	High	Sequest HT (A4)	Unambiguous	[R].KSAPTTGGVkKPHR.[Y]	K10(Acetyla)	1	H3	H3	2	3	0.1029	1	502.627	1505.85	8.75	770939	HCD (High Energy Collision Dissociation)	30	MS2	9.5527	3158	Yang-N-1-20230914.raw	F3		1.75
		FALSE	High	Sequest HT (A4)	Unambiguous	[R].KSAPTTGGVkKPHR.[Y]	K10(Acetyla)	1	H3	H3	2	4	0.2706	1	377.221	1505.85	6.21	108049	HCD (High Energy Collision Dissociation)	30	MS2	9.4698	2829	Yang-C-2-20230914.raw	F8		1.7
		FALSE	High	Sequest HT (A4)	Unambiguous	[R].KSAPTTGGVkKPHR.[Y]	K10(Acetyla)	1	H3	H3	2	4	0.0592	1	377.222	1505.85	7.67	4.27416e+06	HCD (High Energy Collision Dissociation)	30	MS2	9.6325	3217	Yang-N-1-20230914.raw	F3		1.69
		FALSE	High	Sequest HT (A4)	Unambiguous	[R].KSAPTTGGVkKPHR.[Y]	K10(Acetyla)	1	H3	H3	2	4	0.1845	1	377.22	1505.85	3.45	21783804	HCD (High Energy Collision Dissociation)	30	MS2	9.6648	3227	Yang-N-3-20230914.raw	F1		1.68
		FALSE	High	Sequest HT (A4)	Unambiguous	[R].KSAPTTGGVkKPHR.[Y]	K10(Acetyla)	1	H3	H3	2	3	0.1012	1	502.628	1505.85	9.78	247944	HCD (High Energy Collision Dissociation)	30	MS2	9.8333	2296	Yang-E-2-20230914.raw	F5		1.68
		FALSE	High	Sequest HT (A4)	Unambiguous	[R].KSAPTTGGVkKPHR.[Y]	K10(Acetyla)	1	H3	H3	2	4	0.0123	1	377.221	1505.85	4.75	8.19033e+06	HCD (High Energy Collision Dissociation)	30	MS2	9.6921	3246	Yang-N-3-20230914.raw	F1		1.63
		FALSE	High	Sequest HT (A4)	Unambiguous	[R].KSAPTTGGVKkPHR.[Y]	K11(Acetyla)	1	H3	H3	2	4	0.2893	1	377.215	1505.85	-9.84	211783	HCD (High Energy Collision Dissociation)	30	MS2	9.6325	3217	Yang-N-1-20230914.raw	F3		1.59
		FALSE	High	Sequest HT (A4)	Unambiguous	[R].KSAPTTGGVkKPHR.[Y]	K10(Acetyla)	1	H3	H3	2	4	0.1818	1	377.222	1505.85	7.26	1196244	HCD (High Energy Collision Dissociation)	30	MS2	9.6023	3150	Yang-N-2-20230914.raw	F2		1.54
		FALSE	High	Sequest HT (A4)	Unambiguous	[R].KSAPTTGGVkKPHR.[Y]	K10(Acetyla)	1	H3	H3	2	4	0.1156	1	377.222	1505.85	7.34	56484.9	HCD (High Energy Collision Dissociation)	30	MS2	9.8972	2328	Yang-E-2-20230914.raw	F5		1.47
		FALSE	High	Sequest HT (A4)	Unambiguous	[R].KSAPTTGGVkKPHR.[Y]	K10(Acetyla)	1	H3	H3	2	4	0.0486	1	377.212	1505.85	-19.16	68130.3	HCD (High Energy Collision Dissociation)	30	MS2	9.621	2104	Yang-E-1-20230914.raw	F6		1.44
		FALSE	High	Sequest HT (A4)	Unambiguous	[R].KSAPTTGGVkKPHR.[Y]	K10(Acetyla)	1	H3	H3	2	4	0.2199	1	377.222	1505.85	8.23	739850	HCD (High Energy Collision Dissociation)	30	MS2	9.6666	3236	Yang-N-1-20230914.raw	F3		1.41
		FALSE	High	Sequest HT (A4)	Unambiguous	[R].KSAPTTGGVkKPHR.[Y]	K10(Acetyla)	1	H3	H3	2	4	0.0429	1	377.22	1505.85	3.13	18419992	HCD (High Energy Collision Dissociation)	30	MS2	9.676	3235	Yang-N-3-20230914.raw	F1		1.4
		FALSE	High	Sequest HT (A4)	Unambiguous	[R].KSAPTTGGVkKPHR.[Y]	K10(Acetyla)	1	H3	H3	2	4	0.2481	1	377.222	1505.85	7.91	180768	HCD (High Energy Collision Dissociation)	30	MS2	9.6824	3245	Yang-N-1-20230914.raw	F3		1.29
		FALSE	High	Sequest HT (A4)	Unambiguous	[R].KSAPTTGGVkKPHR.[Y]	K10(Acetyla)	1	H3	H3	2	4	0.1905	1	377.225	1505.85	14.72	30981.1	HCD (High Energy Collision Dissociation)	30	MS2	9.7791	2218	Yang-E-3-20230914.raw	F4		1.26
	FALSE	High	[K].RVTIMPKDIQLAR.[R]	1xAcetylation [K7]	1	1	2	H3	H3 [117-129]	H3 1xAcetylation [K123]	2	1582.91	1.486	20.69	123	82.8	47.77	5.08	447155	1.37314e+06	508870	629955	645371	554693	817627	1.88463e+06	950217	629955	691607	639413		High	Peak Found	Peak Found	Peak Found	Peak Found	Peak Found	High	3	26.92
		Checked	Confidence	Identifying Node	PSM Ambiguity	Annotated Sequence	Modifications	# Proteins	Master Protein Accessions	Protein Accessions	# Missed Cleavages	Charge	DeltaScore	Rank	m/z [Da]	Theo. MH+ [Da]	DeltaM [ppm]	Intensity	Activation Type	NCE [%]	MS Order	RT [min]	First Scan	Spectrum File	File ID	Quan Info	XCorr
		FALSE	High	Sequest HT (A4)	Unambiguous	[K].RVTIMPkDIQLAR.[R]	K7(Acetyla)	1	H3	H3	2	3	0.8633	1	528.299	1582.91	-17.12	56113.3	HCD (High Energy Collision Dissociation)	30	MS2	26.8819	11147	Yang-C-3-20230914.raw	F7		3
		FALSE	High	Sequest HT (A4)	Unambiguous	[K].RVTIMPkDIQLAR.[R]	K7(Acetyla)	1	H3	H3	2	3	0.8736	1	528.299	1582.91	-16.54	551103	HCD (High Energy Collision Dissociation)	30	MS2	26.9899	11204	Yang-C-3-20230914.raw	F7		2.69
	FALSE	High	[R].LVREIAQDFK.[T]		1	1	11	H3	H3 [71-80]		1	1218.68	1.109	9.78	100.6	90.5	24.75	4.23	2.43098e+06	2.04303e+06	2.42358e+06	3.75847e+06	3.73194e+06	3.5386e+06	4.44507e+06	2.80405e+06	4.52556e+06	3.75847e+06	3.9993e+06	4.07906e+06		High	Peak Found	Peak Found	High	Peak Found	High	High	2.74	19.37
		Checked	Confidence	Identifying Node	PSM Ambiguity	Annotated Sequence	Modifications	# Proteins	Master Protein Accessions	Protein Accessions	# Missed Cleavages	Charge	DeltaScore	Rank	m/z [Da]	Theo. MH+ [Da]	DeltaM [ppm]	Intensity	Activation Type	NCE [%]	MS Order	RT [min]	First Scan	Spectrum File	File ID	Quan Info	XCorr
		FALSE	High	Sequest HT (A4)	Unambiguous	[R].LVREIAQDFK.[T]		1	H3	H3	1	3	1	1	406.892	1218.68	-19.72	474846	HCD (High Energy Collision Dissociation)	30	MS2	19.2279	7933	Yang-N-3-20230914.raw	F1		2.74
		FALSE	High	Sequest HT (A4)	Unambiguous	[R].LVREIAQDFK.[T]		1	H3	H3	1	3	1	1	406.892	1218.68	-18.14	294958	HCD (High Energy Collision Dissociation)	30	MS2	19.2991	8013	Yang-N-1-20230914.raw	F3		2.69
		FALSE	High	Sequest HT (A4)	Unambiguous	[R].LVREIAQDFK.[T]		1	H3	H3	1	3	1	1	406.893	1218.68	-15.21	1.3126e+06	HCD (High Energy Collision Dissociation)	30	MS2	19.3514	7385	Yang-C-3-20230914.raw	F7		2.67
		FALSE	High	Sequest HT (A4)	Unambiguous	[R].LVREIAQDFK.[T]		1	H3	H3	1	3	1	1	406.893	1218.68	-15.81	2.76975e+06	HCD (High Energy Collision Dissociation)	30	MS2	19.3788	7399	Yang-C-3-20230914.raw	F7		2.61
		FALSE	High	Sequest HT (A4)	Unambiguous	[R].LVREIAQDFK.[T]		1	H3	H3	1	3	1	1	406.892	1218.68	-18.14	294958	HCD (High Energy Collision Dissociation)	30	MS2	19.3229	8027	Yang-N-1-20230914.raw	F3		2.53
		FALSE	High	Sequest HT (A4)	Unambiguous	[R].LVREIAQDFK.[T]		1	H3	H3	1	3	1	1	406.892	1218.68	-18.14	90808	HCD (High Energy Collision Dissociation)	30	MS2	19.3485	6081	Yang-E-1-20230914.raw	F6		2.53
		FALSE	High	Sequest HT (A4)	Unambiguous	[R].LVREIAQDFK.[T]		1	H3	H3	1	3	1	1	406.894	1218.68	-13.26	70539.9	HCD (High Energy Collision Dissociation)	30	MS2	17.4148	6446	Yang-C-3-20230914.raw	F7		2.29
		FALSE	High	Sequest HT (A4)	Unambiguous	[R].LVREIAQDFK.[T]		1	H3	H3	1	3	1	1	406.892	1218.68	-18.14	25644.7	HCD (High Energy Collision Dissociation)	30	MS2	18.5138	7621	Yang-N-1-20230914.raw	F3		1.78
		FALSE	High	Sequest HT (A4)	Unambiguous	[R].LVREIAQDFK.[T]		1	H3	H3	1	3	1	1	406.892	1218.68	-18.97	396030	HCD (High Energy Collision Dissociation)	30	MS2	19.5532	6184	Yang-E-1-20230914.raw	F6		1.75
		FALSE	High	Sequest HT (A4)	Unambiguous	[R].LVREIAQDFK.[T]		1	H3	H3	1	3	1	1	406.891	1218.68	-19.94	88172.7	HCD (High Energy Collision Dissociation)	30	MS2	17.3544	7033	Yang-N-1-20230914.raw	F3		1.37
		FALSE	High	Sequest HT (A4)	Unambiguous	[R].LVREIAQDFK.[T]		1	H3	H3	1	3	1	1	406.894	1218.68	-13.78	54473.1	HCD (High Energy Collision Dissociation)	30	MS2	19.6801	7554	Yang-C-3-20230914.raw	F7		1.31
	FALSE	High	[R].VTIMPKDIQLAR.[R]		1	1	19	H3	H3 [118-129]		1	1384.8	1.775	17.77	145.1	81.7	12.61	21.08	4.95889e+06	8.05994e+06	4.74178e+06	4.90548e+06	4.76593e+06	6.14151e+06	9.06737e+06	1.10622e+07	8.85435e+06	4.90548e+06	5.10737e+06	7.07953e+06		High	High	High	High	High	High	High	2.72	23.63
		Checked	Confidence	Identifying Node	PSM Ambiguity	Annotated Sequence	Modifications	# Proteins	Master Protein Accessions	Protein Accessions	# Missed Cleavages	Charge	DeltaScore	Rank	m/z [Da]	Theo. MH+ [Da]	DeltaM [ppm]	Intensity	Activation Type	NCE [%]	MS Order	RT [min]	First Scan	Spectrum File	File ID	Quan Info	XCorr
		FALSE	High	Sequest HT (A4)	Unambiguous	[R].VTIMPKDIQLAR.[R]		1	H3	H3	1	3	1	1	462.265	1384.8	-12.24	96028	HCD (High Energy Collision Dissociation)	30	MS2	23.5683	9508	Yang-C-3-20230914.raw	F7		2.72
		FALSE	High	Sequest HT (A4)	Unambiguous	[R].VTIMPKDIQLAR.[R]		1	H3	H3	1	3	1	1	462.262	1384.8	-18.85	58468.6	HCD (High Energy Collision Dissociation)	30	MS2	23.5427	10075	Yang-N-1-20230914.raw	F3		2.31
		FALSE	High	Sequest HT (A4)	Unambiguous	[R].VTIMPKDIQLAR.[R]		1	H3	H3	1	3	1	1	462.266	1384.8	-9.6	770376	HCD (High Energy Collision Dissociation)	30	MS2	23.7728	9608	Yang-C-3-20230914.raw	F7		2.23
		FALSE	High	Sequest HT (A4)	Unambiguous	[R].VTIMPKDIQLAR.[R]		1	H3	H3	1	3	1	1	462.263	1384.8	-17.93	739117	HCD (High Energy Collision Dissociation)	30	MS2	23.7675	10185	Yang-N-3-20230914.raw	F1		2.09
		FALSE	High	Sequest HT (A4)	Unambiguous	[R].VTIMPKDIQLAR.[R]		1	H3	H3	1	3	1	1	462.262	1384.8	-18.45	4.66556e+06	HCD (High Energy Collision Dissociation)	30	MS2	23.6999	10152	Yang-N-3-20230914.raw	F1		2.03
		FALSE	High	Sequest HT (A4)	Unambiguous	[R].VTIMPKDIQLAR.[R]		1	H3	H3	1	3	1	1	462.263	1384.8	-16.67	4.60913e+06	HCD (High Energy Collision Dissociation)	30	MS2	23.7085	10154	Yang-N-1-20230914.raw	F3		2
		FALSE	High	Sequest HT (A4)	Unambiguous	[R].VTIMPKDIQLAR.[R]		1	H3	H3	1	3	1	1	462.262	1384.8	-18.65	28321	HCD (High Energy Collision Dissociation)	30	MS2	23.568	9970	Yang-N-2-20230914.raw	F2		1.92
		FALSE	High	Sequest HT (A4)	Unambiguous	[R].VTIMPKDIQLAR.[R]		1	H3	H3	1	3	1	1	462.263	1384.8	-17.99	34900.7	HCD (High Energy Collision Dissociation)	30	MS2	23.5389	9956	Yang-N-2-20230914.raw	F2		1.91
		FALSE	High	Sequest HT (A4)	Unambiguous	[R].VTIMPKDIQLAR.[R]		1	H3	H3	1	3	1	1	462.266	1384.8	-10.06	113094	HCD (High Energy Collision Dissociation)	30	MS2	23.8423	9642	Yang-C-3-20230914.raw	F7		1.91
		FALSE	High	Sequest HT (A4)	Unambiguous	[R].VTIMPKDIQLAR.[R]		1	H3	H3	1	3	1	1	462.262	1384.8	-18.19	5143094	HCD (High Energy Collision Dissociation)	30	MS2	23.7272	10048	Yang-N-2-20230914.raw	F2		1.91
		FALSE	High	Sequest HT (A4)	Unambiguous	[R].VTIMPKDIQLAR.[R]		1	H3	H3	1	3	1	1	462.262	1384.8	-19.18	25305.9	HCD (High Energy Collision Dissociation)	30	MS2	23.5341	7897	Yang-E-3-20230914.raw	F4		1.84
		FALSE	High	Sequest HT (A4)	Unambiguous	[R].VTIMPKDIQLAR.[R]		1	H3	H3	1	3	1	1	462.263	1384.8	-17.2	212903	HCD (High Energy Collision Dissociation)	30	MS2	23.7978	9730	Yang-C-1-20230914.raw	F9		1.82
		FALSE	High	Sequest HT (A4)	Unambiguous	[R].VTIMPKDIQLAR.[R]		1	H3	H3	1	3	1	1	462.262	1384.8	-18.92	1.0956e+06	HCD (High Energy Collision Dissociation)	30	MS2	23.6977	7962	Yang-E-3-20230914.raw	F4		1.7
		FALSE	High	Sequest HT (A4)	Unambiguous	[R].VTIMPKDIQLAR.[R]		1	H3	H3	1	3	1	1	462.263	1384.8	-17.33	22757.3	HCD (High Energy Collision Dissociation)	30	MS2	23.514	7949	Yang-E-1-20230914.raw	F6		1.68
		FALSE	High	Sequest HT (A4)	Unambiguous	[R].VTIMPKDIQLAR.[R]		1	H3	H3	1	3	1	1	462.262	1384.8	-19.51	31387.5	HCD (High Energy Collision Dissociation)	30	MS2	23.5293	10068	Yang-N-3-20230914.raw	F1		1.48
		FALSE	High	Sequest HT (A4)	Unambiguous	[R].VTIMPKDIQLAR.[R]		1	H3	H3	1	3	1	1	462.262	1384.8	-19.38	229243	HCD (High Energy Collision Dissociation)	30	MS2	23.726	7969	Yang-E-3-20230914.raw	F4		1.38
		FALSE	High	Sequest HT (A4)	Unambiguous	[R].VTIMPKDIQLAR.[R]		1	H3	H3	1	3	1	1	462.263	1384.8	-17.07	50481.9	HCD (High Energy Collision Dissociation)	30	MS2	24.6627	10628	Yang-N-3-20230914.raw	F1		1.35
		FALSE	High	Sequest HT (A4)	Unambiguous	[R].VTIMPKDIQLAR.[R]		1	H3	H3	1	3	1	1	462.263	1384.8	-17.4	343344	HCD (High Energy Collision Dissociation)	30	MS2	23.737	8018	Yang-E-2-20230914.raw	F5		1.28
		FALSE	High	Sequest HT (A4)	Unambiguous	[R].VTIMPKDIQLAR.[R]		1	H3	H3	1	3	1	1	462.262	1384.8	-18.65	603239	HCD (High Energy Collision Dissociation)	30	MS2	23.7725	9734	Yang-C-2-20230914.raw	F8		1.28
	FALSE	High	[R].KYQKSTELLIR.[K]	1xAcetylation [K4]	1	1	4	H3	H3 [54-64]	H3 1xAcetylation [K57]	2	1420.82	1.5	14.36	124.8	77.7	11.45	12.74	269052	428834	329277		312669	348250	491964	588572	614861		335069	401439		High	Peak Found	Peak Found	n/a	High	High	High	2.53	20.31
		Checked	Confidence	Identifying Node	PSM Ambiguity	Annotated Sequence	Modifications	# Proteins	Master Protein Accessions	Protein Accessions	# Missed Cleavages	Charge	DeltaScore	Rank	m/z [Da]	Theo. MH+ [Da]	DeltaM [ppm]	Intensity	Activation Type	NCE [%]	MS Order	RT [min]	First Scan	Spectrum File	File ID	Quan Info	XCorr
		FALSE	High	Sequest HT (A4)	Unambiguous	[R].KYQkSTELLIR.[K]	K4(Acetyla)	1	H3	H3	2	3	0.1502	1	474.272	1420.82	-9.35	67461.4	HCD (High Energy Collision Dissociation)	30	MS2	20.2792	7855	Yang-C-3-20230914.raw	F7		2.53
		FALSE	High	Sequest HT (A4)	Unambiguous	[R].KYQkSTELLIR.[K]	K4(Acetyla)	1	H3	H3	2	3	0.2256	1	474.269	1420.82	-17.15	55669.8	HCD (High Energy Collision Dissociation)	30	MS2	20.2424	8368	Yang-N-2-20230914.raw	F2		1.95
		FALSE	High	Sequest HT (A4)	Unambiguous	[R].KYQkSTELLIR.[K]	K4(Acetyla)	1	H3	H3	2	3	0.2164	1	474.269	1420.82	-17.08	73943.1	HCD (High Energy Collision Dissociation)	30	MS2	20.2772	8504	Yang-N-1-20230914.raw	F3		1.71
		FALSE	High	Sequest HT (A4)	Unambiguous	[R].KYQkSTELLIR.[K]	K4(Acetyla)	1	H3	H3	2	3	0.1484	1	474.268	1420.82	-18.31	31573.8	HCD (High Energy Collision Dissociation)	30	MS2	20.2705	6507	Yang-E-1-20230914.raw	F6		1.55
	FALSE	High	[R].KSAPTTGGVKKPHR.[Y]		1	1	14	H3	H3 [28-41]		2	1463.84	0.3	76.58	56.3	187.7	7.71	70.59	324925	377400	317915	3.00035e+06	427301	1.71627e+06	594129	517980	593645	3.00035e+06	457914	1.9784e+06		High	Peak Found	High	High	High	High	High	2.44	9.56
		Checked	Confidence	Identifying Node	PSM Ambiguity	Annotated Sequence	Modifications	# Proteins	Master Protein Accessions	Protein Accessions	# Missed Cleavages	Charge	DeltaScore	Rank	m/z [Da]	Theo. MH+ [Da]	DeltaM [ppm]	Intensity	Activation Type	NCE [%]	MS Order	RT [min]	First Scan	Spectrum File	File ID	Quan Info	XCorr
		FALSE	High	Sequest HT (A4)	Unambiguous	[R].KSAPTTGGVKKPHR.[Y]		1	H3	H3	2	4	1	1	366.713	1463.84	-9.5	407308	HCD (High Energy Collision Dissociation)	30	MS2	9.5197	2091	Yang-E-3-20230914.raw	F4		2.44
		FALSE	High	Sequest HT (A4)	Unambiguous	[R].KSAPTTGGVKKPHR.[Y]		1	H3	H3	2	4	1	1	366.709	1463.84	-19.34	787977	HCD (High Energy Collision Dissociation)	30	MS2	9.7779	2784	Yang-C-1-20230914.raw	F9		1.83
		FALSE	High	Sequest HT (A4)	Unambiguous	[R].KSAPTTGGVKKPHR.[Y]		1	H3	H3	2	4	1	1	366.712	1463.84	-13	923467	HCD (High Energy Collision Dissociation)	30	MS2	9.5324	3095	Yang-N-2-20230914.raw	F2		1.81
		FALSE	High	Sequest HT (A4)	Unambiguous	[R].KSAPTTGGVKKPHR.[Y]		1	H3	H3	2	4	1	1	366.713	1463.84	-10.75	131747	HCD (High Energy Collision Dissociation)	30	MS2	9.4958	2079	Yang-E-3-20230914.raw	F4		1.81
		FALSE	High	Sequest HT (A4)	Unambiguous	[R].KSAPTTGGVKKPHR.[Y]		1	H3	H3	2	3	1	1	488.62	1463.84	0.08	210528	HCD (High Energy Collision Dissociation)	30	MS2	9.5337	3097	Yang-N-2-20230914.raw	F2		1.72
		FALSE	High	Sequest HT (A4)	Unambiguous	[R].KSAPTTGGVKKPHR.[Y]		1	H3	H3	2	4	1	1	366.71	1463.84	-18.92	5.04948e+06	HCD (High Energy Collision Dissociation)	30	MS2	9.5974	3196	Yang-N-1-20230914.raw	F3		1.59
		FALSE	High	Sequest HT (A4)	Unambiguous	[R].KSAPTTGGVKKPHR.[Y]		1	H3	H3	2	4	1	1	366.712	1463.84	-12.83	671534	HCD (High Energy Collision Dissociation)	30	MS2	9.5784	2741	Yang-C-3-20230914.raw	F7		1.58
		FALSE	High	Sequest HT (A4)	Unambiguous	[R].KSAPTTGGVKKPHR.[Y]		1	H3	H3	2	4	1	1	366.711	1463.84	-13.66	1.53864e+06	HCD (High Energy Collision Dissociation)	30	MS2	9.624	3192	Yang-N-3-20230914.raw	F1		1.56
		FALSE	High	Sequest HT (A4)	Unambiguous	[R].KSAPTTGGVKKPHR.[Y]		1	H3	H3	2	3	1	1	488.62	1463.84	1.33	247244	HCD (High Energy Collision Dissociation)	30	MS2	9.6258	3195	Yang-N-3-20230914.raw	F1		1.48
		FALSE	High	Sequest HT (A4)	Unambiguous	[R].KSAPTTGGVKKPHR.[Y]		1	H3	H3	2	4	1	1	366.71	1463.84	-16.58	302889	HCD (High Energy Collision Dissociation)	30	MS2	9.5487	2068	Yang-E-1-20230914.raw	F6		1.39
		FALSE	High	Sequest HT (A4)	Unambiguous	[R].KSAPTTGGVKKPHR.[Y]		1	H3	H3	2	4	1	1	366.71	1463.84	-18.67	156041	HCD (High Energy Collision Dissociation)	30	MS2	9.5109	2048	Yang-E-1-20230914.raw	F6		1.37
		FALSE	High	Sequest HT (A4)	Unambiguous	[R].KSAPTTGGVKKPHR.[Y]		1	H3	H3	2	4	1	1	366.71	1463.84	-16.58	65938.5	HCD (High Energy Collision Dissociation)	30	MS2	9.5523	2158	Yang-E-2-20230914.raw	F5		1.36
		FALSE	High	Sequest HT (A4)	Unambiguous	[R].KSAPTTGGVKKPHR.[Y]		1	H3	H3	2	3	1	1	488.612	1463.84	-15.8	30828.8	HCD (High Energy Collision Dissociation)	30	MS2	9.6464	2154	Yang-E-3-20230914.raw	F4		1.32
		FALSE	High	Sequest HT (A4)	Unambiguous	[R].KSAPTTGGVKKPHR.[Y]		1	H3	H3	2	3	1	1	488.613	1463.84	-13.36	135139	HCD (High Energy Collision Dissociation)	30	MS2	9.6748	2791	Yang-C-3-20230914.raw	F7		1.25
	FALSE	High	[R].EIAQDFKTDLR.[F]		1	1	38	H3	H3 [74-84]		1	1335.69	1.016	25.85	88.1	84.5	19.34	11.31	1.23866e+08	1.11283e+08	1.04288e+08	1.81987e+08	1.74348e+08	1.93297e+08	2.26491e+08	1.52735e+08	1.94737e+08	1.81987e+08	1.86838e+08	2.2282e+08		High	High	High	Peak Found	High	Peak Found	High	2.44	19.35
		Checked	Confidence	Identifying Node	PSM Ambiguity	Annotated Sequence	Modifications	# Proteins	Master Protein Accessions	Protein Accessions	# Missed Cleavages	Charge	DeltaScore	Rank	m/z [Da]	Theo. MH+ [Da]	DeltaM [ppm]	Intensity	Activation Type	NCE [%]	MS Order	RT [min]	First Scan	Spectrum File	File ID	Quan Info	XCorr
		FALSE	High	Sequest HT (A4)	Unambiguous	[R].EIAQDFKTDLR.[F]		1	H3	H3	1	3	1	1	445.895	1335.69	-14.96	108198	HCD (High Energy Collision Dissociation)	30	MS2	20.9432	8193	Yang-C-3-20230914.raw	F7		2.44
		FALSE	High	Sequest HT (A4)	Unambiguous	[R].EIAQDFKTDLR.[F]		1	H3	H3	1	3	1	1	445.894	1335.69	-16.61	176979792	HCD (High Energy Collision Dissociation)	30	MS2	19.4111	7417	Yang-C-3-20230914.raw	F7		2.39
		FALSE	High	Sequest HT (A4)	Unambiguous	[R].EIAQDFKTDLR.[F]		1	H3	H3	1	3	1	1	445.896	1335.69	-11.67	154000	HCD (High Energy Collision Dissociation)	30	MS2	19.2531	7336	Yang-C-3-20230914.raw	F7		2.37
		FALSE	High	Sequest HT (A4)	Unambiguous	[R].EIAQDFKTDLR.[F]		1	H3	H3	1	3	1	1	445.895	1335.69	-15.78	1.23484e+06	HCD (High Energy Collision Dissociation)	30	MS2	19.8449	7638	Yang-C-3-20230914.raw	F7		2.33
		FALSE	High	Sequest HT (A4)	Unambiguous	[R].EIAQDFKTDLR.[F]		1	H3	H3	1	3	1	1	445.896	1335.69	-13.52	873925	HCD (High Energy Collision Dissociation)	30	MS2	19.7225	7574	Yang-C-3-20230914.raw	F7		2.29
		FALSE	High	Sequest HT (A4)	Unambiguous	[R].EIAQDFKTDLR.[F]		1	H3	H3	1	3	1	1	445.895	1335.69	-15.1	53668348	HCD (High Energy Collision Dissociation)	30	MS2	19.4966	7463	Yang-C-3-20230914.raw	F7		2.15
		FALSE	High	Sequest HT (A4)	Unambiguous	[R].EIAQDFKTDLR.[F]		1	H3	H3	1	3	1	1	445.896	1335.69	-13.66	4621736	HCD (High Energy Collision Dissociation)	30	MS2	19.5782	7504	Yang-C-3-20230914.raw	F7		2.14
		FALSE	High	Sequest HT (A4)	Unambiguous	[R].EIAQDFKTDLR.[F]		1	H3	H3	1	3	1	1	445.894	1335.69	-17.15	716263	HCD (High Energy Collision Dissociation)	30	MS2	19.9271	7679	Yang-C-3-20230914.raw	F7		2.13
		FALSE	High	Sequest HT (A4)	Unambiguous	[R].EIAQDFKTDLR.[F]		1	H3	H3	1	3	1	1	445.895	1335.69	-14.62	839567	HCD (High Energy Collision Dissociation)	30	MS2	19.6203	6215	Yang-E-1-20230914.raw	F6		2.11
		FALSE	High	Sequest HT (A4)	Unambiguous	[R].EIAQDFKTDLR.[F]		1	H3	H3	1	3	1	1	445.895	1335.69	-14.28	138480	HCD (High Energy Collision Dissociation)	30	MS2	20.4417	7937	Yang-C-3-20230914.raw	F7		2.03
		FALSE	High	Sequest HT (A4)	Unambiguous	[R].EIAQDFKTDLR.[F]		1	H3	H3	1	3	1	1	445.896	1335.69	-13.73	156653	HCD (High Energy Collision Dissociation)	30	MS2	20.3607	7897	Yang-C-3-20230914.raw	F7		2.03
		FALSE	High	Sequest HT (A4)	Unambiguous	[R].EIAQDFKTDLR.[F]		1	H3	H3	1	3	1	1	445.895	1335.69	-15.58	126538688	HCD (High Energy Collision Dissociation)	30	MS2	19.4033	7414	Yang-C-3-20230914.raw	F7		2.01
		FALSE	High	Sequest HT (A4)	Unambiguous	[R].EIAQDFKTDLR.[F]		1	H3	H3	1	3	1	1	445.896	1335.69	-12.49	2.25431e+06	HCD (High Energy Collision Dissociation)	30	MS2	19.6109	7520	Yang-C-3-20230914.raw	F7		1.9
		FALSE	High	Sequest HT (A4)	Unambiguous	[R].EIAQDFKTDLR.[F]		1	H3	H3	1	3	1	1	445.894	1335.69	-17.43	260141	HCD (High Energy Collision Dissociation)	30	MS2	19.9625	6370	Yang-E-1-20230914.raw	F6		1.87
		FALSE	High	Sequest HT (A4)	Unambiguous	[R].EIAQDFKTDLR.[F]		1	H3	H3	1	3	1	1	445.893	1335.69	-19.01	4754337	HCD (High Energy Collision Dissociation)	30	MS2	19.52	6168	Yang-E-1-20230914.raw	F6		1.85
		FALSE	High	Sequest HT (A4)	Unambiguous	[R].EIAQDFKTDLR.[F]		1	H3	H3	1	2	1	1	668.343	1335.69	-8.55	163984	HCD (High Energy Collision Dissociation)	30	MS2	20.2237	7828	Yang-C-3-20230914.raw	F7		1.84
		FALSE	High	Sequest HT (A4)	Unambiguous	[R].EIAQDFKTDLR.[F]		1	H3	H3	1	3	1	1	445.895	1335.69	-14.34	158053	HCD (High Energy Collision Dissociation)	30	MS2	19.1016	7263	Yang-C-3-20230914.raw	F7		1.82
		FALSE	High	Sequest HT (A4)	Unambiguous	[R].EIAQDFKTDLR.[F]		1	H3	H3	1	3	1	1	445.893	1335.69	-19.35	889380	HCD (High Energy Collision Dissociation)	30	MS2	20.0071	8255	Yang-N-2-20230914.raw	F2		1.68
		FALSE	High	Sequest HT (A4)	Unambiguous	[R].EIAQDFKTDLR.[F]		1	H3	H3	1	3	1	1	445.895	1335.69	-15.44	59269.9	HCD (High Energy Collision Dissociation)	30	MS2	21.504	8479	Yang-C-3-20230914.raw	F7		1.66
		FALSE	High	Sequest HT (A4)	Unambiguous	[R].EIAQDFKTDLR.[F]		1	H3	H3	1	3	1	1	445.896	1335.69	-13.38	54338.8	HCD (High Energy Collision Dissociation)	30	MS2	17.3882	6433	Yang-C-3-20230914.raw	F7		1.65
		FALSE	High	Sequest HT (A4)	Unambiguous	[R].EIAQDFKTDLR.[F]		1	H3	H3	1	3	1	1	445.894	1335.69	-17.36	91496.6	HCD (High Energy Collision Dissociation)	30	MS2	21.0353	8242	Yang-C-3-20230914.raw	F7		1.63
		FALSE	High	Sequest HT (A4)	Unambiguous	[R].EIAQDFKTDLR.[F]		1	H3	H3	1	3	1	1	445.896	1335.69	-13.52	65793.3	HCD (High Energy Collision Dissociation)	30	MS2	21.5306	8492	Yang-C-3-20230914.raw	F7		1.61
		FALSE	High	Sequest HT (A4)	Unambiguous	[R].EIAQDFKTDLR.[F]		1	H3	H3	1	3	1	1	445.894	1335.69	-16.61	176979792	HCD (High Energy Collision Dissociation)	30	MS2	19.4294	7428	Yang-C-3-20230914.raw	F7		1.6
		FALSE	High	Sequest HT (A4)	Unambiguous	[R].EIAQDFKTDLR.[F]		1	H3	H3	1	3	1	1	445.896	1335.69	-12.22	45369.7	HCD (High Energy Collision Dissociation)	30	MS2	19.1874	7304	Yang-C-3-20230914.raw	F7		1.6
		FALSE	High	Sequest HT (A4)	Unambiguous	[R].EIAQDFKTDLR.[F]		1	H3	H3	1	3	1	1	445.895	1335.69	-14.07	6919189	HCD (High Energy Collision Dissociation)	30	MS2	19.3122	7365	Yang-C-3-20230914.raw	F7		1.59
		FALSE	High	Sequest HT (A4)	Unambiguous	[R].EIAQDFKTDLR.[F]		1	H3	H3	1	3	1	1	445.893	1335.69	-18.53	63495	HCD (High Energy Collision Dissociation)	30	MS2	21.6159	9023	Yang-N-2-20230914.raw	F2		1.57
		FALSE	High	Sequest HT (A4)	Unambiguous	[R].EIAQDFKTDLR.[F]		1	H3	H3	1	3	1	1	445.894	1335.69	-17.43	49890.7	HCD (High Energy Collision Dissociation)	30	MS2	19.118	5987	Yang-E-1-20230914.raw	F6		1.57
		FALSE	High	Sequest HT (A4)	Unambiguous	[R].EIAQDFKTDLR.[F]		1	H3	H3	1	3	1	1	445.893	1335.69	-19.83	954251	HCD (High Energy Collision Dissociation)	30	MS2	19.7252	7711	Yang-C-2-20230914.raw	F8		1.56
		FALSE	High	Sequest HT (A4)	Unambiguous	[R].EIAQDFKTDLR.[F]		1	H3	H3	1	3	1	1	445.893	1335.69	-18.8	46539.6	HCD (High Energy Collision Dissociation)	30	MS2	19.1019	5980	Yang-E-1-20230914.raw	F6		1.51
		FALSE	High	Sequest HT (A4)	Unambiguous	[R].EIAQDFKTDLR.[F]		1	H3	H3	1	3	1	1	445.894	1335.69	-17.02	9387002	HCD (High Energy Collision Dissociation)	30	MS2	19.316	6065	Yang-E-1-20230914.raw	F6		1.51
		FALSE	High	Sequest HT (A4)	Unambiguous	[R].EIAQDFKTDLR.[F]		1	H3	H3	1	3	1	1	445.894	1335.69	-17.77	225029	HCD (High Energy Collision Dissociation)	30	MS2	20.1373	6445	Yang-E-1-20230914.raw	F6		1.46
		FALSE	High	Sequest HT (A4)	Unambiguous	[R].EIAQDFKTDLR.[F]		1	H3	H3	1	3	1	1	445.893	1335.69	-18.8	74402.3	HCD (High Energy Collision Dissociation)	30	MS2	21.3572	8901	Yang-N-2-20230914.raw	F2		1.45
		FALSE	High	Sequest HT (A4)	Unambiguous	[R].EIAQDFKTDLR.[F]		1	H3	H3	1	3	1	1	445.893	1335.69	-19.9	1.67087e+06	HCD (High Energy Collision Dissociation)	30	MS2	19.6649	7669	Yang-C-1-20230914.raw	F9		1.44
		FALSE	High	Sequest HT (A4)	Unambiguous	[R].EIAQDFKTDLR.[F]		1	H3	H3	1	3	1	1	445.893	1335.69	-18.39	294854	HCD (High Energy Collision Dissociation)	30	MS2	19.9044	6344	Yang-E-1-20230914.raw	F6		1.38
		FALSE	High	Sequest HT (A4)	Unambiguous	[R].EIAQDFKTDLR.[F]		1	H3	H3	1	3	1	1	445.893	1335.69	-18.8	927249	HCD (High Energy Collision Dissociation)	30	MS2	19.2663	7477	Yang-C-2-20230914.raw	F8		1.34
		FALSE	High	Sequest HT (A4)	Unambiguous	[R].EIAQDFKTDLR.[F]		1	H3	H3	1	3	1	1	445.893	1335.69	-19.35	889380	HCD (High Energy Collision Dissociation)	30	MS2	20.0109	8257	Yang-N-2-20230914.raw	F2		1.32
		FALSE	High	Sequest HT (A4)	Unambiguous	[R].EIAQDFKTDLR.[F]		1	H3	H3	1	3	1	1	445.895	1335.69	-15.1	53668348	HCD (High Energy Collision Dissociation)	30	MS2	19.4838	7455	Yang-C-3-20230914.raw	F7		1.31
		FALSE	High	Sequest HT (A4)	Unambiguous	[R].EIAQDFKTDLR.[F]		1	H3	H3	1	3	1	1	445.893	1335.69	-19.21	48874.8	HCD (High Energy Collision Dissociation)	30	MS2	20.5567	6643	Yang-E-1-20230914.raw	F6		1.26
	FALSE	High	[R].KSAPTTGGVKKPHR.[Y]	2xAcetylation [K1; K10]	1	1	7	H3	H3 [28-41]	H3 2xAcetylation [K28; K37]	2	1547.87	0.746	100.73	92.8	134.8	58.39	73.33	429053	262948	705593	1.76657e+06	222014	988385	784526	360895	1.31756e+06	1.76657e+06	237919	1.13934e+06		High	High	High	Peak Found	Peak Found	High	High	2.34	9.81
		Checked	Confidence	Identifying Node	PSM Ambiguity	Annotated Sequence	Modifications	# Proteins	Master Protein Accessions	Protein Accessions	# Missed Cleavages	Charge	DeltaScore	Rank	m/z [Da]	Theo. MH+ [Da]	DeltaM [ppm]	Intensity	Activation Type	NCE [%]	MS Order	RT [min]	First Scan	Spectrum File	File ID	Quan Info	XCorr
		FALSE	High	Sequest HT (A4)	Unambiguous	[R].kSAPTTGGVkKPHR.[Y]	K1(Acetyla); K10(Acetyla)	1	H3	H3	2	4	0.3077	1	387.724	1547.87	4.5	2.6181e+06	HCD (High Energy Collision Dissociation)	30	MS2	9.8227	3320	Yang-N-1-20230914.raw	F3		2.34
		FALSE	High	Sequest HT (A4)	Unambiguous	[R].kSAPTTGGVkKPHR.[Y]	K1(Acetyla); K10(Acetyla)	1	H3	H3	2	4	0.4545	1	387.722	1547.87	0.55	1.1853e+06	HCD (High Energy Collision Dissociation)	30	MS2	10.0733	2937	Yang-C-1-20230914.raw	F9		2.2
		FALSE	High	Sequest HT (A4)	Unambiguous	[R].kSAPTTGGVkKPHR.[Y]	K1(Acetyla); K10(Acetyla)	1	H3	H3	2	4	0.4419	1	387.724	1547.87	4.97	232492	HCD (High Energy Collision Dissociation)	30	MS2	9.9049	2332	Yang-E-2-20230914.raw	F5		2.15
		FALSE	High	Sequest HT (A4)	Unambiguous	[R].kSAPTTGGVkKPHR.[Y]	K1(Acetyla); K10(Acetyla)	1	H3	H3	2	3	0.599	1	516.632	1547.87	9.67	31312.7	HCD (High Energy Collision Dissociation)	30	MS2	10.0294	2914	Yang-C-1-20230914.raw	F9		2.07
		FALSE	High	Sequest HT (A4)	Unambiguous	[R].kSAPTTGGVkKPHR.[Y]	K1(Acetyla); K10(Acetyla)	1	H3	H3	2	4	0.4348	1	387.724	1547.87	4.58	330828	HCD (High Energy Collision Dissociation)	30	MS2	9.8296	2209	Yang-E-1-20230914.raw	F6		1.84
		FALSE	High	Sequest HT (A4)	Unambiguous	[R].kSAPTTGGVkKPHR.[Y]	K1(Acetyla); K10(Acetyla)	1	H3	H3	2	4	0.3018	1	387.716	1547.87	-13.96	3896.83	HCD (High Energy Collision Dissociation)	30	MS2	9.9631	2925	Yang-C-3-20230914.raw	F7		1.69
		FALSE	High	Sequest HT (A4)	Unambiguous	[R].kSAPTTGGVkKPHR.[Y]	K1(Acetyla); K10(Acetyla)	1	H3	H3	2	4	0.1069	1	387.722	1547.87	1.82	654164	HCD (High Energy Collision Dissociation)	30	MS2	9.7503	2975	Yang-C-2-20230914.raw	F8		1.31
	FALSE	High	[R].KSAPTTGGVK.[K]		1	1	3	H3	H3 [28-37]		1	945.536	0.681	19.53	78.6	123.9	13.64	14.03	1775862	2033876	1.96801e+06	5115045	3823651	4.68169e+06	3.24718e+06	2.79148e+06	3.67489e+06	5115045	4.09758e+06	5.39674e+06		High	Peak Found	Peak Found	Peak Found	Peak Found	Peak Found	High	2.27	8.07
		Checked	Confidence	Identifying Node	PSM Ambiguity	Annotated Sequence	Modifications	# Proteins	Master Protein Accessions	Protein Accessions	# Missed Cleavages	Charge	DeltaScore	Rank	m/z [Da]	Theo. MH+ [Da]	DeltaM [ppm]	Intensity	Activation Type	NCE [%]	MS Order	RT [min]	First Scan	Spectrum File	File ID	Quan Info	XCorr
		FALSE	High	Sequest HT (A4)	Unambiguous	[R].KSAPTTGGVK.[K]		1	H3	H3	1	2	1	1	473.265	945.536	-14.92	1990756	HCD (High Energy Collision Dissociation)	30	MS2	8.1435	2322	Yang-C-3-20230914.raw	F7		2.27
		FALSE	High	Sequest HT (A4)	Unambiguous	[R].KSAPTTGGVK.[K]		1	H3	H3	1	2	1	1	473.266	945.536	-12.53	107859	HCD (High Energy Collision Dissociation)	30	MS2	9.6582	2781	Yang-C-3-20230914.raw	F7		1.56
		FALSE	High	Sequest HT (A4)	Unambiguous	[R].KSAPTTGGVK.[K]		1	H3	H3	1	2	1	1	473.263	945.536	-19.05	332121	HCD (High Energy Collision Dissociation)	30	MS2	8.2089	1813	Yang-E-2-20230914.raw	F5		1.32
	FALSE	High	[R].VTIMPKDIQLARR.[I]		1	1	4	H3	H3 [118-130]		2	1540.9	1.332	39.09	125.6	105.1	41.49	21.55	70172.5	189956	75170.5		94034.6	118845	128311	260713	140367		100771	136996		High	Peak Found	Peak Found	n/a	High	High	High	2.13	20.29
		Checked	Confidence	Identifying Node	PSM Ambiguity	Annotated Sequence	Modifications	# Proteins	Master Protein Accessions	Protein Accessions	# Missed Cleavages	Charge	DeltaScore	Rank	m/z [Da]	Theo. MH+ [Da]	DeltaM [ppm]	Intensity	Activation Type	NCE [%]	MS Order	RT [min]	First Scan	Spectrum File	File ID	Quan Info	XCorr
		FALSE	High	Sequest HT (A4)	Unambiguous	[R].VTIMPKDIQLARR.[I]		1	H3	H3	2	4	0.8357	1	385.977	1540.9	-7.84	98556.5	HCD (High Energy Collision Dissociation)	30	MS2	20.2755	7853	Yang-C-3-20230914.raw	F7		2.13
		FALSE	High	Sequest HT (A4)	Unambiguous	[R].VTIMPKDIQLARR.[I]		1	H3	H3	2	4	0.7727	1	385.973	1540.9	-17.83	47081.5	HCD (High Energy Collision Dissociation)	30	MS2	20.1937	8344	Yang-N-2-20230914.raw	F2		1.54
		FALSE	High	Sequest HT (A4)	Unambiguous	[R].VTIMPKDIQLARR.[I]		1	H3	H3	2	4	0.8248	1	385.973	1540.9	-17.59	126968	HCD (High Energy Collision Dissociation)	30	MS2	20.3067	8518	Yang-N-1-20230914.raw	F3		1.37
		FALSE	High	Sequest HT (A4)	Unambiguous	[R].VTIMPKDIQLARR.[I]		1	H3	H3	2	4	0.8252	1	385.975	1540.9	-13.47	80438.7	HCD (High Energy Collision Dissociation)	30	MS2	20.3158	7874	Yang-C-3-20230914.raw	F7		1.03
	FALSE	High	[R].KQLATKAAR.[K]	1xAcetylation [K6]	1	1	5	H3	H3 [19-27]	H3 1xAcetylation [K24]	2	1028.62																			No Quan Values	High	n/a	n/a	n/a	n/a	High	High	2.11
		Checked	Confidence	Identifying Node	PSM Ambiguity	Annotated Sequence	Modifications	# Proteins	Master Protein Accessions	Protein Accessions	# Missed Cleavages	Charge	DeltaScore	Rank	m/z [Da]	Theo. MH+ [Da]	DeltaM [ppm]	Intensity	Activation Type	NCE [%]	MS Order	RT [min]	First Scan	Spectrum File	File ID	Quan Info	XCorr
		FALSE	High	Sequest HT (A4)	Unambiguous	[R].KQLATkAAR.[K]	K6(Acetyla)	1	H3	H3	2	2	0.7062	1	514.805	1028.62	-16.93	9620976	HCD (High Energy Collision Dissociation)	30	MS2	9.8183	3317	Yang-N-1-20230914.raw	F3		2.11
		FALSE	High	Sequest HT (A4)	Unambiguous	[R].KQLATkAAR.[K]	K6(Acetyla)	1	H3	H3	2	2	0.6923	1	514.807	1028.62	-13.61	829533	HCD (High Energy Collision Dissociation)	30	MS2	9.8536	2306	Yang-E-2-20230914.raw	F5		1.95
		FALSE	High	Sequest HT (A4)	Unambiguous	[R].KQLATkAAR.[K]	K6(Acetyla)	1	H3	H3	2	2	0.7302	1	514.806	1028.62	-15.63	1.32992e+06	HCD (High Energy Collision Dissociation)	30	MS2	9.791	2188	Yang-E-1-20230914.raw	F6		1.89
		FALSE	High	Sequest HT (A4)	Unambiguous	[R].KQLATkAAR.[K]	K6(Acetyla)	1	H3	H3	2	2	0.5798	1	514.808	1028.62	-11.12	2.64184e+06	HCD (High Energy Collision Dissociation)	30	MS2	10.0646	2976	Yang-C-3-20230914.raw	F7		1.88
		FALSE	High	Sequest HT (A4)	Unambiguous	[R].KQLATkAAR.[K]	K6(Acetyla)	1	H3	H3	2	2	0.828	1	514.813	1028.62	-3.05	1.3314e+06	HCD (High Energy Collision Dissociation)	30	MS2	9.742	2200	Yang-E-3-20230914.raw	F4		1.57
	FALSE	High	[R].KLPFQRLVR.[E]		1	1	4	H3	H3 [65-73]		2	1156.73	0.765	19.33	94.5	123.5	41.79	4.99	590444	313996	502803	1.32915e+06	1.13346e+06	1064673	1.07963e+06	430958	938888	1.32915e+06	1.21466e+06	1.22728e+06		High	Peak Found	Peak Found	Peak Found	Peak Found	High	High	2.1	18.49
		Checked	Confidence	Identifying Node	PSM Ambiguity	Annotated Sequence	Modifications	# Proteins	Master Protein Accessions	Protein Accessions	# Missed Cleavages	Charge	DeltaScore	Rank	m/z [Da]	Theo. MH+ [Da]	DeltaM [ppm]	Intensity	Activation Type	NCE [%]	MS Order	RT [min]	First Scan	Spectrum File	File ID	Quan Info	XCorr
		FALSE	High	Sequest HT (A4)	Unambiguous	[R].KLPFQRLVR.[E]		1	H3	H3	2	3	1	1	386.242	1156.73	-17.8	1.00299e+06	HCD (High Energy Collision Dissociation)	30	MS2	18.6114	7670	Yang-N-1-20230914.raw	F3		2.1
		FALSE	High	Sequest HT (A4)	Unambiguous	[R].KLPFQRLVR.[E]		1	H3	H3	2	3	1	1	386.242	1156.73	-17.88	48735.2	HCD (High Energy Collision Dissociation)	30	MS2	18.2658	7497	Yang-N-1-20230914.raw	F3		1.54
		FALSE	High	Sequest HT (A4)	Unambiguous	[R].KLPFQRLVR.[E]		1	H3	H3	2	3	1	1	386.244	1156.73	-12.42	248485	HCD (High Energy Collision Dissociation)	30	MS2	18.298	6876	Yang-C-3-20230914.raw	F7		1.54
		FALSE	High	Sequest HT (A4)	Unambiguous	[R].KLPFQRLVR.[E]		1	H3	H3	2	3	1	1	386.244	1156.73	-11.95	128182	HCD (High Energy Collision Dissociation)	30	MS2	17.7673	6628	Yang-C-3-20230914.raw	F7		1.43
	FALSE	High	[R].KLPFQR.[L]		1	1	118	H3	H3 [65-70]		1	788.478	0.985	1.39	100.3	101.9	2.42	0.5	1.00446e+09	1.40061e+09	9.92815e+08	1.88249e+09	1.77151e+09	1.6324e+09	1.83666e+09	1.92233e+09	1.85389e+09	1.88249e+09	1.89842e+09	1.88172e+09		High	High	High	High	High	High	High	2.1	14.36
		Checked	Confidence	Identifying Node	PSM Ambiguity	Annotated Sequence	Modifications	# Proteins	Master Protein Accessions	Protein Accessions	# Missed Cleavages	Charge	DeltaScore	Rank	m/z [Da]	Theo. MH+ [Da]	DeltaM [ppm]	Intensity	Activation Type	NCE [%]	MS Order	RT [min]	First Scan	Spectrum File	File ID	Quan Info	XCorr
		FALSE	High	Sequest HT (A4)	Unambiguous	[R].KLPFQR.[L]		1	H3	H3	1	2	1	1	394.736	788.478	-16.37	761719	HCD (High Energy Collision Dissociation)	30	MS2	15.4771	5523	Yang-C-3-20230914.raw	F7		2.1
		FALSE	High	Sequest HT (A4)	Unambiguous	[R].KLPFQR.[L]		1	H3	H3	1	2	1	1	394.736	788.478	-17.06	605851584	HCD (High Energy Collision Dissociation)	30	MS2	14.4833	5024	Yang-C-3-20230914.raw	F7		2.09
		FALSE	High	Sequest HT (A4)	Unambiguous	[R].KLPFQR.[L]		1	H3	H3	1	2	1	1	394.737	788.478	-15.05	389106304	HCD (High Energy Collision Dissociation)	30	MS2	14.4895	5028	Yang-C-3-20230914.raw	F7		2.05
		FALSE	High	Sequest HT (A4)	Unambiguous	[R].KLPFQR.[L]		1	H3	H3	1	2	1	1	394.737	788.478	-15.05	389106304	HCD (High Energy Collision Dissociation)	30	MS2	14.4291	4990	Yang-C-3-20230914.raw	F7		2.03
		FALSE	High	Sequest HT (A4)	Unambiguous	[R].KLPFQR.[L]		1	H3	H3	1	2	1	1	394.736	788.478	-15.67	6.63535e+06	HCD (High Energy Collision Dissociation)	30	MS2	14.756	5166	Yang-C-3-20230914.raw	F7		2.02
		FALSE	High	Sequest HT (A4)	Unambiguous	[R].KLPFQR.[L]		1	H3	H3	1	2	1	1	394.736	788.478	-17.06	605851584	HCD (High Energy Collision Dissociation)	30	MS2	14.4673	5013	Yang-C-3-20230914.raw	F7		1.98
		FALSE	High	Sequest HT (A4)	Unambiguous	[R].KLPFQR.[L]		1	H3	H3	1	2	1	1	394.735	788.478	-18.07	1502654976	HCD (High Energy Collision Dissociation)	30	MS2	14.5036	5035	Yang-C-3-20230914.raw	F7		1.96
		FALSE	High	Sequest HT (A4)	Unambiguous	[R].KLPFQR.[L]		1	H3	H3	1	2	1	1	394.735	788.478	-19.62	761396480	HCD (High Energy Collision Dissociation)	30	MS2	14.5583	5065	Yang-C-3-20230914.raw	F7		1.9
		FALSE	High	Sequest HT (A4)	Unambiguous	[R].KLPFQR.[L]		1	H3	H3	1	2	1	1	394.737	788.478	-13.81	101698	HCD (High Energy Collision Dissociation)	30	MS2	18.9352	7182	Yang-C-3-20230914.raw	F7		1.9
		FALSE	High	Sequest HT (A4)	Unambiguous	[R].KLPFQR.[L]		1	H3	H3	1	2	1	1	394.736	788.478	-15.67	6.63535e+06	HCD (High Energy Collision Dissociation)	30	MS2	14.7654	5171	Yang-C-3-20230914.raw	F7		1.89
		FALSE	High	Sequest HT (A4)	Unambiguous	[R].KLPFQR.[L]		1	H3	H3	1	2	1	1	394.737	788.478	-14.82	49854.2	HCD (High Energy Collision Dissociation)	30	MS2	19.5997	7514	Yang-C-3-20230914.raw	F7		1.85
		FALSE	High	Sequest HT (A4)	Unambiguous	[R].KLPFQR.[L]		1	H3	H3	1	2	1	1	394.735	788.478	-19.38	273460384	HCD (High Energy Collision Dissociation)	30	MS2	14.5888	5081	Yang-C-3-20230914.raw	F7		1.85
		FALSE	High	Sequest HT (A4)	Unambiguous	[R].KLPFQR.[L]		1	H3	H3	1	2	1	1	394.736	788.478	-15.98	1.80439e+06	HCD (High Energy Collision Dissociation)	30	MS2	14.5839	4046	Yang-E-2-20230914.raw	F5		1.85
		FALSE	High	Sequest HT (A4)	Unambiguous	[R].KLPFQR.[L]		1	H3	H3	1	2	1	1	394.738	788.478	-10.41	222263	HCD (High Energy Collision Dissociation)	30	MS2	16.3501	5942	Yang-C-3-20230914.raw	F7		1.84
		FALSE	High	Sequest HT (A4)	Unambiguous	[R].KLPFQR.[L]		1	H3	H3	1	2	1	1	394.735	788.478	-18.07	1502654976	HCD (High Energy Collision Dissociation)	30	MS2	14.5117	5040	Yang-C-3-20230914.raw	F7		1.83
		FALSE	High	Sequest HT (A4)	Unambiguous	[R].KLPFQR.[L]		1	H3	H3	1	2	1	1	394.737	788.478	-12.8	333707	HCD (High Energy Collision Dissociation)	30	MS2	16.0822	5817	Yang-C-3-20230914.raw	F7		1.79
		FALSE	High	Sequest HT (A4)	Unambiguous	[R].KLPFQR.[L]		1	H3	H3	1	2	1	1	394.735	788.478	-19.38	5.81267e+06	HCD (High Energy Collision Dissociation)	30	MS2	14.6144	5646	Yang-N-1-20230914.raw	F3		1.78
		FALSE	High	Sequest HT (A4)	Unambiguous	[R].KLPFQR.[L]		1	H3	H3	1	2	1	1	394.736	788.478	-17.14	2904172	HCD (High Energy Collision Dissociation)	30	MS2	14.5394	4025	Yang-E-2-20230914.raw	F5		1.78
		FALSE	High	Sequest HT (A4)	Unambiguous	[R].KLPFQR.[L]		1	H3	H3	1	2	1	1	394.737	788.478	-14.59	205819	HCD (High Energy Collision Dissociation)	30	MS2	17.4403	6458	Yang-C-3-20230914.raw	F7		1.75
		FALSE	High	Sequest HT (A4)	Unambiguous	[R].KLPFQR.[L]		1	H3	H3	1	2	1	1	394.735	788.478	-18.3	1124573952	HCD (High Energy Collision Dissociation)	30	MS2	14.5256	5047	Yang-C-3-20230914.raw	F7		1.74
		FALSE	High	Sequest HT (A4)	Unambiguous	[R].KLPFQR.[L]		1	H3	H3	1	2	1	1	394.738	788.478	-12.57	124259	HCD (High Energy Collision Dissociation)	30	MS2	17.9758	6726	Yang-C-3-20230914.raw	F7		1.74
		FALSE	High	Sequest HT (A4)	Unambiguous	[R].KLPFQR.[L]		1	H3	H3	1	2	1	1	394.736	788.478	-15.75	555726	HCD (High Energy Collision Dissociation)	30	MS2	15.81	5685	Yang-C-3-20230914.raw	F7		1.74
		FALSE	High	Sequest HT (A4)	Unambiguous	[R].KLPFQR.[L]		1	H3	H3	1	2	1	1	394.738	788.478	-12.5	52596.5	HCD (High Energy Collision Dissociation)	30	MS2	21.2279	8339	Yang-C-3-20230914.raw	F7		1.73
		FALSE	High	Sequest HT (A4)	Unambiguous	[R].KLPFQR.[L]		1	H3	H3	1	2	1	1	394.737	788.478	-13.81	157513	HCD (High Energy Collision Dissociation)	30	MS2	13.5042	4531	Yang-C-3-20230914.raw	F7		1.67
		FALSE	High	Sequest HT (A4)	Unambiguous	[R].KLPFQR.[L]		1	H3	H3	1	2	1	1	394.738	788.478	-11.72	2.65505e+06	HCD (High Energy Collision Dissociation)	30	MS2	14.894	5236	Yang-C-3-20230914.raw	F7		1.67
		FALSE	High	Sequest HT (A4)	Unambiguous	[R].KLPFQR.[L]		1	H3	H3	1	2	1	1	394.737	788.478	-13.73	165457	HCD (High Energy Collision Dissociation)	30	MS2	18.5119	6975	Yang-C-3-20230914.raw	F7		1.66
		FALSE	High	Sequest HT (A4)	Unambiguous	[R].KLPFQR.[L]		1	H3	H3	1	2	1	1	394.737	788.478	-14.59	4706537	HCD (High Energy Collision Dissociation)	30	MS2	14.8527	5216	Yang-C-3-20230914.raw	F7		1.66
		FALSE	High	Sequest HT (A4)	Unambiguous	[R].KLPFQR.[L]		1	H3	H3	1	2	1	1	394.736	788.478	-17.14	237485	HCD (High Energy Collision Dissociation)	30	MS2	19.4553	7441	Yang-C-3-20230914.raw	F7		1.66
		FALSE	High	Sequest HT (A4)	Unambiguous	[R].KLPFQR.[L]		1	H3	H3	1	2	1	1	394.736	788.478	-17.68	233312	HCD (High Energy Collision Dissociation)	30	MS2	15.0275	4197	Yang-E-1-20230914.raw	F6		1.64
		FALSE	High	Sequest HT (A4)	Unambiguous	[R].KLPFQR.[L]		1	H3	H3	1	2	1	1	394.737	788.478	-15.13	625122	HCD (High Energy Collision Dissociation)	30	MS2	15.8465	5704	Yang-C-3-20230914.raw	F7		1.61
		FALSE	High	Sequest HT (A4)	Unambiguous	[R].KLPFQR.[L]		1	H3	H3	1	2	1	1	394.736	788.478	-15.36	1.28375e+06	HCD (High Energy Collision Dissociation)	30	MS2	15.2781	5426	Yang-C-3-20230914.raw	F7		1.61
		FALSE	High	Sequest HT (A4)	Unambiguous	[R].KLPFQR.[L]		1	H3	H3	1	2	1	1	394.735	788.478	-19.15	69195.4	HCD (High Energy Collision Dissociation)	30	MS2	13.5654	4966	Yang-N-2-20230914.raw	F2		1.6
		FALSE	High	Sequest HT (A4)	Unambiguous	[R].KLPFQR.[L]		1	H3	H3	1	2	1	1	394.738	788.478	-12.5	73516.4	HCD (High Energy Collision Dissociation)	30	MS2	19.6922	7559	Yang-C-3-20230914.raw	F7		1.56
		FALSE	High	Sequest HT (A4)	Unambiguous	[R].KLPFQR.[L]		1	H3	H3	1	2	1	1	394.736	788.478	-15.9	710794	HCD (High Energy Collision Dissociation)	30	MS2	15.9691	6339	Yang-N-1-20230914.raw	F3		1.56
		FALSE	High	Sequest HT (A4)	Unambiguous	[R].KLPFQR.[L]		1	H3	H3	1	2	1	1	394.735	788.478	-18.46	58811.3	HCD (High Energy Collision Dissociation)	30	MS2	20.8848	8676	Yang-N-2-20230914.raw	F2		1.55
		FALSE	High	Sequest HT (A4)	Unambiguous	[R].KLPFQR.[L]		1	H3	H3	1	2	1	1	394.736	788.478	-17.53	256266	HCD (High Energy Collision Dissociation)	30	MS2	16.5359	6625	Yang-N-1-20230914.raw	F3		1.54
		FALSE	High	Sequest HT (A4)	Unambiguous	[R].KLPFQR.[L]		1	H3	H3	1	2	1	1	394.736	788.478	-17.22	294253	HCD (High Energy Collision Dissociation)	30	MS2	16.2565	6378	Yang-N-2-20230914.raw	F2		1.54
		FALSE	High	Sequest HT (A4)	Unambiguous	[R].KLPFQR.[L]		1	H3	H3	1	2	1	1	394.736	788.478	-15.75	122586	HCD (High Energy Collision Dissociation)	30	MS2	19.046	7235	Yang-C-3-20230914.raw	F7		1.53
		FALSE	High	Sequest HT (A4)	Unambiguous	[R].KLPFQR.[L]		1	H3	H3	1	2	1	1	394.735	788.478	-19.46	199438	HCD (High Energy Collision Dissociation)	30	MS2	18.2417	7377	Yang-N-2-20230914.raw	F2		1.52
		FALSE	High	Sequest HT (A4)	Unambiguous	[R].KLPFQR.[L]		1	H3	H3	1	2	1	1	394.736	788.478	-17.76	55897.9	HCD (High Energy Collision Dissociation)	30	MS2	21.2992	8970	Yang-N-3-20230914.raw	F1		1.52
		FALSE	High	Sequest HT (A4)	Unambiguous	[R].KLPFQR.[L]		1	H3	H3	1	2	1	1	394.736	788.478	-17.29	54826.7	HCD (High Energy Collision Dissociation)	30	MS2	21.6893	9185	Yang-N-1-20230914.raw	F3		1.5
		FALSE	High	Sequest HT (A4)	Unambiguous	[R].KLPFQR.[L]		1	H3	H3	1	2	1	1	394.736	788.478	-16.44	56811.1	HCD (High Energy Collision Dissociation)	30	MS2	20.0996	8418	Yang-N-1-20230914.raw	F3		1.5
		FALSE	High	Sequest HT (A4)	Unambiguous	[R].KLPFQR.[L]		1	H3	H3	1	2	1	1	394.735	788.478	-18.22	1.38358e+06	HCD (High Energy Collision Dissociation)	30	MS2	14.5926	3983	Yang-E-1-20230914.raw	F6		1.49
		FALSE	High	Sequest HT (A4)	Unambiguous	[R].KLPFQR.[L]		1	H3	H3	1	2	1	1	394.735	788.478	-18.38	62774.4	HCD (High Energy Collision Dissociation)	30	MS2	21.9751	9194	Yang-N-2-20230914.raw	F2		1.49
		FALSE	High	Sequest HT (A4)	Unambiguous	[R].KLPFQR.[L]		1	H3	H3	1	2	1	1	394.735	788.478	-17.84	8788394	HCD (High Energy Collision Dissociation)	30	MS2	14.5927	5629	Yang-N-3-20230914.raw	F1		1.47
		FALSE	High	Sequest HT (A4)	Unambiguous	[R].KLPFQR.[L]		1	H3	H3	1	2	1	1	394.735	788.478	-19.46	8328593	HCD (High Energy Collision Dissociation)	30	MS2	14.561	5497	Yang-N-2-20230914.raw	F2		1.46
		FALSE	High	Sequest HT (A4)	Unambiguous	[R].KLPFQR.[L]		1	H3	H3	1	2	1	1	394.735	788.478	-19.23	18301734	HCD (High Energy Collision Dissociation)	30	MS2	14.5143	5595	Yang-N-1-20230914.raw	F3		1.45
		FALSE	High	Sequest HT (A4)	Unambiguous	[R].KLPFQR.[L]		1	H3	H3	1	2	1	1	394.736	788.478	-17.14	157659	HCD (High Energy Collision Dissociation)	30	MS2	15.6424	4543	Yang-E-2-20230914.raw	F5		1.45
		FALSE	High	Sequest HT (A4)	Unambiguous	[R].KLPFQR.[L]		1	H3	H3	1	2	1	1	394.735	788.478	-19	783982	HCD (High Energy Collision Dissociation)	30	MS2	14.7928	4144	Yang-E-2-20230914.raw	F5		1.44
		FALSE	High	Sequest HT (A4)	Unambiguous	[R].KLPFQR.[L]		1	H3	H3	1	2	1	1	394.736	788.478	-17.45	7.66682e+06	HCD (High Energy Collision Dissociation)	30	MS2	14.601	5640	Yang-N-1-20230914.raw	F3		1.44
		FALSE	High	Sequest HT (A4)	Unambiguous	[R].KLPFQR.[L]		1	H3	H3	1	2	1	1	394.735	788.478	-19.85	44791.8	HCD (High Energy Collision Dissociation)	30	MS2	22.8693	9741	Yang-N-3-20230914.raw	F1		1.42
		FALSE	High	Sequest HT (A4)	Unambiguous	[R].KLPFQR.[L]		1	H3	H3	1	2	1	1	394.735	788.478	-19.54	222171	HCD (High Energy Collision Dissociation)	30	MS2	18.0539	7390	Yang-N-1-20230914.raw	F3		1.41
		FALSE	High	Sequest HT (A4)	Unambiguous	[R].KLPFQR.[L]		1	H3	H3	1	2	1	1	394.735	788.478	-18.38	60985.2	HCD (High Energy Collision Dissociation)	30	MS2	21.154	8929	Yang-N-1-20230914.raw	F3		1.4
		FALSE	High	Sequest HT (A4)	Unambiguous	[R].KLPFQR.[L]		1	H3	H3	1	2	1	1	394.736	788.478	-16.44	727153	HCD (High Energy Collision Dissociation)	30	MS2	15.525	6112	Yang-N-1-20230914.raw	F3		1.4
		FALSE	High	Sequest HT (A4)	Unambiguous	[R].KLPFQR.[L]		1	H3	H3	1	2	1	1	394.735	788.478	-19.23	260033	HCD (High Energy Collision Dissociation)	30	MS2	17.7349	7121	Yang-N-2-20230914.raw	F2		1.39
		FALSE	High	Sequest HT (A4)	Unambiguous	[R].KLPFQR.[L]		1	H3	H3	1	2	1	1	394.735	788.478	-19.38	139488	HCD (High Energy Collision Dissociation)	30	MS2	19.2673	7883	Yang-N-2-20230914.raw	F2		1.39
		FALSE	High	Sequest HT (A4)	Unambiguous	[R].KLPFQR.[L]		1	H3	H3	1	2	1	1	394.735	788.478	-19.62	1.37256e+06	HCD (High Energy Collision Dissociation)	30	MS2	15.2974	5997	Yang-N-1-20230914.raw	F3		1.39
		FALSE	High	Sequest HT (A4)	Unambiguous	[R].KLPFQR.[L]		1	H3	H3	1	2	1	1	394.735	788.478	-19.46	63331.1	HCD (High Energy Collision Dissociation)	30	MS2	19.7808	7728	Yang-C-1-20230914.raw	F9		1.38
		FALSE	High	Sequest HT (A4)	Unambiguous	[R].KLPFQR.[L]		1	H3	H3	1	2	1	1	394.736	788.478	-17.76	709818	HCD (High Energy Collision Dissociation)	30	MS2	16.0616	6361	Yang-N-3-20230914.raw	F1		1.37
		FALSE	High	Sequest HT (A4)	Unambiguous	[R].KLPFQR.[L]		1	H3	H3	1	2	1	1	394.738	788.478	-12.11	41359.2	HCD (High Energy Collision Dissociation)	30	MS2	21.7805	8618	Yang-C-3-20230914.raw	F7		1.37
		FALSE	High	Sequest HT (A4)	Unambiguous	[R].KLPFQR.[L]		1	H3	H3	1	2	1	1	394.735	788.478	-18.22	666764	HCD (High Energy Collision Dissociation)	30	MS2	15.9337	6212	Yang-N-2-20230914.raw	F2		1.37
		FALSE	High	Sequest HT (A4)	Unambiguous	[R].KLPFQR.[L]		1	H3	H3	1	2	1	1	394.735	788.478	-18.46	314845	HCD (High Energy Collision Dissociation)	30	MS2	15.1003	4287	Yang-E-2-20230914.raw	F5		1.36
		FALSE	High	Sequest HT (A4)	Unambiguous	[R].KLPFQR.[L]		1	H3	H3	1	2	1	1	394.735	788.478	-17.84	136017	HCD (High Energy Collision Dissociation)	30	MS2	16.173	4789	Yang-E-2-20230914.raw	F5		1.36
		FALSE	High	Sequest HT (A4)	Unambiguous	[R].KLPFQR.[L]		1	H3	H3	1	2	1	1	394.738	788.478	-11.95	21070.2	HCD (High Energy Collision Dissociation)	30	MS2	12.6913	4152	Yang-C-3-20230914.raw	F7		1.36
		FALSE	High	Sequest HT (A4)	Unambiguous	[R].KLPFQR.[L]		1	H3	H3	1	2	1	1	394.735	788.478	-17.99	410304	HCD (High Energy Collision Dissociation)	30	MS2	16.5787	6616	Yang-N-3-20230914.raw	F1		1.36
		FALSE	High	Sequest HT (A4)	Unambiguous	[R].KLPFQR.[L]		1	H3	H3	1	2	1	1	394.735	788.478	-17.99	2.45716e+06	HCD (High Energy Collision Dissociation)	30	MS2	14.5141	3944	Yang-E-1-20230914.raw	F6		1.36
		FALSE	High	Sequest HT (A4)	Unambiguous	[R].KLPFQR.[L]		1	H3	H3	1	2	1	1	394.735	788.478	-17.84	69699	HCD (High Energy Collision Dissociation)	30	MS2	16.7045	5010	Yang-E-2-20230914.raw	F5		1.33
		FALSE	High	Sequest HT (A4)	Unambiguous	[R].KLPFQR.[L]		1	H3	H3	1	2	1	1	394.735	788.478	-18.38	147761	HCD (High Energy Collision Dissociation)	30	MS2	18.56	7643	Yang-N-1-20230914.raw	F3		1.31
		FALSE	High	Sequest HT (A4)	Unambiguous	[R].KLPFQR.[L]		1	H3	H3	1	2	1	1	394.737	788.478	-14.51	25576.6	HCD (High Energy Collision Dissociation)	30	MS2	22.6214	9038	Yang-C-3-20230914.raw	F7		1.31
		FALSE	High	Sequest HT (A4)	Unambiguous	[R].KLPFQR.[L]		1	H3	H3	1	2	1	1	394.736	788.478	-16.91	43397.6	HCD (High Energy Collision Dissociation)	30	MS2	32.1153	14217	Yang-N-1-20230914.raw	F3		1.31
		FALSE	High	Sequest HT (A4)	Unambiguous	[R].KLPFQR.[L]		1	H3	H3	1	2	1	1	394.736	788.478	-16.91	1365195	HCD (High Energy Collision Dissociation)	30	MS2	15.3038	5983	Yang-N-3-20230914.raw	F1		1.3
		FALSE	High	Sequest HT (A4)	Unambiguous	[R].KLPFQR.[L]		1	H3	H3	1	2	1	1	394.735	788.478	-19.31	140102	HCD (High Energy Collision Dissociation)	30	MS2	18.3608	7544	Yang-N-1-20230914.raw	F3		1.3
		FALSE	High	Sequest HT (A4)	Unambiguous	[R].KLPFQR.[L]		1	H3	H3	1	2	1	1	394.735	788.478	-19.46	620491	HCD (High Energy Collision Dissociation)	30	MS2	15.5445	6103	Yang-N-3-20230914.raw	F1		1.3
		FALSE	High	Sequest HT (A4)	Unambiguous	[R].KLPFQR.[L]		1	H3	H3	1	2	1	1	394.735	788.478	-18.61	303458	HCD (High Energy Collision Dissociation)	30	MS2	16.3967	6093	Yang-C-2-20230914.raw	F8		1.29
		FALSE	High	Sequest HT (A4)	Unambiguous	[R].KLPFQR.[L]		1	H3	H3	1	2	1	1	394.735	788.478	-18.38	4443161	HCD (High Energy Collision Dissociation)	30	MS2	14.7843	5275	Yang-C-1-20230914.raw	F9		1.29
		FALSE	High	Sequest HT (A4)	Unambiguous	[R].KLPFQR.[L]		1	H3	H3	1	2	1	1	394.735	788.478	-19.07	748396	HCD (High Energy Collision Dissociation)	30	MS2	15.7624	6123	Yang-N-2-20230914.raw	F2		1.29
		FALSE	High	Sequest HT (A4)	Unambiguous	[R].KLPFQR.[L]		1	H3	H3	1	2	1	1	394.735	788.478	-19.15	124180	HCD (High Energy Collision Dissociation)	30	MS2	13.5043	5067	Yang-N-1-20230914.raw	F3		1.29
		FALSE	High	Sequest HT (A4)	Unambiguous	[R].KLPFQR.[L]		1	H3	H3	1	2	1	1	394.736	788.478	-17.76	325411	HCD (High Energy Collision Dissociation)	30	MS2	17.0329	6874	Yang-N-1-20230914.raw	F3		1.28
		FALSE	High	Sequest HT (A4)	Unambiguous	[R].KLPFQR.[L]		1	H3	H3	1	2	1	1	394.737	788.478	-13.81	55007.6	HCD (High Energy Collision Dissociation)	30	MS2	24.6798	10057	Yang-C-3-20230914.raw	F7		1.28
		FALSE	High	Sequest HT (A4)	Unambiguous	[R].KLPFQR.[L]		1	H3	H3	1	2	1	1	394.737	788.478	-14.89	58739.8	HCD (High Energy Collision Dissociation)	30	MS2	22.3188	8887	Yang-C-3-20230914.raw	F7		1.28
		FALSE	High	Sequest HT (A4)	Unambiguous	[R].KLPFQR.[L]		1	H3	H3	1	2	1	1	394.735	788.478	-18.3	327726	HCD (High Energy Collision Dissociation)	30	MS2	16.9061	6812	Yang-N-1-20230914.raw	F3		1.27
		FALSE	High	Sequest HT (A4)	Unambiguous	[R].KLPFQR.[L]		1	H3	H3	1	2	1	1	394.736	788.478	-17.29	2.10081e+06	HCD (High Energy Collision Dissociation)	30	MS2	15.0282	5846	Yang-N-3-20230914.raw	F1		1.27
		FALSE	High	Sequest HT (A4)	Unambiguous	[R].KLPFQR.[L]		1	H3	H3	1	2	1	1	394.736	788.478	-16.83	3.24211e+06	HCD (High Energy Collision Dissociation)	30	MS2	14.7826	5732	Yang-N-1-20230914.raw	F3		1.26
		FALSE	High	Sequest HT (A4)	Unambiguous	[R].KLPFQR.[L]		1	H3	H3	1	2	1	1	394.736	788.478	-17.06	740684	HCD (High Energy Collision Dissociation)	30	MS2	16.0293	6369	Yang-N-1-20230914.raw	F3		1.26
		FALSE	High	Sequest HT (A4)	Unambiguous	[R].KLPFQR.[L]		1	H3	H3	1	2	1	1	394.736	788.478	-17.53	3.83644e+06	HCD (High Energy Collision Dissociation)	30	MS2	14.755	5597	Yang-N-2-20230914.raw	F2		1.26
		FALSE	High	Sequest HT (A4)	Unambiguous	[R].KLPFQR.[L]		1	H3	H3	1	2	1	1	394.735	788.478	-19.38	171927	HCD (High Energy Collision Dissociation)	30	MS2	9.8713	3288	Yang-N-2-20230914.raw	F2		1.25
		FALSE	High	Sequest HT (A4)	Unambiguous	[R].KLPFQR.[L]		1	H3	H3	1	2	1	1	394.735	788.478	-19.38	25365.3	HCD (High Energy Collision Dissociation)	30	MS2	13.4441	4622	Yang-C-2-20230914.raw	F8		1.25
		FALSE	High	Sequest HT (A4)	Unambiguous	[R].KLPFQR.[L]		1	H3	H3	1	2	1	1	394.735	788.478	-19.07	70031.6	HCD (High Energy Collision Dissociation)	30	MS2	23.4059	10009	Yang-N-1-20230914.raw	F3		1.25
		FALSE	High	Sequest HT (A4)	Unambiguous	[R].KLPFQR.[L]		1	H3	H3	1	2	1	1	394.735	788.478	-19.77	62946.3	HCD (High Energy Collision Dissociation)	30	MS2	13.4279	5032	Yang-N-3-20230914.raw	F1		1.24
		FALSE	High	Sequest HT (A4)	Unambiguous	[R].KLPFQR.[L]		1	H3	H3	1	2	1	1	394.735	788.478	-19.15	53827.4	HCD (High Energy Collision Dissociation)	30	MS2	22.8595	9745	Yang-N-1-20230914.raw	F3		1.23
		FALSE	High	Sequest HT (A4)	Unambiguous	[R].KLPFQR.[L]		1	H3	H3	1	2	1	1	394.736	788.478	-16.52	265191	HCD (High Energy Collision Dissociation)	30	MS2	13.5942	4980	Yang-N-2-20230914.raw	F2		1.23
		FALSE	High	Sequest HT (A4)	Unambiguous	[R].KLPFQR.[L]		1	H3	H3	1	2	1	1	394.736	788.478	-16.68	3.16201e+06	HCD (High Energy Collision Dissociation)	30	MS2	14.7738	5606	Yang-N-2-20230914.raw	F2		1.22
		FALSE	High	Sequest HT (A4)	Unambiguous	[R].KLPFQR.[L]		1	H3	H3	1	2	1	1	394.735	788.478	-19.93	99548.6	HCD (High Energy Collision Dissociation)	30	MS2	20.3341	8411	Yang-N-2-20230914.raw	F2		1.22
		FALSE	High	Sequest HT (A4)	Unambiguous	[R].KLPFQR.[L]		1	H3	H3	1	2	1	1	394.737	788.478	-12.96	46942.3	HCD (High Energy Collision Dissociation)	30	MS2	20.6918	8065	Yang-C-3-20230914.raw	F7		1.21
		FALSE	High	Sequest HT (A4)	Unambiguous	[R].KLPFQR.[L]		1	H3	H3	1	2	1	1	394.735	788.478	-19.38	188580	HCD (High Energy Collision Dissociation)	30	MS2	18.321	7484	Yang-N-3-20230914.raw	F1		1.21
		FALSE	High	Sequest HT (A4)	Unambiguous	[R].KLPFQR.[L]		1	H3	H3	1	2	1	1	394.735	788.478	-18.53	126455	HCD (High Energy Collision Dissociation)	30	MS2	19.071	7900	Yang-N-1-20230914.raw	F3		1.21
		FALSE	High	Sequest HT (A4)	Unambiguous	[R].KLPFQR.[L]		1	H3	H3	1	2	1	1	394.735	788.478	-18.84	29801.7	HCD (High Energy Collision Dissociation)	30	MS2	17.7677	5480	Yang-E-2-20230914.raw	F5		1.21
		FALSE	High	Sequest HT (A4)	Unambiguous	[R].KLPFQR.[L]		1	H3	H3	1	2	1	1	394.736	788.478	-16.83	749047	HCD (High Energy Collision Dissociation)	30	MS2	16.0065	6358	Yang-N-1-20230914.raw	F3		1.2
		FALSE	High	Sequest HT (A4)	Unambiguous	[R].KLPFQR.[L]		1	H3	H3	1	2	1	1	394.736	788.478	-15.28	2.10714e+06	HCD (High Energy Collision Dissociation)	30	MS2	15.018	5852	Yang-N-1-20230914.raw	F3		1.2
		FALSE	High	Sequest HT (A4)	Unambiguous	[R].KLPFQR.[L]		1	H3	H3	1	2	1	1	394.735	788.478	-18.61	3.60114e+06	HCD (High Energy Collision Dissociation)	30	MS2	14.7874	5727	Yang-N-3-20230914.raw	F1		1.2
		FALSE	High	Sequest HT (A4)	Unambiguous	[R].KLPFQR.[L]		1	H3	H3	1	2	1	1	394.738	788.478	-10.64	43057	HCD (High Energy Collision Dissociation)	30	MS2	20.148	7790	Yang-C-3-20230914.raw	F7		1.2
		FALSE	High	Sequest HT (A4)	Unambiguous	[R].KLPFQR.[L]		1	H3	H3	1	2	1	1	394.736	788.478	-17.53	109096	HCD (High Energy Collision Dissociation)	30	MS2	27.4165	11424	Yang-C-3-20230914.raw	F7		1.19
		FALSE	High	Sequest HT (A4)	Unambiguous	[R].KLPFQR.[L]		1	H3	H3	1	2	1	1	394.735	788.478	-19.46	55747	HCD (High Energy Collision Dissociation)	30	MS2	21.8221	9227	Yang-N-3-20230914.raw	F1		1.18
		FALSE	High	Sequest HT (A4)	Unambiguous	[R].KLPFQR.[L]		1	H3	H3	1	2	1	1	394.735	788.478	-17.99	35140.9	HCD (High Energy Collision Dissociation)	30	MS2	24.5053	10545	Yang-N-1-20230914.raw	F3		1.18
		FALSE	High	Sequest HT (A4)	Unambiguous	[R].KLPFQR.[L]		1	H3	H3	1	2	1	1	394.735	788.478	-18.46	119408	HCD (High Energy Collision Dissociation)	30	MS2	15.5397	4452	Yang-E-1-20230914.raw	F6		1.18
		FALSE	High	Sequest HT (A4)	Unambiguous	[R].KLPFQR.[L]		1	H3	H3	1	2	1	1	394.735	788.478	-18.53	710198	HCD (High Energy Collision Dissociation)	30	MS2	15.9981	6245	Yang-N-2-20230914.raw	F2		1.16
		FALSE	High	Sequest HT (A4)	Unambiguous	[R].KLPFQR.[L]		1	H3	H3	1	2	1	1	394.735	788.478	-19	298103	HCD (High Energy Collision Dissociation)	30	MS2	17.2413	6865	Yang-N-2-20230914.raw	F2		1.16
		FALSE	High	Sequest HT (A4)	Unambiguous	[R].KLPFQR.[L]		1	H3	H3	1	2	1	1	394.735	788.478	-19.69	235729	HCD (High Energy Collision Dissociation)	30	MS2	13.5346	4665	Yang-C-2-20230914.raw	F8		1.16
		FALSE	High	Sequest HT (A4)	Unambiguous	[R].KLPFQR.[L]		1	H3	H3	1	2	1	1	394.735	788.478	-19.38	125041	HCD (High Energy Collision Dissociation)	30	MS2	16.0683	4705	Yang-E-1-20230914.raw	F6		1.15
		FALSE	High	Sequest HT (A4)	Unambiguous	[R].KLPFQR.[L]		1	H3	H3	1	2	1	1	394.735	788.478	-19.69	25101.8	HCD (High Energy Collision Dissociation)	30	MS2	13.3829	4530	Yang-C-1-20230914.raw	F9		1.15
		FALSE	High	Sequest HT (A4)	Unambiguous	[R].KLPFQR.[L]		1	H3	H3	1	2	1	1	394.736	788.478	-16.83	30487.9	HCD (High Energy Collision Dissociation)	30	MS2	28.4713	12486	Yang-N-1-20230914.raw	F3		1.14
		FALSE	High	Sequest HT (A4)	Unambiguous	[R].KLPFQR.[L]		1	H3	H3	1	2	1	1	394.738	788.478	-12.65	29309.7	HCD (High Energy Collision Dissociation)	30	MS2	24.0995	9769	Yang-C-3-20230914.raw	F7		1.13
		FALSE	High	Sequest HT (A4)	Unambiguous	[R].KLPFQR.[L]		1	H3	H3	1	2	1	1	394.735	788.478	-18.69	64307.1	HCD (High Energy Collision Dissociation)	30	MS2	17.1027	5135	Yang-E-1-20230914.raw	F6		1.12
		FALSE	High	Sequest HT (A4)	Unambiguous	[R].KLPFQR.[L]		1	H3	H3	1	2	1	1	394.736	788.478	-16.06	147032	HCD (High Energy Collision Dissociation)	30	MS2	10.0438	3438	Yang-N-1-20230914.raw	F3		1.11
		FALSE	High	Sequest HT (A4)	Unambiguous	[R].KLPFQR.[L]		1	H3	H3	1	2	1	1	394.735	788.478	-19.85	358065	HCD (High Energy Collision Dissociation)	30	MS2	16.0903	5950	Yang-C-1-20230914.raw	F9		1.1
		FALSE	High	Sequest HT (A4)	Unambiguous	[R].KLPFQR.[L]		1	H3	H3	1	2	1	1	394.735	788.478	-18.22	71982.3	HCD (High Energy Collision Dissociation)	30	MS2	20.6327	8678	Yang-N-1-20230914.raw	F3		1.08
		FALSE	High	Sequest HT (A4)	Unambiguous	[R].KLPFQR.[L]		1	H3	H3	1	2	1	1	394.737	788.478	-13.19	15188.2	HCD (High Energy Collision Dissociation)	30	MS2	12.5618	4087	Yang-C-3-20230914.raw	F7		1.07
		FALSE	High	Sequest HT (A4)	Unambiguous	[R].KLPFQR.[L]		1	H3	H3	1	2	1	1	394.735	788.478	-18.53	252551	HCD (High Energy Collision Dissociation)	30	MS2	17.0963	6871	Yang-N-3-20230914.raw	F1		1.07
	FALSE	High	[K].STELLIRK.[L]		1	1	8	H3	H3 [58-65]		1	959.588	0.902	22.25	51.9	56.3	14.73	21.43	104720	103600	90264.1	213187		136262	191481	142190	168551	213187		157074		High	Peak Found	Peak Found	High	High	High	High	1.99	13.8
		Checked	Confidence	Identifying Node	PSM Ambiguity	Annotated Sequence	Modifications	# Proteins	Master Protein Accessions	Protein Accessions	# Missed Cleavages	Charge	DeltaScore	Rank	m/z [Da]	Theo. MH+ [Da]	DeltaM [ppm]	Intensity	Activation Type	NCE [%]	MS Order	RT [min]	First Scan	Spectrum File	File ID	Quan Info	XCorr
		FALSE	High	Sequest HT (A4)	Unambiguous	[K].STELLIRK.[L]		1	H3	H3	1	2	1	1	480.291	959.588	-13.4	38598	HCD (High Energy Collision Dissociation)	30	MS2	13.8339	4689	Yang-C-3-20230914.raw	F7		1.99
		FALSE	High	Sequest HT (A4)	Unambiguous	[K].STELLIRK.[L]		1	H3	H3	1	2	1	1	480.29	959.588	-17.03	94771.9	HCD (High Energy Collision Dissociation)	30	MS2	13.7942	3671	Yang-E-2-20230914.raw	F5		1.67
		FALSE	High	Sequest HT (A4)	Unambiguous	[K].STELLIRK.[L]		1	H3	H3	1	2	1	1	480.289	959.588	-19	69485.4	HCD (High Energy Collision Dissociation)	30	MS2	13.8035	3586	Yang-E-1-20230914.raw	F6		1.59
		FALSE	High	Sequest HT (A4)	Unambiguous	[K].STELLIRK.[L]		1	H3	H3	1	2	1	1	480.289	959.588	-17.92	121268	HCD (High Energy Collision Dissociation)	30	MS2	13.8184	5097	Yang-N-2-20230914.raw	F2		1.55
		FALSE	High	Sequest HT (A4)	Unambiguous	[K].STELLIRK.[L]		1	H3	H3	1	2	1	1	480.289	959.588	-17.41	180377	HCD (High Energy Collision Dissociation)	30	MS2	13.8277	5231	Yang-N-1-20230914.raw	F3		1.44
		FALSE	High	Sequest HT (A4)	Unambiguous	[K].STELLIRK.[L]		1	H3	H3	1	2	1	1	480.289	959.588	-17.92	121268	HCD (High Energy Collision Dissociation)	30	MS2	13.811	5093	Yang-N-2-20230914.raw	F2		1.2
		FALSE	High	Sequest HT (A4)	Unambiguous	[K].STELLIRK.[L]		1	H3	H3	1	2	1	1	480.289	959.588	-17.41	180377	HCD (High Energy Collision Dissociation)	30	MS2	13.8221	5228	Yang-N-1-20230914.raw	F3		1.13
		FALSE	High	Sequest HT (A4)	Unambiguous	[K].STELLIRK.[L]		1	H3	H3	1	2	1	1	480.288	959.588	-19.51	170916	HCD (High Energy Collision Dissociation)	30	MS2	13.7495	5189	Yang-N-3-20230914.raw	F1		1.11
	FALSE	High	[R].VTIMPKDIQLAR.[R]	1xAcetylation [K6]	1	1	1	H3	H3 [118-129]	H3 1xAcetylation [K123]	1	1426.81																			Not Reliable	n/a	n/a	n/a	n/a	High	n/a	High	1.92
		Checked	Confidence	Identifying Node	PSM Ambiguity	Annotated Sequence	Modifications	# Proteins	Master Protein Accessions	Protein Accessions	# Missed Cleavages	Charge	DeltaScore	Rank	m/z [Da]	Theo. MH+ [Da]	DeltaM [ppm]	Intensity	Activation Type	NCE [%]	MS Order	RT [min]	First Scan	Spectrum File	File ID	Quan Info	XCorr
		FALSE	High	Sequest HT (A4)	Unambiguous	[R].VTIMPkDIQLAR.[R]	K6(Acetyla)	1	H3	H3	1	3	1	1	476.269	1426.81	-11.91	26392.6	HCD (High Energy Collision Dissociation)	30	MS2	24.1066	10236	Yang-N-2-20230914.raw	F2	Not Reliable	1.92
	FALSE	High	[R].VTIMPKDIQLAR.[R]	1xOxidation [M4]	1	1	11	H3	H3 [118-129]		1	1400.79	2.329	41.16	158.4	68	22.8	63.15	1.11106e+07	1.06932e+07	1.25508e+07	2.3743e+06	8.14006e+06	1.02871e+07	2.03159e+07	1.46764e+07	2.34361e+07	2.3743e+06	8.72323e+06	1.18583e+07		High	Peak Found	Peak Found	High	High	High	High	1.9	20.55
		Checked	Confidence	Identifying Node	PSM Ambiguity	Annotated Sequence	Modifications	# Proteins	Master Protein Accessions	Protein Accessions	# Missed Cleavages	Charge	DeltaScore	Rank	m/z [Da]	Theo. MH+ [Da]	DeltaM [ppm]	Intensity	Activation Type	NCE [%]	MS Order	RT [min]	First Scan	Spectrum File	File ID	Quan Info	XCorr
		FALSE	High	Sequest HT (A4)	Unambiguous	[R].VTImPKDIQLAR.[R]	M4(Oxidation)	1	H3	H3	1	2	1	1	700.893	1400.79	-10.18	87629	HCD (High Energy Collision Dissociation)	30	MS2	20.4491	7941	Yang-C-3-20230914.raw	F7		1.9
		FALSE	High	Sequest HT (A4)	Unambiguous	[R].VTImPKDIQLAR.[R]	M4(Oxidation)	1	H3	H3	1	3	1	1	467.594	1400.79	-19.3	69665.6	HCD (High Energy Collision Dissociation)	30	MS2	20.9741	6838	Yang-E-1-20230914.raw	F6		1.88
		FALSE	High	Sequest HT (A4)	Unambiguous	[R].VTImPKDIQLAR.[R]	M4(Oxidation)	1	H3	H3	1	2	1	1	700.888	1400.79	-16.8	40255.4	HCD (High Energy Collision Dissociation)	30	MS2	20.4504	6592	Yang-E-1-20230914.raw	F6		1.74
		FALSE	High	Sequest HT (A4)	Unambiguous	[R].VTImPKDIQLAR.[R]	M4(Oxidation)	1	H3	H3	1	2	1	1	700.89	1400.79	-15.15	29019	HCD (High Energy Collision Dissociation)	30	MS2	20.4324	6555	Yang-E-2-20230914.raw	F5		1.58
		FALSE	High	Sequest HT (A4)	Unambiguous	[R].VTImPKDIQLAR.[R]	M4(Oxidation)	1	H3	H3	1	3	1	1	467.596	1400.79	-13.22	32885.9	HCD (High Energy Collision Dissociation)	30	MS2	21.8141	8635	Yang-C-3-20230914.raw	F7		1.52
		FALSE	High	Sequest HT (A4)	Unambiguous	[R].VTImPKDIQLAR.[R]	M4(Oxidation)	1	H3	H3	1	2	1	1	700.89	1400.79	-14.97	89528.3	HCD (High Energy Collision Dissociation)	30	MS2	20.4504	8588	Yang-N-1-20230914.raw	F3		1.52
		FALSE	High	Sequest HT (A4)	Unambiguous	[R].VTImPKDIQLAR.[R]	M4(Oxidation)	1	H3	H3	1	3	1	1	467.594	1400.79	-19.17	9161228	HCD (High Energy Collision Dissociation)	30	MS2	20.5808	8653	Yang-N-1-20230914.raw	F3		1.49
		FALSE	High	Sequest HT (A4)	Unambiguous	[R].VTImPKDIQLAR.[R]	M4(Oxidation)	1	H3	H3	1	3	1	1	467.594	1400.79	-17.6	75245.4	HCD (High Energy Collision Dissociation)	30	MS2	21.1973	8950	Yang-N-1-20230914.raw	F3		1.41
		FALSE	High	Sequest HT (A4)	Unambiguous	[R].VTImPKDIQLAR.[R]	M4(Oxidation)	1	H3	H3	1	3	1	1	467.596	1400.79	-14.92	27510.6	HCD (High Energy Collision Dissociation)	30	MS2	21.7658	9200	Yang-N-3-20230914.raw	F1		1.39
		FALSE	High	Sequest HT (A4)	Unambiguous	[R].VTImPKDIQLAR.[R]	M4(Oxidation)	1	H3	H3	1	2	1	1	700.889	1400.79	-15.32	93723	HCD (High Energy Collision Dissociation)	30	MS2	20.4026	8444	Yang-N-2-20230914.raw	F2		1.36
		FALSE	High	Sequest HT (A4)	Unambiguous	[R].VTImPKDIQLAR.[R]	M4(Oxidation)	1	H3	H3	1	3	1	1	467.596	1400.79	-13.55	59792.5	HCD (High Energy Collision Dissociation)	30	MS2	23.6722	9559	Yang-C-3-20230914.raw	F7		1.3
	FALSE	High	[K].SAPTTGGVKKPHR.[Y]	1xAcetylation [K]	1	1	10	H3	H3 [29-41]	H3 1xAcetylation [K37]	1	1377.76	2.596	228.15	146	20.6	95.62	140.48	12204.3	247716	373516	2783.27		719662	22315.6	339988	697470	2783.27		829579		High	Peak Found	Peak Found	High	High	High	High	1.9	9.9
		Checked	Confidence	Identifying Node	PSM Ambiguity	Annotated Sequence	Modifications	# Proteins	Master Protein Accessions	Protein Accessions	# Missed Cleavages	Charge	DeltaScore	Rank	m/z [Da]	Theo. MH+ [Da]	DeltaM [ppm]	Intensity	Activation Type	NCE [%]	MS Order	RT [min]	First Scan	Spectrum File	File ID	Quan Info	XCorr
		FALSE	High	Sequest HT (A4)	Unambiguous	[K].SAPTTGGVkKPHR.[Y]	K9(Acetyla)	1	H3	H3	1	3	0.0211	1	459.927	1377.76	5.81	320570	HCD (High Energy Collision Dissociation)	30	MS2	9.7017	3253	Yang-N-3-20230914.raw	F1		1.9
		FALSE	High	Sequest HT (A4)	Unambiguous	[K].SAPTTGGVkKPHR.[Y]	K9(Acetyla)	1	H3	H3	1	3	0.162	1	459.916	1377.76	-18.57	162928	HCD (High Energy Collision Dissociation)	30	MS2	9.6779	3236	Yang-N-3-20230914.raw	F1		1.79
		FALSE	High	Sequest HT (A4)	Unambiguous	[K].SAPTTGGVkKPHR.[Y]	K9(Acetyla)	1	H3	H3	1	3	0.0756	1	459.916	1377.76	-19.17	1.94813e+06	HCD (High Energy Collision Dissociation)	30	MS2	9.8244	3321	Yang-N-1-20230914.raw	F3		1.72
		FALSE	High	Sequest HT (A4)	Unambiguous	[K].SAPTTGGVkKPHR.[Y]	K9(Acetyla)	1	H3	H3	1	3	0.1595	1	459.917	1377.76	-17.11	184966	HCD (High Energy Collision Dissociation)	30	MS2	9.8037	2196	Yang-E-1-20230914.raw	F6		1.63
		FALSE	High	Sequest HT (A4)	Unambiguous	[K].SAPTTGGVkKPHR.[Y]	K9(Acetyla)	1	H3	H3	1	3	0.1384	1	459.921	1377.76	-8.41	143171	HCD (High Energy Collision Dissociation)	30	MS2	9.7506	2205	Yang-E-3-20230914.raw	F4		1.59
		FALSE	High	Sequest HT (A4)	Unambiguous	[K].SAPTTGGVKkPHR.[Y]	K10(Acetyla)	1	H3	H3	1	3	0.0909	1	459.919	1377.76	-11.79	1367935	HCD (High Energy Collision Dissociation)	30	MS2	10.0723	2980	Yang-C-3-20230914.raw	F7		1.54
		FALSE	High	Sequest HT (A4)	Unambiguous	[K].SAPTTGGVkKPHR.[Y]	K9(Acetyla)	1	H3	H3	1	3	0.0397	1	459.916	1377.76	-18.97	679659	HCD (High Energy Collision Dissociation)	30	MS2	9.6979	3200	Yang-N-2-20230914.raw	F2		1.51
		FALSE	High	Sequest HT (A4)	Unambiguous	[K].SAPTTGGVkKPHR.[Y]	K9(Acetyla)	1	H3	H3	1	3	0.0671	1	459.93	1377.76	11.53	92356.6	HCD (High Energy Collision Dissociation)	30	MS2	9.6371	3220	Yang-N-1-20230914.raw	F3		1.49
		FALSE	High	Sequest HT (A4)	Unambiguous	[K].SAPTTGGVkKPHR.[Y]	K9(Acetyla)	1	H3	H3	1	3	0.0362	1	459.928	1377.76	6.75	38281.6	HCD (High Energy Collision Dissociation)	30	MS2	9.7182	2237	Yang-E-2-20230914.raw	F5		1.38
		FALSE	High	Sequest HT (A4)	Unambiguous	[K].SAPTTGGVKkPHR.[Y]	K10(Acetyla)	1	H3	H3	1	3	0.0403	1	459.922	1377.76	-6.28	373959	HCD (High Energy Collision Dissociation)	30	MS2	9.745	3279	Yang-N-3-20230914.raw	F1		1.24
	FALSE	High	[R].VTIMPKDIQLAR.[R]	1xOxidation [M4]; 1xAcetylation [K6]	1	1	7	H3	H3 [118-129]	H3 1xAcetylation [K123]	1	1442.8	0.758	20.76	87.4	108.5	17.47	15.72	53858.2	59175.8	61915.2	152571	106265	105997	98480.2	81218.4	115615	152571	113878	122187		High	Peak Found	High	Peak Found	High	High	High	1.86	28.51
		Checked	Confidence	Identifying Node	PSM Ambiguity	Annotated Sequence	Modifications	# Proteins	Master Protein Accessions	Protein Accessions	# Missed Cleavages	Charge	DeltaScore	Rank	m/z [Da]	Theo. MH+ [Da]	DeltaM [ppm]	Intensity	Activation Type	NCE [%]	MS Order	RT [min]	First Scan	Spectrum File	File ID	Quan Info	XCorr
		FALSE	High	Sequest HT (A4)	Unambiguous	[R].VTImPkDIQLAR.[R]	M4(Oxidation); K6(Acetyla)	1	H3	H3	1	3	1	1	481.604	1442.8	-3.72	30245.9	HCD (High Energy Collision Dissociation)	30	MS2	21.1732	8939	Yang-N-1-20230914.raw	F3	Not Reliable	1.86
		FALSE	High	Sequest HT (A4)	Unambiguous	[R].VTImPkDIQLAR.[R]	M4(Oxidation); K6(Acetyla)	1	H3	H3	1	3	1	1	481.603	1442.8	-7.02	56050	HCD (High Energy Collision Dissociation)	30	MS2	21.1593	8806	Yang-N-2-20230914.raw	F2	Not Reliable	1.61
		FALSE	High	Sequest HT (A4)	Unambiguous	[R].VTImPkDIQLAR.[R]	M4(Oxidation); K6(Acetyla)	1	H3	H3	1	3	1	1	481.602	1442.8	-7.97	40872.6	HCD (High Energy Collision Dissociation)	30	MS2	21.1882	8437	Yang-C-1-20230914.raw	F9	Not Reliable	1.33
		FALSE	High	Sequest HT (A4)	Unambiguous	[R].VTImPkDIQLAR.[R]	M4(Oxidation); K6(Acetyla)	1	H3	H3	1	2	1	1	721.899	1442.8	-9	44067.1	HCD (High Energy Collision Dissociation)	30	MS2	28.4884	11957	Yang-C-3-20230914.raw	F7		1.32
		FALSE	High	Sequest HT (A4)	Unambiguous	[R].VTImPkDIQLAR.[R]	M4(Oxidation); K6(Acetyla)	1	H3	H3	1	2	1	1	721.895	1442.8	-14.08	31702.9	HCD (High Energy Collision Dissociation)	30	MS2	28.4695	12485	Yang-N-1-20230914.raw	F3		1.24
		FALSE	High	Sequest HT (A4)	Unambiguous	[R].VTImPkDIQLAR.[R]	M4(Oxidation); K6(Acetyla)	1	H3	H3	1	2	1	1	721.893	1442.8	-16.78	20097.9	HCD (High Energy Collision Dissociation)	30	MS2	28.4573	12407	Yang-N-2-20230914.raw	F2		1.17
		FALSE	High	Sequest HT (A4)	Unambiguous	[R].VTImPkDIQLAR.[R]	M4(Oxidation); K6(Acetyla)	1	H3	H3	1	2	1	1	721.894	1442.8	-15.94	22535.9	HCD (High Energy Collision Dissociation)	30	MS2	28.4673	10080	Yang-E-2-20230914.raw	F5		1.07
	FALSE	High	[R].KYQKSTELLIR.[K]		1	1	2	H3	H3 [54-64]		2	1378.81	1.633	22.97	143.7	88	7.95	22.23	3.71097e+06	4.69471e+06	4026851	5309859	3.18757e+06	3.60421e+06	6.78554e+06	6.44347e+06	7.51937e+06	5309859	3.41594e+06	4.15469e+06		Peak Found	Peak Found	Peak Found	Peak Found	Peak Found	High	High	1.83	14.02
		Checked	Confidence	Identifying Node	PSM Ambiguity	Annotated Sequence	Modifications	# Proteins	Master Protein Accessions	Protein Accessions	# Missed Cleavages	Charge	DeltaScore	Rank	m/z [Da]	Theo. MH+ [Da]	DeltaM [ppm]	Intensity	Activation Type	NCE [%]	MS Order	RT [min]	First Scan	Spectrum File	File ID	Quan Info	XCorr
		FALSE	High	Sequest HT (A4)	Unambiguous	[R].KYQKSTELLIR.[K]		1	H3	H3	2	3	0.5738	1	460.265	1378.81	-17.05	347593	HCD (High Energy Collision Dissociation)	30	MS2	13.9661	3665	Yang-E-1-20230914.raw	F6		1.83
		FALSE	High	Sequest HT (A4)	Unambiguous	[R].KYQKSTELLIR.[K]		1	H3	H3	2	3	0.6517	1	460.265	1378.81	-18.11	231659	HCD (High Energy Collision Dissociation)	30	MS2	13.8818	5258	Yang-N-1-20230914.raw	F3		1.78
	FALSE	High	[R].KLPFQR.[L]	1xAcetylation [K1]	1	1	5	H3	H3 [65-70]	H3 1xAcetylation [K65]	1	830.488	1.05	12.56	98.2	93.5	18.01	4.71	2.60106e+06	2620643	2762747	4.70625e+06	3.99725e+06	3.92839e+06	4.75606e+06	3.59682e+06	5.1589e+06	4.70625e+06	4.28362e+06	4.52838e+06		High	Peak Found	Peak Found	Peak Found	Peak Found	High	High	1.82	19.6
		Checked	Confidence	Identifying Node	PSM Ambiguity	Annotated Sequence	Modifications	# Proteins	Master Protein Accessions	Protein Accessions	# Missed Cleavages	Charge	DeltaScore	Rank	m/z [Da]	Theo. MH+ [Da]	DeltaM [ppm]	Intensity	Activation Type	NCE [%]	MS Order	RT [min]	First Scan	Spectrum File	File ID	Quan Info	XCorr
		FALSE	High	Sequest HT (A4)	Unambiguous	[R].kLPFQR.[L]	K1(Acetyla)	1	H3	H3	1	2	1	1	415.743	830.488	-11.43	2.23109e+06	HCD (High Energy Collision Dissociation)	30	MS2	19.6193	7523	Yang-C-3-20230914.raw	F7		1.82
		FALSE	High	Sequest HT (A4)	Unambiguous	[R].kLPFQR.[L]	K1(Acetyla)	1	H3	H3	1	2	1	1	415.742	830.488	-12.83	769018	HCD (High Energy Collision Dissociation)	30	MS2	19.5847	7506	Yang-C-3-20230914.raw	F7		1.61
		FALSE	High	Sequest HT (A4)	Unambiguous	[R].kLPFQR.[L]	K1(Acetyla)	1	H3	H3	1	2	1	1	415.74	830.488	-18.78	88241.2	HCD (High Energy Collision Dissociation)	30	MS2	19.52	6133	Yang-E-2-20230914.raw	F5		1.42
		FALSE	High	Sequest HT (A4)	Unambiguous	[R].kLPFQR.[L]	K1(Acetyla)	1	H3	H3	1	2	1	1	415.741	830.488	-16.57	1.55838e+06	HCD (High Energy Collision Dissociation)	30	MS2	19.615	6178	Yang-E-2-20230914.raw	F5		1.24
		FALSE	High	Sequest HT (A4)	Unambiguous	[R].kLPFQR.[L]	K1(Acetyla)	1	H3	H3	1	2	1	1	415.741	830.488	-17.53	5173819	HCD (High Energy Collision Dissociation)	30	MS2	19.6341	8188	Yang-N-1-20230914.raw	F3		1.14
	FALSE	High	[K].DIQLARR.[I]		1	1	4	H3	H3 [124-130]		1	871.511	0.501	14.63	53.3	95.9	11.47	10.12	1.00405e+06	1.13333e+06	1.04601e+06	3.30486e+06	3.64011e+06	2.83944e+06	1.83591e+06	1.55548e+06	1.95322e+06	3.30486e+06	3.90089e+06	3.27312e+06		High	Peak Found	Peak Found	Peak Found	High	Peak Found	High	1.8	11.8
		Checked	Confidence	Identifying Node	PSM Ambiguity	Annotated Sequence	Modifications	# Proteins	Master Protein Accessions	Protein Accessions	# Missed Cleavages	Charge	DeltaScore	Rank	m/z [Da]	Theo. MH+ [Da]	DeltaM [ppm]	Intensity	Activation Type	NCE [%]	MS Order	RT [min]	First Scan	Spectrum File	File ID	Quan Info	XCorr
		FALSE	High	Sequest HT (A4)	Unambiguous	[K].DIQLARR.[I]		1	H3	H3	1	2	1	1	436.256	871.511	-8.02	519845	HCD (High Energy Collision Dissociation)	30	MS2	11.6109	2880	Yang-E-3-20230914.raw	F4		1.8
		FALSE	High	Sequest HT (A4)	Unambiguous	[K].DIQLARR.[I]		1	H3	H3	1	2	1	1	436.251	871.511	-18.95	184402	HCD (High Energy Collision Dissociation)	30	MS2	11.796	4152	Yang-N-2-20230914.raw	F2		1.2
		FALSE	High	Sequest HT (A4)	Unambiguous	[K].DIQLARR.[I]		1	H3	H3	1	2	1	1	436.251	871.511	-19.09	23160.7	HCD (High Energy Collision Dissociation)	30	MS2	11.7289	2963	Yang-E-2-20230914.raw	F5		1.19
		FALSE	High	Sequest HT (A4)	Unambiguous	[K].DIQLARR.[I]		1	H3	H3	1	2	1	1	436.254	871.511	-11.25	1.5477e+06	HCD (High Energy Collision Dissociation)	30	MS2	11.8109	3739	Yang-C-3-20230914.raw	F7		1.11
	FALSE	High	[R].TKQTAR.[K]	1xAcetylation [K2]	1	1	11	H3	H3 [4-9]	H3 1xAcetylation [K5]	1	746.416	0.709	14.67	80.5	113.5	13.99	7.03	414125	518846	494852	1.02447e+06	996275	1.0178e+06	757231	712113	924041	1.02447e+06	1.06765e+06	1.17326e+06		High	High	High	High	High	High	High	1.8	5.95
		Checked	Confidence	Identifying Node	PSM Ambiguity	Annotated Sequence	Modifications	# Proteins	Master Protein Accessions	Protein Accessions	# Missed Cleavages	Charge	DeltaScore	Rank	m/z [Da]	Theo. MH+ [Da]	DeltaM [ppm]	Intensity	Activation Type	NCE [%]	MS Order	RT [min]	First Scan	Spectrum File	File ID	Quan Info	XCorr
		FALSE	High	Sequest HT (A4)	Unambiguous	[R].TkQTAR.[K]	K2(Acetyla)	1	H3	H3	1	2	1	1	373.716	746.416	12.33	25587.1	HCD (High Energy Collision Dissociation)	30	MS2	5.9636	1772	Yang-N-2-20230914.raw	F2		1.8
		FALSE	High	Sequest HT (A4)	Unambiguous	[R].TkQTAR.[K]	K2(Acetyla)	1	H3	H3	1	2	0.9651	1	373.705	746.416	-18.09	366520	HCD (High Energy Collision Dissociation)	30	MS2	5.9815	1777	Yang-N-1-20230914.raw	F3		1.72
		FALSE	High	Sequest HT (A4)	Unambiguous	[R].TkQTAR.[K]	K2(Acetyla)	1	H3	H3	1	2	1	1	373.716	746.416	11.51	5602.56	HCD (High Energy Collision Dissociation)	30	MS2	5.9119	1754	Yang-N-2-20230914.raw	F2		1.68
		FALSE	High	Sequest HT (A4)	Unambiguous	[R].TkQTAR.[K]	K2(Acetyla)	1	H3	H3	1	2	1	1	373.716	746.416	11.35	22786.7	HCD (High Energy Collision Dissociation)	30	MS2	5.992	1795	Yang-N-3-20230914.raw	F1		1.65
		FALSE	High	Sequest HT (A4)	Unambiguous	[R].TkQTAR.[K]	K2(Acetyla)	1	H3	H3	1	2	1	1	373.705	746.416	-18.01	26644.6	HCD (High Energy Collision Dissociation)	30	MS2	5.9286	1760	Yang-N-1-20230914.raw	F3		1.34
		FALSE	High	Sequest HT (A4)	Unambiguous	[R].TkQTAR.[K]	K2(Acetyla)	1	H3	H3	1	2	1	1	373.705	746.416	-18.25	1.18005e+06	HCD (High Energy Collision Dissociation)	30	MS2	6.0743	1812	Yang-N-1-20230914.raw	F3		1.32
		FALSE	High	Sequest HT (A4)	Unambiguous	[R].TkQTAR.[K]	K2(Acetyla)	1	H3	H3	1	2	1	1	373.715	746.416	9.55	20165	HCD (High Energy Collision Dissociation)	30	MS2	5.8511	1567	Yang-C-1-20230914.raw	F9		1.29
		FALSE	High	Sequest HT (A4)	Unambiguous	[R].TkQTAR.[K]	K2(Acetyla)	1	H3	H3	1	2	1	1	373.714	746.416	8.16	20209.5	HCD (High Energy Collision Dissociation)	30	MS2	5.845	1659	Yang-C-2-20230914.raw	F8		1.11
		FALSE	High	Sequest HT (A4)	Unambiguous	[R].TkQTAR.[K]	K2(Acetyla)	1	H3	H3	1	2	1	1	373.705	746.416	-18.42	32722	HCD (High Energy Collision Dissociation)	30	MS2	7.7318	2465	Yang-N-1-20230914.raw	F3		1.11
		FALSE	High	Sequest HT (A4)	Unambiguous	[R].TkQTAR.[K]	K2(Acetyla)	1	H3	H3	1	2	1	1	373.714	746.416	7.59	24864.7	HCD (High Energy Collision Dissociation)	30	MS2	5.8614	1666	Yang-C-2-20230914.raw	F8		1.09
		FALSE	High	Sequest HT (A4)	Unambiguous	[R].TkQTAR.[K]	K2(Acetyla)	1	H3	H3	1	2	1	1	373.715	746.416	10.61	22037.1	HCD (High Energy Collision Dissociation)	30	MS2	5.835	1579	Yang-C-3-20230914.raw	F7		1.07
	FALSE	High	[K].KPHRYRPGTVALR.[E]		1	1	12	H3	H3 [38-50]		1	1550.9	0.557	10.07	98.6	172.2	10.85	11.57	141480	152585	132739	474457	350773	375457	258697	209422	247865	474457	375903	432802		High	High	Peak Found	High	High	High	High	1.76	14.35
		Checked	Confidence	Identifying Node	PSM Ambiguity	Annotated Sequence	Modifications	# Proteins	Master Protein Accessions	Protein Accessions	# Missed Cleavages	Charge	DeltaScore	Rank	m/z [Da]	Theo. MH+ [Da]	DeltaM [ppm]	Intensity	Activation Type	NCE [%]	MS Order	RT [min]	First Scan	Spectrum File	File ID	Quan Info	XCorr
		FALSE	High	Sequest HT (A4)	Unambiguous	[K].KPHRYRPGTVALR.[E]		1	H3	H3	1	4	1	1	388.474	1550.9	-17.49	65026	HCD (High Energy Collision Dissociation)	30	MS2	13.4698	5050	Yang-N-1-20230914.raw	F3		1.76
		FALSE	High	Sequest HT (A4)	Unambiguous	[K].KPHRYRPGTVALR.[E]		1	H3	H3	1	4	1	1	388.474	1550.9	-17.73	111277	HCD (High Energy Collision Dissociation)	30	MS2	13.4624	4915	Yang-N-2-20230914.raw	F2		1.66
		FALSE	High	Sequest HT (A4)	Unambiguous	[K].KPHRYRPGTVALR.[E]		1	H3	H3	1	4	1	1	388.474	1550.9	-18.99	40193.6	HCD (High Energy Collision Dissociation)	30	MS2	13.3718	5002	Yang-N-1-20230914.raw	F3		1.65
		FALSE	High	Sequest HT (A4)	Unambiguous	[K].KPHRYRPGTVALR.[E]		1	H3	H3	1	4	1	1	388.473	1550.9	-19.7	90371.7	HCD (High Energy Collision Dissociation)	30	MS2	14.0682	5352	Yang-N-3-20230914.raw	F1		1.55
		FALSE	High	Sequest HT (A4)	Unambiguous	[K].KPHRYRPGTVALR.[E]		1	H3	H3	1	4	1	1	388.474	1550.9	-18.83	128047	HCD (High Energy Collision Dissociation)	30	MS2	14.1389	5396	Yang-N-1-20230914.raw	F3		1.54
		FALSE	High	Sequest HT (A4)	Unambiguous	[K].KPHRYRPGTVALR.[E]		1	H3	H3	1	4	1	1	388.474	1550.9	-17.97	46880.8	HCD (High Energy Collision Dissociation)	30	MS2	13.3522	4993	Yang-N-1-20230914.raw	F3		1.5
		FALSE	High	Sequest HT (A4)	Unambiguous	[K].KPHRYRPGTVALR.[E]		1	H3	H3	1	4	1	1	388.474	1550.9	-18.44	20127.3	HCD (High Energy Collision Dissociation)	30	MS2	13.6485	4719	Yang-C-2-20230914.raw	F8		1.43
		FALSE	High	Sequest HT (A4)	Unambiguous	[K].KPHRYRPGTVALR.[E]		1	H3	H3	1	4	1	1	388.473	1550.9	-19.93	46050.6	HCD (High Energy Collision Dissociation)	30	MS2	13.3387	4989	Yang-N-3-20230914.raw	F1		1.39
		FALSE	High	Sequest HT (A4)	Unambiguous	[K].KPHRYRPGTVALR.[E]		1	H3	H3	1	4	1	1	388.473	1550.9	-19.85	105847	HCD (High Energy Collision Dissociation)	30	MS2	13.4414	4905	Yang-N-2-20230914.raw	F2		1.38
		FALSE	High	Sequest HT (A4)	Unambiguous	[K].KPHRYRPGTVALR.[E]		1	H3	H3	1	4	1	1	388.474	1550.9	-17.89	91509.1	HCD (High Energy Collision Dissociation)	30	MS2	14.1078	5379	Yang-N-1-20230914.raw	F3		1.37
		FALSE	High	Sequest HT (A4)	Unambiguous	[K].KPHRYRPGTVALR.[E]		1	H3	H3	1	4	1	1	388.474	1550.9	-17.1	25910.6	HCD (High Energy Collision Dissociation)	30	MS2	13.8511	5114	Yang-N-2-20230914.raw	F2		1.3
		FALSE	High	Sequest HT (A4)	Unambiguous	[K].KPHRYRPGTVALR.[E]		1	H3	H3	1	4	1	1	388.477	1550.9	-10.57	51884.6	HCD (High Energy Collision Dissociation)	30	MS2	15.0969	5337	Yang-C-3-20230914.raw	F7		1.24
	FALSE	High	[R].YRPGTVALREIRK.[Y]		1	1	3	H3	H3 [42-54]		2	1558.92	1.393	9.39	174.6	125.4	3.5	9.89	227415	312433	238787	350406	287274	251156	415831	428813	445889	350406	307855	289516		High	Peak Found	Peak Found	Peak Found	Peak Found	High	High	1.72	14.27
		Checked	Confidence	Identifying Node	PSM Ambiguity	Annotated Sequence	Modifications	# Proteins	Master Protein Accessions	Protein Accessions	# Missed Cleavages	Charge	DeltaScore	Rank	m/z [Da]	Theo. MH+ [Da]	DeltaM [ppm]	Intensity	Activation Type	NCE [%]	MS Order	RT [min]	First Scan	Spectrum File	File ID	Quan Info	XCorr
		FALSE	High	Sequest HT (A4)	Unambiguous	[R].YRPGTVALREIRK.[Y]		1	H3	H3	2	3	1	1	520.301	1558.92	-19.02	234789	HCD (High Energy Collision Dissociation)	30	MS2	14.1193	5384	Yang-N-1-20230914.raw	F3		1.72
		FALSE	High	Sequest HT (A4)	Unambiguous	[R].YRPGTVALREIRK.[Y]		1	H3	H3	2	3	1	1	520.301	1558.92	-18.55	130798	HCD (High Energy Collision Dissociation)	30	MS2	14.4166	4984	Yang-C-3-20230914.raw	F7		1.43
		FALSE	High	Sequest HT (A4)	Unambiguous	[R].YRPGTVALREIRK.[Y]		1	H3	H3	2	3	1	1	520.301	1558.92	-18.08	132672	HCD (High Energy Collision Dissociation)	30	MS2	14.0899	5369	Yang-N-1-20230914.raw	F3		1.36
	FALSE	High	[R].KSTGGKAPR.[K]	1xAcetylation [K6]	1	1	9	H3	H3 [10-18]	H3 1xAcetylation [K15]	2	943.532	0.814	22.21	97	119.4	12.25	86.12	1.59077e+07	1.91249e+07	1.79103e+07	4.1061e+07	3.3411e+07	282069	2.90874e+07	2.62488e+07	3.34441e+07	4.1061e+07	3.58047e+07	325151		High	Peak Found	High	Peak Found	High	High	High	1.65	7.17
		Checked	Confidence	Identifying Node	PSM Ambiguity	Annotated Sequence	Modifications	# Proteins	Master Protein Accessions	Protein Accessions	# Missed Cleavages	Charge	DeltaScore	Rank	m/z [Da]	Theo. MH+ [Da]	DeltaM [ppm]	Intensity	Activation Type	NCE [%]	MS Order	RT [min]	First Scan	Spectrum File	File ID	Quan Info	XCorr
		FALSE	High	Sequest HT (A4)	Unambiguous	[R].KSTGGkAPR.[K]	K6(Acetyla)	1	H3	H3	2	2	0.5939	1	472.262	943.532	-16.48	1.31955e+06	HCD (High Energy Collision Dissociation)	30	MS2	7.3872	2077	Yang-C-3-20230914.raw	F7		1.65
		FALSE	High	Sequest HT (A4)	Unambiguous	[R].KSTGGkAPR.[K]	K6(Acetyla)	1	H3	H3	2	2	0.6345	1	472.265	943.532	-9.88	4725415	HCD (High Energy Collision Dissociation)	30	MS2	7.1466	1543	Yang-E-2-20230914.raw	F5		1.45
		FALSE	High	Sequest HT (A4)	Unambiguous	[R].KSTGGkAPR.[K]	K6(Acetyla)	1	H3	H3	2	2	0.7083	1	472.264	943.532	-11.5	133572	HCD (High Energy Collision Dissociation)	30	MS2	8.4352	2408	Yang-C-3-20230914.raw	F7		1.44
		FALSE	High	Sequest HT (A4)	Unambiguous	[R].KSTGGkAPR.[K]	K6(Acetyla)	1	H3	H3	2	2	0.4958	1	472.276	943.532	13.79	363748	HCD (High Energy Collision Dissociation)	30	MS2	9.5358	3100	Yang-N-2-20230914.raw	F2		1.19
		FALSE	High	Sequest HT (A4)	Unambiguous	[R].KSTGGkAPR.[K]	K6(Acetyla)	1	H3	H3	2	2	0.6134	1	472.262	943.532	-15.19	113610	HCD (High Energy Collision Dissociation)	30	MS2	7.5716	2133	Yang-C-3-20230914.raw	F7		1.19
		FALSE	High	Sequest HT (A4)	Unambiguous	[R].KSTGGkAPR.[K]	K6(Acetyla)	1	H3	H3	2	2	0.3772	1	472.262	943.532	-15.7	23493.6	HCD (High Energy Collision Dissociation)	30	MS2	14.9858	5717	Yang-N-2-20230914.raw	F2		1.14
		FALSE	High	Sequest HT (A4)	Unambiguous	[R].KSTGGkAPR.[K]	K6(Acetyla)	1	H3	H3	2	2	0.625	1	472.275	943.532	10.88	934344	HCD (High Energy Collision Dissociation)	30	MS2	9.5708	3177	Yang-N-1-20230914.raw	F3		1.12
		FALSE	High	Sequest HT (A4)	Unambiguous	[R].KSTGGkAPR.[K]	K6(Acetyla)	1	H3	H3	2	2	0.4182	1	472.273	943.532	6.42	502008	HCD (High Energy Collision Dissociation)	30	MS2	9.793	2793	Yang-C-1-20230914.raw	F9		1.1
		FALSE	High	Sequest HT (A4)	Unambiguous	[R].KSTGGkAPR.[K]	K6(Acetyla)	1	H3	H3	2	2	0.7944	1	472.261	943.532	-18.55	95600	HCD (High Energy Collision Dissociation)	30	MS2	8.1259	2632	Yang-N-1-20230914.raw	F3		1.07
	FALSE	High	[K].DIQLAR.[R]		1	1	9	H3	H3 [124-129]		0	715.41	1.051	13.8	108.3	103.1	24.71	28.55	445148	647115	288088	854167	722886	411703	813957	888161	537950	854167	774675	474584		High	Peak Found	Peak Found	High	High	High	High	1.53	15.69
		Checked	Confidence	Identifying Node	PSM Ambiguity	Annotated Sequence	Modifications	# Proteins	Master Protein Accessions	Protein Accessions	# Missed Cleavages	Charge	DeltaScore	Rank	m/z [Da]	Theo. MH+ [Da]	DeltaM [ppm]	Intensity	Activation Type	NCE [%]	MS Order	RT [min]	First Scan	Spectrum File	File ID	Quan Info	XCorr
		FALSE	High	Sequest HT (A4)	Unambiguous	[K].DIQLAR.[R]		1	H3	H3	0	2	1	1	358.204	715.41	-13.14	1.02166e+06	HCD (High Energy Collision Dissociation)	30	MS2	15.7385	5649	Yang-C-3-20230914.raw	F7		1.53
		FALSE	High	Sequest HT (A4)	Unambiguous	[K].DIQLAR.[R]		1	H3	H3	0	2	1	1	358.201	715.41	-19.96	180701	HCD (High Energy Collision Dissociation)	30	MS2	15.5745	6025	Yang-N-2-20230914.raw	F2		1.27
		FALSE	High	Sequest HT (A4)	Unambiguous	[K].DIQLAR.[R]		1	H3	H3	0	2	1	1	358.202	715.41	-18.26	46176.5	HCD (High Energy Collision Dissociation)	30	MS2	16.8778	6798	Yang-N-1-20230914.raw	F3		1.22
		FALSE	High	Sequest HT (A4)	Unambiguous	[K].DIQLAR.[R]		1	H3	H3	0	2	1	1	358.202	715.41	-17.23	127547	HCD (High Energy Collision Dissociation)	30	MS2	15.6462	4545	Yang-E-2-20230914.raw	F5		1.18
		FALSE	High	Sequest HT (A4)	Unambiguous	[K].DIQLAR.[R]		1	H3	H3	0	2	1	1	358.203	715.41	-15.95	28160.6	HCD (High Energy Collision Dissociation)	30	MS2	17.0785	6863	Yang-N-3-20230914.raw	F1		1.18
		FALSE	High	Sequest HT (A4)	Unambiguous	[K].DIQLAR.[R]		1	H3	H3	0	2	1	1	358.201	715.41	-19.79	9087.57	HCD (High Energy Collision Dissociation)	30	MS2	16.5458	6600	Yang-N-3-20230914.raw	F1		1.16
		FALSE	High	Sequest HT (A4)	Unambiguous	[K].DIQLAR.[R]		1	H3	H3	0	2	1	1	358.203	715.41	-14.84	89007.4	HCD (High Energy Collision Dissociation)	30	MS2	15.6039	6153	Yang-N-1-20230914.raw	F3		1.13
		FALSE	High	Sequest HT (A4)	Unambiguous	[K].DIQLAR.[R]		1	H3	H3	0	2	1	1	358.202	715.41	-17.57	21680.7	HCD (High Energy Collision Dissociation)	30	MS2	16.8517	6684	Yang-N-2-20230914.raw	F2		1.09
		FALSE	High	Sequest HT (A4)	Unambiguous	[K].DIQLAR.[R]		1	H3	H3	0	2	1	1	358.202	715.41	-18.68	24957.4	HCD (High Energy Collision Dissociation)	30	MS2	16.9273	6720	Yang-N-2-20230914.raw	F2		1.08
	FALSE	High	[R].LVREIAQDFKTDLR.[F]		1	1	2	H3	H3 [71-84]		2	1703.94																			No Quan Values	High	n/a	n/a	n/a	n/a	High	High	1.51
		Checked	Confidence	Identifying Node	PSM Ambiguity	Annotated Sequence	Modifications	# Proteins	Master Protein Accessions	Protein Accessions	# Missed Cleavages	Charge	DeltaScore	Rank	m/z [Da]	Theo. MH+ [Da]	DeltaM [ppm]	Intensity	Activation Type	NCE [%]	MS Order	RT [min]	First Scan	Spectrum File	File ID	Quan Info	XCorr
		FALSE	High	Sequest HT (A4)	Unambiguous	[R].LVREIAQDFKTDLR.[F]		1	H3	H3	2	3	1	1	568.644	1703.94	-15.66	48007.1	HCD (High Energy Collision Dissociation)	30	MS2	23.4975	10053	Yang-N-1-20230914.raw	F3		1.51
		FALSE	High	Sequest HT (A4)	Unambiguous	[R].LVREIAQDFKTDLR.[F]		1	H3	H3	2	4	1	1	426.737	1703.94	-10.33	30819.2	HCD (High Energy Collision Dissociation)	30	MS2	20.6826	8060	Yang-C-3-20230914.raw	F7		1.14
	FALSE	High	[R].VTIMPKDIQLARR.[I]	1xOxidation [M4]	1	1	3	H3	H3 [118-130]		2	1556.89	0.777	11.85	94	117.6	9.6	10.18	67473.4	80742.6	54603.7	131308	148735	120248	123376	110819	101962	131308	159390	138614		High	Peak Found	Peak Found	High	High	Peak Found	High	1.48	16.53
		Checked	Confidence	Identifying Node	PSM Ambiguity	Annotated Sequence	Modifications	# Proteins	Master Protein Accessions	Protein Accessions	# Missed Cleavages	Charge	DeltaScore	Rank	m/z [Da]	Theo. MH+ [Da]	DeltaM [ppm]	Intensity	Activation Type	NCE [%]	MS Order	RT [min]	First Scan	Spectrum File	File ID	Quan Info	XCorr
		FALSE	High	Sequest HT (A4)	Unambiguous	[R].VTImPKDIQLARR.[I]	M4(Oxidation)	1	H3	H3	2	4	0.8378	1	389.975	1556.89	-9.67	64062.4	HCD (High Energy Collision Dissociation)	30	MS2	16.5753	6048	Yang-C-3-20230914.raw	F7		1.48
		FALSE	High	Sequest HT (A4)	Unambiguous	[R].VTImPKDIQLARR.[I]	M4(Oxidation)	1	H3	H3	2	4	0.843	1	389.972	1556.89	-17.98	73258.4	HCD (High Energy Collision Dissociation)	30	MS2	16.615	6634	Yang-N-3-20230914.raw	F1		1.21
		FALSE	High	Sequest HT (A4)	Unambiguous	[R].VTImPKDIQLARR.[I]	M4(Oxidation)	1	H3	H3	2	4	0.7087	1	389.972	1556.89	-16.89	128075	HCD (High Energy Collision Dissociation)	30	MS2	16.3628	6433	Yang-N-2-20230914.raw	F2		1.03
	FALSE	High	[R].YRPGTVALREIR.[K]		1	1	3	H3	H3 [42-53]		1	1430.82	1.216	12.22	112.5	91.2	8.2	10.42	2.58387e+06	3.89275e+06	2.96854e+06	4.33005e+06	3.62621e+06	4154744	4.72462e+06	5.34278e+06	5.54318e+06	4.33005e+06	3.886e+06	4.78931e+06		Peak Found	Peak Found	Peak Found	Peak Found	Peak Found	High	High	1.43	15.54
		Checked	Confidence	Identifying Node	PSM Ambiguity	Annotated Sequence	Modifications	# Proteins	Master Protein Accessions	Protein Accessions	# Missed Cleavages	Charge	DeltaScore	Rank	m/z [Da]	Theo. MH+ [Da]	DeltaM [ppm]	Intensity	Activation Type	NCE [%]	MS Order	RT [min]	First Scan	Spectrum File	File ID	Quan Info	XCorr
		FALSE	High	Sequest HT (A4)	Unambiguous	[R].YRPGTVALREIR.[K]		1	H3	H3	1	3	1	1	477.604	1430.82	-17.48	26079.3	HCD (High Energy Collision Dissociation)	30	MS2	15.5595	4505	Yang-E-2-20230914.raw	F5		1.43
		FALSE	High	Sequest HT (A4)	Unambiguous	[R].YRPGTVALREIR.[K]		1	H3	H3	1	3	1	1	477.604	1430.82	-17.23	63087.2	HCD (High Energy Collision Dissociation)	30	MS2	15.5435	4454	Yang-E-1-20230914.raw	F6		1.4
		FALSE	High	Sequest HT (A4)	Unambiguous	[R].YRPGTVALREIR.[K]		1	H3	H3	1	3	1	1	477.604	1430.82	-17.8	52292.8	HCD (High Energy Collision Dissociation)	30	MS2	15.237	5966	Yang-N-1-20230914.raw	F3		1.23
	FALSE	High	[K].YQKSTELLIR.[K]	1xAcetylation [K3]	1	1	1	H3	H3 [55-64]	H3 1xAcetylation [K57]	1	1292.72	0.955	9.41	92.9	91.5	18.92	3.91	521332	490209	512354	939422	872602	869311	953259	672809	956723	939422	935117	1.00208e+06		High	Peak Found	Peak Found	Peak Found	Peak Found	Peak Found	High	1.42	25.27
		Checked	Confidence	Identifying Node	PSM Ambiguity	Annotated Sequence	Modifications	# Proteins	Master Protein Accessions	Protein Accessions	# Missed Cleavages	Charge	DeltaScore	Rank	m/z [Da]	Theo. MH+ [Da]	DeltaM [ppm]	Intensity	Activation Type	NCE [%]	MS Order	RT [min]	First Scan	Spectrum File	File ID	Quan Info	XCorr
		FALSE	High	Sequest HT (A4)	Unambiguous	[K].YQkSTELLIR.[K]	K3(Acetyla)	1	H3	H3	1	2	1	1	646.859	1292.72	-8.6	78944.5	HCD (High Energy Collision Dissociation)	30	MS2	25.2267	10329	Yang-C-3-20230914.raw	F7		1.42
	FALSE	High	[K].QLATKAAR.[K]		1	1	1	H3	H3 [20-27]		1	858.516	1.578	14.82	183.6	116.4	15.32	9.62	1.24101e+06	1.48804e+06	1.47193e+06	1.43825e+06	1233400	1.38824e+06	2.2692e+06	2.04233e+06	2.74855e+06	1.43825e+06	1.32176e+06	1.60027e+06		High	Peak Found	Peak Found	Peak Found	Peak Found	Peak Found	High	1.42	9.16
		Checked	Confidence	Identifying Node	PSM Ambiguity	Annotated Sequence	Modifications	# Proteins	Master Protein Accessions	Protein Accessions	# Missed Cleavages	Charge	DeltaScore	Rank	m/z [Da]	Theo. MH+ [Da]	DeltaM [ppm]	Intensity	Activation Type	NCE [%]	MS Order	RT [min]	First Scan	Spectrum File	File ID	Quan Info	XCorr
		FALSE	High	Sequest HT (A4)	Unambiguous	[K].QLATKAAR.[K]		1	H3	H3	1	2	1	1	429.755	858.516	-14.53	1.34218e+06	HCD (High Energy Collision Dissociation)	30	MS2	9.1759	2634	Yang-C-3-20230914.raw	F7		1.42
	FALSE	High	[R].KSTGGKAPR.[K]	2xAcetylation [K1; K6]	1	1	3	H3	H3 [10-18]	H3 2xAcetylation [K10; K15]	2	985.543																			No Quan Values	n/a	n/a	n/a	n/a	n/a	n/a	High	1.38
		Checked	Confidence	Identifying Node	PSM Ambiguity	Annotated Sequence	Modifications	# Proteins	Master Protein Accessions	Protein Accessions	# Missed Cleavages	Charge	DeltaScore	Rank	m/z [Da]	Theo. MH+ [Da]	DeltaM [ppm]	Intensity	Activation Type	NCE [%]	MS Order	RT [min]	First Scan	Spectrum File	File ID	Quan Info	XCorr
		FALSE	High	Sequest HT (A4)	Unambiguous	[R].kSTGGkAPR.[K]	K1(Acetyla); K6(Acetyla)	1	H3	H3	2	2	0.8913	1	493.271	985.543	-7.86	3248606	HCD (High Energy Collision Dissociation)	30	MS2	9.7732	2215	Yang-E-3-20230914.raw	F4		1.38
		FALSE	High	Sequest HT (A4)	Unambiguous	[R].kSTGGkAPR.[K]	K1(Acetyla); K6(Acetyla)	1	H3	H3	2	2	0.8824	1	493.267	985.543	-16.71	919624	HCD (High Energy Collision Dissociation)	30	MS2	9.8895	2324	Yang-E-2-20230914.raw	F5		1.19
		FALSE	High	Sequest HT (A4)	Unambiguous	[R].kSTGGkAPR.[K]	K1(Acetyla); K6(Acetyla)	1	H3	H3	2	2	0.8983	1	493.266	985.543	-17.83	409401	HCD (High Energy Collision Dissociation)	30	MS2	9.8277	2208	Yang-E-1-20230914.raw	F6		1.18
	FALSE	High	[-].MARTKQTAR.[K]		1	1	1	H3	H3 [1-9]		2	1062.58	5.384	120.99	261.1	36.2	77.99	46.33	589857	54845.4	494883	128000	70918.9	173777	1.07856e+06	75274.9	924099	128000	75999.6	200318		Peak Found	Peak Found	High	Peak Found	Peak Found	Peak Found	High	1.35	9.89
		Checked	Confidence	Identifying Node	PSM Ambiguity	Annotated Sequence	Modifications	# Proteins	Master Protein Accessions	Protein Accessions	# Missed Cleavages	Charge	DeltaScore	Rank	m/z [Da]	Theo. MH+ [Da]	DeltaM [ppm]	Intensity	Activation Type	NCE [%]	MS Order	RT [min]	First Scan	Spectrum File	File ID	Quan Info	XCorr
		FALSE	High	Sequest HT (A4)	Unambiguous	[-].MARTKQTAR.[K]		1	H3	H3	2	3	1	1	354.867	1062.58	2.45	1.89977e+06	HCD (High Energy Collision Dissociation)	30	MS2	10.0358	2916	Yang-C-1-20230914.raw	F9		1.35
	FALSE	High	[K].STELLIR.[K]		1	1	7	H3	H3 [58-64]		0	831.493	1.324	18.3	123.1	93	21.43	8.28	232945	217223	245052	286469	300312	292723	425941	298137	457588	286469	321827	337431		High	High	High	High	High	High	High	1.33	20.02
		Checked	Confidence	Identifying Node	PSM Ambiguity	Annotated Sequence	Modifications	# Proteins	Master Protein Accessions	Protein Accessions	# Missed Cleavages	Charge	DeltaScore	Rank	m/z [Da]	Theo. MH+ [Da]	DeltaM [ppm]	Intensity	Activation Type	NCE [%]	MS Order	RT [min]	First Scan	Spectrum File	File ID	Quan Info	XCorr
		FALSE	High	Sequest HT (A4)	Unambiguous	[K].STELLIR.[K]		1	H3	H3	0	2	1	1	416.243	831.493	-18.48	189549	HCD (High Energy Collision Dissociation)	30	MS2	19.9984	8326	Yang-N-3-20230914.raw	F1		1.33
		FALSE	High	Sequest HT (A4)	Unambiguous	[K].STELLIR.[K]		1	H3	H3	0	2	1	1	416.245	831.493	-12.39	183033	HCD (High Energy Collision Dissociation)	30	MS2	20.0973	7764	Yang-C-3-20230914.raw	F7		1.21
		FALSE	High	Sequest HT (A4)	Unambiguous	[K].STELLIR.[K]		1	H3	H3	0	2	1	1	416.242	831.493	-19.88	172812	HCD (High Energy Collision Dissociation)	30	MS2	20.009	8256	Yang-N-2-20230914.raw	F2		1.18
		FALSE	High	Sequest HT (A4)	Unambiguous	[K].STELLIR.[K]		1	H3	H3	0	1	1	1	831.478	831.493	-18.32	151293	HCD (High Energy Collision Dissociation)	30	MS2	19.5602	7627	Yang-C-2-20230914.raw	F8		1.15
		FALSE	High	Sequest HT (A4)	Unambiguous	[K].STELLIR.[K]		1	H3	H3	0	2	1	1	416.243	831.493	-17.68	219236	HCD (High Energy Collision Dissociation)	30	MS2	20.0626	8400	Yang-N-1-20230914.raw	F3		1.14
		FALSE	High	Sequest HT (A4)	Unambiguous	[K].STELLIR.[K]		1	H3	H3	0	2	1	1	416.242	831.493	-19.66	180647	HCD (High Energy Collision Dissociation)	30	MS2	20.0997	7890	Yang-C-1-20230914.raw	F9		1.12
		FALSE	High	Sequest HT (A4)	Unambiguous	[K].STELLIR.[K]		1	H3	H3	0	1	1	1	831.481	831.493	-15.24	25224.7	HCD (High Energy Collision Dissociation)	30	MS2	19.5004	6124	Yang-E-2-20230914.raw	F5		0.53
	FALSE	High	[K].RVTIMPK.[D]		1	1	1	H3	H3 [117-123]		1	844.507	1.122	10.29	129.4	115.3	16.34	13.03	165457	170477	173260	277617	202132	233968	302539	233979	323530	277617	216613	269703		High	Peak Found	Peak Found	Peak Found	Peak Found	Peak Found	High	1.28	11.47
		Checked	Confidence	Identifying Node	PSM Ambiguity	Annotated Sequence	Modifications	# Proteins	Master Protein Accessions	Protein Accessions	# Missed Cleavages	Charge	DeltaScore	Rank	m/z [Da]	Theo. MH+ [Da]	DeltaM [ppm]	Intensity	Activation Type	NCE [%]	MS Order	RT [min]	First Scan	Spectrum File	File ID	Quan Info	XCorr
		FALSE	High	Sequest HT (A4)	Unambiguous	[K].RVTIMPK.[D]		1	H3	H3	1	2	1	1	422.751	844.507	-14.54	145227	HCD (High Energy Collision Dissociation)	30	MS2	11.4017	3548	Yang-C-3-20230914.raw	F7		1.28
	FALSE	High	[K].RVTIMPK.[D]	1xOxidation [M5]	1	1	2	H3	H3 [117-123]		1	860.502	1.421	63.94	95.7	67.3	10.26	92.89	197157	219974	195365	445965	7947.05	220038	360503	301912	364806	445965	8516.39	253645		High	Peak Found	Peak Found	Peak Found	Peak Found	High	High	1.28	9.87
		Checked	Confidence	Identifying Node	PSM Ambiguity	Annotated Sequence	Modifications	# Proteins	Master Protein Accessions	Protein Accessions	# Missed Cleavages	Charge	DeltaScore	Rank	m/z [Da]	Theo. MH+ [Da]	DeltaM [ppm]	Intensity	Activation Type	NCE [%]	MS Order	RT [min]	First Scan	Spectrum File	File ID	Quan Info	XCorr
		FALSE	High	Sequest HT (A4)	Unambiguous	[K].RVTImPK.[D]	M5(Oxidation)	1	H3	H3	1	2	1	1	430.748	860.502	-16.87	495684	HCD (High Energy Collision Dissociation)	30	MS2	9.876	3349	Yang-N-1-20230914.raw	F3		1.28
		FALSE	High	Sequest HT (A4)	Unambiguous	[K].RVTImPK.[D]	M5(Oxidation)	1	H3	H3	1	2	1	1	430.752	860.502	-6.87	433571	HCD (High Energy Collision Dissociation)	30	MS2	10.1151	3002	Yang-C-3-20230914.raw	F7		1.1
	FALSE	High	[K].STELLIRKLPFQR.[L]		1	1	1	H3	H3 [58-70]		2	1600.95	0.897	23.75	83.7	93.3	26.22	18.16	89868.9	82790.4	104791	183173	127821	170582	164326	113629	195678	183173	136979	196636		High	Peak Found	Peak Found	Peak Found	Peak Found	Peak Found	High	1.27	25.13
		Checked	Confidence	Identifying Node	PSM Ambiguity	Annotated Sequence	Modifications	# Proteins	Master Protein Accessions	Protein Accessions	# Missed Cleavages	Charge	DeltaScore	Rank	m/z [Da]	Theo. MH+ [Da]	DeltaM [ppm]	Intensity	Activation Type	NCE [%]	MS Order	RT [min]	First Scan	Spectrum File	File ID	Quan Info	XCorr
		FALSE	High	Sequest HT (A4)	Unambiguous	[K].STELLIRKLPFQR.[L]		1	H3	H3	2	3	0.6457	1	534.318	1600.95	-8.92	7336.66	HCD (High Energy Collision Dissociation)	30	MS2	25.0283	10231	Yang-C-3-20230914.raw	F7		1.27
	FALSE	High	[K].AARKSAPTTGGVK.[K]		1	1	1	H3	H3 [25-37]		2	1243.71	1.478	35.61	93.4	63.2	8.64	36.67	209850	237591	181584	301970	129267	199039	383712	326093	339074	301970	138528	229439		High	Peak Found	Peak Found	Peak Found	Peak Found	Peak Found	High	1.26	9.53
		Checked	Confidence	Identifying Node	PSM Ambiguity	Annotated Sequence	Modifications	# Proteins	Master Protein Accessions	Protein Accessions	# Missed Cleavages	Charge	DeltaScore	Rank	m/z [Da]	Theo. MH+ [Da]	DeltaM [ppm]	Intensity	Activation Type	NCE [%]	MS Order	RT [min]	First Scan	Spectrum File	File ID	Quan Info	XCorr
		FALSE	High	Sequest HT (A4)	Unambiguous	[K].AARKSAPTTGGVK.[K]		1	H3	H3	2	3	1	1	415.237	1243.71	-12.05	66587.9	HCD (High Energy Collision Dissociation)	30	MS2	9.5519	2728	Yang-C-3-20230914.raw	F7		1.26
	FALSE	High	[R].EIAQDFK.[T]		1	1	1	H3	H3 [74-80]		0	850.431																			No Quan Values	High	n/a	n/a	n/a	n/a	n/a	High	1.25
		Checked	Confidence	Identifying Node	PSM Ambiguity	Annotated Sequence	Modifications	# Proteins	Master Protein Accessions	Protein Accessions	# Missed Cleavages	Charge	DeltaScore	Rank	m/z [Da]	Theo. MH+ [Da]	DeltaM [ppm]	Intensity	Activation Type	NCE [%]	MS Order	RT [min]	First Scan	Spectrum File	File ID	Quan Info	XCorr
		FALSE	High	Sequest HT (A4)	Unambiguous	[R].EIAQDFK.[T]		1	H3	H3	0	2	1	1	425.712	850.431	-15.19	107940	HCD (High Energy Collision Dissociation)	30	MS2	14.708	5143	Yang-C-3-20230914.raw	F7		1.25
	FALSE	High	[K].YQKSTELLIR.[K]		1	1	4	H3	H3 [55-64]		1	1250.71	2.104	15.01	158	75.1	7.98	20.24	1.66347e+06	2.053e+06	1.76975e+06	1.91231e+06	1.22474e+06	1.25382e+06	3.04166e+06	2.81773e+06	3.30466e+06	1.91231e+06	1.31248e+06	1.44532e+06		High	High	Peak Found	Peak Found	High	Peak Found	High	1.22	15.87
		Checked	Confidence	Identifying Node	PSM Ambiguity	Annotated Sequence	Modifications	# Proteins	Master Protein Accessions	Protein Accessions	# Missed Cleavages	Charge	DeltaScore	Rank	m/z [Da]	Theo. MH+ [Da]	DeltaM [ppm]	Intensity	Activation Type	NCE [%]	MS Order	RT [min]	First Scan	Spectrum File	File ID	Quan Info	XCorr
		FALSE	High	Sequest HT (A4)	Unambiguous	[K].YQKSTELLIR.[K]		1	H3	H3	1	2	1	1	625.851	1250.71	-11.86	588217	HCD (High Energy Collision Dissociation)	30	MS2	16.0461	5800	Yang-C-3-20230914.raw	F7		1.22
		FALSE	High	Sequest HT (A4)	Unambiguous	[K].YQKSTELLIR.[K]		1	H3	H3	1	2	1	1	625.848	1250.71	-17.13	3.11814e+06	HCD (High Energy Collision Dissociation)	30	MS2	15.9678	5889	Yang-C-2-20230914.raw	F8		1.22
		FALSE	High	Sequest HT (A4)	Unambiguous	[K].YQKSTELLIR.[K]		1	H3	H3	1	2	1	1	625.851	1250.71	-11.96	61986.7	HCD (High Energy Collision Dissociation)	30	MS2	16.3422	6423	Yang-N-2-20230914.raw	F2		1.17
		FALSE	High	Sequest HT (A4)	Unambiguous	[K].YQKSTELLIR.[K]		1	H3	H3	1	2	1	1	625.849	1250.71	-16.05	325329	HCD (High Energy Collision Dissociation)	30	MS2	15.909	4670	Yang-E-2-20230914.raw	F5		1.1
	FALSE	High	[R].KSTGGKAPR.[K]		1	1	7	H3	H3 [10-18]		2	901.521	1.547	24.69	135.4	91	19.33	10.26	313137	286248	242831	304759	237026	265142	572574	392873	453440	304759	254007	305638		High	High	High	High	High	High	High	1.2	13.84
		Checked	Confidence	Identifying Node	PSM Ambiguity	Annotated Sequence	Modifications	# Proteins	Master Protein Accessions	Protein Accessions	# Missed Cleavages	Charge	DeltaScore	Rank	m/z [Da]	Theo. MH+ [Da]	DeltaM [ppm]	Intensity	Activation Type	NCE [%]	MS Order				RT [min]	First Scan	Spectrum File
		FALSE	High	Sequest HT (A4)	Unambiguous	[R].KSTGGKAPR.[K]		1	H3	H3	2	2	0.675	1	451.261	901.521	-7.36	233904	HCD (High Energy Collision Dissociation)	30	MS2				13.9074	4849	Yang-C-2-20230914.raw
		FALSE	High	Sequest HT (A4)	Unambiguous	[R].KSTGGKAPR.[K]		1	H3	H3	2	2	0.6034	1	451.263	901.521	-2.75	117522	HCD (High Energy Collision Dissociation)	30	MS2				13.8529	5115	Yang-N-2-20230914.raw
		FALSE	High	Sequest HT (A4)	Unambiguous	[R].KSTGGKAPR.[K]		1	H3	H3	2	2	0.8522	1	451.263	901.521	-2.14	309532	HCD (High Energy Collision Dissociation)	30	MS2				13.8454	5239	Yang-N-1-20230914.raw
		FALSE	High	Sequest HT (A4)	Unambiguous	[R].KSTGGKAPR.[K]		1	H3	H3	2	2	0.4956	1	451.262	901.521	-5.8	198543	HCD (High Energy Collision Dissociation)	30	MS2				13.7992	5214	Yang-N-3-20230914.raw
		FALSE	High	Sequest HT (A4)	Unambiguous	[R].KSTGGKAPR.[K]		1	H3	H3	2	2	0.6422	1	451.265	901.521	0.63	286344	HCD (High Energy Collision Dissociation)	30	MS2				13.8831	4713	Yang-C-3-20230914.raw
		FALSE	High	Sequest HT (A4)	Unambiguous	[R].KSTGGKAPR.[K]		1	H3	H3	2	2	0.6574	1	451.261	901.521	-7.22	316762	HCD (High Energy Collision Dissociation)	30	MS2				13.9525	4872	Yang-C-2-20230914.raw
		FALSE	High	Sequest HT (A4)	Unambiguous	[R].KSTGGKAPR.[K]		1	H3	H3	2	2	0.5794	1	451.261	901.521	-8.17	281876	HCD (High Energy Collision Dissociation)	30	MS2				13.8529	4771	Yang-C-1-20230914.raw
	FALSE	High	[R].KQLATKAAR.[K]	2xAcetylation [K1; K6]	1	1	1	H3	H3 [19-27]	H3 2xAcetylation [K19; K24]	2	1070.63																			No Quan Values	n/a	n/a	n/a	n/a	n/a	High	High	1.14
		Checked	Confidence	Identifying Node	PSM Ambiguity	Annotated Sequence	Modifications	# Proteins	Master Protein Accessions	Protein Accessions	# Missed Cleavages	Charge	DeltaScore	Rank	m/z [Da]	Theo. MH+ [Da]	DeltaM [ppm]	Intensity	Activation Type	NCE [%]	MS Order				RT [min]	First Scan	Spectrum File
		FALSE	High	Sequest HT (A4)	Unambiguous	[R].kQLATkAAR.[K]	K1(Acetyla); K6(Acetyla)	1	H3	H3	2	2	0.8333	1	535.81	1070.63	-17.24	899822	HCD (High Energy Collision Dissociation)	30	MS2				14.0849	5365	Yang-N-1-20230914.raw

## Sheet: KSAPTTGGVKKPHR, K10-Acetylation
KSAPTTGGVKKPHR, K10-Acetylation
#1	b⁺	b²⁺	b³⁺	Seq.	y⁺	y²⁺	y³⁺	#2
1	129.10224	65.05476	43.70560	K				14
2	216.13427	108.57077	72.71627	S	1377.75972	689.38350	459.92476	13
3	287.17138	144.08933	96.39531	A	1290.72769	645.86749	430.91408	12
4	384.22415	192.61571	128.74623	P	1219.69058	610.34893	407.23504	11
5	485.27182	243.13955	162.42879	T	1122.63782	561.82255	374.88412	10
6	586.31950	293.66339	196.11135	T	1021.59014	511.29871	341.20156	9
7	643.34097	322.17412	215.11851	G	920.54246	460.77487	307.51900	8
8	700.36243	350.68485	234.12566	G	863.52100	432.26414	288.51185	7
9	799.43084	400.21906	267.14847	V	806.49953	403.75340	269.50470	6
10	969.53637	485.27182	323.85031	K-Acetylation	707.43112	354.21920	236.48189	5
11	1097.63133	549.31931	366.54863	K	537.32559	269.16643	179.78005	4
12	1194.68410	597.84569	398.89955	P	409.23063	205.11895	137.08173	3
13	1331.74301	666.37514	444.58585	H	312.17786	156.59257	104.73081	2
14				R	175.11895	88.06311	59.04450	1
