# Supplementary material for: Regulation of Disease-Resistance Genes against CWMV Infection by NbHAG1-Mediated H3K36ac
Source: Int J Mol Sci. 2024 Feb 28;25(5):2800. doi: 10.3390/ijms25052800 (PMC10931728; doi:10.3390/ijms25052800)
Supplement: Supplementary file 1 [file ijms-25-02800-s001.zip › ijms-2871725-supplementary/Table S3. LC-MS MS of OEHAG1 VS Nb.xls]

## Sheet: Proteins
Table S3. LC-MS/MS of OEHAG1 VS Nb
Checked	Protein FDR Confidence: Sequest HT	Master	Accession	Description	Exp. q-value: Sequest HT	Coverage [%]	# Peptides	# PSMs	# Unique Peptides	# AAs	MW [kDa]	calc. pI	Score Sequest HT: Sequest HT	# Peptides (by Search Engine): Sequest HT	# Razor Peptides	Abundance Ratio: (E) / (N)	Abundance Ratio Variability [%]: (E) / (N)	Abundances (Grouped): E	Abundances (Grouped): N	Abundances (Grouped) CV [%]: E	Abundances (Grouped) CV [%]: N	Abundance: F4: Sample, E	Abundance: F5: Sample, E	Abundance: F6: Sample, E	Abundance: F1: Sample, N	Abundance: F2: Sample, N	Abundance: F3: Sample, N	Abundances (Normalized): F4: Sample, E	Abundances (Normalized): F5: Sample, E	Abundances (Normalized): F6: Sample, E	Abundances (Normalized): F1: Sample, N	Abundances (Normalized): F2: Sample, N	Abundances (Normalized): F3: Sample, N	Found in Sample: F4: Sample, E	Found in Sample: F5: Sample, E	Found in Sample: F6: Sample, E	Found in Sample: F1: Sample, N	Found in Sample: F2: Sample, N	Found in Sample: F3: Sample, N	# Protein Groups	Modifications
FALSE	High	Master Protein	H3	H3	0	72	29	404	29	136	15.4	11.15	199.87	29	0	0.946	40.3	100	100	0	0	6.07708e+08	5.12938e+08	5.185e+08	2.17901e+09	2.03334e+09	1.8903e+09	2.17901e+09	2.17901e+09	2.17901e+09	2.17901e+09	2.17901e+09	2.17901e+09	High	High	High	High	High	High	1	Acetylation [K5; K10; K15; K19; K24; K28; K37; K38; K57; K65; K123]
	Checked	Confidence	Annotated Sequence	Modifications	# Protein Groups	# Proteins	# PSMs	Master Protein Accessions	Positions in Master Proteins	Modifications in Master Proteins	# Missed Cleavages	Theo. MH+ [Da]	Abundance Ratio: (E) / (N)	Abundance Ratio Variability [%]: (E) / (N)	Abundances (Grouped): E	Abundances (Grouped): N	Abundances (Grouped) CV [%]: E	Abundances (Grouped) CV [%]: N	Abundance: F4: Sample, E	Abundance: F5: Sample, E	Abundance: F6: Sample, E	Abundance: F1: Sample, N	Abundance: F2: Sample, N	Abundance: F3: Sample, N	Abundances (Normalized): F4: Sample, E	Abundances (Normalized): F5: Sample, E	Abundances (Normalized): F6: Sample, E	Abundances (Normalized): F1: Sample, N	Abundances (Normalized): F2: Sample, N	Abundances (Normalized): F3: Sample, N	Quan Info	Found in Sample: F4: Sample, E	Found in Sample: F5: Sample, E	Found in Sample: F6: Sample, E	Found in Sample: F1: Sample, N	Found in Sample: F2: Sample, N	Found in Sample: F3: Sample, N	Confidence (by Search Engine): Sequest HT	XCorr (by Search Engine): Sequest HT	Top Apex RT [min]
	FALSE	High	[K].RVTIMPKDIQLAR.[R]		1	1	15	H3	H3 [117-129]		2	1540.9	0.732	14.04	49.4	70	6.35	11.51	1.10077e+06	823792	857945	5.10616e+06	5.0302e+06	3.72763e+06	3.94696e+06	3.49955e+06	3.60554e+06	5.10616e+06	5.39057e+06	4.29696e+06		Peak Found	High	High	High	High	High	High	3.01	20.94
		Checked	Confidence	Identifying Node	PSM Ambiguity	Annotated Sequence	Modifications	# Proteins	Master Protein Accessions	Protein Accessions	# Missed Cleavages	Charge	DeltaCn	Search Engine Rank	MH+ [Da]	Theo. MH+ [Da]	Deltam/z [Da]	Intensity	Isolation Interference [%]	Comp. Voltage [V]	Ion Inject Time [ms]	RT [min]	First Scan	Spectrum File	# Protein Groups	Precursor Abundance	Apex RT [min]
		FALSE	High	Sequest HT (A4)	Unambiguous	[K].RVTIMPKDIQLAR.[R]		1	H3	H3	2	3	0	1	1540.87	1540.9	-0.00862	773507	1.26085	-55	100	20.9482	6826	Yang-E-1-20230914.raw	1	843895	20.95
		FALSE	High	Sequest HT (A4)	Unambiguous	[K].RVTIMPKDIQLAR.[R]		1	H3	H3	2	3	0	1	1540.88	1540.9	-0.00746	9805235	0.852618	-55	27.495	20.9994	8223	Yang-C-3-20230914.raw	1	7.14284e+06	20.93
		FALSE	High	Sequest HT (A4)	Unambiguous	[K].RVTIMPKDIQLAR.[R]		1	H3	H3	2	3	0	1	1540.87	1540.9	-0.00862	3.97443e+06	1.24631	-55	21.164	20.9895	8851	Yang-N-1-20230914.raw	1	3.65249e+06	20.93
		FALSE	High	Sequest HT (A4)	Unambiguous	[K].RVTIMPKDIQLAR.[R]		1	H3	H3	2	3	0	1	1540.88	1540.9	-0.00771	159702	20.5775	-55	100	20.8151	8127	Yang-C-3-20230914.raw	1	7.14284e+06	20.93
		FALSE	High	Sequest HT (A4)	Unambiguous	[K].RVTIMPKDIQLAR.[R]		1	H3	H3	2	3	0	1	1540.87	1540.9	-0.00899	28249.2	21.229	-55	100	20.909	6780	Yang-E-2-20230914.raw	1	811723	20.99
		FALSE	High	Sequest HT (A4)	Unambiguous	[K].RVTIMPKDIQLAR.[R]		1	H3	H3	2	3	0	1	1540.87	1540.9	-0.00929	138336	13.5574	-55	81.341	20.8322	8774	Yang-N-1-20230914.raw	1	3.65249e+06	20.93
		FALSE	High	Sequest HT (A4)	Unambiguous	[K].RVTIMPKDIQLAR.[R]		1	H3	H3	2	3	0	1	1540.87	1540.9	-0.00868	2322925	1.73593	-55	24.191	20.9414	8794	Yang-N-3-20230914.raw	1	5044425	20.95
		FALSE	High	Sequest HT (A4)	Unambiguous	[K].RVTIMPKDIQLAR.[R]		1	H3	H3	2	3	0	1	1540.88	1540.9	-0.00795	90596.2	20.6177	-55	100	21.4665	8460	Yang-C-3-20230914.raw	1	7.14284e+06	20.93
		FALSE	High	Sequest HT (A4)	Unambiguous	[K].RVTIMPKDIQLAR.[R]		1	H3	H3	2	3	0	1	1540.87	1540.9	-0.01015	77511.5	34.4236	-55	100	20.8544	8750	Yang-N-3-20230914.raw	1	5044425	20.95
		FALSE	High	Sequest HT (A4)	Unambiguous	[K].RVTIMPKDIQLAR.[R]		1	H3	H3	2	3	0	1	1540.87	1540.9	-0.00984	5089943	1.38607	-55	27.838	21.0003	8823	Yang-N-3-20230914.raw	1	5044425	20.95
		FALSE	High	Sequest HT (A4)	Unambiguous	[K].RVTIMPKDIQLAR.[R]		1	H3	H3	2	3	0	1	1540.87	1540.9	-0.00997	72711.7	26.9153	-55	100	20.7957	8633	Yang-N-2-20230914.raw	1	4977456	20.91
		FALSE	High	Sequest HT (A4)	Unambiguous	[K].RVTIMPKDIQLAR.[R]		1	H3	H3	2	3	0	1	1540.87	1540.9	-0.0096	76470.9	66.0137	-55	100	21.4508	9072	Yang-N-1-20230914.raw	1	3.65249e+06	20.93
		FALSE	High	Sequest HT (A4)	Unambiguous	[K].RVTIMPKDIQLAR.[R]		1	H3	H3	2	3	0	1	1540.87	1540.9	-0.01021	33265.2	93.0545	-55	100	21.5738	9105	Yang-N-3-20230914.raw	1	61738.4	21.47
		FALSE	High	Sequest HT (A4)	Unambiguous	[K].RVTIMPKDIQLAR.[R]		1	H3	H3	2	3	0	1	1540.88	1540.9	-0.00765	26598.3	85.2781	-55	100	21.7466	9086	Yang-N-2-20230914.raw	1
		FALSE	High	Sequest HT (A4)	Unambiguous	[K].RVTIMPKDIQLAR.[R]		1	H3	H3	2	3	0	1	1540.89	1540.9	-0.00258	35128.5	40.4645	-55	100	21.334	8393	Yang-C-3-20230914.raw	1
	FALSE	High	[R].KSAPTTGGVKKPHR.[Y]	1xAcetylation [K]	1	1	29	H3	H3 [28-41]	H3 1xAcetylation [K37]	2	1505.85	0.896	82.06	114	127.2	28.31	64.12	1.45109e+06	2167960	2.07046e+06	18415353	4280978	8.42147e+06	5.20308e+06	9.20972e+06	8.70119e+06	18415353	4.58768e+06	9.70771e+06		High	High	High	High	High	High	High	3.01	9.64
		Checked	Confidence	Identifying Node	PSM Ambiguity	Annotated Sequence	Modifications	# Proteins	Master Protein Accessions	Protein Accessions	# Missed Cleavages	Charge	DeltaCn	Search Engine Rank	MH+ [Da]	Theo. MH+ [Da]	Deltam/z [Da]	Intensity	Isolation Interference [%]	Comp. Voltage [V]	Ion Inject Time [ms]	RT [min]	First Scan	Spectrum File	# Protein Groups	Precursor Abundance	Apex RT [min]
		FALSE	High	Sequest HT (A4)	Unambiguous	[R].KSAPTTGGVkKPHR.[Y]	K10(Acetyla)	1	H3	H3	2	3	0	1	1505.86	1505.85	0.00137	323420	38.3146	-55	85.162	9.7889	2791	Yang-C-1-20230914.raw	1
		FALSE	High	Sequest HT (A4)	Unambiguous	[R].KSAPTTGGVkKPHR.[Y]	K10(Acetyla)	1	H3	H3	2	4	0	1	1505.86	1505.85	0.00102	4.39195e+06	25.5738	-55	10.235	9.7735	2778	Yang-C-1-20230914.raw	1	2403854	9.76
		FALSE	High	Sequest HT (A4)	Unambiguous	[R].KSAPTTGGVkKPHR.[Y]	K10(Acetyla)	1	H3	H3	2	3	0	1	1505.86	1505.85	0.00241	133849	48.2772	-55	19.974	9.5424	3108	Yang-N-2-20230914.raw	1
		FALSE	High	Sequest HT (A4)	Unambiguous	[R].KSAPTTGGVkKPHR.[Y]	K10(Acetyla)	1	H3	H3	2	4	0	1	1505.86	1505.85	0.0013	1.12063e+06	60.7823	-55	45.183	9.8672	2837	Yang-C-1-20230914.raw	1	2403854	9.76
		FALSE	High	Sequest HT (A4)	Unambiguous	[R].KSAPTTGGVkKPHR.[Y]	K10(Acetyla)	1	H3	H3	2	4	0	1	1505.86	1505.85	0.00133	170143	95.8988	-55	32.686	9.7873	3301	Yang-N-3-20230914.raw	1	17037002	9.62
		FALSE	High	Sequest HT (A4)	Unambiguous	[R].KSAPTTGGVkKPHR.[Y]	K10(Acetyla)	1	H3	H3	2	4	0	1	1505.87	1505.85	0.00322	63164.3	84.1561	-55	100	9.6508	2118	Yang-E-1-20230914.raw	1	1.93362e+06	9.7
		FALSE	High	Sequest HT (A4)	Unambiguous	[R].KSAPTTGGVkKPHR.[Y]	K10(Acetyla)	1	H3	H3	2	4	0	1	1505.88	1505.85	0.00533	407120	38.7128	-55	31.867	9.6344	2148	Yang-E-3-20230914.raw	1	1.35341e+06	9.62
		FALSE	High	Sequest HT (A4)	Unambiguous	[R].KSAPTTGGVkKPHR.[Y]	K10(Acetyla)	1	H3	H3	2	4	0	1	1505.87	1505.85	0.00466	451268	33.144	-55	54.025	9.8195	2858	Yang-C-3-20230914.raw	1	1.11791e+06	9.83
		FALSE	High	Sequest HT (A4)	Unambiguous	[R].KSAPTTGGVKkPHR.[Y]	K11(Acetyla)	1	H3	H3	2	3	0	1	1505.83	1505.85	-0.00757	15615	91.949	-55	19.974	9.5424	3108	Yang-N-2-20230914.raw	1
		FALSE	High	Sequest HT (A4)	Unambiguous	[R].KSAPTTGGVkKPHR.[Y]	K10(Acetyla)	1	H3	H3	2	4	0	1	1505.86	1505.85	0.00234	108049	53.6493	-55	4.835	9.4505	2808	Yang-C-2-20230914.raw	1	3.08352e+06	9.44
		FALSE	High	Sequest HT (A4)	Unambiguous	[R].KSAPTTGGVkKPHR.[Y]	K10(Acetyla)	1	H3	H3	2	4	0	1	1505.87	1505.85	0.00331	2963336	9.63528	-55	3.289	9.5371	3102	Yang-N-2-20230914.raw	1
		FALSE	High	Sequest HT (A4)	Unambiguous	[R].KSAPTTGGVkKPHR.[Y]	K10(Acetyla)	1	H3	H3	2	3	0	1	1505.87	1505.85	0.00375	116647	43.4495	-55	100	9.7483	2168	Yang-E-1-20230914.raw	1	136845	9.71
		FALSE	High	Sequest HT (A4)	Unambiguous	[R].KSAPTTGGVkKPHR.[Y]	K10(Acetyla)	1	H3	H3	2	3	0	1	1505.87	1505.85	0.00522	117249	39.1583	-55	100	9.6894	2176	Yang-E-3-20230914.raw	1
		FALSE	High	Sequest HT (A4)	Unambiguous	[R].KSAPTTGGVkKPHR.[Y]	K10(Acetyla)	1	H3	H3	2	4	0	1	1505.87	1505.85	0.00408	959447	26.2713	-55	28.166	9.7255	2815	Yang-C-3-20230914.raw	1	1.11791e+06	9.83
		FALSE	High	Sequest HT (A4)	Unambiguous	[R].KSAPTTGGVkKPHR.[Y]	K10(Acetyla)	1	H3	H3	2	4	0	1	1505.87	1505.85	0.00322	2966908	16	-55	70.472	9.8237	2291	Yang-E-2-20230914.raw	1	2167960	9.77
		FALSE	High	Sequest HT (A4)	Unambiguous	[R].KSAPTTGGVkKPHR.[Y]	K10(Acetyla)	1	H3	H3	2	3	0	1	1505.87	1505.85	0.00439	770939	37.9398	-55	13.256	9.5527	3158	Yang-N-1-20230914.raw	1
		FALSE	High	Sequest HT (A4)	Unambiguous	[R].KSAPTTGGVkKPHR.[Y]	K10(Acetyla)	1	H3	H3	2	4	0	1	1505.86	1505.85	0.00234	108049	48.7057	-55	5.198	9.4698	2829	Yang-C-2-20230914.raw	1	3.08352e+06	9.44
		FALSE	High	Sequest HT (A4)	Unambiguous	[R].KSAPTTGGVkKPHR.[Y]	K10(Acetyla)	1	H3	H3	2	4	0	1	1505.87	1505.85	0.00289	4.27416e+06	37.5055	-55	69	9.6325	3217	Yang-N-1-20230914.raw	1	7.78897e+06	9.54
		FALSE	High	Sequest HT (A4)	Unambiguous	[R].KSAPTTGGVkKPHR.[Y]	K10(Acetyla)	1	H3	H3	2	4	0	1	1505.86	1505.85	0.0013	21783804	22.9769	-55	11.213	9.6648	3227	Yang-N-3-20230914.raw	1	17037002	9.62
		FALSE	High	Sequest HT (A4)	Unambiguous	[R].KSAPTTGGVkKPHR.[Y]	K10(Acetyla)	1	H3	H3	2	3	0	1	1505.87	1505.85	0.00491	247944	14.7436	-55	100	9.8333	2296	Yang-E-2-20230914.raw	1
		FALSE	High	Sequest HT (A4)	Unambiguous	[R].KSAPTTGGVkKPHR.[Y]	K10(Acetyla)	1	H3	H3	2	4	0	1	1505.86	1505.85	0.00179	8.19033e+06	19.8045	-55	19.992	9.6921	3246	Yang-N-3-20230914.raw	1	17037002	9.62
		FALSE	High	Sequest HT (A4)	Unambiguous	[R].KSAPTTGGVKkPHR.[Y]	K11(Acetyla)	1	H3	H3	2	4	0	1	1505.84	1505.85	-0.00371	211783	96.9034	-55	69	9.6325	3217	Yang-N-1-20230914.raw	1
		FALSE	High	Sequest HT (A4)	Unambiguous	[R].KSAPTTGGVkKPHR.[Y]	K10(Acetyla)	1	H3	H3	2	4	0	1	1505.87	1505.85	0.00273	1196244	64.2194	-55	21.606	9.6023	3150	Yang-N-2-20230914.raw	1
		FALSE	High	Sequest HT (A4)	Unambiguous	[R].KSAPTTGGVkKPHR.[Y]	K10(Acetyla)	1	H3	H3	2	4	0	1	1505.87	1505.85	0.00276	56484.9	86.6028	-55	100	9.8972	2328	Yang-E-2-20230914.raw	1	2167960	9.77
		FALSE	High	Sequest HT (A4)	Unambiguous	[R].KSAPTTGGVkKPHR.[Y]	K10(Acetyla)	1	H3	H3	2	4	0	1	1505.83	1505.85	-0.00721	68130.3	86.0538	-55	100	9.621	2104	Yang-E-1-20230914.raw	1
		FALSE	High	Sequest HT (A4)	Unambiguous	[R].KSAPTTGGVkKPHR.[Y]	K10(Acetyla)	1	H3	H3	2	4	0	1	1505.87	1505.85	0.0031	739850	58.1383	-55	30.199	9.6666	3236	Yang-N-1-20230914.raw	1	7.78897e+06	9.54
		FALSE	High	Sequest HT (A4)	Unambiguous	[R].KSAPTTGGVkKPHR.[Y]	K10(Acetyla)	1	H3	H3	2	4	0	1	1505.86	1505.85	0.00118	18419992	11.8997	-55	7.069	9.676	3235	Yang-N-3-20230914.raw	1	17037002	9.62
		FALSE	High	Sequest HT (A4)	Unambiguous	[R].KSAPTTGGVkKPHR.[Y]	K10(Acetyla)	1	H3	H3	2	4	0	1	1505.87	1505.85	0.00298	180768	90.7988	-55	24.922	9.6824	3245	Yang-N-1-20230914.raw	1	7.78897e+06	9.54
		FALSE	High	Sequest HT (A4)	Unambiguous	[R].KSAPTTGGVkKPHR.[Y]	K10(Acetyla)	1	H3	H3	2	4	0	1	1505.88	1505.85	0.00554	30981.1	94.1344	-55	100	9.7791	2218	Yang-E-3-20230914.raw	1	1.35341e+06	9.62
	FALSE	High	[K].RVTIMPKDIQLAR.[R]	1xAcetylation [K7]	1	1	2	H3	H3 [117-129]	H3 1xAcetylation [K123]	2	1582.91	1.138	7.22	94.2	82.8	6.6	5.08	192979	171223	187492	629955	645371	554693	691951	727374	787942	629955	691607	639413		Peak Found	Peak Found	Peak Found	Peak Found	Peak Found	Peak Found	High	3	26.92
		Checked	Confidence	Identifying Node	PSM Ambiguity	Annotated Sequence	Modifications	# Proteins	Master Protein Accessions	Protein Accessions	# Missed Cleavages	Charge	DeltaCn	Search Engine Rank	MH+ [Da]	Theo. MH+ [Da]	Deltam/z [Da]	Intensity	Isolation Interference [%]	Comp. Voltage [V]	Ion Inject Time [ms]	RT [min]	First Scan	Spectrum File	# Protein Groups	Precursor Abundance	Apex RT [min]
		FALSE	High	Sequest HT (A4)	Unambiguous	[K].RVTIMPkDIQLAR.[R]	K7(Acetyla)	1	H3	H3	2	3	0	1	1582.88	1582.91	-0.00903	56113.3	23.4318	-55	100	26.8819	11147	Yang-C-3-20230914.raw	1	447155	26.93
		FALSE	High	Sequest HT (A4)	Unambiguous	[K].RVTIMPkDIQLAR.[R]	K7(Acetyla)	1	H3	H3	2	3	0	1	1582.88	1582.91	-0.00873	551103	27.6569	-55	100	26.9899	11204	Yang-C-3-20230914.raw	1	447155	26.93
	FALSE	High	[R].LVREIAQDFK.[T]		1	1	11	H3	H3 [71-80]		1	1218.68	1.279	11.59	108.9	90.5	11.26	4.23	1.34137e+06	1.36815e+06	1.14394e+06	3.75847e+06	3.73194e+06	3.5386e+06	4.80966e+06	5.81202e+06	4.80744e+06	3.75847e+06	3.9993e+06	4.07906e+06		Peak Found	Peak Found	High	High	Peak Found	High	High	2.74	19.37
		Checked	Confidence	Identifying Node	PSM Ambiguity	Annotated Sequence	Modifications	# Proteins	Master Protein Accessions	Protein Accessions	# Missed Cleavages	Charge	DeltaCn	Search Engine Rank	MH+ [Da]	Theo. MH+ [Da]	Deltam/z [Da]	Intensity	Isolation Interference [%]	Comp. Voltage [V]	Ion Inject Time [ms]	RT [min]	First Scan	Spectrum File	# Protein Groups	Precursor Abundance	Apex RT [min]
		FALSE	High	Sequest HT (A4)	Unambiguous	[R].LVREIAQDFK.[T]		1	H3	H3	1	3	0	1	1218.66	1218.68	-0.00801	474846	18.4475	-55	100	19.2279	7933	Yang-N-3-20230914.raw	1	3.46195e+06	19.28
		FALSE	High	Sequest HT (A4)	Unambiguous	[R].LVREIAQDFK.[T]		1	H3	H3	1	3	0	1	1218.66	1218.68	-0.00737	294958	31.8701	-55	58.896	19.2991	8013	Yang-N-1-20230914.raw	1
		FALSE	High	Sequest HT (A4)	Unambiguous	[R].LVREIAQDFK.[T]		1	H3	H3	1	3	0	1	1218.67	1218.68	-0.00618	1.3126e+06	20.5866	-55	100	19.3514	7385	Yang-C-3-20230914.raw	1	2.29816e+06	19.37
		FALSE	High	Sequest HT (A4)	Unambiguous	[R].LVREIAQDFK.[T]		1	H3	H3	1	3	0	1	1218.66	1218.68	-0.00642	2.76975e+06	0.742293	-55	42.407	19.3788	7399	Yang-C-3-20230914.raw	1	2.29816e+06	19.37
		FALSE	High	Sequest HT (A4)	Unambiguous	[R].LVREIAQDFK.[T]		1	H3	H3	1	3	0	1	1218.66	1218.68	-0.00737	294958	24.8262	-55	100	19.3229	8027	Yang-N-1-20230914.raw	1
		FALSE	High	Sequest HT (A4)	Unambiguous	[R].LVREIAQDFK.[T]		1	H3	H3	1	3	0	1	1218.66	1218.68	-0.00737	90808	9.54605	-55	100	19.3485	6081	Yang-E-1-20230914.raw	1	1.08337e+06	19.42
		FALSE	High	Sequest HT (A4)	Unambiguous	[R].LVREIAQDFK.[T]		1	H3	H3	1	3	0	1	1218.67	1218.68	-0.00539	70539.9	39.8294	-55	100	17.4148	6446	Yang-C-3-20230914.raw	1
		FALSE	High	Sequest HT (A4)	Unambiguous	[R].LVREIAQDFK.[T]		1	H3	H3	1	3	0	1	1218.66	1218.68	-0.00737	25644.7	76.2733	-55	100	18.5138	7621	Yang-N-1-20230914.raw	1	19207.6	18.48
		FALSE	High	Sequest HT (A4)	Unambiguous	[R].LVREIAQDFK.[T]		1	H3	H3	1	3	0	1	1218.66	1218.68	-0.0077	396030	20.7802	-55	100	19.5532	6184	Yang-E-1-20230914.raw	1	1.08337e+06	19.42
		FALSE	High	Sequest HT (A4)	Unambiguous	[R].LVREIAQDFK.[T]		1	H3	H3	1	3	0	1	1218.66	1218.68	-0.0081	88172.7	63.321	-55	100	17.3544	7033	Yang-N-1-20230914.raw	1	250629	17.41
		FALSE	High	Sequest HT (A4)	Unambiguous	[R].LVREIAQDFK.[T]		1	H3	H3	1	3	0	1	1218.67	1218.68	-0.0056	54473.1	76.9512	-55	100	19.6801	7554	Yang-C-3-20230914.raw	1	2.29816e+06	19.37
	FALSE	High	[R].VTIMPKDIQLAR.[R]		1	1	19	H3	H3 [118-129]		1	1384.8	0.822	20.45	73.1	81.7	11.83	21.08	1.12415e+06	1.07576e+06	1.21641e+06	4.90548e+06	4.76593e+06	6.14151e+06	4.03077e+06	4.56996e+06	5.11201e+06	4.90548e+06	5.10737e+06	7.07953e+06		High	High	High	High	High	High	High	2.72	23.63
		Checked	Confidence	Identifying Node	PSM Ambiguity	Annotated Sequence	Modifications	# Proteins	Master Protein Accessions	Protein Accessions	# Missed Cleavages	Charge	DeltaCn	Search Engine Rank	MH+ [Da]	Theo. MH+ [Da]	Deltam/z [Da]	Intensity	Isolation Interference [%]	Comp. Voltage [V]	Ion Inject Time [ms]	RT [min]	First Scan	Spectrum File	# Protein Groups	Precursor Abundance	Apex RT [min]
		FALSE	High	Sequest HT (A4)	Unambiguous	[R].VTIMPKDIQLAR.[R]		1	H3	H3	1	3	0	1	1384.78	1384.8	-0.00565	96028	28.2721	-55	100	23.5683	9508	Yang-C-3-20230914.raw	1	4.87946e+06	23.65
		FALSE	High	Sequest HT (A4)	Unambiguous	[R].VTIMPKDIQLAR.[R]		1	H3	H3	1	3	0	1	1384.77	1384.8	-0.0087	58468.6	54.3281	-55	100	23.5427	10075	Yang-N-1-20230914.raw	1	6.05357e+06	23.62
		FALSE	High	Sequest HT (A4)	Unambiguous	[R].VTIMPKDIQLAR.[R]		1	H3	H3	1	3	0	1	1384.78	1384.8	-0.00443	770376	10.2388	-55	100	23.7728	9608	Yang-C-3-20230914.raw	1	4.87946e+06	23.65
		FALSE	High	Sequest HT (A4)	Unambiguous	[R].VTIMPKDIQLAR.[R]		1	H3	H3	1	3	0	1	1384.77	1384.8	-0.00827	739117	24.9773	-55	100	23.7675	10185	Yang-N-3-20230914.raw	1	4842202	23.63
		FALSE	High	Sequest HT (A4)	Unambiguous	[R].VTIMPKDIQLAR.[R]		1	H3	H3	1	3	0	1	1384.77	1384.8	-0.00852	4.66556e+06	1.7851	-55	48.819	23.6999	10152	Yang-N-3-20230914.raw	1	4842202	23.63
		FALSE	High	Sequest HT (A4)	Unambiguous	[R].VTIMPKDIQLAR.[R]		1	H3	H3	1	3	0	1	1384.78	1384.8	-0.00769	4.60913e+06	2.9345	-55	100	23.7085	10154	Yang-N-1-20230914.raw	1	6.05357e+06	23.62
		FALSE	High	Sequest HT (A4)	Unambiguous	[R].VTIMPKDIQLAR.[R]		1	H3	H3	1	3	0	1	1384.77	1384.8	-0.00861	28321	49.9866	-55	100	23.568	9970	Yang-N-2-20230914.raw	1	4707241	23.65
		FALSE	High	Sequest HT (A4)	Unambiguous	[R].VTIMPKDIQLAR.[R]		1	H3	H3	1	3	0	1	1384.77	1384.8	-0.00831	34900.7	64.468	-55	100	23.5389	9956	Yang-N-2-20230914.raw	1	4707241	23.65
		FALSE	High	Sequest HT (A4)	Unambiguous	[R].VTIMPKDIQLAR.[R]		1	H3	H3	1	3	0	1	1384.78	1384.8	-0.00464	113094	61.9737	-55	100	23.8423	9642	Yang-C-3-20230914.raw	1	4.87946e+06	23.65
		FALSE	High	Sequest HT (A4)	Unambiguous	[R].VTIMPKDIQLAR.[R]		1	H3	H3	1	3	0	1	1384.77	1384.8	-0.0084	5143094	2.38542	-55	63.305	23.7272	10048	Yang-N-2-20230914.raw	1	4707241	23.65
		FALSE	High	Sequest HT (A4)	Unambiguous	[R].VTIMPKDIQLAR.[R]		1	H3	H3	1	3	0	1	1384.77	1384.8	-0.00885	25305.9	16.9571	-55	100	23.5341	7897	Yang-E-3-20230914.raw	1	1.1182e+06	23.63
		FALSE	High	Sequest HT (A4)	Unambiguous	[R].VTIMPKDIQLAR.[R]		1	H3	H3	1	3	0	1	1384.77	1384.8	-0.00794	212903	50.6989	-55	100	23.7978	9730	Yang-C-1-20230914.raw	1	4642940	23.63
		FALSE	High	Sequest HT (A4)	Unambiguous	[R].VTIMPKDIQLAR.[R]		1	H3	H3	1	3	0	1	1384.77	1384.8	-0.00873	1.0956e+06	6.30444	-55	100	23.6977	7962	Yang-E-3-20230914.raw	1	1.1182e+06	23.63
		FALSE	High	Sequest HT (A4)	Unambiguous	[R].VTIMPKDIQLAR.[R]		1	H3	H3	1	3	0	1	1384.77	1384.8	-0.008	22757.3	20.2287	-55	100	23.514	7949	Yang-E-1-20230914.raw	1	1.21641e+06	23.59
		FALSE	High	Sequest HT (A4)	Unambiguous	[R].VTIMPKDIQLAR.[R]		1	H3	H3	1	3	0	1	1384.77	1384.8	-0.00901	31387.5	44.5821	-55	100	23.5293	10068	Yang-N-3-20230914.raw	1	4842202	23.63
		FALSE	High	Sequest HT (A4)	Unambiguous	[R].VTIMPKDIQLAR.[R]		1	H3	H3	1	3	0	1	1384.77	1384.8	-0.00895	229243	19.3232	-55	100	23.726	7969	Yang-E-3-20230914.raw	1	1.1182e+06	23.63
		FALSE	High	Sequest HT (A4)	Unambiguous	[R].VTIMPKDIQLAR.[R]		1	H3	H3	1	3	0	1	1384.77	1384.8	-0.00788	50481.9	48.4371	-55	100	24.6627	10628	Yang-N-3-20230914.raw	1	63281.2	24.65
		FALSE	High	Sequest HT (A4)	Unambiguous	[R].VTIMPKDIQLAR.[R]		1	H3	H3	1	3	0	1	1384.77	1384.8	-0.00803	343344	13.6778	-55	100	23.737	8018	Yang-E-2-20230914.raw	1	1072058	23.63
		FALSE	High	Sequest HT (A4)	Unambiguous	[R].VTIMPKDIQLAR.[R]		1	H3	H3	1	3	0	1	1384.77	1384.8	-0.00861	603239	14.0173	-55	100	23.7725	9734	Yang-C-2-20230914.raw	1	7.99239e+06	23.63
	FALSE	High	[R].KYQKSTELLIR.[K]	1xAcetylation [K4]	1	1	4	H3	H3 [54-64]	H3 1xAcetylation [K57]	2	1420.82	1.203	15.29	97.5	77.7	14.71	12.74	105092	108266	120630		312669	348250	376819	459927	506953		335069	401439		Peak Found	Peak Found	High	n/a	High	High	High	2.53	20.31
		Checked	Confidence	Identifying Node	PSM Ambiguity	Annotated Sequence	Modifications	# Proteins	Master Protein Accessions	Protein Accessions	# Missed Cleavages	Charge	DeltaCn	Search Engine Rank	MH+ [Da]	Theo. MH+ [Da]	Deltam/z [Da]	Intensity	Isolation Interference [%]	Comp. Voltage [V]	Ion Inject Time [ms]	RT [min]	First Scan	Spectrum File	# Protein Groups	Precursor Abundance	Apex RT [min]
		FALSE	High	Sequest HT (A4)	Unambiguous	[R].KYQkSTELLIR.[K]	K4(Acetyla)	1	H3	H3	2	3	0	1	1420.8	1420.82	-0.00443	67461.4	13.8384	-55	100	20.2792	7855	Yang-C-3-20230914.raw	1
		FALSE	High	Sequest HT (A4)	Unambiguous	[R].KYQkSTELLIR.[K]	K4(Acetyla)	1	H3	H3	2	3	0	1	1420.79	1420.82	-0.00812	55669.8	39.4789	-55	100	20.2424	8368	Yang-N-2-20230914.raw	1	312669	20.27
		FALSE	High	Sequest HT (A4)	Unambiguous	[R].KYQkSTELLIR.[K]	K4(Acetyla)	1	H3	H3	2	3	0	1	1420.79	1420.82	-0.00809	73943.1	28.6193	-55	100	20.2772	8504	Yang-N-1-20230914.raw	1	348250	20.31
		FALSE	High	Sequest HT (A4)	Unambiguous	[R].KYQkSTELLIR.[K]	K4(Acetyla)	1	H3	H3	2	3	0	1	1420.79	1420.82	-0.00867	31573.8	30.3576	-55	100	20.2705	6507	Yang-E-1-20230914.raw	1	120630	20.31
	FALSE	High	[R].KSAPTTGGVKKPHR.[Y]		1	1	14	H3	H3 [28-41]		2	1463.84	0.298	76.58	56	187.7	29.77	70.59	231406	108711	140461	3.00035e+06	427301	1.71627e+06	829736	461815	590294	3.00035e+06	457914	1.9784e+06		High	High	High	High	High	High	High	2.44	9.56
		Checked	Confidence	Identifying Node	PSM Ambiguity	Annotated Sequence	Modifications	# Proteins	Master Protein Accessions	Protein Accessions	# Missed Cleavages	Charge	DeltaCn	Search Engine Rank	MH+ [Da]	Theo. MH+ [Da]	Deltam/z [Da]	Intensity	Isolation Interference [%]	Comp. Voltage [V]	Ion Inject Time [ms]	RT [min]	First Scan	Spectrum File	# Protein Groups	Precursor Abundance	Apex RT [min]
		FALSE	High	Sequest HT (A4)	Unambiguous	[R].KSAPTTGGVKKPHR.[Y]		1	H3	H3	2	4	0	1	1463.83	1463.84	-0.00347	407308	72.934	-55	100	9.5197	2091	Yang-E-3-20230914.raw	1	231406	9.49
		FALSE	High	Sequest HT (A4)	Unambiguous	[R].KSAPTTGGVKKPHR.[Y]		1	H3	H3	2	4	0	1	1463.82	1463.84	-0.00708	787977	48.1161	-55	34.454	9.7779	2784	Yang-C-1-20230914.raw	1	317915	9.76
		FALSE	High	Sequest HT (A4)	Unambiguous	[R].KSAPTTGGVKKPHR.[Y]		1	H3	H3	2	4	0	1	1463.83	1463.84	-0.00476	923467	28.1866	-55	14.274	9.5324	3095	Yang-N-2-20230914.raw	1
		FALSE	High	Sequest HT (A4)	Unambiguous	[R].KSAPTTGGVKKPHR.[Y]		1	H3	H3	2	4	0	1	1463.83	1463.84	-0.00393	131747	70.7471	-55	59.465	9.4958	2079	Yang-E-3-20230914.raw	1	231406	9.49
		FALSE	High	Sequest HT (A4)	Unambiguous	[R].KSAPTTGGVKKPHR.[Y]		1	H3	H3	2	3	0	1	1463.84	1463.84	4e-05	210528	90.4877	-55	10.738	9.5337	3097	Yang-N-2-20230914.raw	1
		FALSE	High	Sequest HT (A4)	Unambiguous	[R].KSAPTTGGVKKPHR.[Y]		1	H3	H3	2	4	0	1	1463.82	1463.84	-0.00692	5.04948e+06	99.6409	-55	72.057	9.5974	3196	Yang-N-1-20230914.raw	1	1.71627e+06	9.53
		FALSE	High	Sequest HT (A4)	Unambiguous	[R].KSAPTTGGVKKPHR.[Y]		1	H3	H3	2	4	0	1	1463.83	1463.84	-0.0047	671534	49.7241	-55	42.703	9.5784	2741	Yang-C-3-20230914.raw	1	205618	9.57
		FALSE	High	Sequest HT (A4)	Unambiguous	[R].KSAPTTGGVKKPHR.[Y]		1	H3	H3	2	4	0	1	1463.82	1463.84	-0.005	1.53864e+06	25.1834	-55	10.985	9.624	3192	Yang-N-3-20230914.raw	1
		FALSE	High	Sequest HT (A4)	Unambiguous	[R].KSAPTTGGVKKPHR.[Y]		1	H3	H3	2	3	0	1	1463.85	1463.84	0.00065	247244	90.8474	-55	5.786	9.6258	3195	Yang-N-3-20230914.raw	1
		FALSE	High	Sequest HT (A4)	Unambiguous	[R].KSAPTTGGVKKPHR.[Y]		1	H3	H3	2	4	0	1	1463.82	1463.84	-0.00607	302889	86.668	-55	100	9.5487	2068	Yang-E-1-20230914.raw	1
		FALSE	High	Sequest HT (A4)	Unambiguous	[R].KSAPTTGGVKKPHR.[Y]		1	H3	H3	2	4	0	1	1463.82	1463.84	-0.00683	156041	81.4764	-55	49.118	9.5109	2048	Yang-E-1-20230914.raw	1
		FALSE	High	Sequest HT (A4)	Unambiguous	[R].KSAPTTGGVKKPHR.[Y]		1	H3	H3	2	4	0	1	1463.82	1463.84	-0.00607	65938.5	74.1256	-55	100	9.5523	2158	Yang-E-2-20230914.raw	1
		FALSE	High	Sequest HT (A4)	Unambiguous	[R].KSAPTTGGVKKPHR.[Y]		1	H3	H3	2	3	0	1	1463.82	1463.84	-0.00771	30828.8	86.3189	-55	100	9.6464	2154	Yang-E-3-20230914.raw	1
		FALSE	High	Sequest HT (A4)	Unambiguous	[R].KSAPTTGGVKKPHR.[Y]		1	H3	H3	2	3	0	1	1463.82	1463.84	-0.00652	135139	78.589	-55	50.867	9.6748	2791	Yang-C-3-20230914.raw	1	119308	9.57
	FALSE	High	[R].EIAQDFKTDLR.[F]		1	1	38	H3	H3 [74-84]		1	1335.69	1.291	24.85	127.4	84.5	17.33	11.31	5.77634e+07	6.77029e+07	6.70057e+07	1.81987e+08	1.74348e+08	1.93297e+08	2.07118e+08	2.87609e+08	2.81594e+08	1.81987e+08	1.86838e+08	2.2282e+08		Peak Found	Peak Found	High	Peak Found	High	Peak Found	High	2.44	19.35
		Checked	Confidence	Identifying Node	PSM Ambiguity	Annotated Sequence	Modifications	# Proteins	Master Protein Accessions	Protein Accessions	# Missed Cleavages	Charge	DeltaCn	Search Engine Rank	MH+ [Da]	Theo. MH+ [Da]	Deltam/z [Da]	Intensity	Isolation Interference [%]	Comp. Voltage [V]	Ion Inject Time [ms]	RT [min]	First Scan	Spectrum File	# Protein Groups	Precursor Abundance	Apex RT [min]
		FALSE	High	Sequest HT (A4)	Unambiguous	[R].EIAQDFKTDLR.[F]		1	H3	H3	1	3	0	1	1335.67	1335.69	-0.00666	108198	45.2984	-55	100	20.9432	8193	Yang-C-3-20230914.raw	1
		FALSE	High	Sequest HT (A4)	Unambiguous	[R].EIAQDFKTDLR.[F]		1	H3	H3	1	3	0	1	1335.67	1335.69	-0.00739	176979792	0.170335	-55	1.026	19.4111	7417	Yang-C-3-20230914.raw	1	123667168	19.37
		FALSE	High	Sequest HT (A4)	Unambiguous	[R].EIAQDFKTDLR.[F]		1	H3	H3	1	3	0	1	1335.67	1335.69	-0.0052	154000	68.9784	-55	90.348	19.2531	7336	Yang-C-3-20230914.raw	1
		FALSE	High	Sequest HT (A4)	Unambiguous	[R].EIAQDFKTDLR.[F]		1	H3	H3	1	3	0	1	1335.67	1335.69	-0.00703	1.23484e+06	62.7668	-55	100	19.8449	7638	Yang-C-3-20230914.raw	1	123667168	19.37
		FALSE	High	Sequest HT (A4)	Unambiguous	[R].EIAQDFKTDLR.[F]		1	H3	H3	1	3	0	1	1335.67	1335.69	-0.00602	873925	49.1572	-55	68.976	19.7225	7574	Yang-C-3-20230914.raw	1	123667168	19.37
		FALSE	High	Sequest HT (A4)	Unambiguous	[R].EIAQDFKTDLR.[F]		1	H3	H3	1	3	0	1	1335.67	1335.69	-0.00672	53668348	6.81044	-55	18.095	19.4966	7463	Yang-C-3-20230914.raw	1	123667168	19.37
		FALSE	High	Sequest HT (A4)	Unambiguous	[R].EIAQDFKTDLR.[F]		1	H3	H3	1	3	0	1	1335.67	1335.69	-0.00608	4621736	6.1427	-55	100	19.5782	7504	Yang-C-3-20230914.raw	1	123667168	19.37
		FALSE	High	Sequest HT (A4)	Unambiguous	[R].EIAQDFKTDLR.[F]		1	H3	H3	1	3	0	1	1335.67	1335.69	-0.00764	716263	49.3302	-55	100	19.9271	7679	Yang-C-3-20230914.raw	1	123667168	19.37
		FALSE	High	Sequest HT (A4)	Unambiguous	[R].EIAQDFKTDLR.[F]		1	H3	H3	1	3	0	1	1335.67	1335.69	-0.00651	839567	11.1806	-55	100	19.6203	6215	Yang-E-1-20230914.raw	1
		FALSE	High	Sequest HT (A4)	Unambiguous	[R].EIAQDFKTDLR.[F]		1	H3	H3	1	3	0	1	1335.67	1335.69	-0.00636	138480	41.1123	-55	100	20.4417	7937	Yang-C-3-20230914.raw	1	123667168	19.37
		FALSE	High	Sequest HT (A4)	Unambiguous	[R].EIAQDFKTDLR.[F]		1	H3	H3	1	3	0	1	1335.67	1335.69	-0.00611	156653	30.4806	-55	100	20.3607	7897	Yang-C-3-20230914.raw	1	123667168	19.37
		FALSE	High	Sequest HT (A4)	Unambiguous	[R].EIAQDFKTDLR.[F]		1	H3	H3	1	3	0	1	1335.67	1335.69	-0.00694	126538688	13.0365	-55	3.709	19.4033	7414	Yang-C-3-20230914.raw	1	123667168	19.37
		FALSE	High	Sequest HT (A4)	Unambiguous	[R].EIAQDFKTDLR.[F]		1	H3	H3	1	3	0	1	1335.67	1335.69	-0.00556	2.25431e+06	14.1678	-55	99.621	19.6109	7520	Yang-C-3-20230914.raw	1
		FALSE	High	Sequest HT (A4)	Unambiguous	[R].EIAQDFKTDLR.[F]		1	H3	H3	1	3	0	1	1335.67	1335.69	-0.00776	260141	38.5415	-55	100	19.9625	6370	Yang-E-1-20230914.raw	1	194313	20.13
		FALSE	High	Sequest HT (A4)	Unambiguous	[R].EIAQDFKTDLR.[F]		1	H3	H3	1	3	0	1	1335.66	1335.69	-0.00846	4754337	21.0922	-55	86.418	19.52	6168	Yang-E-1-20230914.raw	1	66665728	19.36
		FALSE	High	Sequest HT (A4)	Unambiguous	[R].EIAQDFKTDLR.[F]		1	H3	H3	1	2	0	1	1335.68	1335.69	-0.00571	163984	27.3246	-55	100	20.2237	7828	Yang-C-3-20230914.raw	1	142385	20.19
		FALSE	High	Sequest HT (A4)	Unambiguous	[R].EIAQDFKTDLR.[F]		1	H3	H3	1	3	0	1	1335.67	1335.69	-0.00639	158053	73.4349	-55	100	19.1016	7263	Yang-C-3-20230914.raw	1	123667168	19.37
		FALSE	High	Sequest HT (A4)	Unambiguous	[R].EIAQDFKTDLR.[F]		1	H3	H3	1	3	0	1	1335.66	1335.69	-0.00861	889380	19.0459	-55	100	20.0071	8255	Yang-N-2-20230914.raw	1
		FALSE	High	Sequest HT (A4)	Unambiguous	[R].EIAQDFKTDLR.[F]		1	H3	H3	1	3	0	1	1335.67	1335.69	-0.00687	59269.9	67.153	-55	100	21.504	8479	Yang-C-3-20230914.raw	1	56892.7	21.43
		FALSE	High	Sequest HT (A4)	Unambiguous	[R].EIAQDFKTDLR.[F]		1	H3	H3	1	3	0	1	1335.67	1335.69	-0.00596	54338.8	61.957	-55	100	17.3882	6433	Yang-C-3-20230914.raw	1
		FALSE	High	Sequest HT (A4)	Unambiguous	[R].EIAQDFKTDLR.[F]		1	H3	H3	1	3	0	1	1335.67	1335.69	-0.00773	91496.6	50.4566	-55	100	21.0353	8242	Yang-C-3-20230914.raw	1
		FALSE	High	Sequest HT (A4)	Unambiguous	[R].EIAQDFKTDLR.[F]		1	H3	H3	1	3	0	1	1335.67	1335.69	-0.00602	65793.3	75.0622	-55	100	21.5306	8492	Yang-C-3-20230914.raw	1	56892.7	21.43
		FALSE	High	Sequest HT (A4)	Unambiguous	[R].EIAQDFKTDLR.[F]		1	H3	H3	1	3	0	1	1335.67	1335.69	-0.00739	176979792	45.4297	-55	13.913	19.4294	7428	Yang-C-3-20230914.raw	1	123667168	19.37
		FALSE	High	Sequest HT (A4)	Unambiguous	[R].EIAQDFKTDLR.[F]		1	H3	H3	1	3	0	1	1335.67	1335.69	-0.00544	45369.7	82.2744	-55	100	19.1874	7304	Yang-C-3-20230914.raw	1
		FALSE	High	Sequest HT (A4)	Unambiguous	[R].EIAQDFKTDLR.[F]		1	H3	H3	1	3	0	1	1335.67	1335.69	-0.00626	6919189	63.0813	-55	87.223	19.3122	7365	Yang-C-3-20230914.raw	1	123667168	19.37
		FALSE	High	Sequest HT (A4)	Unambiguous	[R].EIAQDFKTDLR.[F]		1	H3	H3	1	3	0	1	1335.67	1335.69	-0.00825	63495	81.425	-55	100	21.6159	9023	Yang-N-2-20230914.raw	1	92969.4	21.4
		FALSE	High	Sequest HT (A4)	Unambiguous	[R].EIAQDFKTDLR.[F]		1	H3	H3	1	3	0	1	1335.67	1335.69	-0.00776	49890.7	45.8837	-55	100	19.118	5987	Yang-E-1-20230914.raw	1	57929.4	19.04
		FALSE	High	Sequest HT (A4)	Unambiguous	[R].EIAQDFKTDLR.[F]		1	H3	H3	1	3	0	1	1335.66	1335.69	-0.00883	954251	39.6074	-55	55.426	19.7252	7711	Yang-C-2-20230914.raw	1
		FALSE	High	Sequest HT (A4)	Unambiguous	[R].EIAQDFKTDLR.[F]		1	H3	H3	1	3	0	1	1335.67	1335.69	-0.00837	46539.6	63.9858	-55	100	19.1019	5980	Yang-E-1-20230914.raw	1	57929.4	19.04
		FALSE	High	Sequest HT (A4)	Unambiguous	[R].EIAQDFKTDLR.[F]		1	H3	H3	1	3	0	1	1335.67	1335.69	-0.00758	9387002	6.36517	-55	10.769	19.316	6065	Yang-E-1-20230914.raw	1	57929.4	19.04
		FALSE	High	Sequest HT (A4)	Unambiguous	[R].EIAQDFKTDLR.[F]		1	H3	H3	1	3	0	1	1335.67	1335.69	-0.00791	225029	8.47226	-55	100	20.1373	6445	Yang-E-1-20230914.raw	1	194313	20.13
		FALSE	High	Sequest HT (A4)	Unambiguous	[R].EIAQDFKTDLR.[F]		1	H3	H3	1	3	0	1	1335.67	1335.69	-0.00837	74402.3	50.3786	-55	100	21.3572	8901	Yang-N-2-20230914.raw	1	92969.4	21.4
		FALSE	High	Sequest HT (A4)	Unambiguous	[R].EIAQDFKTDLR.[F]		1	H3	H3	1	3	0	1	1335.66	1335.69	-0.00886	1.67087e+06	19.6813	-55	69.745	19.6649	7669	Yang-C-1-20230914.raw	1
		FALSE	High	Sequest HT (A4)	Unambiguous	[R].EIAQDFKTDLR.[F]		1	H3	H3	1	3	0	1	1335.67	1335.69	-0.00819	294854	34.3479	-55	100	19.9044	6344	Yang-E-1-20230914.raw	1	66665728	19.36
		FALSE	High	Sequest HT (A4)	Unambiguous	[R].EIAQDFKTDLR.[F]		1	H3	H3	1	3	0	1	1335.67	1335.69	-0.00837	927249	82.5355	-55	100	19.2663	7477	Yang-C-2-20230914.raw	1	115356	18.96
		FALSE	High	Sequest HT (A4)	Unambiguous	[R].EIAQDFKTDLR.[F]		1	H3	H3	1	3	0	1	1335.66	1335.69	-0.00861	889380	32.5143	-55	100	20.0109	8257	Yang-N-2-20230914.raw	1
		FALSE	High	Sequest HT (A4)	Unambiguous	[R].EIAQDFKTDLR.[F]		1	H3	H3	1	3	0	1	1335.67	1335.69	-0.00672	53668348	57.8059	-55	91.067	19.4838	7455	Yang-C-3-20230914.raw	1	123667168	19.37
		FALSE	High	Sequest HT (A4)	Unambiguous	[R].EIAQDFKTDLR.[F]		1	H3	H3	1	3	0	1	1335.66	1335.69	-0.00855	48874.8	70.4283	-55	100	20.5567	6643	Yang-E-1-20230914.raw	1	194313	20.13
	FALSE	High	[R].KSAPTTGGVKKPHR.[Y]	2xAcetylation [K1; K10]	1	1	7	H3	H3 [28-41]	H3 2xAcetylation [K28; K37]	2	1547.87	0.538	81.62	72.4	134.8	56.13	73.33	56991	144176	188340	1.76657e+06	222014	988385	204348	612475	791504	1.76657e+06	237919	1.13934e+06		Peak Found	High	High	Peak Found	Peak Found	High	High	2.34	9.81
		Checked	Confidence	Identifying Node	PSM Ambiguity	Annotated Sequence	Modifications	# Proteins	Master Protein Accessions	Protein Accessions	# Missed Cleavages	Charge	DeltaCn	Search Engine Rank	MH+ [Da]	Theo. MH+ [Da]	Deltam/z [Da]	Intensity	Isolation Interference [%]	Comp. Voltage [V]	Ion Inject Time [ms]	RT [min]	First Scan	Spectrum File	# Protein Groups	Precursor Abundance	Apex RT [min]
		FALSE	High	Sequest HT (A4)	Unambiguous	[R].kSAPTTGGVkKPHR.[Y]	K1(Acetyla); K10(Acetyla)	1	H3	H3	2	4	0	1	1547.87	1547.87	0.00174	2.6181e+06	8.05673	-55	100	9.8227	3320	Yang-N-1-20230914.raw	1	988385	9.78
		FALSE	High	Sequest HT (A4)	Unambiguous	[R].kSAPTTGGVkKPHR.[Y]	K1(Acetyla); K10(Acetyla)	1	H3	H3	2	4	0	1	1547.87	1547.87	0.00021	1.1853e+06	20.4232	-55	55.938	10.0733	2937	Yang-C-1-20230914.raw	1
		FALSE	High	Sequest HT (A4)	Unambiguous	[R].kSAPTTGGVkKPHR.[Y]	K1(Acetyla); K10(Acetyla)	1	H3	H3	2	4	0	1	1547.87	1547.87	0.00192	232492	32.5056	-55	100	9.9049	2332	Yang-E-2-20230914.raw	1	144176	9.84
		FALSE	High	Sequest HT (A4)	Unambiguous	[R].kSAPTTGGVkKPHR.[Y]	K1(Acetyla); K10(Acetyla)	1	H3	H3	2	3	0	1	1547.88	1547.87	0.00499	31312.7	77.1119	-55	100	10.0294	2914	Yang-C-1-20230914.raw	1
		FALSE	High	Sequest HT (A4)	Unambiguous	[R].kSAPTTGGVkKPHR.[Y]	K1(Acetyla); K10(Acetyla)	1	H3	H3	2	4	0	1	1547.87	1547.87	0.00177	330828	28.1137	-55	100	9.8296	2209	Yang-E-1-20230914.raw	1	188340	9.79
		FALSE	High	Sequest HT (A4)	Unambiguous	[R].kSAPTTGGVkKPHR.[Y]	K1(Acetyla); K10(Acetyla)	1	H3	H3	2	4	0	1	1547.84	1547.87	-0.0054	3896.83	96.1681	-55	50.465	9.9631	2925	Yang-C-3-20230914.raw	1
		FALSE	High	Sequest HT (A4)	Unambiguous	[R].kSAPTTGGVkKPHR.[Y]	K1(Acetyla); K10(Acetyla)	1	H3	H3	2	4	0	1	1547.87	1547.87	0.0007	654164	33.5647	-55	100	9.7503	2975	Yang-C-2-20230914.raw	1
	FALSE	High	[R].KSAPTTGGVK.[K]		1	1	3	H3	H3 [28-37]		1	945.536	0.787	8.2	97.5	123.9	3.07	14.03		968097	936986	5115045	3823651	4.68169e+06		4.11258e+06	3.93772e+06	5115045	4.09758e+06	5.39674e+06		n/a	High	Peak Found	Peak Found	Peak Found	Peak Found	High	2.27	8.07
		Checked	Confidence	Identifying Node	PSM Ambiguity	Annotated Sequence	Modifications	# Proteins	Master Protein Accessions	Protein Accessions	# Missed Cleavages	Charge	DeltaCn	Search Engine Rank	MH+ [Da]	Theo. MH+ [Da]	Deltam/z [Da]	Intensity	Isolation Interference [%]	Comp. Voltage [V]	Ion Inject Time [ms]	RT [min]	First Scan	Spectrum File	# Protein Groups	Precursor Abundance	Apex RT [min]
		FALSE	High	Sequest HT (A4)	Unambiguous	[R].KSAPTTGGVK.[K]		1	H3	H3	1	2	0	1	945.522	945.536	-0.00705	1990756	0.61213	-55	100	8.1435	2322	Yang-C-3-20230914.raw	1	1775862	8.09
		FALSE	High	Sequest HT (A4)	Unambiguous	[R].KSAPTTGGVK.[K]		1	H3	H3	1	2	0	1	945.525	945.536	-0.00592	107859	41.4245	-55	100	9.6582	2781	Yang-C-3-20230914.raw	1
		FALSE	High	Sequest HT (A4)	Unambiguous	[R].KSAPTTGGVK.[K]		1	H3	H3	1	2	0	1	945.518	945.536	-0.00901	332121	4.51005	-55	100	8.2089	1813	Yang-E-2-20230914.raw	1	968097	8.06
	FALSE	High	[R].VTIMPKDIQLARR.[I]		1	1	4	H3	H3 [118-130]		2	1540.9	0.673	23.33	69.3	105.1	15.03	21.55	18994.1	21583.8	18417.5		94034.6	118845	68105.7	91690.3	77400.1		100771	136996		Peak Found	Peak Found	Peak Found	n/a	High	High	High	2.13	20.29
		Checked	Confidence	Identifying Node	PSM Ambiguity	Annotated Sequence	Modifications	# Proteins	Master Protein Accessions	Protein Accessions	# Missed Cleavages	Charge	DeltaCn	Search Engine Rank	MH+ [Da]	Theo. MH+ [Da]	Deltam/z [Da]	Intensity	Isolation Interference [%]	Comp. Voltage [V]	Ion Inject Time [ms]	RT [min]	First Scan	Spectrum File	# Protein Groups	Precursor Abundance	Apex RT [min]
		FALSE	High	Sequest HT (A4)	Unambiguous	[R].VTIMPKDIQLARR.[I]		1	H3	H3	2	4	0	1	1540.89	1540.9	-0.00302	98556.5	34.8027	-55	100	20.2755	7853	Yang-C-3-20230914.raw	1
		FALSE	High	Sequest HT (A4)	Unambiguous	[R].VTIMPKDIQLARR.[I]		1	H3	H3	2	4	0	1	1540.87	1540.9	-0.00687	47081.5	55.7815	-55	100	20.1937	8344	Yang-N-2-20230914.raw	1	94034.6	20.21
		FALSE	High	Sequest HT (A4)	Unambiguous	[R].VTIMPKDIQLARR.[I]		1	H3	H3	2	4	0	1	1540.87	1540.9	-0.00678	126968	36.4703	-55	100	20.3067	8518	Yang-N-1-20230914.raw	1	118845	20.29
		FALSE	High	Sequest HT (A4)	Unambiguous	[R].VTIMPKDIQLARR.[I]		1	H3	H3	2	4	0	1	1540.88	1540.9	-0.00519	80438.7	60.3426	-55	100	20.3158	7874	Yang-C-3-20230914.raw	1	70172.5	20.26
	FALSE	High	[R].KQLATKAAR.[K]	1xAcetylation [K6]	1	1	5	H3	H3 [19-27]	H3 1xAcetylation [K24]	2	1028.62																			No Quan Values	High	High	High	n/a	n/a	High	High	2.11
		Checked	Confidence	Identifying Node	PSM Ambiguity	Annotated Sequence	Modifications	# Proteins	Master Protein Accessions	Protein Accessions	# Missed Cleavages	Charge	DeltaCn	Search Engine Rank	MH+ [Da]	Theo. MH+ [Da]	Deltam/z [Da]	Intensity	Isolation Interference [%]	Comp. Voltage [V]	Ion Inject Time [ms]	RT [min]	First Scan	Spectrum File	# Protein Groups	Precursor Abundance	Apex RT [min]
		FALSE	High	Sequest HT (A4)	Unambiguous	[R].KQLATkAAR.[K]	K6(Acetyla)	1	H3	H3	2	2	0	1	1028.6	1028.62	-0.00871	9620976	4.35524	-55	100	9.8183	3317	Yang-N-1-20230914.raw	1
		FALSE	High	Sequest HT (A4)	Unambiguous	[R].KQLATkAAR.[K]	K6(Acetyla)	1	H3	H3	2	2	0	1	1028.61	1028.62	-0.007	829533	12.0627	-55	100	9.8536	2306	Yang-E-2-20230914.raw	1
		FALSE	High	Sequest HT (A4)	Unambiguous	[R].KQLATkAAR.[K]	K6(Acetyla)	1	H3	H3	2	2	0	1	1028.61	1028.62	-0.00804	1.32992e+06	7.93752	-55	100	9.791	2188	Yang-E-1-20230914.raw	1
		FALSE	High	Sequest HT (A4)	Unambiguous	[R].KQLATkAAR.[K]	K6(Acetyla)	1	H3	H3	2	2	0	1	1028.61	1028.62	-0.00572	2.64184e+06	10.439	-55	100	10.0646	2976	Yang-C-3-20230914.raw	1
		FALSE	High	Sequest HT (A4)	Unambiguous	[R].KQLATkAAR.[K]	K6(Acetyla)	1	H3	H3	2	2	0	1	1028.62	1028.62	-0.00157	1.3314e+06	15.3229	-55	100	9.742	2200	Yang-E-3-20230914.raw	1
	FALSE	High	[R].KLPFQRLVR.[E]		1	1	4	H3	H3 [65-73]		2	1156.73	0.664	12.39	82	123.5	24.26	4.99	151661	191790	211556	1.32915e+06	1.13346e+06	1064673	543801	814745	889072	1.32915e+06	1.21466e+06	1.22728e+06		Peak Found	Peak Found	Peak Found	Peak Found	Peak Found	High	High	2.1	18.49
		Checked	Confidence	Identifying Node	PSM Ambiguity	Annotated Sequence	Modifications	# Proteins	Master Protein Accessions	Protein Accessions	# Missed Cleavages	Charge	DeltaCn	Search Engine Rank	MH+ [Da]	Theo. MH+ [Da]	Deltam/z [Da]	Intensity	Isolation Interference [%]	Comp. Voltage [V]	Ion Inject Time [ms]	RT [min]	First Scan	Spectrum File	# Protein Groups	Precursor Abundance	Apex RT [min]
		FALSE	High	Sequest HT (A4)	Unambiguous	[R].KLPFQRLVR.[E]		1	H3	H3	2	3	0	1	1156.71	1156.73	-0.00687	1.00299e+06	4.53431	-55	100	18.6114	7670	Yang-N-1-20230914.raw	1	1064673	18.46
		FALSE	High	Sequest HT (A4)	Unambiguous	[R].KLPFQRLVR.[E]		1	H3	H3	2	3	0	1	1156.71	1156.73	-0.0069	48735.2	38.9001	-55	100	18.2658	7497	Yang-N-1-20230914.raw	1	1064673	18.46
		FALSE	High	Sequest HT (A4)	Unambiguous	[R].KLPFQRLVR.[E]		1	H3	H3	2	3	0	1	1156.72	1156.73	-0.00479	248485	4.99474	-55	100	18.298	6876	Yang-C-3-20230914.raw	1	269444	18.11
		FALSE	High	Sequest HT (A4)	Unambiguous	[R].KLPFQRLVR.[E]		1	H3	H3	2	3	0	1	1156.72	1156.73	-0.00461	128182	24.9182	-55	100	17.7673	6628	Yang-C-3-20230914.raw	1	269444	18.11
	FALSE	High	[R].KLPFQR.[L]		1	1	118	H3	H3 [65-70]		1	788.478	0.96	1.25	97.8	101.9	3.62	0.5	5.34496e+08	4.22632e+08	4.30175e+08	1.88249e+09	1.77151e+09	1.6324e+09	1.9165e+09	1.79538e+09	1.80782e+09	1.88249e+09	1.89842e+09	1.88172e+09		Peak Found	High	High	High	High	High	High	2.1	14.36
		Checked	Confidence	Identifying Node	PSM Ambiguity	Annotated Sequence	Modifications	# Proteins	Master Protein Accessions	Protein Accessions	# Missed Cleavages	Charge	DeltaCn	Search Engine Rank	MH+ [Da]	Theo. MH+ [Da]	Deltam/z [Da]	Intensity	Isolation Interference [%]	Comp. Voltage [V]	Ion Inject Time [ms]	RT [min]	First Scan	Spectrum File	# Protein Groups	Precursor Abundance	Apex RT [min]
		FALSE	High	Sequest HT (A4)	Unambiguous	[R].KLPFQR.[L]		1	H3	H3	1	2	0	1	788.465	788.478	-0.00645	761719	19.3669	-55	100	15.4771	5523	Yang-C-3-20230914.raw	1	542772	15.8
		FALSE	High	Sequest HT (A4)	Unambiguous	[R].KLPFQR.[L]		1	H3	H3	1	2	0	1	788.464	788.478	-0.00673	605851584	0.485031	-55	0.279	14.4833	5024	Yang-C-3-20230914.raw	1	1001407808	14.47
		FALSE	High	Sequest HT (A4)	Unambiguous	[R].KLPFQR.[L]		1	H3	H3	1	2	0	1	788.466	788.478	-0.00593	389106304	5.33061	-55	0.103	14.4895	5028	Yang-C-3-20230914.raw	1
		FALSE	High	Sequest HT (A4)	Unambiguous	[R].KLPFQR.[L]		1	H3	H3	1	2	0	1	788.466	788.478	-0.00593	389106304	5.41348	-55	0.263	14.4291	4990	Yang-C-3-20230914.raw	1
		FALSE	High	Sequest HT (A4)	Unambiguous	[R].KLPFQR.[L]		1	H3	H3	1	2	0	1	788.465	788.478	-0.00618	6.63535e+06	0.930726	-55	35.81	14.756	5166	Yang-C-3-20230914.raw	1	1001407808	14.47
		FALSE	High	Sequest HT (A4)	Unambiguous	[R].KLPFQR.[L]		1	H3	H3	1	2	0	1	788.464	788.478	-0.00673	605851584	0.655886	-55	0.111	14.4673	5013	Yang-C-3-20230914.raw	1	1001407808	14.47
		FALSE	High	Sequest HT (A4)	Unambiguous	[R].KLPFQR.[L]		1	H3	H3	1	2	0	1	788.463	788.478	-0.00712	1502654976	0.368337	-55	0.128	14.5036	5035	Yang-C-3-20230914.raw	1	1001407808	14.47
		FALSE	High	Sequest HT (A4)	Unambiguous	[R].KLPFQR.[L]		1	H3	H3	1	2	0	1	788.462	788.478	-0.00773	761396480	0.571158	-55	0.747	14.5583	5065	Yang-C-3-20230914.raw	1	1001407808	14.47
		FALSE	High	Sequest HT (A4)	Unambiguous	[R].KLPFQR.[L]		1	H3	H3	1	2	0	1	788.467	788.478	-0.00544	101698	40.0847	-55	100	18.9352	7182	Yang-C-3-20230914.raw	1	231133	18.55
		FALSE	High	Sequest HT (A4)	Unambiguous	[R].KLPFQR.[L]		1	H3	H3	1	2	0	1	788.465	788.478	-0.00618	6.63535e+06	12.032	-55	89.368	14.7654	5171	Yang-C-3-20230914.raw	1	1001407808	14.47
		FALSE	High	Sequest HT (A4)	Unambiguous	[R].KLPFQR.[L]		1	H3	H3	1	2	0	1	788.466	788.478	-0.00584	49854.2	51.1351	-55	100	19.5997	7514	Yang-C-3-20230914.raw	1	116668	19.87
		FALSE	High	Sequest HT (A4)	Unambiguous	[R].KLPFQR.[L]		1	H3	H3	1	2	0	1	788.462	788.478	-0.00764	273460384	0.676431	-55	2.02	14.5888	5081	Yang-C-3-20230914.raw	1	1001407808	14.47
		FALSE	High	Sequest HT (A4)	Unambiguous	[R].KLPFQR.[L]		1	H3	H3	1	2	0	1	788.465	788.478	-0.0063	1.80439e+06	9.86061	-55	100	14.5839	4046	Yang-E-2-20230914.raw	1
		FALSE	High	Sequest HT (A4)	Unambiguous	[R].KLPFQR.[L]		1	H3	H3	1	2	0	1	788.47	788.478	-0.0041	222263	22.8632	-55	100	16.3501	5942	Yang-C-3-20230914.raw	1	196952	16.75
		FALSE	High	Sequest HT (A4)	Unambiguous	[R].KLPFQR.[L]		1	H3	H3	1	2	0	1	788.463	788.478	-0.00712	1502654976	0.250819	-55	0.12	14.5117	5040	Yang-C-3-20230914.raw	1	1001407808	14.47
		FALSE	High	Sequest HT (A4)	Unambiguous	[R].KLPFQR.[L]		1	H3	H3	1	2	0	1	788.468	788.478	-0.00505	333707	24.3339	-55	100	16.0822	5817	Yang-C-3-20230914.raw	1	542772	15.8
		FALSE	High	Sequest HT (A4)	Unambiguous	[R].KLPFQR.[L]		1	H3	H3	1	2	0	1	788.462	788.478	-0.00764	5.81267e+06	12.8501	-55	98.097	14.6144	5646	Yang-N-1-20230914.raw	1
		FALSE	High	Sequest HT (A4)	Unambiguous	[R].KLPFQR.[L]		1	H3	H3	1	2	0	1	788.464	788.478	-0.00676	2904172	0.913722	-55	100	14.5394	4025	Yang-E-2-20230914.raw	1
		FALSE	High	Sequest HT (A4)	Unambiguous	[R].KLPFQR.[L]		1	H3	H3	1	2	0	1	788.466	788.478	-0.00575	205819	33.796	-55	100	17.4403	6458	Yang-C-3-20230914.raw	1	292145	17.48
		FALSE	High	Sequest HT (A4)	Unambiguous	[R].KLPFQR.[L]		1	H3	H3	1	2	0	1	788.463	788.478	-0.00721	1124573952	0.332704	-55	0.273	14.5256	5047	Yang-C-3-20230914.raw	1	1001407808	14.47
		FALSE	High	Sequest HT (A4)	Unambiguous	[R].KLPFQR.[L]		1	H3	H3	1	2	0	1	788.468	788.478	-0.00496	124259	14.5258	-55	100	17.9758	6726	Yang-C-3-20230914.raw	1	130765	18.07
		FALSE	High	Sequest HT (A4)	Unambiguous	[R].KLPFQR.[L]		1	H3	H3	1	2	0	1	788.465	788.478	-0.00621	555726	23.9289	-55	100	15.81	5685	Yang-C-3-20230914.raw	1	542772	15.8
		FALSE	High	Sequest HT (A4)	Unambiguous	[R].KLPFQR.[L]		1	H3	H3	1	2	0	1	788.468	788.478	-0.00493	52596.5	49.6933	-55	100	21.2279	8339	Yang-C-3-20230914.raw	1	44856.6	21.42
		FALSE	High	Sequest HT (A4)	Unambiguous	[R].KLPFQR.[L]		1	H3	H3	1	2	0	1	788.467	788.478	-0.00544	157513	30.3156	-55	100	13.5042	4531	Yang-C-3-20230914.raw	1	256842	13.42
		FALSE	High	Sequest HT (A4)	Unambiguous	[R].KLPFQR.[L]		1	H3	H3	1	2	0	1	788.468	788.478	-0.00462	2.65505e+06	17.2804	-55	43.809	14.894	5236	Yang-C-3-20230914.raw	1
		FALSE	High	Sequest HT (A4)	Unambiguous	[R].KLPFQR.[L]		1	H3	H3	1	2	0	1	788.467	788.478	-0.00541	165457	25.246	-55	100	18.5119	6975	Yang-C-3-20230914.raw	1	231133	18.55
		FALSE	High	Sequest HT (A4)	Unambiguous	[R].KLPFQR.[L]		1	H3	H3	1	2	0	1	788.466	788.478	-0.00575	4706537	14.0266	-55	100	14.8527	5216	Yang-C-3-20230914.raw	1
		FALSE	High	Sequest HT (A4)	Unambiguous	[R].KLPFQR.[L]		1	H3	H3	1	2	0	1	788.464	788.478	-0.00676	237485	44.6859	-55	100	19.4553	7441	Yang-C-3-20230914.raw	1	173710	19.4
		FALSE	High	Sequest HT (A4)	Unambiguous	[R].KLPFQR.[L]		1	H3	H3	1	2	0	1	788.464	788.478	-0.00697	233312	59.1504	-55	100	15.0275	4197	Yang-E-1-20230914.raw	1
		FALSE	High	Sequest HT (A4)	Unambiguous	[R].KLPFQR.[L]		1	H3	H3	1	2	0	1	788.466	788.478	-0.00596	625122	44.4295	-55	100	15.8465	5704	Yang-C-3-20230914.raw	1	542772	15.8
		FALSE	High	Sequest HT (A4)	Unambiguous	[R].KLPFQR.[L]		1	H3	H3	1	2	0	1	788.466	788.478	-0.00606	1.28375e+06	10.0979	-55	100	15.2781	5426	Yang-C-3-20230914.raw	1	1001407808	14.47
		FALSE	High	Sequest HT (A4)	Unambiguous	[R].KLPFQR.[L]		1	H3	H3	1	2	0	1	788.463	788.478	-0.00755	69195.4	67.6216	-55	100	13.5654	4966	Yang-N-2-20230914.raw	1	264493	13.59
		FALSE	High	Sequest HT (A4)	Unambiguous	[R].KLPFQR.[L]		1	H3	H3	1	2	0	1	788.468	788.478	-0.00493	73516.4	61.7361	-55	100	19.6922	7559	Yang-C-3-20230914.raw	1	116668	19.87
		FALSE	High	Sequest HT (A4)	Unambiguous	[R].KLPFQR.[L]		1	H3	H3	1	2	0	1	788.465	788.478	-0.00627	710794	11.7825	-55	100	15.9691	6339	Yang-N-1-20230914.raw	1	909276	15.63
		FALSE	High	Sequest HT (A4)	Unambiguous	[R].KLPFQR.[L]		1	H3	H3	1	2	0	1	788.463	788.478	-0.00728	58811.3	40.5095	-55	100	20.8848	8676	Yang-N-2-20230914.raw	1	91549.1	20.46
		FALSE	High	Sequest HT (A4)	Unambiguous	[R].KLPFQR.[L]		1	H3	H3	1	2	0	1	788.464	788.478	-0.00691	256266	20.7117	-55	100	16.5359	6625	Yang-N-1-20230914.raw	1	332691	16.71
		FALSE	High	Sequest HT (A4)	Unambiguous	[R].KLPFQR.[L]		1	H3	H3	1	2	0	1	788.464	788.478	-0.00679	294253	18.0599	-55	100	16.2565	6378	Yang-N-2-20230914.raw	1	670103	15.93
		FALSE	High	Sequest HT (A4)	Unambiguous	[R].KLPFQR.[L]		1	H3	H3	1	2	0	1	788.465	788.478	-0.00621	122586	23.9669	-55	100	19.046	7235	Yang-C-3-20230914.raw	1	231133	18.55
		FALSE	High	Sequest HT (A4)	Unambiguous	[R].KLPFQR.[L]		1	H3	H3	1	2	0	1	788.462	788.478	-0.00767	199438	7.97853	-55	100	18.2417	7377	Yang-N-2-20230914.raw	1	197134	18.18
		FALSE	High	Sequest HT (A4)	Unambiguous	[R].KLPFQR.[L]		1	H3	H3	1	2	0	1	788.464	788.478	-0.007	55897.9	22.7474	-55	100	21.2992	8970	Yang-N-3-20230914.raw	1	38629.5	21.39
		FALSE	High	Sequest HT (A4)	Unambiguous	[R].KLPFQR.[L]		1	H3	H3	1	2	0	1	788.464	788.478	-0.00682	54826.7	32.5883	-55	100	21.6893	9185	Yang-N-1-20230914.raw	1
		FALSE	High	Sequest HT (A4)	Unambiguous	[R].KLPFQR.[L]		1	H3	H3	1	2	0	1	788.465	788.478	-0.00648	56811.1	31.6099	-55	100	20.0996	8418	Yang-N-1-20230914.raw	1	82885.4	20.3
		FALSE	High	Sequest HT (A4)	Unambiguous	[R].KLPFQR.[L]		1	H3	H3	1	2	0	1	788.463	788.478	-0.00718	1.38358e+06	12.1136	-55	100	14.5926	3983	Yang-E-1-20230914.raw	1
		FALSE	High	Sequest HT (A4)	Unambiguous	[R].KLPFQR.[L]		1	H3	H3	1	2	0	1	788.463	788.478	-0.00725	62774.4	35.2333	-55	100	21.9751	9194	Yang-N-2-20230914.raw	1	61725	22.21
		FALSE	High	Sequest HT (A4)	Unambiguous	[R].KLPFQR.[L]		1	H3	H3	1	2	0	1	788.464	788.478	-0.00703	8788394	6.01999	-55	55.789	14.5927	5629	Yang-N-3-20230914.raw	1
		FALSE	High	Sequest HT (A4)	Unambiguous	[R].KLPFQR.[L]		1	H3	H3	1	2	0	1	788.462	788.478	-0.00767	8328593	21.2487	-55	100	14.561	5497	Yang-N-2-20230914.raw	1
		FALSE	High	Sequest HT (A4)	Unambiguous	[R].KLPFQR.[L]		1	H3	H3	1	2	0	1	788.463	788.478	-0.00758	18301734	0.422081	-55	15.732	14.5143	5595	Yang-N-1-20230914.raw	1
		FALSE	High	Sequest HT (A4)	Unambiguous	[R].KLPFQR.[L]		1	H3	H3	1	2	0	1	788.464	788.478	-0.00676	157659	13.3563	-55	100	15.6424	4543	Yang-E-2-20230914.raw	1	138516	15.67
		FALSE	High	Sequest HT (A4)	Unambiguous	[R].KLPFQR.[L]		1	H3	H3	1	2	0	1	788.463	788.478	-0.00749	783982	22.5811	-55	100	14.7928	4144	Yang-E-2-20230914.raw	1
		FALSE	High	Sequest HT (A4)	Unambiguous	[R].KLPFQR.[L]		1	H3	H3	1	2	0	1	788.464	788.478	-0.00688	7.66682e+06	24.4412	-55	100	14.601	5640	Yang-N-1-20230914.raw	1
		FALSE	High	Sequest HT (A4)	Unambiguous	[R].KLPFQR.[L]		1	H3	H3	1	2	0	1	788.462	788.478	-0.00783	44791.8	45.034	-55	100	22.8693	9741	Yang-N-3-20230914.raw	1	24028	23.16
		FALSE	High	Sequest HT (A4)	Unambiguous	[R].KLPFQR.[L]		1	H3	H3	1	2	0	1	788.462	788.478	-0.0077	222171	12.7348	-55	100	18.0539	7390	Yang-N-1-20230914.raw	1
		FALSE	High	Sequest HT (A4)	Unambiguous	[R].KLPFQR.[L]		1	H3	H3	1	2	0	1	788.463	788.478	-0.00725	60985.2	30.8454	-55	100	21.154	8929	Yang-N-1-20230914.raw	1	89750.4	20.69
		FALSE	High	Sequest HT (A4)	Unambiguous	[R].KLPFQR.[L]		1	H3	H3	1	2	0	1	788.465	788.478	-0.00648	727153	5.53773	-55	100	15.525	6112	Yang-N-1-20230914.raw	1	909276	15.63
		FALSE	High	Sequest HT (A4)	Unambiguous	[R].KLPFQR.[L]		1	H3	H3	1	2	0	1	788.463	788.478	-0.00758	260033	35.7432	-55	100	17.7349	7121	Yang-N-2-20230914.raw	1	274509	17.84
		FALSE	High	Sequest HT (A4)	Unambiguous	[R].KLPFQR.[L]		1	H3	H3	1	2	0	1	788.462	788.478	-0.00764	139488	21.8883	-55	100	19.2673	7883	Yang-N-2-20230914.raw	1
		FALSE	High	Sequest HT (A4)	Unambiguous	[R].KLPFQR.[L]		1	H3	H3	1	2	0	1	788.462	788.478	-0.00773	1.37256e+06	14.6356	-55	100	15.2974	5997	Yang-N-1-20230914.raw	1	909276	15.63
		FALSE	High	Sequest HT (A4)	Unambiguous	[R].KLPFQR.[L]		1	H3	H3	1	2	0	1	788.462	788.478	-0.00767	63331.1	65.3508	-55	100	19.7808	7728	Yang-C-1-20230914.raw	1
		FALSE	High	Sequest HT (A4)	Unambiguous	[R].KLPFQR.[L]		1	H3	H3	1	2	0	1	788.464	788.478	-0.007	709818	11.4063	-55	100	16.0616	6361	Yang-N-3-20230914.raw	1	677703	16.07
		FALSE	High	Sequest HT (A4)	Unambiguous	[R].KLPFQR.[L]		1	H3	H3	1	2	0	1	788.468	788.478	-0.00477	41359.2	22.1202	-55	100	21.7805	8618	Yang-C-3-20230914.raw	1	35663	21.82
		FALSE	High	Sequest HT (A4)	Unambiguous	[R].KLPFQR.[L]		1	H3	H3	1	2	0	1	788.463	788.478	-0.00718	666764	14.5219	-55	100	15.9337	6212	Yang-N-2-20230914.raw	1	670103	15.93
		FALSE	High	Sequest HT (A4)	Unambiguous	[R].KLPFQR.[L]		1	H3	H3	1	2	0	1	788.463	788.478	-0.00728	314845	47.313	-55	100	15.1003	4287	Yang-E-2-20230914.raw	1
		FALSE	High	Sequest HT (A4)	Unambiguous	[R].KLPFQR.[L]		1	H3	H3	1	2	0	1	788.464	788.478	-0.00703	136017	50.3464	-55	100	16.173	4789	Yang-E-2-20230914.raw	1	128991	16.07
		FALSE	High	Sequest HT (A4)	Unambiguous	[R].KLPFQR.[L]		1	H3	H3	1	2	0	1	788.468	788.478	-0.00471	21070.2	85.9529	-55	100	12.6913	4152	Yang-C-3-20230914.raw	1	37052.4	12.71
		FALSE	High	Sequest HT (A4)	Unambiguous	[R].KLPFQR.[L]		1	H3	H3	1	2	0	1	788.464	788.478	-0.00709	410304	17.1942	-55	100	16.5787	6616	Yang-N-3-20230914.raw	1	677703	16.07
		FALSE	High	Sequest HT (A4)	Unambiguous	[R].KLPFQR.[L]		1	H3	H3	1	2	0	1	788.464	788.478	-0.00709	2.45716e+06	1.11148	-55	100	14.5141	3944	Yang-E-1-20230914.raw	1
		FALSE	High	Sequest HT (A4)	Unambiguous	[R].KLPFQR.[L]		1	H3	H3	1	2	0	1	788.464	788.478	-0.00703	69699	14.0503	-55	100	16.7045	5010	Yang-E-2-20230914.raw	1	43336	16.72
		FALSE	High	Sequest HT (A4)	Unambiguous	[R].KLPFQR.[L]		1	H3	H3	1	2	0	1	788.463	788.478	-0.00725	147761	24.6981	-55	100	18.56	7643	Yang-N-1-20230914.raw	1	232662	18.67
		FALSE	High	Sequest HT (A4)	Unambiguous	[R].KLPFQR.[L]		1	H3	H3	1	2	0	1	788.466	788.478	-0.00572	25576.6	87.157	-55	100	22.6214	9038	Yang-C-3-20230914.raw	1	36263	22.48
		FALSE	High	Sequest HT (A4)	Unambiguous	[R].KLPFQR.[L]		1	H3	H3	1	2	0	1	788.464	788.478	-0.00667	43397.6	24.5935	-55	100	32.1153	14217	Yang-N-1-20230914.raw	1	20777.9	32.25
		FALSE	High	Sequest HT (A4)	Unambiguous	[R].KLPFQR.[L]		1	H3	H3	1	2	0	1	788.464	788.478	-0.00667	1365195	10.0511	-55	85.523	15.3038	5983	Yang-N-3-20230914.raw	1	1.49808e+06	15.35
		FALSE	High	Sequest HT (A4)	Unambiguous	[R].KLPFQR.[L]		1	H3	H3	1	2	0	1	788.463	788.478	-0.00761	140102	38.3385	-55	100	18.3608	7544	Yang-N-1-20230914.raw	1	232662	18.67
		FALSE	High	Sequest HT (A4)	Unambiguous	[R].KLPFQR.[L]		1	H3	H3	1	2	0	1	788.462	788.478	-0.00767	620491	9.2332	-55	100	15.5445	6103	Yang-N-3-20230914.raw	1	782901	15.69
		FALSE	High	Sequest HT (A4)	Unambiguous	[R].KLPFQR.[L]		1	H3	H3	1	2	0	1	788.463	788.478	-0.00734	303458	10.2301	-55	100	16.3967	6093	Yang-C-2-20230914.raw	1	245272	16.77
		FALSE	High	Sequest HT (A4)	Unambiguous	[R].KLPFQR.[L]		1	H3	H3	1	2	0	1	788.463	788.478	-0.00725	4443161	1.56484	-55	32.825	14.7843	5275	Yang-C-1-20230914.raw	1
		FALSE	High	Sequest HT (A4)	Unambiguous	[R].KLPFQR.[L]		1	H3	H3	1	2	0	1	788.463	788.478	-0.00752	748396	27.759	-55	100	15.7624	6123	Yang-N-2-20230914.raw	1	793994	15.61
		FALSE	High	Sequest HT (A4)	Unambiguous	[R].KLPFQR.[L]		1	H3	H3	1	2	0	1	788.463	788.478	-0.00755	124180	62.6958	-55	100	13.5043	5067	Yang-N-1-20230914.raw	1	244972	13.52
		FALSE	High	Sequest HT (A4)	Unambiguous	[R].KLPFQR.[L]		1	H3	H3	1	2	0	1	788.464	788.478	-0.007	325411	6.29559	-55	100	17.0329	6874	Yang-N-1-20230914.raw	1	332691	16.71
		FALSE	High	Sequest HT (A4)	Unambiguous	[R].KLPFQR.[L]		1	H3	H3	1	2	0	1	788.467	788.478	-0.00544	55007.6	30.443	-55	100	24.6798	10057	Yang-C-3-20230914.raw	1	48025.3	24.16
		FALSE	High	Sequest HT (A4)	Unambiguous	[R].KLPFQR.[L]		1	H3	H3	1	2	0	1	788.466	788.478	-0.00587	58739.8	37.9911	-55	100	22.3188	8887	Yang-C-3-20230914.raw	1	39643.6	22.22
		FALSE	High	Sequest HT (A4)	Unambiguous	[R].KLPFQR.[L]		1	H3	H3	1	2	0	1	788.463	788.478	-0.00721	327726	34.9158	-55	100	16.9061	6812	Yang-N-1-20230914.raw	1	332691	16.71
		FALSE	High	Sequest HT (A4)	Unambiguous	[R].KLPFQR.[L]		1	H3	H3	1	2	0	1	788.464	788.478	-0.00682	2.10081e+06	81.0725	-55	48.033	15.0282	5846	Yang-N-3-20230914.raw	1	1.68245e+06	15.12
		FALSE	High	Sequest HT (A4)	Unambiguous	[R].KLPFQR.[L]		1	H3	H3	1	2	0	1	788.464	788.478	-0.00664	3.24211e+06	7.90206	-55	31.447	14.7826	5732	Yang-N-1-20230914.raw	1
		FALSE	High	Sequest HT (A4)	Unambiguous	[R].KLPFQR.[L]		1	H3	H3	1	2	0	1	788.464	788.478	-0.00673	740684	31.4355	-55	98.402	16.0293	6369	Yang-N-1-20230914.raw	1	909276	15.63
		FALSE	High	Sequest HT (A4)	Unambiguous	[R].KLPFQR.[L]		1	H3	H3	1	2	0	1	788.464	788.478	-0.00691	3.83644e+06	3.21764	-55	46.898	14.755	5597	Yang-N-2-20230914.raw	1
		FALSE	High	Sequest HT (A4)	Unambiguous	[R].KLPFQR.[L]		1	H3	H3	1	2	0	1	788.462	788.478	-0.00764	171927	33.5123	-55	100	9.8713	3288	Yang-N-2-20230914.raw	1
		FALSE	High	Sequest HT (A4)	Unambiguous	[R].KLPFQR.[L]		1	H3	H3	1	2	0	1	788.462	788.478	-0.00764	25365.3	60.8086	-55	100	13.4441	4622	Yang-C-2-20230914.raw	1	241581	13.52
		FALSE	High	Sequest HT (A4)	Unambiguous	[R].KLPFQR.[L]		1	H3	H3	1	2	0	1	788.463	788.478	-0.00752	70031.6	41.3948	-55	100	23.4059	10009	Yang-N-1-20230914.raw	1	39667.8	23.36
		FALSE	High	Sequest HT (A4)	Unambiguous	[R].KLPFQR.[L]		1	H3	H3	1	2	0	1	788.462	788.478	-0.00779	62946.3	68.9766	-55	100	13.4279	5032	Yang-N-3-20230914.raw	1	303586	13.45
		FALSE	High	Sequest HT (A4)	Unambiguous	[R].KLPFQR.[L]		1	H3	H3	1	2	0	1	788.463	788.478	-0.00755	53827.4	38.9627	-55	100	22.8595	9745	Yang-N-1-20230914.raw	1	60219.5	22.46
		FALSE	High	Sequest HT (A4)	Unambiguous	[R].KLPFQR.[L]		1	H3	H3	1	2	0	1	788.465	788.478	-0.00651	265191	49.6833	-55	100	13.5942	4980	Yang-N-2-20230914.raw	1	264493	13.59
		FALSE	High	Sequest HT (A4)	Unambiguous	[R].KLPFQR.[L]		1	H3	H3	1	2	0	1	788.465	788.478	-0.00657	3.16201e+06	16.172	-55	33.681	14.7738	5606	Yang-N-2-20230914.raw	1
		FALSE	High	Sequest HT (A4)	Unambiguous	[R].KLPFQR.[L]		1	H3	H3	1	2	0	1	788.462	788.478	-0.00786	99548.6	25.8665	-55	100	20.3341	8411	Yang-N-2-20230914.raw	1	91549.1	20.46
		FALSE	High	Sequest HT (A4)	Unambiguous	[R].KLPFQR.[L]		1	H3	H3	1	2	0	1	788.468	788.478	-0.00511	46942.3	84.2288	-55	100	20.6918	8065	Yang-C-3-20230914.raw	1	56751.7	20.8
		FALSE	High	Sequest HT (A4)	Unambiguous	[R].KLPFQR.[L]		1	H3	H3	1	2	0	1	788.462	788.478	-0.00764	188580	35.4299	-55	100	18.321	7484	Yang-N-3-20230914.raw	1	67068.8	18.03
		FALSE	High	Sequest HT (A4)	Unambiguous	[R].KLPFQR.[L]		1	H3	H3	1	2	0	1	788.463	788.478	-0.00731	126455	24.9597	-55	100	19.071	7900	Yang-N-1-20230914.raw	1	232662	18.67
		FALSE	High	Sequest HT (A4)	Unambiguous	[R].KLPFQR.[L]		1	H3	H3	1	2	0	1	788.463	788.478	-0.00743	29801.7	75.0639	-55	100	17.7677	5480	Yang-E-2-20230914.raw	1	20074.8	17.87
		FALSE	High	Sequest HT (A4)	Unambiguous	[R].KLPFQR.[L]		1	H3	H3	1	2	0	1	788.464	788.478	-0.00664	749047	15.2799	-55	100	16.0065	6358	Yang-N-1-20230914.raw	1	909276	15.63
		FALSE	High	Sequest HT (A4)	Unambiguous	[R].KLPFQR.[L]		1	H3	H3	1	2	0	1	788.466	788.478	-0.00602	2.10714e+06	83.6372	-55	54.377	15.018	5852	Yang-N-1-20230914.raw	1
		FALSE	High	Sequest HT (A4)	Unambiguous	[R].KLPFQR.[L]		1	H3	H3	1	2	0	1	788.463	788.478	-0.00734	3.60114e+06	20.2064	-55	28.578	14.7874	5727	Yang-N-3-20230914.raw	1	1.68245e+06	15.12
		FALSE	High	Sequest HT (A4)	Unambiguous	[R].KLPFQR.[L]		1	H3	H3	1	2	0	1	788.469	788.478	-0.00419	43057	42.5924	-55	100	20.148	7790	Yang-C-3-20230914.raw	1
		FALSE	High	Sequest HT (A4)	Unambiguous	[R].KLPFQR.[L]		1	H3	H3	1	2	0	1	788.464	788.478	-0.00691	109096	0	-55	100	27.4165	11424	Yang-C-3-20230914.raw	1	58554	27.37
		FALSE	High	Sequest HT (A4)	Unambiguous	[R].KLPFQR.[L]		1	H3	H3	1	2	0	1	788.462	788.478	-0.00767	55747	33.5612	-55	100	21.8221	9227	Yang-N-3-20230914.raw	1	25330.1	22.04
		FALSE	High	Sequest HT (A4)	Unambiguous	[R].KLPFQR.[L]		1	H3	H3	1	2	0	1	788.464	788.478	-0.00709	35140.9	45.7037	-55	100	24.5053	10545	Yang-N-1-20230914.raw	1	43133.6	24.91
		FALSE	High	Sequest HT (A4)	Unambiguous	[R].KLPFQR.[L]		1	H3	H3	1	2	0	1	788.463	788.478	-0.00728	119408	22.343	-55	100	15.5397	4452	Yang-E-1-20230914.raw	1	153522	15.63
		FALSE	High	Sequest HT (A4)	Unambiguous	[R].KLPFQR.[L]		1	H3	H3	1	2	0	1	788.463	788.478	-0.00731	710198	21.3155	-55	100	15.9981	6245	Yang-N-2-20230914.raw	1	670103	15.93
		FALSE	High	Sequest HT (A4)	Unambiguous	[R].KLPFQR.[L]		1	H3	H3	1	2	0	1	788.463	788.478	-0.00749	298103	6.77107	-55	100	17.2413	6865	Yang-N-2-20230914.raw	1	427240	17.38
		FALSE	High	Sequest HT (A4)	Unambiguous	[R].KLPFQR.[L]		1	H3	H3	1	2	0	1	788.462	788.478	-0.00776	235729	25.2124	-55	100	13.5346	4665	Yang-C-2-20230914.raw	1	241581	13.52
		FALSE	High	Sequest HT (A4)	Unambiguous	[R].KLPFQR.[L]		1	H3	H3	1	2	0	1	788.462	788.478	-0.00764	125041	58.1355	-55	100	16.0683	4705	Yang-E-1-20230914.raw	1	107109	16.02
		FALSE	High	Sequest HT (A4)	Unambiguous	[R].KLPFQR.[L]		1	H3	H3	1	2	0	1	788.462	788.478	-0.00776	25101.8	56.7325	-55	100	13.3829	4530	Yang-C-1-20230914.raw	1	216837	13.45
		FALSE	High	Sequest HT (A4)	Unambiguous	[R].KLPFQR.[L]		1	H3	H3	1	2	0	1	788.464	788.478	-0.00664	30487.9	46.1101	-55	100	28.4713	12486	Yang-N-1-20230914.raw	1	9979.32	28.49
		FALSE	High	Sequest HT (A4)	Unambiguous	[R].KLPFQR.[L]		1	H3	H3	1	2	0	1	788.468	788.478	-0.00499	29309.7	40.6824	-55	100	24.0995	9769	Yang-C-3-20230914.raw	1
		FALSE	High	Sequest HT (A4)	Unambiguous	[R].KLPFQR.[L]		1	H3	H3	1	2	0	1	788.463	788.478	-0.00737	64307.1	8.9214	-55	100	17.1027	5135	Yang-E-1-20230914.raw	1	37989.6	17.1
		FALSE	High	Sequest HT (A4)	Unambiguous	[R].KLPFQR.[L]		1	H3	H3	1	2	0	1	788.465	788.478	-0.00633	147032	36.3956	-55	100	10.0438	3438	Yang-N-1-20230914.raw	1	92856.4	9.99
		FALSE	High	Sequest HT (A4)	Unambiguous	[R].KLPFQR.[L]		1	H3	H3	1	2	0	1	788.462	788.478	-0.00783	358065	32.0907	-55	100	16.0903	5950	Yang-C-1-20230914.raw	1	441406	16.11
		FALSE	High	Sequest HT (A4)	Unambiguous	[R].KLPFQR.[L]		1	H3	H3	1	2	0	1	788.463	788.478	-0.00718	71982.3	52.2537	-55	100	20.6327	8678	Yang-N-1-20230914.raw	1	89750.4	20.69
		FALSE	High	Sequest HT (A4)	Unambiguous	[R].KLPFQR.[L]		1	H3	H3	1	2	0	1	788.467	788.478	-0.0052	15188.2	85.021	-55	100	12.5618	4087	Yang-C-3-20230914.raw	1	37052.4	12.71
		FALSE	High	Sequest HT (A4)	Unambiguous	[R].KLPFQR.[L]		1	H3	H3	1	2	0	1	788.463	788.478	-0.00731	252551	33.0549	-55	100	17.0963	6871	Yang-N-3-20230914.raw	1	114549	16.9
	FALSE	High	[K].STELLIRK.[L]		1	1	8	H3	H3 [58-65]		1	959.588	3.117	53.38	191.8	56.3	49.74	21.43	62756.8	146630	168636	213187		136262	225023	622898	708699	213187		157074		Peak Found	High	High	High	High	High	High	1.99	13.8
		Checked	Confidence	Identifying Node	PSM Ambiguity	Annotated Sequence	Modifications	# Proteins	Master Protein Accessions	Protein Accessions	# Missed Cleavages	Charge	DeltaCn	Search Engine Rank	MH+ [Da]	Theo. MH+ [Da]	Deltam/z [Da]	Intensity	Isolation Interference [%]	Comp. Voltage [V]	Ion Inject Time [ms]	RT [min]	First Scan	Spectrum File	# Protein Groups	Precursor Abundance	Apex RT [min]
		FALSE	High	Sequest HT (A4)	Unambiguous	[K].STELLIRK.[L]		1	H3	H3	1	2	0	1	959.576	959.588	-0.00643	38598	32.3988	-55	100	13.8339	4689	Yang-C-3-20230914.raw	1	104720	13.84
		FALSE	High	Sequest HT (A4)	Unambiguous	[K].STELLIRK.[L]		1	H3	H3	1	2	0	1	959.572	959.588	-0.00817	94771.9	3.08671	-55	100	13.7942	3671	Yang-E-2-20230914.raw	1
		FALSE	High	Sequest HT (A4)	Unambiguous	[K].STELLIRK.[L]		1	H3	H3	1	2	0	1	959.57	959.588	-0.00911	69485.4	11.2356	-55	100	13.8035	3586	Yang-E-1-20230914.raw	1	168636	13.79
		FALSE	High	Sequest HT (A4)	Unambiguous	[K].STELLIRK.[L]		1	H3	H3	1	2	0	1	959.571	959.588	-0.0086	121268	79.7739	-55	100	13.8184	5097	Yang-N-2-20230914.raw	1
		FALSE	High	Sequest HT (A4)	Unambiguous	[K].STELLIRK.[L]		1	H3	H3	1	2	0	1	959.572	959.588	-0.00835	180377	69.9454	-55	100	13.8277	5231	Yang-N-1-20230914.raw	1
		FALSE	High	Sequest HT (A4)	Unambiguous	[K].STELLIRK.[L]		1	H3	H3	1	2	0	1	959.571	959.588	-0.0086	121268	83.0088	-55	63.115	13.811	5093	Yang-N-2-20230914.raw	1
		FALSE	High	Sequest HT (A4)	Unambiguous	[K].STELLIRK.[L]		1	H3	H3	1	2	0	1	959.572	959.588	-0.00835	180377	70.0358	-55	100	13.8221	5228	Yang-N-1-20230914.raw	1
		FALSE	High	Sequest HT (A4)	Unambiguous	[K].STELLIRK.[L]		1	H3	H3	1	2	0	1	959.57	959.588	-0.00936	170916	44.0181	-55	100	13.7495	5189	Yang-N-3-20230914.raw	1
	FALSE	High	[R].VTIMPKDIQLAR.[R]	1xAcetylation [K6]	1	1	1	H3	H3 [118-129]	H3 1xAcetylation [K123]	1	1426.81																			Not Reliable	n/a	n/a	n/a	n/a	High	n/a	High	1.92
		Checked	Confidence	Identifying Node	PSM Ambiguity	Annotated Sequence	Modifications	# Proteins	Master Protein Accessions	Protein Accessions	# Missed Cleavages	Charge	DeltaCn	Search Engine Rank	MH+ [Da]	Theo. MH+ [Da]	Deltam/z [Da]	Intensity	Isolation Interference [%]	Comp. Voltage [V]	Ion Inject Time [ms]	RT [min]	First Scan	Spectrum File	# Protein Groups	Precursor Abundance	Apex RT [min]
		FALSE	High	Sequest HT (A4)	Unambiguous	[R].VTIMPkDIQLAR.[R]	K6(Acetyla)	1	H3	H3	1	3	0	1	1426.79	1426.81	-0.00566	26392.6	79.618	-55	100	24.1066	10236	Yang-N-2-20230914.raw	1
	FALSE	High	[R].VTIMPKDIQLAR.[R]	1xOxidation [M4]	1	1	11	H3	H3 [118-129]		1	1400.79	1.081	39.2	73.5	68	3.41	63.15	2.71395e+06	2.21945e+06	2.1628e+06	2.3743e+06	8.14006e+06	1.02871e+07	9.7312e+06	9.42845e+06	9.08925e+06	2.3743e+06	8.72323e+06	1.18583e+07		Peak Found	High	High	High	High	High	High	1.9	20.55
		Checked	Confidence	Identifying Node	PSM Ambiguity	Annotated Sequence	Modifications	# Proteins	Master Protein Accessions	Protein Accessions	# Missed Cleavages	Charge	DeltaCn	Search Engine Rank	MH+ [Da]	Theo. MH+ [Da]	Deltam/z [Da]	Intensity	Isolation Interference [%]	Comp. Voltage [V]	Ion Inject Time [ms]	RT [min]	First Scan	Spectrum File	# Protein Groups	Precursor Abundance	Apex RT [min]
		FALSE	High	Sequest HT (A4)	Unambiguous	[R].VTImPKDIQLAR.[R]	M4(Oxidation)	1	H3	H3	1	2	0	1	1400.78	1400.79	-0.00713	87629	0	-55	100	20.4491	7941	Yang-C-3-20230914.raw	1	2.98068e+06	20.53
		FALSE	High	Sequest HT (A4)	Unambiguous	[R].VTImPKDIQLAR.[R]	M4(Oxidation)	1	H3	H3	1	3	0	1	1400.77	1400.79	-0.00901	69665.6	46.1476	-55	100	20.9741	6838	Yang-E-1-20230914.raw	1	60724.8	20.96
		FALSE	High	Sequest HT (A4)	Unambiguous	[R].VTImPKDIQLAR.[R]	M4(Oxidation)	1	H3	H3	1	2	0	1	1400.77	1400.79	-0.01177	40255.4	9.70873	-55	100	20.4504	6592	Yang-E-1-20230914.raw	1	458095	20.51
		FALSE	High	Sequest HT (A4)	Unambiguous	[R].VTImPKDIQLAR.[R]	M4(Oxidation)	1	H3	H3	1	2	0	1	1400.77	1400.79	-0.01061	29019	0	-55	100	20.4324	6555	Yang-E-2-20230914.raw	1	496636	20.52
		FALSE	High	Sequest HT (A4)	Unambiguous	[R].VTImPKDIQLAR.[R]	M4(Oxidation)	1	H3	H3	1	3	0	1	1400.77	1400.79	-0.00617	32885.9	82.6077	-55	100	21.8141	8635	Yang-C-3-20230914.raw	1	40190.9	21.77
		FALSE	High	Sequest HT (A4)	Unambiguous	[R].VTImPKDIQLAR.[R]	M4(Oxidation)	1	H3	H3	1	2	0	1	1400.77	1400.79	-0.01049	89528.3	5.32507	-55	100	20.4504	8588	Yang-N-1-20230914.raw	1	2.902e+06	20.52
		FALSE	High	Sequest HT (A4)	Unambiguous	[R].VTImPKDIQLAR.[R]	M4(Oxidation)	1	H3	H3	1	3	0	1	1400.77	1400.79	-0.00895	9161228	36.2451	-55	100	20.5808	8653	Yang-N-1-20230914.raw	1	7.24847e+06	20.52
		FALSE	High	Sequest HT (A4)	Unambiguous	[R].VTImPKDIQLAR.[R]	M4(Oxidation)	1	H3	H3	1	3	0	1	1400.77	1400.79	-0.00822	75245.4	56.5994	-55	100	21.1973	8950	Yang-N-1-20230914.raw	1	136663	21.01
		FALSE	High	Sequest HT (A4)	Unambiguous	[R].VTImPKDIQLAR.[R]	M4(Oxidation)	1	H3	H3	1	3	0	1	1400.77	1400.79	-0.00697	27510.6	77.9056	-55	100	21.7658	9200	Yang-N-3-20230914.raw	1	34928.7	21.74
		FALSE	High	Sequest HT (A4)	Unambiguous	[R].VTImPKDIQLAR.[R]	M4(Oxidation)	1	H3	H3	1	2	0	1	1400.77	1400.79	-0.01073	93723	0	-55	100	20.4026	8444	Yang-N-2-20230914.raw	1	2189238	20.47
		FALSE	High	Sequest HT (A4)	Unambiguous	[R].VTImPKDIQLAR.[R]	M4(Oxidation)	1	H3	H3	1	3	0	1	1400.77	1400.79	-0.00633	59792.5	83.0454	-55	100	23.6722	9559	Yang-C-3-20230914.raw	1
	FALSE	High	[K].SAPTTGGVKKPHR.[Y]	1xAcetylation [K]	1	1	10	H3	H3 [29-41]	H3 1xAcetylation [K37]	1	1377.76	6.466	1121.85	133.4	20.6	18.06	140.48	76210.9	83155.7		2783.27		719662	273264	353254		2783.27		829579		High	High	High	High	High	High	High	1.9	9.9
		Checked	Confidence	Identifying Node	PSM Ambiguity	Annotated Sequence	Modifications	# Proteins	Master Protein Accessions	Protein Accessions	# Missed Cleavages	Charge	DeltaCn	Search Engine Rank	MH+ [Da]	Theo. MH+ [Da]	Deltam/z [Da]	Intensity	Isolation Interference [%]	Comp. Voltage [V]	Ion Inject Time [ms]	RT [min]	First Scan	Spectrum File	# Protein Groups	Precursor Abundance	Apex RT [min]
		FALSE	High	Sequest HT (A4)	Unambiguous	[K].SAPTTGGVkKPHR.[Y]	K9(Acetyla)	1	H3	H3	1	3	0	1	1377.77	1377.76	0.00267	320570	56.5342	-55	54.933	9.7017	3253	Yang-N-3-20230914.raw	1
		FALSE	High	Sequest HT (A4)	Unambiguous	[K].SAPTTGGVkKPHR.[Y]	K9(Acetyla)	1	H3	H3	1	3	0	1	1377.73	1377.76	-0.00853	162928	93.1053	-55	100	9.6779	3236	Yang-N-3-20230914.raw	1
		FALSE	High	Sequest HT (A4)	Unambiguous	[K].SAPTTGGVkKPHR.[Y]	K9(Acetyla)	1	H3	H3	1	3	0	1	1377.73	1377.76	-0.0088	1.94813e+06	1.42997	-55	86.058	9.8244	3321	Yang-N-1-20230914.raw	1	719662	9.78
		FALSE	High	Sequest HT (A4)	Unambiguous	[K].SAPTTGGVkKPHR.[Y]	K9(Acetyla)	1	H3	H3	1	3	0	1	1377.74	1377.76	-0.00786	184966	15.5368	-55	100	9.8037	2196	Yang-E-1-20230914.raw	1
		FALSE	High	Sequest HT (A4)	Unambiguous	[K].SAPTTGGVkKPHR.[Y]	K9(Acetyla)	1	H3	H3	1	3	0	1	1377.75	1377.76	-0.00386	143171	6.99211	-55	100	9.7506	2205	Yang-E-3-20230914.raw	1
		FALSE	High	Sequest HT (A4)	Unambiguous	[K].SAPTTGGVKkPHR.[Y]	K10(Acetyla)	1	H3	H3	1	3	0	1	1377.74	1377.76	-0.00542	1367935	1.77038	-55	100	10.0723	2980	Yang-C-3-20230914.raw	1
		FALSE	High	Sequest HT (A4)	Unambiguous	[K].SAPTTGGVkKPHR.[Y]	K9(Acetyla)	1	H3	H3	1	3	0	1	1377.73	1377.76	-0.00871	679659	3.68387	-55	100	9.6979	3200	Yang-N-2-20230914.raw	1
		FALSE	High	Sequest HT (A4)	Unambiguous	[K].SAPTTGGVkKPHR.[Y]	K9(Acetyla)	1	H3	H3	1	3	0	1	1377.78	1377.76	0.0053	92356.6	83.573	-55	100	9.6371	3220	Yang-N-1-20230914.raw	1
		FALSE	High	Sequest HT (A4)	Unambiguous	[K].SAPTTGGVkKPHR.[Y]	K9(Acetyla)	1	H3	H3	1	3	0	1	1377.77	1377.76	0.0031	38281.6	93.3194	-55	100	9.7182	2237	Yang-E-2-20230914.raw	1
		FALSE	High	Sequest HT (A4)	Unambiguous	[K].SAPTTGGVKkPHR.[Y]	K10(Acetyla)	1	H3	H3	1	3	0	1	1377.75	1377.76	-0.00288	373959	74.4047	-55	100	9.745	3279	Yang-N-3-20230914.raw	1
	FALSE	High	[R].VTIMPKDIQLAR.[R]	1xOxidation [M4]; 1xAcetylation [K6]	1	1	7	H3	H3 [118-129]	H3 1xAcetylation [K123]	1	1442.8	0.895	19.29	104.1	108.5	8.02	15.72	32686.8	27754.3	24260.1	152571	106265	105997	117203	117903	101954	152571	113878	122187		Peak Found	High	Peak Found	Peak Found	High	High	High	1.86	28.51
		Checked	Confidence	Identifying Node	PSM Ambiguity	Annotated Sequence	Modifications	# Proteins	Master Protein Accessions	Protein Accessions	# Missed Cleavages	Charge	DeltaCn	Search Engine Rank	MH+ [Da]	Theo. MH+ [Da]	Deltam/z [Da]	Intensity	Isolation Interference [%]	Comp. Voltage [V]	Ion Inject Time [ms]	RT [min]	First Scan	Spectrum File	# Protein Groups	Precursor Abundance	Apex RT [min]
		FALSE	High	Sequest HT (A4)	Unambiguous	[R].VTImPkDIQLAR.[R]	M4(Oxidation); K6(Acetyla)	1	H3	H3	1	3	0	1	1442.8	1442.8	-0.00179	30245.9	87.2209	-55	100	21.1732	8939	Yang-N-1-20230914.raw	1
		FALSE	High	Sequest HT (A4)	Unambiguous	[R].VTImPkDIQLAR.[R]	M4(Oxidation); K6(Acetyla)	1	H3	H3	1	3	0	1	1442.79	1442.8	-0.00338	56050	81.7135	-55	100	21.1593	8806	Yang-N-2-20230914.raw	1
		FALSE	High	Sequest HT (A4)	Unambiguous	[R].VTImPkDIQLAR.[R]	M4(Oxidation); K6(Acetyla)	1	H3	H3	1	3	0	1	1442.79	1442.8	-0.00383	40872.6	83.537	-55	100	21.1882	8437	Yang-C-1-20230914.raw	1
		FALSE	High	Sequest HT (A4)	Unambiguous	[R].VTImPkDIQLAR.[R]	M4(Oxidation); K6(Acetyla)	1	H3	H3	1	2	0	1	1442.79	1442.8	-0.00649	44067.1	8.1708	-55	100	28.4884	11957	Yang-C-3-20230914.raw	1	53858.2	28.51
		FALSE	High	Sequest HT (A4)	Unambiguous	[R].VTImPkDIQLAR.[R]	M4(Oxidation); K6(Acetyla)	1	H3	H3	1	2	0	1	1442.78	1442.8	-0.01016	31702.9	18.2407	-55	100	28.4695	12485	Yang-N-1-20230914.raw	1	105997	28.5
		FALSE	High	Sequest HT (A4)	Unambiguous	[R].VTImPkDIQLAR.[R]	M4(Oxidation); K6(Acetyla)	1	H3	H3	1	2	0	1	1442.78	1442.8	-0.01211	20097.9	63.9581	-55	100	28.4573	12407	Yang-N-2-20230914.raw	1	106265	28.5
		FALSE	High	Sequest HT (A4)	Unambiguous	[R].VTImPkDIQLAR.[R]	M4(Oxidation); K6(Acetyla)	1	H3	H3	1	2	0	1	1442.78	1442.8	-0.0115	22535.9	15.1272	-55	100	28.4673	10080	Yang-E-2-20230914.raw	1	27754.3	28.49
	FALSE	High	[R].KYQKSTELLIR.[K]		1	1	2	H3	H3 [54-64]		2	1378.81	0.777	21.7	68.4	88	9.87	22.23	867583	879284	768554	5309859	3.18757e+06	3.60421e+06	3.11083e+06	3.73529e+06	3.22988e+06	5309859	3.41594e+06	4.15469e+06		Peak Found	Peak Found	High	Peak Found	Peak Found	High	High	1.83	14.02
		Checked	Confidence	Identifying Node	PSM Ambiguity	Annotated Sequence	Modifications	# Proteins	Master Protein Accessions	Protein Accessions	# Missed Cleavages	Charge	DeltaCn	Search Engine Rank	MH+ [Da]	Theo. MH+ [Da]	Deltam/z [Da]	Intensity	Isolation Interference [%]	Comp. Voltage [V]	Ion Inject Time [ms]	RT [min]	First Scan	Spectrum File	# Protein Groups	Precursor Abundance	Apex RT [min]
		FALSE	High	Sequest HT (A4)	Unambiguous	[R].KYQKSTELLIR.[K]		1	H3	H3	2	3	0	1	1378.78	1378.81	-0.00783	347593	17.223	-55	100	13.9661	3665	Yang-E-1-20230914.raw	1	768554	13.98
		FALSE	High	Sequest HT (A4)	Unambiguous	[R].KYQKSTELLIR.[K]		1	H3	H3	2	3	0	1	1378.78	1378.81	-0.00832	231659	33.7395	-55	51.331	13.8818	5258	Yang-N-1-20230914.raw	1	3.60421e+06	13.91
	FALSE	High	[R].KLPFQR.[L]	1xAcetylation [K1]	1	1	5	H3	H3 [65-70]	H3 1xAcetylation [K65]	1	830.488	1.158	16.01	108.3	93.5	18.49	4.71	1.11439e+06	1.36722e+06	1.24736e+06	4.70625e+06	3.99725e+06	3.92839e+06	3.99579e+06	5.8081e+06	5.24206e+06	4.70625e+06	4.28362e+06	4.52838e+06		Peak Found	High	Peak Found	Peak Found	Peak Found	High	High	1.82	19.6
		Checked	Confidence	Identifying Node	PSM Ambiguity	Annotated Sequence	Modifications	# Proteins	Master Protein Accessions	Protein Accessions	# Missed Cleavages	Charge	DeltaCn	Search Engine Rank	MH+ [Da]	Theo. MH+ [Da]	Deltam/z [Da]	Intensity	Isolation Interference [%]	Comp. Voltage [V]	Ion Inject Time [ms]	RT [min]	First Scan	Spectrum File	# Protein Groups	Precursor Abundance	Apex RT [min]
		FALSE	High	Sequest HT (A4)	Unambiguous	[R].kLPFQR.[L]	K1(Acetyla)	1	H3	H3	1	2	0	1	830.479	830.488	-0.00475	2.23109e+06	5.51045	-55	48.417	19.6193	7523	Yang-C-3-20230914.raw	1	2.60106e+06	19.63
		FALSE	High	Sequest HT (A4)	Unambiguous	[R].kLPFQR.[L]	K1(Acetyla)	1	H3	H3	1	2	0	1	830.478	830.488	-0.00533	769018	7.60647	-55	78.286	19.5847	7506	Yang-C-3-20230914.raw	1	2.60106e+06	19.63
		FALSE	High	Sequest HT (A4)	Unambiguous	[R].kLPFQR.[L]	K1(Acetyla)	1	H3	H3	1	2	0	1	830.473	830.488	-0.0078	88241.2	12.7988	-55	100	19.52	6133	Yang-E-2-20230914.raw	1	1.36722e+06	19.6
		FALSE	High	Sequest HT (A4)	Unambiguous	[R].kLPFQR.[L]	K1(Acetyla)	1	H3	H3	1	2	0	1	830.475	830.488	-0.00688	1.55838e+06	2.48193	-55	100	19.615	6178	Yang-E-2-20230914.raw	1	1.36722e+06	19.6
		FALSE	High	Sequest HT (A4)	Unambiguous	[R].kLPFQR.[L]	K1(Acetyla)	1	H3	H3	1	2	0	1	830.474	830.488	-0.00728	5173819	0.779342	-55	28.433	19.6341	8188	Yang-N-1-20230914.raw	1	3.92839e+06	19.59
	FALSE	High	[K].DIQLARR.[I]		1	1	4	H3	H3 [124-130]		1	871.511	1.572	24.83	150.8	95.9	26.42	10.12	1.99646e+06	1.22284e+06	1.02109e+06	3.30486e+06	3.64011e+06	2.83944e+06	7.15857e+06	5.19473e+06	4.29117e+06	3.30486e+06	3.90089e+06	3.27312e+06		High	High	Peak Found	Peak Found	High	Peak Found	High	1.8	11.8
		Checked	Confidence	Identifying Node	PSM Ambiguity	Annotated Sequence	Modifications	# Proteins	Master Protein Accessions	Protein Accessions	# Missed Cleavages	Charge	DeltaCn	Search Engine Rank	MH+ [Da]	Theo. MH+ [Da]	Deltam/z [Da]	Intensity	Isolation Interference [%]	Comp. Voltage [V]	Ion Inject Time [ms]	RT [min]	First Scan	Spectrum File	# Protein Groups	Precursor Abundance	Apex RT [min]
		FALSE	High	Sequest HT (A4)	Unambiguous	[K].DIQLARR.[I]		1	H3	H3	1	2	0	1	871.504	871.511	-0.0035	519845	1.20664	-55	100	11.6109	2880	Yang-E-3-20230914.raw	1	1002940	11.63
		FALSE	High	Sequest HT (A4)	Unambiguous	[K].DIQLARR.[I]		1	H3	H3	1	2	0	1	871.494	871.511	-0.00826	184402	10.3515	-55	100	11.796	4152	Yang-N-2-20230914.raw	1	3.64011e+06	11.89
		FALSE	High	Sequest HT (A4)	Unambiguous	[K].DIQLARR.[I]		1	H3	H3	1	2	0	1	871.494	871.511	-0.00832	23160.7	25.7699	-55	100	11.7289	2963	Yang-E-2-20230914.raw	1	1.22284e+06	11.85
		FALSE	High	Sequest HT (A4)	Unambiguous	[K].DIQLARR.[I]		1	H3	H3	1	2	0	1	871.501	871.511	-0.0049	1.5477e+06	7.56543	-55	100	11.8109	3739	Yang-C-3-20230914.raw	1	1.00405e+06	11.77
	FALSE	High	[R].TKQTAR.[K]	1xAcetylation [K2]	1	1	11	H3	H3 [4-9]	H3 1xAcetylation [K5]	1	746.416	0.868	16.01	106	113.5	16.25	7.03	208999	234801	242466	1.02447e+06	996275	1.0178e+06	749392	997458	1.01897e+06	1.02447e+06	1.06765e+06	1.17326e+06		Peak Found	Peak Found	Peak Found	High	High	High	High	1.8	5.95
		Checked	Confidence	Identifying Node	PSM Ambiguity	Annotated Sequence	Modifications	# Proteins	Master Protein Accessions	Protein Accessions	# Missed Cleavages	Charge	DeltaCn	Search Engine Rank	MH+ [Da]	Theo. MH+ [Da]	Deltam/z [Da]	Intensity	Isolation Interference [%]	Comp. Voltage [V]	Ion Inject Time [ms]	RT [min]	First Scan	Spectrum File	# Protein Groups	Precursor Abundance	Apex RT [min]
		FALSE	High	Sequest HT (A4)	Unambiguous	[R].TkQTAR.[K]	K2(Acetyla)	1	H3	H3	1	2	0	1	746.425	746.416	0.0046	25587.1	95.8522	-55	100	5.9636	1772	Yang-N-2-20230914.raw	1	10620.5	5.93
		FALSE	High	Sequest HT (A4)	Unambiguous	[R].TkQTAR.[K]	K2(Acetyla)	1	H3	H3	1	2	0	1	746.402	746.416	-0.00675	366520	17.4596	-55	100	5.9815	1777	Yang-N-1-20230914.raw	1	911312	6.05
		FALSE	High	Sequest HT (A4)	Unambiguous	[R].TkQTAR.[K]	K2(Acetyla)	1	H3	H3	1	2	0	1	746.424	746.416	0.0043	5602.56	90.2144	-55	100	5.9119	1754	Yang-N-2-20230914.raw	1	10620.5	5.93
		FALSE	High	Sequest HT (A4)	Unambiguous	[R].TkQTAR.[K]	K2(Acetyla)	1	H3	H3	1	2	0	1	746.424	746.416	0.00423	22786.7	94.7154	-55	100	5.992	1795	Yang-N-3-20230914.raw	1	22649.8	6.01
		FALSE	High	Sequest HT (A4)	Unambiguous	[R].TkQTAR.[K]	K2(Acetyla)	1	H3	H3	1	2	0	1	746.402	746.416	-0.00672	26644.6	58.3546	-55	100	5.9286	1760	Yang-N-1-20230914.raw	1	911312	6.05
		FALSE	High	Sequest HT (A4)	Unambiguous	[R].TkQTAR.[K]	K2(Acetyla)	1	H3	H3	1	2	0	1	746.402	746.416	-0.00681	1.18005e+06	32.2373	-55	100	6.0743	1812	Yang-N-1-20230914.raw	1	911312	6.05
		FALSE	High	Sequest HT (A4)	Unambiguous	[R].TkQTAR.[K]	K2(Acetyla)	1	H3	H3	1	2	0	1	746.423	746.416	0.00356	20165	79.4724	-55	100	5.8511	1567	Yang-C-1-20230914.raw	1	18903.2	5.87
		FALSE	High	Sequest HT (A4)	Unambiguous	[R].TkQTAR.[K]	K2(Acetyla)	1	H3	H3	1	2	0	1	746.422	746.416	0.00304	20209.5	80.5301	-55	100	5.845	1659	Yang-C-2-20230914.raw	1	22607	5.88
		FALSE	High	Sequest HT (A4)	Unambiguous	[R].TkQTAR.[K]	K2(Acetyla)	1	H3	H3	1	2	0	1	746.402	746.416	-0.00687	32722	76.6917	-55	100	7.7318	2465	Yang-N-1-20230914.raw	1	91856.5	8
		FALSE	High	Sequest HT (A4)	Unambiguous	[R].TkQTAR.[K]	K2(Acetyla)	1	H3	H3	1	2	0	1	746.421	746.416	0.00283	24864.7	86.0471	-55	100	5.8614	1666	Yang-C-2-20230914.raw	1	22607	5.88
		FALSE	High	Sequest HT (A4)	Unambiguous	[R].TkQTAR.[K]	K2(Acetyla)	1	H3	H3	1	2	0	1	746.423	746.416	0.00396	22037.1	79.905	-55	100	5.835	1579	Yang-C-3-20230914.raw	1	19020.5	5.85
	FALSE	High	[K].KPHRYRPGTVALR.[E]		1	1	12	H3	H3 [38-50]		1	1550.9	0.156	29.19	29.1	172.2	34.48	11.57	10310.9	17218.3	17643.4	474457	350773	375457	36970.9	73145	74147.1	474457	375903	432802		Peak Found	Peak Found	Peak Found	High	High	High	High	1.76	14.35
		Checked	Confidence	Identifying Node	PSM Ambiguity	Annotated Sequence	Modifications	# Proteins	Master Protein Accessions	Protein Accessions	# Missed Cleavages	Charge	DeltaCn	Search Engine Rank	MH+ [Da]	Theo. MH+ [Da]	Deltam/z [Da]	Intensity	Isolation Interference [%]	Comp. Voltage [V]	Ion Inject Time [ms]	RT [min]	First Scan	Spectrum File	# Protein Groups	Precursor Abundance	Apex RT [min]
		FALSE	High	Sequest HT (A4)	Unambiguous	[K].KPHRYRPGTVALR.[E]		1	H3	H3	1	4	0	1	1550.88	1550.9	-0.00678	65026	56.3593	-55	100	13.4698	5050	Yang-N-1-20230914.raw	1	56353.5	13.43
		FALSE	High	Sequest HT (A4)	Unambiguous	[K].KPHRYRPGTVALR.[E]		1	H3	H3	1	4	0	1	1550.88	1550.9	-0.00687	111277	64.9671	-55	100	13.4624	4915	Yang-N-2-20230914.raw	1	99129.2	13.38
		FALSE	High	Sequest HT (A4)	Unambiguous	[K].KPHRYRPGTVALR.[E]		1	H3	H3	1	4	0	1	1550.87	1550.9	-0.00736	40193.6	68.2693	-55	100	13.3718	5002	Yang-N-1-20230914.raw	1	56353.5	13.43
		FALSE	High	Sequest HT (A4)	Unambiguous	[K].KPHRYRPGTVALR.[E]		1	H3	H3	1	4	0	1	1550.87	1550.9	-0.00764	90371.7	66.5959	-55	100	14.0682	5352	Yang-N-3-20230914.raw	1	410944	14.18
		FALSE	High	Sequest HT (A4)	Unambiguous	[K].KPHRYRPGTVALR.[E]		1	H3	H3	1	4	0	1	1550.87	1550.9	-0.0073	128047	60.4885	-55	100	14.1389	5396	Yang-N-1-20230914.raw	1
		FALSE	High	Sequest HT (A4)	Unambiguous	[K].KPHRYRPGTVALR.[E]		1	H3	H3	1	4	0	1	1550.87	1550.9	-0.00697	46880.8	74.8996	-55	100	13.3522	4993	Yang-N-1-20230914.raw	1	56353.5	13.43
		FALSE	High	Sequest HT (A4)	Unambiguous	[K].KPHRYRPGTVALR.[E]		1	H3	H3	1	4	0	1	1550.87	1550.9	-0.00715	20127.3	77.8546	-55	100	13.6485	4719	Yang-C-2-20230914.raw	1
		FALSE	High	Sequest HT (A4)	Unambiguous	[K].KPHRYRPGTVALR.[E]		1	H3	H3	1	4	0	1	1550.87	1550.9	-0.00773	46050.6	65.3951	-55	100	13.3387	4989	Yang-N-3-20230914.raw	1	63512.4	13.34
		FALSE	High	Sequest HT (A4)	Unambiguous	[K].KPHRYRPGTVALR.[E]		1	H3	H3	1	4	0	1	1550.87	1550.9	-0.0077	105847	58.0016	-55	100	13.4414	4905	Yang-N-2-20230914.raw	1	99129.2	13.38
		FALSE	High	Sequest HT (A4)	Unambiguous	[K].KPHRYRPGTVALR.[E]		1	H3	H3	1	4	0	1	1550.87	1550.9	-0.00694	91509.1	61.4303	-55	100	14.1078	5379	Yang-N-1-20230914.raw	1
		FALSE	High	Sequest HT (A4)	Unambiguous	[K].KPHRYRPGTVALR.[E]		1	H3	H3	1	4	0	1	1550.88	1550.9	-0.00663	25910.6	86.5797	-55	100	13.8511	5114	Yang-N-2-20230914.raw	1	99129.2	13.38
		FALSE	High	Sequest HT (A4)	Unambiguous	[K].KPHRYRPGTVALR.[E]		1	H3	H3	1	4	0	1	1550.89	1550.9	-0.0041	51884.6	12.6715	-55	100	15.0969	5337	Yang-C-3-20230914.raw	1	56133.7	15.05
	FALSE	High	[R].YRPGTVALREIRK.[Y]		1	1	3	H3	H3 [42-54]		2	1558.92	0.01			125.4		9.89				350406	287274	251156				350406	307855	289516		n/a	n/a	n/a	Peak Found	Peak Found	High	High	1.72	14.27
		Checked	Confidence	Identifying Node	PSM Ambiguity	Annotated Sequence	Modifications	# Proteins	Master Protein Accessions	Protein Accessions	# Missed Cleavages	Charge	DeltaCn	Search Engine Rank	MH+ [Da]	Theo. MH+ [Da]	Deltam/z [Da]	Intensity	Isolation Interference [%]	Comp. Voltage [V]	Ion Inject Time [ms]	RT [min]	First Scan	Spectrum File	# Protein Groups	Precursor Abundance	Apex RT [min]
		FALSE	High	Sequest HT (A4)	Unambiguous	[R].YRPGTVALREIRK.[Y]		1	H3	H3	2	3	0	1	1558.89	1558.92	-0.00988	234789	45.0901	-55	100	14.1193	5384	Yang-N-1-20230914.raw	1	251156	14.11
		FALSE	High	Sequest HT (A4)	Unambiguous	[R].YRPGTVALREIRK.[Y]		1	H3	H3	2	3	0	1	1558.89	1558.92	-0.00964	130798	59.833	-55	100	14.4166	4984	Yang-C-3-20230914.raw	1
		FALSE	High	Sequest HT (A4)	Unambiguous	[R].YRPGTVALREIRK.[Y]		1	H3	H3	2	3	0	1	1558.89	1558.92	-0.00939	132672	62.9953	-55	100	14.0899	5369	Yang-N-1-20230914.raw	1	251156	14.11
	FALSE	High	[R].KSTGGKAPR.[K]	1xAcetylation [K6]	1	1	9	H3	H3 [10-18]	H3 1xAcetylation [K15]	2	943.532	0.7	22.46	83.6	119.4	86.41	86.12	62686.4	6.95143e+06	5.96224e+06	4.1061e+07	3.3411e+07	282069	224770	2.95304e+07	2.50565e+07	4.1061e+07	3.58047e+07	325151		Peak Found	High	Peak Found	Peak Found	High	High	High	1.65	7.17
		Checked	Confidence	Identifying Node	PSM Ambiguity	Annotated Sequence	Modifications	# Proteins	Master Protein Accessions	Protein Accessions	# Missed Cleavages	Charge	DeltaCn	Search Engine Rank	MH+ [Da]	Theo. MH+ [Da]	Deltam/z [Da]	Intensity	Isolation Interference [%]	Comp. Voltage [V]	Ion Inject Time [ms]	RT [min]	First Scan	Spectrum File	# Protein Groups	Precursor Abundance	Apex RT [min]
		FALSE	High	Sequest HT (A4)	Unambiguous	[R].KSTGGkAPR.[K]	K6(Acetyla)	1	H3	H3	2	2	0	1	943.516	943.532	-0.00777	1.31955e+06	1.65569	-55	100	7.3872	2077	Yang-C-3-20230914.raw	1	15717865	7.15
		FALSE	High	Sequest HT (A4)	Unambiguous	[R].KSTGGkAPR.[K]	K6(Acetyla)	1	H3	H3	2	2	0	1	943.523	943.532	-0.00466	4725415	48.4689	-55	21.449	7.1466	1543	Yang-E-2-20230914.raw	1
		FALSE	High	Sequest HT (A4)	Unambiguous	[R].KSTGGkAPR.[K]	K6(Acetyla)	1	H3	H3	2	2	0	1	943.521	943.532	-0.00543	133572	29.1355	-55	100	8.4352	2408	Yang-C-3-20230914.raw	1	155025	8.33
		FALSE	High	Sequest HT (A4)	Unambiguous	[R].KSTGGkAPR.[K]	K6(Acetyla)	1	H3	H3	2	2	0	1	943.545	943.532	0.00651	363748	33.8487	-55	36.915	9.5358	3100	Yang-N-2-20230914.raw	1
		FALSE	High	Sequest HT (A4)	Unambiguous	[R].KSTGGkAPR.[K]	K6(Acetyla)	1	H3	H3	2	2	0	1	943.518	943.532	-0.00716	113610	34.1074	-55	100	7.5716	2133	Yang-C-3-20230914.raw	1	15717865	7.15
		FALSE	High	Sequest HT (A4)	Unambiguous	[R].KSTGGkAPR.[K]	K6(Acetyla)	1	H3	H3	2	2	0	1	943.517	943.532	-0.00741	23493.6	88.45	-55	100	14.9858	5717	Yang-N-2-20230914.raw	1	31798.1	14.89
		FALSE	High	Sequest HT (A4)	Unambiguous	[R].KSTGGkAPR.[K]	K6(Acetyla)	1	H3	H3	2	2	0	1	943.542	943.532	0.00513	934344	42.9216	-55	35.628	9.5708	3177	Yang-N-1-20230914.raw	1
		FALSE	High	Sequest HT (A4)	Unambiguous	[R].KSTGGkAPR.[K]	K6(Acetyla)	1	H3	H3	2	2	0	1	943.538	943.532	0.00303	502008	51.6017	-55	100	9.793	2793	Yang-C-1-20230914.raw	1
		FALSE	High	Sequest HT (A4)	Unambiguous	[R].KSTGGkAPR.[K]	K6(Acetyla)	1	H3	H3	2	2	0	1	943.514	943.532	-0.00875	95600	28.8334	-55	100	8.1259	2632	Yang-N-1-20230914.raw	1	246959	8.29
	FALSE	High	[K].DIQLAR.[R]		1	1	9	H3	H3 [124-129]		0	715.41	0.859	97.75	88.6	103.1	92.27	28.55	92898.7	156628	512441	854167	722886	411703	333100	665372	2.15355e+06	854167	774675	474584		Peak Found	High	Peak Found	High	High	High	High	1.53	15.69
		Checked	Confidence	Identifying Node	PSM Ambiguity	Annotated Sequence	Modifications	# Proteins	Master Protein Accessions	Protein Accessions	# Missed Cleavages	Charge	DeltaCn	Search Engine Rank	MH+ [Da]	Theo. MH+ [Da]	Deltam/z [Da]	Intensity	Isolation Interference [%]	Comp. Voltage [V]	Ion Inject Time [ms]	RT [min]	First Scan	Spectrum File	# Protein Groups	Precursor Abundance	Apex RT [min]
		FALSE	High	Sequest HT (A4)	Unambiguous	[K].DIQLAR.[R]		1	H3	H3	0	2	0	1	715.4	715.41	-0.0047	1.02166e+06	3.3888	-55	100	15.7385	5649	Yang-C-3-20230914.raw	1	433708	15.72
		FALSE	High	Sequest HT (A4)	Unambiguous	[K].DIQLAR.[R]		1	H3	H3	0	2	0	1	715.395	715.41	-0.00714	180701	17.5815	-55	67.236	15.5745	6025	Yang-N-2-20230914.raw	1	692240	15.6
		FALSE	High	Sequest HT (A4)	Unambiguous	[K].DIQLAR.[R]		1	H3	H3	0	2	0	1	715.397	715.41	-0.00653	46176.5	71.5504	-55	100	16.8778	6798	Yang-N-1-20230914.raw	1	30795.7	16.85
		FALSE	High	Sequest HT (A4)	Unambiguous	[K].DIQLAR.[R]		1	H3	H3	0	2	0	1	715.397	715.41	-0.00616	127547	10.4097	-55	100	15.6462	4545	Yang-E-2-20230914.raw	1	150695	15.67
		FALSE	High	Sequest HT (A4)	Unambiguous	[K].DIQLAR.[R]		1	H3	H3	0	2	0	1	715.398	715.41	-0.00571	28160.6	75.031	-55	100	17.0785	6863	Yang-N-3-20230914.raw	1	25289.6	17.04
		FALSE	High	Sequest HT (A4)	Unambiguous	[K].DIQLAR.[R]		1	H3	H3	0	2	0	1	715.396	715.41	-0.00708	9087.57	91.0523	-55	100	16.5458	6600	Yang-N-3-20230914.raw	1	25289.6	17.04
		FALSE	High	Sequest HT (A4)	Unambiguous	[K].DIQLAR.[R]		1	H3	H3	0	2	0	1	715.399	715.41	-0.00531	89007.4	37.0569	-55	100	15.6039	6153	Yang-N-1-20230914.raw	1
		FALSE	High	Sequest HT (A4)	Unambiguous	[K].DIQLAR.[R]		1	H3	H3	0	2	0	1	715.397	715.41	-0.00629	21680.7	82.5521	-55	100	16.8517	6684	Yang-N-2-20230914.raw	1	30646.2	16.86
		FALSE	High	Sequest HT (A4)	Unambiguous	[K].DIQLAR.[R]		1	H3	H3	0	2	0	1	715.396	715.41	-0.00668	24957.4	77.3506	-55	100	16.9273	6720	Yang-N-2-20230914.raw	1	30646.2	16.86
	FALSE	High	[R].LVREIAQDFKTDLR.[F]		1	1	2	H3	H3 [71-84]		2	1703.94																			No Quan Values	n/a	n/a	n/a	n/a	n/a	High	High	1.51
		Checked	Confidence	Identifying Node	PSM Ambiguity	Annotated Sequence	Modifications	# Proteins	Master Protein Accessions	Protein Accessions	# Missed Cleavages	Charge	DeltaCn	Search Engine Rank	MH+ [Da]	Theo. MH+ [Da]	Deltam/z [Da]	Intensity	Isolation Interference [%]	Comp. Voltage [V]	Ion Inject Time [ms]	RT [min]	First Scan	Spectrum File	# Protein Groups	Precursor Abundance	Apex RT [min]
		FALSE	High	Sequest HT (A4)	Unambiguous	[R].LVREIAQDFKTDLR.[F]		1	H3	H3	2	3	0	1	1703.92	1703.94	-0.00889	48007.1	72.1395	-55	100	23.4975	10053	Yang-N-1-20230914.raw	1
		FALSE	High	Sequest HT (A4)	Unambiguous	[R].LVREIAQDFKTDLR.[F]		1	H3	H3	2	4	0	1	1703.93	1703.94	-0.0044	30819.2	76.6191	-55	100	20.6826	8060	Yang-C-3-20230914.raw	1
	FALSE	High	[R].VTIMPKDIQLARR.[I]	1xOxidation [M4]	1	1	3	H3	H3 [118-130]		2	1556.89	0.73	19.33	88.4	117.6	19.14	10.18	22004.7	24544.7	27682.6	131308	148735	120248	78900.5	104268	116337	131308	159390	138614		Peak Found	Peak Found	Peak Found	High	High	Peak Found	High	1.48	16.53
		Checked	Confidence	Identifying Node	PSM Ambiguity	Annotated Sequence	Modifications	# Proteins	Master Protein Accessions	Protein Accessions	# Missed Cleavages	Charge	DeltaCn	Search Engine Rank	MH+ [Da]	Theo. MH+ [Da]	Deltam/z [Da]	Intensity	Isolation Interference [%]	Comp. Voltage [V]	Ion Inject Time [ms]	RT [min]	First Scan	Spectrum File	# Protein Groups	Precursor Abundance	Apex RT [min]
		FALSE	High	Sequest HT (A4)	Unambiguous	[R].VTImPKDIQLARR.[I]	M4(Oxidation)	1	H3	H3	2	4	0	1	1556.88	1556.89	-0.00376	64062.4	22.8281	-55	100	16.5753	6048	Yang-C-3-20230914.raw	1	67473.4	16.58
		FALSE	High	Sequest HT (A4)	Unambiguous	[R].VTImPKDIQLARR.[I]	M4(Oxidation)	1	H3	H3	2	4	0	1	1556.87	1556.89	-0.007	73258.4	35.2487	-55	100	16.615	6634	Yang-N-3-20230914.raw	1	131308	16.65
		FALSE	High	Sequest HT (A4)	Unambiguous	[R].VTImPKDIQLARR.[I]	M4(Oxidation)	1	H3	H3	2	4	0	1	1556.87	1556.89	-0.00657	128075	17.0103	-55	100	16.3628	6433	Yang-N-2-20230914.raw	1	148735	16.35
	FALSE	High	[R].YRPGTVALREIR.[K]		1	1	3	H3	H3 [42-53]		1	1430.82	1.055	12.5	96.2	91.2	5.8	10.42	1.23655e+06	1166217	1087193	4.33005e+06	3.62621e+06	4154744	4.4338e+06	4.95421e+06	4.56897e+06	4.33005e+06	3.886e+06	4.78931e+06		Peak Found	High	High	Peak Found	Peak Found	High	High	1.43	15.54
		Checked	Confidence	Identifying Node	PSM Ambiguity	Annotated Sequence	Modifications	# Proteins	Master Protein Accessions	Protein Accessions	# Missed Cleavages	Charge	DeltaCn	Search Engine Rank	MH+ [Da]	Theo. MH+ [Da]	Deltam/z [Da]	Intensity	Isolation Interference [%]	Comp. Voltage [V]	Ion Inject Time [ms]	RT [min]	First Scan	Spectrum File	# Protein Groups	Precursor Abundance	Apex RT [min]
		FALSE	High	Sequest HT (A4)	Unambiguous	[R].YRPGTVALREIR.[K]		1	H3	H3	1	3	0	1	1430.8	1430.82	-0.00834	26079.3	70.1545	-55	100	15.5595	4505	Yang-E-2-20230914.raw	1	1166217	15.66
		FALSE	High	Sequest HT (A4)	Unambiguous	[R].YRPGTVALREIR.[K]		1	H3	H3	1	3	0	1	1430.8	1430.82	-0.00822	63087.2	26.5501	-55	100	15.5435	4454	Yang-E-1-20230914.raw	1	1087193	15.61
		FALSE	High	Sequest HT (A4)	Unambiguous	[R].YRPGTVALREIR.[K]		1	H3	H3	1	3	0	1	1430.8	1430.82	-0.00849	52292.8	90.8273	-55	100	15.237	5966	Yang-N-1-20230914.raw	1	4154744	15.39
	FALSE	High	[K].YQKSTELLIR.[K]	1xAcetylation [K3]	1	1	1	H3	H3 [55-64]	H3 1xAcetylation [K57]	1	1292.72	1.21	6.56	115.6	91.5	4.72	3.91	331047	285429	263368	939422	872602	869311	1.18701e+06	1.21253e+06	1.10681e+06	939422	935117	1.00208e+06		Peak Found	Peak Found	Peak Found	Peak Found	Peak Found	Peak Found	High	1.42	25.27
		Checked	Confidence	Identifying Node	PSM Ambiguity	Annotated Sequence	Modifications	# Proteins	Master Protein Accessions	Protein Accessions	# Missed Cleavages	Charge	DeltaCn	Search Engine Rank	MH+ [Da]	Theo. MH+ [Da]	Deltam/z [Da]	Intensity	Isolation Interference [%]	Comp. Voltage [V]	Ion Inject Time [ms]	RT [min]	First Scan	Spectrum File	# Protein Groups	Precursor Abundance	Apex RT [min]
		FALSE	High	Sequest HT (A4)	Unambiguous	[K].YQkSTELLIR.[K]	K3(Acetyla)	1	H3	H3	1	2	0	1	1292.71	1292.72	-0.00556	78944.5	0	-55	100	25.2267	10329	Yang-C-3-20230914.raw	1	521332	25.27
	FALSE	High	[K].QLATKAAR.[K]		1	1	1	H3	H3 [20-27]		1	858.516	0.01			116.4		9.62				1.43825e+06	1233400	1.38824e+06				1.43825e+06	1.32176e+06	1.60027e+06		n/a	n/a	n/a	Peak Found	Peak Found	Peak Found	High	1.42	9.16
		Checked	Confidence	Identifying Node	PSM Ambiguity	Annotated Sequence	Modifications	# Proteins	Master Protein Accessions	Protein Accessions	# Missed Cleavages	Charge	DeltaCn	Search Engine Rank	MH+ [Da]	Theo. MH+ [Da]	Deltam/z [Da]	Intensity	Isolation Interference [%]	Comp. Voltage [V]	Ion Inject Time [ms]	RT [min]	First Scan	Spectrum File	# Protein Groups	Precursor Abundance	Apex RT [min]
		FALSE	High	Sequest HT (A4)	Unambiguous	[K].QLATKAAR.[K]		1	H3	H3	1	2	0	1	858.503	858.516	-0.00624	1.34218e+06	0.263419	-55	100	9.1759	2634	Yang-C-3-20230914.raw	1	1.24101e+06	9.18
	FALSE	High	[R].KSTGGKAPR.[K]	2xAcetylation [K1; K6]	1	1	3	H3	H3 [10-18]	H3 2xAcetylation [K10; K15]	2	985.543																			No Quan Values	High	High	High	n/a	n/a	n/a	High	1.38
		Checked	Confidence	Identifying Node	PSM Ambiguity	Annotated Sequence	Modifications	# Proteins	Master Protein Accessions	Protein Accessions	# Missed Cleavages	Charge	DeltaCn	Search Engine Rank	MH+ [Da]	Theo. MH+ [Da]	Deltam/z [Da]	Intensity	Isolation Interference [%]	Comp. Voltage [V]	Ion Inject Time [ms]	RT [min]	First Scan	Spectrum File	# Protein Groups	Precursor Abundance	Apex RT [min]
		FALSE	High	Sequest HT (A4)	Unambiguous	[R].kSTGGkAPR.[K]	K1(Acetyla); K6(Acetyla)	1	H3	H3	2	2	0	1	985.535	985.543	-0.00387	3248606	1.15027	-55	100	9.7732	2215	Yang-E-3-20230914.raw	1
		FALSE	High	Sequest HT (A4)	Unambiguous	[R].kSTGGkAPR.[K]	K1(Acetyla); K6(Acetyla)	1	H3	H3	2	2	0	1	985.526	985.543	-0.00824	919624	9.35417	-55	100	9.8895	2324	Yang-E-2-20230914.raw	1
		FALSE	High	Sequest HT (A4)	Unambiguous	[R].kSTGGkAPR.[K]	K1(Acetyla); K6(Acetyla)	1	H3	H3	2	2	0	1	985.525	985.543	-0.00878	409401	25.9002	-55	51.819	9.8277	2208	Yang-E-1-20230914.raw	1
	FALSE	High	[-].MARTKQTAR.[K]		1	1	1	H3	H3 [1-9]		2	1062.58	0.077	45.01	2.7	36.2	39.72	46.33		1671.32	3009.15	128000	70918.9	173777		7099.95	12646.1	128000	75999.6	200318		n/a	Peak Found	Peak Found	Peak Found	Peak Found	Peak Found	High	1.35	9.89
		Checked	Confidence	Identifying Node	PSM Ambiguity	Annotated Sequence	Modifications	# Proteins	Master Protein Accessions	Protein Accessions	# Missed Cleavages	Charge	DeltaCn	Search Engine Rank	MH+ [Da]	Theo. MH+ [Da]	Deltam/z [Da]	Intensity	Isolation Interference [%]	Comp. Voltage [V]	Ion Inject Time [ms]	RT [min]	First Scan	Spectrum File	# Protein Groups	Precursor Abundance	Apex RT [min]
		FALSE	High	Sequest HT (A4)	Unambiguous	[-].MARTKQTAR.[K]		1	H3	H3	2	3	0	1	1062.59	1062.58	0.00087	1.89977e+06	13.1976	-55	100	10.0358	2916	Yang-C-1-20230914.raw	1	494883	9.99
	FALSE	High	[K].STELLIR.[K]		1	1	7	H3	H3 [58-64]		0	831.493	0.921	13.44	83.8	93	11.32	8.28	73564.5	77682.3	69024.3	286469	300312	292723	263775	330002	290077	286469	321827	337431		Peak Found	High	Peak Found	High	High	High	High	1.33	20.02
		Checked	Confidence	Identifying Node	PSM Ambiguity	Annotated Sequence	Modifications	# Proteins	Master Protein Accessions	Protein Accessions	# Missed Cleavages	Charge	DeltaCn	Search Engine Rank	MH+ [Da]	Theo. MH+ [Da]	Deltam/z [Da]	Intensity	Isolation Interference [%]	Comp. Voltage [V]	Ion Inject Time [ms]	RT [min]	First Scan	Spectrum File	# Protein Groups	Precursor Abundance	Apex RT [min]
		FALSE	High	Sequest HT (A4)	Unambiguous	[K].STELLIR.[K]		1	H3	H3	0	2	0	1	831.478	831.493	-0.00768	189549	67.4213	-55	100	19.9984	8326	Yang-N-3-20230914.raw	1	160403	19.97
		FALSE	High	Sequest HT (A4)	Unambiguous	[K].STELLIR.[K]		1	H3	H3	0	2	0	1	831.483	831.493	-0.00515	183033	43.4036	-55	100	20.0973	7764	Yang-C-3-20230914.raw	1	140710	20.05
		FALSE	High	Sequest HT (A4)	Unambiguous	[K].STELLIR.[K]		1	H3	H3	0	2	0	1	831.477	831.493	-0.00826	172812	66.1067	-55	100	20.009	8256	Yang-N-2-20230914.raw	1	151711	20
		FALSE	High	Sequest HT (A4)	Unambiguous	[K].STELLIR.[K]		1	H3	H3	0	1	0	1	831.478	831.493	-0.01523	151293	59.1855	-55	100	19.5602	7627	Yang-C-2-20230914.raw	1	112184	19.52
		FALSE	High	Sequest HT (A4)	Unambiguous	[K].STELLIR.[K]		1	H3	H3	0	2	0	1	831.479	831.493	-0.00735	219236	55.8753	-55	100	20.0626	8400	Yang-N-1-20230914.raw	1	160456	20.01
		FALSE	High	Sequest HT (A4)	Unambiguous	[K].STELLIR.[K]		1	H3	H3	0	2	0	1	831.477	831.493	-0.00817	180647	38.741	-55	100	20.0997	7890	Yang-C-1-20230914.raw	1	146537	20.05
		FALSE	High	Sequest HT (A4)	Unambiguous	[K].STELLIR.[K]		1	H3	H3	0	1	0	1	831.481	831.493	-0.01267	25224.7	82.9909	-55	100	19.5004	6124	Yang-E-2-20230914.raw	1	30341	19.5
	FALSE	High	[K].RVTIMPK.[D]		1	1	1	H3	H3 [117-123]		1	844.507	0.489	12.15	55.3	115.3	8.2	13.03	32185.3	30413.6	32310.9	277617	202132	233968	115404	129200	135788	277617	216613	269703		Peak Found	Peak Found	Peak Found	Peak Found	Peak Found	Peak Found	High	1.28	11.47
		Checked	Confidence	Identifying Node	PSM Ambiguity	Annotated Sequence	Modifications	# Proteins	Master Protein Accessions	Protein Accessions	# Missed Cleavages	Charge	DeltaCn	Search Engine Rank	MH+ [Da]	Theo. MH+ [Da]	Deltam/z [Da]	Intensity	Isolation Interference [%]	Comp. Voltage [V]	Ion Inject Time [ms]	RT [min]	First Scan	Spectrum File	# Protein Groups	Precursor Abundance	Apex RT [min]
		FALSE	High	Sequest HT (A4)	Unambiguous	[K].RVTIMPK.[D]		1	H3	H3	1	2	0	1	844.495	844.507	-0.00614	145227	23.8705	-55	100	11.4017	3548	Yang-C-3-20230914.raw	1	165457	11.41
	FALSE	High	[K].RVTIMPK.[D]	1xOxidation [M5]	1	1	2	H3	H3 [117-123]		1	860.502	2.035	62.45	137	67.3	26.21	92.89	119317		148127	445965	7947.05	220038	427826		622507	445965	8516.39	253645		Peak Found	n/a	Peak Found	Peak Found	Peak Found	High	High	1.28	9.87
		Checked	Confidence	Identifying Node	PSM Ambiguity	Annotated Sequence	Modifications	# Proteins	Master Protein Accessions	Protein Accessions	# Missed Cleavages	Charge	DeltaCn	Search Engine Rank	MH+ [Da]	Theo. MH+ [Da]	Deltam/z [Da]	Intensity	Isolation Interference [%]	Comp. Voltage [V]	Ion Inject Time [ms]	RT [min]	First Scan	Spectrum File	# Protein Groups	Precursor Abundance	Apex RT [min]
		FALSE	High	Sequest HT (A4)	Unambiguous	[K].RVTImPK.[D]	M5(Oxidation)	1	H3	H3	1	2	0	1	860.488	860.502	-0.00726	495684	21.9739	-55	100	9.876	3349	Yang-N-1-20230914.raw	1	220038	9.82
		FALSE	High	Sequest HT (A4)	Unambiguous	[K].RVTImPK.[D]	M5(Oxidation)	1	H3	H3	1	2	0	1	860.496	860.502	-0.00296	433571	25.5886	-55	100	10.1151	3002	Yang-C-3-20230914.raw	1	197157	10.05
	FALSE	High	[K].STELLIRKLPFQR.[L]		1	1	1	H3	H3 [58-70]		2	1600.95	1.319	29.11	123.1	93.3	25.95	18.16	47119.2	68063.2	57511.1	183173	127821	170582	168952	289140	241693	183173	136979	196636		Peak Found	Peak Found	Peak Found	Peak Found	Peak Found	Peak Found	High	1.27	25.13
		Checked	Confidence	Identifying Node	PSM Ambiguity	Annotated Sequence	Modifications	# Proteins	Master Protein Accessions	Protein Accessions	# Missed Cleavages	Charge	DeltaCn	Search Engine Rank	MH+ [Da]	Theo. MH+ [Da]	Deltam/z [Da]	Intensity	Isolation Interference [%]	Comp. Voltage [V]	Ion Inject Time [ms]	RT [min]	First Scan	Spectrum File	# Protein Groups	Precursor Abundance	Apex RT [min]
		FALSE	High	Sequest HT (A4)	Unambiguous	[K].STELLIRKLPFQR.[L]		1	H3	H3	2	3	0	1	1600.94	1600.95	-0.00476	7336.66	80.4292	-55	100	25.0283	10231	Yang-C-3-20230914.raw	1	89868.9	25.09
	FALSE	High	[K].AARKSAPTTGGVK.[K]		1	1	1	H3	H3 [25-37]		2	1243.71	2.27	35.84	143.4	63.2	15.59	36.67	145241	92957.1	125802	301970	129267	199039	520782	394891	528689	301970	138528	229439		Peak Found	Peak Found	Peak Found	Peak Found	Peak Found	Peak Found	High	1.26	9.53
		Checked	Confidence	Identifying Node	PSM Ambiguity	Annotated Sequence	Modifications	# Proteins	Master Protein Accessions	Protein Accessions	# Missed Cleavages	Charge	DeltaCn	Search Engine Rank	MH+ [Da]	Theo. MH+ [Da]	Deltam/z [Da]	Intensity	Isolation Interference [%]	Comp. Voltage [V]	Ion Inject Time [ms]	RT [min]	First Scan	Spectrum File	# Protein Groups	Precursor Abundance	Apex RT [min]
		FALSE	High	Sequest HT (A4)	Unambiguous	[K].AARKSAPTTGGVK.[K]		1	H3	H3	2	3	0	1	1243.7	1243.71	-0.005	66587.9	89.3916	-55	100	9.5519	2728	Yang-C-3-20230914.raw	1	209850	9.56
	FALSE	High	[R].EIAQDFK.[T]		1	1	1	H3	H3 [74-80]		0	850.431																			No Quan Values	n/a	n/a	n/a	n/a	n/a	n/a	High	1.25
		Checked	Confidence	Identifying Node	PSM Ambiguity	Annotated Sequence	Modifications	# Proteins	Master Protein Accessions	Protein Accessions	# Missed Cleavages	Charge	DeltaCn	Search Engine Rank	MH+ [Da]	Theo. MH+ [Da]	Deltam/z [Da]	Intensity	Isolation Interference [%]	Comp. Voltage [V]	Ion Inject Time [ms]	RT [min]	First Scan	Spectrum File	# Protein Groups	Precursor Abundance	Apex RT [min]
		FALSE	High	Sequest HT (A4)	Unambiguous	[R].EIAQDFK.[T]		1	H3	H3	0	2	0	1	850.418	850.431	-0.00646	107940	42.4548	-55	100	14.708	5143	Yang-C-3-20230914.raw	1
	FALSE	High	[K].YQKSTELLIR.[K]		1	1	4	H3	H3 [55-64]		1	1250.71	0.892	16.97	66.9	75.1	9.88	20.24	359412	342571	285401	1.91231e+06	1.22474e+06	1.25382e+06	1.28872e+06	1.45528e+06	1.19941e+06	1.91231e+06	1.31248e+06	1.44532e+06		Peak Found	High	Peak Found	Peak Found	High	Peak Found	High	1.22	15.87
		Checked	Confidence	Identifying Node	PSM Ambiguity	Annotated Sequence	Modifications	# Proteins	Master Protein Accessions	Protein Accessions	# Missed Cleavages	Charge	DeltaCn	Search Engine Rank	MH+ [Da]	Theo. MH+ [Da]	Deltam/z [Da]	Intensity	Isolation Interference [%]	Comp. Voltage [V]	Ion Inject Time [ms]	RT [min]	First Scan	Spectrum File	# Protein Groups	Precursor Abundance	Apex RT [min]
		FALSE	High	Sequest HT (A4)	Unambiguous	[K].YQKSTELLIR.[K]		1	H3	H3	1	2	0	1	1250.7	1250.71	-0.00742	588217	9.48597	-55	100	16.0461	5800	Yang-C-3-20230914.raw	1	1.62614e+06	15.93
		FALSE	High	Sequest HT (A4)	Unambiguous	[K].YQKSTELLIR.[K]		1	H3	H3	1	2	0	1	1250.69	1250.71	-0.01071	3.11814e+06	0.264722	-55	87.798	15.9678	5889	Yang-C-2-20230914.raw	1	2.01519e+06	15.92
		FALSE	High	Sequest HT (A4)	Unambiguous	[K].YQKSTELLIR.[K]		1	H3	H3	1	2	0	1	1250.7	1250.71	-0.00748	61986.7	6.22754	-55	100	16.3422	6423	Yang-N-2-20230914.raw	1	48938.1	16.31
		FALSE	High	Sequest HT (A4)	Unambiguous	[K].YQKSTELLIR.[K]		1	H3	H3	1	2	0	1	1250.69	1250.71	-0.01004	325329	11.1486	-55	100	15.909	4670	Yang-E-2-20230914.raw	1	328551	15.88
	FALSE	High	[R].KSTGGKAPR.[K]		1	1	7	H3	H3 [10-18]		2	901.521	0.808	0.73	73.5	91	0.35	10.26	68812.3	57796.4		304759	237026	265142	246735	245525		304759	254007	305638		Peak Found	Peak Found	n/a	High	High	High	High	1.2	13.84
		Checked	Confidence	Identifying Node	PSM Ambiguity	Annotated Sequence	Modifications	# Proteins	Master Protein Accessions	Protein Accessions	# Missed Cleavages	Charge	DeltaCn	Search Engine Rank	MH+ [Da]	Theo. MH+ [Da]	Deltam/z [Da]	Intensity	Isolation Interference [%]	Comp. Voltage [V]	Ion Inject Time [ms]	RT [min]	First Scan	Spectrum File	# Protein Groups	Precursor Abundance	Apex RT [min]
		FALSE	High	Sequest HT (A4)	Unambiguous	[R].KSTGGKAPR.[K]		1	H3	H3	2	2	0	1	901.515	901.521	-0.00332	233904	67.1329	-55	100	13.9074	4849	Yang-C-2-20230914.raw	1	286248	13.92
		FALSE	High	Sequest HT (A4)	Unambiguous	[R].KSTGGKAPR.[K]		1	H3	H3	2	2	0	1	901.519	901.521	-0.00124	117522	50.2137	-55	100	13.8529	5115	Yang-N-2-20230914.raw	1	237026	13.83
		FALSE	High	Sequest HT (A4)	Unambiguous	[R].KSTGGKAPR.[K]		1	H3	H3	2	2	0	1	901.519	901.521	-0.00097	309532	24.3044	-55	100	13.8454	5239	Yang-N-1-20230914.raw	1	265142	13.84
		FALSE	High	Sequest HT (A4)	Unambiguous	[R].KSTGGKAPR.[K]		1	H3	H3	2	2	0	1	901.516	901.521	-0.00261	198543	32.8505	-55	100	13.7992	5214	Yang-N-3-20230914.raw	1	304759	13.79
		FALSE	High	Sequest HT (A4)	Unambiguous	[R].KSTGGKAPR.[K]		1	H3	H3	2	2	0	1	901.522	901.521	0.00028	286344	52.9532	-55	100	13.8831	4713	Yang-C-3-20230914.raw	1	313137	13.88
		FALSE	High	Sequest HT (A4)	Unambiguous	[R].KSTGGKAPR.[K]		1	H3	H3	2	2	0	1	901.515	901.521	-0.00326	316762	43.5629	-55	100	13.9525	4872	Yang-C-2-20230914.raw	1	286248	13.92
		FALSE	High	Sequest HT (A4)	Unambiguous	[R].KSTGGKAPR.[K]		1	H3	H3	2	2	0	1	901.514	901.521	-0.00368	281876	54.0639	-55	100	13.8529	4771	Yang-C-1-20230914.raw	1	242831	13.86
	FALSE	High	[R].KQLATKAAR.[K]	2xAcetylation [K1; K6]	1	1	1	H3	H3 [19-27]	H3 2xAcetylation [K19; K24]	2	1070.63																			No Quan Values	n/a	n/a	n/a	n/a	n/a	High	High	1.14
		Checked	Confidence	Identifying Node	PSM Ambiguity	Annotated Sequence	Modifications	# Proteins	Master Protein Accessions	Protein Accessions	# Missed Cleavages	Charge	DeltaCn	Search Engine Rank	MH+ [Da]	Theo. MH+ [Da]	Deltam/z [Da]	Intensity	Isolation Interference [%]	Comp. Voltage [V]	Ion Inject Time [ms]	RT [min]	First Scan	Spectrum File	# Protein Groups	Precursor Abundance	Apex RT [min]
		FALSE	High	Sequest HT (A4)	Unambiguous	[R].kQLATkAAR.[K]	K1(Acetyla); K6(Acetyla)	1	H3	H3	2	2	0	1		1070.61		-0.00923	899822	1.59306	-55	21.971	14.0849	5365	Yang-N-1-20230914.raw	1

## Sheet: SAPTTGGVKKPHR, K9-Acetylation 
SAPTTGGVKKPHR, K9-Acetylation
#1	b⁺	b²⁺	Seq.	y⁺	y²⁺	#2
1	88.03930	44.52329	S			13
2	159.07642	80.04185	A	1290.72769	645.86749	12
3	256.12918	128.56823	P	1219.69058	610.34893	11
4	357.17686	179.09207	T	1122.63782	561.82255	10
5	458.22454	229.61591	T	1021.59014	511.29871	9
6	515.24600	258.12664	G	920.54246	460.77487	8
7	572.26747	286.63737	G	863.52100	432.26414	7
8	671.33588	336.17158	V	806.49953	403.75340	6
9	841.44141	421.22434	K-Acetylation	707.43112	354.21920	5
10	969.53637	485.27182	K	537.32559	269.16643	4
11	1066.58914	533.79821	P	409.23063	205.11895	3
12	1203.64805	602.32766	H	312.17786	156.59257	2
13			R	175.11895	88.06311	1
