# Supplementary material for: Regulation of Disease-Resistance Genes against CWMV Infection by NbHAG1-Mediated H3K36ac
Source: Int J Mol Sci. 2024 Feb 28;25(5):2800. doi: 10.3390/ijms25052800 (PMC10931728; doi:10.3390/ijms25052800)
Supplement: Supplementary file 1 [file ijms-25-02800-s001.zip › ijms-2871725-supplementary/Table S4. Raw data of DEGs Volcano plots between OEH vs Nb.xls]

## Sheet: Sheet1
Table S4.Raw data of DEGs Volcano plots between OEH vs Nb.
gene_id	OEH1	OEH2	OEH3	Nb1	Nb2	Nb3	OEH	Nb	log2FoldChange	pvalue	padj	gene_name	gene_chr	gene_start	gene_end	gene_strand	gene_length	gene_biotype	gene_description	tf_family
novel.5562	1834.98	1813.96	1683.81	6.77221	5.84777	7.65913	1777.58	6.7597	8.0377	5.48093e-135	2.17149e-130	-	Niben261Chr15	79503756	79507245	-	3405	-	- && - && -	-
novel.5806	1669.11	1320.55	1178.97	108.355	133.524	154.14	1389.54	132.006	3.39631	4.165e-132	8.25066e-128	-	Niben261Chr16	98845101	98854888	+	9788	-	- && - && -	-
Niben261Chr03g0012007	1869.85	1717.49	1576.44	6904.75	6041.72	5756.79	1721.26	6234.42	-1.85633	7.91507e-116	1.04529e-111	Niben261Chr03g0012007	Niben261Chr03	1207286	1216772	+	1719	protein_coding	- && sp|P49642|PRI1_HUMAN DNA primase small subunit OS=Homo sapiens OX=9606 GN=PRIM1 PE=1 SV=1 && PF01896:DNA primase small subunit	-
Niben261Chr19g0662011	7698.07	7169.35	7376.33	2671.15	2284.53	2718.03	7414.58	2557.9	1.53544	1.60366e-101	1.58839e-97	Niben261Chr19g0662011	Niben261Chr19	66235810	66238915	+	1284	protein_coding	- && sp|P12859|G3PB_PEA Glyceraldehyde-3-phosphate dehydrogenase B, chloroplastic OS=Pisum sativum OX=3888 GN=GAPB PE=1 SV=2 && PF00044:Glyceraldehyde 3-phosphate dehydrogenase, NAD binding domain|PF02800:Glyceraldehyde 3-phosphate dehydrogenase, C-terminal domain	-
Niben261Chr16g0098010	6298.51	6338.87	5995.01	1782.06	1369.35	1887.02	6210.8	1679.48	1.88664	6.73458e-95	5.33634e-91	Niben261Chr16g0098010	Niben261Chr16	9856714	9857561	-	546	protein_coding	- && sp|A0A0S4IJL0|RBS_NICBE Ribulose bisphosphate carboxylase small subunit, chloroplastic OS=Nicotiana benthamiana OX=4100 GN=rbcS PE=1 SV=1 && PF00101:Ribulose bisphosphate carboxylase, small chain|PF12338:Ribulose-1,5-bisphosphate carboxylase small subunit	-
Niben261Chr17g0037011	1996.14	1724.15	1801.5	565.963	468.796	470.079	1840.6	501.613	1.87613	3.72329e-89	2.45855e-85	Niben261Chr17g0037011	Niben261Chr17	3772015	3774283	+	1266	protein_coding	- && sp|Q9C5W0|DGAT3_ARATH Diacylglycerol O-acyltransferase 3 OS=Arabidopsis thaliana OX=3702 GN=DGAT3 PE=1 SV=2 && -	-
Niben261Chr16g1360009	1782.2	1560.05	1616.7	540.809	471.72	448.059	1652.98	486.863	1.76417	3.67579e-81	2.08044e-77	Niben261Chr16g1360009	Niben261Chr16	135965118	135967058	-	1266	protein_coding	- && sp|Q9C5W0|DGAT3_ARATH Diacylglycerol O-acyltransferase 3 OS=Arabidopsis thaliana OX=3702 GN=DGAT3 PE=1 SV=2 && -	-
Niben261Chr17g1502011	1177.14	1032.27	941.527	3500.26	4149.96	3235.98	1050.31	3628.74	-1.78781	1.14342e-76	5.66263e-73	Niben261Chr17g1502011	Niben261Chr17	150186925	150188564	+	1056	protein_coding	- && sp|P52398|E13K_TOBAC Glucan endo-1,3-beta-glucosidase, acidic isoform GL161 OS=Nicotiana tabacum OX=4097 PE=2 SV=1 && PF00332:Glycosyl hydrolases family 17	Glyco_hydro_17
Niben261Chr03g0190005	1682.3	1566.7	1430.87	3795.34	3804.95	3668.72	1559.96	3756.34	-1.26726	8.7303e-71	3.84318e-67	Niben261Chr03g0190005	Niben261Chr03	19024043	19031084	-	2595	protein_coding	- && sp|P30924|GLGB_SOLTU 1,4-alpha-glucan-branching enzyme OS=Solanum tuberosum OX=4113 GN=SBE1 PE=2 SV=2 && PF00128:Alpha amylase, catalytic domain|PF02806:Alpha amylase, C-terminal all-beta domain|PF02922:Carbohydrate-binding module 48 (Isoamylase N-terminal domain)	-
Niben261Chr06g0766020	4779.25	3768.73	3567.89	1249.96	1183.2	1341.3	4038.62	1258.15	1.6829	1.15738e-68	4.58542e-65	Niben261Chr06g0766020	Niben261Chr06	76627702	76634518	+	1863	protein_coding	- && sp|Q9LV04|PAP14_ARATH Probable plastid-lipid-associated protein 14, chloroplastic OS=Arabidopsis thaliana OX=3702 GN=PAP14 PE=1 SV=1 && -	-
Niben261Chr09g0792008	277.085	237.278	214.734	1178.36	969.755	915.266	243.033	1021.13	-2.06855	9.57385e-65	3.44824e-61	Niben261Chr09g0792008	Niben261Chr09	79254599	79256598	+	936	protein_coding	- && sp|Q9FMG1|MCA3_ARATH Metacaspase-3 OS=Arabidopsis thaliana OX=3702 GN=AMC3 PE=2 SV=1 && PF00656:Caspase domain	Peptidase_C14
Niben261Chr04g1397002	532.494	462.36	481.087	1632.1	1366.43	1417.9	491.98	1472.14	-1.57963	1.40028e-61	4.62314e-58	Niben261Chr04g1397002	Niben261Chr04	139744316	139747096	-	1584	protein_coding	- && sp|Q9ZNR0|C78A6_ARATH Cytochrome P450 78A6 OS=Arabidopsis thaliana OX=3702 GN=CYP78A6 PE=2 SV=1 && PF00067:Cytochrome P450	p450
Niben261Chr13g1365004	879.322	867.063	888.876	2216.45	2408.31	1973.18	878.42	2199.31	-1.32388	3.09362e-56	9.42815e-53	Niben261Chr13g1365004	Niben261Chr13	136568058	136569078	-	804	protein_coding	- && - && -	-
Niben261Chr18g0191012	142.313	108.66	97.0434	591.117	703.681	532.309	116.005	609.036	-2.38695	1.2209e-55	3.45507e-52	Niben261Chr18g0191012	Niben261Chr18	19124550	19127414	-	885	protein_coding	- && sp|P11965|PERX_TOBAC Lignin-forming anionic peroxidase OS=Nicotiana tabacum OX=4097 PE=2 SV=1 && PF00141:Peroxidase	-
Niben261Chr19g0845001	380.757	314.892	309.713	1312.84	1044.8	1506.93	335.121	1288.19	-1.94074	1.34519e-54	3.553e-51	Niben261Chr19g0845001	Niben261Chr19	84551972	84552427	-	456	protein_coding	- && - && -	-
Niben261Chr16g1121001	307.244	322.654	283.903	951.012	1137.39	905.692	304.601	998.031	-1.71261	4.23874e-54	1.04959e-50	Niben261Chr16g1121001	Niben261Chr16	112052382	112053120	+	663	protein_coding	- && sp|P25317|GSTXA_TOBAC Probable glutathione S-transferase parA OS=Nicotiana tabacum OX=4097 GN=PARA PE=2 SV=1 && PF00043:Glutathione S-transferase, C-terminal domain|PF02798:Glutathione S-transferase, N-terminal domain	GST_N
Niben261Chr16g0548008	477.831	498.949	368.558	1814.95	1503.85	1363.32	448.446	1560.71	-1.79941	8.96333e-53	2.08893e-49	Niben261Chr16g0548008	Niben261Chr16	54801529	54802146	+	618	protein_coding	- && - && -	-
Niben261Chr11g1309008	2471.15	2184.29	2148.37	998.417	875.216	987.07	2267.94	953.568	1.25038	1.19726e-51	2.63524e-48	Niben261Chr11g1309008	Niben261Chr11	130890205	130903414	-	1113	protein_coding	- && - && -	-
novel.4027	48.0658	33.2633	68.1368	402.463	407.394	324.556	49.822	378.138	-2.91845	3.15695e-50	6.5829e-47	-	Niben261Chr11	139790606	139792160	+	726	-	- && - && -	-
novel.1071	13.1945	6.65266	3.09713	297.01	280.693	236.476	7.64811	271.393	-5.11693	7.92883e-50	1.57066e-46	-	Niben261Chr03	56636691	56644746	-	8056	-	- && P0C2F6.1 RecName: Full=Putative ribonuclease H protein At1g65750 && -	-
Niben261Chr19g1221006	2683.2	2590.1	2592.3	1364.12	1238.75	1275.24	2621.87	1292.7	1.02036	1.4669e-49	2.76747e-46	Niben261Chr19g1221006	Niben261Chr19	121548175	121548776	-	510	protein_coding	- && sp|P27496|CB25_TOBAC Chlorophyll a-b binding protein 50, chloroplastic OS=Nicotiana tabacum OX=4097 GN=CAB50 PE=2 SV=1 && PF00504:Chlorophyll A-B binding protein	-
novel.379	270.488	301.587	315.907	39.6658	47.7568	27.7643	295.994	38.3956	2.94715	2.69988e-48	4.86212e-45	-	Niben261Chr01	129642891	129644968	-	2078	-	- && - && -	-
Niben261Chr12g0338005	383.584	364.787	438.76	1446.35	1348.88	1031.11	395.71	1275.45	-1.68806	1.62795e-45	2.80425e-42	Niben261Chr12g0338005	Niben261Chr12	33825791	33827452	+	531	protein_coding	- && sp|P05478|HSP16_SOYBN 18.5 kDa class I heat shock protein OS=Glycine max OX=3847 GN=HSP18.5-C PE=3 SV=1 && PF00011:Hsp20/alpha crystallin family	-
Niben261Chr08g0021002	13816.6	13056.9	13502.4	7759.02	7319.45	8046.87	13458.7	7708.45	0.804071	5.00286e-44	8.25868e-41	Niben261Chr08g0021002	Niben261Chr08	2143452	2144078	+	627	protein_coding	- && sp|Q9ZRA4|AB19A_PRUPE Auxin-binding protein ABP19a OS=Prunus persica OX=3760 GN=ABP19A PE=3 SV=1 && PF00190:Cupin	-
Niben261Chr14g0549008	9244.66	9939.07	10286.6	16857	16740.2	17806.5	9823.44	17134.6	-0.802735	1.06163e-41	1.68243e-38	Niben261Chr14g0549008	Niben261Chr14	54954526	54956657	+	1200	protein_coding	- && sp|Q94B38|GPT2_ARATH Glucose-6-phosphate/phosphate translocator 2, chloroplastic OS=Arabidopsis thaliana OX=3702 GN=GPT2 PE=2 SV=2 && PF03151:Triose-phosphate Transporter family	-
Niben261Chr09g1214023	579.617	497.84	468.699	1597.27	1722.17	1237.91	515.385	1519.12	-1.55815	1.96733e-41	2.99784e-38	Niben261Chr09g1214023	Niben261Chr09	121458817	121460722	-	699	protein_coding	- && sp|Q8S8F9|NIC1_ARATH Nicotinamidase 1 OS=Arabidopsis thaliana OX=3702 GN=NIC1 PE=1 SV=1 && PF00857:Isochorismatase family	Isochorismatase
Niben261Chr07g1479010	105.556	62.0915	58.8454	400.528	482.441	383.914	75.4977	422.294	-2.47309	3.1799e-41	4.66609e-38	Niben261Chr07g1479010	Niben261Chr07	147904617	147911538	-	1593	protein_coding	- && sp|Q9SGH6|DOX1_ARATH Alpha-dioxygenase 1 OS=Arabidopsis thaliana OX=3702 GN=DOX1 PE=1 SV=1 && PF03098:Animal haem peroxidase	An_peroxidase
novel.5302	1242.17	1211.89	961.142	2718.56	2844.94	2471.03	1138.4	2678.17	-1.23398	1.37872e-40	1.95084e-37	-	Niben261Chr15	20839567	20842222	+	1632	-	- && P0CH04.1 RecName: Full=Polyubiquitin; Contains: RecName: Full=Ubiquitin; Flags: Precursor >P0CH05.1 RecName: Full=Polyubiquitin; Contains: RecName: Full=Ubiquitin; Flags: Precursor && PF00240:Ubiquitin family	ubiquitin
Niben261Chr14g0031002	19996.3	19188.5	19865	12511.2	12119.5	12127.3	19683.3	12252.6	0.68392	1.61056e-40	2.2003e-37	Niben261Chr14g0031002	Niben261Chr14	3091196	3092026	-	831	protein_coding	- && sp|Q00451|PRF1_SOLLC 36.4 kDa proline-rich protein OS=Solanum lycopersicum OX=4081 GN=TPRP-F1 PE=2 SV=1 && PF14547:Hydrophobic seed protein	-
Niben261Chr06g0608015	295.935	281.629	319.004	845.559	746.565	951.647	298.856	847.923	-1.50411	2.38015e-40	3.1433e-37	Niben261Chr06g0608015	Niben261Chr06	60864588	60865997	+	1086	protein_coding	- && sp|O65039|CYSEP_RICCO Vignain OS=Ricinus communis OX=3988 GN=CYSEP PE=1 SV=1 && PF00112:Papain family cysteine protease|PF08246:Cathepsin propeptide inhibitor domain (I29)	Peptidase_C1
Niben261Chr09g0690024	74.4549	62.0915	44.3922	361.829	343.069	289.132	60.3128	331.343	-2.45276	1.37552e-39	1.75796e-36	Niben261Chr09g0690024	Niben261Chr09	69045361	69046542	-	675	protein_coding	- && sp|Q9FQA3|GST23_MAIZE Glutathione transferase GST 23 OS=Zea mays OX=4577 PE=2 SV=1 && PF02798:Glutathione S-transferase, N-terminal domain	GST_N
Niben261Chr11g1169003	852.933	630.894	689.627	2002.64	1748.48	1721.39	724.484	1824.17	-1.33006	1.46272e-38	1.81098e-35	Niben261Chr11g1169003	Niben261Chr11	116819505	116820227	-	723	protein_coding	- && - && -	-
Niben261Chr06g0681008	830.313	705.182	564.71	1782.06	1793.31	1827.66	700.068	1801.01	-1.36191	2.40522e-38	2.88765e-35	Niben261Chr06g0681008	Niben261Chr06	68027183	68040788	+	5154	protein_coding	- && sp|F4JTS8|NOV_ARATH Protein NO VEIN OS=Arabidopsis thaliana OX=3702 GN=NOV PE=1 SV=1 && -	-
Niben261Chr11g1147019	584.33	555.497	480.055	1356.38	1440.5	1176.63	539.96	1324.5	-1.29382	7.00375e-38	8.16122e-35	Niben261Chr11g1147019	Niben261Chr11	114754778	114756763	-	1410	protein_coding	- && sp|Q9FMX6|DJC76_ARATH Chaperone protein dnaJ C76, chloroplastic OS=Arabidopsis thaliana OX=3702 GN=DJC76 PE=2 SV=1 && PF00226:DnaJ domain|PF13370:4Fe-4S single cluster domain of Ferredoxin I	DnaJ
Niben261Chr08g0159001	254.466	185.166	169.31	632.718	728.047	661.557	202.98	674.107	-1.72688	2.37806e-37	2.6919e-34	Niben261Chr08g0159001	Niben261Chr08	15914980	15915672	-	540	protein_coding	- && - && PF02298:Plastocyanin-like domain	Cu_bind_like
novel.4615	91.4193	75.3968	58.8454	424.714	401.547	304.45	75.2205	376.904	-2.32052	2.70581e-37	2.97782e-34	-	Niben261Chr13	58647302	58649913	+	388	-	- && - && -	-
Niben261Chr19g0203003	32850.6	31320.7	32713.9	20757.8	19441.9	20464.2	32295.1	20221.3	0.675463	8.08042e-37	8.65239e-34	Niben261Chr19g0203003	Niben261Chr19	20286145	20287216	-	798	protein_coding	- && sp|P27494|CB23_TOBAC Chlorophyll a-b binding protein 36, chloroplastic OS=Nicotiana tabacum OX=4097 GN=CAB36 PE=3 SV=1 && PF00504:Chlorophyll A-B binding protein	-
Niben261Chr13g0760001	6704.71	6578.37	6892.14	4091.38	3721.13	4049.76	6725.07	3954.09	0.766212	1.30785e-36	1.36357e-33	Niben261Chr13g0760001	Niben261Chr13	75922033	75922975	+	438	protein_coding	- && sp|Q949Q5|PSAO_ARATH Photosystem I subunit O OS=Arabidopsis thaliana OX=3702 GN=PSAO PE=1 SV=1 && -	-
Niben261Chr14g1384008	358.137	299.37	314.875	760.422	855.723	818.569	324.127	811.572	-1.32161	5.18614e-36	5.26845e-33	Niben261Chr14g1384008	Niben261Chr14	138378155	138380383	+	2229	protein_coding	- && sp|A9QY38|SBT4_LOTJA Subtilisin-like protease 4 OS=Lotus japonicus OX=34305 GN=SBTM4 PE=2 SV=1 && PF02225:PA domain|PF05922:Peptidase inhibitor I9|PF00082:Subtilase family|PF17766:Fibronectin type-III domain	Peptidase_S8
Niben261Chr04g1674008	9944.91	9572.06	9794.15	5125.59	4472.57	5655.31	9770.38	5084.49	0.942304	8.56894e-36	8.28711e-33	Niben261Chr04g1674008	Niben261Chr04	167399536	167401635	-	753	protein_coding	- && sp|P27521|CA4_ARATH Chlorophyll a-b binding protein 4, chloroplastic OS=Arabidopsis thaliana OX=3702 GN=LHCA4 PE=1 SV=1 && PF00504:Chlorophyll A-B binding protein	-
novel.1249	393.951	352.591	319.004	854.266	936.617	841.547	355.182	877.477	-1.30309	8.57597e-36	8.28711e-33	-	Niben261Chr04	26469493	26472691	+	3199	-	- && - && PF13855:Leucine rich repeat	-
novel.3680	912.308	730.683	676.206	1802.37	1723.14	1881.27	773.066	1802.26	-1.21943	1.61519e-35	1.52362e-32	-	Niben261Chr10	11466205	11470043	-	2200	-	- && Q96303.1 RecName: Full=Inorganic phosphate transporter 1-4; Short=AtPht1;4; AltName: Full=H(+)/Pi cotransporter && PF00083:Sugar (and other) transporter	Sugar_tr
Niben261Chr10g1242013	3726.51	3792.01	4185.25	6905.72	6577.76	6668.23	3901.26	6717.24	-0.784011	2.04891e-35	1.88781e-32	Niben261Chr10g1242013	Niben261Chr10	124260756	124265100	-	1677	protein_coding	- && sp|Q00081|GLGL1_SOLTU Glucose-1-phosphate adenylyltransferase large subunit 1 (Fragment) OS=Solanum tuberosum OX=4113 GN=AGPS1 PE=1 SV=1 && PF00483:Nucleotidyl transferase	-
Niben261Chr07g1485002	10224.8	9066.46	8932.12	5436.15	4611.94	4974.6	9407.8	5007.56	0.909877	4.62624e-35	4.16561e-32	Niben261Chr07g1485002	Niben261Chr07	148511205	148516294	-	1035	protein_coding	- && sp|P27141|CAHC_TOBAC Carbonic anhydrase, chloroplastic OS=Nicotiana tabacum OX=4097 PE=2 SV=1 && PF00484:Carbonic anhydrase	-
Niben261Chr01g1565004	32.9863	34.3721	42.3274	205.101	227.088	233.603	36.5619	221.931	-2.60319	1.34507e-34	1.18423e-31	Niben261Chr01g1565004	Niben261Chr01	156521049	156525941	+	1239	protein_coding	- && sp|Q9ZQI7|ALD1_ARATH Aminotransferase ALD1, chloroplastic OS=Arabidopsis thaliana OX=3702 GN=ALD1 PE=1 SV=2 && PF00155:Aminotransferase class I and II	Aminotran_1_2
Niben261Chr09g0038026	7.53974	8.87021	11.3561	148.989	182.255	160.842	9.25536	164.029	-4.15312	1.53766e-34	1.32436e-31	Niben261Chr09g0038026	Niben261Chr09	3864258	3868560	-	444	protein_coding	- && sp|P23137|GRP1_TOBAC Glycine-rich protein OS=Nicotiana tabacum OX=4097 GN=GRP PE=2 SV=1 && PF07172:Glycine rich protein family	-
Niben261Chr12g0770012	21076.4	20970.3	20513.3	11963.6	10181	12380	20853.3	11508.2	0.857601	1.63009e-34	1.3741e-31	Niben261Chr12g0770012	Niben261Chr12	76960248	76960880	+	633	protein_coding	- && sp|Q9ZRA4|AB19A_PRUPE Auxin-binding protein ABP19a OS=Prunus persica OX=3760 GN=ABP19A PE=3 SV=1 && PF00190:Cupin	-
Niben261Chr07g0121006	186.608	172.969	158.986	531.135	557.487	465.292	172.854	517.971	-1.58172	2.00827e-34	1.65762e-31	Niben261Chr07g0121006	Niben261Chr07	12098373	12103696	+	513	protein_coding	- && sp|Q8VY80|FLZ5_ARATH FCS-Like Zinc finger 5 OS=Arabidopsis thaliana OX=3702 GN=FLZ5 PE=1 SV=1 && PF04570:zinc-finger of the FCS-type, C2-C2	-
novel.4262	260.121	246.148	183.763	4.83729	0.974628	2.87217	230.011	2.8947	6.31049	2.16657e-34	1.75178e-31	-	Niben261Chr12	56993257	56997290	+	2664	-	- && - && -	-
Niben261Chr16g0912004	11651.7	11355	11232.3	7437.82	6907.19	7098.1	11413	7147.7	0.675164	2.22445e-34	1.76261e-31	Niben261Chr16g0912004	Niben261Chr16	91148558	91153040	+	1656	protein_coding	- && sp|Q40460|RCA1_TOBAC Ribulose bisphosphate carboxylase/oxygenase activase 1, chloroplastic OS=Nicotiana tabacum OX=4097 PE=1 SV=1 && PF00004:ATPase family associated with various cellular activities (AAA)	AAA
Niben261Chr13g0674004	7978.93	7792.48	8119.64	4184.26	3516.46	4527.5	7963.68	4076.07	0.966226	2.37961e-34	1.84858e-31	Niben261Chr13g0674004	Niben261Chr13	67413218	67415277	-	621	protein_coding	- && sp|Q9SQL2|CB24_PEA Chlorophyll a-b binding protein P4, chloroplastic OS=Pisum sativum OX=3888 GN=lhcA-P4 PE=1 SV=1 && PF00504:Chlorophyll A-B binding protein	-
Niben261Chr03g1791005	1056.51	987.92	980.757	1877.84	1901.5	1807.55	1008.39	1862.3	-0.884309	1.39824e-33	1.06533e-30	Niben261Chr03g1791005	Niben261Chr03	179129659	179134520	+	1584	protein_coding	- && sp|F4J3G5|CTPA3_ARATH Carboxyl-terminal-processing peptidase 3, chloroplastic OS=Arabidopsis thaliana OX=3702 GN=CTPA3 PE=3 SV=1 && PF03572:Peptidase family S41|PF17820:PDZ domain	Peptidase_S41
novel.2414	16.9644	7.76143	12.3885	192.524	192.976	136.907	12.3715	174.136	-3.79333	1.70371e-33	1.27357e-30	-	Niben261Chr06	142076421	142078582	-	2041	-	- && - && -	-
Niben261Chr01g1766001	305.359	252.801	220.929	886.192	868.393	655.813	259.696	803.466	-1.62699	2.61891e-33	1.92146e-30	Niben261Chr01g1766001	Niben261Chr01	176603695	176605395	-	555	protein_coding	- && - && PF06521:PAR1 protein	-
Niben261Chr14g1373007	92.3618	74.288	72.2663	360.862	290.439	326.47	79.6387	325.924	-2.02838	2.67547e-33	1.92727e-30	Niben261Chr14g1373007	Niben261Chr14	137267335	137269310	-	1491	protein_coding	- && sp|Q9FXW4|C80B2_COPJA Probable (S)-N-methylcoclaurine 3'-hydroxylase isozyme 2 OS=Coptis japonica OX=3442 GN=CYP80B2 PE=2 SV=1 && PF00067:Cytochrome P450	p450
Niben261Chr03g0913009	704.023	673.027	489.346	1763.68	1684.16	1430.34	622.132	1626.06	-1.3856	4.46759e-33	3.16074e-30	Niben261Chr03g0913009	Niben261Chr03	91299325	91301311	+	540	protein_coding	- && sp|Q9LQU4|PCR2_ARATH Protein PLANT CADMIUM RESISTANCE 2 OS=Arabidopsis thaliana OX=3702 GN=PCR2 PE=1 SV=1 && PF04749:PLAC8 family	-
Niben261Chr16g0383004	465.579	376.984	293.195	1008.09	1079.89	1083.77	378.586	1057.25	-1.47935	4.71014e-33	3.27388e-30	Niben261Chr16g0383004	Niben261Chr16	38370261	38373097	-	1243	protein_coding	- && sp|Q9FKS8|LHT1_ARATH Lysine histidine transporter 1 OS=Arabidopsis thaliana OX=3702 GN=LHT1 PE=1 SV=1 && PF01490:Transmembrane amino acid transporter protein	Aa_trans
Niben261Chr17g0387001	482.543	416.9	336.555	1002.29	1037	1079.94	411.999	1039.74	-1.33376	5.80055e-33	3.96228e-30	Niben261Chr17g0387001	Niben261Chr17	38688625	38693690	-	1764	protein_coding	- && sp|Q9MAX3|SUT12_ARATH Sulfate transporter 1.2 OS=Arabidopsis thaliana OX=3702 GN=SULTR1;2 PE=1 SV=1 && PF00916:Sulfate permease family	Sulfate_transp
Niben261Chr01g0169015	11250.2	11104.4	11052.6	6984.08	6931.55	7410.21	11135.7	7108.61	0.647563	1.35146e-32	9.07516e-30	Niben261Chr01g0169015	Niben261Chr01	16967975	16973571	-	1848	protein_coding	- && sp|P23509|GLGS_SOLTU Glucose-1-phosphate adenylyltransferase small subunit, chloroplastic/amyloplastic OS=Solanum tuberosum OX=4113 PE=1 SV=2 && PF00483:Nucleotidyl transferase	-
Niben261Chr07g0791001	251.639	221.755	225.058	694.635	654.95	555.287	232.817	634.957	-1.44547	1.45317e-32	9.59549e-30	Niben261Chr07g0791001	Niben261Chr07	79135769	79137683	+	1269	protein_coding	- && sp|Q9FLS0|FB253_ARATH F-box protein At5g07610 OS=Arabidopsis thaliana OX=3702 GN=At5g07610 PE=2 SV=1 && -	-
Niben261Chr17g0017002	556.998	487.861	410.886	1348.64	1516.52	1087.6	485.248	1317.58	-1.43987	4.86577e-32	3.16028e-29	Niben261Chr17g0017002	Niben261Chr17	1699366	1702275	-	2361	protein_coding	- && sp|Q9LP24|Y1571_ARATH Probable leucine-rich repeat receptor-like protein kinase At1g35710 OS=Arabidopsis thaliana OX=3702 GN=At1g35710 PE=1 SV=1 && PF08263:Leucine rich repeat N-terminal domain|PF13855:Leucine rich repeat	LRRNT_2
Niben261Chr06g1088003	24951.8	23828.7	24485.9	16369.4	15248.1	15773	24422.1	15796.8	0.628588	6.3674e-32	4.06887e-29	Niben261Chr06g1088003	Niben261Chr06	108843818	108845270	-	828	protein_coding	- && sp|Q9SQL2|CB24_PEA Chlorophyll a-b binding protein P4, chloroplastic OS=Pisum sativum OX=3888 GN=lhcA-P4 PE=1 SV=1 && PF00504:Chlorophyll A-B binding protein	-
Niben261Chr01g1761005	297.82	251.692	226.09	745.91	846.951	632.835	258.534	741.899	-1.51852	1.04511e-31	6.57239e-29	Niben261Chr01g1761005	Niben261Chr01	176127440	176128328	+	702	protein_coding	- && sp|Q03662|GSTX1_TOBAC Probable glutathione S-transferase OS=Nicotiana tabacum OX=4097 PE=2 SV=1 && PF02798:Glutathione S-transferase, N-terminal domain|PF00043:Glutathione S-transferase, C-terminal domain	GST_N
Niben261Chr09g0303005	364.735	380.31	317.972	830.079	779.702	810.91	354.339	806.897	-1.18773	1.55876e-31	9.64945e-29	Niben261Chr09g0303005	Niben261Chr09	30337547	30341403	-	2022	protein_coding	- && sp|A7KTC5|PHT11_PETHY Low affinity inorganic phosphate transporter 1 OS=Petunia hybrida OX=4102 GN=PT1 PE=2 SV=1 && PF00083:Sugar (and other) transporter	Sugar_tr
Niben261Chr09g0112017	758.686	646.416	630.782	1644.68	1773.82	1348.01	678.628	1588.84	-1.22598	1.75501e-31	1.06972e-28	Niben261Chr09g0112017	Niben261Chr09	11204056	11207578	+	1908	protein_coding	- && sp|Q0GXS4|NFP_MEDTR Serine/threonine receptor-like kinase NFP OS=Medicago truncatula OX=3880 GN=NFP PE=1 SV=1 && PF00069:Protein kinase domain	Pkinase
Niben261Chr14g1184007	2269.46	2070.09	2092.63	3658.93	3584.68	3970.3	2144.06	3737.97	-0.801443	2.18925e-31	1.31418e-28	Niben261Chr14g1184007	Niben261Chr14	118433234	118436922	-	1665	protein_coding	- && sp|P51615|MAOX_VITVI NADP-dependent malic enzyme OS=Vitis vinifera OX=29760 PE=2 SV=1 && PF00390:Malic enzyme, N-terminal domain|PF03949:Malic enzyme, NAD binding domain	Malic_M
Niben261Chr19g1221054	1837.81	1588.88	1588.83	850.396	885.937	798.464	1671.84	844.932	0.985362	5.28625e-31	3.12591e-28	Niben261Chr19g1221054	Niben261Chr19	121499404	121512689	+	552	protein_coding	- && sp|P04783|CB25_PETSP Chlorophyll a-b binding protein 91R, chloroplastic OS=Petunia sp. OX=4104 GN=CAB91R PE=3 SV=1 && -	-
Niben261Chr14g0841005	606.006	525.56	527.544	1141.6	1279.69	1114.4	553.037	1178.56	-1.08993	6.24181e-31	3.63668e-28	Niben261Chr14g0841005	Niben261Chr14	84132506	84138652	-	1974	protein_coding	- && sp|Q9LD40|CNG13_ARATH Putative cyclic nucleotide-gated ion channel 13 OS=Arabidopsis thaliana OX=3702 GN=CNGC13 PE=3 SV=2 && PF00027:Cyclic nucleotide-binding domain|PF00520:Ion transport protein	Ion_trans
Niben261Chr11g0699023	15846.6	15815.6	15436.1	23656.3	23645.4	22964.9	15699.4	23422.2	-0.577157	6.83961e-31	3.92722e-28	Niben261Chr11g0699023	Niben261Chr11	69960546	69967724	-	2568	protein_coding	- && sp|P30924|GLGB_SOLTU 1,4-alpha-glucan-branching enzyme OS=Solanum tuberosum OX=4113 GN=SBE1 PE=2 SV=2 && PF02806:Alpha amylase, C-terminal all-beta domain|PF02922:Carbohydrate-binding module 48 (Isoamylase N-terminal domain)|PF00128:Alpha amylase, catalytic domain	-
Niben261Chr04g0820005	8034.53	7508.63	8005.04	12528.6	11896.3	12437.5	7849.4	12287.5	-0.646392	8.59418e-31	4.86419e-28	Niben261Chr04g0820005	Niben261Chr04	82046776	82050333	+	675	protein_coding	- && sp|P24805|TSJT1_TOBAC Stem-specific protein TSJT1 OS=Nicotiana tabacum OX=4097 GN=TSJT1 PE=2 SV=1 && PF12481:Aluminium induced protein	-
novel.1682	394.894	398.051	397.465	953.914	856.698	813.782	396.803	874.798	-1.14058	8.83044e-31	4.92751e-28	-	Niben261Chr05	32511911	32513429	+	616	-	- && Q43515.1 RecName: Full=Metallothionein-like protein type 2 && PF01439:Metallothionein	-
Niben261Chr10g1024003	641.82	650.852	536.836	1370.89	1460.97	1203.44	609.836	1345.1	-1.14115	1.10152e-30	6.06128e-28	Niben261Chr10g1024003	Niben261Chr10	102468899	102476744	-	1308	protein_coding	- && sp|Q9LJJ7|AATP9_ARATH AAA-ATPase At3g28580 OS=Arabidopsis thaliana OX=3702 GN=At3g28580 PE=2 SV=1 && PF00004:ATPase family associated with various cellular activities (AAA)	AAA
Niben261Chr15g0455002	2457.01	2638.89	2670.76	4723.13	4199.67	4950.67	2588.89	4624.49	-0.837291	1.16106e-30	6.30138e-28	Niben261Chr15g0455002	Niben261Chr15	45566497	45568659	-	1206	protein_coding	- && sp|Q94B38|GPT2_ARATH Glucose-6-phosphate/phosphate translocator 2, chloroplastic OS=Arabidopsis thaliana OX=3702 GN=GPT2 PE=2 SV=2 && PF03151:Triose-phosphate Transporter family	-
Niben261Chr19g0265003	231.847	242.822	224.026	36.7634	53.6045	20.1052	232.898	36.8244	2.66277	1.3558e-30	7.25885e-28	Niben261Chr19g0265003	Niben261Chr19	26547782	26548794	+	420	protein_coding	- && - && PF00112:Papain family cysteine protease	Peptidase_C1
Niben261Chr15g1002003	389.239	358.135	291.13	954.881	908.353	778.359	346.168	880.531	-1.34568	1.66374e-30	8.78876e-28	Niben261Chr15g1002003	Niben261Chr15	100254714	100256889	-	1041	protein_coding	- && sp|Q7XWU3|CADH6_ORYSJ Probable cinnamyl alcohol dehydrogenase 6 OS=Oryza sativa subsp. japonica OX=39947 GN=CAD6 PE=2 SV=2 && PF08240:Alcohol dehydrogenase GroES-like domain|PF00107:Zinc-binding dehydrogenase	ADH_N
Niben261Chr03g0012011	121.578	108.66	128.015	506.948	502.908	335.087	119.418	448.314	-1.90684	4.00445e-30	2.08753e-27	Niben261Chr03g0012011	Niben261Chr03	1123429	1128290	+	1053	protein_coding	- && - && -	-
Niben261Chr04g1775002	39831.5	39164.2	39233.4	22440.2	20083.2	24994.6	39409.7	22506	0.808235	4.75383e-30	2.446e-27	Niben261Chr04g1775002	Niben261Chr04	177443681	177444849	-	798	protein_coding	- && sp|P27494|CB23_TOBAC Chlorophyll a-b binding protein 36, chloroplastic OS=Nicotiana tabacum OX=4097 GN=CAB36 PE=3 SV=1 && PF00504:Chlorophyll A-B binding protein	-
Niben261Chr17g1302001	8.4822	2.21755	9.29139	124.802	149.118	158.927	6.66371	144.282	-4.40795	5.98325e-30	3.03911e-27	Niben261Chr17g1302001	Niben261Chr17	130197255	130201759	-	1371	protein_coding	- && - && PF13962:Domain of unknown function	-
Niben261Chr09g0038002	182.839	232.843	198.216	532.102	715.377	562.946	204.633	603.475	-1.5632	6.80431e-30	3.4124e-27	Niben261Chr09g0038002	Niben261Chr09	3640569	3649611	-	588	protein_coding	- && - && -	-
Niben261Chr17g0714001	130.06	117.53	92.9139	447.933	475.618	335.087	113.502	419.546	-1.88393	8.45706e-30	4.18825e-27	Niben261Chr17g0714001	Niben261Chr17	71419253	71422520	+	1479	protein_coding	- && sp|Q8VZG2|HSR4_ARATH Protein HYPER-SENSITIVITY-RELATED 4 OS=Arabidopsis thaliana OX=3702 GN=HSR4 PE=2 SV=1 && PF14363:Domain associated at C-terminal with AAA|PF00004:ATPase family associated with various cellular activities (AAA)	AAA
Niben261Chr10g0047001	161.162	100.899	90.8491	467.282	412.268	450.931	117.637	443.494	-1.90697	1.12396e-29	5.49755e-27	Niben261Chr10g0047001	Niben261Chr10	4746600	4749133	+	1428	protein_coding	- && sp|Q6VAB2|U71E1_STERE UDP-glycosyltransferase 71E1 OS=Stevia rebaudiana OX=55670 GN=UGT71E1 PE=2 SV=1 && PF00201:UDP-glucoronosyl and UDP-glucosyl transferase	UDPGT
Niben261Chr13g0799005	2291.14	2253.03	2283.62	1339.93	1297.23	1388.22	2275.93	1341.79	0.762325	1.23217e-29	5.95332e-27	Niben261Chr13g0799005	Niben261Chr13	79913163	79914198	-	438	protein_coding	- && sp|Q9SUI7|PSAH1_ARATH Photosystem I reaction center subunit VI-1, chloroplastic OS=Arabidopsis thaliana OX=3702 GN=PSAH1 PE=2 SV=1 && PF03244:Photosystem I reaction centre subunit VI	-
Niben261Chr14g0090022	479.716	488.97	426.371	968.426	927.846	997.601	465.019	964.624	-1.05287	1.60843e-29	7.67764e-27	Niben261Chr14g0090022	Niben261Chr14	9051264	9055699	-	1839	protein_coding	- && sp|Q9M0G0|GAGT3_ARATH Glutathione hydrolase 3 OS=Arabidopsis thaliana OX=3702 GN=GGT3 PE=2 SV=1 && PF01019:Gamma-glutamyltranspeptidase	-
novel.604	3623.79	2736.46	2509.71	12167.7	14527.8	12009.5	2956.65	12901.7	-2.12536	2.21056e-29	1.03197e-26	-	Niben261Chr02	146547448	146550552	+	1325	-	- && P07052.1 RecName: Full=Pathogenesis-related protein R minor form; Short=PR-R; AltName: Full=PROB12; AltName: Full=Thaumatin-like protein E2; Flags: Precursor && -	-
Niben261Chr16g0225008	124.406	129.727	87.752	468.25	420.065	345.618	113.961	411.311	-1.85187	2.21403e-29	1.03197e-26	Niben261Chr16g0225008	Niben261Chr16	22538552	22539736	+	891	protein_coding	- && sp|P12412|CYSEP_VIGMU Vignain OS=Vigna mungo OX=3915 PE=1 SV=1 && PF00112:Papain family cysteine protease|PF08246:Cathepsin propeptide inhibitor domain (I29)	Peptidase_C1
Niben261Chr05g0940001	2834.94	2778.59	2797.74	1742.39	1714.37	1613.2	2803.76	1689.99	0.730496	3.78689e-29	1.74457e-26	Niben261Chr05g0940001	Niben261Chr05	94014074	94019185	-	1605	protein_coding	- && sp|Q9MBA1|CAO_ARATH Chlorophyllide a oxygenase, chloroplastic OS=Arabidopsis thaliana OX=3702 GN=CAO PE=1 SV=1 && PF08417:Pheophorbide a oxygenase|PF00355:Rieske [2Fe-2S] domain	-
Niben261Chr18g0703002	279.913	207.341	161.051	654.969	764.108	643.367	216.102	687.481	-1.66576	4.78543e-29	2.17924e-26	Niben261Chr18g0703002	Niben261Chr18	70351744	70354398	-	1962	protein_coding	- && sp|Q9CAL3|CRK2_ARATH Cysteine-rich receptor-like protein kinase 2 OS=Arabidopsis thaliana OX=3702 GN=CRK2 PE=1 SV=1 && PF00069:Protein kinase domain|PF01657:Salt stress response/antifungal	Pkinase
Niben261Chr18g1356004	102.729	64.309	71.234	297.01	308.957	322.641	79.424	309.536	-1.95332	7.28779e-29	3.28108e-26	Niben261Chr18g1356004	Niben261Chr18	135610048	135611767	-	1029	protein_coding	- && sp|P55088|AQP4_MOUSE Aquaporin-4 OS=Mus musculus OX=10090 GN=Aqp4 PE=1 SV=2 && PF00230:Major intrinsic protein	-
Niben261Chr04g0278001	21942.5	21503.6	21346.4	14747	13390.4	14133	21597.5	14090.1	0.616193	1.03446e-28	4.60499e-26	Niben261Chr04g0278001	Niben261Chr04	27786430	27788529	-	1215	protein_coding	- && sp|Q6SJV8|CRD1_GOSHI Magnesium-protoporphyrin IX monomethyl ester [oxidative] cyclase, chloroplastic OS=Gossypium hirsutum OX=3635 GN=CRD1 PE=2 SV=2 && PF02915:Rubrerythrin	-
Niben261Chr13g1295011	3570.06	3444.97	3184.88	1740.46	1445.37	1923.4	3399.97	1703.08	0.997353	1.56102e-28	6.87177e-26	Niben261Chr13g1295011	Niben261Chr13	129567690	129570195	+	1161	protein_coding	- && sp|Q01289|POR_PEA Protochlorophyllide reductase, chloroplastic OS=Pisum sativum OX=3888 GN=3PCR PE=1 SV=1 && PF00106:short chain dehydrogenase	adh_short
novel.4127	163.047	159.664	174.472	14.5119	27.2896	27.7643	165.727	23.1886	2.83721	1.73037e-28	7.53358e-26	-	Niben261Chr11	88363911	88374044	-	2104	-	- && - && -	-
novel.1018	9687.62	9825.97	9932.49	6654.18	6149.9	6430.8	9815.36	6411.62	0.614313	2.07433e-28	8.93291e-26	-	Niben261Chr03	17305572	17307590	-	2019	-	- && P00299.2 RecName: Full=Plastocyanin A, chloroplastic; Short=PCa; Flags: Precursor && PF00127:Copper binding proteins, plastocyanin/azurin family	-
Niben261Chr15g1524003	758.686	702.964	627.685	1427.97	1327.44	1344.18	696.445	1366.53	-0.97157	2.1898e-28	9.32879e-26	Niben261Chr15g1524003	Niben261Chr15	152480962	152486787	-	3891	protein_coding	- && sp|Q9FWX7|AB11B_ARATH ABC transporter B family member 11 OS=Arabidopsis thaliana OX=3702 GN=ABCB11 PE=2 SV=1 && PF00005:ABC transporter|PF00664:ABC transporter transmembrane region	ABC_membrane
Niben261Chr11g1417001	21532.5	21940.5	20321.3	12285.8	11554.2	13835.3	21264.8	12558.4	0.759785	2.39144e-28	1.00794e-25	Niben261Chr11g1417001	Niben261Chr11	141684144	141689699	-	4170	protein_coding	- && sp|Q9FNB0|CHLH_ARATH Magnesium-chelatase subunit ChlH, chloroplastic OS=Arabidopsis thaliana OX=3702 GN=CHLH PE=1 SV=1 && PF11965:Domain of unknown function (DUF3479)|PF02514:CobN/Magnesium Chelatase	-
Niben261Chr07g1016003	499.507	433.531	387.141	1133.86	1086.71	900.905	440.06	1040.49	-1.2399	3.08094e-28	1.28488e-25	Niben261Chr07g1016003	Niben261Chr07	101617969	101621722	-	2814	protein_coding	- && - && PF14826:FACT complex subunit SPT16 N-terminal lobe domain	-
Niben261Chr02g0729003	750.204	735.119	672.077	1407.65	1291.38	1367.15	719.133	1355.4	-0.914127	3.14638e-28	1.2985e-25	Niben261Chr02g0729003	Niben261Chr02	72971396	72975372	-	1272	protein_coding	- && sp|O22718|ACLA2_ARATH ATP-citrate synthase alpha chain protein 2 OS=Arabidopsis thaliana OX=3702 GN=ACLA-2 PE=2 SV=1 && PF08442:ATP-grasp domain|PF16114:ATP citrate lyase citrate-binding	-
Niben261Chr09g1343008	9327.6	9269.37	8854.69	5745.74	4987.17	5776.9	9150.55	5503.27	0.733551	4.91923e-28	2.00923e-25	Niben261Chr09g1343008	Niben261Chr09	134288469	134292042	+	1233	protein_coding	- && sp|Q944G9|ALFP2_ARATH Fructose-bisphosphate aldolase 2, chloroplastic OS=Arabidopsis thaliana OX=3702 GN=FBA2 PE=1 SV=2 && PF00274:Fructose-bisphosphate aldolase class-I	-
novel.1531	197.918	195.145	187.892	526.297	457.1	494.014	193.652	492.471	-1.34634	6.06078e-28	2.45023e-25	-	Niben261Chr04	72335419	72336503	-	613	-	- && - && -	-
Niben261Chr08g0159007	115.923	90.9196	83.6225	389.886	438.582	290.089	96.8218	372.853	-1.94078	1.55406e-27	6.18714e-25	Niben261Chr08g0159007	Niben261Chr08	15930527	15933423	-	513	protein_coding	- && - && -	-
Niben261Chr01g1079014	13.1945	11.0878	4.1295	135.444	146.194	118.716	9.4706	133.452	-3.80737	1.56166e-27	6.18714e-25	Niben261Chr01g1079014	Niben261Chr01	107895551	107908230	+	2247	protein_coding	- && sp|Q9LW83|CE101_ARATH G-type lectin S-receptor-like serine/threonine-protein kinase CES101 OS=Arabidopsis thaliana OX=3702 GN=CES101 PE=2 SV=2 && PF08276:PAN-like domain|PF01453:D-mannose binding lectin|PF11883:Domain of unknown function (DUF3403)|PF07714:Protein tyrosine kinase	Pkinase_Tyr
Niben261Chr04g0624005	6401.24	6183.64	6133.35	3867.9	4009.62	4179.01	6239.41	4018.84	0.634705	1.89867e-27	7.44785e-25	Niben261Chr04g0624005	Niben261Chr04	62184814	62187560	-	1539	protein_coding	- && sp|P13869|CB12_PETHY Chlorophyll a-b binding protein, chloroplastic OS=Petunia hybrida OX=4102 PE=2 SV=1 && PF00504:Chlorophyll A-B binding protein	-
Niben261Chr08g1295010	21.6767	28.8282	28.9065	171.24	154.966	171.373	26.4705	165.86	-2.65481	2.09624e-27	8.14224e-25	Niben261Chr08g1295010	Niben261Chr08	129478861	129481812	+	765	protein_coding	- && sp|Q8L7A0|TAUE3_ARATH Sulfite exporter TauE/SafE family protein 3 OS=Arabidopsis thaliana OX=3702 GN=At2g25737 PE=2 SV=1 && PF01925:Sulfite exporter TauE/SafE	-
Niben261Chr07g0597001	1660.63	1570.03	1450.49	878.452	777.753	839.632	1560.38	831.946	0.907621	2.18589e-27	8.40805e-25	Niben261Chr07g0597001	Niben261Chr07	59698813	59712759	+	1566	protein_coding	- && sp|Q9SNV9|NRAM3_ARATH Metal transporter Nramp3 OS=Arabidopsis thaliana OX=3702 GN=NRAMP3 PE=1 SV=2 && PF01566:Natural resistance-associated macrophage protein	-
Niben261Chr03g0179005	512.702	459.033	481.087	1009.06	955.135	927.712	484.274	963.969	-0.991742	2.92648e-27	1.11485e-24	Niben261Chr03g0179005	Niben261Chr03	17918403	17922866	+	1224	protein_coding	- && sp|Q8LFG1|AMY2_ARATH Probable alpha-amylase 2 OS=Arabidopsis thaliana OX=3702 GN=AMY2 PE=2 SV=1 && PF00128:Alpha amylase, catalytic domain|PF07821:Alpha-amylase C-terminal beta-sheet domain	-
Niben261Chr01g0460004	909.481	878.151	771.185	1605.98	1559.4	1557.68	852.939	1574.35	-0.883818	3.26644e-27	1.2325e-24	Niben261Chr01g0460004	Niben261Chr01	46057335	46062734	-	4494	protein_coding	- && sp|Q9LK64|AB3C_ARATH ABC transporter C family member 3 OS=Arabidopsis thaliana OX=3702 GN=ABCC3 PE=1 SV=1 && PF00664:ABC transporter transmembrane region|PF00005:ABC transporter	ABC_tran
Niben261Chr06g1107031	1898.13	1887.14	1764.33	3334.83	3550.57	2961.21	1849.87	3282.2	-0.827137	3.34892e-27	1.2517e-24	Niben261Chr06g1107031	Niben261Chr06	110684590	110686616	-	876	protein_coding	- && sp|Q9KG32|Y283_BACHD Uncharacterized isomerase BH0283 OS=Bacillus halodurans (strain ATCC BAA-125 / DSM 18197 / FERM 7344 / JCM 9153 / C-125) OX=272558 GN=BH0283 PE=3 SV=1 && PF02567:Phenazine biosynthesis-like protein	-
Niben261Chr15g0656002	23262.9	22464.9	23400.9	13631.5	11895.3	14803.2	23042.9	13443.3	0.777429	4.01685e-27	1.48333e-24	Niben261Chr15g0656002	Niben261Chr15	65592828	65594820	+	738	protein_coding	- && sp|P12360|CB11_SOLLC Chlorophyll a-b binding protein 6A, chloroplastic OS=Solanum lycopersicum OX=4081 GN=CAB6A PE=2 SV=1 && PF00504:Chlorophyll A-B binding protein	-
Niben261Chr17g0868004	7965.73	7525.26	8336.44	12567.3	12797.8	11901.3	7942.48	12422.1	-0.645145	4.0435e-27	1.48333e-24	Niben261Chr17g0868004	Niben261Chr17	86786534	86791846	+	699	protein_coding	- && sp|P24805|TSJT1_TOBAC Stem-specific protein TSJT1 OS=Nicotiana tabacum OX=4097 GN=TSJT1 PE=2 SV=1 && PF12481:Aluminium induced protein	-
Niben261Chr13g0055007	4706.68	3698.88	3613.32	17999.6	20721.6	14241.2	4006.29	17654.1	-2.13957	4.6565e-27	1.69253e-24	Niben261Chr13g0055007	Niben261Chr13	5460834	5461316	+	483	protein_coding	- && sp|P08299|PR1A_TOBAC Pathogenesis-related protein 1A OS=Nicotiana tabacum OX=4097 PE=1 SV=1 && PF00188:Cysteine-rich secretory protein family	SCP
Niben261Chr11g1211008	512.702	481.209	508.961	223.483	183.23	163.714	500.957	190.142	1.39828	6.31427e-27	2.27423e-24	Niben261Chr11g1211008	Niben261Chr11	121163634	121164164	+	531	protein_coding	- && sp|Q9ZQ80|NDRP1_ARATH Nodulin-related protein 1 OS=Arabidopsis thaliana OX=3702 GN=NRP1 PE=1 SV=1 && -	-
Niben261Chr09g0688005	635.223	551.062	461.472	1218.03	1213.41	1139.3	549.252	1190.25	-1.1142	7.12077e-27	2.53481e-24	Niben261Chr09g0688005	Niben261Chr09	68863102	68869133	-	1344	protein_coding	- && sp|P38025|PUR7_ARATH Phosphoribosylaminoimidazole-succinocarboxamide synthase, chloroplastic OS=Arabidopsis thaliana OX=3702 GN=PUR7 PE=2 SV=2 && PF02798:Glutathione S-transferase, N-terminal domain|PF01259:SAICAR synthetase	GST_N
novel.6900	285.567	252.801	267.385	82.234	65.3001	78.5061	268.585	75.3467	1.83452	7.16571e-27	2.53481e-24	-	Niben261Chr19	46230852	46245499	-	686	-	- && - && -	-
Niben261Chr08g0385003	328.921	345.938	297.324	772.032	912.252	678.79	324.061	787.691	-1.28168	8.43755e-27	2.95829e-24	Niben261Chr08g0385003	Niben261Chr08	38522269	38536622	-	768	protein_coding	- && sp|Q9FLV0|DMR6_ARATH Protein DOWNY MILDEW RESISTANCE 6 OS=Arabidopsis thaliana OX=3702 GN=DMR6 PE=1 SV=1 && PF03171:2OG-Fe(II) oxygenase superfamily|PF14226:non-haem dioxygenase in morphine synthesis N-terminal	2OG-FeII_Oxy
Niben261Chr10g0038002	469.349	396.942	501.735	942.304	936.617	1062.7	456.008	980.542	-1.10303	1.03768e-26	3.60629e-24	Niben261Chr10g0038002	Niben261Chr10	3870312	3871799	+	423	protein_coding	- && sp|P23137|GRP1_TOBAC Glycine-rich protein OS=Nicotiana tabacum OX=4097 GN=GRP PE=2 SV=1 && PF07172:Glycine rich protein family	-
Niben261Chr16g0928015	17594	17132.8	17556.6	25500.3	24706.8	26011.4	17427.8	25406.1	-0.543761	1.33838e-26	4.61089e-24	Niben261Chr16g0928015	Niben261Chr16	92768775	92769879	-	222	protein_coding	- && sp|Q40396|MT2_NICGU Metallothionein-like protein type 2 OS=Nicotiana glutinosa OX=35889 PE=3 SV=1 && -	-
Niben261Chr19g1221005	1454.23	1275.09	1200.65	583.377	483.415	671.131	1309.99	579.308	1.17743	1.36339e-26	4.65656e-24	Niben261Chr19g1221005	Niben261Chr19	121547630	121548151	-	522	protein_coding	- && sp|P12331|CB22_ORYSJ Chlorophyll a-b binding protein 2, chloroplastic OS=Oryza sativa subsp. japonica OX=39947 GN=CAB2R PE=2 SV=2 && PF00504:Chlorophyll A-B binding protein	-
Niben261Chr07g1178010	10185.2	8104.04	7490.92	25225.5	27557.6	24154	8593.4	25645.7	-1.57734	1.50707e-26	5.1033e-24	Niben261Chr07g1178010	Niben261Chr07	117809327	117810641	+	762	protein_coding	- && sp|P17514|CHIQ_TOBAC Acidic endochitinase Q OS=Nicotiana tabacum OX=4097 PE=1 SV=1 && PF00182:Chitinase class I	-
Niben261Chr08g0176004	29420	28410.2	28111.6	19427.5	17887.3	19531.7	28647.3	18948.9	0.596301	1.88227e-26	6.31981e-24	Niben261Chr08g0176004	Niben261Chr08	17647295	17648609	-	834	protein_coding	- && sp|Q9SQL2|CB24_PEA Chlorophyll a-b binding protein P4, chloroplastic OS=Pisum sativum OX=3888 GN=lhcA-P4 PE=1 SV=1 && PF00504:Chlorophyll A-B binding protein	-
Niben261Chr07g1245029	132408	129159	129182	74945.1	66335.1	84704.2	130250	75328.2	0.790019	2.62857e-26	8.75137e-24	Niben261Chr07g1245029	Niben261Chr07	124430713	124447543	+	2706	protein_coding	- && sp|P27493|CB22_TOBAC Chlorophyll a-b binding protein 21, chloroplastic OS=Nicotiana tabacum OX=4097 GN=CAB21 PE=2 SV=1 && PF00504:Chlorophyll A-B binding protein	-
Niben261Chr16g0954007	102.729	125.292	105.302	400.528	390.826	298.706	111.108	363.353	-1.71244	2.73886e-26	9.04256e-24	Niben261Chr16g0954007	Niben261Chr16	95453879	95455666	+	378	protein_coding	- && - && PF09713:Plant protein 1589 of unknown function (A_thal_3526)	-
Niben261Chr04g0243021	4505.93	3229.86	3103.32	16123.7	17394.2	13927.2	3613.04	15815	-2.12987	3.14497e-26	1.02976e-23	Niben261Chr04g0243021	Niben261Chr04	24261748	24263102	+	1029	protein_coding	- && sp|P23547|E13G_TOBAC Glucan endo-1,3-beta-glucosidase, acidic isoform GI9 OS=Nicotiana tabacum OX=4097 GN=PR2 PE=1 SV=1 && PF00332:Glycosyl hydrolases family 17	Glyco_hydro_17
Niben261Chr13g1288013	37782.6	36330.2	38391	24934.3	21616.3	24379	37501.2	23643.2	0.66552	3.53997e-26	1.14959e-23	Niben261Chr13g1288013	Niben261Chr13	128818169	128819965	+	714	protein_coding	- && sp|P27489|CB23_SOLLC Chlorophyll a-b binding protein 13, chloroplastic OS=Solanum lycopersicum OX=4081 GN=CAB13 PE=1 SV=1 && PF00504:Chlorophyll A-B binding protein	-
Niben261Chr04g0242009	65.9727	41.0247	65.0397	239.93	382.054	243.177	57.3457	288.387	-2.32308	3.5781e-26	1.15253e-23	Niben261Chr04g0242009	Niben261Chr04	24220963	24222606	-	999	protein_coding	- && sp|P23433|E13D_TOBAC Glucan endo-1,3-beta-glucosidase OS=Nicotiana tabacum OX=4097 GN=SP41B PE=1 SV=1 && PF00332:Glycosyl hydrolases family 17	Glyco_hydro_17
Niben261Chr14g0000003	155.507	96.4635	130.079	409.235	433.709	370.51	127.35	404.485	-1.66018	3.80388e-26	1.21537e-23	Niben261Chr14g0000003	Niben261Chr14	66503	69584	-	1845	protein_coding	- && sp|Q9ZV48|TPS11_ARATH Probable alpha,alpha-trehalose-phosphate synthase [UDP-forming] 11 OS=Arabidopsis thaliana OX=3702 GN=TPS11 PE=2 SV=1 && PF00982:Glycosyltransferase family 20	-
Niben261Chr04g1207005	7993.06	7638.36	7767.6	5278.45	4967.68	5243.63	7799.67	5163.25	0.59522	4.72936e-26	1.49898e-23	Niben261Chr04g1207005	Niben261Chr04	120746823	120747452	+	630	protein_coding	- && sp|P27522|CB13_SOLLC Chlorophyll a-b binding protein 8, chloroplastic OS=Solanum lycopersicum OX=4081 GN=CAB8 PE=3 SV=1 && PF00504:Chlorophyll A-B binding protein	-
Niben261Scf00054g0000006	330.806	256.127	211.637	704.31	888.86	680.705	266.19	757.958	-1.50673	5.097e-26	1.60268e-23	Niben261Scf00054g0000006	Niben261Scf00054	559	2158	+	627	protein_coding	- && sp|P09762|WIN2_SOLTU Wound-induced protein WIN2 OS=Solanum tuberosum OX=4113 GN=WIN2 PE=2 SV=1 && PF00187:Chitin recognition protein|PF00967:Barwin family	-
Niben261Chr01g0723006	992.418	928.046	929.139	1846.88	1892.73	1577.78	949.867	1772.46	-0.899337	5.7973e-26	1.80853e-23	Niben261Chr01g0723006	Niben261Chr01	72343859	72347224	-	2751	protein_coding	- && - && PF14826:FACT complex subunit SPT16 N-terminal lobe domain	-
Niben261Chr14g0594009	14064.4	13824.2	14075.4	9056.38	8372.05	9566.25	13988	8998.23	0.636475	6.98366e-26	2.16161e-23	Niben261Chr14g0594009	Niben261Chr14	59387595	59389808	+	651	protein_coding	- && sp|P12360|CB11_SOLLC Chlorophyll a-b binding protein 6A, chloroplastic OS=Solanum lycopersicum OX=4081 GN=CAB6A PE=2 SV=1 && PF00504:Chlorophyll A-B binding protein	-
Niben261Chr05g0566012	23217.7	23383	22097	13544.4	12816.4	15395.8	22899.2	13918.9	0.718238	9.59624e-26	2.94724e-23	Niben261Chr05g0566012	Niben261Chr05	56644331	56650577	+	4236	protein_coding	- && sp|Q9FNB0|CHLH_ARATH Magnesium-chelatase subunit ChlH, chloroplastic OS=Arabidopsis thaliana OX=3702 GN=CHLH PE=1 SV=1 && PF02514:CobN/Magnesium Chelatase|PF11965:Domain of unknown function (DUF3479)	-
Niben261Chr10g0607028	15031.4	14713.5	15149.1	8040.55	7310.68	9612.21	14964.7	8321.14	0.846686	1.19443e-25	3.64018e-23	Niben261Chr10g0607028	Niben261Chr10	60689681	60692196	+	966	protein_coding	- && sp|P27524|CB4A_SOLLC Chlorophyll a-b binding protein CP24 10A, chloroplastic OS=Solanum lycopersicum OX=4081 GN=CAP10A PE=3 SV=1 && PF00504:Chlorophyll A-B binding protein	-
Niben261Chr06g0500009	14194.5	13631.3	13579.9	9426.91	8204.42	8206.76	13801.9	8612.7	0.680372	1.22506e-25	3.705e-23	Niben261Chr06g0500009	Niben261Chr06	50062228	50062854	-	627	protein_coding	- && sp|Q9ZRA4|AB19A_PRUPE Auxin-binding protein ABP19a OS=Prunus persica OX=3760 GN=ABP19A PE=3 SV=1 && PF00190:Cupin	-
Niben261Chr07g1213011	9768.67	9301.52	9996.5	6510.03	5881.88	6335.06	9688.9	6242.32	0.634305	1.26924e-25	3.80956e-23	Niben261Chr07g1213011	Niben261Chr07	121325752	121326662	-	675	protein_coding	- && sp|P46486|PSAF_FLATR Photosystem I reaction center subunit III, chloroplastic OS=Flaveria trinervia OX=4227 GN=PSAF PE=2 SV=1 && PF02507:Photosystem I reaction centre subunit III	-
Niben261Chr01g1256009	213.94	199.58	225.058	532.102	548.715	467.207	212.859	516.008	-1.27642	1.89075e-25	5.63229e-23	Niben261Chr01g1256009	Niben261Chr01	125638333	125642271	-	2796	protein_coding	- && sp|Q9SZA7|DRL29_ARATH Probable disease resistance protein At4g33300 OS=Arabidopsis thaliana OX=3702 GN=At4g33300 PE=2 SV=3 && PF00931:NB-ARC domain	NB-ARC
Niben261Chr09g1066003	2729.38	2685.46	2908.2	1649.52	1692.93	1768.3	2774.35	1703.58	0.703593	1.92123e-25	5.68038e-23	Niben261Chr09g1066003	Niben261Chr09	106662070	106664516	-	1239	protein_coding	- && sp|O04496|AED3_ARATH Aspartyl protease AED3 OS=Arabidopsis thaliana OX=3702 GN=AED3 PE=1 SV=1 && PF14541:Xylanase inhibitor C-terminal|PF14543:Xylanase inhibitor N-terminal	-
Niben261Chr05g1348008	52.7781	49.8949	41.295	229.288	326.5	185.734	47.9894	247.174	-2.36302	2.45018e-25	7.19065e-23	Niben261Chr05g1348008	Niben261Chr05	134775653	134776755	+	327	protein_coding	- && - && PF14368:Probable lipid transfer	-
Niben261Chr07g1129012	1438.2	1485.76	1447.39	836.851	713.427	837.717	1457.12	795.999	0.871955	3.09159e-25	9.0063e-23	Niben261Chr07g1129012	Niben261Chr07	112899234	112902479	+	621	protein_coding	- && sp|Q8LFP9|ABA4_ARATH Protein ABA DEFICIENT 4, chloroplastic OS=Arabidopsis thaliana OX=3702 GN=ABA4 PE=2 SV=1 && PF14108:Domain of unknown function (DUF4281)	-
Niben261Chr17g0759010	9168.32	9066.46	8748.36	4863.41	3904.36	5421.71	8994.38	4729.83	0.9272	3.77541e-25	1.09181e-22	Niben261Chr17g0759010	Niben261Chr17	75910285	75919082	-	1620	protein_coding	- && sp|P27491|CB27_TOBAC Chlorophyll a-b binding protein 7, chloroplastic OS=Nicotiana tabacum OX=4097 GN=CAB7 PE=3 SV=1 && PF00504:Chlorophyll A-B binding protein	-
Niben261Chr07g0427003	3.76987	2.21755	6.19426	112.225	143.27	113.93	4.06056	123.142	-4.91192	5.02614e-25	1.44298e-22	Niben261Chr07g0427003	Niben261Chr07	42732696	42737016	-	594	protein_coding	- && sp|Q5HZ38|GRIK2_ARATH Serine/threonine-protein kinase GRIK2 OS=Arabidopsis thaliana OX=3702 GN=GRIK2 PE=1 SV=1 && PF00069:Protein kinase domain	Pkinase
Niben261Chr16g0225013	122.521	135.271	111.497	365.699	444.43	324.556	123.096	378.228	-1.62071	5.08537e-25	1.44948e-22	Niben261Chr16g0225013	Niben261Chr16	22494308	22496170	+	1194	protein_coding	- && sp|O49523|DSEL_ARATH Phospholipase A1-IIgamma OS=Arabidopsis thaliana OX=3702 GN=DSEL PE=1 SV=1 && PF01764:Lipase (class 3)	Lipase_3
novel.2932	130.06	167.425	129.047	21.2841	17.5433	21.0626	142.178	19.9633	2.82968	5.41104e-25	1.52374e-22	-	Niben261Chr08	123898230	123901736	+	3507	-	- && - && -	-
novel.3814	729.469	701.855	690.66	1394.11	1319.65	1202.48	707.328	1305.41	-0.883572	5.42283e-25	1.52374e-22	-	Niben261Chr10	109393799	109397036	-	2712	-	- && Q9LUZ4.1 RecName: Full=Zinc finger CCCH domain-containing protein 66; Short=AtC3H66 && PF00642:Zinc finger C-x8-C-x5-C-x3-H type (and similar)	zf-CCCH
Niben261Chr11g0101003	6845.14	6640.46	6719.74	4600.26	4417.99	4599.31	6735.11	4539.19	0.569337	5.51468e-25	1.53863e-22	Niben261Chr11g0101003	Niben261Chr11	10135605	10138164	-	1170	protein_coding	- && sp|Q01289|POR_PEA Protochlorophyllide reductase, chloroplastic OS=Pisum sativum OX=3888 GN=3PCR PE=1 SV=1 && PF00106:short chain dehydrogenase	adh_short
Niben261Chr17g0569055	15844.8	16041.8	15656	8604.57	6959.82	9717.52	15847.5	8427.3	0.91108	9.60371e-25	2.66076e-22	Niben261Chr17g0569055	Niben261Chr17	56909582	56917833	+	837	protein_coding	- && sp|P27496|CB25_TOBAC Chlorophyll a-b binding protein 50, chloroplastic OS=Nicotiana tabacum OX=4097 GN=CAB50 PE=2 SV=1 && PF00504:Chlorophyll A-B binding protein	-
Niben261Chr17g0802003	14009.8	13122.4	13019.3	8572.65	8391.54	9241.7	13383.8	8735.3	0.615622	1.07029e-24	2.94471e-22	Niben261Chr17g0802003	Niben261Chr17	80254454	80258575	-	1911	protein_coding	- && sp|O78328|DXS_CAPAN Probable 1-deoxy-D-xylulose-5-phosphate synthase, chloroplastic OS=Capsicum annuum OX=4072 GN=TKT2 PE=2 SV=1 && PF13292:1-deoxy-D-xylulose-5-phosphate synthase|PF02779:Transketolase, pyrimidine binding domain|PF02780:Transketolase, C-terminal domain	-
Niben261Chr14g1378001	455.212	393.616	316.939	930.695	822.586	940.158	388.589	897.813	-1.20654	1.16339e-24	3.17879e-22	Niben261Chr14g1378001	Niben261Chr14	137811750	137817445	-	2424	protein_coding	- && sp|P93733|PLDB1_ARATH Phospholipase D beta 1 OS=Arabidopsis thaliana OX=3702 GN=PLDBETA1 PE=1 SV=4 && PF13091:PLD-like domain|PF12357:Phospholipase D C terminal|PF00168:C2 domain|PF00614:Phospholipase D Active site motif	C2
Niben261Chr19g0531005	1128.13	1125.41	1004.5	1846.88	1825.48	1880.32	1086.01	1850.89	-0.769108	1.19642e-24	3.24665e-22	Niben261Chr19g0531005	Niben261Chr19	53097103	53102000	+	1989	protein_coding	- && sp|Q9T074|PCKA1_ARATH Phosphoenolpyruvate carboxykinase (ATP) 1 OS=Arabidopsis thaliana OX=3702 GN=PCK1 PE=1 SV=1 && PF01293:Phosphoenolpyruvate carboxykinase	-
Niben261Chr18g0040011	767.168	687.441	678.271	1437.64	1418.08	1220.67	710.96	1358.8	-0.933378	1.47976e-24	3.98822e-22	Niben261Chr18g0040011	Niben261Chr18	4037275	4040202	-	1506	protein_coding	- && sp|Q56WF8|SCP48_ARATH Serine carboxypeptidase-like 48 OS=Arabidopsis thaliana OX=3702 GN=SCPL48 PE=2 SV=2 && PF00450:Serine carboxypeptidase	Peptidase_S10
Niben261Chr17g0005019	732.297	646.416	574.001	1605.01	1675.39	1200.57	650.905	1493.66	-1.19738	1.67849e-24	4.49325e-22	Niben261Chr17g0005019	Niben261Chr17	555930	558890	+	2961	protein_coding	- && sp|Q40235|CF9_SOLPI Receptor-like protein Cf-9 OS=Solanum pimpinellifolium OX=4084 GN=CF-9 PE=1 SV=1 && PF13855:Leucine rich repeat	-
novel.6901	387.354	400.268	331.393	98.6808	113.057	150.31	373.005	120.683	1.62726	2.98526e-24	7.93779e-22	-	Niben261Chr19	46235072	46238343	-	3165	-	- && P47098.3 RecName: Full=Transposon Ty1-JR1 Gag-Pol polyprotein; AltName: Full=Gag-Pol-p199; AltName: Full=TY1A-TY1B; AltName: Full=Transposon Ty1 TYA-TYB polyprotein; AltName: Full=p190; Contains: RecName: Full=Capsid protein; Short=CA; AltName: Full=Gag-p45; AltName: Full=p54; Contains: RecName: Full=Ty1 protease; Short=PR; AltName: Full=Pol-p20; AltName: Full=p23; Contains: RecName: Full=In…	-
Niben261Chr18g1479036	1595.6	1672.03	1637.35	882.322	733.895	956.434	1634.99	857.55	0.930599	3.33355e-24	8.8048e-22	Niben261Chr18g1479036	Niben261Chr18	147927196	147929316	-	423	protein_coding	- && sp|P93092|ACP1_CASGL Acyl carrier protein 1, chloroplastic OS=Casuarina glauca OX=3522 GN=ACP1 PE=2 SV=1 && PF00550:Phosphopantetheine attachment site	PP-binding
Niben261Chr12g0838009	7504.86	7204.83	7299.93	5044.33	4834.15	4529.42	7336.54	4802.63	0.611385	3.416e-24	8.96281e-22	Niben261Chr12g0838009	Niben261Chr12	83367856	83370157	-	807	protein_coding	- && sp|Q7DM39|PSBP1_TOBAC Oxygen-evolving enhancer protein 2-1, chloroplastic OS=Nicotiana tabacum OX=4097 GN=PSBP1 PE=3 SV=2 && PF01789:PsbP	-
Niben261Chr16g0884010	350.598	348.156	258.094	713.017	806.017	707.512	318.949	742.182	-1.21807	3.69818e-24	9.63935e-22	Niben261Chr16g0884010	Niben261Chr16	88259949	88260710	+	672	protein_coding	- && sp|Q03664|GSTX3_TOBAC Probable glutathione S-transferase OS=Nicotiana tabacum OX=4097 PE=2 SV=1 && PF02798:Glutathione S-transferase, N-terminal domain|PF00043:Glutathione S-transferase, C-terminal domain	GST_N
Niben261Chr11g0348018	57292.6	54393.2	57513.7	37699.9	35110	39421.5	56399.8	37410.5	0.592257	3.83232e-24	9.92371e-22	Niben261Chr11g0348018	Niben261Chr11	34834256	34835326	+	798	protein_coding	- && sp|P12062|CB26_PETSP Chlorophyll a-b binding protein 37, chloroplastic OS=Petunia sp. OX=4104 GN=CAB37 PE=3 SV=1 && PF00504:Chlorophyll A-B binding protein	-
Niben261Chr03g0021009	938.697	893.674	881.649	1640.81	1735.81	1477.25	904.673	1617.96	-0.838172	3.8629e-24	9.93794e-22	Niben261Chr03g0021009	Niben261Chr03	2158062	2161063	-	1008	protein_coding	- && sp|C6TAQ0|NRPB_SOYBN DCD domain-containing protein NRP-B OS=Glycine max OX=3847 GN=NRP-B PE=2 SV=1 && PF10539:Development and cell death domain	-
Niben261Chr12g0373010	45639	44550.6	44614.1	28983.1	26443.6	31166.9	44934.6	28864.5	0.638527	6.36435e-24	1.62677e-21	Niben261Chr12g0373010	Niben261Chr12	37332836	37335082	-	855	protein_coding	- && sp|Q07473|CB4A_ARATH Chlorophyll a-b binding protein CP29.1, chloroplastic OS=Arabidopsis thaliana OX=3702 GN=LHCB4.1 PE=1 SV=1 && PF00504:Chlorophyll A-B binding protein	-
Niben261Chr07g1087016	378.872	392.507	412.95	875.55	725.123	902.82	394.776	834.498	-1.08045	6.48745e-24	1.6476e-21	Niben261Chr07g1087016	Niben261Chr07	108688648	108689564	+	516	protein_coding	- && - && PF00257:Dehydrin	-
Niben261Chr13g0907007	168.702	148.576	124.918	446.966	594.523	376.255	147.398	472.581	-1.67878	7.88645e-24	1.99015e-21	Niben261Chr13g0907007	Niben261Chr13	90607759	90614338	-	1506	protein_coding	- && sp|Q8VWZ7|C76B6_CATRO Geraniol 8-hydroxylase OS=Catharanthus roseus OX=4058 GN=CYP76B6 PE=1 SV=1 && PF00067:Cytochrome P450	p450
Niben261Chr16g0580002	438.247	384.745	368.558	777.837	807.966	808.038	397.184	797.947	-1.00467	8.42889e-24	2.11357e-21	Niben261Chr16g0580002	Niben261Chr16	58016730	58029762	-	2640	protein_coding	- && sp|P0C5E2|LRL12_ARATH LEAF RUST 10 DISEASE-RESISTANCE LOCUS RECEPTOR-LIKE PROTEIN KINASE-like 1.2 OS=Arabidopsis thaliana OX=3702 GN=LRK10L-1.2 PE=2 SV=3 && PF00069:Protein kinase domain|PF14380:Wall-associated receptor kinase C-terminal	Pkinase
Niben261Chr06g0229002	743.606	684.115	688.595	314.424	298.236	373.382	705.439	328.681	1.10214	1.0006e-23	2.49326e-21	Niben261Chr06g0229002	Niben261Chr06	22887744	22893114	+	1308	protein_coding	- && sp|Q5SR56|MF14B_HUMAN Hippocampus abundant transcript-like protein 1 OS=Homo sapiens OX=9606 GN=MFSD14B PE=1 SV=3 && PF07690:Major Facilitator Superfamily	MFS_1
Niben261Chr17g0569089	30797	29783.9	30617.2	20147.3	17398.1	20376.2	30399.4	19307.2	0.654908	1.03835e-23	2.57115e-21	Niben261Chr17g0569089	Niben261Chr17	56702393	56703193	-	801	protein_coding	- && sp|P27495|CB24_TOBAC Chlorophyll a-b binding protein 40, chloroplastic OS=Nicotiana tabacum OX=4097 GN=CAB40 PE=2 SV=1 && PF00504:Chlorophyll A-B binding protein	-
Niben261Chr19g0152003	9291.78	8928.97	9177.82	6387.16	6245.41	5934.87	9132.86	6189.15	0.561419	1.32098e-23	3.25068e-21	Niben261Chr19g0152003	Niben261Chr19	15162626	15164904	-	807	protein_coding	- && sp|Q7DM39|PSBP1_TOBAC Oxygen-evolving enhancer protein 2-1, chloroplastic OS=Nicotiana tabacum OX=4097 GN=PSBP1 PE=3 SV=2 && PF01789:PsbP	-
Niben261Chr14g1381017	211.113	160.773	118.723	545.647	528.248	438.485	163.536	504.127	-1.62019	1.52481e-23	3.7291e-21	Niben261Chr14g1381017	Niben261Chr14	138166810	138168222	-	1389	protein_coding	- && sp|A9QY38|SBT4_LOTJA Subtilisin-like protease 4 OS=Lotus japonicus OX=34305 GN=SBTM4 PE=2 SV=1 && PF17766:Fibronectin type-III domain|PF02225:PA domain|PF00082:Subtilase family	Peptidase_S8
Niben261Chr01g1651002	494.795	516.69	436.695	975.198	883.013	965.05	482.727	941.087	-0.963584	1.6189e-23	3.93493e-21	Niben261Chr01g1651002	Niben261Chr01	165103269	165115705	-	1896	protein_coding	- && sp|Q9FFT4|PDC2_ARATH Pyruvate decarboxylase 2 OS=Arabidopsis thaliana OX=3702 GN=PDC2 PE=2 SV=1 && PF02775:Thiamine pyrophosphate enzyme, C-terminal TPP binding domain|PF02776:Thiamine pyrophosphate enzyme, N-terminal TPP binding domain|PF00205:Thiamine pyrophosphate enzyme, central domain	TPP_enzyme_N
Niben261Chr09g0082011	186.608	195.145	154.856	402.463	546.766	497.843	178.87	482.357	-1.43159	1.67416e-23	4.04442e-21	Niben261Chr09g0082011	Niben261Chr09	8238894	8241410	+	2517	protein_coding	- && sp|O48837|LRKS2_ARATH Receptor like protein kinase S.2 OS=Arabidopsis thaliana OX=3702 GN=LECRKS2 PE=2 SV=2 && PF07714:Protein tyrosine kinase|PF00069:Protein kinase domain	Pkinase
Niben261Chr09g0804006	15701.5	14957.4	15288.5	8839.67	7257.08	9708.9	15315.8	8601.88	0.832293	1.70813e-23	4.10147e-21	Niben261Chr09g0804006	Niben261Chr09	80446051	80447047	-	771	protein_coding	- && sp|P27524|CB4A_SOLLC Chlorophyll a-b binding protein CP24 10A, chloroplastic OS=Solanum lycopersicum OX=4081 GN=CAP10A PE=3 SV=1 && PF00504:Chlorophyll A-B binding protein	-
Niben261Chr17g0827002	1870.8	1815.07	1860.34	2899.47	2836.17	2817.6	1848.74	2851.08	-0.624747	1.79246e-23	4.27804e-21	Niben261Chr17g0827002	Niben261Chr17	82719551	82733366	-	3690	protein_coding	- && sp|Q42910|PPDK_MESCR Pyruvate, phosphate dikinase, chloroplastic OS=Mesembryanthemum crystallinum OX=3544 GN=PPD PE=2 SV=1 && PF00391:PEP-utilising enzyme, mobile domain|PF01326:Pyruvate phosphate dikinase, PEP/pyruvate binding domain|PF02896:PEP-utilising enzyme, TIM barrel domain	-
Niben261Chr18g1180006	8358.74	8415.61	7982.33	5450.66	4939.41	5606.48	8252.23	5332.19	0.630017	1.94723e-23	4.61961e-21	Niben261Chr18g1180006	Niben261Chr18	118019366	118022255	+	1629	protein_coding	- && sp|P93111|HEM11_CUCSA Glutamyl-tRNA reductase 1, chloroplastic OS=Cucumis sativus OX=3659 GN=HEMA1 PE=2 SV=1 && PF05201:Glutamyl-tRNAGlu reductase, N-terminal domain|PF00745:Glutamyl-tRNAGlu reductase, dimerisation domain|PF01488:Shikimate / quinate 5-dehydrogenase	-
Niben261Chr07g1004009	1429.72	1242.94	1384.42	3065.88	3175.34	2231.68	1352.36	2824.3	-1.06187	2.83919e-23	6.66406e-21	Niben261Chr07g1004009	Niben261Chr07	100390595	100391473	-	879	protein_coding	- && - && PF05903:PPPDE putative peptidase domain	-
Niben261Chr07g1484001	1834.98	1781.8	1732.33	1112.58	999.968	1081.85	1783.04	1064.8	0.74388	2.84264e-23	6.66406e-21	Niben261Chr07g1484001	Niben261Chr07	148307632	148310389	+	1170	protein_coding	- && sp|Q9SSA5|CYP38_ARATH Peptidyl-prolyl cis-trans isomerase CYP38, chloroplastic OS=Arabidopsis thaliana OX=3702 GN=CYP38 PE=1 SV=1 && PF00160:Cyclophilin type peptidyl-prolyl cis-trans isomerase/CLD	Pro_isomerase
Niben261Chr17g0252012	5745.28	5713.52	5640.9	3903.69	3894.61	3941.58	5699.9	3913.3	0.542569	3.17762e-23	7.40555e-21	Niben261Chr17g0252012	Niben261Chr17	25253136	25255702	-	438	protein_coding	- && sp|Q9SUI6|PSAH2_ARATH Photosystem I reaction center subunit VI-2, chloroplastic OS=Arabidopsis thaliana OX=3702 GN=PSAH2 PE=2 SV=1 && PF03244:Photosystem I reaction centre subunit VI	-
Niben261Chr19g0944003	263.891	294.934	236.414	711.082	785.55	539.011	265.08	678.548	-1.35692	4.48545e-23	1.03923e-20	Niben261Chr19g0944003	Niben261Chr19	94384551	94387688	+	1392	protein_coding	- && sp|O48676|U74B1_ARATH UDP-glycosyltransferase 74B1 OS=Arabidopsis thaliana OX=3702 GN=UGT74B1 PE=1 SV=1 && PF00201:UDP-glucoronosyl and UDP-glucosyl transferase	UDPGT
Niben261Chr12g0665003	1962.22	2015.75	1834.53	3351.28	3521.33	2956.42	1937.5	3276.34	-0.757943	4.58813e-23	1.05684e-20	Niben261Chr12g0665003	Niben261Chr12	66435316	66450174	+	1032	protein_coding	- && sp|Q03666|GSTX4_TOBAC Probable glutathione S-transferase OS=Nicotiana tabacum OX=4097 PE=2 SV=1 && PF02798:Glutathione S-transferase, N-terminal domain|PF13410:Glutathione S-transferase, C-terminal domain	GST_N
Niben261Chr05g0266003	4100.67	3690.01	3382.06	6175.29	6139.18	5920.51	3724.25	6078.32	-0.706377	4.6929e-23	1.07473e-20	Niben261Chr05g0266003	Niben261Chr05	26629149	26635503	+	1533	protein_coding	- && sp|Q03411|SUT_SPIOL Sucrose transport protein OS=Spinacia oleracea OX=3562 PE=2 SV=1 && PF13347:MFS/sugar transport protein	-
Niben261Chr14g1114006	802.039	916.958	881.649	1597.27	1431.73	1696.5	866.882	1575.17	-0.86275	5.73833e-23	1.30659e-20	Niben261Chr14g1114006	Niben261Chr14	111390186	111392647	-	972	protein_coding	- && sp|Q08298|RD22_ARATH BURP domain protein RD22 OS=Arabidopsis thaliana OX=3702 GN=RD22 PE=2 SV=1 && PF03181:BURP domain	-
Niben261Chr19g0530002	5032.77	5132.52	4994.64	3402.55	3109.06	3429.37	5053.31	3313.66	0.608706	6.91373e-23	1.56523e-20	Niben261Chr19g0530002	Niben261Chr19	52941385	52944249	-	1629	protein_coding	- && sp|P93111|HEM11_CUCSA Glutamyl-tRNA reductase 1, chloroplastic OS=Cucumis sativus OX=3659 GN=HEMA1 PE=2 SV=1 && PF00745:Glutamyl-tRNAGlu reductase, dimerisation domain|PF01488:Shikimate / quinate 5-dehydrogenase|PF05201:Glutamyl-tRNAGlu reductase, N-terminal domain	-
Niben261Chr09g0167005	10507.6	8986.63	7564.22	16074.3	16691.5	16453.7	9019.47	16406.5	-0.863008	8.90897e-23	2.00548e-20	Niben261Chr09g0167005	Niben261Chr09	16706057	16713930	+	4125	protein_coding	- && sp|Q949G3|PDR1_NICPL Pleiotropic drug resistance protein 1 OS=Nicotiana plumbaginifolia OX=4092 GN=PDR1 PE=1 SV=1 && PF00005:ABC transporter|PF08370:Plant PDR ABC transporter associated|PF01061:ABC-2 type transporter	ABC2_membrane
novel.5876	188.493	240.604	206.475	505.013	509.73	469.122	211.858	494.622	-1.22679	9.63835e-23	2.15741e-20	-	Niben261Chr16	16107205	16110328	-	1565	-	- && O49725.2 RecName: Full=Probable purine permease 10; Short=AtPUP10 && -	-
Niben261Chr17g0890004	581.502	502.276	390.238	1015.83	1127.64	1102.91	491.339	1082.13	-1.13765	1.10465e-22	2.45871e-20	Niben261Chr17g0890004	Niben261Chr17	89033194	89040424	-	1572	protein_coding	- && sp|Q94AZ2|STP13_ARATH Sugar transport protein 13 OS=Arabidopsis thaliana OX=3702 GN=STP13 PE=1 SV=2 && PF00083:Sugar (and other) transporter	Sugar_tr
Niben261Chr13g0060013	229.019	157.446	126.982	470.185	555.538	514.119	171.149	513.281	-1.57948	1.25183e-22	2.77073e-20	Niben261Chr13g0060013	Niben261Chr13	5989805	5994775	-	387	protein_coding	- && sp|P08299|PR1A_TOBAC Pathogenesis-related protein 1A OS=Nicotiana tabacum OX=4097 PE=1 SV=1 && PF00188:Cysteine-rich secretory protein family	SCP
Niben261Chr16g1050001	320.439	272.759	365.461	719.789	757.286	647.196	319.553	708.09	-1.14623	1.4399e-22	3.1693e-20	Niben261Chr16g1050001	Niben261Chr16	104960978	104961682	-	639	protein_coding	- && sp|Q9SRN0|NHL1_ARATH NDR1/HIN1-like protein 1 OS=Arabidopsis thaliana OX=3702 GN=NHL1 PE=2 SV=1 && PF03168:Late embryogenesis abundant protein	-
Niben261Chr09g0804004	32381.3	31967.1	31654.7	18854.8	16151.5	21225.4	32001	18743.9	0.771689	1.62828e-22	3.56414e-20	Niben261Chr09g0804004	Niben261Chr09	80351017	80351991	-	774	protein_coding	- && sp|P27524|CB4A_SOLLC Chlorophyll a-b binding protein CP24 10A, chloroplastic OS=Solanum lycopersicum OX=4081 GN=CAP10A PE=3 SV=1 && PF00504:Chlorophyll A-B binding protein	-
Niben261Chr15g0922003	2555.97	2469.24	2363.11	4285.84	4590.5	3704.15	2462.77	4193.49	-0.767681	1.76006e-22	3.83142e-20	Niben261Chr15g0922003	Niben261Chr15	92209482	92216143	+	1335	protein_coding	- && sp|O04153|CALR3_ARATH Calreticulin-3 OS=Arabidopsis thaliana OX=3702 GN=CRT3 PE=1 SV=2 && PF00262:Calreticulin family	-
Niben261Chr18g0117008	720.045	770.599	810.415	397.625	369.384	407.849	767.02	391.619	0.969114	2.12866e-22	4.60849e-20	Niben261Chr18g0117008	Niben261Chr18	11671812	11673632	+	459	protein_coding	- && sp|A0A3G5BB24|NBS_NARPS Norbelladine synthase OS=Narcissus pseudonarcissus OX=39639 GN=NBS PE=1 SV=1 && PF00407:Pathogenesis-related protein Bet v I family	-
Niben261Chr04g1850007	263.891	237.278	185.828	528.232	544.817	555.287	228.999	542.779	-1.24323	2.52475e-22	5.43632e-20	Niben261Chr04g1850007	Niben261Chr04	184984617	185004177	-	3285	protein_coding	- && sp|Q9LW83|CE101_ARATH G-type lectin S-receptor-like serine/threonine-protein kinase CES101 OS=Arabidopsis thaliana OX=3702 GN=CES101 PE=2 SV=2 && PF01453:D-mannose binding lectin|PF08276:PAN-like domain|PF00069:Protein kinase domain	Pkinase
Niben261Chr16g0832003	44550.4	42916.3	44072.1	26116.5	24106.4	30231.5	43846.3	26818.2	0.709243	2.64782e-22	5.67048e-20	Niben261Chr16g0832003	Niben261Chr16	83203173	83205557	-	855	protein_coding	- && sp|Q07473|CB4A_ARATH Chlorophyll a-b binding protein CP29.1, chloroplastic OS=Arabidopsis thaliana OX=3702 GN=LHCB4.1 PE=1 SV=1 && PF00504:Chlorophyll A-B binding protein	-
novel.2417	1585.23	1604.4	1686.9	921.02	945.389	1030.15	1625.51	965.521	0.751331	2.76446e-22	5.88845e-20	-	Niben261Chr06	145781943	145785821	-	2318	-	- && Q9M0B6.1 RecName: Full=UDP-glucuronate 4-epimerase 1; AltName: Full=UDP-glucuronic acid epimerase 1; Short=AtUGlcAE3 && PF01370:NAD dependent epimerase/dehydratase family	Epimerase
Niben261Chr04g1798005	3246.8	3288.63	3350.06	2134.21	1938.53	2200.08	3295.16	2090.94	0.65607	2.83823e-22	6.01326e-20	Niben261Chr04g1798005	Niben261Chr04	179791318	179791686	-	369	protein_coding	- && - && PF06596:Photosystem II reaction centre X protein (PsbX)	-
Niben261Chr03g1540014	566.423	536.648	551.289	1067.11	958.059	984.198	551.453	1003.12	-0.862561	3.23951e-22	6.82692e-20	Niben261Chr03g1540014	Niben261Chr03	153988686	154002018	-	1485	protein_coding	- && sp|P49043|VPE_CITSI Vacuolar-processing enzyme OS=Citrus sinensis OX=2711 PE=2 SV=1 && PF01650:Peptidase C13 family	-
Niben261Chr06g0397019	973.568	838.235	662.786	3094.9	3160.72	2492.09	824.863	2915.9	-1.82136	3.25719e-22	6.82787e-20	Niben261Chr06g0397019	Niben261Chr06	39687341	39692030	+	456	protein_coding	- && sp|Q9LJ86|LTPG5_ARATH Non-specific lipid transfer protein GPI-anchored 5 OS=Arabidopsis thaliana OX=3702 GN=LTPG5 PE=2 SV=1 && PF14368:Probable lipid transfer	-
Niben261Chr02g1483008	549.458	504.493	463.537	982.938	1097.43	908.564	505.829	996.311	-0.976855	4.13391e-22	8.62007e-20	Niben261Chr02g1483008	Niben261Chr02	148336137	148339112	-	1401	protein_coding	- && - && PF07712:Stress up-regulated Nod 19	-
Niben261Chr10g0479016	7607.59	7423.26	7512.6	4833.42	4301.03	5142.15	7514.48	4758.87	0.65905	5.47348e-22	1.13536e-19	Niben261Chr10g0479016	Niben261Chr10	47875021	47878411	+	1152	protein_coding	- && sp|Q944G9|ALFP2_ARATH Fructose-bisphosphate aldolase 2, chloroplastic OS=Arabidopsis thaliana OX=3702 GN=FBA2 PE=1 SV=2 && PF00274:Fructose-bisphosphate aldolase class-I	-
Niben261Chr06g1194007	1317.57	1248.48	1173.81	2048.11	2656.84	2218.27	1246.62	2307.74	-0.888098	6.23358e-22	1.28629e-19	Niben261Chr06g1194007	Niben261Chr06	119439757	119456653	+	2799	protein_coding	- && sp|O04979|LONP2_SPIOL Lon protease homolog 2, peroxisomal OS=Spinacia oleracea OX=3562 PE=2 SV=2 && PF05362:Lon protease (S16) C-terminal proteolytic domain|PF02190:ATP-dependent protease La (LON) substrate-binding domain|PF00004:ATPase family associated with various cellular activities (AAA)	AAA
Niben261Chr15g1423009	871.782	776.143	690.66	1445.38	1453.17	1370.98	779.528	1423.18	-0.867302	7.11333e-22	1.46022e-19	Niben261Chr15g1423009	Niben261Chr15	142312336	142316620	-	1104	protein_coding	- && sp|Q39023|MPK3_ARATH Mitogen-activated protein kinase 3 OS=Arabidopsis thaliana OX=3702 GN=MPK3 PE=1 SV=2 && PF00069:Protein kinase domain	Pkinase
Niben261Chr03g0434003	27024.3	25733.6	26625	18246.3	15278.3	17347	26461	16957.2	0.641985	7.40666e-22	1.5126e-19	Niben261Chr03g0434003	Niben261Chr03	43409538	43413314	-	1152	protein_coding	- && sp|Q9SDT1|POR_DAUCA Protochlorophyllide reductase, chloroplastic OS=Daucus carota OX=4039 GN=POR1 PE=2 SV=1 && PF00106:short chain dehydrogenase	adh_short
Niben261Chr03g0668002	410.916	418.009	422.242	825.242	778.728	755.382	417.055	786.45	-0.915329	7.44511e-22	1.51265e-19	Niben261Chr03g0668002	Niben261Chr03	66860950	66864534	+	1302	protein_coding	- && sp|Q6DBP4|PAE8_ARATH Pectin acetylesterase 8 OS=Arabidopsis thaliana OX=3702 GN=PAE8 PE=2 SV=1 && PF03283:Pectinacetylesterase	-
Niben261Chr11g0759004	67.8576	49.8949	35.1008	202.199	243.657	201.052	50.9511	215.636	-2.07393	8.44754e-22	1.70757e-19	Niben261Chr11g0759004	Niben261Chr11	75940739	75944057	+	2604	protein_coding	- && sp|O81832|Y4729_ARATH G-type lectin S-receptor-like serine/threonine-protein kinase At4g27290 OS=Arabidopsis thaliana OX=3702 GN=At4g27290 PE=3 SV=4 && PF11883:Domain of unknown function (DUF3403)|PF00954:S-locus glycoprotein domain|PF01453:D-mannose binding lectin|PF08276:PAN-like domain|PF07714:Protein tyrosine kinase	Pkinase_Tyr
Niben261Chr11g1411011	166.817	185.166	230.22	560.158	516.553	426.996	194.067	501.236	-1.37024	1.11977e-21	2.25199e-19	Niben261Chr11g1411011	Niben261Chr11	141143206	141147506	+	909	protein_coding	- && sp|P93758|RMR42_ARATH Remorin 4.2 OS=Arabidopsis thaliana OX=3702 GN=REM4.2 PE=1 SV=1 && PF03763:Remorin, C-terminal region	-
Niben261Chr12g0119003	2519.21	2797.44	2492.16	1523.75	1359.61	1653.41	2602.94	1512.26	0.782995	1.14759e-21	2.29628e-19	Niben261Chr12g0119003	Niben261Chr12	11981449	11984310	+	660	protein_coding	- && - && PF10674:Protein of unknown function (DUF2488)	-
novel.503	88555.1	90672.4	87430.9	55638.5	48158.3	60679.4	88886.1	54825.4	0.697106	1.21574e-21	2.42041e-19	-	Niben261Chr02	53218853	53220036	+	1184	-	- && P27496.1 RecName: Full=Chlorophyll a-b binding protein 50, chloroplastic; AltName: Full=LHCII type I CAB-50; Short=LHCP; Flags: Precursor && -	-
Niben261Chr15g1439011	9738.51	9397.99	9094.2	6700.62	6297.07	6221.13	9410.23	6406.27	0.55482	1.22398e-21	2.42465e-19	Niben261Chr15g1439011	Niben261Chr15	143922771	143927038	+	1413	protein_coding	- && sp|Q9STF2|PTA16_ARATH Protein PLASTID TRANSCRIPTIONALLY ACTIVE 16, chloroplastic OS=Arabidopsis thaliana OX=3702 GN=PTAC16 PE=1 SV=1 && PF13460:NAD(P)H-binding	-
novel.4270	31682.9	30971.4	31380.1	20285.7	17427.3	21406.3	31344.8	19706.4	0.669557	1.37493e-21	2.71012e-19	-	Niben261Chr12	62266480	62267727	+	1044	-	- && P27489.1 RecName: Full=Chlorophyll a-b binding protein 13, chloroplastic; AltName: Full=LHCII type III CAB-13; Flags: Precursor && -	-
Niben261Chr19g1470004	81.0522	102.007	91.8815	297.01	308.957	241.263	91.647	282.41	-1.62745	1.46849e-21	2.8802e-19	Niben261Chr19g1470004	Niben261Chr19	147002964	147008135	+	2394	protein_coding	- && sp|O81832|Y4729_ARATH G-type lectin S-receptor-like serine/threonine-protein kinase At4g27290 OS=Arabidopsis thaliana OX=3702 GN=At4g27290 PE=3 SV=4 && PF00069:Protein kinase domain|PF01453:D-mannose binding lectin|PF00954:S-locus glycoprotein domain|PF08276:PAN-like domain	B_lectin
Niben261Chr02g1338012	3570.06	3428.34	3392.39	2182.59	1948.28	2310.18	3463.6	2147.02	0.689987	1.59058e-21	3.10429e-19	Niben261Chr02g1338012	Niben261Chr02	133881206	133884265	-	1284	protein_coding	- && sp|P12859|G3PB_PEA Glyceraldehyde-3-phosphate dehydrogenase B, chloroplastic OS=Pisum sativum OX=3888 GN=GAPB PE=1 SV=2 && PF02800:Glyceraldehyde 3-phosphate dehydrogenase, C-terminal domain|PF00044:Glyceraldehyde 3-phosphate dehydrogenase, NAD binding domain	-
Niben261Chr06g0164016	255.409	247.257	181.698	529.2	569.183	518.906	228.121	539.096	-1.23993	1.76437e-21	3.42659e-19	Niben261Chr06g0164016	Niben261Chr06	16458713	16467477	-	1818	protein_coding	- && sp|Q7XUK4|GUN12_ORYSJ Endoglucanase 12 OS=Oryza sativa subsp. japonica OX=39947 GN=GLU3 PE=2 SV=2 && PF00759:Glycosyl hydrolase family 9	-
Niben261Chr07g0469010	620.143	716.269	644.203	1276.08	1307.95	1099.08	660.205	1227.7	-0.896158	1.98974e-21	3.84545e-19	Niben261Chr07g0469010	Niben261Chr07	46907034	46910144	-	1092	protein_coding	- && sp|O04397|FENR2_TOBAC Ferredoxin--NADP reductase, root-type isozyme, chloroplastic OS=Nicotiana tabacum OX=4097 PE=2 SV=1 && PF00175:Oxidoreductase NAD-binding domain	NAD_binding_1
Niben261Chr17g1112002	409.973	426.879	310.745	899.736	965.856	743.893	382.532	869.828	-1.18525	2.1321e-21	4.10056e-19	Niben261Chr17g1112002	Niben261Chr17	111261411	111265438	+	576	protein_coding	- && sp|Q8L3R2|CML41_ARATH Probable calcium-binding protein CML41 OS=Arabidopsis thaliana OX=3702 GN=CML41 PE=2 SV=2 && PF13833:EF-hand domain pair|PF13499:EF-hand domain pair	-
Niben261Chr06g0095047	941.524	859.301	769.12	1543.1	1441.47	1628.52	856.649	1537.7	-0.843228	2.20475e-21	4.21981e-19	Niben261Chr06g0095047	Niben261Chr06	9353419	9373983	+	2739	protein_coding	- && sp|Q9ZRF1|MTDH_FRAAN Probable mannitol dehydrogenase OS=Fragaria ananassa OX=3747 GN=CAD PE=2 SV=1 && PF00107:Zinc-binding dehydrogenase|PF08240:Alcohol dehydrogenase GroES-like domain	ADH_N
Niben261Chr02g0458003	136.658	120.857	116.659	337.643	329.424	311.152	124.724	326.073	-1.384	2.66916e-21	5.0841e-19	Niben261Chr02g0458003	Niben261Chr02	45840962	45849420	-	1410	protein_coding	- && sp|H2DH21|C7A29_PANGI Cytochrome P450 CYP72A219 OS=Panax ginseng OX=4054 PE=2 SV=1 && PF00067:Cytochrome P450	p450
Niben261Chr19g1337008	324.209	309.349	227.123	654.002	657.874	626.134	286.893	646.003	-1.17014	2.91401e-21	5.52394e-19	Niben261Chr19g1337008	Niben261Chr19	133719612	133722045	+	1647	protein_coding	- && sp|Q40577|5EAS_TOBAC 5-epi-aristolochene synthase OS=Nicotiana tabacum OX=4097 GN=EAS3 PE=1 SV=3 && PF01397:Terpene synthase, N-terminal domain|PF03936:Terpene synthase family, metal binding domain	-
novel.295	757.743	729.575	751.57	1375.73	1346.94	1190.99	746.296	1304.55	-0.805292	2.9334e-21	5.53422e-19	-	Niben261Chr01	58772013	58774575	-	2126	-	- && - && -	-
Niben261Chr03g0403008	182.839	121.965	108.399	18.3817	20.4672	22.02	137.734	20.2896	2.76607	3.03609e-21	5.7008e-19	Niben261Chr03g0403008	Niben261Chr03	40294991	40313711	+	885	protein_coding	- && sp|Q9M2E2|SDR1_ARATH (+)-neomenthol dehydrogenase OS=Arabidopsis thaliana OX=3702 GN=SDR1 PE=1 SV=1 && PF00106:short chain dehydrogenase	adh_short
Niben261Chr07g0941010	17811.7	16852.3	17148.8	11985.8	11336.9	12417.4	17270.9	11913.4	0.535808	3.05989e-21	5.71839e-19	Niben261Chr07g0941010	Niben261Chr07	94166342	94168273	+	999	protein_coding	- && sp|Q40459|PSBO_TOBAC Oxygen-evolving enhancer protein 1, chloroplastic OS=Nicotiana tabacum OX=4097 GN=PSBO PE=2 SV=1 && PF01716:Manganese-stabilising protein / photosystem II polypeptide	-
Niben261Chr11g1020007	1690.79	1493.52	1368.93	2497.01	2545.73	2668.25	1517.75	2570.33	-0.759279	3.52555e-21	6.55769e-19	Niben261Chr11g1020007	Niben261Chr11	101990176	101999879	+	1071	protein_coding	- && sp|Q03411|SUT_SPIOL Sucrose transport protein OS=Spinacia oleracea OX=3562 PE=2 SV=1 && -	-
Niben261Chr10g0262012	50306.1	49326.1	49984.6	32232.8	28362.6	34759	49872.2	31784.8	0.649896	3.6813e-21	6.8154e-19	Niben261Chr10g0262012	Niben261Chr10	26196105	26196908	-	804	protein_coding	- && sp|P27496|CB25_TOBAC Chlorophyll a-b binding protein 50, chloroplastic OS=Nicotiana tabacum OX=4097 GN=CAB50 PE=2 SV=1 && PF00504:Chlorophyll A-B binding protein	-
Niben261Chr17g0620012	31.1014	19.958	25.8094	134.477	182.255	127.333	25.6229	148.022	-2.52014	3.80583e-21	7.01318e-19	Niben261Chr17g0620012	Niben261Chr17	62013920	62016146	-	1338	protein_coding	- && sp|Q58VT1|PUN1_CAPFR Acyltransferase Pun1 OS=Capsicum frutescens OX=4073 GN=PUN1 PE=3 SV=1 && PF02458:Transferase family	-
Niben261Chr07g0477002	68.8001	44.351	44.3922	282.498	224.164	178.075	52.5144	228.246	-2.11128	4.08218e-21	7.48759e-19	Niben261Chr07g0477002	Niben261Chr07	47764281	47766046	+	786	protein_coding	- && sp|Q4JL76|MYBA2_ORYSJ Myb-related protein MYBAS2 OS=Oryza sativa subsp. japonica OX=39947 GN=MYBAS2 PE=2 SV=1 && PF00249:Myb-like DNA-binding domain	Myb_DNA-binding
Niben261Chr07g0481001	2234.59	2780.81	2443.63	1273.18	1047.72	1456.19	2486.34	1259.03	0.981125	6.30403e-21	1.15096e-18	Niben261Chr07g0481001	Niben261Chr07	48015090	48015758	+	456	protein_coding	- && sp|P19177|H2A_PETCR Histone H2A OS=Petroselinum crispum OX=4043 PE=2 SV=1 && PF00125:Core histone H2A/H2B/H3/H4|PF16211:C-terminus of histone H2A	Histone
Niben261Chr15g1190002	223.365	204.015	176.536	473.087	540.918	429.869	201.305	481.291	-1.25585	7.93351e-21	1.44182e-18	Niben261Chr15g1190002	Niben261Chr15	119070422	119071782	+	993	protein_coding	- && sp|O22176|WRK15_ARATH Probable WRKY transcription factor 15 OS=Arabidopsis thaliana OX=3702 GN=WRKY15 PE=2 SV=1 && PF03106:WRKY DNA -binding domain|PF10533:Plant zinc cluster domain	WRKY
Niben261Chr13g0838020	48622.8	44643.8	46097.7	31455.9	29150.1	33024.2	46454.7	31210.1	0.573834	8.00008e-21	1.44728e-18	Niben261Chr13g0838020	Niben261Chr13	83779949	83782275	-	720	protein_coding	- && sp|Q9XF89|CB5_ARATH Chlorophyll a-b binding protein CP26, chloroplastic OS=Arabidopsis thaliana OX=3702 GN=LHCB5 PE=1 SV=1 && PF00504:Chlorophyll A-B binding protein	-
Niben261Chr01g1638006	229.019	194.036	155.889	442.128	516.553	476.781	192.981	478.487	-1.30731	8.27149e-21	1.48958e-18	Niben261Chr01g1638006	Niben261Chr01	163872463	163877325	-	1737	protein_coding	- && sp|P26792|INV1_DAUCA Beta-fructofuranosidase, insoluble isoenzyme 1 OS=Daucus carota OX=4039 GN=INV1 PE=1 SV=1 && PF08244:Glycosyl hydrolases family 32 C terminal|PF00251:Glycosyl hydrolases family 32 N-terminal domain	-
Niben261Chr16g0914003	309.129	298.261	280.806	663.676	835.256	573.477	296.065	690.803	-1.22174	9.77061e-21	1.75159e-18	Niben261Chr16g0914003	Niben261Chr16	91418599	91420599	+	2001	protein_coding	- && sp|O80939|LRK41_ARATH L-type lectin-domain containing receptor kinase IV.1 OS=Arabidopsis thaliana OX=3702 GN=LECRK41 PE=2 SV=1 && PF00069:Protein kinase domain|PF00139:Legume lectin domain	Pkinase
Niben261Chr16g0486001	720.045	615.371	595.681	1226.74	1208.54	1102.91	643.699	1179.4	-0.871955	1.10208e-20	1.96682e-18	Niben261Chr16g0486001	Niben261Chr16	48573640	48576475	+	2643	protein_coding	- && sp|Q9SCZ4|FERON_ARATH Receptor-like protein kinase FERONIA OS=Arabidopsis thaliana OX=3702 GN=FER PE=1 SV=1 && PF07714:Protein tyrosine kinase|PF12819:Malectin-like domain	Pkinase_Tyr
Niben261Scf12034g0000002	1296.83	957.983	878.552	5077.22	5239.6	3699.36	1044.46	4672.06	-2.16097	1.15859e-20	2.05839e-18	Niben261Scf12034g0000002	Niben261Scf12034	2	361	+	360	protein_coding	- && sp|P23547|E13G_TOBAC Glucan endo-1,3-beta-glucosidase, acidic isoform GI9 OS=Nicotiana tabacum OX=4097 GN=PR2 PE=1 SV=1 && PF00332:Glycosyl hydrolases family 17	Glyco_hydro_17
Niben261Chr15g0894002	888.746	786.122	838.289	1592.44	1486.31	1342.26	837.719	1473.67	-0.813805	1.31661e-20	2.32869e-18	Niben261Chr15g0894002	Niben261Chr15	89368167	89369328	+	978	protein_coding	- && sp|Q9LVB8|CXE20_ARATH Probable carboxylesterase 120 OS=Arabidopsis thaliana OX=3702 GN=CXE20 PE=2 SV=1 && PF07859:alpha/beta hydrolase fold	Abhydrolase_3
Niben261Chr14g1496009	102.729	87.5933	75.3635	372.471	246.581	272.856	88.5619	297.303	-1.74435	1.58647e-20	2.79353e-18	Niben261Chr14g1496009	Niben261Chr14	149578433	149579283	+	477	protein_coding	- && - && -	-
Niben261Chr04g0376002	8513.3	8905.69	8959.99	5473.88	4826.36	6034.44	8793	5444.89	0.691357	1.83537e-20	3.2175e-18	Niben261Chr04g0376002	Niben261Chr04	37595270	37596727	-	393	protein_coding	- && sp|Q9SUI5|PSAK_ARATH Photosystem I reaction center subunit psaK, chloroplastic OS=Arabidopsis thaliana OX=3702 GN=PSAK PE=2 SV=2 && PF01241:Photosystem I psaG / psaK	-
Niben261Chr14g1156001	3628.5	3709.96	3503.88	2388.65	2155.88	2454.75	3614.12	2333.09	0.631267	1.96509e-20	3.42973e-18	Niben261Chr14g1156001	Niben261Chr14	115496355	115515947	+	1293	protein_coding	- && sp|Q9SFH9|HEM21_ARATH Delta-aminolevulinic acid dehydratase 1, chloroplastic OS=Arabidopsis thaliana OX=3702 GN=HEMB1 PE=2 SV=1 && PF00490:Delta-aminolevulinic acid dehydratase	-
novel.1271	317.611	281.629	240.544	580.475	648.127	582.094	279.928	603.565	-1.10657	2.14263e-20	3.7232e-18	-	Niben261Chr04	43651013	43653447	+	1226	-	- && P92520.1 RecName: Full=Uncharacterized mitochondrial protein AtMg00820; AltName: Full=ORF170 && -	-
Niben261Chr08g0174008	16999.3	17244.8	16327	10420.5	9324.26	11716.6	16857	10487.1	0.684704	2.3111e-20	3.99377e-18	Niben261Chr08g0174008	Niben261Chr08	17390751	17392145	-	1395	protein_coding	- && sp|Q9ZS34|CHLP_TOBAC Geranylgeranyl diphosphate reductase, chloroplastic OS=Nicotiana tabacum OX=4097 GN=CHLP PE=2 SV=1 && PF07992:Pyridine nucleotide-disulphide oxidoreductase	Pyr_redox_2
Niben261Chr03g0483003	1224.26	1339.4	1139.74	713.984	693.935	719.001	1234.47	708.973	0.799508	2.3185e-20	3.99377e-18	Niben261Chr03g0483003	Niben261Chr03	48330833	48332967	+	948	protein_coding	- && sp|Q56XR0|BH071_ARATH Transcription factor bHLH71 OS=Arabidopsis thaliana OX=3702 GN=BHLH71 PE=1 SV=1 && PF00010:Helix-loop-helix DNA-binding domain	HLH
Niben261Chr11g1298003	398.664	332.633	335.522	803.958	766.057	651.026	355.606	740.347	-1.0557	2.41619e-20	4.14403e-18	Niben261Chr11g1298003	Niben261Chr11	129833699	129835632	-	792	protein_coding	- && sp|Q55EX9|Y8948_DICDI Putative methyltransferase DDB_G0268948 OS=Dictyostelium discoideum OX=44689 GN=DDB_G0268948 PE=1 SV=2 && PF08241:Methyltransferase domain	Methyltransf_11
Niben261Chr02g1343006	171.529	177.404	228.155	449.868	494.136	428.911	192.363	457.639	-1.25099	2.50749e-20	4.28209e-18	Niben261Chr02g1343006	Niben261Chr02	134324655	134328648	+	1671	protein_coding	- && sp|M4IQR7|CCL5_HUMLU Probable CoA ligase CCL5 OS=Humulus lupulus OX=3486 GN=CCL5 PE=2 SV=1 && PF13193:AMP-binding enzyme C-terminal domain|PF00501:AMP-binding enzyme	AMP-binding
novel.1653	1801.05	1779.59	1834.53	1009.06	858.647	1142.17	1805.06	1003.29	0.847159	3.11159e-20	5.29091e-18	-	Niben261Chr04	187259743	187262163	-	1170	-	- && Q00451.1 RecName: Full=36.4 kDa proline-rich protein && -	-
novel.2058	447.672	296.043	328.296	1581.79	2042.82	1424.6	357.337	1683.07	-2.23461	3.1346e-20	5.30725e-18	-	Niben261Chr06	36857831	36861829	+	1972	-	- && P08299.1 RecName: Full=Pathogenesis-related protein 1A; Short=PR-1A; Flags: Precursor && -	-
Niben261Chr14g0249009	15326.4	15123.7	14939.5	10766.8	9788.19	10831	15129.9	10462	0.532242	3.51168e-20	5.92039e-18	Niben261Chr14g0249009	Niben261Chr14	24885015	24886863	-	738	protein_coding	- && sp|P12360|CB11_SOLLC Chlorophyll a-b binding protein 6A, chloroplastic OS=Solanum lycopersicum OX=4081 GN=CAB6A PE=2 SV=1 && PF00504:Chlorophyll A-B binding protein	-
novel.5700	1271.39	1106.56	798.027	3586.37	3489.17	3485.86	1058.66	3520.47	-1.73327	3.64812e-20	6.12436e-18	-	Niben261Chr16	22502720	22504233	+	1365	-	- && A2XQE8.1 RecName: Full=Senescence-specific cysteine protease SAG39; AltName: Full=Cysteine proteinase SAG39; AltName: Full=Protein SENESCENCE-ASSOCIATED GENE 39; Flags: Precursor && PF00112:Papain family cysteine protease|PF08246:Cathepsin propeptide inhibitor domain (I29)	Peptidase_C1
Niben261Chr07g0756003	7293.75	6855.56	6881.82	4991.12	4855.6	4746.74	7010.38	4864.49	0.52737	3.80932e-20	6.36799e-18	Niben261Chr07g0756003	Niben261Chr07	75622660	75626888	+	1392	protein_coding	- && sp|Q9STF2|PTA16_ARATH Protein PLASTID TRANSCRIPTIONALLY ACTIVE 16, chloroplastic OS=Arabidopsis thaliana OX=3702 GN=PTAC16 PE=1 SV=1 && PF13460:NAD(P)H-binding	-
Niben261Chr10g0373006	290.28	276.085	220.929	728.496	653.975	516.034	262.431	632.835	-1.26905	3.9551e-20	6.57066e-18	Niben261Chr10g0373006	Niben261Chr10	37356974	37359337	-	2364	protein_coding	- && sp|Q9XID3|Y1343_ARATH G-type lectin S-receptor-like serine/threonine-protein kinase At1g34300 OS=Arabidopsis thaliana OX=3702 GN=At1g34300 PE=1 SV=1 && PF01453:D-mannose binding lectin|PF00954:S-locus glycoprotein domain|PF00069:Protein kinase domain	Pkinase
Niben261Chr04g0623002	20928.4	20150.9	20114.8	14585.4	13277.4	14585.9	20398	14149.5	0.527698	3.96372e-20	6.57066e-18	Niben261Chr04g0623002	Niben261Chr04	62382834	62384302	+	816	protein_coding	- && sp|P13869|CB12_PETHY Chlorophyll a-b binding protein, chloroplastic OS=Petunia hybrida OX=4102 PE=2 SV=1 && PF00504:Chlorophyll A-B binding protein	-
Niben261Chr03g1283008	107.441	108.66	100.14	16.4468	14.6194	13.4035	105.414	14.8232	2.83037	4.18901e-20	6.91519e-18	Niben261Chr03g1283008	Niben261Chr03	128310215	128316138	-	1281	protein_coding	- && - && -	-
Niben261Chr02g0868002	228.077	201.797	182.731	552.419	552.614	408.806	204.202	504.613	-1.3033	4.93267e-20	8.10902e-18	Niben261Chr02g0868002	Niben261Chr02	86864673	86865633	+	777	protein_coding	- && sp|K4BWV2|NAP1_SOLLC NAC domain-containing protein 1 OS=Solanum lycopersicum OX=4081 GN=NAP1 PE=2 SV=1 && PF02365:No apical meristem (NAM) protein	NAM
Niben261Chr14g0762005	11.3096	11.0878	26.8418	123.835	129.625	108.185	16.413	120.548	-2.87831	4.99292e-20	8.17415e-18	Niben261Chr14g0762005	Niben261Chr14	76210255	76219179	+	666	protein_coding	- && sp|Q8H1T3|FRI2_TOBAC Ferritin-2, chloroplastic OS=Nicotiana tabacum OX=4097 GN=FER2 PE=2 SV=1 && PF00210:Ferritin-like domain	Ferritin
Niben261Chr07g0800006	6068.54	6022.87	5766.85	3899.82	3484.29	4133.06	5952.76	3839.06	0.632774	5.95629e-20	9.7112e-18	Niben261Chr07g0800006	Niben261Chr07	80033054	80035647	-	1188	protein_coding	- && sp|Q944G9|ALFP2_ARATH Fructose-bisphosphate aldolase 2, chloroplastic OS=Arabidopsis thaliana OX=3702 GN=FBA2 PE=1 SV=2 && PF00274:Fructose-bisphosphate aldolase class-I	-
Niben261Chr06g1089001	113.096	83.1582	76.3958	280.563	301.16	249.879	90.8834	277.201	-1.60285	6.79434e-20	1.10322e-17	Niben261Chr06g1089001	Niben261Chr06	108836091	108837003	+	765	protein_coding	- && sp|Q8W468|ARI8_ARATH Probable E3 ubiquitin-protein ligase ARI8 OS=Arabidopsis thaliana OX=3702 GN=ARI8 PE=2 SV=1 && PF01485:IBR domain, a half RING-finger domain	IBR
Niben261Chr13g0352001	5636.89	5576.04	5237.24	3679.24	3531.08	3877.43	5483.39	3695.92	0.569138	8.87203e-20	1.4347e-17	Niben261Chr13g0352001	Niben261Chr13	35280816	35284647	-	1569	protein_coding	- && sp|O78328|DXS_CAPAN Probable 1-deoxy-D-xylulose-5-phosphate synthase, chloroplastic OS=Capsicum annuum OX=4072 GN=TKT2 PE=2 SV=1 && PF02780:Transketolase, C-terminal domain|PF13292:1-deoxy-D-xylulose-5-phosphate synthase|PF02779:Transketolase, pyrimidine binding domain	-
Niben261Chr13g0841011	871.782	1061.1	1014.83	1973.62	1641.27	1686.92	982.569	1767.27	-0.848113	1.20082e-19	1.93395e-17	Niben261Chr13g0841011	Niben261Chr13	84003668	84005206	+	990	protein_coding	- && sp|B6VJS4|ROMT_VITVI Trans-resveratrol di-O-methyltransferase OS=Vitis vinifera OX=29760 GN=ROMT PE=1 SV=2 && PF00891:O-methyltransferase domain|PF08100:Dimerisation domain	-
Niben261Chr02g0478001	127.233	111.986	74.3311	311.522	372.308	286.26	104.517	323.363	-1.62671	1.41457e-19	2.26898e-17	Niben261Chr02g0478001	Niben261Chr02	47822414	47825590	+	795	protein_coding	- && sp|Q03666|GSTX4_TOBAC Probable glutathione S-transferase OS=Nicotiana tabacum OX=4097 PE=2 SV=1 && PF02798:Glutathione S-transferase, N-terminal domain|PF13410:Glutathione S-transferase, C-terminal domain	GST_N
Niben261Chr02g0566002	12286.9	11897.2	12249.1	8928.67	8217.09	7961.66	12144.4	8369.14	0.537191	1.47158e-19	2.35091e-17	Niben261Chr02g0566002	Niben261Chr02	56642371	56642814	-	444	protein_coding	- && sp|Q9S7N7|PSAG_ARATH Photosystem I reaction center subunit V, chloroplastic OS=Arabidopsis thaliana OX=3702 GN=PSAG PE=1 SV=1 && PF01241:Photosystem I psaG / psaK	-
Niben261Chr16g0764025	1034.83	994.572	816.61	1931.05	2036.97	1553.85	948.67	1840.62	-0.955857	1.50288e-19	2.39126e-17	Niben261Chr16g0764025	Niben261Chr16	76389226	76390878	-	975	protein_coding	- && sp|K4BIZ9|WRK70_SOLLC WRKY DNA-binding transcription factor 70 OS=Solanum lycopersicum OX=4081 GN=WRKY70 PE=2 SV=1 && PF03106:WRKY DNA -binding domain	WRKY
Niben261Chr05g0681003	424.11	455.707	448.051	813.632	761.184	908.564	442.623	827.794	-0.904171	1.8717e-19	2.96619e-17	Niben261Chr05g0681003	Niben261Chr05	68097432	68102356	+	1551	protein_coding	- && sp|A8KYS5|TAL_FRASN Transaldolase OS=Frankia sp. (strain EAN1pec) OX=298653 GN=tal PE=3 SV=1 && PF00923:Transaldolase/Fructose-6-phosphate aldolase	-
Niben261Chr06g0401014	544.746	498.949	377.85	1041.95	914.201	976.539	473.848	977.564	-1.04383	1.87936e-19	2.96647e-17	Niben261Chr06g0401014	Niben261Chr06	40129454	40132748	-	1251	protein_coding	- && sp|P54873|HMCS_ARATH Hydroxymethylglutaryl-CoA synthase OS=Arabidopsis thaliana OX=3702 GN=HMGS PE=1 SV=2 && PF08540:Hydroxymethylglutaryl-coenzyme A synthase C terminal|PF01154:Hydroxymethylglutaryl-coenzyme A synthase N terminal	-
Niben261Chr12g0772015	3871.65	3543.65	3348	5458.4	5415.03	5334.58	3587.77	5402.67	-0.590238	2.04152e-19	3.20965e-17	Niben261Chr12g0772015	Niben261Chr12	77243569	77246420	-	1083	protein_coding	- && sp|Q40143|CYSP3_SOLLC Cysteine proteinase 3 OS=Solanum lycopersicum OX=4081 GN=CYP-3 PE=2 SV=1 && PF00112:Papain family cysteine protease|PF08246:Cathepsin propeptide inhibitor domain (I29)	Peptidase_C1
Niben261Chr17g0091001	106.499	114.204	129.047	24.1865	17.5433	7.65913	116.583	16.463	2.82529	2.05697e-19	3.22116e-17	Niben261Chr17g0091001	Niben261Chr17	9157810	9161440	+	483	protein_coding	- && sp|Q9AT76|AGL27_ARATH Agamous-like MADS-box protein AGL27 OS=Arabidopsis thaliana OX=3702 GN=AGL27 PE=1 SV=1 && PF01486:K-box region	K-box
Niben261Chr01g1472001	8686.72	9107.49	8949.67	6419.09	5462.79	5819.98	8914.62	5900.62	0.59523	2.35864e-19	3.67901e-17	Niben261Chr01g1472001	Niben261Chr01	146645193	146646670	+	813	protein_coding	- && sp|P13869|CB12_PETHY Chlorophyll a-b binding protein, chloroplastic OS=Petunia hybrida OX=4102 PE=2 SV=1 && PF00504:Chlorophyll A-B binding protein	-
Niben261Chr08g0101021	349.655	325.98	249.835	605.629	692.96	707.512	308.49	668.7	-1.11512	2.95529e-19	4.5916e-17	Niben261Chr08g0101021	Niben261Chr08	10141862	10144359	+	1179	protein_coding	- && sp|Q9C9T2|SARD1_ARATH Protein SAR DEFICIENT 1 OS=Arabidopsis thaliana OX=3702 GN=SARD1 PE=1 SV=1 && PF07887:Calmodulin binding protein-like	-
Niben261Chr03g0626008	923.618	778.361	898.167	1434.74	1540.89	1434.17	866.715	1469.93	-0.760693	3.00564e-19	4.65158e-17	Niben261Chr03g0626008	Niben261Chr03	62670545	62674476	+	1857	protein_coding	- && sp|O49675|CCD4_ARATH Probable carotenoid cleavage dioxygenase 4, chloroplastic OS=Arabidopsis thaliana OX=3702 GN=CCD4 PE=1 SV=1 && PF03055:Retinal pigment epithelial membrane protein	RPE65
Niben261Chr02g0510011	1467.42	1246.26	1197.56	742.041	686.138	762.083	1303.75	730.087	0.837334	3.7025e-19	5.70775e-17	Niben261Chr02g0510011	Niben261Chr02	51052940	51058410	+	1392	protein_coding	- && sp|Q41249|PORA_CUCSA Protochlorophyllide reductase, chloroplastic OS=Cucumis sativus OX=3659 GN=PORA PE=2 SV=1 && -	-
Niben261Chr03g1596003	685.173	584.325	639.041	1144.5	1431.73	1101	636.18	1225.74	-0.944867	4.42095e-19	6.7889e-17	Niben261Chr03g1596003	Niben261Chr03	159646173	159650391	-	1506	protein_coding	- && sp|Q8S9J6|ASPA_ARATH Aspartyl protease family protein At5g10770 OS=Arabidopsis thaliana OX=3702 GN=At5g10770 PE=2 SV=1 && PF14543:Xylanase inhibitor N-terminal|PF14541:Xylanase inhibitor C-terminal	-
novel.2230	581.502	558.823	543.03	282.498	285.566	296.791	561.118	288.285	0.961152	4.50391e-19	6.88959e-17	-	Niben261Chr06	9866241	9869390	-	2295	-	- && - && -	-
Niben261Chr11g0684001	85.7645	103.116	97.0434	286.368	256.327	247.007	95.308	263.234	-1.46899	4.7053e-19	7.16997e-17	Niben261Chr11g0684001	Niben261Chr11	68455251	68461511	+	1263	protein_coding	- && sp|Q8LFG1|AMY2_ARATH Probable alpha-amylase 2 OS=Arabidopsis thaliana OX=3702 GN=AMY2 PE=2 SV=1 && PF07821:Alpha-amylase C-terminal beta-sheet domain|PF00128:Alpha amylase, catalytic domain	-
Niben261Chr17g0990006	1024.46	1104.34	1085.03	1787.86	1773.82	1609.37	1071.28	1723.69	-0.68674	4.7876e-19	7.26743e-17	Niben261Chr17g0990006	Niben261Chr17	98983195	98989778	-	489	protein_coding	- && - && PF00582:Universal stress protein family	Usp
Niben261Chr13g1342002	17527.1	17044.1	17037.3	12216.1	11279.4	12600.2	17202.8	12031.9	0.515794	5.12256e-19	7.7462e-17	Niben261Chr13g1342002	Niben261Chr13	134175778	134176398	+	621	protein_coding	- && sp|P29302|PSAD_NICSY Photosystem I reaction center subunit II, chloroplastic OS=Nicotiana sylvestris OX=4096 GN=psaD PE=2 SV=1 && PF02531:PsaD	-
Niben261Chr11g0891001	1348.67	1255.13	1248.14	2116.8	2310.84	1924.36	1283.98	2117.33	-0.721064	5.34026e-19	8.0447e-17	Niben261Chr11g0891001	Niben261Chr11	89138479	89142237	+	1437	protein_coding	- && sp|P27608|AROF_TOBAC Phospho-2-dehydro-3-deoxyheptonate aldolase 1, chloroplastic OS=Nicotiana tabacum OX=4097 GN=DHAPS-1 PE=2 SV=1 && PF01474:Class-II DAHP synthetase family	-
Niben261Chr18g0878001	1416.53	1350.49	1288.41	2452.51	2557.42	2010.52	1351.81	2340.15	-0.791366	5.5611e-19	8.34565e-17	Niben261Chr18g0878001	Niben261Chr18	87830684	87835378	+	2211	protein_coding	- && sp|Q9SJ56|BLH1_ARATH BEL1-like homeodomain protein 1 OS=Arabidopsis thaliana OX=3702 GN=BLH1 PE=1 SV=1 && PF05920:Homeobox KN domain|PF07526:Associated with HOX	POX
novel.3220	251.639	258.345	305.583	565.963	610.117	520.821	271.856	565.634	-1.0574	5.96854e-19	8.9233e-17	-	Niben261Chr09	104045983	104048680	+	2383	-	- && Q9XID3.1 RecName: Full=G-type lectin S-receptor-like serine/threonine-protein kinase At1g34300; Flags: Precursor && PF00069:Protein kinase domain	Pkinase
Niben261Chr19g1221058	45869.9	46229.3	46688.2	32695.3	29311.9	33650.4	46262.5	31885.9	0.536916	6.07605e-19	9.04989e-17	Niben261Chr19g1221058	Niben261Chr19	121981593	121987531	+	1467	protein_coding	- && sp|P27495|CB24_TOBAC Chlorophyll a-b binding protein 40, chloroplastic OS=Nicotiana tabacum OX=4097 GN=CAB40 PE=2 SV=1 && PF00504:Chlorophyll A-B binding protein	-
novel.5687	60778.8	60877.4	58588.4	37424.2	28919.2	39332.5	60081.5	35225.3	0.770303	6.09982e-19	9.05127e-17	-	Niben261Chr16	15965394	15981094	+	3400	-	- && P27493.1 RecName: Full=Chlorophyll a-b binding protein 21, chloroplastic; AltName: Full=LHCII type I CAB-21; Short=LHCP; Flags: Precursor && -	-
Niben261Chr14g0091005	136.658	86.4845	134.209	353.122	305.058	335.087	119.117	331.089	-1.46886	6.22425e-19	9.20144e-17	Niben261Chr14g0091005	Niben261Chr14	9167283	9168311	+	1029	protein_coding	- && sp|O82199|C3H20_ARATH Zinc finger CCCH domain-containing protein 20 OS=Arabidopsis thaliana OX=3702 GN=At2g19810 PE=2 SV=1 && -	-
Niben261Chr12g1107005	1346.79	975.723	878.552	3920.14	4690.88	3703.19	1067.02	4104.74	-1.94331	6.77343e-19	9.97607e-17	Niben261Chr12g1107005	Niben261Chr12	110715303	110730721	-	885	protein_coding	- && sp|O31581|YFHM_BACSU AB hydrolase superfamily protein YfhM OS=Bacillus subtilis (strain 168) OX=224308 GN=yfhM PE=3 SV=1 && PF00561:alpha/beta hydrolase fold	Abhydrolase_1
Niben261Chr07g1377011	1906.61	1879.38	1859.31	1109.67	1066.24	1276.2	1881.77	1150.71	0.709498	7.49598e-19	1.09994e-16	Niben261Chr07g1377011	Niben261Chr07	137710196	137712006	+	1413	protein_coding	- && sp|O48928|C77A3_SOYBN Cytochrome P450 77A3 OS=Glycine max OX=3847 GN=CYP77A3 PE=2 SV=1 && PF00067:Cytochrome P450	p450
Niben261Chr01g1673009	18708	18761.6	18431	13607.3	11977.2	13168	18633.5	12917.5	0.528563	7.83951e-19	1.1461e-16	Niben261Chr01g1673009	Niben261Chr01	167231308	167247842	+	1458	protein_coding	- && sp|Q40565|RCA2_TOBAC Ribulose bisphosphate carboxylase/oxygenase activase 2, chloroplastic OS=Nicotiana tabacum OX=4097 GN=RCA PE=2 SV=1 && PF05627:Cleavage site for pathogenic type III effector avirulence factor Avr|PF00004:ATPase family associated with various cellular activities (AAA)	AAA
Niben261Chr16g0884015	203.573	208.45	166.213	483.729	415.191	415.508	192.745	438.143	-1.18484	8.08697e-19	1.17793e-16	Niben261Chr16g0884015	Niben261Chr16	88284873	88285609	-	660	protein_coding	- && sp|Q03662|GSTX1_TOBAC Probable glutathione S-transferase OS=Nicotiana tabacum OX=4097 PE=2 SV=1 && PF00043:Glutathione S-transferase, C-terminal domain|PF02798:Glutathione S-transferase, N-terminal domain	GST_N
Niben261Chr17g0742005	114.981	97.5723	153.824	365.699	318.703	316.896	122.126	333.766	-1.44877	8.39594e-19	1.21846e-16	Niben261Chr17g0742005	Niben261Chr17	74210784	74212523	+	273	protein_coding	- && sp|P35131|UBC8_ARATH Ubiquitin-conjugating enzyme E2 8 OS=Arabidopsis thaliana OX=3702 GN=UBC8 PE=1 SV=1 && -	-
Niben261Scf00229g0000002	107.441	94.246	55.7483	291.205	285.566	255.623	85.8118	277.465	-1.69003	8.45077e-19	1.22194e-16	Niben261Scf00229g0000002	Niben261Scf00229	71	367	+	297	protein_coding	- && sp|Q84LF2|5EAS3_NICAT 5-epi-aristolochene synthase 3 OS=Nicotiana attenuata OX=49451 PE=1 SV=1 && -	-
Niben261Chr06g1348010	208.285	161.881	114.594	435.356	418.115	454.761	161.587	436.077	-1.42856	8.58309e-19	1.23656e-16	Niben261Chr06g1348010	Niben261Chr06	134810923	134812641	+	774	protein_coding	- && sp|P42849|UMEC_ARMRU Umecyanin OS=Armoracia rusticana OX=3704 PE=1 SV=1 && PF02298:Plastocyanin-like domain	Cu_bind_like
Niben261Chr14g1147006	80.1097	68.7441	64.0073	272.823	253.403	184.776	70.9537	237.001	-1.73678	1.01565e-18	1.45794e-16	Niben261Chr14g1147006	Niben261Chr14	114659394	114668166	+	1293	protein_coding	- && sp|Q8S9J6|ASPA_ARATH Aspartyl protease family protein At5g10770 OS=Arabidopsis thaliana OX=3702 GN=At5g10770 PE=2 SV=1 && PF14543:Xylanase inhibitor N-terminal|PF14541:Xylanase inhibitor C-terminal	-
Niben261Chr17g0569086	48477.7	46601.9	49457	35467	32423.9	34822.2	48178.8	34237.7	0.492823	1.17634e-18	1.6825e-16	Niben261Chr17g0569086	Niben261Chr17	56654498	56655298	-	801	protein_coding	- && sp|P27492|CB21_TOBAC Chlorophyll a-b binding protein 16, chloroplastic OS=Nicotiana tabacum OX=4097 GN=CAB16 PE=2 SV=1 && PF00504:Chlorophyll A-B binding protein	-
Niben261Chr10g0654005	245.041	181.839	139.371	520.493	486.339	462.42	188.75	489.751	-1.37155	1.19451e-18	1.70235e-16	Niben261Chr10g0654005	Niben261Chr10	65398866	65400770	-	1437	protein_coding	- && sp|Q8W2N5|DES_TOBAC 9-divinyl ether synthase OS=Nicotiana tabacum OX=4097 GN=DES1 PE=1 SV=1 && PF00067:Cytochrome P450	p450
Niben261Chr04g1617005	4260.89	4236.63	4174.93	2606.33	2201.68	2863.56	4224.15	2557.19	0.724031	1.23261e-18	1.75035e-16	Niben261Chr04g1617005	Niben261Chr04	161761032	161762411	-	378	protein_coding	- && sp|Q41228|PSAEA_NICSY Photosystem I reaction center subunit IV A, chloroplastic OS=Nicotiana sylvestris OX=4096 GN=PSAEA PE=1 SV=1 && PF02427:Photosystem I reaction centre subunit IV / PsaE	-
Niben261Chr01g0654003	1680.42	1654.29	1676.58	1012.93	940.516	1120.15	1670.43	1024.53	0.705189	1.35832e-18	1.92197e-16	Niben261Chr01g0654003	Niben261Chr01	65471297	65472573	-	1014	protein_coding	- && sp|Q93XM7|MCAT_ARATH Mitochondrial carnitine/acylcarnitine carrier-like protein OS=Arabidopsis thaliana OX=3702 GN=BOU PE=1 SV=1 && PF00153:Mitochondrial carrier protein	Mito_carr
Niben261Chr18g0774012	3342.93	3252.04	3131.2	2218.38	2163.67	2255.61	3242.06	2212.56	0.551307	1.38132e-18	1.94757e-16	Niben261Chr18g0774012	Niben261Chr18	77451551	77453103	-	840	protein_coding	- && sp|O80402|DCAM_NICSY S-adenosylmethionine decarboxylase proenzyme OS=Nicotiana sylvestris OX=4096 GN=SAMDC1 PE=2 SV=1 && PF08132:S-adenosyl-l-methionine decarboxylase leader peptide|PF01536:Adenosylmethionine decarboxylase	SAM_decarbox
Niben261Chr06g1467010	415.628	412.465	410.886	775.902	947.338	719.001	412.993	814.08	-0.978804	1.53356e-18	2.15455e-16	Niben261Chr06g1467010	Niben261Chr06	146665319	146665798	+	318	protein_coding	- && sp|P32026|DEF_TOBAC Defensin-like protein OS=Nicotiana tabacum OX=4097 GN=FST PE=1 SV=1 && PF00304:Gamma-thionin family	-
Niben261Chr18g1476031	1659.68	1543.42	1523.79	924.89	943.44	1043.56	1575.63	970.629	0.699278	2.1233e-18	2.97255e-16	Niben261Chr18g1476031	Niben261Chr18	147566700	147570574	-	978	protein_coding	- && sp|Q9SW18|CHLM_ARATH Magnesium protoporphyrin IX methyltransferase, chloroplastic OS=Arabidopsis thaliana OX=3702 GN=CHLM PE=1 SV=1 && PF07109:Magnesium-protoporphyrin IX methyltransferase C-terminus	-
novel.4638	330.806	267.215	320.037	652.067	657.874	559.116	306.019	623.019	-1.02307	2.40992e-18	3.36192e-16	-	Niben261Chr13	77151262	77153534	+	2136	-	- && Q0V865.1 RecName: Full=Protein FAF-like, chloroplastic; Flags: Precursor && -	-
Niben261Chr13g0142005	622.971	553.279	494.508	1094.2	1055.52	940.158	556.919	1029.96	-0.885731	2.48609e-18	3.44933e-16	Niben261Chr13g0142005	Niben261Chr13	14218740	14220855	+	816	protein_coding	- && - && -	-
Niben261Chr16g0561007	509.875	461.251	457.343	188.654	196.875	254.666	476.156	213.398	1.15825	2.48999e-18	3.44933e-16	Niben261Chr16g0561007	Niben261Chr16	56170750	56172831	-	1188	protein_coding	- && sp|Q9CAI3|CADH1_ARATH Probable cinnamyl alcohol dehydrogenase 1 OS=Arabidopsis thaliana OX=3702 GN=CAD1 PE=2 SV=1 && PF00107:Zinc-binding dehydrogenase|PF08240:Alcohol dehydrogenase GroES-like domain	ADH_N
Niben261Chr13g0959011	1415.59	1323.88	1312.15	878.452	803.093	811.868	1350.54	831.138	0.700844	2.67788e-18	3.69669e-16	Niben261Chr13g0959011	Niben261Chr13	95942136	95948848	-	2037	protein_coding	- && sp|Q9MBA1|CAO_ARATH Chlorophyllide a oxygenase, chloroplastic OS=Arabidopsis thaliana OX=3702 GN=CAO PE=1 SV=1 && PF08417:Pheophorbide a oxygenase|PF00355:Rieske [2Fe-2S] domain	-
Niben261Chr05g0536007	203.573	155.229	155.889	480.827	453.202	355.192	171.563	429.74	-1.32087	2.73384e-18	3.76083e-16	Niben261Chr05g0536007	Niben261Chr05	53636729	53653354	-	2853	protein_coding	- && sp|Q9LKW9|NHX7_ARATH Sodium/hydrogen exchanger 7 OS=Arabidopsis thaliana OX=3702 GN=NHX7 PE=1 SV=1 && PF00999:Sodium/hydrogen exchanger family	Na_H_Exchanger
Niben261Chr06g1377003	8969.46	8320.26	9396.69	5208.8	5131.41	6271.87	8895.47	5537.36	0.683906	2.78803e-18	3.82211e-16	Niben261Chr06g1377003	Niben261Chr06	137701411	137706825	+	2301	protein_coding	- && sp|P21616|AVP_VIGRR Pyrophosphate-energized vacuolar membrane proton pump OS=Vigna radiata var. radiata OX=3916 PE=1 SV=4 && PF03030:Inorganic H+ pyrophosphatase	-
Niben261Chr08g0157008	1492.87	1597.75	1531.01	914.248	782.626	993.772	1540.54	896.882	0.779955	3.17669e-18	4.3399e-16	Niben261Chr08g0157008	Niben261Chr08	15738033	15740176	+	1143	protein_coding	- && sp|Q949X0|ADS3_ARATH Palmitoyl-monogalactosyldiacylglycerol delta-7 desaturase, chloroplastic OS=Arabidopsis thaliana OX=3702 GN=ADS3 PE=1 SV=2 && PF00487:Fatty acid desaturase	-
Niben261Chr18g0107002	153.622	146.358	117.691	388.918	404.47	296.791	139.224	363.393	-1.38294	3.41944e-18	4.65549e-16	Niben261Chr18g0107002	Niben261Chr18	10739617	10742284	+	1347	protein_coding	- && sp|P37121|C76A1_SOLME Cytochrome P450 76A1 (Fragment) OS=Solanum melongena OX=4111 GN=CYP76A1 PE=2 SV=1 && PF00067:Cytochrome P450	p450
Niben261Chr10g1078023	207.343	169.643	136.274	400.528	448.329	399.232	171.086	416.03	-1.27863	3.49936e-18	4.74799e-16	Niben261Chr10g1078023	Niben261Chr10	107837919	107844377	-	2811	protein_coding	- && sp|Q84K47|AB2A_ARATH ABC transporter A family member 2 OS=Arabidopsis thaliana OX=3702 GN=ABCA2 PE=2 SV=1 && PF00005:ABC transporter|PF12698:ABC-2 family transporter protein|PF13304:AAA domain, putative AbiEii toxin, Type IV TA system	ABC_tran
novel.136	390.181	284.955	328.296	118.03	109.158	147.438	334.477	124.875	1.42316	3.62398e-18	4.90029e-16	-	Niben261Chr01	103543201	103546970	+	3770	-	- && - && -	-
Niben261Chr02g0849001	624.856	513.363	488.314	2358.66	3083.72	1795.11	542.178	2412.5	-2.15332	3.75208e-18	5.05624e-16	Niben261Chr02g0849001	Niben261Chr02	84908018	84909947	-	1551	protein_coding	- && sp|Q9FLD5|ASD_ARATH AAA-ATPase ASD, mitochondrial OS=Arabidopsis thaliana OX=3702 GN=AATP1 PE=1 SV=1 && PF14363:Domain associated at C-terminal with AAA|PF00004:ATPase family associated with various cellular activities (AAA)	AAA
Niben261Scf01408g0000013	815.234	685.224	807.318	1460.86	1416.13	1218.76	769.259	1365.25	-0.826305	4.143e-18	5.56412e-16	Niben261Scf01408g0000013	Niben261Scf01408	57924	59758	-	867	protein_coding	- && sp|Q8VY07|EPN1_ARATH Clathrin interactor EPSIN 1 OS=Arabidopsis thaliana OX=3702 GN=EPSIN1 PE=1 SV=1 && PF01417:ENTH domain	-
novel.5127	66347.8	63926.5	64230.3	43361.5	38249.3	46850.9	64834.9	42820.5	0.598468	4.39598e-18	5.88393e-16	-	Niben261Chr14	18602311	18604556	-	1403	-	- && P27494.1 RecName: Full=Chlorophyll a-b binding protein 36, chloroplastic; AltName: Full=LHCII type I CAB-36; Short=LHCP; Flags: Precursor && -	-
Niben261Chr04g0107024	579.617	597.63	408.821	1031.31	1042.85	1101	528.689	1058.39	-1.00149	5.45102e-18	7.27151e-16	Niben261Chr04g0107024	Niben261Chr04	10707204	10708785	+	990	protein_coding	- && sp|Q9SV68|QORH_ARATH Chloroplast envelope quinone oxidoreductase homolog OS=Arabidopsis thaliana OX=3702 GN=CEQORH PE=1 SV=1 && PF13602:Zinc-binding dehydrogenase|PF08240:Alcohol dehydrogenase GroES-like domain	ADH_N
Niben261Chr09g0249004	755.858	821.603	769.12	1451.19	1208.54	1326.94	782.194	1328.89	-0.765376	5.47648e-18	7.28097e-16	Niben261Chr09g0249004	Niben261Chr09	24977138	24984103	+	1536	protein_coding	- && sp|Q94AR8|LEUC_ARATH 3-isopropylmalate dehydratase large subunit, chloroplastic OS=Arabidopsis thaliana OX=3702 GN=IIL1 PE=1 SV=1 && PF00330:Aconitase family (aconitate hydratase)	Aconitase
Niben261Chr16g0522010	1970.7	1808.41	1787.04	1231.57	1181.25	1169.93	1855.39	1194.25	0.63614	6.67521e-18	8.84498e-16	Niben261Chr16g0522010	Niben261Chr16	52208776	52211499	-	1323	protein_coding	- && sp|P37272|PSY_CAPAN Bifunctional 15-cis-phytoene synthase, chromoplastic OS=Capsicum annuum OX=4072 GN=PSY1 PE=1 SV=1 && PF00494:Squalene/phytoene synthase	-
Niben261Chr10g0993007	127.233	105.334	79.493	304.749	267.048	297.749	104.02	289.849	-1.47478	7.07075e-18	9.33787e-16	Niben261Chr10g0993007	Niben261Chr10	99331837	99333555	-	789	protein_coding	- && sp|B8BKP4|SWT14_ORYSI Bidirectional sugar transporter SWEET14 OS=Oryza sativa subsp. indica OX=39946 GN=SWEET14 PE=2 SV=1 && PF03083:Sugar efflux transporter for intercellular exchange	-
Niben261Chr18g0288001	82.9371	54.33	38.1979	244.767	211.494	202.01	58.4883	219.424	-1.89882	7.15466e-18	9.41729e-16	Niben261Chr18g0288001	Niben261Chr18	28796368	28798627	-	777	protein_coding	- && sp|P42849|UMEC_ARMRU Umecyanin OS=Armoracia rusticana OX=3704 PE=1 SV=1 && PF02298:Plastocyanin-like domain	Cu_bind_like
Niben261Chr16g0423003	36612	34355.4	34674.4	25993.7	23918.3	22292.8	35214	24068.3	0.549044	7.22064e-18	9.47267e-16	Niben261Chr16g0423003	Niben261Chr16	42335317	42339219	+	1068	protein_coding	- && sp|P27141|CAHC_TOBAC Carbonic anhydrase, chloroplastic OS=Nicotiana tabacum OX=4097 PE=2 SV=1 && PF00484:Carbonic anhydrase	-
Niben261Chr06g0353014	20097.2	19084.3	19649.2	14745	13914.8	13494.4	19610.2	14051.4	0.480942	8.00797e-18	1.04709e-15	Niben261Chr06g0353014	Niben261Chr06	35311973	35315156	-	1215	protein_coding	- && sp|Q6SJV8|CRD1_GOSHI Magnesium-protoporphyrin IX monomethyl ester [oxidative] cyclase, chloroplastic OS=Gossypium hirsutum OX=3635 GN=CRD1 PE=2 SV=2 && PF02915:Rubrerythrin	-
Niben261Chr07g1128012	75.3974	55.4388	54.7159	215.743	259.251	172.33	61.8507	215.775	-1.79662	9.86365e-18	1.28489e-15	Niben261Chr07g1128012	Niben261Chr07	112864726	112870422	+	1029	protein_coding	- && sp|Q9C942|CSE_ARATH Caffeoylshikimate esterase OS=Arabidopsis thaliana OX=3702 GN=CSE PE=1 SV=1 && PF12146:Serine aminopeptidase, S33	-
Niben261Chr17g0005016	850.105	874.824	811.448	1370.89	1361.55	1300.14	845.459	1344.19	-0.669154	9.89152e-18	1.28489e-15	Niben261Chr17g0005016	Niben261Chr17	496845	499573	-	1329	protein_coding	- && sp|Q8S9G6|T5AT_TAXWC Taxadien-5-alpha-ol O-acetyltransferase OS=Taxus wallichiana var. chinensis OX=29808 PE=2 SV=1 && PF02458:Transferase family	-
Niben261Chr07g0372012	6508.68	6288.98	6789.94	4236.5	3893.64	4685.47	6529.2	4271.87	0.61204	1.05503e-17	1.36599e-15	Niben261Chr07g0372012	Niben261Chr07	37148156	37148515	-	360	protein_coding	- && - && PF06596:Photosystem II reaction centre X protein (PsbX)	-
Niben261Chr03g0184002	0.942467	4.4351	4.1295	71.5919	80.8941	93.8243	3.16903	82.1034	-4.73524	1.08394e-17	1.39884e-15	Niben261Chr03g0184002	Niben261Chr03	18390721	18396091	-	825	protein_coding	- && - && PF13963:Transposase-associated domain	-
Niben261Chr12g0828015	2288.31	2124.42	2364.14	3341.6	3265	3600.75	2258.96	3402.45	-0.590612	1.12409e-17	1.44595e-15	Niben261Chr12g0828015	Niben261Chr12	82801113	82805648	+	1452	protein_coding	- && sp|Q9SKX5|PAO2_ARATH Polyamine oxidase 2 OS=Arabidopsis thaliana OX=3702 GN=PAO2 PE=1 SV=1 && PF01593:Flavin containing amine oxidoreductase	Amino_oxidase
Niben261Chr09g0591010	4576.62	4431.78	4369.02	3208.09	2996.98	3162.26	4459.14	3122.44	0.514184	1.25027e-17	1.60306e-15	Niben261Chr09g0591010	Niben261Chr09	59161578	59167751	+	1218	protein_coding	- && sp|Q94CJ5|RER4_ARATH Protein RETICULATA-RELATED 4, chloroplastic OS=Arabidopsis thaliana OX=3702 GN=RER4 PE=2 SV=1 && PF11891:Protein RETICULATA-related	-
Niben261Chr10g0301002	2544.66	2526.9	2501.45	1779.16	1645.17	1709.9	2524.34	1711.41	0.560737	1.28745e-17	1.6454e-15	Niben261Chr10g0301002	Niben261Chr10	30149902	30157257	-	1218	protein_coding	- && sp|Q9M158|STR4_ARATH Rhodanese-like domain-containing protein 4, chloroplastic OS=Arabidopsis thaliana OX=3702 GN=STR4 PE=1 SV=2 && -	-
Niben261Chr15g0653006	16359.3	15640.4	16116.4	11945.2	11781.3	11871.6	16038.7	11866.1	0.434777	1.304e-17	1.6612e-15	Niben261Chr15g0653006	Niben261Chr15	65338264	65343136	-	798	protein_coding	- && sp|P18212|PSBP2_TOBAC Oxygen-evolving enhancer protein 2-2, chloroplastic OS=Nicotiana tabacum OX=4097 GN=PSBP2 PE=1 SV=2 && PF01789:PsbP	-
Niben261Chr12g0044006	1609.73	1706.41	1593.99	947.142	916.15	1106.74	1636.71	990.012	0.724848	1.33628e-17	1.69686e-15	Niben261Chr12g0044006	Niben261Chr12	4449219	4451384	+	1140	protein_coding	- && sp|Q949X0|ADS3_ARATH Palmitoyl-monogalactosyldiacylglycerol delta-7 desaturase, chloroplastic OS=Arabidopsis thaliana OX=3702 GN=ADS3 PE=1 SV=2 && PF00487:Fatty acid desaturase	-
Niben261Chr11g1361010	149.852	108.66	120.788	316.359	297.261	336.044	126.433	316.555	-1.3189	1.42161e-17	1.79945e-15	Niben261Chr11g1361010	Niben261Chr11	136101409	136104279	+	1680	protein_coding	- && sp|Q9LHA8|HS704_ARATH Heat shock 70 kDa protein 4 OS=Arabidopsis thaliana OX=3702 GN=HSP70-4 PE=1 SV=1 && PF00012:Hsp70 protein	HSP70
Niben261Chr14g0368003	213.94	188.492	209.572	446.966	504.857	392.53	204.001	448.118	-1.13341	1.54019e-17	1.94005e-15	Niben261Chr14g0368003	Niben261Chr14	36852868	36854464	-	1287	protein_coding	- && sp|P49598|P2C37_ARATH Protein phosphatase 2C 37 OS=Arabidopsis thaliana OX=3702 GN=PP2CA PE=1 SV=1 && PF00481:Protein phosphatase 2C	PP2C
Niben261Chr10g0145003	1250.65	1046.68	915.718	2981.71	3128.55	2453.79	1071.02	2854.68	-1.41395	1.54249e-17	1.94005e-15	Niben261Chr10g0145003	Niben261Chr10	14506869	14511163	-	1911	protein_coding	- && sp|Q0GXS4|NFP_MEDTR Serine/threonine receptor-like kinase NFP OS=Medicago truncatula OX=3880 GN=NFP PE=1 SV=1 && PF00069:Protein kinase domain	Pkinase
Niben261Chr17g0569069	1598.42	1658.73	1621.86	1010.03	918.099	1096.21	1626.34	1008.11	0.689623	1.60393e-17	2.01095e-15	Niben261Chr17g0569069	Niben261Chr17	56578919	56579392	-	417	protein_coding	- && sp|P12331|CB22_ORYSJ Chlorophyll a-b binding protein 2, chloroplastic OS=Oryza sativa subsp. japonica OX=39947 GN=CAB2R PE=2 SV=2 && PF00504:Chlorophyll A-B binding protein	-
Niben261Chr16g0224011	65.0302	87.5933	44.3922	235.092	213.443	210.626	65.6719	219.721	-1.74752	1.63021e-17	2.03746e-15	Niben261Chr16g0224011	Niben261Chr16	22477254	22477659	+	351	protein_coding	- && sp|Q9FJ47|SAG12_ARATH Senescence-specific cysteine protease SAG12 OS=Arabidopsis thaliana OX=3702 GN=SAG12 PE=1 SV=1 && PF00112:Papain family cysteine protease	Peptidase_C1
Niben261Chr18g0368002	64.0878	63.2002	73.2987	203.166	209.545	189.563	66.8622	200.758	-1.58606	1.65634e-17	2.0636e-15	Niben261Chr18g0368002	Niben261Chr18	36843788	36852813	+	858	protein_coding	- && sp|Q38910|XTH23_ARATH Probable xyloglucan endotransglucosylase/hydrolase protein 23 OS=Arabidopsis thaliana OX=3702 GN=XTH23 PE=2 SV=1 && PF06955:Xyloglucan endo-transglycosylase (XET) C-terminus|PF00722:Glycosyl hydrolases family 16	-
Niben261Chr08g1093014	16958.8	16452	16336.3	11254.4	9888.57	11991.3	16582.4	11044.8	0.586287	1.75577e-17	2.18062e-15	Niben261Chr08g1093014	Niben261Chr08	109354250	109355738	+	822	protein_coding	- && sp|P27522|CB13_SOLLC Chlorophyll a-b binding protein 8, chloroplastic OS=Solanum lycopersicum OX=4081 GN=CAB8 PE=3 SV=1 && PF00504:Chlorophyll A-B binding protein	-
Niben261Chr16g1388009	1075.35	989.028	1079.87	1694.02	1782.59	1558.63	1048.08	1678.42	-0.67864	1.93099e-17	2.39075e-15	Niben261Chr16g1388009	Niben261Chr16	138870179	138871954	-	1368	protein_coding	- && sp|Q9LIS3|GAE6_ARATH UDP-glucuronate 4-epimerase 6 OS=Arabidopsis thaliana OX=3702 GN=GAE6 PE=1 SV=1 && PF16363:GDP-mannose 4,6 dehydratase	-
Niben261Chr11g0271006	73.5124	67.6353	48.5217	238.962	203.697	181.904	63.2231	208.188	-1.71709	2.09973e-17	2.59157e-15	Niben261Chr11g0271006	Niben261Chr11	27139864	27142932	-	2139	protein_coding	- && sp|Q9ZR08|Y4230_ARATH G-type lectin S-receptor-like serine/threonine-protein kinase At4g03230 OS=Arabidopsis thaliana OX=3702 GN=At4g03230 PE=3 SV=3 && PF08276:PAN-like domain|PF00954:S-locus glycoprotein domain|PF07714:Protein tyrosine kinase|PF01453:D-mannose binding lectin	B_lectin
Niben261Chr15g0993014	3478.65	3382.88	3587.51	2511.52	2199.73	2232.64	3483.01	2314.63	0.589636	2.14001e-17	2.63308e-15	Niben261Chr15g0993014	Niben261Chr15	99384785	99385907	+	621	protein_coding	- && sp|P46486|PSAF_FLATR Photosystem I reaction center subunit III, chloroplastic OS=Flaveria trinervia OX=4227 GN=PSAF PE=2 SV=1 && PF02507:Photosystem I reaction centre subunit III	-
Niben261Scf01657g0000001	342.115	302.696	290.098	616.271	604.269	565.818	311.636	595.453	-0.932262	2.32341e-17	2.84988e-15	Niben261Scf01657g0000001	Niben261Scf01657	18080	19922	+	1404	protein_coding	- && sp|Q9ZVX4|U90A1_ARATH UDP-glycosyltransferase 90A1 OS=Arabidopsis thaliana OX=3702 GN=UGT90A1 PE=2 SV=1 && PF00201:UDP-glucoronosyl and UDP-glucosyl transferase	UDPGT
Niben261Chr10g0982004	2148.82	2081.17	2217.54	1490.85	1372.28	1415.98	2149.18	1426.37	0.591575	2.37288e-17	2.90158e-15	Niben261Chr10g0982004	Niben261Chr10	98203823	98205863	-	693	protein_coding	- && sp|Q94A65|STR14_ARATH Rhodanese-like domain-containing protein 14, chloroplastic OS=Arabidopsis thaliana OX=3702 GN=At4g27700 PE=2 SV=1 && PF00581:Rhodanese-like domain	Rhodanese
Niben261Chr01g0695010	252.581	253.91	268.418	525.33	495.111	487.312	258.303	502.584	-0.960422	2.43465e-17	2.96795e-15	Niben261Chr01g0695010	Niben261Chr01	69544581	69550086	-	1866	protein_coding	- && sp|Q9FYH7|VSR6_ARATH Vacuolar-sorting receptor 6 OS=Arabidopsis thaliana OX=3702 GN=VSR6 PE=2 SV=3 && PF02225:PA domain	-
Niben261Chr19g0215003	97.0741	88.7021	77.4282	226.385	239.758	249.879	87.7348	238.674	-1.44186	2.49453e-17	3.03162e-15	Niben261Chr19g0215003	Niben261Chr19	21554325	21560222	+	1206	protein_coding	- && sp|Q9FKH6|B561P_ARATH Cytochrome b561 and DOMON domain-containing protein At5g35735 OS=Arabidopsis thaliana OX=3702 GN=At5g35735 PE=2 SV=1 && PF03188:Eukaryotic cytochrome b561|PF04526:Protein of unknown function (DUF568)	Cytochrom_B561
Niben261Chr07g1451006	1313.8	1160.89	1089.16	1976.52	2074.01	1816.17	1187.95	1955.57	-0.718203	2.69774e-17	3.26856e-15	Niben261Chr07g1451006	Niben261Chr07	145128261	145132695	+	2226	protein_coding	- && sp|Q6R8G7|PHO13_ARATH Phosphate transporter PHO1 homolog 3 OS=Arabidopsis thaliana OX=3702 GN=PHO1;H3 PE=2 SV=2 && PF03105:SPX domain|PF03124:EXS family	SPX
Niben261Chr03g0868002	2277	2381.65	2293.94	1560.51	1398.59	1591.18	2317.53	1516.76	0.6113	2.91383e-17	3.5196e-15	Niben261Chr03g0868002	Niben261Chr03	86866529	86869564	+	1158	protein_coding	- && sp|Q43082|HEM3_PEA Porphobilinogen deaminase, chloroplastic OS=Pisum sativum OX=3888 GN=HEMC PE=1 SV=1 && PF01379:Porphobilinogen deaminase, dipyromethane cofactor binding domain|PF03900:Porphobilinogen deaminase, C-terminal domain	-
Niben261Chr17g0171009	147.025	165.208	130.079	374.406	462.948	307.323	147.437	381.559	-1.37296	2.99118e-17	3.59265e-15	Niben261Chr17g0171009	Niben261Chr17	17142595	17146774	-	1254	protein_coding	- && sp|Q9C9T2|SARD1_ARATH Protein SAR DEFICIENT 1 OS=Arabidopsis thaliana OX=3702 GN=SARD1 PE=1 SV=1 && PF07887:Calmodulin binding protein-like	-
Niben261Chr02g0347021	168.702	174.078	129.047	385.048	401.547	332.215	157.275	372.937	-1.24569	2.99244e-17	3.59265e-15	Niben261Chr02g0347021	Niben261Chr02	34679371	34683854	+	1299	protein_coding	- && sp|W8JWW3|CA225_CATRO Cytochrome P450 72A225 OS=Catharanthus roseus OX=4058 GN=CYP72A225 PE=2 SV=1 && PF00067:Cytochrome P450	p450
Niben261Chr12g0314003	26219.4	26313.5	26581.6	20112.5	19044.2	19714.6	26371.5	19623.8	0.426371	3.33665e-17	3.9938e-15	Niben261Chr12g0314003	Niben261Chr12	31399346	31401478	-	1434	protein_coding	- && sp|Q40460|RCA1_TOBAC Ribulose bisphosphate carboxylase/oxygenase activase 1, chloroplastic OS=Nicotiana tabacum OX=4097 PE=1 SV=1 && PF00004:ATPase family associated with various cellular activities (AAA)	AAA
Niben261Chr08g1346007	1169.6	1062.21	1182.07	1751.1	1846.92	1717.56	1137.96	1771.86	-0.638033	3.42102e-17	4.08246e-15	Niben261Chr08g1346007	Niben261Chr08	134612954	134618398	-	1593	protein_coding	- && sp|Q9LDV4|ALAT2_ARATH Alanine aminotransferase 2, mitochondrial OS=Arabidopsis thaliana OX=3702 GN=ALAAT2 PE=1 SV=1 && PF00155:Aminotransferase class I and II	Aminotran_1_2
Niben261Chr17g1522007	958.489	858.193	901.264	1412.49	1425.88	1438.96	905.982	1425.78	-0.653124	3.61325e-17	4.2989e-15	Niben261Chr17g1522007	Niben261Chr17	152187955	152189799	+	1332	protein_coding	- && sp|O24606|EIN3_ARATH Protein ETHYLENE INSENSITIVE 3 OS=Arabidopsis thaliana OX=3702 GN=EIN3 PE=1 SV=1 && PF04873:Ethylene insensitive 3	EIN3
Niben261Chr07g1369024	18225.4	16887.8	17951	12181.3	11171.2	12995.6	17688.1	12116	0.545897	4.09149e-17	4.85332e-15	Niben261Chr07g1369024	Niben261Chr07	136935647	136937430	-	687	protein_coding	- && sp|Q41932|PSBQ2_ARATH Oxygen-evolving enhancer protein 3-2, chloroplastic OS=Arabidopsis thaliana OX=3702 GN=PSBQ2 PE=1 SV=2 && PF05757:Oxygen evolving enhancer protein 3 (PsbQ)	-
Niben261Chr17g0417003	827.486	689.659	735.052	1241.25	1316.72	1213.01	750.732	1257	-0.741887	4.16525e-17	4.92606e-15	Niben261Chr17g0417003	Niben261Chr17	41608877	41609824	-	855	protein_coding	- && sp|Q94KL8|SILD_PODPE Secoisolariciresinol dehydrogenase (Fragment) OS=Podophyllum peltatum OX=35933 PE=1 SV=1 && PF13561:Enoyl-(Acyl carrier protein) reductase	-
Niben261Chr12g0684004	110.269	79.8319	60.9102	253.474	276.794	236.476	83.6702	255.581	-1.60473	4.34314e-17	5.12116e-15	Niben261Chr12g0684004	Niben261Chr12	68397943	68400723	-	1449	protein_coding	- && sp|O64851|IQM4_ARATH IQ domain-containing protein IQM4 OS=Arabidopsis thaliana OX=3702 GN=IQM4 PE=2 SV=1 && -	-
Niben261Chr03g1481006	7599.11	7523.05	7792.38	5709.94	5454.02	5518.4	7638.18	5560.79	0.457957	4.68395e-17	5.50662e-15	Niben261Chr03g1481006	Niben261Chr03	148132176	148132535	-	360	protein_coding	- && - && PF06596:Photosystem II reaction centre X protein (PsbX)	-
Niben261Chr03g0741002	1078.18	1120.97	1087.09	2015.22	1601.31	2172.32	1095.42	1929.62	-0.817128	4.93741e-17	5.77847e-15	Niben261Chr03g0741002	Niben261Chr03	74167538	74169838	+	1167	protein_coding	- && sp|Q08298|RD22_ARATH BURP domain protein RD22 OS=Arabidopsis thaliana OX=3702 GN=RD22 PE=2 SV=1 && PF03181:BURP domain	-
Niben261Chr02g0064002	273.315	281.629	274.612	588.215	593.548	478.696	276.519	553.486	-1.00137	4.94435e-17	5.77847e-15	Niben261Chr02g0064002	Niben261Chr02	6429660	6432681	+	1437	protein_coding	- && sp|F6H9N6|C7A15_VITVI Beta-amyrin 28-monooxygenase OS=Vitis vinifera OX=29760 GN=CYP716A15 PE=1 SV=1 && PF00067:Cytochrome P450	p450
Niben261Chr03g0703003	3768.93	3777.6	3585.44	2251.28	2215.33	2670.16	3710.66	2378.92	0.641286	4.97254e-17	5.79433e-15	Niben261Chr03g0703003	Niben261Chr03	70355021	70366578	+	1293	protein_coding	- && sp|P43210|HEM2_SOYBN Delta-aminolevulinic acid dehydratase, chloroplastic OS=Glycine max OX=3847 GN=HEMB PE=2 SV=1 && PF00490:Delta-aminolevulinic acid dehydratase	-
Niben261Chr18g0475008	616.373	630.894	678.271	1040.99	1031.16	1083.77	641.846	1051.97	-0.713155	5.37727e-17	6.24757e-15	Niben261Chr18g0475008	Niben261Chr18	47523198	47528103	+	1032	protein_coding	- && sp|P28734|AATC_DAUCA Aspartate aminotransferase, cytoplasmic OS=Daucus carota OX=4039 PE=2 SV=1 && PF00155:Aminotransferase class I and II	Aminotran_1_2
Niben261Chr11g0815003	1447.63	1469.13	1190.33	2266.75	2155.88	2229.76	1369.03	2217.47	-0.69579	5.4687e-17	6.33522e-15	Niben261Chr11g0815003	Niben261Chr11	81578911	81582405	-	1464	protein_coding	- && sp|W8JMU7|CYQ32_CATRO Cytochrome P450 81Q32 OS=Catharanthus roseus OX=4058 GN=CYP81Q32 PE=2 SV=1 && PF00067:Cytochrome P450	p450
Niben261Chr13g0010023	209.228	164.099	133.177	475.022	415.191	370.51	168.834	420.241	-1.31203	5.6258e-17	6.49821e-15	Niben261Chr13g0010023	Niben261Chr13	1084870	1087683	-	783	protein_coding	- && sp|I1LPE9|NAC6_SOYBN NAC domain-containing protein 6 OS=Glycine max OX=3847 GN=NAC6 PE=2 SV=1 && PF02365:No apical meristem (NAM) protein	NAM
Niben261Chr01g1472002	10752.6	10445.8	10127.6	6879.6	6054.39	7525.09	10442	6819.69	0.614618	6.25944e-17	7.2091e-15	Niben261Chr01g1472002	Niben261Chr01	147113119	147114689	+	813	protein_coding	- && sp|P13869|CB12_PETHY Chlorophyll a-b binding protein, chloroplastic OS=Petunia hybrida OX=4102 PE=2 SV=1 && PF00504:Chlorophyll A-B binding protein	-
Niben261Chr17g0873016	5678.36	5597.1	5303.32	4040.11	3913.13	3800.84	5526.26	3918.03	0.496243	6.79612e-17	7.8045e-15	Niben261Chr17g0873016	Niben261Chr17	87310703	87315185	-	1563	protein_coding	- && sp|P55243|GLGL3_SOLTU Glucose-1-phosphate adenylyltransferase large subunit 3, chloroplastic/amyloplastic OS=Solanum tuberosum OX=4113 GN=AGPS3 PE=2 SV=1 && PF00483:Nucleotidyl transferase	-
Niben261Chr13g0012011	461.809	374.766	314.875	830.079	983.399	708.469	383.817	840.649	-1.12914	7.76635e-17	8.89291e-15	Niben261Chr13g0012011	Niben261Chr13	1153360	1158888	+	936	protein_coding	- && sp|Q9SX98|LHTL8_ARATH Lysine histidine transporter-like 8 OS=Arabidopsis thaliana OX=3702 GN=AATL1 PE=1 SV=1 && PF01490:Transmembrane amino acid transporter protein	Aa_trans
Niben261Chr04g1217010	0	0	0	174.143	177.382	202.967	0	184.831	-9.93637	8.17777e-17	9.33703e-15	Niben261Chr04g1217010	Niben261Chr04	121723162	121728853	+	1485	protein_coding	- && sp|W8JWW3|CA225_CATRO Cytochrome P450 72A225 OS=Catharanthus roseus OX=4058 GN=CYP72A225 PE=2 SV=1 && PF00067:Cytochrome P450	p450
Niben261Chr09g1336011	1683.25	1463.58	1519.66	909.411	1011.66	980.368	1555.5	967.148	0.686363	9.16324e-17	1.04321e-14	Niben261Chr09g1336011	Niben261Chr09	133666231	133671501	+	2145	protein_coding	- && sp|Q9SCV9|BGAL3_ARATH Beta-galactosidase 3 OS=Arabidopsis thaliana OX=3702 GN=BGAL3 PE=2 SV=1 && PF01301:Glycosyl hydrolases family 35|PF17834:Beta-sandwich domain in beta galactosidase	-
Niben261Chr08g0401015	547.573	552.171	517.22	917.151	993.146	856.865	538.988	922.387	-0.775054	9.47593e-17	1.07572e-14	Niben261Chr08g0401015	Niben261Chr08	40155159	40159928	+	3021	protein_coding	- && sp|Q9LM76|PUB44_ARATH U-box domain-containing protein 44 OS=Arabidopsis thaliana OX=3702 GN=PUB44 PE=1 SV=1 && PF04564:U-box domain	U-box
Niben261Chr19g1450011	104.614	100.899	89.8167	276.693	279.718	223.072	98.4431	259.828	-1.39916	1.01506e-16	1.14733e-14	Niben261Chr19g1450011	Niben261Chr19	145062579	145065283	-	1710	protein_coding	- && sp|Q9C6K9|LRL11_ARATH LEAF RUST 10 DISEASE-RESISTANCE LOCUS RECEPTOR-LIKE PROTEIN KINASE-like 1.1 OS=Arabidopsis thaliana OX=3702 GN=LRK10L-1.1 PE=2 SV=1 && PF14380:Wall-associated receptor kinase C-terminal|PF00069:Protein kinase domain	Pkinase
Niben261Chr01g0363002	217.71	235.061	213.702	466.315	432.735	433.698	222.157	444.249	-1.00092	1.01647e-16	1.14733e-14	Niben261Chr01g0363002	Niben261Chr01	36282921	36295833	-	4332	protein_coding	- && sp|O81832|Y4729_ARATH G-type lectin S-receptor-like serine/threonine-protein kinase At4g27290 OS=Arabidopsis thaliana OX=3702 GN=At4g27290 PE=3 SV=4 && PF11883:Domain of unknown function (DUF3403)|PF00069:Protein kinase domain|PF00954:S-locus glycoprotein domain|PF08276:PAN-like domain|PF01453:D-mannose binding lectin	Pkinase
Niben261Chr01g0243007	1784.09	1833.92	1701.36	2708.88	2547.68	2560.06	1773.12	2605.54	-0.555456	1.0826e-16	1.21851e-14	Niben261Chr01g0243007	Niben261Chr01	24310322	24314813	-	1176	protein_coding	- && sp|Q8S948|SPS1_ARATH Solanesyl diphosphate synthase 1, chloroplastic OS=Arabidopsis thaliana OX=3702 GN=SPS1 PE=1 SV=1 && PF00348:Polyprenyl synthetase	-
Niben261Chr03g1557005	540.976	494.514	483.152	837.819	884.962	858.78	506.214	860.52	-0.764278	1.09166e-16	1.22523e-14	Niben261Chr03g1557005	Niben261Chr03	155709824	155713005	-	3072	protein_coding	- && sp|O49545|BAME1_ARATH Leucine-rich repeat receptor-like serine/threonine-protein kinase BAM1 OS=Arabidopsis thaliana OX=3702 GN=BAM1 PE=1 SV=1 && PF00069:Protein kinase domain|PF13855:Leucine rich repeat|PF08263:Leucine rich repeat N-terminal domain	Pkinase
Niben261Chr09g1294018	2125.26	2083.39	2090.56	1419.26	1347.91	1472.47	2099.74	1413.21	0.571274	1.18705e-16	1.32852e-14	Niben261Chr09g1294018	Niben261Chr09	129405504	129408707	-	1764	protein_coding	- && sp|Q39161|NIR_ARATH Ferredoxin--nitrite reductase, chloroplastic OS=Arabidopsis thaliana OX=3702 GN=NIR1 PE=1 SV=1 && PF01077:Nitrite and sulphite reductase 4Fe-4S domain|PF03460:Nitrite/Sulfite reductase ferredoxin-like half domain	-
Niben261Chr06g0826001	2424.02	1554.5	1519.66	7279.16	7446.16	6673.02	1832.73	7132.78	-1.96021	1.39909e-16	1.56142e-14	Niben261Chr06g0826001	Niben261Chr06	82670774	82671607	+	555	protein_coding	- && - && PF06521:PAR1 protein	-
Niben261Chr14g0751013	58.433	55.4388	48.5217	188.654	226.114	147.438	54.1311	187.402	-1.79004	1.52186e-16	1.69367e-14	Niben261Chr14g0751013	Niben261Chr14	75137210	75139415	-	777	protein_coding	- && - && -	-
Niben261Chr19g1035002	110.269	131.944	83.6225	309.587	302.135	256.581	108.612	289.434	-1.41656	1.52703e-16	1.69466e-14	Niben261Chr19g1035002	Niben261Chr19	103577673	103589412	+	2049	protein_coding	- && - && -	-
Niben261Chr15g1165011	20404.4	19175.2	19328.1	13877.2	12820.3	14666.3	19635.9	13787.9	0.510123	1.78216e-16	1.97228e-14	Niben261Chr15g1165011	Niben261Chr15	116520447	116522388	-	999	protein_coding	- && sp|Q40459|PSBO_TOBAC Oxygen-evolving enhancer protein 1, chloroplastic OS=Nicotiana tabacum OX=4097 GN=PSBO PE=2 SV=1 && PF01716:Manganese-stabilising protein / photosystem II polypeptide	-
Niben261Chr13g1281009	6569.94	6608.31	6395.57	3861.13	3175.34	4507.4	6524.6	3847.95	0.761735	2.03719e-16	2.24823e-14	Niben261Chr13g1281009	Niben261Chr13	128113540	128116013	-	1284	protein_coding	- && sp|P27522|CB13_SOLLC Chlorophyll a-b binding protein 8, chloroplastic OS=Solanum lycopersicum OX=4081 GN=CAB8 PE=3 SV=1 && PF00504:Chlorophyll A-B binding protein	-
Niben261Chr18g0349002	584.33	573.237	541.997	313.457	284.591	319.769	566.521	305.939	0.88894	2.48762e-16	2.73769e-14	Niben261Chr18g0349002	Niben261Chr18	34820936	34830150	-	1533	protein_coding	- && sp|Q9W133|ADCK_DROME AarF domain-containing kinase 1 OS=Drosophila melanogaster OX=7227 GN=Adck1 PE=1 SV=2 && PF03109:ABC1 family	ABC1
Niben261Chr06g0429003	3232.66	3165.56	3321.15	2310.29	2253.34	2308.27	3239.79	2290.63	0.500226	2.55063e-16	2.79926e-14	Niben261Chr06g0429003	Niben261Chr06	42897441	42900774	-	1365	protein_coding	- && sp|Q944I4|GLYK_ARATH D-glycerate 3-kinase, chloroplastic OS=Arabidopsis thaliana OX=3702 GN=GLYK PE=1 SV=2 && -	-
Niben261Chr01g1777003	2628.54	2679.91	2575.78	1757.87	1668.56	1890.85	2628.08	1772.43	0.568118	2.58577e-16	2.82999e-14	Niben261Chr01g1777003	Niben261Chr01	177686181	177690653	+	1179	protein_coding	- && sp|Q944G9|ALFP2_ARATH Fructose-bisphosphate aldolase 2, chloroplastic OS=Arabidopsis thaliana OX=3702 GN=FBA2 PE=1 SV=2 && PF00274:Fructose-bisphosphate aldolase class-I	-
Niben261Chr07g1509017	158.334	95.3547	100.14	328.936	314.805	307.323	117.943	317.021	-1.41889	2.74966e-16	3.00107e-14	Niben261Chr07g1509017	Niben261Chr07	150896848	150899156	+	1251	protein_coding	- && sp|Q9FKS8|LHT1_ARATH Lysine histidine transporter 1 OS=Arabidopsis thaliana OX=3702 GN=LHT1 PE=1 SV=1 && PF01490:Transmembrane amino acid transporter protein	Aa_trans
Niben261Scf08717g0000002	213.94	188.492	192.022	497.274	377.181	420.295	198.151	431.583	-1.12132	2.85038e-16	3.10245e-14	Niben261Scf08717g0000002	Niben261Scf08717	1132	2502	+	879	protein_coding	- && sp|Q9SMM5|SWT11_ARATH Bidirectional sugar transporter SWEET11 OS=Arabidopsis thaliana OX=3702 GN=SWEET11 PE=1 SV=1 && PF03083:Sugar efflux transporter for intercellular exchange	-
Niben261Chr06g1085007	9894.02	9954.59	9664.07	6272.03	5718.14	7234.05	9837.56	6408.07	0.618368	2.91871e-16	3.16812e-14	Niben261Chr06g1085007	Niben261Chr06	108478791	108480185	-	1395	protein_coding	- && sp|Q9ZS34|CHLP_TOBAC Geranylgeranyl diphosphate reductase, chloroplastic OS=Nicotiana tabacum OX=4097 GN=CHLP PE=2 SV=1 && -	-
Niben261Chr17g0030015	2485.29	2458.16	2524.16	1482.15	1283.58	1723.3	2489.2	1496.34	0.734129	2.98755e-16	3.23398e-14	Niben261Chr17g0030015	Niben261Chr17	3073139	3078768	-	1128	protein_coding	- && - && PF09439:Signal recognition particle receptor beta subunit	-
Niben261Chr08g0978013	323.266	210.667	217.831	573.703	652.026	514.119	250.588	579.949	-1.20616	3.47395e-16	3.7487e-14	Niben261Chr08g0978013	Niben261Chr08	97820466	97824954	+	1032	protein_coding	- && sp|H6U1I8|GLIP_TANCI GDSL lipase OS=Tanacetum cinerariifolium OX=118510 GN=GLIP PE=1 SV=1 && PF00657:GDSL-like Lipase/Acylhydrolase	Lipase_GDSL
Niben261Chr11g1078010	437.305	416.9	440.825	822.34	789.448	689.322	431.676	767.037	-0.828711	3.48622e-16	3.7487e-14	Niben261Chr11g1078010	Niben261Chr11	107813241	107821387	+	1371	protein_coding	- && sp|P16273|PRPX_HORVU Pathogen-related protein OS=Hordeum vulgare OX=4513 PE=2 SV=2 && -	-
Niben261Chr05g0076005	964.144	807.189	1021.02	510.818	539.944	413.593	930.784	488.118	0.93221	3.49143e-16	3.7487e-14	Niben261Chr05g0076005	Niben261Chr05	7622288	7630843	-	1851	protein_coding	- && sp|O82161|PHI1_TOBAC Protein PHOSPHATE-INDUCED 1 OS=Nicotiana tabacum OX=4097 GN=PHI-1 PE=2 SV=1 && PF04674:Phosphate-induced protein 1 conserved region	-
Niben261Chr17g1344002	432.592	406.921	434.63	720.756	829.408	711.342	424.715	753.835	-0.826953	3.75288e-16	4.01852e-14	Niben261Chr17g1344002	Niben261Chr17	134422645	134428175	-	1746	protein_coding	- && sp|C8YNG6|KAT1_PETHY 3-ketoacyl CoA thiolase 1, peroxisomal OS=Petunia hybrida OX=4102 GN=KAT1 PE=1 SV=1 && PF02803:Thiolase, C-terminal domain|PF00108:Thiolase, N-terminal domain	Thiolase_N
Niben261Chr15g1231007	360.022	322.654	303.519	669.481	691.986	550.5	328.732	637.322	-0.953567	4.31426e-16	4.60719e-14	Niben261Chr15g1231007	Niben261Chr15	123156446	123158333	+	1245	protein_coding	- && sp|Q9FLS0|FB253_ARATH F-box protein At5g07610 OS=Arabidopsis thaliana OX=3702 GN=At5g07610 PE=2 SV=1 && -	-
Niben261Chr15g1181003	283.683	236.169	247.77	580.475	514.603	463.377	255.874	519.485	-1.01918	4.35217e-16	4.63518e-14	Niben261Chr15g1181003	Niben261Chr15	118098965	118099426	+	462	protein_coding	- && sp|Q9ZQE6|CML30_ARATH Calmodulin-like protein 30 OS=Arabidopsis thaliana OX=3702 GN=CML30 PE=2 SV=1 && PF00036:EF hand|PF13499:EF-hand domain pair	efhand
novel.2245	123.463	106.443	76.3958	283.465	248.53	293.919	102.101	275.305	-1.42818	4.46656e-16	4.74426e-14	-	Niben261Chr06	28310871	28312844	-	1816	-	- && Q94FM7.2 RecName: Full=5-epiaristolochene 1,3-dihydroxylase; Short=NtEAH; AltName: Full=Cytochrome P450 71D20 && PF00067:Cytochrome P450	p450
novel.244	330.806	319.328	216.799	610.466	622.787	596.455	288.977	609.903	-1.07694	4.98219e-16	5.27779e-14	-	Niben261Chr01	17452446	17453339	-	708	-	- && - && -	-
Niben261Chr13g0918004	199.803	196.253	212.669	404.398	437.608	390.616	202.909	410.874	-1.01756	5.11302e-16	5.40194e-14	Niben261Chr13g0918004	Niben261Chr13	91872518	91873757	-	714	protein_coding	- && sp|Q1G3Q4|RITF1_ARATH Protein RGF1 INDUCIBLE TRANSCRIPTION FACTOR 1 OS=Arabidopsis thaliana OX=3702 GN=RITF1 PE=1 SV=1 && PF04640:PLATZ transcription factor	-
Niben261Chr10g0943002	2114.9	2336.19	2149.41	1404.75	1313.8	1537.57	2200.16	1418.71	0.632514	5.23672e-16	5.51792e-14	Niben261Chr10g0943002	Niben261Chr10	94376087	94378136	-	930	protein_coding	- && sp|O49814|BCH2_CAPAN Beta-carotene hydroxylase 2, chloroplastic OS=Capsicum annuum OX=4072 GN=CA2 PE=1 SV=2 && PF04116:Fatty acid hydroxylase superfamily	-
Niben261Chr08g0850010	1456.11	1656.51	1502.11	2394.46	2202.66	2497.83	1538.24	2364.98	-0.621361	5.73171e-16	6.01251e-14	Niben261Chr08g0850010	Niben261Chr08	85057078	85058950	-	747	protein_coding	- && sp|Q8RX97|FRI1_TOBAC Ferritin-1, chloroplastic OS=Nicotiana tabacum OX=4097 GN=FER1 PE=2 SV=1 && PF00210:Ferritin-like domain	Ferritin
Niben261Chr19g1304003	43.3535	58.7651	42.3274	168.338	184.205	142.651	48.1487	165.065	-1.78321	5.73647e-16	6.01251e-14	Niben261Chr19g1304003	Niben261Chr19	130414103	130423206	+	2025	protein_coding	- && sp|F8WKW8|UGT9_GARJA Beta-D-glucosyl crocetin beta-1,6-glucosyltransferase OS=Gardenia jasminoides OX=114476 GN=UGT94E5 PE=1 SV=1 && PF00201:UDP-glucoronosyl and UDP-glucosyl transferase	UDPGT
Niben261Chr01g0704004	1253.48	1081.06	1194.46	1938.79	2219.23	1748.2	1176.33	1968.74	-0.742103	6.37741e-16	6.66666e-14	Niben261Chr01g0704004	Niben261Chr01	70463787	70466491	-	2112	protein_coding	- && - && -	-
Niben261Scf01723g0000004	13189.8	13088	12943.9	8808.71	7411.07	9419.77	13073.9	8546.52	0.613263	6.66929e-16	6.95343e-14	Niben261Scf01723g0000004	Niben261Scf01723	3	1698	+	618	protein_coding	- && sp|P12360|CB11_SOLLC Chlorophyll a-b binding protein 6A, chloroplastic OS=Solanum lycopersicum OX=4081 GN=CAB6A PE=2 SV=1 && PF00504:Chlorophyll A-B binding protein	-
Niben261Chr19g0661007	3055.48	2044.58	2916.46	8782.59	12089.3	8806.08	2672.17	9892.65	-1.8882	6.70715e-16	6.97456e-14	Niben261Chr19g0661007	Niben261Chr19	66149719	66152483	+	1362	protein_coding	- && sp|P49319|CATA1_TOBAC Catalase isozyme 1 OS=Nicotiana tabacum OX=4097 GN=CAT-1 PE=1 SV=2 && PF06628:Catalase-related immune-responsive|PF00199:Catalase	Catalase
Niben261Chr05g0827010	261.063	238.387	160.018	470.185	497.06	537.096	219.823	501.447	-1.18841	7.17095e-16	7.43732e-14	Niben261Chr05g0827010	Niben261Chr05	82647299	82651132	+	1407	protein_coding	- && sp|Q9M6N7|AMT2_ARATH Ammonium transporter 2 OS=Arabidopsis thaliana OX=3702 GN=AMT2 PE=1 SV=2 && PF00909:Ammonium Transporter Family	Ammonium_transp
Niben261Chr13g1069004	599.409	634.22	474.893	1176.43	1245.57	922.925	569.507	1114.98	-0.969408	7.43958e-16	7.69579e-14	Niben261Chr13g1069004	Niben261Chr13	106901478	106903104	-	876	protein_coding	- && sp|Q5GI04|HIR1_CAPAN Hypersensitive-induced reaction 1 protein OS=Capsicum annuum OX=4072 GN=HIR1 PE=1 SV=1 && PF01145:SPFH domain / Band 7 family	-
Niben261Chr06g0053002	187.551	156.337	169.31	385.048	405.445	331.257	171.066	373.917	-1.12527	8.2003e-16	8.46062e-14	Niben261Chr06g0053002	Niben261Chr06	5381388	5382464	-	1077	protein_coding	- && sp|Q9LZL3|PCS1L_ARATH Aspartic proteinase PCS1 OS=Arabidopsis thaliana OX=3702 GN=PCS1 PE=2 SV=1 && PF14543:Xylanase inhibitor N-terminal|PF14541:Xylanase inhibitor C-terminal	-
Niben261Chr10g1105003	483.486	503.384	455.278	785.576	904.454	796.549	480.716	828.86	-0.786254	9.77284e-16	1.00569e-13	Niben261Chr10g1105003	Niben261Chr10	110500330	110503551	+	1717	protein_coding	- && sp|Q9M390|PTR1_ARATH Protein NRT1/ PTR FAMILY 8.1 OS=Arabidopsis thaliana OX=3702 GN=NPF8.1 PE=1 SV=1 && PF00854:POT family	-
Niben261Chr16g0378005	74.4549	45.4598	37.1655	237.995	188.103	162.756	52.3601	196.285	-1.89696	1.03079e-15	1.05801e-13	Niben261Chr16g0378005	Niben261Chr16	37790020	37791452	-	534	protein_coding	- && sp|Q9S763|WRK45_ARATH Probable WRKY transcription factor 45 OS=Arabidopsis thaliana OX=3702 GN=WRKY45 PE=1 SV=1 && PF03106:WRKY DNA -binding domain	WRKY
Niben261Chr04g1112005	894.401	1126.52	1027.21	1815.92	1539.91	1773.09	1016.04	1709.64	-0.752159	1.05083e-15	1.07579e-13	Niben261Chr04g1112005	Niben261Chr04	111243668	111250384	+	1572	protein_coding	- && sp|Q94AR8|LEUC_ARATH 3-isopropylmalate dehydratase large subunit, chloroplastic OS=Arabidopsis thaliana OX=3702 GN=IIL1 PE=1 SV=1 && PF00330:Aconitase family (aconitate hydratase)	Aconitase
Niben261Chr14g1147007	360.965	307.131	265.321	683.993	793.347	546.67	311.139	674.67	-1.11483	1.08433e-15	1.10722e-13	Niben261Chr14g1147007	Niben261Chr14	114698965	114700201	+	1023	protein_coding	- && sp|Q8S9J6|ASPA_ARATH Aspartyl protease family protein At5g10770 OS=Arabidopsis thaliana OX=3702 GN=At5g10770 PE=2 SV=1 && PF14541:Xylanase inhibitor C-terminal|PF14543:Xylanase inhibitor N-terminal	-
Niben261Chr02g0819010	797.327	720.704	718.534	1314.78	1397.62	1108.66	745.522	1273.68	-0.771753	1.22723e-15	1.24992e-13	Niben261Chr02g0819010	Niben261Chr02	81944770	81948713	-	1179	protein_coding	- && sp|O64511|TLOV1_ARATH Protein TWIN LOV 1 OS=Arabidopsis thaliana OX=3702 GN=TLP1 PE=1 SV=2 && PF13426:PAS domain	-
Niben261Chr01g0015010	808.637	741.771	646.267	1427	1476.56	1120.15	732.225	1341.24	-0.872474	1.28121e-15	1.30154e-13	Niben261Chr01g0015010	Niben261Chr01	1558018	1578033	-	2532	protein_coding	- && sp|Q9LFH9|LRK81_ARATH L-type lectin-domain containing receptor kinase VIII.1 OS=Arabidopsis thaliana OX=3702 GN=LECRK81 PE=2 SV=1 && PF00139:Legume lectin domain|PF00141:Peroxidase|PF00069:Protein kinase domain	Pkinase
Niben261Chr05g0600010	524.012	526.669	531.674	925.858	962.932	806.123	527.451	898.304	-0.768096	1.2851e-15	1.30216e-13	Niben261Chr05g0600010	Niben261Chr05	60082429	60086057	-	762	protein_coding	- && sp|H9BFQ2|TPRL3_ERYCB Tropinone reductase-like 3 OS=Erythroxylum coca OX=289672 PE=2 SV=1 && PF13561:Enoyl-(Acyl carrier protein) reductase	-
Niben261Chr08g0120022	864.242	870.389	845.516	551.451	472.694	516.034	860.049	513.393	0.744224	1.32547e-15	1.33964e-13	Niben261Chr08g0120022	Niben261Chr08	12014444	12015932	+	423	protein_coding	- && sp|P93092|ACP1_CASGL Acyl carrier protein 1, chloroplastic OS=Casuarina glauca OX=3522 GN=ACP1 PE=2 SV=1 && PF00550:Phosphopantetheine attachment site	PP-binding
Niben261Chr08g0046003	71.6275	77.6143	67.1045	204.134	191.027	199.137	72.1154	198.099	-1.45933	1.37535e-15	1.38652e-13	Niben261Chr08g0046003	Niben261Chr08	4685843	4687270	-	807	protein_coding	- && sp|Q9FZ62|PPSP2_ARATH Inorganic pyrophosphatase 2 OS=Arabidopsis thaliana OX=3702 GN=At1g17710 PE=2 SV=1 && PF06888:Putative Phosphatase	-
Niben261Chr14g0287002	1452.34	1410.36	1444.29	2259.98	2459.96	2007.65	1435.67	2242.53	-0.643158	1.38958e-15	1.3973e-13	Niben261Chr14g0287002	Niben261Chr14	28712309	28724528	-	1122	protein_coding	- && sp|O04153|CALR3_ARATH Calreticulin-3 OS=Arabidopsis thaliana OX=3702 GN=CRT3 PE=1 SV=2 && PF00262:Calreticulin family	-
Niben261Chr06g1227001	4720.82	4540.44	4433.02	6659.02	7588.45	6240.27	4564.76	6829.25	-0.581062	1.66949e-15	1.67452e-13	Niben261Chr06g1227001	Niben261Chr06	122767925	122772868	+	2247	protein_coding	- && sp|P35016|ENPL_CATRO Endoplasmin homolog OS=Catharanthus roseus OX=4058 GN=HSP90 PE=2 SV=1 && PF02518:Histidine kinase-, DNA gyrase B-, and HSP90-like ATPase|PF00183:Hsp90 protein	HATPase_c
Niben261Chr09g0105009	41.4685	45.4598	32.0037	163.5	141.321	128.29	39.644	144.371	-1.86607	1.84413e-15	1.84502e-13	Niben261Chr09g0105009	Niben261Chr09	10495570	10498519	-	1452	protein_coding	- && sp|Q9FG87|KCS20_ARATH 3-ketoacyl-CoA synthase 20 OS=Arabidopsis thaliana OX=3702 GN=KCS20 PE=2 SV=1 && PF08392:FAE1/Type III polyketide synthase-like protein|PF08541:3-Oxoacyl-[acyl-carrier-protein (ACP)] synthase III C terminal	-
Niben261Chr05g0412008	414.685	369.222	479.023	181.882	206.621	210.626	420.977	199.71	1.07653	2.10433e-15	2.10004e-13	Niben261Chr05g0412008	Niben261Chr05	41175246	41176400	+	1155	protein_coding	- && sp|Q9CAK4|ROH1_ARATH Protein ROH1 OS=Arabidopsis thaliana OX=3702 GN=ROH1 PE=1 SV=1 && PF05633:Protein BYPASS1-related	-
Niben261Chr05g0846008	105.556	77.6143	46.4569	241.865	269.972	227.859	76.5425	246.565	-1.68182	2.25976e-15	2.24948e-13	Niben261Chr05g0846008	Niben261Chr05	84613908	84620666	-	666	protein_coding	- && sp|Q03662|GSTX1_TOBAC Probable glutathione S-transferase OS=Nicotiana tabacum OX=4097 PE=2 SV=1 && PF00043:Glutathione S-transferase, C-terminal domain|PF02798:Glutathione S-transferase, N-terminal domain	GST_N
Niben261Chr07g0101017	603.179	664.157	719.566	1032.28	1164.68	1098.13	662.301	1098.36	-0.730706	2.28678e-15	2.27068e-13	Niben261Chr07g0101017	Niben261Chr07	10167410	10169979	+	951	protein_coding	- && sp|Q9XEE2|ANXD2_ARATH Annexin D2 OS=Arabidopsis thaliana OX=3702 GN=ANN2 PE=1 SV=1 && PF00191:Annexin	-
Niben261Chr12g0148003	1411.82	1323.88	1289.44	2035.53	2197.79	1910	1341.71	2047.77	-0.609444	2.32345e-15	2.30132e-13	Niben261Chr12g0148003	Niben261Chr12	14871159	14875190	-	3141	protein_coding	- && sp|Q9LK64|AB3C_ARATH ABC transporter C family member 3 OS=Arabidopsis thaliana OX=3702 GN=ABCC3 PE=1 SV=1 && PF00005:ABC transporter|PF00664:ABC transporter transmembrane region	ABC_tran
Niben261Scf01608g0000028	622.971	538.865	419.145	987.775	964.881	1026.32	526.994	992.993	-0.912674	2.35698e-15	2.32871e-13	Niben261Scf01608g0000028	Niben261Scf01608	61840	64894	-	1317	protein_coding	- && sp|P54873|HMCS_ARATH Hydroxymethylglutaryl-CoA synthase OS=Arabidopsis thaliana OX=3702 GN=HMGS PE=1 SV=2 && PF08540:Hydroxymethylglutaryl-coenzyme A synthase C terminal|PF01154:Hydroxymethylglutaryl-coenzyme A synthase N terminal	-
Niben261Chr03g1302010	213.94	195.145	224.026	418.909	392.775	498.801	211.037	436.828	-1.04867	2.84633e-15	2.80519e-13	Niben261Chr03g1302010	Niben261Chr03	130218992	130248471	+	2835	protein_coding	- && sp|P93231|VPS41_SOLLC Vacuolar protein sorting-associated protein 41 homolog OS=Solanum lycopersicum OX=4081 GN=VPS41 PE=2 SV=1 && PF00637:Region in Clathrin and VPS	-
Niben261Chr19g0476003	31.1014	54.33	35.1008	159.631	125.727	170.416	40.1774	151.924	-1.92989	2.8959e-15	2.84697e-13	Niben261Chr19g0476003	Niben261Chr19	47659378	47667729	-	1086	protein_coding	- && sp|Q9M439|BCAT2_ARATH Branched-chain-amino-acid aminotransferase 2, chloroplastic OS=Arabidopsis thaliana OX=3702 GN=BCAT2 PE=1 SV=1 && PF01063:Amino-transferase class IV	-
Niben261Chr15g0870003	4847.11	4695.67	4555.88	3493.49	3308.86	3385.33	4699.55	3395.9	0.46884	2.99778e-15	2.93983e-13	Niben261Chr15g0870003	Niben261Chr15	87032548	87039599	+	1170	protein_coding	- && sp|Q42967|DCUP_TOBAC Uroporphyrinogen decarboxylase, chloroplastic OS=Nicotiana tabacum OX=4097 GN=DCUP PE=1 SV=1 && PF01208:Uroporphyrinogen decarboxylase (URO-D)	-
Niben261Chr19g0815006	510.817	490.079	381.979	842.656	885.937	794.635	460.958	841.076	-0.86695	3.15554e-15	3.08122e-13	Niben261Chr19g0815006	Niben261Chr19	81519498	81522423	-	2589	protein_coding	- && sp|Q9C5S1|MKP1_ARATH Protein-tyrosine-phosphatase MKP1 OS=Arabidopsis thaliana OX=3702 GN=MKP1 PE=1 SV=1 && PF00626:Gelsolin repeat|PF00782:Dual specificity phosphatase, catalytic domain	DSPc
Niben261Chr05g0577030	298.762	304.913	301.454	575.638	573.081	506.46	301.71	551.726	-0.87095	3.15751e-15	3.08122e-13	Niben261Chr05g0577030	Niben261Chr05	57710914	57714198	-	918	protein_coding	- && sp|P93758|RMR42_ARATH Remorin 4.2 OS=Arabidopsis thaliana OX=3702 GN=REM4.2 PE=1 SV=1 && PF03763:Remorin, C-terminal region	-
Niben261Chr07g1203005	813.349	765.056	819.707	1267.37	1374.23	1180.46	799.37	1274.02	-0.671826	3.34074e-15	3.25201e-13	Niben261Chr07g1203005	Niben261Chr07	120325447	120328752	-	1089	protein_coding	- && sp|Q93VC9|CATB2_ARATH Cathepsin B-like protease 2 OS=Arabidopsis thaliana OX=3702 GN=CATHB2 PE=2 SV=1 && PF08127:Peptidase family C1 propeptide|PF00112:Papain family cysteine protease	Peptidase_C1
Niben261Chr02g0458008	1.88493	0	0	203.166	195.9	182.862	0.628311	193.976	-8.153	3.75661e-15	3.64787e-13	Niben261Chr02g0458008	Niben261Chr02	45810947	45816835	+	1524	protein_coding	- && sp|W8JWW3|CA225_CATRO Cytochrome P450 72A225 OS=Catharanthus roseus OX=4058 GN=CYP72A225 PE=2 SV=1 && PF00067:Cytochrome P450	p450
Niben261Scf03699g0000006	237.502	271.65	225.058	569.833	570.157	417.422	244.737	519.138	-1.08613	3.77293e-15	3.65037e-13	Niben261Scf03699g0000006	Niben261Scf03699	8924	10100	+	618	protein_coding	- && - && -	-
Niben261Chr12g1440006	512.702	526.669	588.454	930.695	1028.23	847.291	542.608	935.406	-0.785887	3.77761e-15	3.65037e-13	Niben261Chr12g1440006	Niben261Chr12	144000896	144005453	+	1119	protein_coding	- && sp|Q9FJN7|GCL1_ARATH LanC-like protein GCL1 OS=Arabidopsis thaliana OX=3702 GN=GCL1 PE=2 SV=1 && PF05147:Lanthionine synthetase C-like protein	-
Niben261Chr04g1659007	220.537	179.622	168.277	442.128	436.633	357.107	189.479	411.956	-1.11731	3.94734e-15	3.8051e-13	Niben261Chr04g1659007	Niben261Chr04	165926959	165931131	+	1905	protein_coding	- && sp|Q9LVL5|WNK4_ARATH Probable serine/threonine-protein kinase WNK4 OS=Arabidopsis thaliana OX=3702 GN=WNK4 PE=1 SV=1 && PF00069:Protein kinase domain	Pkinase
Niben261Chr03g1182008	2910.34	3157.79	2786.38	2061.65	1905.4	2052.65	2951.51	2006.57	0.556383	3.99011e-15	3.83699e-13	Niben261Chr03g1182008	Niben261Chr03	118173333	118179118	-	1893	protein_coding	- && sp|Q9ZQC5|ICR2_ARATH Interactor of constitutive active ROPs 2, chloroplastic OS=Arabidopsis thaliana OX=3702 GN=ICR2 PE=1 SV=1 && -	-
Niben261Chr05g1379010	10712.1	10849.4	11179.6	8375.29	7925.67	7563.39	10913.7	7954.78	0.456233	4.02904e-15	3.86505e-13	Niben261Chr05g1379010	Niben261Chr05	137921351	137923093	-	468	protein_coding	- && sp|P49107|PSAN_ARATH Photosystem I reaction center subunit N, chloroplastic OS=Arabidopsis thaliana OX=3702 GN=PSAN PE=1 SV=2 && PF05479:Photosystem I reaction centre subunit N (PSAN or PSI-N)	-
Niben261Chr15g1218004	227.135	199.58	203.378	395.69	431.76	417.422	210.031	414.958	-0.980286	4.04966e-15	3.87545e-13	Niben261Chr15g1218004	Niben261Chr15	121855735	121858717	+	1434	protein_coding	- && sp|Q9C994|DTX14_ARATH Protein DETOXIFICATION 14 OS=Arabidopsis thaliana OX=3702 GN=DTX14 PE=1 SV=1 && PF01554:MatE	MatE
Niben261Chr19g0054002	719.102	638.655	662.786	184.785	178.357	98.6113	673.514	153.918	2.12996	4.08994e-15	3.90456e-13	Niben261Chr19g0054002	Niben261Chr19	5459582	5461087	+	1506	protein_coding	- && sp|Q9M2U3|ALPL_ARATH Protein ALP1-like OS=Arabidopsis thaliana OX=3702 GN=At3g55350 PE=2 SV=1 && PF13359:DDE superfamily endonuclease	-
Niben261Chr02g1023014	99.9015	106.443	79.493	241.865	280.693	219.243	95.279	247.267	-1.37643	4.42053e-15	4.21003e-13	Niben261Chr02g1023014	Niben261Chr02	102344671	102347166	-	1254	protein_coding	- && sp|Q9C6K9|LRL11_ARATH LEAF RUST 10 DISEASE-RESISTANCE LOCUS RECEPTOR-LIKE PROTEIN KINASE-like 1.1 OS=Arabidopsis thaliana OX=3702 GN=LRK10L-1.1 PE=2 SV=1 && PF07714:Protein tyrosine kinase	Pkinase_Tyr
Niben261Chr13g0994005	358.137	432.423	362.364	794.283	620.838	892.288	384.308	769.137	-1.00271	4.66138e-15	4.42876e-13	Niben261Chr13g0994005	Niben261Chr13	99394254	99397212	-	1968	protein_coding	- && sp|P09114|ILVB2_TOBAC Acetolactate synthase 2, chloroplastic OS=Nicotiana tabacum OX=4097 GN=ALS SURB PE=1 SV=1 && PF02775:Thiamine pyrophosphate enzyme, C-terminal TPP binding domain|PF00205:Thiamine pyrophosphate enzyme, central domain|PF02776:Thiamine pyrophosphate enzyme, N-terminal TPP binding domain	TPP_enzyme_N
Niben261Chr16g0350013	21610.8	20373.8	20988.2	13858.8	12601	15778.8	20990.9	14079.5	0.576178	4.78233e-15	4.53281e-13	Niben261Chr16g0350013	Niben261Chr16	35042499	35044242	-	687	protein_coding	- && sp|Q41932|PSBQ2_ARATH Oxygen-evolving enhancer protein 3-2, chloroplastic OS=Arabidopsis thaliana OX=3702 GN=PSBQ2 PE=1 SV=2 && PF05757:Oxygen evolving enhancer protein 3 (PsbQ)	-
Niben261Chr03g0844005	98.959	76.5056	87.752	226.385	237.809	212.541	87.7389	225.578	-1.35765	5.36635e-15	5.07421e-13	Niben261Chr03g0844005	Niben261Chr03	84446835	84449760	-	1941	protein_coding	- && sp|F4HQX1|JAL3_ARATH Jacalin-related lectin 3 OS=Arabidopsis thaliana OX=3702 GN=JAL3 PE=2 SV=1 && PF01419:Jacalin-like lectin domain	-
Niben261Chr01g0049003	1458.94	1425.89	1510.37	967.458	1011.66	896.118	1465.06	958.413	0.612484	5.78056e-15	5.45286e-13	Niben261Chr01g0049003	Niben261Chr01	4948019	4948546	+	528	protein_coding	- && sp|Q9LR64|PB27A_ARATH Photosystem II repair protein PSB27-H1, chloroplastic OS=Arabidopsis thaliana OX=3702 GN=PSB27-1 PE=1 SV=1 && PF13326:Photosystem II Pbs27	-
Niben261Chr05g1167001	259.178	239.496	247.77	523.395	588.675	421.252	248.815	511.107	-1.0374	6.16752e-15	5.80406e-13	Niben261Chr05g1167001	Niben261Chr05	116776603	116777862	+	711	protein_coding	- && sp|Q1G3Q4|RITF1_ARATH Protein RGF1 INDUCIBLE TRANSCRIPTION FACTOR 1 OS=Arabidopsis thaliana OX=3702 GN=RITF1 PE=1 SV=1 && PF04640:PLATZ transcription factor	-
novel.3379	1743.56	1807.31	1800.46	1189.01	1157.86	1272.37	1783.78	1206.41	0.563903	7.29238e-15	6.84637e-13	-	Niben261Chr09	86384359	86385711	-	954	-	- && O80361.1 RecName: Full=50S ribosomal protein L4, chloroplastic; AltName: Full=CL4; AltName: Full=R-protein L4; Flags: Precursor && PF00573:Ribosomal protein L4/L1 family	-
Niben261Chr09g1185023	2234.59	2040.15	2307.36	1344.77	1267.02	1554.8	2194.03	1388.86	0.659864	7.5034e-15	7.02783e-13	Niben261Chr09g1185023	Niben261Chr09	118402973	118404241	+	1269	protein_coding	- && sp|O22126|FLA8_ARATH Fasciclin-like arabinogalactan protein 8 OS=Arabidopsis thaliana OX=3702 GN=FLA8 PE=2 SV=1 && PF02469:Fasciclin domain	-
Niben261Chr13g0468001	54.6631	35.4808	27.8742	169.305	142.296	136.907	39.3394	149.503	-1.91623	7.5891e-15	7.09134e-13	Niben261Chr13g0468001	Niben261Chr13	46797392	46798502	-	660	protein_coding	- && sp|Q93V51|PSE1_ARATH Protein LEAD-SENSITIVE 1 OS=Arabidopsis thaliana OX=3702 GN=PSE1 PE=2 SV=1 && PF04970:Lecithin retinol acyltransferase	-
novel.1310	369.447	343.721	391.271	668.514	662.747	606.029	368.146	645.763	-0.809833	7.74833e-15	7.20655e-13	-	Niben261Chr04	82251819	82256571	+	1599	-	- && Q9ZVL3.1 RecName: Full=Nuclear transcription factor Y subunit C-3; Short=AtNF-YC-3 && -	-
Niben261Chr12g0370003	256.351	287.173	270.483	518.558	517.527	471.036	271.336	502.374	-0.8902	7.74878e-15	7.20655e-13	Niben261Chr12g0370003	Niben261Chr12	37070679	37073132	+	747	protein_coding	- && sp|Q7XKE9|CLC1_ORYSJ Clathrin light chain 1 OS=Oryza sativa subsp. japonica OX=39947 GN=Os04g0679100 PE=2 SV=1 && PF01086:Clathrin light chain	-
Niben261Chr16g0426009	421.283	304.913	368.558	670.449	678.341	684.535	364.918	677.775	-0.88982	8.26766e-15	7.67111e-13	Niben261Chr16g0426009	Niben261Chr16	42649536	42652507	+	855	protein_coding	- && sp|Q02283|HAT5_ARATH Homeobox-leucine zipper protein HAT5 OS=Arabidopsis thaliana OX=3702 GN=HAT5 PE=1 SV=1 && PF02183:Homeobox associated leucine zipper|PF00046:Homeodomain	Homeobox
Niben261Chr19g0739007	373.217	359.243	332.425	755.585	790.423	559.116	354.962	701.708	-0.982601	8.57583e-15	7.93846e-13	Niben261Chr19g0739007	Niben261Chr19	73965419	73972576	-	948	protein_coding	- && sp|Q9FUT0|GSTU9_ARATH Glutathione S-transferase U9 OS=Arabidopsis thaliana OX=3702 GN=GSTU9 PE=2 SV=1 && PF02798:Glutathione S-transferase, N-terminal domain	GST_N
novel.6585	16.9644	13.3053	24.777	108.355	110.133	79.4635	18.3489	99.3172	-2.4325	9.17343e-15	8.47185e-13	-	Niben261Chr18	63417237	63418823	-	1149	-	- && Q94KL8.1 RecName: Full=Secoisolariciresinol dehydrogenase && -	-
Niben261Chr14g0732009	316.669	338.177	379.914	655.937	619.863	584.009	344.92	619.936	-0.846712	9.81237e-15	9.04084e-13	Niben261Chr14g0732009	Niben261Chr14	73204073	73206311	+	468	protein_coding	- && sp|Q9SGZ8|FLZ6_ARATH FCS-Like Zinc finger 6 OS=Arabidopsis thaliana OX=3702 GN=FLZ6 PE=1 SV=1 && PF04570:zinc-finger of the FCS-type, C2-C2	-
Niben261Chr14g0311006	2330.72	2249.71	2193.8	1539.23	1363.5	1604.59	2258.08	1502.44	0.587853	1.02087e-14	9.3842e-13	Niben261Chr14g0311006	Niben261Chr14	31159192	31167755	+	1155	protein_coding	- && sp|Q42967|DCUP_TOBAC Uroporphyrinogen decarboxylase, chloroplastic OS=Nicotiana tabacum OX=4097 GN=DCUP PE=1 SV=1 && PF01208:Uroporphyrinogen decarboxylase (URO-D)	-
Niben261Chr07g1309023	82.9371	44.351	64.0073	425.682	563.335	307.323	63.7652	432.113	-2.75668	1.15413e-14	1.05846e-12	Niben261Chr07g1309023	Niben261Chr07	130973347	130974514	-	375	protein_coding	- && sp|B9DGG8|DRM1_ARATH Dormancy-associated protein 1 OS=Arabidopsis thaliana OX=3702 GN=DRM1 PE=1 SV=1 && PF05564:Dormancy/auxin associated protein	-
Niben261Chr19g1250003	1851.95	1638.77	1373.06	2606.33	2560.35	3042.59	1621.26	2736.42	-0.754709	1.17192e-14	1.07229e-12	Niben261Chr19g1250003	Niben261Chr19	125008546	125015899	-	4308	protein_coding	- && sp|Q76CU2|PDR1_TOBAC Pleiotropic drug resistance protein 1 OS=Nicotiana tabacum OX=4097 GN=PDR1 PE=2 SV=1 && PF14510:ABC-transporter N-terminal|PF08370:Plant PDR ABC transporter associated|PF01061:ABC-2 type transporter|PF00005:ABC transporter	ABC2_membrane
Niben261Chr07g1400002	3615.3	3595.76	3516.27	5682.85	5600.21	4692.17	3575.78	5325.08	-0.57449	1.21638e-14	1.11041e-12	Niben261Chr07g1400002	Niben261Chr07	140004784	140006953	-	966	protein_coding	- && sp|P80471|LIPC_SOLTU Light-induced protein, chloroplastic OS=Solanum tuberosum OX=4113 PE=1 SV=2 && PF04755:PAP_fibrillin	-
novel.5238	147.967	84.267	105.302	0	0	0	112.512	0	9.30944	1.29226e-14	1.17697e-12	-	Niben261Chr14	113172910	113175883	-	2974	-	- && - && -	-
Niben261Chr11g0533007	475.003	416.9	428.436	752.683	799.195	705.597	440.113	752.491	-0.772121	1.31399e-14	1.19401e-12	Niben261Chr11g0533007	Niben261Chr11	53284686	53288434	-	1167	protein_coding	- && - && PF02365:No apical meristem (NAM) protein	NAM
Niben261Chr04g0806009	1832.16	2051.24	1929.51	1252.86	1347.91	1314.5	1937.63	1305.09	0.569556	1.35165e-14	1.22542e-12	Niben261Chr04g0806009	Niben261Chr04	80636488	80638539	+	1593	protein_coding	- && sp|Q9M8K5|HIP32_ARATH Heavy metal-associated isoprenylated plant protein 32 OS=Arabidopsis thaliana OX=3702 GN=HIPP32 PE=2 SV=1 && PF00403:Heavy-metal-associated domain	HMA
Niben261Chr01g1478005	10947.7	10556.7	10662.4	8314.34	7892.54	7952.09	10722.2	8052.99	0.413077	1.3959e-14	1.26265e-12	Niben261Chr01g1478005	Niben261Chr01	147855035	147861245	+	813	protein_coding	- && sp|Q96291|BAS1A_ARATH 2-Cys peroxiredoxin BAS1, chloroplastic OS=Arabidopsis thaliana OX=3702 GN=BAS1 PE=1 SV=2 && PF10417:C-terminal domain of 1-Cys peroxiredoxin|PF00578:AhpC/TSA family	-
Niben261Chr03g0154010	203.573	185.166	176.536	444.063	387.902	347.533	188.425	393.166	-1.05958	1.48403e-14	1.33931e-12	Niben261Chr03g0154010	Niben261Chr03	15464852	15469674	-	1005	protein_coding	- && sp|Q94CH6|EXL3_ARATH GDSL esterase/lipase EXL3 OS=Arabidopsis thaliana OX=3702 GN=EXL3 PE=2 SV=1 && PF00657:GDSL-like Lipase/Acylhydrolase	Lipase_GDSL
Niben261Chr16g1008011	20701.3	21890.6	21161.6	15407.7	12944	15515.5	21251.2	14622.4	0.539317	1.57527e-14	1.41843e-12	Niben261Chr16g1008011	Niben261Chr16	100774272	100774706	+	435	protein_coding	- && sp|Q43517|FER1_SOLLC Ferredoxin-1, chloroplastic OS=Solanum lycopersicum OX=4081 GN=SEND33 PE=2 SV=1 && PF00111:2Fe-2S iron-sulfur cluster binding domain	Fer2
novel.305	0	0	0	106.42	112.082	119.674	0	112.725	-9.22293	1.6082e-14	1.44479e-12	-	Niben261Chr01	70158973	70161512	-	1146	-	- && - && -	-
novel.2612	510.817	490.079	419.145	839.754	939.541	754.424	473.347	844.573	-0.834673	1.6197e-14	1.45183e-12	-	Niben261Chr07	28842123	28846252	-	3466	-	- && C0LGX3.1 RecName: Full=LRR receptor-like serine/threonine-protein kinase HSL2; AltName: Full=Protein HAESA-LIKE2; Flags: Precursor && PF00069:Protein kinase domain	Pkinase
novel.6818	41007.7	40914.9	41826.7	30195.3	26676.5	31330.6	41249.8	29400.8	0.488522	1.71061e-14	1.52986e-12	-	Niben261Chr19	122095182	122108479	+	1359	-	- && P27495.1 RecName: Full=Chlorophyll a-b binding protein 40, chloroplastic; AltName: Full=LHCII type I CAB-40; Short=LHCP; Flags: Precursor && -	-
Niben261Chr11g1069009	1784.09	1640.99	1791.17	1179.33	1208.54	1099.08	1738.75	1162.32	0.581581	1.71612e-14	1.53133e-12	Niben261Chr11g1069009	Niben261Chr11	106925810	106927751	-	732	protein_coding	- && sp|Q8L9J7|SWET1_ARATH Bidirectional sugar transporter SWEET1 OS=Arabidopsis thaliana OX=3702 GN=SWEET1 PE=1 SV=1 && PF03083:Sugar efflux transporter for intercellular exchange	-
Niben261Chr13g0309003	1992.38	2025.73	2053.4	1435.71	1346.94	1434.17	2023.84	1405.61	0.525744	1.74472e-14	1.55335e-12	Niben261Chr13g0309003	Niben261Chr13	30903105	30907893	+	1563	protein_coding	- && sp|P55243|GLGL3_SOLTU Glucose-1-phosphate adenylyltransferase large subunit 3, chloroplastic/amyloplastic OS=Solanum tuberosum OX=4113 GN=AGPS3 PE=2 SV=1 && PF00483:Nucleotidyl transferase	-
Niben261Chr07g0695010	125.348	68.7441	84.6548	16.4468	17.5433	11.4887	92.9157	15.1596	2.62125	2.06812e-14	1.83715e-12	Niben261Chr07g0695010	Niben261Chr07	69513584	69517863	-	1137	protein_coding	- && - && -	-
Niben261Chr05g0362004	98.0166	121.965	93.9462	0	0	0	104.643	0	9.19955	2.2038e-14	1.95228e-12	Niben261Chr05g0362004	Niben261Chr05	36240333	36242500	+	348	protein_coding	- && - && -	-
Niben261Chr02g0091003	1180.91	1190.83	1237.82	822.34	758.26	782.188	1203.19	787.596	0.611223	2.20758e-14	1.95228e-12	Niben261Chr02g0091003	Niben261Chr02	9108269	9111028	-	1131	protein_coding	- && sp|Q9SLA8|FABI_ARATH Enoyl-[acyl-carrier-protein] reductase [NADH], chloroplastic OS=Arabidopsis thaliana OX=3702 GN=MOD1 PE=1 SV=1 && PF13561:Enoyl-(Acyl carrier protein) reductase	-
Niben261Chr06g1154012	123.463	135.271	94.9786	291.205	339.17	247.007	117.904	292.461	-1.3115	2.22133e-14	1.95808e-12	Niben261Chr06g1154012	Niben261Chr06	115402559	115405259	-	1413	protein_coding	- && sp|Q9LV33|BGL44_ARATH Beta-glucosidase 44 OS=Arabidopsis thaliana OX=3702 GN=BGLU44 PE=2 SV=1 && PF00232:Glycosyl hydrolase family 1	Glyco_hydro_1
Niben261Chr09g1046007	52.7781	39.9159	40.2627	142.216	161.788	135.95	44.3189	146.651	-1.72018	2.22402e-14	1.95808e-12	Niben261Chr09g1046007	Niben261Chr09	104568100	104568830	+	447	protein_coding	- && sp|P29063|PR4B_TOBAC Pathogenesis-related protein PR-4B OS=Nicotiana tabacum OX=4097 PE=2 SV=1 && PF00967:Barwin family	-
Niben261Chr17g0049007	559.825	501.167	544.062	927.793	936.617	809.953	535.018	891.454	-0.735327	2.27709e-14	2.00036e-12	Niben261Chr17g0049007	Niben261Chr17	4886179	4890506	+	1440	protein_coding	- && sp|Q5W727|SCP26_ORYSJ Serine carboxypeptidase-like 26 OS=Oryza sativa subsp. japonica OX=39947 GN=SCP26 PE=2 SV=1 && PF00450:Serine carboxypeptidase	Peptidase_S10
Niben261Chr02g0811008	520.242	584.325	555.418	923.923	933.693	845.376	553.328	900.997	-0.704593	2.31432e-14	2.02856e-12	Niben261Chr02g0811008	Niben261Chr02	81095647	81099232	-	501	protein_coding	- && sp|Q38879|TRXH2_ARATH Thioredoxin H2 OS=Arabidopsis thaliana OX=3702 GN=TRX2 PE=1 SV=2 && PF00085:Thioredoxin	-
Niben261Chr19g0811003	3005.53	3234.3	2943.3	2246.44	2082.78	2079.45	3061.04	2136.22	0.518682	2.32369e-14	2.03228e-12	Niben261Chr19g0811003	Niben261Chr19	81144190	81146897	+	1233	protein_coding	- && - && PF01852:START domain	START
novel.6016	0	0	0	106.42	106.234	112.972	0	108.542	-9.16836	2.36217e-14	2.06138e-12	-	Niben261Chr16	140698694	140701949	-	880	-	- && - && -	-
Niben261Scf09669g0000002	2542.78	2551.29	2414.73	3489.62	3756.22	3380.55	2502.93	3542.13	-0.500958	2.88976e-14	2.51625e-12	Niben261Scf09669g0000002	Niben261Scf09669	2564	7899	-	2286	protein_coding	- && sp|P35016|ENPL_CATRO Endoplasmin homolog OS=Catharanthus roseus OX=4058 GN=HSP90 PE=2 SV=1 && PF02518:Histidine kinase-, DNA gyrase B-, and HSP90-like ATPase|PF00183:Hsp90 protein	HATPase_c
Niben261Chr02g0477004	9023.18	8823.64	8597.63	6526.47	6087.52	6745.78	8814.82	6453.26	0.449922	3.07899e-14	2.67514e-12	Niben261Chr02g0477004	Niben261Chr02	47714618	47716449	-	804	protein_coding	- && sp|P27522|CB13_SOLLC Chlorophyll a-b binding protein 8, chloroplastic OS=Solanum lycopersicum OX=4081 GN=CAB8 PE=3 SV=1 && PF00504:Chlorophyll A-B binding protein	-
Niben261Chr11g0612013	2213.85	2208.68	2199.99	3093.93	2980.41	3378.63	2207.51	3150.99	-0.513425	3.21926e-14	2.79089e-12	Niben261Chr11g0612013	Niben261Chr11	61189022	61192706	+	1161	protein_coding	- && sp|Q9SUL1|RD19C_ARATH Probable cysteine protease RD19C OS=Arabidopsis thaliana OX=3702 GN=RD19C PE=2 SV=1 && PF00112:Papain family cysteine protease|PF08246:Cathepsin propeptide inhibitor domain (I29)	Peptidase_C1
Niben261Chr12g0792004	1742.62	1857.2	1686.9	1244.15	1173.45	1091.43	1762.24	1169.68	0.59104	3.24844e-14	2.81004e-12	Niben261Chr12g0792004	Niben261Chr12	79268253	79270300	-	645	protein_coding	- && sp|Q6QPJ6|PRXQ_POPJC Peroxiredoxin Q, chloroplastic OS=Populus jackii OX=640484 GN=PRXQ PE=1 SV=1 && PF00578:AhpC/TSA family	-
Niben261Chr16g0872006	5267.45	5297.73	4997.73	3953.03	3677.27	3653.4	5187.64	3761.24	0.463869	3.25796e-14	2.81213e-12	Niben261Chr16g0872006	Niben261Chr16	87208961	87211363	-	1224	protein_coding	- && sp|P25851|F16P1_ARATH Fructose-1,6-bisphosphatase 1, chloroplastic OS=Arabidopsis thaliana OX=3702 GN=CFBP1 PE=1 SV=2 && PF00316:Fructose-1-6-bisphosphatase, N-terminal domain	-
Niben261Chr08g0408007	1507.95	1442.52	1509.33	2200.97	2340.08	2035.41	1486.6	2192.15	-0.559981	3.28556e-14	2.8298e-12	Niben261Chr08g0408007	Niben261Chr08	40810850	40813148	-	1512	protein_coding	- && sp|Q03685|BIP5_TOBAC Luminal-binding protein 5 OS=Nicotiana tabacum OX=4097 GN=BIP5 PE=2 SV=1 && PF00012:Hsp70 protein	HSP70
novel.1502	186.608	194.036	225.058	82.234	80.8941	64.1452	201.901	75.7578	1.41418	3.29526e-14	2.83199e-12	-	Niben261Chr04	50850784	50851451	-	668	-	- && - && -	-
Niben261Chr19g0559010	752.089	762.838	734.019	319.261	333.323	483.482	749.649	378.689	0.984781	3.3071e-14	2.83602e-12	Niben261Chr19g0559010	Niben261Chr19	55837487	55838791	+	1305	protein_coding	- && sp|O04496|AED3_ARATH Aspartyl protease AED3 OS=Arabidopsis thaliana OX=3702 GN=AED3 PE=1 SV=1 && PF14541:Xylanase inhibitor C-terminal|PF14543:Xylanase inhibitor N-terminal	-
Niben261Chr13g0063026	159.277	130.836	156.921	308.619	346.967	304.45	149.011	320.012	-1.09969	3.64456e-14	3.11866e-12	Niben261Chr13g0063026	Niben261Chr13	6208295	6213197	-	1530	protein_coding	- && sp|Q9S7V4|HA22A_ARATH HVA22-like protein a OS=Arabidopsis thaliana OX=3702 GN=HVA22A PE=2 SV=1 && PF03134:TB2/DP1, HVA22 family|PF12874:Zinc-finger of C2H2 type	TB2_DP1_HVA22
Niben261Chr13g0630020	1866.08	1822.83	1793.24	1331.22	1133.49	1165.14	1827.38	1209.95	0.594949	3.6924e-14	3.15278e-12	Niben261Chr13g0630020	Niben261Chr13	63006119	63007345	-	426	protein_coding	- && sp|Q41228|PSAEA_NICSY Photosystem I reaction center subunit IV A, chloroplastic OS=Nicotiana sylvestris OX=4096 GN=PSAEA PE=1 SV=1 && PF02427:Photosystem I reaction centre subunit IV / PsaE	-
Niben261Chr05g0678016	291.222	286.064	244.673	562.093	522.4	467.207	273.987	517.234	-0.916224	3.76562e-14	3.20839e-12	Niben261Chr05g0678016	Niben261Chr05	67767456	67776926	-	1620	protein_coding	- && sp|Q9C598|NAC81_ARATH Protein ATAF2 OS=Arabidopsis thaliana OX=3702 GN=NAC081 PE=1 SV=1 && PF16987:KIX domain|PF02365:No apical meristem (NAM) protein	NAM
Niben261Chr03g1350005	84.822	83.1582	67.1045	9.67458	14.6194	13.4035	78.3616	12.5658	2.64112	3.87029e-14	3.2905e-12	Niben261Chr03g1350005	Niben261Chr03	135022677	135038667	-	3654	protein_coding	- && sp|Q2PCF1|PDR2_NICPL Pleiotropic drug resistance protein 2 OS=Nicotiana plumbaginifolia OX=4092 GN=PDR2 PE=2 SV=1 && PF00005:ABC transporter|PF08370:Plant PDR ABC transporter associated|PF14510:ABC-transporter N-terminal|PF01061:ABC-2 type transporter	ABC2_membrane
Niben261Chr14g1421010	241.272	249.475	230.22	445.998	435.659	449.974	240.322	443.877	-0.885672	4.00106e-14	3.39439e-12	Niben261Chr14g1421010	Niben261Chr14	142129430	142139704	+	1872	protein_coding	- && sp|Q9FNX5|DRP1E_ARATH Phragmoplastin DRP1E OS=Arabidopsis thaliana OX=3702 GN=DRP1E PE=1 SV=1 && PF00350:Dynamin family|PF01031:Dynamin central region|PF02212:Dynamin GTPase effector domain	-
Niben261Chr05g0331010	811.464	850.431	803.189	494.371	524.35	515.076	821.695	511.266	0.684151	4.02956e-14	3.40643e-12	Niben261Chr05g0331010	Niben261Chr05	33123627	33127227	+	864	protein_coding	- && sp|Q94AQ9|SGRL_ARATH Magnesium dechelatase SGRL, chloroplastic OS=Arabidopsis thaliana OX=3702 GN=SGRL PE=1 SV=1 && PF12638:Staygreen protein	-
Niben261Chr19g1134008	228.077	248.366	199.249	430.519	416.166	456.676	225.23	434.454	-0.948988	4.03245e-14	3.40643e-12	Niben261Chr19g1134008	Niben261Chr19	113375913	113386519	-	990	protein_coding	- && sp|Q8TP15|HTPX2_METAC Protease HtpX homolog 2 OS=Methanosarcina acetivorans (strain ATCC 35395 / DSM 2834 / JCM 12185 / C2A) OX=188937 GN=htpX2 PE=3 SV=1 && PF01435:Peptidase family M48	Peptidase_M48
Niben261Chr16g1177004	3603.99	3437.21	3354.19	2381.88	2151	2556.23	3465.13	2363.04	0.552344	4.08858e-14	3.4465e-12	Niben261Chr16g1177004	Niben261Chr16	117713737	117715822	+	438	protein_coding	- && sp|Q9SUI6|PSAH2_ARATH Photosystem I reaction center subunit VI-2, chloroplastic OS=Arabidopsis thaliana OX=3702 GN=PSAH2 PE=2 SV=1 && PF03244:Photosystem I reaction centre subunit VI	-
Niben261Chr19g1111001	2783.1	2774.16	2764.7	3839.84	3723.08	3730	2773.99	3764.31	-0.440401	4.58951e-14	3.86055e-12	Niben261Chr19g1111001	Niben261Chr19	111074301	111076190	-	858	protein_coding	- && sp|O80402|DCAM_NICSY S-adenosylmethionine decarboxylase proenzyme OS=Nicotiana sylvestris OX=4096 GN=SAMDC1 PE=2 SV=1 && PF01536:Adenosylmethionine decarboxylase|PF08132:S-adenosyl-l-methionine decarboxylase leader peptide	SAM_decarbox
Niben261Chr13g0319016	106.499	108.66	62.9749	239.93	279.718	231.689	92.7113	250.445	-1.43336	4.85794e-14	4.07769e-12	Niben261Chr13g0319016	Niben261Chr13	31969563	31977160	-	2058	protein_coding	- && sp|Q94AZ2|STP13_ARATH Sugar transport protein 13 OS=Arabidopsis thaliana OX=3702 GN=STP13 PE=1 SV=2 && PF00083:Sugar (and other) transporter	Sugar_tr
Niben261Chr04g0456001	12876.9	12896.2	12468	9966.76	9447.07	9590.19	12747	9668	0.398871	5.3994e-14	4.5226e-12	Niben261Chr04g0456001	Niben261Chr04	45599780	45606641	+	1164	protein_coding	- && sp|O81155|CYSKP_SOLTU Cysteine synthase, chloroplastic/chromoplastic OS=Solanum tuberosum OX=4113 PE=2 SV=1 && PF00291:Pyridoxal-phosphate dependent enzyme	PALP
Niben261Chr16g0262002	4003.6	3326.33	4171.83	6450.04	6917.91	5360.43	3833.92	6242.79	-0.703067	5.50041e-14	4.59748e-12	Niben261Chr16g0262002	Niben261Chr16	26161579	26162167	+	279	protein_coding	- && sp|B9DGG8|DRM1_ARATH Dormancy-associated protein 1 OS=Arabidopsis thaliana OX=3702 GN=DRM1 PE=1 SV=1 && -	-
Niben261Scf02947g0000001	8331.41	8067.46	8106.22	5527.09	5086.58	6243.15	8168.36	5618.94	0.539751	5.62626e-14	4.69277e-12	Niben261Scf02947g0000001	Niben261Scf02947	2575	7217	+	1686	protein_coding	- && sp|Q9LXV3|DIT1_ARATH Dicarboxylate transporter 1, chloroplastic OS=Arabidopsis thaliana OX=3702 GN=DIT1 PE=1 SV=1 && PF00939:Sodium:sulfate symporter transmembrane region	Na_sulph_symp
Niben261Chr07g1023002	15059.7	14206.7	14121.9	10886.8	9293.08	10528.4	14462.8	10236.1	0.498716	6.0712e-14	5.05325e-12	Niben261Chr07g1023002	Niben261Chr07	102237935	102239475	-	1002	protein_coding	- && sp|Q40459|PSBO_TOBAC Oxygen-evolving enhancer protein 1, chloroplastic OS=Nicotiana tabacum OX=4097 GN=PSBO PE=2 SV=1 && PF01716:Manganese-stabilising protein / photosystem II polypeptide	-
Niben261Chr17g0186005	1028.23	1118.76	1327.64	630.783	657.874	741.021	1158.21	676.559	0.775077	6.37649e-14	5.29623e-12	Niben261Chr17g0186005	Niben261Chr17	18674958	18680776	+	1410	protein_coding	- && sp|Q9M571|PEAMT_SPIOL Phosphoethanolamine N-methyltransferase OS=Spinacia oleracea OX=3562 GN=PEAMT PE=1 SV=1 && PF13649:Methyltransferase domain|PF08241:Methyltransferase domain	Methyltransf_11
Niben261Chr02g0106024	363.792	411.356	360.299	148.021	153.991	216.37	378.482	172.794	1.1298	7.66117e-14	6.34996e-12	Niben261Chr02g0106024	Niben261Chr02	10605438	10612502	-	2430	protein_coding	- && sp|A0A0P0VUY4|CMT1_ORYSJ DNA (cytosine-5)-methyltransferase CMT1 OS=Oryza sativa subsp. japonica OX=39947 GN=CMT1 PE=3 SV=1 && PF01426:BAH domain|PF00145:C-5 cytosine-specific DNA methylase	DNA_methylase
Niben261Chr01g1061005	8997.73	8877.97	9252.16	7028.58	6367.24	6089.96	9042.62	6495.26	0.477382	7.76755e-14	6.42469e-12	Niben261Chr01g1061005	Niben261Chr01	105526757	105528668	+	393	protein_coding	- && sp|Q9SUI5|PSAK_ARATH Photosystem I reaction center subunit psaK, chloroplastic OS=Arabidopsis thaliana OX=3702 GN=PSAK PE=2 SV=2 && PF01241:Photosystem I psaG / psaK	-
Niben261Chr15g0260005	915.135	999.007	910.556	624.978	579.903	570.605	941.566	591.829	0.669249	8.03346e-14	6.61735e-12	Niben261Chr15g0260005	Niben261Chr15	26000179	26003426	+	1530	protein_coding	- && sp|Q9SNV9|NRAM3_ARATH Metal transporter Nramp3 OS=Arabidopsis thaliana OX=3702 GN=NRAMP3 PE=1 SV=2 && PF01566:Natural resistance-associated macrophage protein	-
Niben261Chr18g1458009	297.82	269.433	277.709	594.019	715.377	455.718	281.654	588.371	-1.06164	8.03388e-14	6.61735e-12	Niben261Chr18g1458009	Niben261Chr18	145885436	145887306	-	483	protein_coding	- && sp|Q9SAG8|DNAJ8_ARATH Chaperone protein dnaJ 8, chloroplastic OS=Arabidopsis thaliana OX=3702 GN=ATJ8 PE=2 SV=1 && PF00226:DnaJ domain	DnaJ
Niben261Chr16g0274019	685.173	612.044	610.134	1047.76	1129.59	943.03	635.784	1040.13	-0.708941	8.64585e-14	7.10664e-12	Niben261Chr16g0274019	Niben261Chr16	27479573	27481160	+	762	protein_coding	- && sp|P24805|TSJT1_TOBAC Stem-specific protein TSJT1 OS=Nicotiana tabacum OX=4097 GN=TSJT1 PE=2 SV=1 && PF12481:Aluminium induced protein	-
Niben261Chr04g0070010	2039.5	2426	2141.15	1446.35	1156.88	1460.02	2202.22	1354.42	0.700679	9.25947e-14	7.59525e-12	Niben261Chr04g0070010	Niben261Chr04	7012456	7012842	-	387	protein_coding	- && - && -	-
Niben261Chr09g1369002	49.0083	68.7441	45.4246	173.175	151.067	164.671	54.3923	162.971	-1.58966	1.04162e-13	8.5264e-12	Niben261Chr09g1369002	Niben261Chr09	136847861	136850935	-	3075	protein_coding	- && sp|F4I2N7|RLK7_ARATH Receptor-like protein kinase 7 OS=Arabidopsis thaliana OX=3702 GN=RLK7 PE=1 SV=1 && PF07714:Protein tyrosine kinase|PF00069:Protein kinase domain|PF13855:Leucine rich repeat	Pkinase
Niben261Chr09g1111011	10192.8	10343.8	10835.8	7909.94	7426.66	8012.41	10457.5	7783	0.426089	1.04983e-13	8.57588e-12	Niben261Chr09g1111011	Niben261Chr09	111162729	111166346	+	510	protein_coding	- && sp|O04616|CUT1A_ARATH Protein CURVATURE THYLAKOID 1A, chloroplastic OS=Arabidopsis thaliana OX=3702 GN=CURT1A PE=1 SV=1 && PF14159:CAAD domains of cyanobacterial aminoacyl-tRNA synthetase	-
Niben261Chr08g1354016	53798.8	49623.3	51435	37860.5	34837.1	39842.8	51619.1	37513.5	0.460513	1.06007e-13	8.64179e-12	Niben261Chr08g1354016	Niben261Chr08	135458418	135461381	-	702	protein_coding	- && sp|Q9XF89|CB5_ARATH Chlorophyll a-b binding protein CP26, chloroplastic OS=Arabidopsis thaliana OX=3702 GN=LHCB5 PE=1 SV=1 && PF00504:Chlorophyll A-B binding protein	-
Niben261Chr03g0246002	2133.75	1435.87	1413.32	5662.53	7463.7	5392.98	1660.98	6173.07	-1.89373	1.10697e-13	9.00552e-12	Niben261Chr03g0246002	Niben261Chr03	24664077	24665223	-	684	protein_coding	- && sp|C0HJG8|BSP_BOSSE Basic secretory protease (Fragments) OS=Boswellia serrata OX=613112 PE=1 SV=1 && PF04450:Peptidase of plants and bacteria	-
Niben261Chr02g1328009	976.396	777.252	863.066	1375.73	1395.67	1358.54	872.238	1376.64	-0.656558	1.14422e-13	9.28954e-12	Niben261Chr02g1328009	Niben261Chr02	132802753	132819214	-	1800	protein_coding	- && sp|P49043|VPE_CITSI Vacuolar-processing enzyme OS=Citrus sinensis OX=2711 PE=2 SV=1 && PF01650:Peptidase C13 family|PF08576:Eukaryotic protein of unknown function (DUF1764)	-
novel.1824	115.923	136.379	79.493	280.563	291.414	251.794	110.599	274.59	-1.31402	1.16181e-13	9.41303e-12	-	Niben261Chr05	1900186	1941967	-	5845	-	- && O00370.1 RecName: Full=LINE-1 retrotransposable element ORF2 protein; Short=ORF2p; Includes: RecName: Full=Reverse transcriptase; Includes: RecName: Full=Endonuclease && -	-
Niben261Chr03g1677004	1085.72	1186.39	1230.59	1779.16	1668.56	1730.01	1167.57	1725.91	-0.56459	1.2301e-13	9.94595e-12	Niben261Chr03g1677004	Niben261Chr03	167754888	167759120	-	690	protein_coding	- && sp|Q8RX97|FRI1_TOBAC Ferritin-1, chloroplastic OS=Nicotiana tabacum OX=4097 GN=FER1 PE=2 SV=1 && PF00210:Ferritin-like domain	Ferritin
novel.3369	99.9015	88.7021	76.3958	0	0	0	88.3331	0	8.95786	1.24499e-13	1.00308e-11	-	Niben261Chr09	72491376	72496939	-	1616	-	- && Q9SZ06.1 RecName: Full=Ethylene-responsive transcription factor ERF109 && PF00847:AP2 domain	AP2
novel.96	402.433	371.44	370.623	671.416	620.838	635.708	381.499	642.654	-0.751273	1.24565e-13	1.00308e-11	-	Niben261Chr01	69037625	69040374	+	1849	-	- && Q9SRQ1.1 RecName: Full=Cytochrome P450 89A9 && PF00067:Cytochrome P450	p450
Niben261Chr07g0050003	3323.14	3466.03	3452.27	2565.7	2474.58	2343.69	3413.81	2461.32	0.471809	1.28364e-13	1.03158e-11	Niben261Chr07g0050003	Niben261Chr07	4958134	4972218	+	2541	protein_coding	- && sp|Q93Y08|AB1K8_ARATH Protein ACTIVITY OF BC1 COMPLEX KINASE 8, chloroplastic OS=Arabidopsis thaliana OX=3702 GN=ABC1K8 PE=2 SV=1 && PF03109:ABC1 family	ABC1
Niben261Chr14g1525011	278.97	288.282	237.447	493.404	568.208	462.42	268.233	508.011	-0.921487	1.34351e-13	1.0775e-11	Niben261Chr14g1525011	Niben261Chr14	152488678	152493166	+	2145	protein_coding	- && sp|Q6R3L0|YSL1_ARATH Metal-nicotianamine transporter YSL1 OS=Arabidopsis thaliana OX=3702 GN=YSL1 PE=2 SV=2 && PF03169:OPT oligopeptide transporter protein	OPT
Niben261Chr07g1128052	37105.9	34669.2	35727.4	28095	25873.4	24657.6	35834.2	26208.7	0.451323	1.3492e-13	1.07988e-11	Niben261Chr07g1128052	Niben261Chr07	112746073	112759032	-	495	protein_coding	- && sp|P26573|RBS_NICPL Ribulose bisphosphate carboxylase small subunit, chloroplastic OS=Nicotiana plumbaginifolia OX=4092 GN=RBCS PE=3 SV=1 && PF00101:Ribulose bisphosphate carboxylase, small chain|PF12338:Ribulose-1,5-bisphosphate carboxylase small subunit	-
Niben261Chr08g1019005	4946.07	5059.35	4907.92	3790.5	3607.1	3729.04	4971.11	3708.88	0.422496	1.36726e-13	1.09213e-11	Niben261Chr08g1019005	Niben261Chr08	101923279	101933917	+	2040	protein_coding	- && sp|F4K410|SVR3_ARATH Putative elongation factor TypA-like SVR3, chloroplastic OS=Arabidopsis thaliana OX=3702 GN=SVR3 PE=1 SV=1 && PF00009:Elongation factor Tu GTP binding domain|PF03144:Elongation factor Tu domain 2|PF00679:Elongation factor G C-terminus	GTP_EFTU
novel.7020	78.2248	54.33	45.4246	163.5	202.723	174.245	59.3264	180.156	-1.59508	1.40506e-13	1.12006e-11	-	Niben261Chr19	143026688	143029426	-	2739	-	- && - && -	-
Niben261Chr06g1477004	2331.66	2151.03	2125.66	1605.98	1450.25	1348.01	2202.78	1468.08	0.585801	1.45729e-13	1.15937e-11	Niben261Chr06g1477004	Niben261Chr06	147696986	147703174	+	1650	protein_coding	- && sp|Q5XF57|Y5576_ARATH Probable receptor-like serine/threonine-protein kinase At5g57670 OS=Arabidopsis thaliana OX=3702 GN=At5g57670 PE=2 SV=1 && PF00069:Protein kinase domain	Pkinase
novel.1256	18.8493	16.6316	19.6151	85.1363	94.5389	85.2078	18.3654	88.2943	-2.26253	1.54106e-13	1.22355e-11	-	Niben261Chr04	29795544	29810450	+	1921	-	- && - && -	-
Niben261Chr13g1359003	12300.1	12004.7	10731.6	8454.62	8052.37	8668.22	11678.8	8391.74	0.476876	1.54762e-13	1.2263e-11	Niben261Chr13g1359003	Niben261Chr13	135954448	135966738	-	5268	protein_coding	- && sp|F4JKH6|TSS_ARATH Protein TSS OS=Arabidopsis thaliana OX=3702 GN=TSS PE=1 SV=1 && PF12807:Translation initiation factor eIF3 subunit 135|PF15044:Mitochondrial function, CLU-N-term|PF13424:Tetratricopeptide repeat	-
Niben261Chr19g0257004	700.253	577.672	448.051	1600.18	1504.83	1410.24	575.326	1505.08	-1.38676	1.55277e-13	1.22793e-11	Niben261Chr19g0257004	Niben261Chr19	25673579	25675751	+	1383	protein_coding	- && sp|Q8GT20|BEBT_TOBAC Benzyl alcohol O-benzoyltransferase OS=Nicotiana tabacum OX=4097 GN=HSR201 PE=1 SV=1 && PF02458:Transferase family	-
Niben261Chr17g1400001	708.735	685.224	672.077	1027.44	1058.45	1059.83	688.679	1048.57	-0.606114	1.58202e-13	1.24857e-11	Niben261Chr17g1400001	Niben261Chr17	140040150	140046233	+	2199	protein_coding	- && sp|P0C7P8|LHWL1_ARATH Transcription factor EMB1444 OS=Arabidopsis thaliana OX=3702 GN=EMB1444 PE=2 SV=1 && PF14215:bHLH-MYC and R2R3-MYB transcription factors N-terminal	-
Niben261Chr10g0343001	1976.35	1983.6	2151.47	1194.81	1247.52	1487.79	2037.14	1310.04	0.636789	1.61399e-13	1.27126e-11	Niben261Chr10g0343001	Niben261Chr10	34292907	34295321	+	1317	protein_coding	- && sp|O04496|AED3_ARATH Aspartyl protease AED3 OS=Arabidopsis thaliana OX=3702 GN=AED3 PE=1 SV=1 && PF14541:Xylanase inhibitor C-terminal|PF14543:Xylanase inhibitor N-terminal	-
novel.237	80.1097	79.8319	75.3635	19.3492	11.6955	7.65913	78.435	12.9013	2.60511	1.66876e-13	1.3118e-11	-	Niben261Chr01	14514691	14516024	-	1334	-	- && - && -	-
Niben261Chr10g0150009	681.404	563.258	697.886	1054.53	1211.46	1007.18	647.516	1091.06	-0.751266	1.79989e-13	1.41208e-11	Niben261Chr10g0150009	Niben261Chr10	15048092	15049566	-	1281	protein_coding	- && - && PF04720:PDDEXK-like family of unknown function	-
Niben261Chr13g1081013	488.198	517.798	419.145	921.988	835.256	737.191	475.047	831.478	-0.807989	1.83095e-13	1.4336e-11	Niben261Chr13g1081013	Niben261Chr13	108160626	108163395	-	1824	protein_coding	- && sp|Q9XF23|EDS1L_ARATH Protein EDS1L OS=Arabidopsis thaliana OX=3702 GN=EDS1 PE=1 SV=1 && PF18117:Enhanced disease susceptibility 1 protein EP domain|PF01764:Lipase (class 3)	Lipase_3
Niben261Chr09g0306013	329.863	328.198	314.875	597.889	598.421	514.119	324.312	570.143	-0.813695	1.84616e-13	1.44266e-11	Niben261Chr09g0306013	Niben261Chr09	30608882	30609439	+	558	protein_coding	- && sp|Q9FIC9|GL115_ARATH Germin-like protein subfamily 1 member 15 OS=Arabidopsis thaliana OX=3702 GN=At5g39120 PE=2 SV=1 && PF00190:Cupin	-
Niben261Chr14g1255002	151.737	135.271	92.9139	284.433	352.815	284.345	126.641	307.198	-1.27621	1.95381e-13	1.52378e-11	Niben261Chr14g1255002	Niben261Chr14	125532584	125535034	-	1647	protein_coding	- && sp|Q84LF2|5EAS3_NICAT 5-epi-aristolochene synthase 3 OS=Nicotiana attenuata OX=49451 PE=1 SV=1 && PF03936:Terpene synthase family, metal binding domain|PF01397:Terpene synthase, N-terminal domain	-
Niben261Chr03g1073005	147.025	160.773	126.982	56.1126	41.909	36.3809	144.927	44.8008	1.69333	2.0041e-13	1.55993e-11	Niben261Chr03g1073005	Niben261Chr03	107297643	107299334	-	690	protein_coding	- && sp|Q9FIH9|CML37_ARATH Calcium-binding protein CML37 OS=Arabidopsis thaliana OX=3702 GN=CML37 PE=1 SV=1 && PF13833:EF-hand domain pair	-
Niben261Chr19g1336001	598.467	476.774	365.461	1330.26	1325.49	1328.86	480.234	1328.2	-1.46689	2.07671e-13	1.61328e-11	Niben261Chr19g1336001	Niben261Chr19	133660107	133662430	-	1647	protein_coding	- && sp|Q40577|5EAS_TOBAC 5-epi-aristolochene synthase OS=Nicotiana tabacum OX=4097 GN=EAS3 PE=1 SV=3 && PF03936:Terpene synthase family, metal binding domain|PF01397:Terpene synthase, N-terminal domain	-
Niben261Chr10g0105018	8556.66	8339.11	8580.08	6424.89	6092.4	6605.04	8491.95	6374.11	0.4139	2.1243e-13	1.64702e-11	Niben261Chr10g0105018	Niben261Chr10	10514716	10517727	+	1209	protein_coding	- && sp|Q9LYA9|CP41A_ARATH Chloroplast stem-loop binding protein of 41 kDa a, chloroplastic OS=Arabidopsis thaliana OX=3702 GN=CSP41A PE=1 SV=1 && PF01370:NAD dependent epimerase/dehydratase family	Epimerase
Niben261Chr14g1274002	236.559	303.805	248.803	521.46	458.075	501.673	263.056	493.736	-0.91159	2.18487e-13	1.69067e-11	Niben261Chr14g1274002	Niben261Chr14	127421346	127423834	+	1599	protein_coding	- && sp|Q9MAM3|KCS1_ARATH 3-ketoacyl-CoA synthase 1 OS=Arabidopsis thaliana OX=3702 GN=KCS1 PE=1 SV=1 && PF08392:FAE1/Type III polyketide synthase-like protein|PF08541:3-Oxoacyl-[acyl-carrier-protein (ACP)] synthase III C terminal	-
Niben261Chr03g0856010	7475.65	7551.87	7373.23	5707.04	4998.87	5556.7	7466.92	5420.87	0.461947	2.20356e-13	1.70181e-11	Niben261Chr03g0856010	Niben261Chr03	85562198	85575662	+	1326	protein_coding	- && sp|Q42961|PGKH_TOBAC Phosphoglycerate kinase, chloroplastic OS=Nicotiana tabacum OX=4097 PE=2 SV=1 && PF00162:Phosphoglycerate kinase	-
Niben261Chr03g1492001	80.1097	60.9827	58.8454	191.557	187.129	167.543	66.6459	182.076	-1.44438	2.21571e-13	1.70787e-11	Niben261Chr03g1492001	Niben261Chr03	149245105	149246872	+	546	protein_coding	- && sp|Q93WU9|WRK51_ARATH Probable WRKY transcription factor 51 OS=Arabidopsis thaliana OX=3702 GN=WRKY51 PE=1 SV=1 && PF03106:WRKY DNA -binding domain	WRKY
novel.3035	241.272	279.412	230.22	108.355	118.905	100.526	250.301	109.262	1.19479	2.27854e-13	1.75288e-11	-	Niben261Chr08	73240916	73242136	-	1071	-	- && - && -	-
Niben261Chr16g0426016	2106.41	2155.46	1964.61	1475.37	1407.36	1469.6	2075.5	1450.78	0.516495	2.2881e-13	1.75683e-11	Niben261Chr16g0426016	Niben261Chr16	42590712	42594098	-	1359	protein_coding	- && sp|O49939|TLP40_SPIOL Peptidyl-prolyl cis-trans isomerase, chloroplastic OS=Spinacia oleracea OX=3562 GN=TLP40 PE=1 SV=1 && PF00160:Cyclophilin type peptidyl-prolyl cis-trans isomerase/CLD	Pro_isomerase
Niben261Chr12g1572002	335.518	328.198	279.774	567.898	606.218	519.863	314.497	564.66	-0.843778	2.40311e-13	1.84157e-11	Niben261Chr12g1572002	Niben261Chr12	157231230	157232474	-	828	protein_coding	- && - && -	-
Niben261Chr06g0436010	9649.92	9399.1	9628.97	7440.72	6608.95	7117.24	9559.33	7055.64	0.43816	2.45409e-13	1.877e-11	Niben261Chr06g0436010	Niben261Chr06	43678193	43681175	+	438	protein_coding	- && sp|O04006|PSAH_BRACM Photosystem I reaction center subunit VI, chloroplastic OS=Brassica campestris OX=3711 GN=PSAH PE=2 SV=1 && PF03244:Photosystem I reaction centre subunit VI	-
Niben261Chr14g0292003	164.932	188.492	160.018	341.513	359.638	323.598	171.147	341.583	-0.998916	2.81795e-13	2.15114e-11	Niben261Chr14g0292003	Niben261Chr14	29180527	29182630	-	1305	protein_coding	- && sp|Q9SF86|PCRK1_ARATH Serine/threonine-protein kinase PCRK1 OS=Arabidopsis thaliana OX=3702 GN=PCRK1 PE=1 SV=1 && PF00069:Protein kinase domain	Pkinase
Niben261Chr01g1224027	1135.67	1095.47	998.308	1609.85	1577.92	1571.08	1076.48	1586.28	-0.558944	2.95478e-13	2.25126e-11	Niben261Chr01g1224027	Niben261Chr01	122459884	122462858	-	1596	protein_coding	- && sp|Q40287|UFOG5_MANES Anthocyanidin 3-O-glucosyltransferase 5 OS=Manihot esculenta OX=3983 GN=GT5 PE=2 SV=1 && PF00201:UDP-glucoronosyl and UDP-glucosyl transferase	UDPGT
Niben261Chr15g1258007	469.349	294.934	394.368	1267.37	1419.06	1019.62	386.217	1235.35	-1.67622	3.20966e-13	2.44076e-11	Niben261Chr15g1258007	Niben261Chr15	125822062	125824081	+	618	protein_coding	- && sp|I1LPE9|NAC6_SOYBN NAC domain-containing protein 6 OS=Glycine max OX=3847 GN=NAC6 PE=2 SV=1 && PF02365:No apical meristem (NAM) protein	NAM
Niben261Chr03g0002005	1989.55	2092.26	1996.62	1481.18	1362.53	1426.51	2026.14	1423.41	0.509072	3.36834e-13	2.55652e-11	Niben261Chr03g0002005	Niben261Chr03	270398	273421	+	657	protein_coding	- && sp|Q9MAP3|RK11_ARATH 50S ribosomal protein L11, chloroplastic OS=Arabidopsis thaliana OX=3702 GN=RPL11 PE=2 SV=1 && PF00298:Ribosomal protein L11, RNA binding domain|PF03946:Ribosomal protein L11, N-terminal domain	-
Niben261Chr06g0726006	60.3179	73.1792	46.4569	174.143	183.23	156.055	59.9847	171.142	-1.51578	3.4269e-13	2.59599e-11	Niben261Chr06g0726006	Niben261Chr06	72597106	72605506	-	1014	protein_coding	- && sp|Q9FLV0|DMR6_ARATH Protein DOWNY MILDEW RESISTANCE 6 OS=Arabidopsis thaliana OX=3702 GN=DMR6 PE=1 SV=1 && PF14226:non-haem dioxygenase in morphine synthesis N-terminal|PF03171:2OG-Fe(II) oxygenase superfamily	2OG-FeII_Oxy
Niben261Chr09g1060014	1666.28	1675.36	1761.23	1213.19	1152.98	1190.04	1700.96	1185.4	0.520886	3.47341e-13	2.62621e-11	Niben261Chr09g1060014	Niben261Chr09	105980512	105983631	-	750	protein_coding	- && sp|Q9FL44|MPH1_ARATH Protein MAINTENANCE OF PSII UNDER HIGH LIGHT 1 OS=Arabidopsis thaliana OX=3702 GN=MPH1 PE=1 SV=1 && -	-
Niben261Chr11g1069011	400.548	440.184	434.63	247.669	219.291	222.115	425.121	229.692	0.887263	3.7122e-13	2.8014e-11	Niben261Chr11g1069011	Niben261Chr11	106967481	106970262	-	624	protein_coding	- && sp|Q8L9J7|SWET1_ARATH Bidirectional sugar transporter SWEET1 OS=Arabidopsis thaliana OX=3702 GN=SWEET1 PE=1 SV=1 && PF03083:Sugar efflux transporter for intercellular exchange	-
Niben261Chr15g1100003	242.214	181.839	219.896	465.347	416.166	391.573	214.65	424.362	-0.979643	3.76316e-13	2.83446e-11	Niben261Chr15g1100003	Niben261Chr15	110045208	110045750	-	543	protein_coding	- && sp|Q9FYB5|DNJ11_ARATH Chaperone protein dnaJ 11, chloroplastic OS=Arabidopsis thaliana OX=3702 GN=ATJ11 PE=1 SV=2 && PF00226:DnaJ domain	DnaJ
Niben261Chr06g0669008	1250.65	1255.13	1346.22	887.159	857.672	852.078	1284	865.637	0.568766	3.85824e-13	2.90056e-11	Niben261Chr06g0669008	Niben261Chr06	66913929	66916245	-	495	protein_coding	- && sp|Q9FJP3|RK29_ARATH 50S ribosomal protein L29, chloroplastic OS=Arabidopsis thaliana OX=3702 GN=RPL29 PE=1 SV=1 && PF00831:Ribosomal L29 protein	-
Niben261Chr15g0837001	272.373	251.692	207.508	434.389	483.415	467.207	243.858	461.67	-0.919493	3.97759e-13	2.98462e-11	Niben261Chr15g0837001	Niben261Chr15	83695270	83763596	+	1632	protein_coding	- && sp|Q9FKH6|B561P_ARATH Cytochrome b561 and DOMON domain-containing protein At5g35735 OS=Arabidopsis thaliana OX=3702 GN=At5g35735 PE=2 SV=1 && PF04526:Protein of unknown function (DUF568)	-
Niben261Chr18g0110005	1948.08	2195.38	2000.75	1375.73	1304.05	1480.13	2048.07	1386.63	0.56204	4.01475e-13	3.00681e-11	Niben261Chr18g0110005	Niben261Chr18	11005120	11010792	-	1239	protein_coding	- && sp|P48627|FAD6C_BRANA Omega-6 fatty acid desaturase, chloroplastic OS=Brassica napus OX=3708 PE=1 SV=1 && PF00487:Fatty acid desaturase	-
Niben261Chr05g0076002	114.038	109.769	123.885	38.6983	29.2388	13.4035	115.897	27.1135	2.09735	4.02492e-13	3.00874e-11	Niben261Chr05g0076002	Niben261Chr05	7503772	7504685	+	885	protein_coding	- && sp|O82161|PHI1_TOBAC Protein PHOSPHATE-INDUCED 1 OS=Nicotiana tabacum OX=4097 GN=PHI-1 PE=2 SV=1 && PF04674:Phosphate-induced protein 1 conserved region	-
Niben261Chr19g0620002	101.786	66.5266	49.5541	212.841	231.961	195.308	72.6224	213.37	-1.54717	4.1356e-13	3.08565e-11	Niben261Chr19g0620002	Niben261Chr19	62070545	62072683	+	798	protein_coding	- && - && PF00650:CRAL/TRIO domain|PF03765:CRAL/TRIO, N-terminal domain	CRAL_TRIO_N
Niben261Chr16g0224012	42.411	39.9159	34.0684	108.355	149.118	135.95	38.7985	131.141	-1.7554	4.27816e-13	3.18602e-11	Niben261Chr16g0224012	Niben261Chr16	22467139	22477239	+	1011	protein_coding	- && sp|Q9FJ47|SAG12_ARATH Senescence-specific cysteine protease SAG12 OS=Arabidopsis thaliana OX=3702 GN=SAG12 PE=1 SV=1 && PF00112:Papain family cysteine protease|PF08246:Cathepsin propeptide inhibitor domain (I29)	Peptidase_C1
Niben261Chr17g0856014	982.993	1010.1	1047.86	661.742	691.011	631.878	1013.65	661.544	0.615517	4.54376e-13	3.37747e-11	Niben261Chr17g0856014	Niben261Chr17	85663383	85665480	+	1632	protein_coding	- && sp|Q9M8K5|HIP32_ARATH Heavy metal-associated isoprenylated plant protein 32 OS=Arabidopsis thaliana OX=3702 GN=HIPP32 PE=2 SV=1 && PF00403:Heavy-metal-associated domain	HMA
novel.6188	82.9371	70.9617	37.1655	187.687	234.885	179.99	63.6881	200.854	-1.6535	4.8567e-13	3.60333e-11	-	Niben261Chr17	138211252	138219939	+	6322	-	- && - && -	-
Niben261Chr16g0773013	818.061	847.105	839.322	1230.61	1320.62	1192.91	834.829	1248.05	-0.58039	4.95699e-13	3.67086e-11	Niben261Chr16g0773013	Niben261Chr16	77327079	77330907	-	738	protein_coding	- && - && PF05184:Saposin-like type B, region 1|PF03489:Saposin-like type B, region 2	-
Niben261Chr16g1024006	744.549	714.052	655.559	1175.46	1247.52	1006.22	704.72	1143.07	-0.697262	5.06365e-13	3.74285e-11	Niben261Chr16g1024006	Niben261Chr16	102469986	102475049	+	1797	protein_coding	- && sp|Q93VV5|PTR16_ARATH Protein NRT1/ PTR FAMILY 4.3 OS=Arabidopsis thaliana OX=3702 GN=NPF4.3 PE=2 SV=1 && PF00854:POT family	-
Niben261Chr12g0629011	42.411	28.8282	20.6475	103.518	118.905	141.694	30.6289	121.372	-1.97728	5.46967e-13	4.03544e-11	Niben261Chr12g0629011	Niben261Chr12	62867200	62871215	-	2253	protein_coding	- && sp|O81832|Y4729_ARATH G-type lectin S-receptor-like serine/threonine-protein kinase At4g27290 OS=Arabidopsis thaliana OX=3702 GN=At4g27290 PE=3 SV=4 && PF00069:Protein kinase domain|PF11883:Domain of unknown function (DUF3403)|PF08276:PAN-like domain|PF00954:S-locus glycoprotein domain|PF01453:D-mannose binding lectin	Pkinase
Niben261Chr07g0516001	3765.16	3850.78	3933.35	2971.06	2712.39	2650.06	3849.76	2777.84	0.470741	5.59363e-13	4.11922e-11	Niben261Chr07g0516001	Niben261Chr07	51603399	51606600	+	393	protein_coding	- && sp|Q9SUI5|PSAK_ARATH Photosystem I reaction center subunit psaK, chloroplastic OS=Arabidopsis thaliana OX=3702 GN=PSAK PE=2 SV=2 && PF01241:Photosystem I psaG / psaK	-
Niben261Chr07g1370015	200.745	187.383	170.342	374.406	342.094	366.681	186.157	361.06	-0.954541	5.69503e-13	4.18611e-11	Niben261Chr07g1370015	Niben261Chr07	136990348	136993641	-	1677	protein_coding	- && sp|Q9M0X5|CRK25_ARATH Cysteine-rich receptor-like protein kinase 25 OS=Arabidopsis thaliana OX=3702 GN=CRK25 PE=3 SV=1 && PF07714:Protein tyrosine kinase|PF01657:Salt stress response/antifungal	Pkinase_Tyr
Niben261Chr10g0289015	8957.21	8720.52	8770.04	6797.36	6511.49	6877.9	8815.92	6728.92	0.389781	5.72366e-13	4.19936e-11	Niben261Chr10g0289015	Niben261Chr10	28893937	28897399	-	441	protein_coding	- && sp|O04616|CUT1A_ARATH Protein CURVATURE THYLAKOID 1A, chloroplastic OS=Arabidopsis thaliana OX=3702 GN=CURT1A PE=1 SV=1 && PF14159:CAAD domains of cyanobacterial aminoacyl-tRNA synthetase	-
Niben261Chr18g1271016	236.559	221.755	340.684	584.345	584.777	481.568	266.333	550.23	-1.04644	5.96514e-13	4.36845e-11	Niben261Chr18g1271016	Niben261Chr18	127100043	127101468	-	855	protein_coding	- && - && -	-
Niben261Chr14g1356011	1589	1553.4	1566.11	1052.59	1121.8	1106.74	1569.5	1093.71	0.521241	6.48067e-13	4.73723e-11	Niben261Chr14g1356011	Niben261Chr14	135660054	135665243	-	3210	protein_coding	- && - && PF10358:N-terminal C2 in EEIG1 and EHBP1 proteins	-
Niben261Chr03g0218002	32.0439	33.2633	24.777	132.542	146.194	84.2504	30.0281	120.995	-2.01053	6.53802e-13	4.77034e-11	Niben261Chr03g0218002	Niben261Chr03	21837635	21838872	+	714	protein_coding	- && sp|Q1G3Q4|RITF1_ARATH Protein RGF1 INDUCIBLE TRANSCRIPTION FACTOR 1 OS=Arabidopsis thaliana OX=3702 GN=RITF1 PE=1 SV=1 && PF04640:PLATZ transcription factor	-
novel.3937	97.0741	118.639	144.533	0	0	1.91478	120.082	0.638261	7.54101	6.58178e-13	4.79345e-11	-	Niben261Chr11	72948570	72949203	+	634	-	- && - && -	-
Niben261Chr17g0569061	908.538	839.344	848.613	573.703	547.741	542.841	865.498	554.761	0.64237	7.11867e-13	5.17495e-11	Niben261Chr17g0569061	Niben261Chr17	56579399	56600494	-	267	protein_coding	- && sp|P27495|CB24_TOBAC Chlorophyll a-b binding protein 40, chloroplastic OS=Nicotiana tabacum OX=4097 GN=CAB40 PE=2 SV=1 && -	-
Niben261Chr09g1100007	2142.23	2165.44	1950.16	1486.02	1463.89	1441.83	2085.94	1463.91	0.510855	7.19008e-13	5.21728e-11	Niben261Chr09g1100007	Niben261Chr09	110037742	110041743	+	1326	protein_coding	- && sp|Q9M158|STR4_ARATH Rhodanese-like domain-containing protein 4, chloroplastic OS=Arabidopsis thaliana OX=3702 GN=STR4 PE=1 SV=2 && -	-
novel.855	147.967	143.032	119.756	45.4705	43.8582	45.9548	136.918	45.0945	1.60268	8.10458e-13	5.86014e-11	-	Niben261Chr03	74584291	74587443	+	2901	-	- && - && -	-
Niben261Chr09g1103005	606.949	582.107	457.343	1053.56	1185.15	833.888	548.8	1024.2	-0.899641	8.10559e-13	5.86014e-11	Niben261Chr09g1103005	Niben261Chr09	110289634	110292046	+	1038	protein_coding	- && sp|Q8H0Y8|WRK41_ARATH Probable WRKY transcription factor 41 OS=Arabidopsis thaliana OX=3702 GN=WRKY41 PE=1 SV=2 && PF03106:WRKY DNA -binding domain	WRKY
Niben261Chr04g1781003	129.118	118.639	107.367	241.865	256.327	278.601	118.375	258.931	-1.12766	8.66971e-13	6.25656e-11	Niben261Chr04g1781003	Niben261Chr04	178142331	178151020	-	1740	protein_coding	- && sp|Q9FNN2|WDR26_ARATH WD repeat-containing protein 26 homolog OS=Arabidopsis thaliana OX=3702 GN=WDR26 PE=1 SV=1 && PF00400:WD domain, G-beta repeat	WD40
Niben261Chr01g0693001	347.77	359.243	356.17	613.369	555.538	611.773	354.395	593.56	-0.744563	9.17676e-13	6.61044e-11	Niben261Chr01g0693001	Niben261Chr01	69264521	69268612	-	957	protein_coding	- && sp|Q9CW42|MARC1_MOUSE Mitochondrial amidoxime-reducing component 1 OS=Mus musculus OX=10090 GN=Mtarc1 PE=1 SV=2 && PF03476:MOSC N-terminal beta barrel domain|PF03473:MOSC domain	MOSC_N
Niben261Chr14g1021004	445.787	384.745	474.893	713.017	719.275	732.404	435.142	721.565	-0.728162	9.36319e-13	6.73249e-11	Niben261Chr14g1021004	Niben261Chr14	102141975	102150209	-	1437	protein_coding	- && sp|P49043|VPE_CITSI Vacuolar-processing enzyme OS=Citrus sinensis OX=2711 PE=2 SV=1 && PF01650:Peptidase C13 family	-
Niben261Chr11g0889004	122.521	104.225	145.565	37.7309	36.0612	37.3382	124.104	37.0435	1.74541	9.39089e-13	6.74018e-11	Niben261Chr11g0889004	Niben261Chr11	88983098	88984066	+	969	protein_coding	- && sp|O82161|PHI1_TOBAC Protein PHOSPHATE-INDUCED 1 OS=Nicotiana tabacum OX=4097 GN=PHI-1 PE=2 SV=1 && PF04674:Phosphate-induced protein 1 conserved region	-
Niben261Chr06g1397001	872.724	926.937	910.556	1436.68	1387.87	1248.44	903.406	1357.66	-0.588132	9.65194e-13	6.91501e-11	Niben261Chr06g1397001	Niben261Chr06	139738136	139739871	-	606	protein_coding	- && sp|Q6AVN2|SIRP1_ORYSJ E3 ubiquitin-protein ligase SIRP1 OS=Oryza sativa subsp. japonica OX=39947 GN=SIRP1 PE=1 SV=1 && PF13639:Ring finger domain	-
Niben261Chr01g1239019	3178	3177.75	3076.48	2074.23	1894.68	2386.78	3144.08	2118.56	0.569459	1.07465e-12	7.68527e-11	Niben261Chr01g1239019	Niben261Chr01	123938718	123940624	+	633	protein_coding	- && sp|P82278|RR9_SPIOL 30S ribosomal protein S9, chloroplastic OS=Spinacia oleracea OX=3562 GN=PRPS9 PE=1 SV=2 && PF00380:Ribosomal protein S9/S16	-
Niben261Chr18g0515004	1641.78	1623.25	1623.93	1145.47	1075.99	1184.29	1629.65	1135.25	0.521542	1.0859e-12	7.75173e-11	Niben261Chr18g0515004	Niben261Chr18	51481136	51482766	+	816	protein_coding	- && sp|Q9C639|LHCA5_ARATH Photosystem I chlorophyll a/b-binding protein 5, chloroplastic OS=Arabidopsis thaliana OX=3702 GN=LHCA5 PE=1 SV=1 && PF00504:Chlorophyll A-B binding protein	-
Niben261Chr16g1304010	5290.07	5154.7	5227.95	3632.81	2996.01	3872.65	5224.24	3500.49	0.577648	1.09125e-12	7.77596e-11	Niben261Chr16g1304010	Niben261Chr16	130370659	130370994	-	336	protein_coding	- && - && -	-
Niben261Chr06g1164013	237.502	245.04	175.504	434.389	518.502	395.402	219.348	449.431	-1.03485	1.1257e-12	8.00704e-11	Niben261Chr06g1164013	Niben261Chr06	116446025	116448452	-	1359	protein_coding	- && sp|Q9C9T2|SARD1_ARATH Protein SAR DEFICIENT 1 OS=Arabidopsis thaliana OX=3702 GN=SARD1 PE=1 SV=1 && PF07887:Calmodulin binding protein-like	-
Niben261Chr16g0166003	1958.45	1766.28	2010.04	2742.74	2638.32	2706.54	1911.59	2695.87	-0.49543	1.12936e-12	8.01863e-11	Niben261Chr16g0166003	Niben261Chr16	16613508	16617009	-	690	protein_coding	- && sp|Q94AL8|CRIM1_ARATH Cold-regulated 413 inner membrane protein 1, chloroplastic OS=Arabidopsis thaliana OX=3702 GN=COR413IM1 PE=1 SV=1 && PF05562:Cold acclimation protein WCOR413	-
Niben261Chr15g0017015	62.2028	84.267	68.1368	240.897	180.306	166.586	71.5355	195.93	-1.45838	1.13328e-12	8.03209e-11	Niben261Chr15g0017015	Niben261Chr15	1746018	1748531	+	489	protein_coding	- && sp|Q9SGZ8|FLZ6_ARATH FCS-Like Zinc finger 6 OS=Arabidopsis thaliana OX=3702 GN=FLZ6 PE=1 SV=1 && PF04570:zinc-finger of the FCS-type, C2-C2	-
Niben261Chr13g0954002	1439.15	1374.88	1379.25	1960.07	1970.7	1929.14	1397.76	1953.3	-0.48239	1.14432e-12	8.09586e-11	Niben261Chr13g0954002	Niben261Chr13	95442180	95444264	-	1233	protein_coding	- && sp|Q39134|AAP3_ARATH Amino acid permease 3 OS=Arabidopsis thaliana OX=3702 GN=AAP3 PE=1 SV=2 && PF01490:Transmembrane amino acid transporter protein	Aa_trans
Niben261Chr19g1478010	573.02	513.363	546.127	1050.66	1077.94	772.615	544.17	967.071	-0.828628	1.18373e-12	8.35976e-11	Niben261Chr19g1478010	Niben261Chr19	147821013	147821441	+	429	protein_coding	- && - && -	-
Niben261Chr09g0976003	2062.12	1723.04	1933.64	2905.28	3027.19	2605.06	1906.27	2845.84	-0.577298	1.19969e-12	8.45738e-11	Niben261Chr09g0976003	Niben261Chr09	97569401	97571445	-	378	protein_coding	- && sp|Q8LD26|DRMH3_ARATH Dormancy-associated protein homolog 3 OS=Arabidopsis thaliana OX=3702 GN=At1g56220 PE=1 SV=1 && PF05564:Dormancy/auxin associated protein	-
Niben261Chr01g0873008	137.6	135.271	123.885	293.14	278.744	257.538	132.252	276.474	-1.06335	1.25949e-12	8.86317e-11	Niben261Chr01g0873008	Niben261Chr01	87306386	87308699	-	1533	protein_coding	- && sp|Q8GW61|STP14_ARATH Sugar transport protein 14 OS=Arabidopsis thaliana OX=3702 GN=STP14 PE=2 SV=2 && PF00083:Sugar (and other) transporter	Sugar_tr
novel.850	513.644	542.192	431.533	836.851	829.408	782.188	495.79	816.149	-0.719515	1.27261e-12	8.93965e-11	-	Niben261Chr03	70163767	70166803	+	2207	-	- && O04567.1 RecName: Full=Probable inactive receptor kinase At1g27190; Flags: Precursor && -	-
Niben261Chr03g1470001	1360.92	1392.62	1444.29	823.307	923.947	1004.3	1399.28	917.186	0.609169	1.28204e-12	8.98991e-11	Niben261Chr03g1470001	Niben261Chr03	147009016	147014930	-	2370	protein_coding	- && sp|Q42371|ERECT_ARATH LRR receptor-like serine/threonine-protein kinase ERECTA OS=Arabidopsis thaliana OX=3702 GN=ERECTA PE=1 SV=1 && PF13855:Leucine rich repeat|PF08263:Leucine rich repeat N-terminal domain|PF00069:Protein kinase domain	Pkinase
Niben261Chr12g0026001	2619.12	2617.82	2547.9	1831.4	1758.23	1974.14	2594.95	1854.59	0.484538	1.29178e-12	9.0422e-11	Niben261Chr12g0026001	Niben261Chr12	2590048	2598696	+	2058	protein_coding	- && sp|Q96480|P5CS_SOLLC Delta-1-pyrroline-5-carboxylate synthase OS=Solanum lycopersicum OX=4081 GN=PRO2 PE=2 SV=1 && PF00171:Aldehyde dehydrogenase family|PF00696:Amino acid kinase family	AA_kinase
Niben261Chr11g0710012	11949.5	11741.9	12177.9	9529.46	8916.87	8991.82	11956.5	9146.05	0.386594	1.32666e-12	9.26998e-11	Niben261Chr11g0710012	Niben261Chr11	70903513	70914250	-	1284	protein_coding	- && sp|P12859|G3PB_PEA Glyceraldehyde-3-phosphate dehydrogenase B, chloroplastic OS=Pisum sativum OX=3888 GN=GAPB PE=1 SV=2 && PF00044:Glyceraldehyde 3-phosphate dehydrogenase, NAD binding domain|PF02800:Glyceraldehyde 3-phosphate dehydrogenase, C-terminal domain	-
Niben261Chr15g0850004	4870.67	5046.04	4879.01	3618.29	3423.87	3837.22	4931.91	3626.46	0.443437	1.43272e-12	9.97885e-11	Niben261Chr15g0850004	Niben261Chr15	85022581	85034532	-	2283	protein_coding	- && sp|Q93Y08|AB1K8_ARATH Protein ACTIVITY OF BC1 COMPLEX KINASE 8, chloroplastic OS=Arabidopsis thaliana OX=3702 GN=ABC1K8 PE=2 SV=1 && PF03109:ABC1 family	ABC1
Niben261Chr06g0985013	1653.09	1624.36	1546.5	1175.46	1077.94	1079.94	1607.98	1111.11	0.533387	1.43314e-12	9.97885e-11	Niben261Chr06g0985013	Niben261Chr06	98488850	98491302	+	636	protein_coding	- && sp|O48529|STR9_ARATH Rhodanese-like domain-containing protein 9, chloroplastic OS=Arabidopsis thaliana OX=3702 GN=STR9 PE=2 SV=1 && PF00581:Rhodanese-like domain	Rhodanese
Niben261Chr08g0369021	796.385	730.683	757.764	1101.94	1130.57	1196.74	761.611	1143.08	-0.584972	1.55409e-12	1.0802e-10	Niben261Chr08g0369021	Niben261Chr08	36867092	36873141	+	1185	protein_coding	- && sp|Q9LFL3|TOL1_ARATH TOM1-like protein 1 OS=Arabidopsis thaliana OX=3702 GN=TOL1 PE=1 SV=1 && PF03127:GAT domain|PF00790:VHS domain	-
novel.3696	5914.92	5811.1	5924.81	7958.31	7837.96	7415.95	5883.61	7737.41	-0.395084	1.55688e-12	1.08025e-10	-	Niben261Chr10	26027682	26029889	-	1759	-	- && P0CG85.1 RecName: Full=Polyubiquitin; Contains: RecName: Full=Ubiquitin; Flags: Precursor >Q8H159.2 RecName: Full=Polyubiquitin 10; Contains: RecName: Full=Ubiquitin; Flags: Precursor && PF00240:Ubiquitin family	ubiquitin
Niben261Chr13g0654019	38001.2	37158.4	37854.1	30099.6	28616	26784.9	37671.3	28500.2	0.402508	1.61684e-12	1.11989e-10	Niben261Chr13g0654019	Niben261Chr13	65452630	65454563	-	627	protein_coding	- && sp|Q9SUI4|PSAL_ARATH Photosystem I reaction center subunit XI, chloroplastic OS=Arabidopsis thaliana OX=3702 GN=PSAL PE=1 SV=2 && PF02605:Photosystem I reaction centre subunit XI	-
Niben261Chr04g1722009	12029.6	11407.1	11940.5	9182.15	8897.38	9178.51	11792.4	9086.01	0.376218	1.71066e-12	1.1828e-10	Niben261Chr04g1722009	Niben261Chr04	172229035	172229798	-	432	protein_coding	- && sp|Q949Q5|PSAO_ARATH Photosystem I subunit O OS=Arabidopsis thaliana OX=3702 GN=PSAO PE=1 SV=1 && -	-
Niben261Chr08g0347014	618.258	646.416	625.62	959.719	943.44	948.774	630.098	950.644	-0.593848	1.75397e-12	1.21064e-10	Niben261Chr08g0347014	Niben261Chr08	34773834	34778625	-	1197	protein_coding	- && sp|Q6Z1G7|ODPB1_ORYSJ Pyruvate dehydrogenase E1 component subunit beta-1, mitochondrial OS=Oryza sativa subsp. japonica OX=39947 GN=Os08g0536000 PE=2 SV=1 && PF02779:Transketolase, pyrimidine binding domain|PF02780:Transketolase, C-terminal domain	-
Niben261Chr08g0143014	663.497	637.546	653.494	940.37	1065.27	990.9	651.512	998.846	-0.616	1.76128e-12	1.21357e-10	Niben261Chr08g0143014	Niben261Chr08	14360314	14371512	+	1785	protein_coding	- && - && PF13855:Leucine rich repeat	-
Niben261Chr14g1513046	629.568	571.02	496.573	976.165	949.287	861.652	565.72	929.035	-0.714529	1.80095e-12	1.23875e-10	Niben261Chr14g1513046	Niben261Chr14	151175955	151178620	+	1002	protein_coding	- && sp|C6TAQ0|NRPB_SOYBN DCD domain-containing protein NRP-B OS=Glycine max OX=3847 GN=NRP-B PE=2 SV=1 && PF10539:Development and cell death domain	-
Niben261Chr07g1494022	5262.74	4828.72	4586.85	6872.82	7308.73	6440.37	4892.77	6873.98	-0.490254	1.84197e-12	1.26476e-10	Niben261Chr07g1494022	Niben261Chr07	149412822	149432263	+	11111	protein_coding	- && - && -	-
Niben261Chr04g1079002	34.8713	41.0247	38.1979	141.249	119.879	110.1	38.0313	123.743	-1.70529	1.8925e-12	1.29721e-10	Niben261Chr04g1079002	Niben261Chr04	107956357	107961669	+	330	protein_coding	- && sp|Q43636|TRXH_RICCO Thioredoxin H-type OS=Ricinus communis OX=3988 PE=3 SV=1 && PF00085:Thioredoxin	-
Niben261Chr15g0406009	257.293	269.433	242.608	419.877	517.527	463.377	256.445	466.927	-0.865007	1.99602e-12	1.36581e-10	Niben261Chr15g0406009	Niben261Chr15	40590505	40593762	+	954	protein_coding	- && sp|P22335|HSF24_SOLPE Heat shock factor protein HSF24 OS=Solanum peruvianum OX=4082 GN=HSF24 PE=2 SV=1 && PF00447:HSF-type DNA-binding	HSF_DNA-bind
Niben261Chr08g0068001	2415.54	2674.37	2463.25	1825.59	1786.49	1810.43	2517.72	1807.5	0.477619	2.03667e-12	1.39122e-10	Niben261Chr08g0068001	Niben261Chr08	6791930	6792406	+	477	protein_coding	- && sp|P16180|RR17_ARATH 30S ribosomal protein S17, chloroplastic OS=Arabidopsis thaliana OX=3702 GN=RPS17 PE=1 SV=1 && PF00366:Ribosomal protein S17	-
Niben261Chr07g0906002	375.102	324.871	321.069	677.221	531.172	611.773	340.347	606.722	-0.832444	2.06348e-12	1.40711e-10	Niben261Chr07g0906002	Niben261Chr07	90600381	90608275	-	1545	protein_coding	- && sp|Q8VYH2|ERG16_ARATH Squalene epoxidase 3 OS=Arabidopsis thaliana OX=3702 GN=SQE3 PE=1 SV=1 && PF08491:Squalene epoxidase|PF13450:NAD(P)-binding Rossmann-like domain	-
novel.3894	36.7562	79.8319	72.2663	2.90238	9.74628	4.78696	62.9515	5.81187	3.43479	2.09347e-12	1.4251e-10	-	Niben261Chr11	30750212	30752907	+	2696	-	- && - && -	-
Niben261Chr16g0981020	6017.65	6225.78	5663.62	4575.11	4235.73	4435.59	5969.02	4415.48	0.434835	2.12195e-12	1.44202e-10	Niben261Chr16g0981020	Niben261Chr16	98168714	98175879	+	1569	protein_coding	- && sp|P37107|SR54C_ARATH Signal recognition particle 54 kDa protein, chloroplastic OS=Arabidopsis thaliana OX=3702 GN=FFC PE=1 SV=1 && PF00448:SRP54-type protein, GTPase domain|PF02978:Signal peptide binding domain|PF02881:SRP54-type protein, helical bundle domain	-
Niben261Chr03g1760001	795.442	680.789	590.519	1252.86	1070.14	1128.76	688.917	1150.59	-0.738731	2.2989e-12	1.55959e-10	Niben261Chr03g1760001	Niben261Chr03	176015358	176018549	-	996	protein_coding	- && sp|Q9XG54|OPR1_SOLLC 12-oxophytodienoate reductase 1 OS=Solanum lycopersicum OX=4081 GN=OPR1 PE=1 SV=1 && PF00724:NADH:flavin oxidoreductase / NADH oxidase family	Oxidored_FMN
Niben261Chr15g1289015	26250.5	23388.5	26092.3	37550	37786.3	32052.5	25243.8	35796.3	-0.503829	2.48881e-12	1.68554e-10	Niben261Chr15g1289015	Niben261Chr15	128978111	128979764	-	849	protein_coding	- && sp|P31237|ACCO_ACTDE 1-aminocyclopropane-1-carboxylate oxidase OS=Actinidia deliciosa OX=3627 GN=ACO PE=2 SV=1 && PF14226:non-haem dioxygenase in morphine synthesis N-terminal|PF03171:2OG-Fe(II) oxygenase superfamily	2OG-FeII_Oxy
Niben261Chr14g1292006	1108.34	1170.87	1191.36	744.943	683.214	824.314	1156.86	750.824	0.623131	2.52252e-12	1.70546e-10	Niben261Chr14g1292006	Niben261Chr14	129274659	129280623	+	1386	protein_coding	- && sp|Q9M158|STR4_ARATH Rhodanese-like domain-containing protein 4, chloroplastic OS=Arabidopsis thaliana OX=3702 GN=STR4 PE=1 SV=2 && -	-
Niben261Chr16g0578007	98.959	95.3547	62.9749	216.711	210.52	208.711	85.7629	211.98	-1.30432	2.64271e-12	1.78367e-10	Niben261Chr16g0578007	Niben261Chr16	57807814	57812220	+	1173	protein_coding	- && sp|Q9C9T2|SARD1_ARATH Protein SAR DEFICIENT 1 OS=Arabidopsis thaliana OX=3702 GN=SARD1 PE=1 SV=1 && PF07887:Calmodulin binding protein-like	-
Niben261Chr15g1441020	594.697	541.083	579.163	334.741	335.272	359.022	571.647	343.011	0.737627	2.68153e-12	1.8068e-10	Niben261Chr15g1441020	Niben261Chr15	144066418	144079375	-	1371	protein_coding	- && sp|Q9SNB6|RDUF1_ARATH E3 ubiquitin-protein ligase RDUF1 OS=Arabidopsis thaliana OX=3702 GN=RDUF1 PE=1 SV=1 && PF13456:Reverse transcriptase-like|PF06547:Protein of unknown function (DUF1117)|PF13639:Ring finger domain|PF14369:zinc-ribbon	-
Niben261Chr10g1034006	11640.4	11779.6	11088.8	8752.6	7926.65	8918.1	11502.9	8532.45	0.430939	2.6877e-12	1.80788e-10	Niben261Chr10g1034006	Niben261Chr10	103397719	103399176	+	1458	protein_coding	- && sp|Q43364|EFTUB_NICSY Elongation factor TuB, chloroplastic OS=Nicotiana sylvestris OX=4096 GN=TUFB PE=2 SV=1 && PF03143:Elongation factor Tu C-terminal domain|PF00009:Elongation factor Tu GTP binding domain|PF03144:Elongation factor Tu domain 2	GTP_EFTU
Niben261Chr03g0037016	218.652	182.948	189.957	369.569	368.409	374.34	197.186	370.773	-0.908208	2.69465e-12	1.80948e-10	Niben261Chr03g0037016	Niben261Chr03	3686742	3690630	+	1800	protein_coding	- && sp|Q6R3L0|YSL1_ARATH Metal-nicotianamine transporter YSL1 OS=Arabidopsis thaliana OX=3702 GN=YSL1 PE=2 SV=2 && PF03169:OPT oligopeptide transporter protein	OPT
Niben261Chr17g1458008	1070.64	1002.33	1101.55	1588.57	1549.66	1465.77	1058.17	1534.66	-0.535786	2.76071e-12	1.85071e-10	Niben261Chr17g1458008	Niben261Chr17	145852714	145858658	-	1092	protein_coding	- && sp|Q9SAV3|ODBB1_ARATH 2-oxoisovalerate dehydrogenase subunit beta 1, mitochondrial OS=Arabidopsis thaliana OX=3702 GN=BCDH BETA1 PE=2 SV=1 && PF02780:Transketolase, C-terminal domain|PF02779:Transketolase, pyrimidine binding domain	-
Niben261Chr06g1111004	1738.85	1682.01	1816.98	1202.55	1038.95	1260.88	1745.95	1167.46	0.580642	2.89563e-12	1.93787e-10	Niben261Chr06g1111004	Niben261Chr06	111095787	111096591	-	480	protein_coding	- && - && PF06549:Protein of unknown function (DUF1118)	-
Niben261Chr14g0973004	7280.56	7801.35	7162.63	5488.39	5032	5708.92	7414.84	5409.77	0.454698	2.90688e-12	1.94212e-10	Niben261Chr14g0973004	Niben261Chr14	97384975	97389128	-	2355	protein_coding	- && sp|I1K0K6|EFGC2_SOYBN Elongation factor G-2, chloroplastic OS=Glycine max OX=3847 GN=fusA2 PE=3 SV=1 && PF00009:Elongation factor Tu GTP binding domain|PF00679:Elongation factor G C-terminus|PF14492:Elongation Factor G, domain II|PF03764:Elongation factor G, domain IV|PF03144:Elongation factor Tu domain 2	GTP_EFTU
Niben261Chr09g0662005	167.759	139.706	126.982	298.945	338.196	278.601	144.816	305.247	-1.07257	2.94713e-12	1.9657e-10	Niben261Chr09g0662005	Niben261Chr09	66267567	66285617	+	1782	protein_coding	- && - && PF03107:C1 domain	-
Niben261Chr07g1200003	621.086	598.739	598.778	1008.09	1008.74	853.035	606.201	956.622	-0.657657	3.00303e-12	1.99961e-10	Niben261Chr07g1200003	Niben261Chr07	120021498	120025686	+	1125	protein_coding	- && sp|P42620|YQJG_ECOLI Glutathionyl-hydroquinone reductase YqjG OS=Escherichia coli (strain K12) OX=83333 GN=yqjG PE=1 SV=1 && PF13410:Glutathione S-transferase, C-terminal domain|PF13409:Glutathione S-transferase, N-terminal domain	-
Niben261Chr09g1331019	14820.3	14975.1	15712.8	19230.2	19744	19549	15169.4	19507.7	-0.362898	3.04458e-12	2.02388e-10	Niben261Chr09g1331019	Niben261Chr09	133081664	133086082	-	1458	protein_coding	- && sp|Q00081|GLGL1_SOLTU Glucose-1-phosphate adenylyltransferase large subunit 1 (Fragment) OS=Solanum tuberosum OX=4113 GN=AGPS1 PE=1 SV=1 && PF00483:Nucleotidyl transferase	-
Niben261Chr05g0932006	226.192	242.822	233.317	452.771	435.659	385.829	234.11	424.753	-0.860312	3.20943e-12	2.12989e-10	Niben261Chr05g0932006	Niben261Chr05	93168822	93170982	-	1395	protein_coding	- && sp|Q39134|AAP3_ARATH Amino acid permease 3 OS=Arabidopsis thaliana OX=3702 GN=AAP3 PE=1 SV=2 && PF01490:Transmembrane amino acid transporter protein	Aa_trans
Niben261Chr15g0971009	3.76987	1.10878	1.03238	72.5594	33.1373	68.9322	1.97034	58.2096	-4.83852	3.25069e-12	2.15366e-10	Niben261Chr15g0971009	Niben261Chr15	97100056	97101021	+	348	protein_coding	- && sp|Q8GUK6|PIS2_ARATH Probable CDP-diacylglycerol--inositol 3-phosphatidyltransferase 2 OS=Arabidopsis thaliana OX=3702 GN=PIS2 PE=2 SV=2 && -	-
Niben261Chr11g0893002	1412.76	1419.23	1391.64	1025.51	955.135	954.519	1407.88	978.387	0.52503	3.26171e-12	2.15736e-10	Niben261Chr11g0893002	Niben261Chr11	89265635	89273016	+	981	protein_coding	- && sp|Q9THX6|TL29_SOLLC Thylakoid lumenal 29 kDa protein, chloroplastic OS=Solanum lycopersicum OX=4081 GN=CLEB3J9 PE=3 SV=1 && PF00141:Peroxidase	-
Niben261Chr06g1109009	1141.33	1281.75	984.887	1945.56	1791.37	1649.58	1135.99	1795.5	-0.660994	3.59737e-12	2.3754e-10	Niben261Chr06g1109009	Niben261Chr06	110883305	110893233	+	1917	protein_coding	- && sp|Q9FNU2|AB25B_ORYSJ ABC transporter B family member 25 OS=Oryza sativa subsp. japonica OX=39947 GN=ABCB25 PE=2 SV=1 && PF00664:ABC transporter transmembrane region|PF00005:ABC transporter	ABC_membrane
Niben261Chr19g0843004	370.39	354.808	335.522	549.516	637.407	595.497	353.573	594.14	-0.748118	3.68922e-12	2.432e-10	Niben261Chr19g0843004	Niben261Chr19	84340913	84345348	+	1206	protein_coding	- && - && PF05212:Protein of unknown function (DUF707)	-
Niben261Chr01g0210011	2932.96	2534.66	2820.45	4355.5	3983.3	3684.04	2762.69	4007.61	-0.536176	3.8279e-12	2.51923e-10	Niben261Chr01g0210011	Niben261Chr01	21026438	21044017	-	1323	protein_coding	- && sp|Q03666|GSTX4_TOBAC Probable glutathione S-transferase OS=Nicotiana tabacum OX=4097 PE=2 SV=1 && PF02798:Glutathione S-transferase, N-terminal domain|PF13410:Glutathione S-transferase, C-terminal domain	GST_N
Niben261Chr08g0199003	1098.92	1063.32	1015.86	1594.37	1638.35	1434.17	1059.36	1555.63	-0.553923	4.13731e-12	2.71834e-10	Niben261Chr08g0199003	Niben261Chr08	19936066	19944886	-	1917	protein_coding	- && sp|Q9FNU2|AB25B_ORYSJ ABC transporter B family member 25 OS=Oryza sativa subsp. japonica OX=39947 GN=ABCB25 PE=2 SV=1 && PF00664:ABC transporter transmembrane region|PF00005:ABC transporter	ABC_membrane
novel.2933	63.1453	60.9827	52.6512	7.73967	6.82239	9.57391	58.9264	8.04532	2.87211	4.29342e-12	2.81625e-10	-	Niben261Chr08	123901798	123903853	+	1908	-	- && - && -	-
Niben261Chr07g0552005	4459.75	4277.66	4277.13	3166.49	3120.76	3395.87	4338.18	3227.71	0.426688	4.50638e-12	2.95104e-10	Niben261Chr07g0552005	Niben261Chr07	55224531	55231741	-	2202	protein_coding	- && sp|Q40412|ABA2_NICPL Zeaxanthin epoxidase, chloroplastic OS=Nicotiana plumbaginifolia OX=4092 GN=ABA2 PE=1 SV=1 && PF01494:FAD binding domain|PF00498:FHA domain	FHA
Niben261Chr16g0985003	119.693	98.6811	91.8815	252.507	225.139	222.115	103.419	233.253	-1.16982	4.51408e-12	2.95121e-10	Niben261Chr16g0985003	Niben261Chr16	98414864	98415745	+	882	protein_coding	- && - && -	-
Niben261Chr04g1192052	3963.07	3811.97	3686.62	2738.87	2614.93	2958.34	3820.55	2770.71	0.463606	4.79415e-12	3.12915e-10	Niben261Chr04g1192052	Niben261Chr04	119244428	119249234	+	1431	protein_coding	- && sp|O24163|PPOC_TOBAC Protoporphyrinogen oxidase, chloroplastic OS=Nicotiana tabacum OX=4097 GN=PPXI PE=2 SV=1 && PF01593:Flavin containing amine oxidoreductase	Amino_oxidase
Niben261Chr14g1135002	1807.65	1757.41	1576.44	2511.52	2310.84	2515.07	1713.83	2445.81	-0.51291	5.46126e-12	3.55871e-10	Niben261Chr14g1135002	Niben261Chr14	113439934	113454743	+	2535	protein_coding	- && sp|Q9ZPI6|AIM1_ARATH Peroxisomal fatty acid beta-oxidation multifunctional protein AIM1 OS=Arabidopsis thaliana OX=3702 GN=AIM1 PE=1 SV=1 && PF00378:Enoyl-CoA hydratase/isomerase|PF02737:3-hydroxyacyl-CoA dehydrogenase, NAD binding domain|PF00725:3-hydroxyacyl-CoA dehydrogenase, C-terminal domain	3HCDH_N
Niben261Chr05g0371003	243.156	250.583	234.349	110.29	85.7672	127.333	242.696	107.797	1.16996	5.64464e-12	3.67217e-10	Niben261Chr05g0371003	Niben261Chr05	37112533	37117496	-	2274	protein_coding	- && sp|Q93YS4|AB22G_ARATH ABC transporter G family member 22 OS=Arabidopsis thaliana OX=3702 GN=ABCG22 PE=1 SV=1 && PF01061:ABC-2 type transporter|PF00005:ABC transporter	ABC_tran
Niben261Chr17g1546014	933.042	817.168	922.944	545.647	600.371	567.733	891.052	571.25	0.642387	5.77847e-12	3.75307e-10	Niben261Chr17g1546014	Niben261Chr17	154586665	154592677	-	1071	protein_coding	- && sp|W8JWV8|8HGO_CATRO 8-hydroxygeraniol oxidoreductase OS=Catharanthus roseus OX=4058 GN=8HGO PE=1 SV=1 && PF08240:Alcohol dehydrogenase GroES-like domain|PF00107:Zinc-binding dehydrogenase	ADH_zinc_N
Niben261Chr13g0757003	121.578	103.116	99.1081	37.7309	27.2896	27.7643	107.934	30.9283	1.80492	5.90978e-12	3.83207e-10	Niben261Chr13g0757003	Niben261Chr13	75659273	75663804	+	1461	protein_coding	- && sp|Q9FMS6|CAF1K_ARATH Probable CCR4-associated factor 1 homolog 11 OS=Arabidopsis thaliana OX=3702 GN=CAF1-11 PE=2 SV=1 && PF04857:CAF1 family ribonuclease	CAF1
Niben261Chr14g1225007	306.302	217.32	273.58	137.379	108.184	93.8243	265.734	113.129	1.23464	5.92082e-12	3.83296e-10	Niben261Chr14g1225007	Niben261Chr14	122501506	122504503	-	1194	protein_coding	- && sp|Q9FE67|ERF80_ARATH Ethylene-responsive transcription factor 9 OS=Arabidopsis thaliana OX=3702 GN=ERF9 PE=1 SV=1 && PF00847:AP2 domain	AP2
Niben261Chr02g0735004	1212.01	1283.96	1297.7	843.624	835.256	910.479	1264.56	863.119	0.550487	5.98292e-12	3.86684e-10	Niben261Chr02g0735004	Niben261Chr02	73545816	73548645	+	984	protein_coding	- && sp|Q8GYN9|MENB_ARATH 1,4-dihydroxy-2-naphthoyl-CoA synthase, peroxisomal OS=Arabidopsis thaliana OX=3702 GN=MENB PE=1 SV=2 && PF00378:Enoyl-CoA hydratase/isomerase	ECH
Niben261Chr11g0889003	162.104	134.162	178.601	42.5682	67.2493	56.4861	158.289	55.4345	1.51539	6.02584e-12	3.88824e-10	Niben261Chr11g0889003	Niben261Chr11	88968022	88968981	+	960	protein_coding	- && sp|O82161|PHI1_TOBAC Protein PHOSPHATE-INDUCED 1 OS=Nicotiana tabacum OX=4097 GN=PHI-1 PE=2 SV=1 && PF04674:Phosphate-induced protein 1 conserved region	-
Niben261Chr16g0099011	2068.71	1992.47	2060.62	1334.13	1394.69	1550.97	2040.6	1426.6	0.516513	6.04738e-12	3.89579e-10	Niben261Chr16g0099011	Niben261Chr16	9974568	9983895	+	1737	protein_coding	- && sp|Q56ZZ7|PLST4_ARATH Plastidic glucose transporter 4 OS=Arabidopsis thaliana OX=3702 GN=At5g16150 PE=1 SV=2 && PF00083:Sugar (and other) transporter	Sugar_tr
Niben261Chr08g0024015	102.729	103.116	103.238	241.865	303.109	194.35	103.028	246.441	-1.25792	6.38733e-12	4.10811e-10	Niben261Chr08g0024015	Niben261Chr08	2422824	2434504	-	1776	protein_coding	- && sp|A0A1D6F9Y9|C92C6_MAIZE Trimethyltridecatetraene synthase OS=Zea mays OX=4577 GN=CYP92C6 PE=1 SV=1 && PF00067:Cytochrome P450	p450
Niben261Chr02g1370002	210.17	172.969	170.342	435.356	347.942	333.172	184.494	372.157	-1.00962	6.50114e-12	4.17453e-10	Niben261Chr02g1370002	Niben261Chr02	136989983	136991930	-	876	protein_coding	- && sp|P53844|PDR17_YEAST Phosphatidylinositol transfer protein PDR17 OS=Saccharomyces cerevisiae (strain ATCC 204508 / S288c) OX=559292 GN=PDR17 PE=1 SV=1 && PF03765:CRAL/TRIO, N-terminal domain|PF00650:CRAL/TRIO domain	CRAL_TRIO_N
Niben261Chr04g1547019	81.0522	53.2213	70.2016	192.524	222.215	149.353	68.1583	188.031	-1.45738	6.67202e-12	4.27732e-10	Niben261Chr04g1547019	Niben261Chr04	154648173	154650008	-	1407	protein_coding	- && sp|Q6VAA6|U74G1_STERE UDP-glycosyltransferase 74G1 OS=Stevia rebaudiana OX=55670 GN=UGT74G1 PE=1 SV=1 && PF00201:UDP-glucoronosyl and UDP-glucosyl transferase	UDPGT
Niben261Chr19g1161012	1030.12	1031.16	1077.8	654.969	641.305	754.424	1046.36	683.566	0.614024	6.71379e-12	4.29715e-10	Niben261Chr19g1161012	Niben261Chr19	116085841	116091714	+	1632	protein_coding	- && sp|Q40545|KPYA_TOBAC Pyruvate kinase isozyme A, chloroplastic OS=Nicotiana tabacum OX=4097 PE=2 SV=1 && PF00224:Pyruvate kinase, barrel domain|PF02887:Pyruvate kinase, alpha/beta domain	PK
Niben261Chr07g1355001	433.535	478.991	399.53	773.967	902.505	649.111	437.352	775.194	-0.826382	6.74201e-12	4.30826e-10	Niben261Chr07g1355001	Niben261Chr07	135545657	135549014	+	1572	protein_coding	- && sp|Q41144|STC_RICCO Sugar carrier protein C OS=Ricinus communis OX=3988 GN=STC PE=2 SV=1 && PF00083:Sugar (and other) transporter	Sugar_tr
novel.2006	519.299	641.981	627.685	322.164	323.576	376.255	596.322	340.665	0.806038	6.77869e-12	4.32472e-10	-	Niben261Chr05	135084945	135092378	-	3852	-	- && Q9FL59.1 RecName: Full=FT-interacting protein 1 && -	-
Niben261Chr05g0696002	4419.23	4651.32	4305.01	3080.39	2640.27	3376.72	4458.52	3032.46	0.555914	6.88182e-12	4.38345e-10	Niben261Chr05g0696002	Niben261Chr05	69605049	69608282	+	1434	protein_coding	- && sp|P31593|GSA_TOBAC Glutamate-1-semialdehyde 2,1-aminomutase, chloroplastic OS=Nicotiana tabacum OX=4097 GN=GSA PE=2 SV=1 && PF00202:Aminotransferase class-III	Aminotran_3
Niben261Chr19g1262001	471.233	446.837	458.375	726.561	730.971	696.981	458.815	718.171	-0.645688	7.21256e-12	4.58675e-10	Niben261Chr19g1262001	Niben261Chr19	126217857	126220353	-	1017	protein_coding	- && sp|Q8RWW7|URGT4_ARATH UDP-rhamnose/UDP-galactose transporter 4 OS=Arabidopsis thaliana OX=3702 GN=URGT4 PE=1 SV=1 && PF03151:Triose-phosphate Transporter family	-
Niben261Chr10g0377012	213.94	169.643	188.925	416.975	484.39	314.024	190.836	405.13	-1.08329	7.26178e-12	4.61065e-10	Niben261Chr10g0377012	Niben261Chr10	37724541	37727115	+	942	protein_coding	- && sp|Q9ZVJ6|ANXD4_ARATH Annexin D4 OS=Arabidopsis thaliana OX=3702 GN=ANN4 PE=1 SV=1 && PF00191:Annexin	-
Niben261Chr04g1115020	3.76987	0	0	64.8197	55.5538	55.5287	1.25662	58.6341	-5.43501	7.41003e-12	4.69725e-10	Niben261Chr04g1115020	Niben261Chr04	111490758	111504546	+	1125	protein_coding	- && - && -	-
Niben261Chr18g0897006	50.8932	72.0704	37.1655	178.98	158.864	139.779	53.3764	159.208	-1.58258	7.43687e-12	4.70673e-10	Niben261Chr18g0897006	Niben261Chr18	89776353	89778838	-	663	protein_coding	- && sp|Q9FMR3|NAC90_ARATH NAC domain-containing protein 90 OS=Arabidopsis thaliana OX=3702 GN=NAC090 PE=1 SV=1 && PF02365:No apical meristem (NAM) protein	NAM
Niben261Chr03g1719002	242.214	313.784	233.317	462.445	520.451	470.079	263.105	484.325	-0.883328	7.53911e-12	4.76383e-10	Niben261Chr03g1719002	Niben261Chr03	171938987	171942902	-	1554	protein_coding	- && sp|Q38873|CDPK7_ARATH Calcium-dependent protein kinase 7 OS=Arabidopsis thaliana OX=3702 GN=CPK7 PE=2 SV=1 && PF13499:EF-hand domain pair|PF00069:Protein kinase domain	Pkinase
Niben261Chr16g0514022	719.102	663.048	563.677	1024.54	1044.8	1002.39	648.609	1023.91	-0.65776	7.55172e-12	4.7642e-10	Niben261Chr16g0514022	Niben261Chr16	51410082	51415390	-	1563	protein_coding	- && sp|Q8W4F0|DAR1_ARATH Protein DA1-related 1 OS=Arabidopsis thaliana OX=3702 GN=DAR1 PE=1 SV=3 && PF00412:LIM domain|PF12315:Protein DA1	LIM
Niben261Chr18g0008017	67.8576	51.0037	43.3598	166.403	185.179	128.29	54.0737	159.957	-1.55877	7.81524e-12	4.92261e-10	Niben261Chr18g0008017	Niben261Chr18	844158	862927	+	3201	protein_coding	- && sp|O81862|CHIC_ARATH Class V chitinase OS=Arabidopsis thaliana OX=3702 GN=ChiC PE=1 SV=1 && PF00704:Glycosyl hydrolases family 18|PF07714:Protein tyrosine kinase	Pkinase_Tyr
Niben261Chr11g0230004	641.82	674.136	804.221	1200.62	1037.98	1142.17	706.726	1126.92	-0.673668	7.86954e-12	4.94894e-10	Niben261Chr11g0230004	Niben261Chr11	23066848	23069490	+	1194	protein_coding	- && sp|Q94B38|GPT2_ARATH Glucose-6-phosphate/phosphate translocator 2, chloroplastic OS=Arabidopsis thaliana OX=3702 GN=GPT2 PE=2 SV=2 && PF03151:Triose-phosphate Transporter family	-
Niben261Chr16g1217003	323.266	237.278	270.483	519.525	556.512	461.462	277.009	512.5	-0.884003	7.94822e-12	4.9905e-10	Niben261Chr16g1217003	Niben261Chr16	121770769	121774581	-	1626	protein_coding	- && sp|Q8L7Y9|NPC1_ARATH Non-specific phospholipase C1 OS=Arabidopsis thaliana OX=3702 GN=NPC1 PE=2 SV=1 && PF04185:Phosphoesterase family	Phosphoesterase
Niben261Chr01g1212008	294.05	297.152	260.159	516.623	536.045	447.102	283.787	499.923	-0.816763	8.06222e-12	5.05407e-10	Niben261Chr01g1212008	Niben261Chr01	121156255	121158834	-	882	protein_coding	- && sp|P53844|PDR17_YEAST Phosphatidylinositol transfer protein PDR17 OS=Saccharomyces cerevisiae (strain ATCC 204508 / S288c) OX=559292 GN=PDR17 PE=1 SV=1 && PF00650:CRAL/TRIO domain	-
novel.5647	156.45	154.12	235.382	54.1777	72.1224	67.9748	181.984	64.7583	1.49062	8.17137e-12	5.1144e-10	-	Niben261Chr15	140296110	140296677	-	526	-	- && - && -	-
Niben261Chr04g1843001	2817.98	2963.76	2798.77	2179.68	2049.64	2096.69	2860.17	2108.67	0.439522	8.26135e-12	5.16256e-10	Niben261Chr04g1843001	Niben261Chr04	184352632	184359477	-	1581	protein_coding	- && sp|Q6STH5|HF101_ARATH Fe-S cluster assembly factor HCF101, chloroplastic OS=Arabidopsis thaliana OX=3702 GN=HCF101 PE=1 SV=1 && PF06155:Protein of unknown function (DUF971)|PF01883:Iron-sulfur cluster assembly protein|PF10609:NUBPL iron-transfer P-loop NTPase	-
Niben261Chr17g0086012	0	0	0	64.8197	51.6553	67.0174	0	61.1641	-8.34101	8.27442e-12	5.16258e-10	Niben261Chr17g0086012	Niben261Chr17	8597917	8608354	+	825	protein_coding	- && sp|Q9LIR9|NIPA1_ARATH Probable magnesium transporter NIPA1 OS=Arabidopsis thaliana OX=3702 GN=At3g23870 PE=2 SV=1 && PF05653:Magnesium transporter NIPA	DUF803
Niben261Chr04g1786027	713.447	722.922	735.052	1072.91	1068.19	1041.64	723.807	1060.91	-0.551772	8.38412e-12	5.22281e-10	Niben261Chr04g1786027	Niben261Chr04	178638600	178645205	-	1221	protein_coding	- && sp|Q9ZQ31|STY13_ARATH Serine/threonine-protein kinase STY13 OS=Arabidopsis thaliana OX=3702 GN=STY13 PE=1 SV=2 && PF07714:Protein tyrosine kinase	Pkinase_Tyr
Niben261Chr16g0833003	250.696	186.274	214.734	415.04	456.126	377.212	217.235	416.126	-0.933883	8.47494e-12	5.27109e-10	Niben261Chr16g0833003	Niben261Chr16	83380126	83382534	-	747	protein_coding	- && sp|Q7XKE9|CLC1_ORYSJ Clathrin light chain 1 OS=Oryza sativa subsp. japonica OX=39947 GN=Os04g0679100 PE=2 SV=1 && PF01086:Clathrin light chain	-
Niben261Chr03g0801007	2653.99	2633.34	2407.5	1904.93	1842.05	1825.74	2564.94	1857.57	0.465582	8.51538e-12	5.28795e-10	Niben261Chr03g0801007	Niben261Chr03	80172013	80174290	-	1152	protein_coding	- && sp|P46283|S17P_ARATH Sedoheptulose-1,7-bisphosphatase, chloroplastic OS=Arabidopsis thaliana OX=3702 GN=At3g55800 PE=2 SV=1 && PF00316:Fructose-1-6-bisphosphatase, N-terminal domain	-
Niben261Chr05g0472013	4243.93	4458.39	4484.64	3361.92	3202.63	3370.97	4395.65	3311.84	0.408241	8.87166e-12	5.50057e-10	Niben261Chr05g0472013	Niben261Chr05	47218368	47224867	+	1644	protein_coding	- && sp|Q5Z5A8|P2SAF_ORYSJ Photosystem II stability/assembly factor HCF136, chloroplastic OS=Oryza sativa subsp. japonica OX=39947 GN=HCF136 PE=3 SV=1 && PF14870:Photosynthesis system II assembly factor YCF48	-
novel.4656	785.075	727.357	802.156	1250.92	1220.23	1062.7	771.529	1177.95	-0.609787	9.24647e-12	5.724e-10	-	Niben261Chr13	86231757	86236305	+	3559	-	- && Q9M0G7.1 RecName: Full=MDIS1-interacting receptor like kinase 1; Short=AtMIK1; AltName: Full=Leucine-rich repeat receptor-like protein kinase PXL2; AltName: Full=Protein PHLOEM INTERCALATED WITH XYLEM-LIKE 2; Flags: Precursor && PF00069:Protein kinase domain|PF13855:Leucine rich repeat	Pkinase
Niben261Chr19g0603014	1633.3	1542.31	1661.09	1166.75	966.831	1121.1	1612.23	1084.9	0.571676	9.26133e-12	5.72425e-10	Niben261Chr19g0603014	Niben261Chr19	60249420	60253825	+	1032	protein_coding	- && sp|Q9THX6|TL29_SOLLC Thylakoid lumenal 29 kDa protein, chloroplastic OS=Solanum lycopersicum OX=4081 GN=CLEB3J9 PE=3 SV=1 && PF00141:Peroxidase	-
Niben261Chr07g1390002	3475.82	3692.22	3529.69	2524.1	2204.61	2714.2	3565.91	2480.97	0.523128	9.44079e-12	5.82609e-10	Niben261Chr07g1390002	Niben261Chr07	138908679	138910846	+	1221	protein_coding	- && sp|P54260|GCST_SOLTU Aminomethyltransferase, mitochondrial OS=Solanum tuberosum OX=4113 GN=GDCST PE=2 SV=1 && PF08669:Glycine cleavage T-protein C-terminal barrel domain|PF01571:Aminomethyltransferase folate-binding domain	GCV_T
novel.4712	36.7562	54.33	27.8742	154.793	144.245	105.313	39.6535	134.784	-1.77203	9.48698e-12	5.84548e-10	-	Niben261Chr13	127491078	127493534	+	1968	-	- && - && -	-
Niben261Chr05g0343004	15.0795	8.87021	15.4856	69.657	81.8687	63.1878	13.1451	71.5712	-2.43371	1.01099e-11	6.21961e-10	Niben261Chr05g0343004	Niben261Chr05	34385433	34387781	-	1380	protein_coding	- && - && -	-
Niben261Chr02g1201002	307.244	334.85	263.256	510.818	538.969	515.076	301.784	521.621	-0.790434	1.02403e-11	6.29011e-10	Niben261Chr02g1201002	Niben261Chr02	120150130	120152941	-	2580	protein_coding	- && sp|Q9C5S1|MKP1_ARATH Protein-tyrosine-phosphatase MKP1 OS=Arabidopsis thaliana OX=3702 GN=MKP1 PE=1 SV=1 && PF00782:Dual specificity phosphatase, catalytic domain|PF00626:Gelsolin repeat	DSPc
novel.1162	1307.2	1439.19	1397.84	814.6	662.747	982.283	1381.41	819.877	0.752119	1.06776e-11	6.54855e-10	-	Niben261Chr03	138545679	138547582	-	492	-	- && - && -	-
Niben261Chr08g0160003	895.344	829.365	861.002	1413.46	1432.7	1157.49	861.903	1334.55	-0.630088	1.08047e-11	6.61622e-10	Niben261Chr08g0160003	Niben261Chr08	15979636	15981470	-	1038	protein_coding	- && sp|Q9LW00|MBD11_ARATH Methyl-CpG-binding domain-containing protein 11 OS=Arabidopsis thaliana OX=3702 GN=MBD11 PE=1 SV=1 && PF01429:Methyl-CpG binding domain	MBD
Niben261Chr17g1393008	81.0522	46.5686	71.234	178.012	179.331	171.373	66.2849	176.239	-1.40214	1.08962e-11	6.66196e-10	Niben261Chr17g1393008	Niben261Chr17	139322337	139323268	+	417	protein_coding	- && sp|Q8SAG3|ADF_VITVI Actin-depolymerizing factor OS=Vitis vinifera OX=29760 PE=2 SV=1 && PF00241:Cofilin/tropomyosin-type actin-binding protein	Cofilin_ADF
Niben261Chr09g0391001	7977.04	7989.84	7902.84	6197.54	5935.48	6324.53	7956.57	6152.52	0.370949	1.13114e-11	6.90519e-10	Niben261Chr09g0391001	Niben261Chr09	39130946	39133953	+	1227	protein_coding	- && sp|Q9LYA9|CP41A_ARATH Chloroplast stem-loop binding protein of 41 kDa a, chloroplastic OS=Arabidopsis thaliana OX=3702 GN=CSP41A PE=1 SV=1 && PF01370:NAD dependent epimerase/dehydratase family	Epimerase
Niben261Chr06g0267017	549.458	488.97	347.911	837.819	796.271	906.649	462.113	846.913	-0.872952	1.14743e-11	6.99384e-10	Niben261Chr06g0267017	Niben261Chr06	26772874	26777010	-	2331	protein_coding	- && sp|Q84WB7|GINT1_ARATH Glucosamine inositolphosphorylceramide transferase 1 OS=Arabidopsis thaliana OX=3702 GN=GINT1 PE=1 SV=1 && PF09258:Glycosyl transferase family 64 domain	-
Niben261Chr18g0778002	5133.62	5399.74	5107.17	3883.38	3032.07	3732.87	5213.51	3549.44	0.554541	1.15698e-11	7.04121e-10	Niben261Chr18g0778002	Niben261Chr18	77865518	77871946	-	696	protein_coding	- && sp|Q9ASS6|PNSL5_ARATH Photosynthetic NDH subunit of lumenal location 5, chloroplastic OS=Arabidopsis thaliana OX=3702 GN=PNSL5 PE=1 SV=1 && PF00160:Cyclophilin type peptidyl-prolyl cis-trans isomerase/CLD	Pro_isomerase
novel.2719	78.2248	94.246	81.5577	18.3817	22.4164	21.0626	84.6761	20.6202	2.03616	1.17643e-11	7.14861e-10	-	Niben261Chr07	128341438	128342684	-	1247	-	- && - && -	-
Niben261Chr07g0843004	6676.44	5859.88	6268.59	9502.38	10547.4	8023.89	6268.3	9357.9	-0.577929	1.21058e-11	7.34484e-10	Niben261Chr07g0843004	Niben261Chr07	84300526	84305106	+	843	protein_coding	- && sp|P31237|ACCO_ACTDE 1-aminocyclopropane-1-carboxylate oxidase OS=Actinidia deliciosa OX=3627 GN=ACO PE=2 SV=1 && PF03171:2OG-Fe(II) oxygenase superfamily|PF14226:non-haem dioxygenase in morphine synthesis N-terminal	2OG-FeII_Oxy
Niben261Chr05g0823003	31252.2	31259.7	31367.7	25349.3	23529.5	24658.6	31293.2	24512.5	0.352331	1.23228e-11	7.46511e-10	Niben261Chr05g0823003	Niben261Chr05	82336512	82339510	-	1221	protein_coding	- && sp|Q40565|RCA2_TOBAC Ribulose bisphosphate carboxylase/oxygenase activase 2, chloroplastic OS=Nicotiana tabacum OX=4097 GN=RCA PE=2 SV=1 && PF00004:ATPase family associated with various cellular activities (AAA)	AAA
Niben261Chr13g1036014	495.738	467.904	545.095	843.624	739.742	817.612	502.912	800.326	-0.669853	1.23863e-11	7.49208e-10	Niben261Chr13g1036014	Niben261Chr13	103668053	103672320	-	1752	protein_coding	- && sp|A7LXU3|BGH3B_BACO1 Beta-glucosidase BoGH3B OS=Bacteroides ovatus (strain ATCC 8483 / DSM 1896 / JCM 5824 / NCTC 11153) OX=411476 GN=BACOVA_02659 PE=1 SV=1 && PF01915:Glycosyl hydrolase family 3 C-terminal domain|PF00933:Glycosyl hydrolase family 3 N terminal domain	Glyco_hydro_3
Niben261Chr05g0420023	502.335	526.669	561.613	1022.6	793.347	823.356	530.205	879.769	-0.731021	1.24347e-11	7.50641e-10	Niben261Chr05g0420023	Niben261Chr05	41984365	41985760	+	753	protein_coding	- && - && PF02496:ABA/WDS induced protein	-
Niben261Chr03g1024001	980.166	1048.9	950.818	1675.64	1676.36	1318.33	993.295	1556.77	-0.64855	1.24478e-11	7.50641e-10	Niben261Chr03g1024001	Niben261Chr03	102474696	102476313	-	774	protein_coding	- && sp|Q9FY93|NAC83_ARATH NAC domain-containing protein 83 OS=Arabidopsis thaliana OX=3702 GN=NAC083 PE=1 SV=1 && PF02365:No apical meristem (NAM) protein	NAM
Niben261Chr01g1152008	5591.66	5623.71	5440.62	3994.64	3699.69	4385.81	5552	4026.71	0.463344	1.25703e-11	7.56873e-10	Niben261Chr01g1152008	Niben261Chr01	115251786	115255829	-	2355	protein_coding	- && sp|I1K0K6|EFGC2_SOYBN Elongation factor G-2, chloroplastic OS=Glycine max OX=3847 GN=fusA2 PE=3 SV=1 && PF00009:Elongation factor Tu GTP binding domain|PF14492:Elongation Factor G, domain II|PF00679:Elongation factor G C-terminus|PF03764:Elongation factor G, domain IV|PF03144:Elongation factor Tu domain 2	GTP_EFTU
Niben261Chr05g0578009	4978.11	4816.52	4753.06	3694.72	3577.86	3791.27	4849.23	3687.95	0.39503	1.308e-11	7.86367e-10	Niben261Chr05g0578009	Niben261Chr05	57807905	57826786	-	2277	protein_coding	- && sp|O24133|CHLD_TOBAC Magnesium-chelatase subunit ChlD, chloroplastic OS=Nicotiana tabacum OX=4097 GN=CHLD PE=2 SV=1 && PF17863:AAA lid domain|PF13519:von Willebrand factor type A domain|PF01078:Magnesium chelatase, subunit ChlI	-
Niben261Chr05g0314025	121.578	117.53	120.788	257.344	258.276	229.774	119.966	248.465	-1.04973	1.52728e-11	9.1681e-10	Niben261Chr05g0314025	Niben261Chr05	31450746	31463132	-	1209	protein_coding	- && sp|O80662|TCHQD_ARATH Glutathione S-transferase TCHQD OS=Arabidopsis thaliana OX=3702 GN=TCHQD PE=2 SV=1 && PF13417:Glutathione S-transferase, N-terminal domain|PF00026:Eukaryotic aspartyl protease|PF13410:Glutathione S-transferase, C-terminal domain	Asp
Niben261Chr06g1428009	2255.32	2397.17	2218.58	1742.39	1527.24	1610.33	2290.36	1626.66	0.493367	1.5776e-11	9.45581e-10	Niben261Chr06g1428009	Niben261Chr06	142836557	142848240	+	1254	protein_coding	- && sp|P46312|FAD6C_ARATH Omega-6 fatty acid desaturase, chloroplastic OS=Arabidopsis thaliana OX=3702 GN=FAD6 PE=1 SV=2 && PF00487:Fatty acid desaturase	-
Niben261Chr03g0959001	60.3179	45.4598	36.1332	148.989	175.433	116.802	47.3036	147.074	-1.63041	1.58654e-11	9.49501e-10	Niben261Chr03g0959001	Niben261Chr03	95898792	95901392	-	1962	protein_coding	- && sp|Q9CAL3|CRK2_ARATH Cysteine-rich receptor-like protein kinase 2 OS=Arabidopsis thaliana OX=3702 GN=CRK2 PE=1 SV=1 && PF01657:Salt stress response/antifungal|PF00069:Protein kinase domain	Pkinase
Niben261Chr05g1330001	212.998	167.425	160.018	364.732	324.551	368.596	180.147	352.626	-0.965463	1.64185e-11	9.81121e-10	Niben261Chr05g1330001	Niben261Chr05	132987200	132993352	+	1728	protein_coding	- && sp|Q9LQL2|PTR14_ARATH Protein NRT1/ PTR FAMILY 7.3 OS=Arabidopsis thaliana OX=3702 GN=NPF7.3 PE=1 SV=2 && PF00854:POT family	-
Niben261Chr10g0228013	7043.06	6873.3	7385.62	5450.66	5441.35	4821.42	7100.66	5237.81	0.439059	1.72558e-11	1.02961e-09	Niben261Chr10g0228013	Niben261Chr10	22734139	22734582	+	444	protein_coding	- && sp|Q9S7N7|PSAG_ARATH Photosystem I reaction center subunit V, chloroplastic OS=Arabidopsis thaliana OX=3702 GN=PSAG PE=1 SV=1 && PF01241:Photosystem I psaG / psaK	-
Niben261Chr19g0181007	1556.01	1378.21	1334.86	2121.64	1972.65	2025.84	1423.03	2040.04	-0.51881	1.73148e-11	1.03157e-09	Niben261Chr19g0181007	Niben261Chr19	18159743	18166966	-	1368	protein_coding	- && sp|Q8S4Y1|THIC1_ARATH Acetyl-CoA acetyltransferase, cytosolic 1 OS=Arabidopsis thaliana OX=3702 GN=AAT1 PE=1 SV=1 && PF00108:Thiolase, N-terminal domain|PF02803:Thiolase, C-terminal domain	Thiolase_N
Niben261Chr19g1336006	49.0083	54.33	41.295	147.054	127.676	133.077	48.2111	135.936	-1.49732	1.75005e-11	1.03965e-09	Niben261Chr19g1336006	Niben261Chr19	133681398	133683719	-	1620	protein_coding	- && sp|Q40577|5EAS_TOBAC 5-epi-aristolochene synthase OS=Nicotiana tabacum OX=4097 GN=EAS3 PE=1 SV=3 && PF03936:Terpene synthase family, metal binding domain|PF01397:Terpene synthase, N-terminal domain	-
Niben261Chr12g0084003	1146.98	1047.79	1184.14	737.203	720.25	800.379	1126.3	752.611	0.582078	1.75028e-11	1.03965e-09	Niben261Chr12g0084003	Niben261Chr12	8418577	8426007	+	804	protein_coding	- && sp|Q6ER94|BAS1_ORYSJ 2-Cys peroxiredoxin BAS1, chloroplastic OS=Oryza sativa subsp. japonica OX=39947 GN=BAS1 PE=1 SV=1 && PF00578:AhpC/TSA family|PF10417:C-terminal domain of 1-Cys peroxiredoxin	-
Niben261Chr13g1145012	6765.03	7016.34	6356.34	4973.7	4436.51	5167.04	6712.57	4859.08	0.466088	1.75379e-11	1.04017e-09	Niben261Chr13g1145012	Niben261Chr13	114537391	114538848	-	1458	protein_coding	- && sp|Q43364|EFTUB_NICSY Elongation factor TuB, chloroplastic OS=Nicotiana sylvestris OX=4096 GN=TUFB PE=2 SV=1 && PF03143:Elongation factor Tu C-terminal domain|PF00009:Elongation factor Tu GTP binding domain|PF03144:Elongation factor Tu domain 2	GTP_EFTU
Niben261Chr06g1367002	575.847	506.711	495.541	832.982	905.429	775.487	526.033	837.966	-0.670245	1.76105e-11	1.04292e-09	Niben261Chr06g1367002	Niben261Chr06	136734500	136739828	+	1509	protein_coding	- && sp|Q9ASQ5|CRCK3_ARATH Calmodulin-binding receptor-like cytoplasmic kinase 3 OS=Arabidopsis thaliana OX=3702 GN=CRCK3 PE=2 SV=1 && PF07714:Protein tyrosine kinase	Pkinase_Tyr
Niben261Chr04g1894020	1263.85	1025.62	1260.53	699.472	717.326	820.484	1183.33	745.761	0.66691	2.12409e-11	1.25603e-09	Niben261Chr04g1894020	Niben261Chr04	189449371	189450666	-	1296	protein_coding	- && sp|Q9M0B6|GAE1_ARATH UDP-glucuronate 4-epimerase 1 OS=Arabidopsis thaliana OX=3702 GN=GAE1 PE=1 SV=1 && PF16363:GDP-mannose 4,6 dehydratase	-
novel.5968	793.557	767.273	764.991	1147.41	1151.04	1081.85	775.274	1126.76	-0.538984	2.18521e-11	1.29025e-09	-	Niben261Chr16	88238957	88240559	-	1021	-	- && Q03662.1 RecName: Full=Probable glutathione S-transferase; AltName: Full=Auxin-induced protein PGNT1/PCNT110 && PF02798:Glutathione S-transferase, N-terminal domain	GST_N
Niben261Chr07g0996012	432.592	415.791	362.364	211.873	209.545	243.177	403.582	221.532	0.865579	2.28104e-11	1.34483e-09	Niben261Chr07g0996012	Niben261Chr07	99597098	99603107	+	1059	protein_coding	- && sp|Q67ZU1|LIP2_ARATH Triacylglycerol lipase 2 OS=Arabidopsis thaliana OX=3702 GN=LIP2 PE=2 SV=1 && PF04083:Partial alpha/beta-hydrolase lipase region	-
Niben261Chr18g1462006	2004.63	1985.82	2117.4	2657.61	2839.09	2772.6	2035.95	2756.43	-0.437058	2.33467e-11	1.3744e-09	Niben261Chr18g1462006	Niben261Chr18	146242864	146254672	+	1236	protein_coding	- && sp|A7S4N4|SERIC_NEMVE Probable serine incorporator OS=Nematostella vectensis OX=45351 GN=serinc PE=3 SV=1 && PF03348:Serine incorporator (Serinc)	TMS_TDE
Niben261Chr18g1157005	879.322	885.912	815.577	512.753	613.041	485.397	860.27	537.064	0.679908	2.39608e-11	1.40846e-09	Niben261Chr18g1157005	Niben261Chr18	115680327	115682144	-	1818	protein_coding	- && sp|Q9C6T2|PPR68_ARATH Pentatricopeptide repeat-containing protein At1g31920 OS=Arabidopsis thaliana OX=3702 GN=PCMP-H11 PE=2 SV=1 && PF14432:DYW family of nucleic acid deaminases|PF13041:PPR repeat family	-
Niben261Chr03g0782004	1058.39	1102.12	1157.29	726.561	642.28	792.72	1105.94	720.52	0.617703	2.41248e-11	1.41584e-09	Niben261Chr03g0782004	Niben261Chr03	78213545	78215312	+	852	protein_coding	- && sp|Q6EU94|PIP11_ORYSJ Aquaporin PIP1-1 OS=Oryza sativa subsp. japonica OX=39947 GN=PIP1-1 PE=2 SV=1 && PF00230:Major intrinsic protein	-
Niben261Chr11g1025008	313.841	294.934	235.382	489.534	504.857	494.014	281.386	496.135	-0.817133	2.41579e-11	1.41584e-09	Niben261Chr11g1025008	Niben261Chr11	102556569	102559993	-	2865	protein_coding	- && sp|O22938|PXC3_ARATH Leucine-rich repeat receptor-like tyrosine-protein kinase PXC3 OS=Arabidopsis thaliana OX=3702 GN=PXC3 PE=2 SV=1 && PF07714:Protein tyrosine kinase|PF13855:Leucine rich repeat	Pkinase_Tyr
Niben261Chr04g0195007	2061.18	2084.5	1995.58	1431.84	1364.48	1568.21	2047.09	1454.84	0.492562	2.43342e-11	1.42329e-09	Niben261Chr04g0195007	Niben261Chr04	19549694	19555199	+	1194	protein_coding	- && sp|Q42946|HEM6_TOBAC Oxygen-dependent coproporphyrinogen-III oxidase, chloroplastic OS=Nicotiana tabacum OX=4097 GN=CPX PE=2 SV=1 && PF01218:Coproporphyrinogen III oxidase	-
Niben261Chr11g0263004	1702.1	1746.32	1755.04	1215.13	1209.51	1307.8	1734.49	1244.15	0.47911	2.43567e-11	1.42329e-09	Niben261Chr11g0263004	Niben261Chr11	26296395	26302800	+	1494	protein_coding	- && sp|Q8LDW9|XTH9_ARATH Xyloglucan endotransglucosylase/hydrolase protein 9 OS=Arabidopsis thaliana OX=3702 GN=XTH9 PE=2 SV=2 && PF06955:Xyloglucan endo-transglycosylase (XET) C-terminus|PF00722:Glycosyl hydrolases family 16	-
novel.5103	34.8713	46.5686	49.5541	134.477	141.321	112.972	43.6646	129.59	-1.57463	2.47709e-11	1.44536e-09	-	Niben261Chr14	148280561	148282733	+	597	-	- && - && -	-
Niben261Chr11g1088014	311.957	270.541	268.418	516.623	559.436	439.442	283.639	505.167	-0.830742	2.64875e-11	1.54325e-09	Niben261Chr11g1088014	Niben261Chr11	108803476	108807083	-	1488	protein_coding	- && sp|P28583|CDPK_SOYBN Calcium-dependent protein kinase SK5 OS=Glycine max OX=3847 PE=1 SV=1 && PF13499:EF-hand domain pair|PF00069:Protein kinase domain	Pkinase
Niben261Chr19g1250015	3332.56	2760.85	2297.04	5514.51	6008.58	5660.1	2796.82	5727.73	-1.034	2.68403e-11	1.56151e-09	Niben261Chr19g1250015	Niben261Chr19	124975750	124982990	-	4209	protein_coding	- && sp|Q949G3|PDR1_NICPL Pleiotropic drug resistance protein 1 OS=Nicotiana plumbaginifolia OX=4092 GN=PDR1 PE=1 SV=1 && PF00005:ABC transporter|PF08370:Plant PDR ABC transporter associated|PF01061:ABC-2 type transporter	ABC2_membrane
Niben261Chr14g1074001	2933.9	2383.87	2623.27	3665.7	3880.97	3733.82	2647.01	3760.16	-0.505675	2.75641e-11	1.60127e-09	Niben261Chr14g1074001	Niben261Chr14	107390545	107394412	-	1494	protein_coding	- && sp|Q8S9J6|ASPA_ARATH Aspartyl protease family protein At5g10770 OS=Arabidopsis thaliana OX=3702 GN=At5g10770 PE=2 SV=1 && PF14541:Xylanase inhibitor C-terminal|PF14543:Xylanase inhibitor N-terminal	-
Niben261Chr16g0033004	18053	17379	16928.9	13344.2	12158.5	13864	17453.6	13122.2	0.411535	2.82793e-11	1.64041e-09	Niben261Chr16g0033004	Niben261Chr16	3317382	3320063	+	906	protein_coding	- && sp|Q944G9|ALFP2_ARATH Fructose-bisphosphate aldolase 2, chloroplastic OS=Arabidopsis thaliana OX=3702 GN=FBA2 PE=1 SV=2 && PF00274:Fructose-bisphosphate aldolase class-I	-
Niben261Chr04g0298005	49.0083	44.351	45.4246	165.435	141.321	107.228	46.2613	137.995	-1.57463	2.86721e-11	1.66076e-09	Niben261Chr04g0298005	Niben261Chr04	29855093	29856752	-	561	protein_coding	- && - && PF06521:PAR1 protein	-
Niben261Scf00752g0000010	12.2521	14.4141	15.4856	73.5268	64.3254	70.8469	14.0506	69.5664	-2.31195	2.89474e-11	1.67426e-09	Niben261Scf00752g0000010	Niben261Scf00752	3	1190	-	762	protein_coding	- && sp|Q42381|HLS1_ARATH Probable N-acetyltransferase HLS1 OS=Arabidopsis thaliana OX=3702 GN=HLS1 PE=1 SV=1 && PF00583:Acetyltransferase (GNAT) family	Acetyltransf_1
Niben261Chr07g1009008	204.515	166.316	144.533	318.294	355.739	342.746	171.788	338.926	-0.977068	3.03979e-11	1.75559e-09	Niben261Chr07g1009008	Niben261Chr07	100983793	100988372	+	1890	protein_coding	- && sp|Q9FYH7|VSR6_ARATH Vacuolar-sorting receptor 6 OS=Arabidopsis thaliana OX=3702 GN=VSR6 PE=2 SV=3 && PF02225:PA domain	-
Niben261Chr02g0713001	8159.88	7700.45	7924.52	6160.77	5766.87	6256.55	7928.28	6061.4	0.387456	3.09923e-11	1.78672e-09	Niben261Chr02g0713001	Niben261Chr02	71316430	71321921	-	1431	protein_coding	- && sp|Q9S7E9|GGT2_ARATH Glutamate--glyoxylate aminotransferase 2 OS=Arabidopsis thaliana OX=3702 GN=GGAT2 PE=1 SV=1 && PF00155:Aminotransferase class I and II	Aminotran_1_2
Niben261Chr10g0042037	131.945	128.618	129.047	43.5356	47.7568	49.7843	129.87	47.0256	1.46571	3.10271e-11	1.78672e-09	Niben261Chr10g0042037	Niben261Chr10	4232336	4238013	-	1041	protein_coding	- && sp|Q9LSE7|B561C_ARATH Cytochrome b561 and DOMON domain-containing protein At3g25290 OS=Arabidopsis thaliana OX=3702 GN=At3g25290 PE=2 SV=1 && PF04526:Protein of unknown function (DUF568)	-
Niben261Chr19g1043001	658.784	665.266	639.041	393.756	410.318	440.4	654.364	414.825	0.657413	3.16645e-11	1.81912e-09	Niben261Chr19g1043001	Niben261Chr19	104249914	104255474	-	1860	protein_coding	- && sp|Q9C533|ZDHC1_ARATH Probable protein S-acyltransferase 22 OS=Arabidopsis thaliana OX=3702 GN=PAT22 PE=2 SV=2 && PF01529:DHHC palmitoyltransferase	-
Niben261Chr11g0748001	432.592	415.791	458.375	237.027	187.129	272.856	435.586	232.337	0.906527	3.16816e-11	1.81912e-09	Niben261Chr11g0748001	Niben261Chr11	74822403	74824059	+	1335	protein_coding	- && - && PF06219:Protein of unknown function (DUF1005)	-
Niben261Chr05g0698012	51635.9	48829.4	50035.1	38943.1	36575.8	40526.4	50166.8	38681.8	0.375094	3.26082e-11	1.86962e-09	Niben261Chr05g0698012	Niben261Chr05	69831747	69834732	-	1155	protein_coding	- && sp|P09043|G3PA_TOBAC Glyceraldehyde-3-phosphate dehydrogenase A, chloroplastic (Fragment) OS=Nicotiana tabacum OX=4097 GN=GAPA PE=2 SV=1 && PF02800:Glyceraldehyde 3-phosphate dehydrogenase, C-terminal domain|PF00044:Glyceraldehyde 3-phosphate dehydrogenase, NAD binding domain	-
Niben261Chr09g0782008	1068.76	1089.93	1045.8	747.845	661.772	751.552	1068.16	720.39	0.568024	3.31521e-11	1.89805e-09	Niben261Chr09g0782008	Niben261Chr09	78226514	78255435	-	3771	protein_coding	- && sp|F4IFF3|MCM9_ARATH Probable DNA helicase MCM9 OS=Arabidopsis thaliana OX=3702 GN=MCM9 PE=3 SV=1 && PF00331:Glycosyl hydrolase family 10|PF01040:UbiA prenyltransferase family|PF00493:MCM P-loop domain|PF17207:MCM OB domain|PF02018:Carbohydrate binding domain	MCM
Niben261Chr10g0551001	237.502	212.885	231.252	432.454	465.872	358.064	227.213	418.797	-0.880626	3.37523e-11	1.92963e-09	Niben261Chr10g0551001	Niben261Chr10	55139795	55141992	+	1464	protein_coding	- && sp|O65782|C83B1_ARATH Cytochrome P450 83B1 OS=Arabidopsis thaliana OX=3702 GN=CYP83B1 PE=1 SV=1 && PF00067:Cytochrome P450	p450
Niben261Chr08g0072005	1241.23	1168.65	1150.07	849.428	820.637	786.975	1186.65	819.013	0.535459	3.41597e-11	1.95011e-09	Niben261Chr08g0072005	Niben261Chr08	7266247	7269712	+	1365	protein_coding	- && sp|Q944I4|GLYK_ARATH D-glycerate 3-kinase, chloroplastic OS=Arabidopsis thaliana OX=3702 GN=GLYK PE=1 SV=2 && -	-
Niben261Chr11g1413017	1457.05	1478	1577.47	1122.25	986.323	1021.54	1504.17	1043.37	0.527592	3.45483e-11	1.96748e-09	Niben261Chr11g1413017	Niben261Chr11	141272490	141281072	+	1656	protein_coding	- && sp|Q23892|GLUA_DICDI Lysosomal beta glucosidase OS=Dictyostelium discoideum OX=44689 GN=gluA PE=1 SV=2 && PF01915:Glycosyl hydrolase family 3 C-terminal domain|PF00933:Glycosyl hydrolase family 3 N terminal domain	Glyco_hydro_3
Niben261Chr12g1194005	253.524	230.625	202.346	436.324	396.673	401.147	228.832	411.381	-0.84465	3.45633e-11	1.96748e-09	Niben261Chr12g1194005	Niben261Chr12	119432183	119433909	-	573	protein_coding	- && sp|Q96262|PCAP1_ARATH Plasma membrane-associated cation-binding protein 1 OS=Arabidopsis thaliana OX=3702 GN=PCAP1 PE=1 SV=1 && PF05558:DREPP plasma membrane polypeptide	-
Niben261Chr12g0550021	460.866	513.363	540.965	798.153	779.702	770.7	505.065	782.852	-0.633522	3.50293e-11	1.99114e-09	Niben261Chr12g0550021	Niben261Chr12	55071649	55084291	-	1431	protein_coding	- && - && -	-
Niben261Chr19g1221014	1745.45	1866.07	1469.07	636.588	448.329	738.148	1693.53	607.688	1.4785	3.53743e-11	2.00787e-09	Niben261Chr19g1221014	Niben261Chr19	121726112	121729376	-	1182	protein_coding	- && sp|P27496|CB25_TOBAC Chlorophyll a-b binding protein 50, chloroplastic OS=Nicotiana tabacum OX=4097 GN=CAB50 PE=2 SV=1 && PF00504:Chlorophyll A-B binding protein	-
Niben261Chr04g1644021	990.533	903.653	820.739	1415.39	1387.87	1265.67	904.975	1356.31	-0.582884	3.7127e-11	2.10347e-09	Niben261Chr04g1644021	Niben261Chr04	164445659	164447783	+	1857	protein_coding	- && sp|Q9ASS4|Y5838_ARATH Probably inactive leucine-rich repeat receptor-like protein kinase At5g48380 OS=Arabidopsis thaliana OX=3702 GN=At5g48380 PE=1 SV=1 && PF07714:Protein tyrosine kinase	Pkinase_Tyr
Niben261Chr06g0379003	4533.27	4572.59	4777.84	3690.85	3275.72	3242.68	4627.9	3403.09	0.443492	3.71647e-11	2.10347e-09	Niben261Chr06g0379003	Niben261Chr06	37845846	37847451	+	387	protein_coding	- && sp|P16048|GCSH_PEA Glycine cleavage system H protein, mitochondrial OS=Pisum sativum OX=3888 GN=GDCSH PE=1 SV=1 && PF01597:Glycine cleavage H-protein	-
Niben261Chr03g0041005	1158.29	1250.7	1015.86	762.357	692.96	772.615	1141.62	742.644	0.619846	4.18087e-11	2.36294e-09	Niben261Chr03g0041005	Niben261Chr03	4090507	4093283	+	1431	protein_coding	- && sp|P05522|GUN1_PERAE Endoglucanase 1 OS=Persea americana OX=3435 GN=CEL1 PE=2 SV=1 && PF00759:Glycosyl hydrolase family 9	-
Niben261Chr18g1232003	61.2604	51.0037	45.4246	7.73967	7.79702	0	52.5629	5.1789	3.34963	4.25421e-11	2.40096e-09	Niben261Chr18g1232003	Niben261Chr18	123252391	123253287	-	393	protein_coding	- && sp|P41129|RL132_BRANA 60S ribosomal protein L13-2 OS=Brassica napus OX=3708 PE=2 SV=1 && PF01294:Ribosomal protein L13e	-
Niben261Chr14g0997006	815.234	842.67	727.825	1184.17	1160.78	1154.61	795.243	1166.52	-0.552986	4.42109e-11	2.4916e-09	Niben261Chr14g0997006	Niben261Chr14	99687349	99690198	+	1563	protein_coding	- && sp|O64851|IQM4_ARATH IQ domain-containing protein IQM4 OS=Arabidopsis thaliana OX=3702 GN=IQM4 PE=2 SV=1 && -	-
Niben261Chr14g1410001	4010.2	3945.03	3795.01	3052.33	2804	2977.49	3916.75	2944.61	0.411625	4.52456e-11	2.54484e-09	Niben261Chr14g1410001	Niben261Chr14	140999091	141001618	+	921	protein_coding	- && sp|O22436|CHLI_TOBAC Magnesium-chelatase subunit ChlI, chloroplastic OS=Nicotiana tabacum OX=4097 GN=CHLI PE=2 SV=1 && PF17863:AAA lid domain	-
Niben261Chr07g1383002	3635.09	3442.75	3352.13	2578.28	2674.38	2584	3476.66	2612.22	0.412685	4.52842e-11	2.54484e-09	Niben261Chr07g1383002	Niben261Chr07	138251712	138252824	+	1113	protein_coding	- && sp|P29790|ATPG_TOBAC ATP synthase gamma chain, chloroplastic OS=Nicotiana tabacum OX=4097 GN=ATPC PE=1 SV=1 && PF00231:ATP synthase	-
Niben261Chr02g0744003	443.902	450.163	392.303	826.209	809.916	603.156	428.789	746.427	-0.799622	4.71762e-11	2.64741e-09	Niben261Chr02g0744003	Niben261Chr02	74450608	74454729	+	1365	protein_coding	- && sp|O80763|NRX1_ARATH Probable nucleoredoxin 1 OS=Arabidopsis thaliana OX=3702 GN=At1g60420 PE=1 SV=1 && PF13905:Thioredoxin-like	-
Niben261Chr19g0873004	187.551	205.124	192.022	386.016	315.779	383.914	194.899	361.903	-0.894292	4.79796e-11	2.68869e-09	Niben261Chr19g0873004	Niben261Chr19	87355634	87357618	+	1500	protein_coding	- && sp|Q9LPV5|NRT25_ARATH High affinity nitrate transporter 2.5 OS=Arabidopsis thaliana OX=3702 GN=NRT2.5 PE=1 SV=1 && PF07690:Major Facilitator Superfamily	MFS_1
Niben261Chr01g0054008	5984.67	5749	5832.93	4637.03	4522.27	4241.24	5855.53	4466.85	0.390678	4.80848e-11	2.69078e-09	Niben261Chr01g0054008	Niben261Chr01	5434385	5436942	+	1200	protein_coding	- && sp|Q9SDT1|POR_DAUCA Protochlorophyllide reductase, chloroplastic OS=Daucus carota OX=4039 GN=POR1 PE=2 SV=1 && PF00106:short chain dehydrogenase	adh_short
novel.853	39.5836	41.0247	59.8778	0	2.92388	5.74435	46.8287	2.88941	4.01423	4.88192e-11	2.72803e-09	-	Niben261Chr03	71508788	71510439	+	1592	-	- && - && -	-
novel.3988	153.622	140.815	104.27	45.4705	45.8075	45.9548	132.902	45.7443	1.53977	4.97383e-11	2.77492e-09	-	Niben261Chr11	116734620	116738314	+	3695	-	- && - && -	-
Niben261Chr08g0314003	165.874	154.12	166.213	391.821	388.876	254.666	162.069	345.121	-1.08942	4.97984e-11	2.77492e-09	Niben261Chr08g0314003	Niben261Chr08	31482388	31484435	-	705	protein_coding	- && sp|Q9FTA0|GEML4_ARATH GEM-like protein 4 OS=Arabidopsis thaliana OX=3702 GN=At5g08350 PE=2 SV=1 && PF02893:GRAM domain	GRAM
Niben261Chr05g0362003	48.0658	51.0037	45.4246	0	0	0	48.1647	0	8.08134	5.0558e-11	2.81328e-09	Niben261Chr05g0362003	Niben261Chr05	36242513	36242866	+	348	protein_coding	- && - && -	-
Niben261Chr04g0868003	10580.1	10878.2	10226.7	8300.79	7544.59	8288.13	10561.7	8044.51	0.392709	5.11389e-11	2.84161e-09	Niben261Chr04g0868003	Niben261Chr04	86851296	86856678	-	1254	protein_coding	- && sp|P29344|RR1_SPIOL 30S ribosomal protein S1, chloroplastic OS=Spinacia oleracea OX=3562 GN=RPS1 PE=1 SV=1 && PF00575:S1 RNA binding domain	S1
Niben261Chr14g0615001	13.1945	14.4141	6.19426	79.3316	56.5284	61.273	11.2676	65.711	-2.54518	5.18214e-11	2.87551e-09	Niben261Chr14g0615001	Niben261Chr14	61532467	61535368	+	552	protein_coding	- && sp|Q9SXZ2|FT_ARATH Protein FLOWERING LOCUS T OS=Arabidopsis thaliana OX=3702 GN=FT PE=1 SV=2 && PF01161:Phosphatidylethanolamine-binding protein	-
Niben261Chr06g0436008	366.62	321.545	338.619	540.809	576.005	555.287	342.261	557.367	-0.701748	5.20787e-11	2.88574e-09	Niben261Chr06g0436008	Niben261Chr06	43617559	43625595	+	2217	protein_coding	- && sp|P46607|HGL2_ARATH Homeobox-leucine zipper protein GLABRA 2 OS=Arabidopsis thaliana OX=3702 GN=GL2 PE=1 SV=3 && PF01852:START domain|PF00046:Homeodomain	START
Niben261Chr17g0693016	65935.9	62276.6	63785.4	52449.8	48458.5	47953.8	63999.3	49620.7	0.367131	5.2927e-11	2.92865e-09	Niben261Chr17g0693016	Niben261Chr17	69315619	69316536	-	543	protein_coding	- && sp|A0A0S4IJL0|RBS_NICBE Ribulose bisphosphate carboxylase small subunit, chloroplastic OS=Nicotiana benthamiana OX=4100 GN=rbcS PE=1 SV=1 && PF00101:Ribulose bisphosphate carboxylase, small chain|PF12338:Ribulose-1,5-bisphosphate carboxylase small subunit	-
Niben261Chr17g0838007	18387.5	17869	18580.7	14624.1	13411.9	14499.7	18279.1	14178.5	0.366502	5.40262e-11	2.98531e-09	Niben261Chr17g0838007	Niben261Chr17	83798068	83802358	-	1293	protein_coding	- && sp|O22506|GLNA2_DAUCA Glutamine synthetase, chloroplastic OS=Daucus carota OX=4039 GN=GLN2 PE=2 SV=1 && PF00120:Glutamine synthetase, catalytic domain|PF03951:Glutamine synthetase, beta-Grasp domain	-
Niben261Chr18g0559010	11667.7	10546.7	10828.6	8724.54	8119.62	8289.09	11014.3	8377.75	0.394889	5.41534e-11	2.98817e-09	Niben261Chr18g0559010	Niben261Chr18	55887881	55891654	+	1746	protein_coding	- && sp|Q42961|PGKH_TOBAC Phosphoglycerate kinase, chloroplastic OS=Nicotiana tabacum OX=4097 PE=2 SV=1 && PF00162:Phosphoglycerate kinase	-
Niben261Chr03g1667004	1880.22	1803.98	1637.35	1257.7	1210.49	1285.78	1773.85	1251.32	0.50366	5.51289e-11	3.03776e-09	Niben261Chr03g1667004	Niben261Chr03	166773593	166784494	-	2622	protein_coding	- && sp|F4IY62|UGPA3_ARATH UTP--glucose-1-phosphate uridylyltransferase 3, chloroplastic OS=Arabidopsis thaliana OX=3702 GN=UGP3 PE=1 SV=1 && -	-
Niben261Chr09g0714012	147.025	144.141	171.374	320.229	332.348	264.24	154.18	305.606	-0.986748	5.52212e-11	3.03862e-09	Niben261Chr09g0714012	Niben261Chr09	71387478	71393573	+	1881	protein_coding	- && sp|F4HVY0|CER1_ARATH Very-long-chain aldehyde decarbonylase CER1 OS=Arabidopsis thaliana OX=3702 GN=CER1 PE=1 SV=1 && PF04116:Fatty acid hydroxylase superfamily|PF12076:WAX2 C-terminal domain	-
Niben261Chr05g0165008	1802	1736.34	1652.83	2373.18	2304.99	2358.05	1730.39	2345.41	-0.438458	5.71001e-11	3.13765e-09	Niben261Chr05g0165008	Niben261Chr05	16531959	16545678	-	1086	protein_coding	- && sp|Q9SZ83|Y4967_ARATH Uncharacterized oxidoreductase At4g09670 OS=Arabidopsis thaliana OX=3702 GN=At4g09670 PE=1 SV=1 && PF01408:Oxidoreductase family, NAD-binding Rossmann fold	GFO_IDH_MocA
Niben261Chr04g0512013	1320.4	1300.59	1351.38	937.467	939.541	951.647	1324.12	942.885	0.48997	5.72977e-11	3.14415e-09	Niben261Chr04g0512013	Niben261Chr04	51175465	51180738	-	1584	protein_coding	- && sp|Q9FFZ1|PPH_ARATH Pheophytinase, chloroplastic OS=Arabidopsis thaliana OX=3702 GN=PPH PE=1 SV=1 && PF12697:Alpha/beta hydrolase family	-
Niben261Chr09g0253006	2002.74	2126.63	2106.05	1576.96	1499.95	1364.28	2078.47	1480.4	0.489314	5.81021e-11	3.18388e-09	Niben261Chr09g0253006	Niben261Chr09	25289569	25291767	-	813	protein_coding	- && sp|Q08935|ROC1_NICSY 29 kDa ribonucleoprotein A, chloroplastic OS=Nicotiana sylvestris OX=4096 PE=2 SV=1 && PF00076:RNA recognition motif. (a.k.a. RRM, RBD, or RNP domain)	RRM_1
Niben261Chr14g1360006	445.787	302.696	278.742	925.858	1289.43	1084.72	342.408	1100	-1.68267	5.82666e-11	3.18849e-09	Niben261Chr14g1360006	Niben261Chr14	136020926	136021672	-	747	protein_coding	- && sp|P14170|OSMO_TOBAC Osmotin OS=Nicotiana tabacum OX=4097 GN=AP24 PE=1 SV=2 && PF00314:Thaumatin family	Thaumatin
novel.5726	3250.57	3447.18	3434.72	2641.16	2351.78	2491.13	3377.49	2494.69	0.436844	5.97383e-11	3.26451e-09	-	Niben261Chr16	41928135	41930025	+	725	-	- && P36688.1 RecName: Full=50S ribosomal protein L12, chloroplastic; AltName: Full=CL12; Flags: Precursor && PF00542:Ribosomal protein L7/L12 C-terminal domain|PF16320:Ribosomal protein L7/L12 dimerisation domain	-
Niben261Scf03882g0000005	2742.58	2290.73	2434.34	1690.15	1730.94	1826.7	2489.22	1749.26	0.509597	6.16542e-11	3.36457e-09	Niben261Scf03882g0000005	Niben261Scf03882	1	1745	-	867	protein_coding	- && sp|Q42961|PGKH_TOBAC Phosphoglycerate kinase, chloroplastic OS=Nicotiana tabacum OX=4097 PE=2 SV=1 && PF00162:Phosphoglycerate kinase	-
novel.4134	164.932	162.99	120.788	314.424	288.49	292.004	149.57	298.306	-0.995479	6.24863e-11	3.40529e-09	-	Niben261Chr11	93385644	93395591	-	2412	-	- && Q940Q4.2 RecName: Full=RING-H2 finger protein ATL13; AltName: Full=RING-type E3 ubiquitin transferase ATL13 && -	-
Niben261Scf00333g0000002	4052.61	4132.41	4130.54	5229.11	5476.43	5206.29	4105.18	5303.95	-0.369685	6.84004e-11	3.72247e-09	Niben261Scf00333g0000002	Niben261Scf00333	9668	10651	-	387	protein_coding	- && sp|P27082|SODC_NICPL Superoxide dismutase [Cu-Zn] OS=Nicotiana plumbaginifolia OX=4092 GN=SODCC PE=2 SV=2 && PF00080:Copper/zinc superoxide dismutase (SODC)	-
Niben261Chr16g0290005	6350.34	6580.59	6270.65	5046.26	4738.64	5020.56	6400.53	4935.15	0.374987	6.89143e-11	3.74529e-09	Niben261Chr16g0290005	Niben261Chr16	28975186	28980939	+	1215	protein_coding	- && sp|Q9ST69|RR5_SPIOL 30S ribosomal protein S5, chloroplastic OS=Spinacia oleracea OX=3562 GN=rps5 PE=1 SV=1 && PF03719:Ribosomal protein S5, C-terminal domain|PF00333:Ribosomal protein S5, N-terminal domain	-
Niben261Chr07g1508002	741.721	736.227	761.894	1053.56	1122.77	1060.79	746.614	1079.04	-0.531213	6.90486e-11	3.74745e-09	Niben261Chr07g1508002	Niben261Chr07	150803244	150809560	+	1443	protein_coding	- && sp|P37830|G6PD_SOLTU Glucose-6-phosphate 1-dehydrogenase, cytoplasmic isoform OS=Solanum tuberosum OX=4113 GN=G6PDH PE=1 SV=1 && PF02781:Glucose-6-phosphate dehydrogenase, C-terminal domain|PF00479:Glucose-6-phosphate dehydrogenase, NAD binding domain	G6PD_C
Niben261Chr03g0320012	1244.06	941.351	747.44	2888.83	2726.03	2441.35	977.616	2685.4	-1.45742	6.93993e-11	3.76133e-09	Niben261Chr03g0320012	Niben261Chr03	32064615	32066054	+	858	protein_coding	- && sp|Q43792|ACCO_TOBAC 1-aminocyclopropane-1-carboxylate oxidase OS=Nicotiana tabacum OX=4097 GN=ACO PE=2 SV=1 && PF03171:2OG-Fe(II) oxygenase superfamily	2OG-FeII_Oxy
novel.6030	18.8493	8.87021	8.25901	64.8197	87.7165	56.4861	11.9929	69.6741	-2.51809	7.03911e-11	3.80987e-09	-	Niben261Chr17	1635188	1636007	+	820	-	- && - && PF05699:hAT family C-terminal dimerisation region	hATC
Niben261Chr07g0166005	1062.16	1124.3	1203.75	717.854	781.651	795.592	1130.07	765.032	0.562373	7.18529e-11	3.88369e-09	Niben261Chr07g0166005	Niben261Chr07	16579520	16580781	+	477	protein_coding	- && sp|P33050|PSC13_MAIZE Pollen-specific protein C13 OS=Zea mays OX=4577 GN=MGS1 PE=2 SV=1 && PF01190:Pollen proteins Ole e I like	-
Niben261Chr03g0053001	99.9015	89.8109	102.205	182.85	222.215	248.922	97.3059	217.995	-1.16229	7.21449e-11	3.89248e-09	Niben261Chr03g0053001	Niben261Chr03	5301354	5308859	+	1275	protein_coding	- && sp|P22503|GUN_PHAVU Endoglucanase OS=Phaseolus vulgaris OX=3885 PE=2 SV=2 && PF00759:Glycosyl hydrolase family 9	-
Niben261Chr15g1411014	8572.68	7745.91	8195	10763.9	10693.6	10374.3	8171.2	10610.6	-0.37668	7.22122e-11	3.89248e-09	Niben261Chr15g1411014	Niben261Chr15	141123804	141125652	-	864	protein_coding	- && sp|P43287|PIP22_ARATH Aquaporin PIP2-2 OS=Arabidopsis thaliana OX=3702 GN=PIP2-2 PE=1 SV=2 && PF00230:Major intrinsic protein	-
Niben261Chr10g0513003	508.932	354.808	271.515	1308	1600.34	1240.78	378.418	1383.04	-1.86902	7.49917e-11	4.03681e-09	Niben261Chr10g0513003	Niben261Chr10	51353238	51355276	+	1431	protein_coding	- && sp|G5CV45|TPS32_SOLLC Viridiflorene synthase OS=Solanum lycopersicum OX=4081 GN=TPS32 PE=1 SV=1 && PF03936:Terpene synthase family, metal binding domain|PF01397:Terpene synthase, N-terminal domain	-
Niben261Chr07g1128061	13466	12330.7	12224.4	9872.91	8181.02	9382.43	12673.7	9145.46	0.470771	8.0533e-11	4.32922e-09	Niben261Chr07g1128061	Niben261Chr07	112792376	112793540	+	546	protein_coding	- && sp|P22433|RBS2_NICSY Ribulose bisphosphate carboxylase small subunit, chloroplastic 2 OS=Nicotiana sylvestris OX=4096 GN=RBCS2 PE=3 SV=1 && PF12338:Ribulose-1,5-bisphosphate carboxylase small subunit|PF00101:Ribulose bisphosphate carboxylase, small chain	-
novel.2488	81.0522	57.6564	64.0073	15.4793	10.7209	14.3609	67.5719	13.5204	2.32391	8.19241e-11	4.39804e-09	-	Niben261Chr07	66343771	66352024	+	2304	-	- && - && -	-
Niben261Chr19g1134024	4160.05	4192.28	4073.76	3263.24	2921.93	3159.39	4142.03	3114.85	0.411121	8.33713e-11	4.46967e-09	Niben261Chr19g1134024	Niben261Chr19	112972714	112977161	-	573	protein_coding	- && sp|P30155|RK27_TOBAC 50S ribosomal protein L27, chloroplastic OS=Nicotiana tabacum OX=4097 GN=RPL27 PE=1 SV=1 && PF01016:Ribosomal L27 protein	-
Niben261Chr18g0461001	7966.67	8383.46	7505.37	5950.84	5414.06	6224.96	7951.83	5863.28	0.439477	9.2096e-11	4.93075e-09	Niben261Chr18g0461001	Niben261Chr18	46142958	46149024	+	3126	protein_coding	- && sp|Q9SZD6|PETS_ARATH Polyprotein of EF-Ts, chloroplastic OS=Arabidopsis thaliana OX=3702 GN=PETs PE=1 SV=1 && PF00575:S1 RNA binding domain|PF00889:Elongation factor TS	S1
Niben261Chr02g0343012	4733.07	4620.27	4021.11	3077.49	2981.39	3418.84	4458.15	3159.24	0.496896	9.45723e-11	5.05649e-09	Niben261Chr02g0343012	Niben261Chr02	34256088	34269724	-	5652	protein_coding	- && sp|F4JKH6|TSS_ARATH Protein TSS OS=Arabidopsis thaliana OX=3702 GN=TSS PE=1 SV=1 && PF13424:Tetratricopeptide repeat|PF12807:Translation initiation factor eIF3 subunit 135|PF15044:Mitochondrial function, CLU-N-term	-
Niben261Chr08g0327001	417.513	355.917	391.271	579.508	645.204	658.685	388.234	627.799	-0.691556	9.58473e-11	5.11775e-09	Niben261Chr08g0327001	Niben261Chr08	32678527	32699953	+	2205	protein_coding	- && sp|Q9LD37|CNG20_ARATH Probable cyclic nucleotide-gated ion channel 20, chloroplastic OS=Arabidopsis thaliana OX=3702 GN=CNGC20 PE=2 SV=1 && PF00520:Ion transport protein	Ion_trans
Niben261Chr02g0159003	941.524	930.263	1117.03	588.215	489.263	695.066	996.273	590.848	0.753513	1.00496e-10	5.35876e-09	Niben261Chr02g0159003	Niben261Chr02	15936529	15938947	+	759	protein_coding	- && sp|Q41350|OLP1_SOLLC Osmotin-like protein OS=Solanum lycopersicum OX=4081 PE=1 SV=1 && PF00314:Thaumatin family	Thaumatin
Niben261Chr08g0781006	3979.1	3829.71	3996.33	3129.73	2930.71	2890.36	3935.05	2983.6	0.399474	1.03535e-10	5.51339e-09	Niben261Chr08g0781006	Niben261Chr08	78159892	78161926	-	1185	protein_coding	- && sp|P46283|S17P_ARATH Sedoheptulose-1,7-bisphosphatase, chloroplastic OS=Arabidopsis thaliana OX=3702 GN=At3g55800 PE=2 SV=1 && PF00316:Fructose-1-6-bisphosphatase, N-terminal domain	-
Niben261Chr03g1000007	237.502	248.366	260.159	457.608	428.836	396.36	248.675	427.601	-0.782597	1.04273e-10	5.54121e-09	Niben261Chr03g1000007	Niben261Chr03	100024262	100026153	+	1332	protein_coding	- && sp|Q9CAR3|KINGL_ARATH SNF1-related protein kinase regulatory subunit gamma-1-like OS=Arabidopsis thaliana OX=3702 GN=CBSCBS2 PE=1 SV=1 && PF00571:CBS domain	CBS
Niben261Chr11g1354002	147.025	125.292	131.112	280.563	287.515	239.348	134.476	269.142	-0.998288	1.04337e-10	5.54121e-09	Niben261Chr11g1354002	Niben261Chr11	135476102	135481580	+	828	protein_coding	- && sp|Q9C942|CSE_ARATH Caffeoylshikimate esterase OS=Arabidopsis thaliana OX=3702 GN=CSE PE=1 SV=1 && PF12146:Serine aminopeptidase, S33	-
novel.1327	2904.68	3022.52	2820.45	2054.88	1984.34	2296.78	2915.89	2112	0.465105	1.04478e-10	5.54127e-09	-	Niben261Chr04	92584755	92602696	+	1110	-	- && P36688.1 RecName: Full=50S ribosomal protein L12, chloroplastic; AltName: Full=CL12; Flags: Precursor && PF16320:Ribosomal protein L7/L12 dimerisation domain|PF00542:Ribosomal protein L7/L12 C-terminal domain	-
Niben261Chr17g0050004	213.94	180.731	192.022	411.17	453.202	303.493	195.564	389.288	-0.991015	1.04794e-10	5.55056e-09	Niben261Chr17g0050004	Niben261Chr17	5056801	5064412	+	630	protein_coding	- && sp|F4HWQ8|CVIF1_ARATH Cell wall / vacuolar inhibitor of fructosidase 1 OS=Arabidopsis thaliana OX=3702 GN=C/VIF1 PE=1 SV=1 && PF04043:Plant invertase/pectin methylesterase inhibitor	-
Niben261Chr09g1169030	111.211	116.421	122.853	274.758	345.018	197.223	116.828	272.333	-1.22123	1.06728e-10	5.64545e-09	Niben261Chr09g1169030	Niben261Chr09	116986500	116989279	-	1065	protein_coding	- && sp|Q9LDX3|UTR4_ARATH UDP-galactose/UDP-glucose transporter 4 OS=Arabidopsis thaliana OX=3702 GN=UTR4 PE=2 SV=1 && PF08449:UAA transporter family	-
Niben261Chr01g1101008	975.453	932.481	940.495	1326.39	1359.61	1306.84	949.476	1330.94	-0.486759	1.08984e-10	5.7571e-09	Niben261Chr01g1101008	Niben261Chr01	110104628	110110923	-	2493	protein_coding	- && sp|A0JJX5|SYT4_ARATH Synaptotagmin-4 OS=Arabidopsis thaliana OX=3702 GN=SYT4 PE=2 SV=1 && PF00168:C2 domain	C2
Niben261Chr10g0830001	1223.32	1170.87	1220.27	1612.75	1767.97	1645.76	1204.82	1675.49	-0.475379	1.0933e-10	5.76772e-09	Niben261Chr10g0830001	Niben261Chr10	82993986	83000561	+	1251	protein_coding	- && sp|Q8H107|ODO2B_ARATH Dihydrolipoyllysine-residue succinyltransferase component of 2-oxoglutarate dehydrogenase complex 2, mitochondrial OS=Arabidopsis thaliana OX=3702 GN=At4g26910 PE=1 SV=2 && PF00198:2-oxoacid dehydrogenases acyltransferase (catalytic domain)|PF00364:Biotin-requiring enzyme	Biotin_lipoyl
Niben261Chr06g0473004	376.044	376.984	368.558	224.45	210.52	210.626	373.862	215.199	0.796837	1.17979e-10	6.21377e-09	Niben261Chr06g0473004	Niben261Chr06	47254049	47254828	+	780	protein_coding	- && - && PF03168:Late embryogenesis abundant protein	-
Niben261Chr07g1230038	2010.28	2050.13	1731.29	1082.59	1110.1	1452.36	1930.57	1215.02	0.667888	1.18099e-10	6.21377e-09	Niben261Chr07g1230038	Niben261Chr07	122909578	122934982	+	2739	protein_coding	- && sp|F4IIU4|AIR9_ARATH 187-kDa microtubule-associated protein AIR9 OS=Arabidopsis thaliana OX=3702 GN=AIR9 PE=1 SV=1 && -	-
Niben261Chr04g1800001	820.889	659.722	781.509	1213.19	1261.17	1053.13	754.04	1175.83	-0.639362	1.18866e-10	6.24581e-09	Niben261Chr04g1800001	Niben261Chr04	179992114	180000889	+	1064	protein_coding	- && sp|Q9S7U9|M2K2_ARATH Mitogen-activated protein kinase kinase 2 OS=Arabidopsis thaliana OX=3702 GN=MKK2 PE=1 SV=2 && PF00069:Protein kinase domain	Pkinase
Niben261Chr15g0260006	574.905	534.43	737.117	329.903	331.373	384.871	615.484	348.716	0.819787	1.20703e-10	6.33394e-09	Niben261Chr15g0260006	Niben261Chr15	26032274	26034302	-	687	protein_coding	- && - && -	-
Niben261Chr06g1450020	2338.26	2459.27	2052.36	1505.37	1496.05	1713.73	2283.3	1571.72	0.538547	1.25863e-10	6.59599e-09	Niben261Chr06g1450020	Niben261Chr06	145030684	145046292	-	5715	protein_coding	- && sp|F4JKH6|TSS_ARATH Protein TSS OS=Arabidopsis thaliana OX=3702 GN=TSS PE=1 SV=1 && PF15044:Mitochondrial function, CLU-N-term|PF12807:Translation initiation factor eIF3 subunit 135|PF13424:Tetratricopeptide repeat	-
Niben261Chr01g1068001	305.359	307.131	333.458	182.85	173.484	152.225	315.316	169.52	0.895456	1.3086e-10	6.84881e-09	Niben261Chr01g1068001	Niben261Chr01	106864154	106875067	+	555	protein_coding	- && sp|Q9SZ54|GPX7_ARATH Putative glutathione peroxidase 7, chloroplastic OS=Arabidopsis thaliana OX=3702 GN=GPX7 PE=3 SV=2 && PF00255:Glutathione peroxidase	GSHPx
Niben261Chr07g1085002	82.9371	92.0284	86.7196	190.589	219.291	175.203	87.2284	195.028	-1.16234	1.31702e-10	6.88379e-09	Niben261Chr07g1085002	Niben261Chr07	108482199	108496352	+	2313	protein_coding	- && sp|Q8GW96|AATP3_ARATH AAA-ATPase At2g18193 OS=Arabidopsis thaliana OX=3702 GN=At2g18193 PE=2 SV=1 && PF14363:Domain associated at C-terminal with AAA|PF00004:ATPase family associated with various cellular activities (AAA)	AAA
Niben261Chr15g1460012	100.844	95.3547	85.6872	192.524	205.646	209.669	93.962	202.613	-1.10742	1.34212e-10	6.99899e-09	Niben261Chr15g1460012	Niben261Chr15	146072926	146087181	+	1152	protein_coding	- && sp|O65573|Y5872_ARATH SMR domain-containing protein At5g58720 OS=Arabidopsis thaliana OX=3702 GN=PIPC PE=1 SV=1 && PF08590:Domain of unknown function (DUF1771)	-
Niben261Chr14g1532011	4881.98	4825.39	5254.79	6697.71	6241.52	6773.54	4987.39	6570.92	-0.39781	1.3426e-10	6.99899e-09	Niben261Chr14g1532011	Niben261Chr14	153246438	153249496	+	1683	protein_coding	- && sp|Q00775|SSG1_SOLTU Granule-bound starch synthase 1, chloroplastic/amyloplastic OS=Solanum tuberosum OX=4113 GN=WAXY PE=1 SV=1 && PF08323:Starch synthase catalytic domain|PF00534:Glycosyl transferases group 1	Glycos_transf_1
Niben261Chr01g0165017	5125.14	5164.68	4902.75	3774.06	3513.53	4042.1	5064.19	3776.56	0.423196	1.36166e-10	7.08902e-09	Niben261Chr01g0165017	Niben261Chr01	16471203	16478262	-	3042	protein_coding	- && sp|P57997|IF2C_PHAVU Translation initiation factor IF-2, chloroplastic OS=Phaseolus vulgaris OX=3885 GN=IF2CP PE=2 SV=1 && PF00009:Elongation factor Tu GTP binding domain|PF11987:Translation-initiation factor 2	GTP_EFTU
Niben261Chr01g1754010	27.3315	35.4808	20.6475	83.2014	97.4628	113.93	27.82	98.1979	-1.82502	1.38187e-10	7.18481e-09	Niben261Chr01g1754010	Niben261Chr01	175440206	175444836	+	2526	protein_coding	- && sp|Q9M331|PTR45_ARATH Protein NRT1/ PTR FAMILY 5.7 OS=Arabidopsis thaliana OX=3702 GN=NPF5.7 PE=2 SV=2 && PF00854:POT family	-
Niben261Chr07g1487005	4855.59	4988.38	4938.89	3689.89	3213.35	3863.07	4927.62	3588.77	0.457286	1.4084e-10	7.31317e-09	Niben261Chr07g1487005	Niben261Chr07	148702092	148705769	-	1011	protein_coding	- && sp|P24929|RK12_TOBAC 50S ribosomal protein L12, chloroplastic OS=Nicotiana tabacum OX=4097 GN=RPL12 PE=1 SV=1 && PF02519:Auxin responsive protein|PF00542:Ribosomal protein L7/L12 C-terminal domain|PF16320:Ribosomal protein L7/L12 dimerisation domain	Auxin_inducible
Niben261Scf03069g0000003	417.513	401.377	328.296	772.999	704.656	556.244	382.395	677.966	-0.825551	1.4151e-10	7.33832e-09	Niben261Scf03069g0000003	Niben261Scf03069	759	2423	-	645	protein_coding	- && sp|Q53NK6|MYBA1_ORYSJ Myb-related protein MYBAS1 OS=Oryza sativa subsp. japonica OX=39947 GN=MYBAS1 PE=2 SV=1 && PF00249:Myb-like DNA-binding domain	Myb_DNA-binding
novel.4800	1058.39	1197.48	1269.82	1992.96	1536.01	1995.2	1175.23	1841.39	-0.648495	1.42011e-10	7.3547e-09	-	Niben261Chr13	47245843	47247489	-	605	-	- && Q43513.1 RecName: Full=Metallothionein-like protein type 2 && PF01439:Metallothionein	-
novel.922	68.8001	79.8319	78.4606	0	0	0.957391	75.6975	0.31913	7.77106	1.43286e-10	7.41104e-09	-	Niben261Chr03	130958601	130960503	+	1857	-	- && - && -	-
Niben261Chr03g0194007	207.343	189.601	199.249	371.504	370.359	326.47	198.731	356.111	-0.84006	1.47467e-10	7.61731e-09	Niben261Chr03g0194007	Niben261Chr03	19393063	19398712	-	1167	protein_coding	- && sp|Q9SII6|PIX13_ARATH Probable serine/threonine-protein kinase PIX13 OS=Arabidopsis thaliana OX=3702 GN=PIX13 PE=1 SV=2 && PF00069:Protein kinase domain	Pkinase
Niben261Chr10g0363002	187.551	199.58	164.148	327.001	366.46	321.683	183.759	338.381	-0.881484	1.48861e-10	7.67934e-09	Niben261Chr10g0363002	Niben261Chr10	36376291	36379184	+	2580	protein_coding	- && sp|F4HXQ7|MYOB1_ARATH Myosin-binding protein 1 OS=Arabidopsis thaliana OX=3702 GN=MYOB1 PE=1 SV=1 && PF04576:Zein-binding	-
Niben261Chr12g0581002	1652.14	1743	1736.46	1232.54	1149.09	1295.35	1710.53	1225.66	0.480469	1.50509e-10	7.75425e-09	Niben261Chr12g0581002	Niben261Chr12	58031383	58035954	-	738	protein_coding	- && sp|Q9ASV6|RR20_ARATH 30S ribosomal protein S20, chloroplastic OS=Arabidopsis thaliana OX=3702 GN=RPS20 PE=2 SV=1 && PF01649:Ribosomal protein S20	-
Niben261Chr03g0081010	959.431	1091.04	1074.7	702.375	721.224	705.597	1041.72	709.732	0.552689	1.60604e-10	8.26357e-09	Niben261Chr03g0081010	Niben261Chr03	8160574	8165842	-	3246	protein_coding	- && - && PF10358:N-terminal C2 in EEIG1 and EHBP1 proteins	-
Niben261Chr19g0475001	33.9288	33.2633	42.3274	121.9	109.158	100.526	36.5065	110.528	-1.59811	1.62651e-10	8.35805e-09	Niben261Chr19g0475001	Niben261Chr19	47521542	47537936	-	1458	protein_coding	- && sp|Q9M439|BCAT2_ARATH Branched-chain-amino-acid aminotransferase 2, chloroplastic OS=Arabidopsis thaliana OX=3702 GN=BCAT2 PE=1 SV=1 && PF01063:Amino-transferase class IV	-
Niben261Chr19g0754004	1862.31	2105.57	2094.69	3475.11	2715.31	2832.92	2020.86	3007.78	-0.57415	1.6367e-10	8.39956e-09	Niben261Chr19g0754004	Niben261Chr19	75431001	75432169	+	954	protein_coding	- && sp|Q9ZWQ9|FLS_CITUN Flavonol synthase/flavanone 3-hydroxylase OS=Citrus unshiu OX=55188 GN=FLS PE=1 SV=1 && PF14226:non-haem dioxygenase in morphine synthesis N-terminal|PF03171:2OG-Fe(II) oxygenase superfamily	2OG-FeII_Oxy
Niben261Chr19g0746003	120.636	99.7899	102.205	37.7309	37.0359	31.5939	107.544	35.4535	1.6033	1.64682e-10	8.43021e-09	Niben261Chr19g0746003	Niben261Chr19	74605945	74606965	+	678	protein_coding	- && sp|Q69V10|BH062_ORYSJ Transcription factor BHLH062 OS=Oryza sativa subsp. japonica OX=39947 GN=BHLH062 PE=1 SV=1 && -	-
Niben261Chr01g0304001	108.384	86.4845	116.659	213.808	236.835	214.456	103.842	221.699	-1.09093	1.64693e-10	8.43021e-09	Niben261Chr01g0304001	Niben261Chr01	30433958	30436982	+	849	protein_coding	- && sp|Q9LDA7|P2C39_ARATH Probable protein phosphatase 2C 39 OS=Arabidopsis thaliana OX=3702 GN=At3g15260 PE=2 SV=1 && PF00481:Protein phosphatase 2C	PP2C
Niben261Chr07g1317001	5011.1	5355.39	5093.74	4134.92	3731.85	3819.99	5153.41	3895.59	0.403503	1.6903e-10	8.64102e-09	Niben261Chr07g1317001	Niben261Chr07	131713732	131717314	-	894	protein_coding	- && sp|Q9ST69|RR5_SPIOL 30S ribosomal protein S5, chloroplastic OS=Spinacia oleracea OX=3562 GN=rps5 PE=1 SV=1 && PF00333:Ribosomal protein S5, N-terminal domain|PF03719:Ribosomal protein S5, C-terminal domain	-
Niben261Chr16g0764012	561.71	588.76	534.771	866.843	863.52	795.592	561.747	841.985	-0.584282	1.70978e-10	8.72933e-09	Niben261Chr16g0764012	Niben261Chr16	76371116	76372258	+	1143	protein_coding	- && sp|Q3MKY2|AAE_RAUSE Acetylajmalan esterase OS=Rauvolfia serpentina OX=4060 GN=AAE PE=1 SV=1 && PF00657:GDSL-like Lipase/Acylhydrolase	Lipase_GDSL
Niben261Chr12g1281009	92.3618	88.7021	48.5217	253.474	245.606	150.31	76.5285	216.464	-1.49878	1.74494e-10	8.89741e-09	Niben261Chr12g1281009	Niben261Chr12	128057603	128062807	+	2307	protein_coding	- && - && PF00266:Aminotransferase class-V	Aminotran_5
Niben261Chr15g1034019	803.924	783.905	717.501	511.785	476.593	522.735	768.443	503.705	0.609525	1.74842e-10	8.90367e-09	Niben261Chr15g1034019	Niben261Chr15	103201953	103207872	+	1404	protein_coding	- && sp|C0M0V4|AAH1_SOYBN Allantoate deiminase 1 OS=Glycine max OX=3847 GN=AAH1 PE=1 SV=1 && PF01546:Peptidase family M20/M25/M40	Peptidase_M20
Niben261Chr08g0613003	2780.28	2773.05	2609.85	1930.08	1885.9	2144.56	2721.06	1986.85	0.453637	1.79946e-10	9.15182e-09	Niben261Chr08g0613003	Niben261Chr08	61328446	61359909	+	1947	protein_coding	- && sp|Q8L7S8|RH3_ARATH DEAD-box ATP-dependent RNA helicase 3, chloroplastic OS=Arabidopsis thaliana OX=3702 GN=RH3 PE=1 SV=2 && PF00271:Helicase conserved C-terminal domain|PF08152:GUCT (NUC152) domain|PF00270:DEAD/DEAH box helicase	DEAD
Niben261Chr17g0018026	8468.07	7657.21	7904.9	5983.73	5315.62	6291.02	8010.06	5863.46	0.450173	1.84814e-10	9.38738e-09	Niben261Chr17g0018026	Niben261Chr17	1823170	1826935	-	1206	protein_coding	- && sp|Q56YA5|SGAT_ARATH Serine--glyoxylate aminotransferase OS=Arabidopsis thaliana OX=3702 GN=AGT1 PE=1 SV=2 && PF00266:Aminotransferase class-V	Aminotran_5
Niben261Chr02g0493015	72.57	79.8319	76.3958	11.6095	10.7209	26.8069	76.2659	16.3791	2.21603	1.85246e-10	9.39726e-09	Niben261Chr02g0493015	Niben261Chr02	49269807	49270903	+	594	protein_coding	- && sp|Q9LUH2|DTX19_ARATH Protein DETOXIFICATION 19 OS=Arabidopsis thaliana OX=3702 GN=DTX19 PE=2 SV=1 && PF01554:MatE	MatE
Niben261Chr12g0953002	172.471	129.727	162.083	342.48	313.83	267.112	154.76	307.807	-0.988185	1.91124e-10	9.68303e-09	Niben261Chr12g0953002	Niben261Chr12	95319204	95321367	+	672	protein_coding	- && sp|Q8GYX2|FLZ14_ARATH FCS-Like Zinc finger 14 OS=Arabidopsis thaliana OX=3702 GN=FLZ14 PE=1 SV=1 && PF04570:zinc-finger of the FCS-type, C2-C2	-
Niben261Chr04g1794002	1283.64	1310.57	1290.47	966.491	847.926	915.266	1294.89	909.894	0.508861	1.93699e-10	9.80095e-09	Niben261Chr04g1794002	Niben261Chr04	179343928	179349715	+	2469	protein_coding	- && sp|Q9M1L7|PRK3_ARATH Pollen receptor-like kinase 3 OS=Arabidopsis thaliana OX=3702 GN=PRK3 PE=1 SV=1 && PF00504:Chlorophyll A-B binding protein|PF00069:Protein kinase domain	Pkinase
Niben261Chr08g0146003	11.3096	5.54388	6.19426	41.6007	63.3508	60.3156	7.68258	55.089	-2.82214	1.99866e-10	1.01001e-08	Niben261Chr08g0146003	Niben261Chr08	14582420	14594427	-	1665	protein_coding	- && - && PF06813:Nodulin-like	-
Niben261Chr09g1279010	183.781	151.902	113.561	320.229	305.058	293.919	149.748	306.402	-1.02979	2.07745e-10	1.04849e-08	Niben261Chr09g1279010	Niben261Chr09	127900008	127901420	-	1413	protein_coding	- && sp|Q9AT54|SCGT_TOBAC Scopoletin glucosyltransferase OS=Nicotiana tabacum OX=4097 GN=TOGT1 PE=1 SV=1 && PF00201:UDP-glucoronosyl and UDP-glucosyl transferase	UDPGT
Niben261Chr04g0042005	156.45	155.229	153.824	313.457	295.312	267.112	155.167	291.96	-0.91169	2.08184e-10	1.04937e-08	Niben261Chr04g0042005	Niben261Chr04	4262900	4265769	+	1437	protein_coding	- && sp|B5WWZ9|FAO2_LOTJA Long-chain-alcohol oxidase FAO2 OS=Lotus japonicus OX=34305 GN=FAO2 PE=2 SV=1 && PF00732:GMC oxidoreductase	-
Niben261Chr03g1266005	943.409	1014.53	957.013	1347.67	1322.57	1430.34	971.651	1366.86	-0.493069	2.1626e-10	1.08869e-08	Niben261Chr03g1266005	Niben261Chr03	126636908	126642960	-	1539	protein_coding	- && sp|M4IRL6|CCL7_HUMLU Probable CoA ligase CCL7 OS=Humulus lupulus OX=3486 GN=CCL7 PE=2 SV=1 && PF00501:AMP-binding enzyme|PF13193:AMP-binding enzyme C-terminal domain	AMP-binding
Niben261Chr06g0532015	115.923	137.488	104.27	254.442	269.972	217.328	119.227	247.247	-1.05455	2.29641e-10	1.15459e-08	Niben261Chr06g0532015	Niben261Chr06	53192181	53196946	-	837	protein_coding	- && sp|Q94JX5|WLIM1_ARATH LIM domain-containing protein WLIM1 OS=Arabidopsis thaliana OX=3702 GN=WLIM1 PE=1 SV=1 && PF00412:LIM domain	LIM
Niben261Chr15g0486001	27.3315	19.958	24.777	80.299	92.5896	86.1652	24.0222	86.3513	-1.83922	2.39024e-10	1.20024e-08	Niben261Chr15g0486001	Niben261Chr15	48589616	48593094	-	2067	protein_coding	- && sp|P14133|ASO_CUCSA L-ascorbate oxidase OS=Cucumis sativus OX=3659 PE=1 SV=1 && PF07732:Multicopper oxidase|PF07731:Multicopper oxidase|PF00394:Multicopper oxidase	-
Niben261Chr12g0822005	2099.82	2004.67	1990.42	2768.87	2661.71	2646.23	2031.63	2692.27	-0.405859	2.40893e-10	1.20809e-08	Niben261Chr12g0822005	Niben261Chr12	82207919	82214246	+	1206	protein_coding	- && sp|Q84P54|GATP1_SOLLC Gamma aminobutyrate transaminase 1, mitochondrial OS=Solanum lycopersicum OX=4081 GN=GABA-TP1 PE=1 SV=1 && PF00202:Aminotransferase class-III	Aminotran_3
novel.413	49.9507	37.6984	26.8418	130.607	140.346	95.7391	38.1636	122.231	-1.67281	2.43378e-10	1.21901e-08	-	Niben261Chr01	160675131	160687201	-	997	-	- && Q9FYA2.1 RecName: Full=Probable WRKY transcription factor 75; AltName: Full=WRKY DNA-binding protein 75 && PF03106:WRKY DNA -binding domain	WRKY
Niben261Chr01g1769004	1045.2	1125.41	1078.83	715.919	614.015	793.677	1083.15	707.871	0.613042	2.44378e-10	1.22248e-08	Niben261Chr01g1769004	Niben261Chr01	176937353	176938478	+	579	protein_coding	- && sp|Q8H7U1|TBB2_ORYSJ Tubulin beta-2 chain OS=Oryza sativa subsp. japonica OX=39947 GN=TUBB2 PE=2 SV=1 && PF00091:Tubulin/FtsZ family, GTPase domain	Tubulin
Niben261Chr06g1167004	302.532	320.436	227.123	539.842	500.959	467.207	283.364	502.669	-0.827355	2.46481e-10	1.23144e-08	Niben261Chr06g1167004	Niben261Chr06	116780632	116783378	-	1239	protein_coding	- && sp|O81816|MO2_ARATH Monooxygenase 2 OS=Arabidopsis thaliana OX=3702 GN=MO2 PE=2 SV=1 && PF01494:FAD binding domain	FAD_binding_3
Niben261Chr04g0462003	360.965	332.633	324.166	528.232	555.538	541.883	339.255	541.884	-0.674414	2.52356e-10	1.25921e-08	Niben261Chr04g0462003	Niben261Chr04	46186964	46210271	+	1518	protein_coding	- && sp|Q8W4D4|BAGP1_ARATH BAG-associated GRAM protein 1 OS=Arabidopsis thaliana OX=3702 GN=BAGP1 PE=1 SV=1 && PF00168:C2 domain|PF16016:VAD1 Analog of StAR-related lipid transfer domain	C2
Niben261Chr15g1072002	76.3398	62.0915	57.8131	165.435	191.027	136.907	65.4148	164.456	-1.32586	2.69764e-10	1.34438e-08	Niben261Chr15g1072002	Niben261Chr15	107230343	107231714	+	558	protein_coding	- && sp|Q38853|STR15_ARATH Rhodanese-like domain-containing protein 15, chloroplastic OS=Arabidopsis thaliana OX=3702 GN=STR15 PE=2 SV=1 && PF00581:Rhodanese-like domain	Rhodanese
Niben261Chr19g0991001	1026.35	891.456	945.657	1469.57	1500.93	1263.76	954.486	1411.42	-0.563252	2.74992e-10	1.36871e-08	Niben261Chr19g0991001	Niben261Chr19	99059423	99062948	+	2136	protein_coding	- && sp|Q9M9S4|Y1143_ARATH Probable LRR receptor-like serine/threonine-protein kinase At1g14390 OS=Arabidopsis thaliana OX=3702 GN=At1g14390 PE=1 SV=1 && PF13855:Leucine rich repeat|PF00069:Protein kinase domain	Pkinase
Niben261Chr16g1104004	1911.32	2145.48	2016.23	1543.1	1412.24	1431.3	2024.35	1462.21	0.468717	2.76401e-10	1.374e-08	Niben261Chr16g1104004	Niben261Chr16	110341487	110343791	-	543	protein_coding	- && - && PF10674:Protein of unknown function (DUF2488)	-
Niben261Chr12g0661002	17130.3	16218.1	16621.3	12596.3	11026	13321.1	16656.5	12314.5	0.435754	2.76978e-10	1.37514e-08	Niben261Chr12g0661002	Niben261Chr12	66123940	66127298	-	1125	protein_coding	- && sp|P05414|GOX_SPIOL Peroxisomal (S)-2-hydroxy-acid oxidase OS=Spinacia oleracea OX=3562 PE=1 SV=1 && PF01070:FMN-dependent dehydrogenase	FMN_dh
Niben261Chr01g1101003	1806.71	1939.25	1748.85	1304.13	1267.02	1389.17	1831.6	1320.11	0.472	2.77406e-10	1.37554e-08	Niben261Chr01g1101003	Niben261Chr01	110096558	110103355	-	2457	protein_coding	- && sp|A7XN92|CFM3_MAIZE CRM-domain containing factor CFM3, chloroplastic/mitochondrial OS=Zea mays OX=4577 GN=CFM3 PE=1 SV=1 && PF01985:CRS1 / YhbY (CRM) domain	-
Niben261Chr19g1451014	287.452	251.692	249.835	428.584	438.582	459.548	262.993	442.238	-0.747894	2.82105e-10	1.39709e-08	Niben261Chr19g1451014	Niben261Chr19	145127998	145138335	-	3174	protein_coding	- && sp|Q9C6K9|LRL11_ARATH LEAF RUST 10 DISEASE-RESISTANCE LOCUS RECEPTOR-LIKE PROTEIN KINASE-like 1.1 OS=Arabidopsis thaliana OX=3702 GN=LRK10L-1.1 PE=2 SV=1 && PF00069:Protein kinase domain	Pkinase
Niben261Chr18g0858015	239.387	171.86	128.015	445.031	380.105	342.746	179.754	389.294	-1.11103	2.8385e-10	1.40398e-08	Niben261Chr18g0858015	Niben261Chr18	85792950	85795974	-	1257	protein_coding	- && sp|P43644|DNJH_ATRNU DnaJ protein homolog ANJ1 OS=Atriplex nummularia OX=3553 PE=2 SV=1 && PF01556:DnaJ C terminal domain|PF00226:DnaJ domain|PF00684:DnaJ central domain	DnaJ_C
Niben261Chr01g0731001	20674.9	19648.6	19147.5	16189.4	14209.1	14909.5	19823.7	15102.7	0.392457	2.91221e-10	1.43864e-08	Niben261Chr01g0731001	Niben261Chr01	72992621	72994282	-	1002	protein_coding	- && sp|Q40459|PSBO_TOBAC Oxygen-evolving enhancer protein 1, chloroplastic OS=Nicotiana tabacum OX=4097 GN=PSBO PE=2 SV=1 && PF01716:Manganese-stabilising protein / photosystem II polypeptide	-
Niben261Chr04g1371003	1310.03	1299.49	1268.79	944.239	945.389	882.715	1292.77	924.114	0.484468	2.95164e-10	1.4563e-08	Niben261Chr04g1371003	Niben261Chr04	137152241	137165611	-	1335	protein_coding	- && sp|Q9M158|STR4_ARATH Rhodanese-like domain-containing protein 4, chloroplastic OS=Arabidopsis thaliana OX=3702 GN=STR4 PE=1 SV=2 && -	-
Niben261Chr06g0725007	742.664	679.68	707.178	1048.72	1060.39	979.411	709.84	1029.51	-0.535405	2.96369e-10	1.46043e-08	Niben261Chr06g0725007	Niben261Chr06	72550916	72553526	+	1092	protein_coding	- && sp|Q9FQY8|COMT1_CAPAN Caffeic acid 3-O-methyltransferase OS=Capsicum annuum OX=4072 GN=COMT PE=2 SV=2 && PF00891:O-methyltransferase domain|PF08100:Dimerisation domain	-
Niben261Chr01g0118005	2072.48	2159.9	1959.45	1492.79	1449.27	1578.74	2063.94	1506.93	0.453526	2.98829e-10	1.47072e-08	Niben261Chr01g0118005	Niben261Chr01	11867348	11872245	+	1032	protein_coding	- && sp|O82279|CG160_ARATH Protein CONSERVED ONLY IN THE GREEN LINEAGE 160, chloroplastic OS=Arabidopsis thaliana OX=3702 GN=CGL160 PE=1 SV=1 && -	-
Niben261Chr06g1439001	1361.86	1311.68	1242.98	1925.24	1891.75	1686.92	1305.51	1834.64	-0.490527	2.99862e-10	1.47397e-08	Niben261Chr06g1439001	Niben261Chr06	143886433	143890029	-	1311	protein_coding	- && sp|Q8GSM7|HST_TOBAC Shikimate O-hydroxycinnamoyltransferase OS=Nicotiana tabacum OX=4097 GN=HST PE=1 SV=1 && PF02458:Transferase family	-
novel.6829	703.08	618.697	664.85	921.988	1064.29	982.283	662.209	989.521	-0.578187	3.00677e-10	1.47615e-08	-	Niben261Chr19	132728377	132730943	+	1181	-	- && Q9ZQG8.1 RecName: Full=Ferredoxin-3, chloroplastic; Short=AtFd3; Flags: Precursor && PF00111:2Fe-2S iron-sulfur cluster binding domain	Fer2
Niben261Chr17g0500001	2908.45	3295.28	2952.6	1937.82	1772.85	2376.24	3052.11	2028.97	0.588701	3.03221e-10	1.48542e-08	Niben261Chr17g0500001	Niben261Chr17	50051309	50052992	-	1332	protein_coding	- && sp|O04496|AED3_ARATH Aspartyl protease AED3 OS=Arabidopsis thaliana OX=3702 GN=AED3 PE=1 SV=1 && PF14541:Xylanase inhibitor C-terminal|PF14543:Xylanase inhibitor N-terminal	-
novel.4271	0	0	0	37.7309	41.909	45.9548	0	41.8649	-7.79396	3.03316e-10	1.48542e-08	-	Niben261Chr12	62335832	62336730	+	899	-	- && - && -	-
Niben261Chr09g1193021	999.015	1061.1	1015.86	719.789	728.047	599.327	1025.32	682.388	0.587218	3.04784e-10	1.49077e-08	Niben261Chr09g1193021	Niben261Chr09	119242192	119245471	+	834	protein_coding	- && sp|Q8L7W5|SMO11_ARATH Methylsterol monooxygenase 1-1 OS=Arabidopsis thaliana OX=3702 GN=SMO1-1 PE=1 SV=1 && PF04116:Fatty acid hydroxylase superfamily	-
Niben261Chr02g0736004	2387.27	2226.42	2680.05	3418.03	3503.79	3216.83	2431.25	3379.55	-0.474884	3.15726e-10	1.54239e-08	Niben261Chr02g0736004	Niben261Chr02	73593308	73596233	+	561	protein_coding	- && sp|P51823|ARF2_ORYSJ ADP-ribosylation factor 2 OS=Oryza sativa subsp. japonica OX=39947 GN=ARF PE=2 SV=2 && PF00025:ADP-ribosylation factor family	Arf
Niben261Chr01g0565003	480.658	403.595	338.619	223.483	224.164	217.328	407.624	221.658	0.880467	3.16131e-10	1.54246e-08	Niben261Chr01g0565003	Niben261Chr01	56527691	56528938	-	363	protein_coding	- && sp|Q8LD26|DRMH3_ARATH Dormancy-associated protein homolog 3 OS=Arabidopsis thaliana OX=3702 GN=At1g56220 PE=1 SV=1 && PF05564:Dormancy/auxin associated protein	-
Niben261Chr16g1171011	1823.67	1931.49	2248.52	1367.02	1357.66	1440.87	2001.23	1388.52	0.527042	3.19951e-10	1.55918e-08	Niben261Chr16g1171011	Niben261Chr16	116965240	117007674	+	1296	protein_coding	- && sp|P48626|FAD3E_TOBAC Omega-3 fatty acid desaturase, endoplasmic reticulum OS=Nicotiana tabacum OX=4097 GN=FAD3 PE=2 SV=1 && PF11960:Domain of unknown function (DUF3474)|PF00487:Fatty acid desaturase	-
Niben261Chr07g0195004	1030.12	1110.99	1057.15	758.487	738.768	742.935	1066.09	746.73	0.513056	3.23563e-10	1.57485e-08	Niben261Chr07g0195004	Niben261Chr07	19557326	19569275	+	2397	protein_coding	- && sp|F4HT41|SAMC2_ARATH Probable S-adenosylmethionine carrier 2, chloroplastic OS=Arabidopsis thaliana OX=3702 GN=SAMC2 PE=2 SV=1 && PF00153:Mitochondrial carrier protein	Mito_carr
Niben261Chr17g1369010	919.848	972.397	952.883	681.091	655.924	582.094	948.376	639.703	0.567775	3.27949e-10	1.59423e-08	Niben261Chr17g1369010	Niben261Chr17	136981833	136983284	-	630	protein_coding	- && sp|Q0JG75|PSB28_ORYSJ Photosystem II reaction center PSB28 protein, chloroplastic OS=Oryza sativa subsp. japonica OX=39947 GN=PSB28 PE=2 SV=2 && PF03912:Psb28 protein	-
Niben261Chr10g1175005	44.2959	35.4808	28.9065	114.16	98.4374	117.759	36.2278	110.119	-1.59884	3.35535e-10	1.6274e-08	Niben261Chr10g1175005	Niben261Chr10	117498360	117499895	+	1233	protein_coding	- && sp|P49598|P2C37_ARATH Protein phosphatase 2C 37 OS=Arabidopsis thaliana OX=3702 GN=PP2CA PE=1 SV=1 && PF00481:Protein phosphatase 2C	PP2C
Niben261Chr08g0308022	1703.98	1827.26	1954.29	1370.89	1268.97	1283.86	1828.51	1307.91	0.483022	3.35944e-10	1.6274e-08	Niben261Chr08g0308022	Niben261Chr08	30774411	30776490	-	897	protein_coding	- && sp|O80377|RSSA_DAUCA 40S ribosomal protein SA OS=Daucus carota OX=4039 GN=179B PE=2 SV=1 && PF00318:Ribosomal protein S2	-
Niben261Chr11g0575011	177.184	150.794	175.504	345.383	377.181	267.112	167.827	329.892	-0.972823	3.36004e-10	1.6274e-08	Niben261Chr11g0575011	Niben261Chr11	57546640	57547772	+	426	protein_coding	- && - && -	-
Niben261Chr12g1102024	1862.31	2007.99	1777.75	1405.72	1237.78	1370.03	1882.69	1337.84	0.492472	3.46433e-10	1.6755e-08	Niben261Chr12g1102024	Niben261Chr12	110177965	110191387	-	1260	protein_coding	- && sp|Q93ZB6|DCUP1_ARATH Uroporphyrinogen decarboxylase 1, chloroplastic OS=Arabidopsis thaliana OX=3702 GN=HEME1 PE=2 SV=2 && PF01208:Uroporphyrinogen decarboxylase (URO-D)	-
Niben261Chr11g1116011	1170.54	1186.39	1106.71	827.177	752.413	835.802	1154.55	805.131	0.519862	3.46781e-10	1.6755e-08	Niben261Chr11g1116011	Niben261Chr11	111599159	111603985	-	1017	protein_coding	- && sp|P46276|F16P2_SOLTU Fructose-1,6-bisphosphatase, cytosolic OS=Solanum tuberosum OX=4113 PE=2 SV=1 && PF00316:Fructose-1-6-bisphosphatase, N-terminal domain	-
Niben261Chr12g0064017	0	0	0	43.5356	31.1881	50.7417	0	41.8218	-7.79275	3.51452e-10	1.69545e-08	Niben261Chr12g0064017	Niben261Chr12	6414432	6417716	-	882	protein_coding	- && sp|Q940G0|TMN1_ARATH Transmembrane 9 superfamily member 1 OS=Arabidopsis thaliana OX=3702 GN=TMN1 PE=1 SV=1 && PF02990:Endomembrane protein 70	-
Niben261Chr15g1317002	114.981	121.965	149.695	281.53	258.276	236.476	128.88	258.761	-1.00658	3.51765e-10	1.69545e-08	Niben261Chr15g1317002	Niben261Chr15	131771883	131773535	-	564	protein_coding	- && sp|Q9SA16|P2A09_ARATH Protein PHLOEM PROTEIN 2-LIKE A9 OS=Arabidopsis thaliana OX=3702 GN=PP2A9 PE=2 SV=1 && PF14299:Phloem protein 2	-
Niben261Chr09g1112015	666.324	722.922	680.336	1062.27	1011.66	946.86	689.861	1006.93	-0.546346	3.5526e-10	1.71021e-08	Niben261Chr09g1112015	Niben261Chr09	111190197	111191535	-	411	protein_coding	- && sp|P56331|IF1A_ONOVI Eukaryotic translation initiation factor 1A OS=Onobrychis viciifolia OX=3882 PE=2 SV=2 && PF01176:Translation initiation factor 1A / IF-1	-
Niben261Chr16g0015001	4355.14	4513.83	4160.48	3415.13	3297.17	3303.96	4343.15	3338.75	0.379318	3.58441e-10	1.72343e-08	Niben261Chr16g0015001	Niben261Chr16	1500184	1502435	-	825	protein_coding	- && sp|O80360|RK3_TOBAC 50S ribosomal protein L3, chloroplastic (Fragment) OS=Nicotiana tabacum OX=4097 GN=RPL3 PE=2 SV=1 && PF00297:Ribosomal protein L3	-
novel.6438	167.759	170.752	121.82	66.7546	47.7568	62.2304	153.444	58.9139	1.38064	3.61131e-10	1.73426e-08	-	Niben261Chr18	62591982	62597297	+	1940	-	- && Q9ZU11.1 RecName: Full=Homeobox-leucine zipper protein ATHB-15; AltName: Full=HD-ZIP protein ATHB-15; AltName: Full=Homeodomain transcription factor ATHB-15; AltName: Full=Protein CORONA; AltName: Full=Protein INCURVATA 4 && -	-
Niben261Chr08g0643005	537.206	483.426	317.972	1211.26	1136.42	1147.91	446.201	1165.2	-1.38444	3.66737e-10	1.75905e-08	Niben261Chr08g0643005	Niben261Chr08	64301380	64303018	+	1509	protein_coding	- && sp|Q8VZG2|HSR4_ARATH Protein HYPER-SENSITIVITY-RELATED 4 OS=Arabidopsis thaliana OX=3702 GN=HSR4 PE=2 SV=1 && PF00004:ATPase family associated with various cellular activities (AAA)|PF14363:Domain associated at C-terminal with AAA	AAA
Niben261Chr03g0199018	321.381	392.507	345.846	197.362	200.773	195.308	353.245	197.814	0.834649	3.82156e-10	1.83079e-08	Niben261Chr03g0199018	Niben261Chr03	19823975	19826839	+	939	protein_coding	- && sp|P12859|G3PB_PEA Glyceraldehyde-3-phosphate dehydrogenase B, chloroplastic OS=Pisum sativum OX=3888 GN=GAPB PE=1 SV=2 && PF02800:Glyceraldehyde 3-phosphate dehydrogenase, C-terminal domain|PF00044:Glyceraldehyde 3-phosphate dehydrogenase, NAD binding domain	-
Niben261Chr04g0964004	31968.5	30664.3	30498.5	17011.8	14428.4	19851.5	31043.7	17097.2	0.860539	3.89635e-10	1.86437e-08	Niben261Chr04g0964004	Niben261Chr04	96386375	96394083	+	966	protein_coding	- && sp|P04783|CB25_PETSP Chlorophyll a-b binding protein 91R, chloroplastic OS=Petunia sp. OX=4104 GN=CAB91R PE=3 SV=1 && PF00504:Chlorophyll A-B binding protein	-
novel.4713	55.6055	65.4178	53.6836	160.598	174.458	118.716	58.2356	151.258	-1.37938	4.07751e-10	1.94869e-08	-	Niben261Chr13	128295232	128304449	+	1649	-	- && - && -	-
Niben261Chr09g0025009	929.272	883.695	933.268	1351.54	1329.39	1211.1	915.412	1297.34	-0.502567	4.08937e-10	1.95201e-08	Niben261Chr09g0025009	Niben261Chr09	2582242	2586009	-	1263	protein_coding	- && sp|Q8VWZ7|C76B6_CATRO Geraniol 8-hydroxylase OS=Catharanthus roseus OX=4058 GN=CYP76B6 PE=1 SV=1 && PF00067:Cytochrome P450	p450
Niben261Chr14g0825006	2654.93	2983.72	3153.91	1791.73	1788.44	2276.68	2930.85	1952.28	0.585811	4.13311e-10	1.97052e-08	Niben261Chr14g0825006	Niben261Chr14	82562770	82564837	-	912	protein_coding	- && sp|Q9S728|PDF1_ARATH Protodermal factor 1 OS=Arabidopsis thaliana OX=3702 GN=PDF1 PE=2 SV=1 && -	-
Niben261Chr07g1504003	38.6411	33.2633	44.3922	0	0	0	38.7655	0	7.7696	4.17961e-10	1.99029e-08	Niben261Chr07g1504003	Niben261Chr07	150399906	150400352	-	324	protein_coding	- && - && -	-
Niben261Chr13g0813007	53.7206	31.0457	26.8418	126.737	116.955	109.143	37.2027	117.612	-1.64907	4.30925e-10	2.04956e-08	Niben261Chr13g0813007	Niben261Chr13	81378734	81380096	-	1149	protein_coding	- && - && PF02485:Core-2/I-Branching enzyme	-
Niben261Chr12g0194004	589.984	622.023	595.681	842.656	984.374	874.098	602.563	900.376	-0.579858	4.32503e-10	2.0546e-08	Niben261Chr12g0194004	Niben261Chr12	19457243	19461459	-	1536	protein_coding	- && sp|Q9AXU4|TD_NICAT Threonine dehydratase OS=Nicotiana attenuata OX=49451 GN=TD PE=1 SV=1 && PF00585:C-terminal regulatory domain of Threonine dehydratase|PF00291:Pyridoxal-phosphate dependent enzyme	PALP
Niben261Chr19g0621005	608.834	557.714	509.994	847.494	894.708	805.166	558.847	849.123	-0.602422	4.387e-10	2.08154e-08	Niben261Chr19g0621005	Niben261Chr19	62119250	62122337	-	2673	protein_coding	- && sp|C0LGK4|Y2165_ARATH Probable LRR receptor-like serine/threonine-protein kinase At2g16250 OS=Arabidopsis thaliana OX=3702 GN=At2g16250 PE=1 SV=1 && PF07714:Protein tyrosine kinase|PF13855:Leucine rich repeat	Pkinase_Tyr
Niben261Chr08g0595002	2920.71	3117.88	2840.07	2157.43	2210.46	2298.7	2959.55	2222.19	0.413094	4.43038e-10	2.09961e-08	Niben261Chr08g0595002	Niben261Chr08	59511916	59522425	+	1098	protein_coding	- && sp|Q42967|DCUP_TOBAC Uroporphyrinogen decarboxylase, chloroplastic OS=Nicotiana tabacum OX=4097 GN=DCUP PE=1 SV=1 && PF01208:Uroporphyrinogen decarboxylase (URO-D)	-
Niben261Chr12g1315027	194.148	204.015	230.22	418.909	364.511	341.789	209.461	375.07	-0.841179	4.46067e-10	2.10994e-08	Niben261Chr12g1315027	Niben261Chr12	131519621	131523710	+	438	protein_coding	- && sp|O64527|Y1926_ARATH UPF0678 fatty acid-binding protein-like protein At1g79260 OS=Arabidopsis thaliana OX=3702 GN=At1g79260 PE=1 SV=1 && PF08768:Domain of unknown function (DUF1794)	-
Niben261Chr03g1583014	31.1014	36.5896	19.6151	98.6808	128.651	80.4208	29.1021	102.584	-1.82001	4.46283e-10	2.10994e-08	Niben261Chr03g1583014	Niben261Chr03	158368268	158370598	+	1095	protein_coding	- && sp|A2CIR5|NPR4_ORYSJ Ankyrin repeat-containing protein NPR4 OS=Oryza sativa subsp. japonica OX=39947 GN=NPR4 PE=2 SV=1 && PF13962:Domain of unknown function|PF12796:Ankyrin repeats (3 copies)	-
Niben261Chr10g0063008	79.1672	67.6353	17.5504	1.93492	4.87314	5.74435	54.7843	4.18413	3.71127	4.48964e-10	2.12008e-08	Niben261Chr10g0063008	Niben261Chr10	6269184	6279375	-	480	protein_coding	- && sp|Q6NMM1|GOT1_ARATH Vesicle transport protein GOT1 OS=Arabidopsis thaliana OX=3702 GN=GOT1 PE=1 SV=1 && PF04178:Got1/Sft2-like family	-
novel.2324	405.261	370.331	327.263	764.292	680.29	519.863	367.618	654.815	-0.831884	4.5564e-10	2.14704e-08	-	Niben261Chr06	80455176	80456719	-	920	-	- && O03982.1 RecName: Full=Heavy metal-associated isoprenylated plant protein 39; Short=AtHIP39; Flags: Precursor && PF00403:Heavy-metal-associated domain	HMA
Niben261Chr09g1039003	5237.29	5380.89	5258.92	4144.59	3640.23	4156.99	5292.37	3980.61	0.41082	4.55756e-10	2.14704e-08	Niben261Chr09g1039003	Niben261Chr09	103914841	103915701	-	861	protein_coding	- && sp|Q9S726|RPI3_ARATH Probable ribose-5-phosphate isomerase 3, chloroplastic OS=Arabidopsis thaliana OX=3702 GN=RPI3 PE=1 SV=1 && PF06026:Ribose 5-phosphate isomerase A (phosphoriboisomerase A)	Rib_5-P_isom_A
Niben261Chr10g0007010	10822.3	10283.9	10036.8	12699.8	13532.7	13786.4	10381	13339.7	-0.361693	4.59491e-10	2.16206e-08	Niben261Chr10g0007010	Niben261Chr10	709293	717267	+	4632	protein_coding	- && sp|Q9LZJ5|AB14C_ARATH ABC transporter C family member 14 OS=Arabidopsis thaliana OX=3702 GN=ABCC14 PE=1 SV=1 && PF00005:ABC transporter|PF00664:ABC transporter transmembrane region	ABC_membrane
Niben261Chr03g0033015	156.45	140.815	154.856	69.657	64.3254	53.6139	150.707	62.5321	1.27049	4.61631e-10	2.16956e-08	Niben261Chr03g0033015	Niben261Chr03	3273578	3298710	-	2784	protein_coding	- && sp|Q6L400|R1B16_SOLDE Putative late blight resistance protein homolog R1B-16 OS=Solanum demissum OX=50514 GN=R1B-16 PE=3 SV=1 && PF00931:NB-ARC domain	NB-ARC
Niben261Chr16g0008011	2488.11	2429.33	2587.13	3383.2	3400.48	3138.33	2501.53	3307.34	-0.40272	4.64397e-10	2.17997e-08	Niben261Chr16g0008011	Niben261Chr16	804445	808867	+	651	protein_coding	- && sp|Q9FPJ5|LRR1_ARATH Leucine-rich repeat protein 1 OS=Arabidopsis thaliana OX=3702 GN=LRR1 PE=1 SV=1 && PF08263:Leucine rich repeat N-terminal domain|PF13855:Leucine rich repeat	LRRNT_2
Niben261Chr19g0144001	650.302	647.525	644.203	921.02	916.15	956.434	647.343	931.201	-0.524548	4.67462e-10	2.19176e-08	Niben261Chr19g0144001	Niben261Chr19	14447288	14460748	+	1377	protein_coding	- && sp|Q9SKX5|PAO2_ARATH Polyamine oxidase 2 OS=Arabidopsis thaliana OX=3702 GN=PAO2 PE=1 SV=1 && PF01593:Flavin containing amine oxidoreductase	Amino_oxidase
Niben261Chr04g1679027	316.669	342.612	247.77	525.33	582.827	477.738	302.35	528.632	-0.806598	4.7586e-10	2.2285e-08	Niben261Chr04g1679027	Niben261Chr04	167928834	167931940	-	810	protein_coding	- && sp|Q9S7P9|SNP33_ARATH SNAP25 homologous protein SNAP33 OS=Arabidopsis thaliana OX=3702 GN=SNAP33 PE=1 SV=1 && -	-
Niben261Chr04g1043008	423.168	325.98	374.753	618.206	819.662	574.435	374.633	670.767	-0.838141	4.79457e-10	2.24269e-08	Niben261Chr04g1043008	Niben261Chr04	104302402	104305761	+	2109	protein_coding	- && sp|O23225|PUB5_ARATH U-box domain-containing protein 5 OS=Arabidopsis thaliana OX=3702 GN=PUB5 PE=3 SV=3 && PF04564:U-box domain	U-box
Niben261Chr07g1058001	200.745	145.25	158.986	337.643	326.5	297.749	168.327	320.631	-0.925005	4.91683e-10	2.29717e-08	Niben261Chr07g1058001	Niben261Chr07	105832537	105838621	-	1716	protein_coding	- && sp|Q7XJR9|CDPKG_ARATH Calcium-dependent protein kinase 16 OS=Arabidopsis thaliana OX=3702 GN=CPK16 PE=1 SV=1 && PF13499:EF-hand domain pair|PF00069:Protein kinase domain	Pkinase
Niben261Chr14g1506004	52.7781	24.3931	24.777	121.9	150.093	92.8669	33.9828	121.62	-1.82542	5.00033e-10	2.33343e-08	Niben261Chr14g1506004	Niben261Chr14	150561258	150564324	+	375	protein_coding	- && - && -	-
Niben261Chr06g0294004	131.945	149.685	77.4282	288.303	241.708	284.345	119.686	271.452	-1.18284	5.02265e-10	2.34109e-08	Niben261Chr06g0294004	Niben261Chr06	29477806	29480552	-	1545	protein_coding	- && sp|Q40577|5EAS_TOBAC 5-epi-aristolochene synthase OS=Nicotiana tabacum OX=4097 GN=EAS3 PE=1 SV=3 && PF01397:Terpene synthase, N-terminal domain|PF03936:Terpene synthase family, metal binding domain	-
Niben261Chr07g1072002	11370.9	10707.5	10575.7	8012.49	6965.66	8686.41	10884.7	7888.19	0.46456	5.12673e-10	2.38679e-08	Niben261Chr07g1072002	Niben261Chr07	107236686	107237836	-	753	protein_coding	- && sp|Q40677|ALFP_ORYSJ Fructose-bisphosphate aldolase, chloroplastic OS=Oryza sativa subsp. japonica OX=39947 GN=ALDP PE=1 SV=2 && PF00274:Fructose-bisphosphate aldolase class-I	-
Niben261Chr10g0656011	191.321	180.731	189.957	329.903	335.272	323.598	187.336	329.591	-0.814148	5.23497e-10	2.43432e-08	Niben261Chr10g0656011	Niben261Chr10	65633954	65638326	+	2724	protein_coding	- && sp|O80462|XLG1_ARATH Extra-large guanine nucleotide-binding protein 1 OS=Arabidopsis thaliana OX=3702 GN=XLG1 PE=1 SV=2 && PF00503:G-protein alpha subunit	G-alpha
Niben261Chr13g0654007	386.411	389.18	386.109	214.776	216.367	248.922	387.234	226.688	0.772192	5.24352e-10	2.43544e-08	Niben261Chr13g0654007	Niben261Chr13	65482990	65487515	-	2508	protein_coding	- && sp|Q9SE97|FH1_ARATH Formin-like protein 1 OS=Arabidopsis thaliana OX=3702 GN=FH1 PE=1 SV=1 && PF02181:Formin Homology 2 Domain	FH2
Niben261Chr19g1471002	321.381	294.934	294.227	509.851	665.671	455.718	303.514	543.746	-0.840089	5.35202e-10	2.48109e-08	Niben261Chr19g1471002	Niben261Chr19	147155572	147159649	+	1760	protein_coding	- && sp|F4I4K5|LPR1_ARATH Multicopper oxidase LPR1 OS=Arabidopsis thaliana OX=3702 GN=LPR1 PE=2 SV=1 && PF07731:Multicopper oxidase|PF00394:Multicopper oxidase	-
Niben261Chr04g1031007	646.532	734.01	658.656	963.589	972.678	1051.22	679.733	995.827	-0.552232	5.35432e-10	2.48109e-08	Niben261Chr04g1031007	Niben261Chr04	103071888	103076752	+	714	protein_coding	- && sp|O49997|1433E_TOBAC 14-3-3-like protein E OS=Nicotiana tabacum OX=4097 PE=1 SV=1 && PF00244:14-3-3 protein	-
Niben261Chr09g1311002	1127.19	940.242	1176.91	1554.71	1593.52	1561.5	1081.45	1569.91	-0.536614	5.46613e-10	2.52994e-08	Niben261Chr09g1311002	Niben261Chr09	131146272	131148236	+	507	protein_coding	- && sp|Q9SVL6|CRPM2_ARATH Cold-regulated 413 plasma membrane protein 2 OS=Arabidopsis thaliana OX=3702 GN=COR413PM2 PE=2 SV=1 && PF05562:Cold acclimation protein WCOR413	-
Niben261Chr14g1472008	406.203	323.763	254.997	615.304	691.011	528.48	328.321	611.598	-0.895248	5.50762e-10	2.54616e-08	Niben261Chr14g1472008	Niben261Chr14	147276075	147280536	+	1821	protein_coding	- && sp|Q38897|BEL1_ARATH Homeobox protein BEL1 homolog OS=Arabidopsis thaliana OX=3702 GN=BEL1 PE=1 SV=2 && PF07526:Associated with HOX	POX
Niben261Chr17g1295008	761.513	648.634	666.915	1033.25	1029.21	988.985	692.354	1017.15	-0.553309	5.57743e-10	2.57543e-08	Niben261Chr17g1295008	Niben261Chr17	129563606	129567205	+	786	protein_coding	- && sp|Q8VWI1|ERD2B_ARATH ER lumen protein-retaining receptor B OS=Arabidopsis thaliana OX=3702 GN=ERD2B PE=1 SV=1 && PF00810:ER lumen protein retaining receptor	ER_lumen_recept
Niben261Chr15g0795003	514.587	492.297	336.555	1111.61	1166.63	953.561	447.813	1077.27	-1.26617	5.86046e-10	2.70297e-08	Niben261Chr15g0795003	Niben261Chr15	79476679	79491964	+	1986	protein_coding	- && sp|O65717|CNGC1_ARATH Cyclic nucleotide-gated ion channel 1 OS=Arabidopsis thaliana OX=3702 GN=CNGC1 PE=1 SV=1 && PF00520:Ion transport protein|PF00027:Cyclic nucleotide-binding domain	Ion_trans
Niben261Chr03g1580007	942.467	932.481	872.358	1533.42	1624.7	1167.06	915.769	1441.73	-0.654544	5.99227e-10	2.76055e-08	Niben261Chr03g1580007	Niben261Chr03	158006118	158009027	-	2028	protein_coding	- && sp|Q9SSE8|GLYT1_ARATH Probable glycosyltransferase At3g07620 OS=Arabidopsis thaliana OX=3702 GN=At3g07620 PE=3 SV=1 && PF03016:Exostosin family	-
Niben261Chr05g0013011	836.911	734.01	753.635	1109.67	1163.71	1081.85	774.852	1118.41	-0.528128	6.03289e-10	2.77604e-08	Niben261Chr05g0013011	Niben261Chr05	1375497	1381099	-	3591	protein_coding	- && sp|Q9SX33|ALA9_ARATH Putative phospholipid-transporting ATPase 9 OS=Arabidopsis thaliana OX=3702 GN=ALA9 PE=3 SV=1 && PF13246:Cation transport ATPase (P-type)|PF16209:Phospholipid-translocating ATPase N-terminal|PF16212:Phospholipid-translocating P-type ATPase C-terminal	-
Niben261Chr04g0922010	56.548	73.1792	62.9749	0	0	0.957391	64.2341	0.31913	7.5333	6.2893e-10	2.89067e-08	Niben261Chr04g0922010	Niben261Chr04	92222870	92224297	-	738	protein_coding	- && sp|O67623|DNAJ1_AQUAE Chaperone protein DnaJ 1 OS=Aquifex aeolicus (strain VF5) OX=224324 GN=dnaJ1 PE=3 SV=1 && PF13370:4Fe-4S single cluster domain of Ferredoxin I|PF00226:DnaJ domain	DnaJ
Niben261Chr18g0044022	1863.26	1772.93	1781.88	2651.8	2586.66	2254.66	1806.02	2497.71	-0.467459	6.30562e-10	2.89481e-08	Niben261Chr18g0044022	Niben261Chr18	4429155	4431299	-	1155	protein_coding	- && sp|Q9FMK9|PPA29_ARATH Probable inactive purple acid phosphatase 29 OS=Arabidopsis thaliana OX=3702 GN=PAP29 PE=2 SV=1 && PF00149:Calcineurin-like phosphoesterase	Metallophos
Niben261Chr05g0745022	688.001	700.747	717.501	1038.08	1002.89	967.922	702.083	1002.97	-0.514745	6.376e-10	2.92373e-08	Niben261Chr05g0745022	Niben261Chr05	74552333	74555779	+	672	protein_coding	- && sp|Q9SSL1|CAR7_ARATH Protein C2-DOMAIN ABA-RELATED 7 OS=Arabidopsis thaliana OX=3702 GN=CAR7 PE=1 SV=1 && PF00168:C2 domain	C2
novel.296	41.4685	48.7861	49.5541	137.379	133.524	106.27	46.6029	125.724	-1.43462	6.40908e-10	2.93551e-08	-	Niben261Chr01	58906687	58907894	-	595	-	- && - && -	-
Niben261Chr03g1555004	50.8932	34.3721	24.777	94.8109	148.143	117.759	36.6808	120.238	-1.70448	6.63132e-10	3.03379e-08	Niben261Chr03g1555004	Niben261Chr03	155536187	155556783	-	1588	protein_coding	- && sp|Q94AA4|PFKA3_ARATH ATP-dependent 6-phosphofructokinase 3 OS=Arabidopsis thaliana OX=3702 GN=PFK3 PE=1 SV=1 && PF00365:Phosphofructokinase	PFK
Niben261Chr11g0496003	97.0741	84.267	93.9462	211.873	174.458	203.924	91.7624	196.752	-1.09825	6.82051e-10	3.11675e-08	Niben261Chr11g0496003	Niben261Chr11	49620152	49626895	+	2418	protein_coding	- && sp|Q9S7T8|SPZX_ARATH Serpin-ZX OS=Arabidopsis thaliana OX=3702 GN=At1g47710 PE=1 SV=1 && PF00079:Serpin (serine protease inhibitor)	Serpin
Niben261Chr06g1349008	541.918	437.967	327.263	787.511	752.413	768.785	435.716	769.57	-0.81886	7.20265e-10	3.28758e-08	Niben261Chr06g1349008	Niben261Chr06	134901884	134905609	+	1032	protein_coding	- && sp|A0A0M4FTF3|BCP_PETHY Blue copper protein OS=Petunia hybrida OX=4102 GN=BCP PE=2 SV=1 && PF02298:Plastocyanin-like domain	Cu_bind_like
Niben261Chr10g0443018	5491.75	5248.95	5791.63	4273.26	4272.77	4270.92	5510.78	4272.32	0.36735	7.22018e-10	3.29179e-08	Niben261Chr10g0443018	Niben261Chr10	44341767	44344167	-	855	protein_coding	- && sp|P93004|PIP27_ARATH Aquaporin PIP2-7 OS=Arabidopsis thaliana OX=3702 GN=PIP2-7 PE=1 SV=2 && PF00230:Major intrinsic protein	-
novel.2885	43.3535	55.4388	37.1655	3.86983	8.77165	0.957391	45.3193	4.53296	3.32478	7.28417e-10	3.31714e-08	-	Niben261Chr08	89111228	89122132	+	1339	-	- && - && -	-
novel.730	3735.94	3466.03	3502.85	2717.59	2498.95	2808.03	3568.28	2674.85	0.41598	7.35264e-10	3.34448e-08	-	Niben261Chr02	109728897	109731639	-	1728	-	- && Q6SYB9.1 RecName: Full=S-adenosylmethionine synthase 2; Short=AdoMet synthase 2; AltName: Full=Methionine adenosyltransferase 2; Short=MAT 2 && PF00438:S-adenosylmethionine synthetase, N-terminal domain|PF02772:S-adenosylmethionine synthetase, central domain|PF02773:S-adenosylmethionine synthetase, C-terminal domain	-
Niben261Chr10g1117004	423.168	406.921	393.335	636.588	686.138	584.966	407.808	635.897	-0.640245	7.37881e-10	3.35253e-08	Niben261Chr10g1117004	Niben261Chr10	111707981	111710696	-	861	protein_coding	- && sp|Q9LSS4|TET4_ARATH Tetraspanin-4 OS=Arabidopsis thaliana OX=3702 GN=TET4 PE=3 SV=1 && PF00335:Tetraspanin family	Tetraspannin
Niben261Chr08g0246005	1739.79	1546.74	1323.51	2305.45	2425.85	2106.26	1536.68	2279.19	-0.568085	7.49527e-10	3.40155e-08	Niben261Chr08g0246005	Niben261Chr08	24611394	24620846	-	3330	protein_coding	- && sp|Q9LV10|PTR53_ARATH Protein NRT1/ PTR FAMILY 2.11 OS=Arabidopsis thaliana OX=3702 GN=NPF2.11 PE=1 SV=1 && PF00854:POT family	-
Niben261Chr09g0630001	1502.29	1398.17	1449.46	1085.49	1061.37	961.221	1449.97	1036.03	0.485508	7.77448e-10	3.52422e-08	Niben261Chr09g0630001	Niben261Chr09	63047693	63050140	-	1032	protein_coding	- && sp|P82658|TL19_ARATH Thylakoid lumenal 19 kDa protein, chloroplastic OS=Arabidopsis thaliana OX=3702 GN=At3g63540 PE=1 SV=2 && PF01789:PsbP	-
Niben261Chr06g0702007	388.296	389.18	413.983	606.596	663.721	581.136	397.153	617.151	-0.635889	7.85832e-10	3.55816e-08	Niben261Chr06g0702007	Niben261Chr06	70230613	70233725	+	822	protein_coding	- && sp|Q9LFD5|BPA1_ARATH Binding partner of ACD11 1 OS=Arabidopsis thaliana OX=3702 GN=BPA1 PE=1 SV=1 && PF00076:RNA recognition motif. (a.k.a. RRM, RBD, or RNP domain)	RRM_1
Niben261Chr11g0952012	322.324	248.366	194.087	877.485	947.338	616.56	254.925	813.794	-1.67366	8.32488e-10	3.76511e-08	Niben261Chr11g0952012	Niben261Chr11	95226906	95229066	+	717	protein_coding	- && sp|Q93WU9|WRK51_ARATH Probable WRKY transcription factor 51 OS=Arabidopsis thaliana OX=3702 GN=WRKY51 PE=1 SV=1 && PF03106:WRKY DNA -binding domain	WRKY
Niben261Chr13g0643002	153.622	180.731	150.727	360.862	362.562	248.922	161.693	324.115	-1.00487	8.3674e-10	3.78002e-08	Niben261Chr13g0643002	Niben261Chr13	64345523	64349779	+	570	protein_coding	- && sp|Q8GYN5|RIN4_ARATH RPM1-interacting protein 4 OS=Arabidopsis thaliana OX=3702 GN=RIN4 PE=1 SV=1 && PF05627:Cleavage site for pathogenic type III effector avirulence factor Avr	-
Niben261Chr17g0334003	1692.67	1892.68	1865.5	1334.13	1131.54	1344.18	1816.95	1269.95	0.516155	8.51605e-10	3.84279e-08	Niben261Chr17g0334003	Niben261Chr17	33422955	33425683	+	600	protein_coding	- && sp|Q8VY91|RR6_ARATH 30S ribosomal protein S6 alpha, chloroplastic OS=Arabidopsis thaliana OX=3702 GN=RPS6 PE=2 SV=1 && PF01250:Ribosomal protein S6	-
Niben261Chr19g0102008	3457.91	3357.37	3562.73	2716.62	2573.02	2230.72	3459.34	2506.79	0.464791	8.57382e-10	3.86446e-08	Niben261Chr19g0102008	Niben261Chr19	10208457	10210163	-	645	protein_coding	- && sp|Q6QPJ6|PRXQ_POPJC Peroxiredoxin Q, chloroplastic OS=Populus jackii OX=640484 GN=PRXQ PE=1 SV=1 && PF00578:AhpC/TSA family	-
Niben261Chr05g0878009	485.37	435.749	384.044	1084.52	1289.43	826.228	435.054	1066.73	-1.29352	8.89621e-10	4.00522e-08	Niben261Chr05g0878009	Niben261Chr05	87803331	87807407	-	642	protein_coding	- && sp|Q9LY00|WRK70_ARATH Probable WRKY transcription factor 70 OS=Arabidopsis thaliana OX=3702 GN=WRKY70 PE=1 SV=1 && PF03106:WRKY DNA -binding domain	WRKY
Niben261Chr11g1395010	299.704	311.566	302.486	474.055	531.172	468.164	304.586	491.13	-0.689646	8.95558e-10	4.02737e-08	Niben261Chr11g1395010	Niben261Chr11	139524432	139528143	+	762	protein_coding	- && sp|H9BFQ2|TPRL3_ERYCB Tropinone reductase-like 3 OS=Erythroxylum coca OX=289672 PE=2 SV=1 && PF13561:Enoyl-(Acyl carrier protein) reductase	-
Niben261Chr09g0167004	5724.54	5171.33	4707.64	6846.7	7048.51	7227.34	5201.17	7040.85	-0.43668	9.12504e-10	4.09892e-08	Niben261Chr09g0167004	Niben261Chr09	16663228	16670851	+	4305	protein_coding	- && sp|Q76CU2|PDR1_TOBAC Pleiotropic drug resistance protein 1 OS=Nicotiana tabacum OX=4097 GN=PDR1 PE=2 SV=1 && PF08370:Plant PDR ABC transporter associated|PF14510:ABC-transporter N-terminal|PF01061:ABC-2 type transporter|PF00005:ABC transporter	ABC2_membrane
Niben261Chr16g0098003	684.231	690.768	647.3	460.51	435.659	449.016	674.099	448.395	0.588104	9.30064e-10	4.17307e-08	Niben261Chr16g0098003	Niben261Chr16	9824783	9827909	-	621	protein_coding	- && sp|Q8LFP9|ABA4_ARATH Protein ABA DEFICIENT 4, chloroplastic OS=Arabidopsis thaliana OX=3702 GN=ABA4 PE=2 SV=1 && PF14108:Domain of unknown function (DUF4281)	-
Niben261Chr11g1319004	3264.71	3597.98	3090.93	2296.75	2046.72	2582.08	3317.87	2308.52	0.522995	9.46156e-10	4.24047e-08	Niben261Chr11g1319004	Niben261Chr11	131928417	131932252	-	1437	protein_coding	- && sp|P31593|GSA_TOBAC Glutamate-1-semialdehyde 2,1-aminomutase, chloroplastic OS=Nicotiana tabacum OX=4097 GN=GSA PE=2 SV=1 && PF00202:Aminotransferase class-III	Aminotran_3
Niben261Chr15g0951006	1193.16	1156.45	1272.92	803.958	802.119	914.308	1207.51	840.128	0.523391	9.70603e-10	4.34512e-08	Niben261Chr15g0951006	Niben261Chr15	95113521	95116350	+	1176	protein_coding	- && - && PF04862:Protein of unknown function (DUF642)	-
Niben261Chr01g0059002	55.6055	39.9159	47.4893	139.314	155.94	102.441	47.6703	132.565	-1.46953	1.04315e-09	4.66462e-08	Niben261Chr01g0059002	Niben261Chr01	5983777	5984511	-	735	protein_coding	- && sp|Q6R567|RMA1_CAPAN E3 ubiquitin-protein ligase RMA1H1 OS=Capsicum annuum OX=4072 GN=RMA1H1 PE=1 SV=1 && PF00097:Zinc finger, C3HC4 type (RING finger)	zf-C3HC4
Niben261Chr01g0076002	63.1453	54.33	55.7483	124.802	184.205	135.95	57.7412	148.319	-1.35813	1.05176e-09	4.69782e-08	Niben261Chr01g0076002	Niben261Chr01	7681802	7684899	+	1425	protein_coding	- && sp|Q9M3B3|WSD4_ARATH Wax ester synthase/diacylglycerol acyltransferase 4 OS=Arabidopsis thaliana OX=3702 GN=WSD4 PE=2 SV=1 && PF06974:Protein of unknown function (DUF1298)|PF03007:Wax ester synthase-like Acyl-CoA acyltransferase domain	-
Niben261Chr16g0338007	246.926	219.538	182.731	339.578	508.756	406.891	216.398	418.408	-0.949686	1.05365e-09	4.70097e-08	Niben261Chr16g0338007	Niben261Chr16	33651939	33654854	-	1056	protein_coding	- && sp|P12437|PERX_SOLTU Suberization-associated anionic peroxidase OS=Solanum tuberosum OX=4113 PE=2 SV=2 && PF00141:Peroxidase	-
Niben261Chr08g0901002	1723.77	1745.21	1730.26	1364.12	1216.34	1157.49	1733.08	1245.98	0.476042	1.05587e-09	4.70281e-08	Niben261Chr08g0901002	Niben261Chr08	90186424	90188566	+	687	protein_coding	- && sp|O48529|STR9_ARATH Rhodanese-like domain-containing protein 9, chloroplastic OS=Arabidopsis thaliana OX=3702 GN=STR9 PE=2 SV=1 && PF00581:Rhodanese-like domain	Rhodanese
Niben261Chr14g0495002	711.563	741.771	696.854	491.469	497.06	435.613	716.729	474.714	0.594199	1.05644e-09	4.70281e-08	Niben261Chr14g0495002	Niben261Chr14	49480849	49489119	+	1707	protein_coding	- && sp|O48921|C97B2_SOYBN Cytochrome P450 97B2, chloroplastic OS=Glycine max OX=3847 GN=CYP97B2 PE=2 SV=1 && PF00067:Cytochrome P450	p450
Niben261Chr06g0497004	408.088	423.552	234.349	1141.6	1134.47	1000.47	355.33	1092.18	-1.62	1.06522e-09	4.73658e-08	Niben261Chr06g0497004	Niben261Chr06	49721170	49724833	+	1572	protein_coding	- && sp|A0A1D6F9Y9|C92C6_MAIZE Trimethyltridecatetraene synthase OS=Zea mays OX=4577 GN=CYP92C6 PE=1 SV=1 && PF00067:Cytochrome P450	p450
Niben261Chr16g0723004	1539.99	1695.32	1724.07	1048.72	915.175	1268.54	1653.13	1077.48	0.617038	1.09593e-09	4.86768e-08	Niben261Chr16g0723004	Niben261Chr16	72279999	72282876	+	2025	protein_coding	- && sp|O48928|C77A3_SOYBN Cytochrome P450 77A3 OS=Glycine max OX=3847 GN=CYP77A3 PE=2 SV=1 && PF00067:Cytochrome P450	p450
Niben261Chr08g0215010	19252.7	18757.2	18824.3	15450.3	14783.2	15515.5	18944.7	15249.6	0.313045	1.11188e-09	4.93298e-08	Niben261Chr08g0215010	Niben261Chr08	21493826	21497851	-	1185	protein_coding	- && sp|Q9FN48|CAS_ARATH Calcium sensing receptor, chloroplastic OS=Arabidopsis thaliana OX=3702 GN=CAS PE=1 SV=1 && -	-
Niben261Chr11g0642003	666.324	658.613	580.195	443.096	380.105	387.743	635.044	403.648	0.65392	1.11455e-09	4.93932e-08	Niben261Chr11g0642003	Niben261Chr11	64193580	64196388	-	429	protein_coding	- && sp|K4BVL1|SPA_SOLLC Protein SPA, chloroplastic OS=Solanum lycopersicum OX=4081 GN=SPA PE=2 SV=1 && -	-
Niben261Chr09g0326001	242.214	213.994	227.123	395.69	376.206	380.084	227.777	383.994	-0.751647	1.14986e-09	5.09008e-08	Niben261Chr09g0326001	Niben261Chr09	32593950	32598461	-	1446	protein_coding	- && sp|P93051|ERDL7_ARATH Sugar transporter ERD6-like 7 OS=Arabidopsis thaliana OX=3702 GN=At2g48020 PE=2 SV=2 && PF00083:Sugar (and other) transporter	Sugar_tr
Niben261Chr15g0612001	76.3398	46.5686	38.1979	158.663	146.194	136.907	53.7021	147.255	-1.44597	1.20501e-09	5.32829e-08	Niben261Chr15g0612001	Niben261Chr15	61247685	61248873	+	747	protein_coding	- && - && -	-
Niben261Chr01g0459008	46.1809	53.2213	47.4893	130.607	129.625	115.844	48.9638	125.359	-1.35884	1.22708e-09	5.41482e-08	Niben261Chr01g0459008	Niben261Chr01	45922922	45926727	+	2973	protein_coding	- && sp|Q9LK64|AB3C_ARATH ABC transporter C family member 3 OS=Arabidopsis thaliana OX=3702 GN=ABCC3 PE=1 SV=1 && PF00005:ABC transporter|PF00664:ABC transporter transmembrane region	ABC_tran
novel.1052	511.76	498.949	452.181	735.268	715.377	735.276	487.63	728.64	-0.579043	1.22732e-09	5.41482e-08	-	Niben261Chr03	40846150	40851231	-	3826	-	- && Q9FL59.1 RecName: Full=FT-interacting protein 1 && -	-
Niben261Chr12g0924006	7278.67	7374.47	6615.47	5290.06	4546.64	5571.06	7089.54	5135.92	0.465021	1.2483e-09	5.50125e-08	Niben261Chr12g0924006	Niben261Chr12	92388653	92394715	+	3117	protein_coding	- && sp|Q9SZD6|PETS_ARATH Polyprotein of EF-Ts, chloroplastic OS=Arabidopsis thaliana OX=3702 GN=PETs PE=1 SV=1 && PF00575:S1 RNA binding domain|PF00889:Elongation factor TS	S1
Niben261Chr17g1118023	410.916	385.854	397.465	594.019	604.269	620.389	398.078	606.226	-0.606007	1.25356e-09	5.5183e-08	Niben261Chr17g1118023	Niben261Chr17	111878723	111883449	-	4008	protein_coding	- && - && PF12371:Transmembrane protein 131-like	-
Niben261Chr16g0689003	281.798	313.784	303.519	583.377	458.075	470.079	299.7	503.844	-0.750683	1.26276e-09	5.55263e-08	Niben261Chr16g0689003	Niben261Chr16	68968687	68974024	+	1503	protein_coding	- && sp|Q93ZB9|FACR3_ARATH Fatty acyl-CoA reductase 3 OS=Arabidopsis thaliana OX=3702 GN=FAR3 PE=1 SV=1 && PF03015:Male sterility protein|PF07993:Male sterility protein	NAD_binding_4
Niben261Chr01g0979016	655.957	648.634	488.314	386.016	341.12	330.3	597.635	352.478	0.761958	1.27577e-09	5.60362e-08	Niben261Chr01g0979016	Niben261Chr01	97962333	97966254	+	1824	protein_coding	- && sp|Q9FUR2|IP5P2_ARATH Type I inositol polyphosphate 5-phosphatase 2 OS=Arabidopsis thaliana OX=3702 GN=IP5P2 PE=1 SV=2 && PF03372:Endonuclease/Exonuclease/phosphatase family	Exo_endo_phos
Niben261Chr17g0281004	1119.65	1104.34	1127.35	751.715	793.347	834.845	1117.12	793.302	0.49387	1.28041e-09	5.61776e-08	Niben261Chr17g0281004	Niben261Chr17	28099279	28107782	+	5634	protein_coding	- && sp|Q8LGU1|AB8C_ARATH ABC transporter C family member 8 OS=Arabidopsis thaliana OX=3702 GN=ABCC8 PE=2 SV=3 && PF00005:ABC transporter|PF00664:ABC transporter transmembrane region	ABC_tran
Niben261Chr07g0234002	322.324	226.19	182.731	731.399	632.533	777.402	243.748	713.778	-1.5487	1.31141e-09	5.74742e-08	Niben261Chr07g0234002	Niben261Chr07	23407464	23409126	-	1515	protein_coding	- && sp|Q94FM7|C71DK_TOBAC 5-epiaristolochene 1,3-dihydroxylase OS=Nicotiana tabacum OX=4097 GN=CYP71D20 PE=1 SV=2 && PF00067:Cytochrome P450	p450
Niben261Chr13g1474010	114.038	83.1582	87.752	201.231	258.276	180.947	94.9829	213.485	-1.16338	1.32828e-09	5.81491e-08	Niben261Chr13g1474010	Niben261Chr13	147418673	147422915	+	1488	protein_coding	- && sp|Q84MB3|ACCH1_ARATH 1-aminocyclopropane-1-carboxylate oxidase homolog 1 OS=Arabidopsis thaliana OX=3702 GN=At1g06620 PE=2 SV=1 && PF14226:non-haem dioxygenase in morphine synthesis N-terminal|PF03171:2OG-Fe(II) oxygenase superfamily	2OG-FeII_Oxy
Niben261Chr01g1112005	97.0741	76.5056	76.3958	265.084	219.291	142.651	83.3252	209.009	-1.32326	1.33654e-09	5.84328e-08	Niben261Chr01g1112005	Niben261Chr01	111270519	111272087	+	879	protein_coding	- && - && -	-
Niben261Chr08g1058006	61.2604	42.1335	52.6512	144.151	135.473	121.589	52.015	133.738	-1.35565	1.3377e-09	5.84328e-08	Niben261Chr08g1058006	Niben261Chr08	105837461	105841911	+	768	protein_coding	- && sp|Q9C8L4|ETHE1_ARATH Persulfide dioxygenase ETHE1 homolog, mitochondrial OS=Arabidopsis thaliana OX=3702 GN=GLY3 PE=1 SV=3 && PF00753:Metallo-beta-lactamase superfamily	Lactamase_B
Niben261Chr03g0258003	278.97	290.499	312.81	485.664	538.969	435.613	294.093	486.749	-0.727279	1.34622e-09	5.87399e-08	Niben261Chr03g0258003	Niben261Chr03	25795873	25798274	+	645	protein_coding	- && sp|Q9FPJ5|LRR1_ARATH Leucine-rich repeat protein 1 OS=Arabidopsis thaliana OX=3702 GN=LRR1 PE=1 SV=1 && PF08263:Leucine rich repeat N-terminal domain	LRRNT_2
Niben261Chr05g0567001	1241.23	1156.45	1144.91	1587.6	1682.21	1574.91	1180.86	1614.9	-0.450952	1.34987e-09	5.88344e-08	Niben261Chr05g0567001	Niben261Chr05	56700156	56725722	-	3186	protein_coding	- && sp|O22941|IDE1_ARATH Insulin-degrading enzyme-like 1, peroxisomal OS=Arabidopsis thaliana OX=3702 GN=PXM16 PE=2 SV=1 && PF00675:Insulinase (Peptidase family M16)|PF16187:Middle or third domain of peptidase_M16|PF05193:Peptidase M16 inactive domain	-
Niben261Chr01g0454002	657.842	579.89	630.782	923.923	895.683	893.246	622.838	904.284	-0.536575	1.36429e-09	5.93977e-08	Niben261Chr01g0454002	Niben261Chr01	45389739	45391025	+	1287	protein_coding	- && - && PF00168:C2 domain	C2
Niben261Chr08g0372023	236.559	188.492	195.119	364.732	382.054	344.661	206.723	363.816	-0.812139	1.38467e-09	6.02185e-08	Niben261Chr08g0372023	Niben261Chr08	37196522	37204972	+	708	protein_coding	- && sp|P91924|ARF_DUGJA ADP-ribosylation factor OS=Dugesia japonica OX=6161 PE=2 SV=3 && PF00025:ADP-ribosylation factor family	Arf
Niben261Chr06g1054003	556.998	480.1	565.742	773.967	844.028	792.72	534.28	803.571	-0.587339	1.39939e-09	6.07921e-08	Niben261Chr06g1054003	Niben261Chr06	105483734	105487986	-	2175	protein_coding	- && sp|Q9FG77|WRKY2_ARATH Probable WRKY transcription factor 2 OS=Arabidopsis thaliana OX=3702 GN=WRKY2 PE=1 SV=1 && PF03106:WRKY DNA -binding domain	WRKY
Niben261Chr16g0054006	703.08	683.006	698.919	1079.68	1252.4	912.394	695.002	1081.49	-0.63758	1.40663e-09	6.10399e-08	Niben261Chr16g0054006	Niben261Chr16	5347360	5350725	-	744	protein_coding	- && sp|A2X8Q3|IPYR_ORYSI Soluble inorganic pyrophosphatase OS=Oryza sativa subsp. indica OX=39946 GN=IPP PE=2 SV=1 && PF00719:Inorganic pyrophosphatase	Pyrophosphatase
Niben261Chr07g1227002	1117.77	1235.18	1173.81	810.73	767.032	883.672	1175.58	820.478	0.518046	1.44692e-09	6.27195e-08	Niben261Chr07g1227002	Niben261Chr07	122725101	122727119	-	1509	protein_coding	- && sp|Q94C59|PATL4_ARATH Patellin-4 OS=Arabidopsis thaliana OX=3702 GN=PATL4 PE=1 SV=2 && PF00650:CRAL/TRIO domain|PF03765:CRAL/TRIO, N-terminal domain	CRAL_TRIO_N
Niben261Chr06g1422012	115.923	151.902	153.824	297.01	261.2	256.581	140.55	271.597	-0.9542	1.45138e-09	6.28438e-08	Niben261Chr06g1422012	Niben261Chr06	142193347	142194349	-	459	protein_coding	- && sp|A0A3G5BB24|NBS_NARPS Norbelladine synthase OS=Narcissus pseudonarcissus OX=39639 GN=NBS PE=1 SV=1 && PF00407:Pathogenesis-related protein Bet v I family	-
Niben261Chr02g0733001	262.006	278.303	254.997	145.119	124.752	153.183	265.102	141.018	0.909756	1.46011e-09	6.31527e-08	Niben261Chr02g0733001	Niben261Chr02	73320028	73323635	+	1518	protein_coding	- && sp|Q949Z1|PGLR4_ARATH Polygalacturonase At1g48100 OS=Arabidopsis thaliana OX=3702 GN=At1g48100 PE=2 SV=1 && PF00295:Glycosyl hydrolases family 28	-
Niben261Chr05g0698021	1744.51	1750.76	1515.53	1215.13	1186.12	1201.53	1670.26	1200.93	0.475948	1.47137e-09	6.35705e-08	Niben261Chr05g0698021	Niben261Chr05	69853713	69858498	-	2163	protein_coding	- && sp|Q8RWG2|CF107_ARATH Protein high chlorophyll fluorescent 107 OS=Arabidopsis thaliana OX=3702 GN=HCF107 PE=1 SV=1 && -	-
Niben261Chr11g1375001	375.102	481.209	406.756	797.186	597.447	712.299	421.022	702.31	-0.740382	1.48138e-09	6.39335e-08	Niben261Chr11g1375001	Niben261Chr11	137493016	137503543	+	2454	protein_coding	- && sp|K4D9Y4|ASAT3_SOLLC Acylsugar acyltransferase 3 OS=Solanum lycopersicum OX=4081 GN=ASAT3 PE=2 SV=1 && PF02458:Transferase family	-
Niben261Chr05g0843016	32.9863	31.0457	17.5504	88.0387	137.423	75.6339	27.1942	100.365	-1.88147	1.48959e-09	6.42177e-08	Niben261Chr05g0843016	Niben261Chr05	84361671	84363480	+	462	protein_coding	- && - && PF06521:PAR1 protein	-
Niben261Chr10g0616010	46.1809	54.33	46.4569	127.705	131.575	115.844	48.9893	125.041	-1.35478	1.52067e-09	6.54863e-08	Niben261Chr10g0616010	Niben261Chr10	61599574	61602342	-	1002	protein_coding	- && sp|Q0S7Q1|IPDC_RHOJR (3aS,4S,5R,7aS)-5-hydroxy-7a-methyl-1-oxo-octahydro-1H-indene-4-carboxyl-CoA dehydrogenase OS=Rhodococcus jostii (strain RHA1) OX=101510 GN=ipdC PE=3 SV=1 && PF03060:Nitronate monooxygenase	NPD
Niben261Chr01g1704007	5691.56	6203.6	5761.69	4643.8	4068.1	4577.29	5885.62	4429.73	0.40977	1.53653e-09	6.60975e-08	Niben261Chr01g1704007	Niben261Chr01	170380752	170382723	+	837	protein_coding	- && sp|P49314|ROC2_NICPL 31 kDa ribonucleoprotein, chloroplastic OS=Nicotiana plumbaginifolia OX=4092 PE=2 SV=1 && PF00076:RNA recognition motif. (a.k.a. RRM, RBD, or RNP domain)	RRM_1
Niben261Chr06g0234016	5576.58	5130.31	5200.08	6851.54	7274.62	6564.83	5302.32	6897	-0.379097	1.59583e-09	6.8574e-08	Niben261Chr06g0234016	Niben261Chr06	23407546	23419901	+	1524	protein_coding	- && sp|Q9XF61|PDI_DATGL Protein disulfide-isomerase OS=Datisca glomerata OX=34297 GN=PDI PE=2 SV=1 && PF13848:Thioredoxin-like domain|PF00085:Thioredoxin	-
Niben261Chr01g0205006	2372.19	2043.47	2011.07	2918.82	2881	2957.38	2142.24	2919.07	-0.445654	1.62251e-09	6.9645e-08	Niben261Chr01g0205006	Niben261Chr01	20527037	20537524	-	3111	protein_coding	- && sp|C0LGE0|Y1765_ARATH Probable LRR receptor-like serine/threonine-protein kinase At1g07650 OS=Arabidopsis thaliana OX=3702 GN=At1g07650 PE=1 SV=1 && PF13855:Leucine rich repeat|PF07714:Protein tyrosine kinase|PF11721:Malectin domain	Pkinase_Tyr
Niben261Chr02g1090018	1436.32	1510.15	1411.26	1082.59	946.363	1079.94	1452.58	1036.3	0.486789	1.62946e-09	6.98673e-08	Niben261Chr02g1090018	Niben261Chr02	109053426	109060414	+	1666	protein_coding	- && sp|Q6TBX7|LUT1_ARATH Carotene epsilon-monooxygenase, chloroplastic OS=Arabidopsis thaliana OX=3702 GN=CYP97C1 PE=1 SV=1 && PF00067:Cytochrome P450	p450
Niben261Chr13g0961005	15562	15868.8	16137.1	13082	12133.1	11095.2	15856	12103.4	0.389602	1.63941e-09	7.02181e-08	Niben261Chr13g0961005	Niben261Chr13	96160309	96163515	+	834	protein_coding	- && sp|Q9SMB4|PSBS_TOBAC Photosystem II 22 kDa protein, chloroplastic OS=Nicotiana tabacum OX=4097 GN=PSBS PE=2 SV=1 && PF00504:Chlorophyll A-B binding protein	-
Niben261Chr01g1227001	328.921	283.847	294.227	561.126	514.603	440.4	302.332	505.376	-0.73936	1.68408e-09	7.20536e-08	Niben261Chr01g1227001	Niben261Chr01	122724714	122728496	+	1179	protein_coding	- && sp|Q84K00|NAC78_ARATH NAC domain-containing protein 78 OS=Arabidopsis thaliana OX=3702 GN=NAC078 PE=2 SV=2 && PF02365:No apical meristem (NAM) protein	NAM
novel.5756	1024.46	950.221	1042.7	632.718	635.457	762.083	1005.79	676.753	0.571898	1.72955e-09	7.39191e-08	-	Niben261Chr16	56182671	56185181	+	2384	-	- && Q8L868.1 RecName: Full=Glucan endo-1,3-beta-glucosidase 11; AltName: Full=(1->3)-beta-glucan endohydrolase 11; Short=(1->3)-beta-glucanase 11; AltName: Full=Beta-1,3-endoglucanase 11; Short=Beta-1,3-glucanase 11; Flags: Precursor && PF00332:Glycosyl hydrolases family 17	Glyco_hydro_17
Niben261Chr14g1531005	3849.03	4004.9	4070.66	3179.07	2982.36	3093.33	3974.86	3084.92	0.365499	1.75568e-09	7.4955e-08	Niben261Chr14g1531005	Niben261Chr14	153078999	153082606	-	657	protein_coding	- && sp|Q9MAP3|RK11_ARATH 50S ribosomal protein L11, chloroplastic OS=Arabidopsis thaliana OX=3702 GN=RPL11 PE=2 SV=1 && PF03946:Ribosomal protein L11, N-terminal domain|PF00298:Ribosomal protein L11, RNA binding domain	-
Niben261Chr07g0009017	12326.5	11816.2	11758.8	8993.49	8290.18	9866.87	11967.2	9050.18	0.403084	1.76111e-09	7.51061e-08	Niben261Chr07g0009017	Niben261Chr07	886616	891541	+	2226	protein_coding	- && sp|Q43848|TKTC_SOLTU Transketolase, chloroplastic OS=Solanum tuberosum OX=4113 PE=2 SV=1 && PF02779:Transketolase, pyrimidine binding domain|PF02780:Transketolase, C-terminal domain|PF00456:Transketolase, thiamine diphosphate binding domain	-
Niben261Chr07g1286014	10.3671	25.5019	10.3238	85.1363	77.9702	53.6139	15.3976	72.2401	-2.24939	1.7712e-09	7.53787e-08	Niben261Chr07g1286014	Niben261Chr07	128641600	128642915	+	996	protein_coding	- && sp|A2XQE8|SAG39_ORYSI Senescence-specific cysteine protease SAG39 OS=Oryza sativa subsp. indica OX=39946 GN=OsI_14861 PE=3 SV=1 && PF00112:Papain family cysteine protease|PF08246:Cathepsin propeptide inhibitor domain (I29)	Peptidase_C1
Niben261Chr11g1058001	645.59	627.567	581.228	890.062	887.886	894.203	618.128	890.717	-0.526673	1.77131e-09	7.53787e-08	Niben261Chr11g1058001	Niben261Chr11	105790001	105807267	-	1518	protein_coding	- && sp|Q9LPL6|TOL3_ARATH TOM1-like protein 3 OS=Arabidopsis thaliana OX=3702 GN=TOL3 PE=1 SV=1 && PF03127:GAT domain|PF00790:VHS domain	-
novel.2027	79.1672	106.443	80.5253	195.427	221.24	168.501	88.7117	195.056	-1.14104	1.80819e-09	7.68655e-08	-	Niben261Chr06	11695712	11698040	+	1294	-	- && - && -	-
Niben261Chr04g1627009	235.617	297.152	259.126	497.274	396.673	465.292	263.965	453.08	-0.782215	1.83464e-09	7.79063e-08	Niben261Chr04g1627009	Niben261Chr04	162722231	162724297	+	1017	protein_coding	- && sp|Q8W013|COMT1_CATRO Caffeic acid 3-O-methyltransferase OS=Catharanthus roseus OX=4058 GN=COMT1 PE=2 SV=1 && PF08100:Dimerisation domain|PF00891:O-methyltransferase domain	-
Niben261Chr14g0040001	3050.77	2918.3	2852.46	2253.21	2172.45	2320.72	2940.51	2248.79	0.387096	1.84646e-09	7.82482e-08	Niben261Chr14g0040001	Niben261Chr14	3878674	3889847	-	1551	protein_coding	- && sp|Q6STH5|HF101_ARATH Fe-S cluster assembly factor HCF101, chloroplastic OS=Arabidopsis thaliana OX=3702 GN=HCF101 PE=1 SV=1 && PF06155:Protein of unknown function (DUF971)|PF10609:NUBPL iron-transfer P-loop NTPase|PF01883:Iron-sulfur cluster assembly protein	-
Niben261Chr08g1237022	139.485	177.404	145.565	70.6245	69.1986	55.5287	154.151	65.1172	1.2413	1.84664e-09	7.82482e-08	Niben261Chr08g1237022	Niben261Chr08	123706937	123708461	-	747	protein_coding	- && sp|Q7Y1Z0|CHI5_ORYSJ Chitinase 5 OS=Oryza sativa subsp. japonica OX=39947 GN=Cht5 PE=2 SV=1 && PF00187:Chitin recognition protein|PF00182:Chitinase class I	-
novel.6779	35.8137	25.5019	38.1979	0	0	0	33.1712	0	7.54609	1.8783e-09	7.95046e-08	-	Niben261Chr19	91699041	91701232	+	884	-	- && - && -	-
Niben261Chr05g0537004	409.973	322.654	299.389	608.531	582.827	535.182	344.005	575.513	-0.739679	1.91061e-09	8.07861e-08	Niben261Chr05g0537004	Niben261Chr05	53771884	53776308	+	3693	protein_coding	- && sp|A0A1P8BH59|PICBP_ARATH Calmodulin binding protein PICBP OS=Arabidopsis thaliana OX=3702 GN=PICBP PE=2 SV=1 && PF07839:Plant calmodulin-binding domain	-
Niben261Chr17g0513001	4308.96	4336.42	4546.58	3240.02	3146.1	3595.96	4397.32	3327.36	0.402168	1.91693e-09	8.09668e-08	Niben261Chr17g0513001	Niben261Chr17	51357359	51359931	+	1116	protein_coding	- && sp|Q9ZRR5|TBA3_HORVU Tubulin alpha-3 chain OS=Hordeum vulgare OX=4513 GN=TUBA3 PE=2 SV=1 && PF00091:Tubulin/FtsZ family, GTPase domain|PF03953:Tubulin C-terminal domain	Tubulin_C
Niben261Chr01g1007002	724.757	717.378	716.469	499.209	430.785	504.545	719.535	478.18	0.589425	1.91907e-09	8.09709e-08	Niben261Chr01g1007002	Niben261Chr01	100719756	100722004	+	927	protein_coding	- && sp|Q9SK91|BH094_ARATH Transcription factor bHLH94 OS=Arabidopsis thaliana OX=3702 GN=BHLH94 PE=1 SV=2 && PF00010:Helix-loop-helix DNA-binding domain	HLH
Niben261Chr09g1049004	81.9946	87.5933	64.0073	199.296	147.169	189.563	77.8651	178.676	-1.19932	1.95041e-09	8.22057e-08	Niben261Chr09g1049004	Niben261Chr09	104973781	104975755	-	1335	protein_coding	- && sp|Q58VT1|PUN1_CAPFR Acyltransferase Pun1 OS=Capsicum frutescens OX=4073 GN=PUN1 PE=3 SV=1 && PF02458:Transferase family	-
Niben261Chr08g0554020	695.541	673.027	674.142	1010.03	1006.79	910.479	680.903	975.765	-0.518643	1.9843e-09	8.35453e-08	Niben261Chr08g0554020	Niben261Chr08	55100470	55113125	+	1536	protein_coding	- && sp|Q9FKG3|PFKA4_ARATH ATP-dependent 6-phosphofructokinase 4, chloroplastic OS=Arabidopsis thaliana OX=3702 GN=PFK4 PE=1 SV=1 && PF00365:Phosphofructokinase	PFK
Niben261Chr07g0042008	2154.48	2129.96	2378.59	1637.91	1642.25	1686.92	2221.01	1655.69	0.423785	2.01618e-09	8.47975e-08	Niben261Chr07g0042008	Niben261Chr07	4272060	4273016	-	957	protein_coding	- && sp|Q5NUF4|HIDM_GLYEC 2-hydroxyisoflavanone dehydratase OS=Glycyrrhiza echinata OX=46348 GN=HIDM PE=1 SV=1 && PF07859:alpha/beta hydrolase fold	Abhydrolase_3
Niben261Chr09g1233014	1118.71	1123.19	1108.77	794.283	729.996	841.547	1116.89	788.609	0.50194	2.06959e-09	8.69512e-08	Niben261Chr09g1233014	Niben261Chr09	123353810	123358178	+	1170	protein_coding	- && sp|O65502|HC244_ARATH Protein HIGH CHLOROPHYLL FLUORESCENCE PHENOTYPE 244, chloroplastic OS=Arabidopsis thaliana OX=3702 GN=HCF244 PE=1 SV=1 && PF05368:NmrA-like family	NmrA
Niben261Chr09g0179011	2253.44	2116.65	2220.64	2868.51	2891.72	2802.28	2196.91	2854.17	-0.377198	2.10969e-09	8.85423e-08	Niben261Chr09g0179011	Niben261Chr09	17891586	17896079	-	1083	protein_coding	- && sp|Q56WD9|THIK2_ARATH 3-ketoacyl-CoA thiolase 2, peroxisomal OS=Arabidopsis thaliana OX=3702 GN=PED1 PE=1 SV=2 && PF02803:Thiolase, C-terminal domain|PF00108:Thiolase, N-terminal domain	Thiolase_C
Niben261Chr11g1269003	729.469	641.981	729.89	471.152	461.974	467.207	700.447	466.778	0.586571	2.13643e-09	8.95697e-08	Niben261Chr11g1269003	Niben261Chr11	126921388	126924341	-	1860	protein_coding	- && sp|Q9S7Z8|PIN3_ARATH Auxin efflux carrier component 3 OS=Arabidopsis thaliana OX=3702 GN=PIN3 PE=1 SV=1 && PF03547:Membrane transport protein	-
Niben261Chr07g1142008	79.1672	65.4178	85.6872	21.2841	26.3149	12.4461	76.7574	20.015	1.94228	2.1598e-09	9.04537e-08	Niben261Chr07g1142008	Niben261Chr07	114198354	114198902	+	549	protein_coding	- && - && PF14009:Domain of unknown function (DUF4228)	-
Niben261Chr02g0493018	1609.73	1809.52	1680.71	1258.66	1224.13	1261.84	1699.99	1248.21	0.444934	2.16589e-09	9.0613e-08	Niben261Chr02g0493018	Niben261Chr02	49340393	49351698	+	1248	protein_coding	- && sp|Q93ZB6|DCUP1_ARATH Uroporphyrinogen decarboxylase 1, chloroplastic OS=Arabidopsis thaliana OX=3702 GN=HEME1 PE=2 SV=2 && PF01208:Uroporphyrinogen decarboxylase (URO-D)	-
Niben261Chr06g0557015	2111.13	2062.32	1993.52	1578.89	1343.04	1551.93	2055.66	1491.29	0.46308	2.17953e-09	9.10873e-08	Niben261Chr06g0557015	Niben261Chr06	55658485	55660114	-	570	protein_coding	- && - && PF06549:Protein of unknown function (DUF1118)	-
Niben261Chr04g0243008	20.7343	9.97899	7.22663	62.8848	73.0971	55.5287	12.6466	63.8368	-2.31541	2.21624e-09	9.25238e-08	Niben261Chr04g0243008	Niben261Chr04	24238723	24239233	+	414	protein_coding	- && sp|P23547|E13G_TOBAC Glucan endo-1,3-beta-glucosidase, acidic isoform GI9 OS=Nicotiana tabacum OX=4097 GN=PR2 PE=1 SV=1 && PF00332:Glycosyl hydrolases family 17	Glyco_hydro_17
Niben261Chr18g1463005	438.247	401.377	330.36	240.897	218.317	198.18	389.995	219.131	0.832656	2.22192e-09	9.26635e-08	Niben261Chr18g1463005	Niben261Chr18	146332739	146340086	+	1548	protein_coding	- && sp|Q8H1Z0|CER3_ARATH Very-long-chain aldehyde decarbonylase CER3 OS=Arabidopsis thaliana OX=3702 GN=CER3 PE=1 SV=1 && PF04116:Fatty acid hydroxylase superfamily|PF12076:WAX2 C-terminal domain	-
Niben261Chr17g1494009	218.652	228.408	182.731	107.388	100.387	102.441	209.93	103.405	1.02124	2.24036e-09	9.33343e-08	Niben261Chr17g1494009	Niben261Chr17	149434555	149438168	+	1425	protein_coding	- && sp|Q9SYD6|DTX42_ARATH Protein DETOXIFICATION 42 OS=Arabidopsis thaliana OX=3702 GN=DTX42 PE=2 SV=2 && PF01554:MatE	MatE
Niben261Chr06g0753021	1401.45	1448.06	1478.36	1096.13	946.363	1060.79	1442.62	1034.43	0.479566	2.28469e-09	9.50811e-08	Niben261Chr06g0753021	Niben261Chr06	75353836	75363263	-	1887	protein_coding	- && sp|P93568|SSY1_SOLTU Soluble starch synthase 1, chloroplastic/amyloplastic OS=Solanum tuberosum OX=4113 PE=2 SV=1 && PF08323:Starch synthase catalytic domain	-
Niben261Chr12g0712005	65.9727	62.0915	50.5864	151.891	133.524	141.694	59.5502	142.37	-1.25601	2.3034e-09	9.56598e-08	Niben261Chr12g0712005	Niben261Chr12	71271348	71272857	-	1296	protein_coding	- && sp|Q94J16|HFA4B_ORYSJ Heat stress transcription factor A-4b OS=Oryza sativa subsp. japonica OX=39947 GN=HSFA4B PE=2 SV=1 && PF00447:HSF-type DNA-binding	HSF_DNA-bind
Niben261Chr15g1173001	676.691	750.641	621.49	1070.01	1019.46	938.243	682.941	1009.24	-0.564242	2.30343e-09	9.56598e-08	Niben261Chr15g1173001	Niben261Chr15	117285097	117288732	+	1389	protein_coding	- && sp|Q8VWZ7|C76B6_CATRO Geraniol 8-hydroxylase OS=Catharanthus roseus OX=4058 GN=CYP76B6 PE=1 SV=1 && PF00067:Cytochrome P450	p450
Niben261Chr16g0006006	1867.97	1888.25	1731.29	1427.97	1272.86	1310.67	1829.17	1337.17	0.451964	2.31354e-09	9.59794e-08	Niben261Chr16g0006006	Niben261Chr16	547449	555359	+	585	protein_coding	- && sp|Q8GUU2|RIE1_ARATH E3 ubiquitin protein ligase RIE1 OS=Arabidopsis thaliana OX=3702 GN=RIE1 PE=2 SV=1 && PF13639:Ring finger domain	-
Niben261Chr18g0684004	96.1316	117.53	101.173	204.134	233.911	199.137	104.945	212.394	-1.02018	2.32964e-09	9.65458e-08	Niben261Chr18g0684004	Niben261Chr18	68407581	68412980	-	1353	protein_coding	- && sp|Q9ZPS3|DCE4_ARATH Glutamate decarboxylase 4 OS=Arabidopsis thaliana OX=3702 GN=GAD4 PE=1 SV=1 && PF00282:Pyridoxal-dependent decarboxylase conserved domain	-
Niben261Chr07g1353002	154.565	144.141	135.241	267.986	270.946	258.496	144.649	265.809	-0.876508	2.3418e-09	9.69484e-08	Niben261Chr07g1353002	Niben261Chr07	135361018	135371020	+	1890	protein_coding	- && sp|Q94BV7|NDB2_ARATH External alternative NAD(P)H-ubiquinone oxidoreductase B2, mitochondrial OS=Arabidopsis thaliana OX=3702 GN=NDB2 PE=1 SV=1 && PF07992:Pyridine nucleotide-disulphide oxidoreductase	Pyr_redox_2
Niben261Chr11g1317009	47722.8	44659.3	45076.6	34474.4	31154	37765.2	45819.6	34464.5	0.410861	2.38363e-09	9.85772e-08	Niben261Chr11g1317009	Niben261Chr11	131744352	131747231	+	1221	protein_coding	- && sp|P09043|G3PA_TOBAC Glyceraldehyde-3-phosphate dehydrogenase A, chloroplastic (Fragment) OS=Nicotiana tabacum OX=4097 GN=GAPA PE=2 SV=1 && PF00044:Glyceraldehyde 3-phosphate dehydrogenase, NAD binding domain|PF02800:Glyceraldehyde 3-phosphate dehydrogenase, C-terminal domain	-
novel.1734	170.587	127.509	155.889	254.442	324.551	292.004	151.328	290.332	-0.936133	2.43618e-09	1.00646e-07	-	Niben261Chr05	73906868	73910769	+	1551	-	- && Q9ZU94.2 RecName: Full=Cysteine-rich repeat secretory protein 12; AltName: Full=Plasmodesmata-located protein 6; Short=PDLP6; Flags: Precursor && -	-
Niben261Chr19g0071003	130.06	110.878	110.464	208.971	275.82	224.987	117.134	236.593	-1.01154	2.45304e-09	1.01236e-07	Niben261Chr19g0071003	Niben261Chr19	7178760	7181208	+	1557	protein_coding	- && sp|A0A0S2IHL2|C7A39_KALSE Cytochrome P450 72A397 OS=Kalopanax septemlobus OX=228393 GN=CYP72A397 PE=1 SV=1 && PF00067:Cytochrome P450	p450
Niben261Chr10g0629016	233.732	249.475	268.418	133.509	145.22	110.1	250.541	129.61	0.950645	2.47606e-09	1.0208e-07	Niben261Chr10g0629016	Niben261Chr10	62829294	62832143	+	1653	protein_coding	- && - && -	-
Niben261Chr01g0143013	553.228	495.623	502.767	847.494	912.252	689.322	517.206	816.356	-0.657326	2.51137e-09	1.03428e-07	Niben261Chr01g0143013	Niben261Chr01	14349235	14352307	-	1578	protein_coding	- && sp|H2DH21|C7A29_PANGI Cytochrome P450 CYP72A219 OS=Panax ginseng OX=4054 PE=2 SV=1 && PF00067:Cytochrome P450	p450
novel.3732	329.863	338.177	347.911	153.826	131.575	225.944	338.65	170.448	0.989635	2.52941e-09	1.04063e-07	-	Niben261Chr10	51665137	51666064	-	618	-	- && Q8H5T6.1 RecName: Full=Hydrophobic protein LTI6A; AltName: Full=Low temperature-induced protein 6A && PF01679:Proteolipid membrane potential modulator	-
Niben261Chr09g1212002	47.1233	47.6774	50.5864	134.477	130.6	107.228	48.4624	124.102	-1.35668	2.54119e-09	1.04439e-07	Niben261Chr09g1212002	Niben261Chr09	121252073	121254797	+	784	protein_coding	- && sp|Q5PP62|SPX3_ARATH SPX domain-containing protein 3 OS=Arabidopsis thaliana OX=3702 GN=SPX3 PE=2 SV=1 && PF03105:SPX domain	SPX
Niben261Chr03g0011015	1686.07	1638.77	1751.94	1284.78	1190.02	1280.99	1692.26	1251.93	0.434895	2.59424e-09	1.06509e-07	Niben261Chr03g0011015	Niben261Chr03	1174618	1177834	-	1347	protein_coding	- && sp|A7PZL3|PGLR_VITVI Probable polygalacturonase OS=Vitis vinifera OX=29760 GN=GSVIVT00026920001 PE=1 SV=1 && PF00295:Glycosyl hydrolases family 28	-
Niben261Chr07g1387002	2686.97	2620.04	2481.83	3525.42	3219.2	3490.65	2596.28	3411.75	-0.393953	2.60567e-09	1.06867e-07	Niben261Chr07g1387002	Niben261Chr07	138736471	138738525	+	1176	protein_coding	- && sp|P92980|APR3_ARATH 5'-adenylylsulfate reductase 3, chloroplastic OS=Arabidopsis thaliana OX=3702 GN=APR3 PE=2 SV=2 && PF01507:Phosphoadenosine phosphosulfate reductase family|PF00085:Thioredoxin	-
Niben261Chr02g0138002	3688.82	3565.82	3412	2673.09	2578.86	2865.47	3555.55	2705.81	0.394098	2.66414e-09	1.09153e-07	Niben261Chr02g0138002	Niben261Chr02	13802854	13815720	-	1686	protein_coding	- && sp|Q9LXV3|DIT1_ARATH Dicarboxylate transporter 1, chloroplastic OS=Arabidopsis thaliana OX=3702 GN=DIT1 PE=1 SV=1 && PF00939:Sodium:sulfate symporter transmembrane region	Na_sulph_symp
novel.3288	25.4466	25.5019	12.3885	80.299	86.7419	69.8895	21.1123	78.9768	-1.90214	2.68761e-09	1.10001e-07	-	Niben261Chr09	16676392	16680013	-	2525	-	- && P04146.3 RecName: Full=Copia protein; AltName: Full=Gag-int-pol protein; Contains: RecName: Full=Copia VLP protein; Contains: RecName: Full=Copia protease && -	-
Niben261Chr05g0931005	15972	16473.1	16604.7	13474.8	12559.1	11317.3	16349.9	12450.4	0.393083	2.74418e-09	1.12086e-07	Niben261Chr05g0931005	Niben261Chr05	93106548	93109759	-	825	protein_coding	- && sp|Q9SMB4|PSBS_TOBAC Photosystem II 22 kDa protein, chloroplastic OS=Nicotiana tabacum OX=4097 GN=PSBS PE=2 SV=1 && PF00504:Chlorophyll A-B binding protein	-
Niben261Chr19g1071002	31.1014	15.5229	14.4533	69.657	90.6404	79.4635	20.3592	79.9203	-1.95679	2.74422e-09	1.12086e-07	Niben261Chr19g1071002	Niben261Chr19	107137431	107140189	+	1206	protein_coding	- && sp|Q9FW03|MES11_ARATH Putative methylesterase 11, chloroplastic OS=Arabidopsis thaliana OX=3702 GN=MES11 PE=1 SV=1 && PF12697:Alpha/beta hydrolase family	-
novel.302	2226.11	2279.64	2297.04	1776.25	1614.96	1743.41	2267.6	1711.54	0.405687	2.74923e-09	1.12175e-07	-	Niben261Chr01	68584500	68597103	-	973	-	- && P82024.1 RecName: Full=30S ribosomal protein S21, chloroplastic && PF01165:Ribosomal protein S21	-
Niben261Chr03g0351010	647.475	668.592	643.17	421.812	407.394	468.164	653.079	432.457	0.594242	2.75918e-09	1.12465e-07	Niben261Chr03g0351010	Niben261Chr03	35150518	35153719	+	1941	protein_coding	- && sp|Q9SX31|PERK9_ARATH Proline-rich receptor-like protein kinase PERK9 OS=Arabidopsis thaliana OX=3702 GN=PERK9 PE=1 SV=1 && PF07714:Protein tyrosine kinase|PF13855:Leucine rich repeat	Pkinase_Tyr
Niben261Chr02g0771002	1589	1878.27	1734.39	1259.63	1118.87	1288.65	1733.89	1222.38	0.503466	2.77407e-09	1.12956e-07	Niben261Chr02g0771002	Niben261Chr02	77153276	77155746	+	507	protein_coding	- && sp|P42732|RR13_ARATH 30S ribosomal protein S13, chloroplastic OS=Arabidopsis thaliana OX=3702 GN=RPS13 PE=2 SV=1 && PF00416:Ribosomal protein S13/S18	-
Niben261Chr01g0800003	79.1672	73.1792	64.0073	149.956	163.737	168.501	72.1179	160.731	-1.15457	2.9262e-09	1.19028e-07	Niben261Chr01g0800003	Niben261Chr01	79992931	79994533	+	1287	protein_coding	- && sp|P49598|P2C37_ARATH Protein phosphatase 2C 37 OS=Arabidopsis thaliana OX=3702 GN=PP2CA PE=1 SV=1 && PF00481:Protein phosphatase 2C	PP2C
Niben261Chr07g1499001	146.082	192.927	195.119	363.764	317.729	301.578	178.043	327.69	-0.883598	2.96191e-09	1.20357e-07	Niben261Chr07g1499001	Niben261Chr07	149885478	149889570	+	1170	protein_coding	- && sp|Q6NQK2|NAC8_ARATH SUPPRESSOR OF GAMMA RESPONSE 1 OS=Arabidopsis thaliana OX=3702 GN=SOG1 PE=1 SV=1 && PF02365:No apical meristem (NAM) protein	NAM
Niben261Chr09g0275001	636.165	613.153	625.62	951.979	993.146	822.399	624.979	922.508	-0.561265	3.00673e-09	1.22053e-07	Niben261Chr09g0275001	Niben261Chr09	27541524	27545758	+	474	protein_coding	- && sp|B7FKW7|CYNS_MEDTR Cyanate hydratase OS=Medicago truncatula OX=3880 GN=CYN PE=2 SV=1 && PF02560:Cyanate lyase C-terminal domain	Cyanate_lyase
Niben261Chr18g0816004	138.543	149.685	116.659	267.019	256.327	242.22	134.962	255.189	-0.919981	3.01653e-09	1.22325e-07	Niben261Chr18g0816004	Niben261Chr18	81591779	81595422	-	2802	protein_coding	- && sp|Q6L439|R1A4_SOLDE Putative late blight resistance protein homolog R1A-4 OS=Solanum demissum OX=50514 GN=R1A-4 PE=5 SV=2 && PF00931:NB-ARC domain	NB-ARC
Niben261Chr07g0279003	1253.48	1160.89	1218.2	1626.3	1603.26	1654.37	1210.86	1627.98	-0.426424	3.07975e-09	1.24752e-07	Niben261Chr07g0279003	Niben261Chr07	27889720	27896277	-	2340	protein_coding	- && sp|Q41142|PLDA1_RICCO Phospholipase D alpha 1 OS=Ricinus communis OX=3988 GN=PLD1 PE=1 SV=1 && PF12357:Phospholipase D C terminal|PF00168:C2 domain|PF00614:Phospholipase D Active site motif	C2
Niben261Chr10g0427006	1473.08	1418.12	1342.09	1016.8	924.922	1076.11	1411.1	1005.94	0.488405	3.08268e-09	1.24752e-07	Niben261Chr10g0427006	Niben261Chr10	42709720	42716989	+	1815	protein_coding	- && sp|O65502|HC244_ARATH Protein HIGH CHLOROPHYLL FLUORESCENCE PHENOTYPE 244, chloroplastic OS=Arabidopsis thaliana OX=3702 GN=HCF244 PE=1 SV=1 && PF10250:GDP-fucose protein O-fucosyltransferase|PF13460:NAD(P)H-binding	-
Niben261Chr18g1055004	2052.69	2151.03	2001.78	1449.25	1459.02	1649.58	2068.5	1519.29	0.444887	3.09553e-09	1.25145e-07	Niben261Chr18g1055004	Niben261Chr18	105547960	105563892	+	1404	protein_coding	- && sp|P52410|KASC1_ARATH 3-oxoacyl-[acyl-carrier-protein] synthase I, chloroplastic OS=Arabidopsis thaliana OX=3702 GN=KAS1 PE=1 SV=2 && PF02801:Beta-ketoacyl synthase, C-terminal domain|PF00109:Beta-ketoacyl synthase, N-terminal domain	ketoacyl-synt
Niben261Chr05g1077024	575.847	597.63	534.771	966.491	967.805	741.978	569.416	892.091	-0.647811	3.12075e-09	1.26036e-07	Niben261Chr05g1077024	Niben261Chr05	107725828	107733131	+	1419	protein_coding	- && sp|P38025|PUR7_ARATH Phosphoribosylaminoimidazole-succinocarboxamide synthase, chloroplastic OS=Arabidopsis thaliana OX=3702 GN=PUR7 PE=2 SV=2 && PF01259:SAICAR synthetase	-
Niben261Chr07g0995001	2747.29	2693.22	2537.58	2078.1	1957.05	2044.99	2659.36	2026.71	0.392032	3.17157e-09	1.27958e-07	Niben261Chr07g0995001	Niben261Chr07	99483698	99490148	-	1542	protein_coding	- && - && PF09273:Rubisco LSMT substrate-binding	-
Niben261Chr04g0782009	932.1	953.547	966.304	575.638	478.542	716.128	950.65	590.103	0.687556	3.29279e-09	1.32713e-07	Niben261Chr04g0782009	Niben261Chr04	78216077	78217275	+	894	protein_coding	- && sp|Q93XM7|MCAT_ARATH Mitochondrial carnitine/acylcarnitine carrier-like protein OS=Arabidopsis thaliana OX=3702 GN=BOU PE=1 SV=1 && PF00153:Mitochondrial carrier protein	Mito_carr
Niben261Chr19g1209005	269.546	311.566	294.227	483.729	459.05	454.761	291.78	465.847	-0.67692	3.33479e-09	1.34269e-07	Niben261Chr19g1209005	Niben261Chr19	120951311	120960876	-	3735	protein_coding	- && sp|Q9M0M2|AB9B_ARATH ABC transporter B family member 9 OS=Arabidopsis thaliana OX=3702 GN=ABCB9 PE=3 SV=2 && PF00664:ABC transporter transmembrane region|PF00005:ABC transporter	ABC_membrane
Niben261Chr09g0698013	44.2959	43.2423	49.5541	112.225	133.524	110.1	45.6974	118.616	-1.37567	3.34884e-09	1.34698e-07	Niben261Chr09g0698013	Niben261Chr09	69770857	69773686	-	921	protein_coding	- && sp|Q38908|XTH30_ARATH Probable xyloglucan endotransglucosylase/hydrolase protein 30 OS=Arabidopsis thaliana OX=3702 GN=XTH30 PE=2 SV=2 && PF00722:Glycosyl hydrolases family 16|PF06955:Xyloglucan endo-transglycosylase (XET) C-terminus	-
Niben261Chr03g1133003	156.45	157.446	174.472	76.4292	73.0971	75.6339	162.789	75.0534	1.11681	3.35999e-09	1.3501e-07	Niben261Chr03g1133003	Niben261Chr03	113380327	113381645	-	564	protein_coding	- && sp|Q9FJF4|MBD7_ARATH Methyl-CpG-binding domain-containing protein 7 OS=Arabidopsis thaliana OX=3702 GN=MBD7 PE=1 SV=1 && PF01429:Methyl-CpG binding domain	MBD
Niben261Chr17g1423004	2178.04	2044.58	1919.19	1357.34	1388.84	1619.91	2047.27	1455.36	0.492507	3.3916e-09	1.36142e-07	Niben261Chr17g1423004	Niben261Chr17	142285460	142351340	-	2823	protein_coding	- && sp|Q8GZQ3|PNP1_ARATH Polyribonucleotide nucleotidyltransferase 1, chloroplastic OS=Arabidopsis thaliana OX=3702 GN=PNP1 PE=1 SV=1 && PF01138:3' exoribonuclease family, domain 1|PF03725:3' exoribonuclease family, domain 2|PF00575:S1 RNA binding domain	RNase_PH
Niben261Chr01g0387012	62.2028	69.8529	55.7483	144.151	131.575	165.629	62.6013	147.118	-1.23489	3.41573e-09	1.36972e-07	Niben261Chr01g0387012	Niben261Chr01	38599365	38601116	-	1752	protein_coding	- && sp|Q69VG1|CIGR1_ORYSJ Chitin-inducible gibberellin-responsive protein 1 OS=Oryza sativa subsp. japonica OX=39947 GN=CIGR1 PE=2 SV=1 && PF03514:GRAS domain family	GRAS
Niben261Chr18g1229009	553.228	523.342	536.836	1308.97	1582.8	958.348	537.802	1283.37	-1.25462	3.47308e-09	1.3913e-07	Niben261Chr18g1229009	Niben261Chr18	122901961	122903960	+	1371	protein_coding	- && sp|O22822|U74F2_ARATH UDP-glycosyltransferase 74F2 OS=Arabidopsis thaliana OX=3702 GN=UGT74F2 PE=1 SV=1 && PF00201:UDP-glucoronosyl and UDP-glucosyl transferase	UDPGT
novel.595	41.4685	55.4388	61.9426	0	0.974628	0	52.95	0.324876	7.25447	3.50665e-09	1.40333e-07	-	Niben261Chr02	139383853	139388074	+	913	-	- && - && -	-
Niben261Chr04g0482004	94.2467	68.7441	51.6188	176.077	179.331	157.97	71.5365	171.126	-1.25232	3.5462e-09	1.41773e-07	Niben261Chr04g0482004	Niben261Chr04	48207771	48214100	+	3477	protein_coding	- && sp|O22864|NLP8_ARATH Protein NLP8 OS=Arabidopsis thaliana OX=3702 GN=NLP8 PE=2 SV=1 && PF00564:PB1 domain|PF02042:RWP-RK domain	RWP-RK
novel.3582	822.774	756.185	883.714	1174.49	1111.08	1217.8	820.891	1167.79	-0.507936	3.62419e-09	1.44745e-07	-	Niben261Chr10	81991460	81995245	+	1811	-	- && Q0D5W6.1 RecName: Full=Protein translation factor SUI1 homolog; AltName: Full=Protein GOS2; AltName: Full=Protein eIF1; AltName: Full=Translation initiation factor 1 >A6MZM2.1 RecName: Full=Protein translation factor SUI1 homolog; AltName: Full=Protein GOS2; AltName: Full=Protein eIF1; AltName: Full=Translation initiation factor 1 && PF01253:Translation initiation factor SUI1	SUI1
Niben261Chr04g0741004	269.546	290.499	299.389	153.826	133.524	178.075	286.478	155.142	0.883667	3.63541e-09	1.45047e-07	Niben261Chr04g0741004	Niben261Chr04	74119400	74125243	+	1077	protein_coding	- && sp|A3C057|SPL17_ORYSJ Squamosa promoter-binding-like protein 17 OS=Oryza sativa subsp. japonica OX=39947 GN=SPL17 PE=2 SV=2 && PF03110:SBP domain	SBP
novel.1397	237.502	297.152	271.515	493.404	423.963	426.996	268.723	448.121	-0.740492	3.7302e-09	1.48679e-07	-	Niben261Chr04	146639420	146657510	+	1339	-	- && Q5NUF3.1 RecName: Full=2-hydroxyisoflavanone dehydratase; AltName: Full=Carboxylesterase HIDH && PF07859:alpha/beta hydrolase fold	Abhydrolase_3
Niben261Chr13g0854005	1099.86	1061.1	1003.47	1512.14	1676.36	1351.84	1054.81	1513.44	-0.520475	3.76035e-09	1.4973e-07	Niben261Chr13g0854005	Niben261Chr13	85447560	85451507	+	1695	protein_coding	- && sp|Q940G0|TMN1_ARATH Transmembrane 9 superfamily member 1 OS=Arabidopsis thaliana OX=3702 GN=TMN1 PE=1 SV=1 && PF02990:Endomembrane protein 70	-
Niben261Chr15g0636003	2561.63	2584.56	2875.17	1963.94	1973.62	2081.37	2673.78	2006.31	0.41424	3.8033e-09	1.51288e-07	Niben261Chr15g0636003	Niben261Chr15	63673041	63677650	+	2424	protein_coding	- && sp|Q8L7V3|PMTQ_ARATH Probable methyltransferase PMT26 OS=Arabidopsis thaliana OX=3702 GN=At5g64030 PE=2 SV=1 && PF03141:Putative S-adenosyl-L-methionine-dependent methyltransferase	-
Niben261Chr06g0695012	2035.73	2056.78	1939.83	1396.04	1459.02	1599.8	2010.78	1484.95	0.437229	3.87004e-09	1.53788e-07	Niben261Chr06g0695012	Niben261Chr06	69496763	69504834	+	2943	protein_coding	- && sp|Q60560|SMBP2_MESAU DNA-binding protein SMUBP-2 OS=Mesocricetus auratus OX=10036 GN=IGHMBP2 PE=1 SV=1 && PF13086:AAA domain|PF13087:AAA domain	-
novel.4662	0	0	0	29.9912	38.9851	26.8069	0	31.9278	-7.40262	3.96117e-09	1.57252e-07	-	Niben261Chr13	88827101	88827995	+	801	-	- && - && -	-
Niben261Chr19g1427018	27.3315	37.6984	25.8094	86.1038	99.412	90.9521	30.2798	92.156	-1.61219	4.07089e-09	1.61446e-07	Niben261Chr19g1427018	Niben261Chr19	142706846	142708905	-	1341	protein_coding	- && - && PF03398:Regulator of Vps4 activity in the MVB pathway	-
Niben261Chr10g0166014	723.815	588.76	647.3	393.756	433.709	437.528	653.292	421.664	0.633197	4.13141e-09	1.63682e-07	Niben261Chr10g0166014	Niben261Chr10	16658821	16661033	-	1833	protein_coding	- && - && -	-
Niben261Chr09g0251005	406.203	414.682	409.853	656.904	574.056	633.793	410.246	621.584	-0.599793	4.13787e-09	1.63774e-07	Niben261Chr09g0251005	Niben261Chr09	25116890	25127013	+	1656	protein_coding	- && sp|Q94AR8|LEUC_ARATH 3-isopropylmalate dehydratase large subunit, chloroplastic OS=Arabidopsis thaliana OX=3702 GN=IIL1 PE=1 SV=1 && PF00330:Aconitase family (aconitate hydratase)	Aconitase
Niben261Chr17g1088002	936.812	559.932	421.209	2857.87	3807.87	2604.1	639.318	3089.95	-2.27262	4.14297e-09	1.63813e-07	Niben261Chr17g1088002	Niben261Chr17	108799322	108801477	+	800	protein_coding	- && sp|P07979|GUB_NICPL Lichenase OS=Nicotiana plumbaginifolia OX=4092 GN=GN1 PE=2 SV=3 && PF00332:Glycosyl hydrolases family 17	Glyco_hydro_17
Niben261Chr18g1309013	230.904	218.429	200.281	96.7458	127.676	97.6539	216.538	107.359	1.01324	4.14784e-09	1.63842e-07	Niben261Chr18g1309013	Niben261Chr18	130960319	130963911	-	1398	protein_coding	- && sp|Q9LJK2|ABAH4_ARATH Abscisic acid 8'-hydroxylase 4 OS=Arabidopsis thaliana OX=3702 GN=CYP707A4 PE=2 SV=2 && PF00067:Cytochrome P450	p450
Niben261Chr15g0466010	73.5124	43.2423	45.4246	134.477	142.296	139.779	54.0597	138.85	-1.35126	4.19056e-09	1.65364e-07	Niben261Chr15g0466010	Niben261Chr15	46621763	46626191	-	1152	protein_coding	- && sp|P14232|TGA1A_TOBAC TGACG-sequence-specific DNA-binding protein TGA-1A OS=Nicotiana tabacum OX=4097 GN=TGA1A PE=1 SV=1 && PF14144:Seed dormancy control|PF00170:bZIP transcription factor	bZIP_1
Niben261Chr07g0739003	290.28	358.135	289.065	520.493	516.553	476.781	312.493	504.609	-0.693769	4.2323e-09	1.66845e-07	Niben261Chr07g0739003	Niben261Chr07	73888970	73891450	+	1134	protein_coding	- && sp|P48626|FAD3E_TOBAC Omega-3 fatty acid desaturase, endoplasmic reticulum OS=Nicotiana tabacum OX=4097 GN=FAD3 PE=2 SV=1 && PF11960:Domain of unknown function (DUF3474)|PF00487:Fatty acid desaturase	-
Niben261Chr09g1264010	584.33	562.149	598.778	950.044	927.846	759.211	581.752	879.034	-0.595063	4.2664e-09	1.68023e-07	Niben261Chr09g1264010	Niben261Chr09	126440694	126443356	-	576	protein_coding	- && sp|Q9FPJ5|LRR1_ARATH Leucine-rich repeat protein 1 OS=Arabidopsis thaliana OX=3702 GN=LRR1 PE=1 SV=1 && PF13855:Leucine rich repeat|PF08263:Leucine rich repeat N-terminal domain	LRRNT_2
Niben261Chr03g0589003	2303.39	2286.3	2256.77	1690.15	1640.3	1835.32	2282.15	1721.92	0.40634	4.39778e-09	1.73025e-07	Niben261Chr03g0589003	Niben261Chr03	58882327	58890178	-	1677	protein_coding	- && sp|Q0WWW9|XYLL3_ARATH D-xylose-proton symporter-like 3, chloroplastic OS=Arabidopsis thaliana OX=3702 GN=At5g59250 PE=1 SV=2 && PF00083:Sugar (and other) transporter	Sugar_tr
Niben261Chr16g1143002	684.231	680.789	620.458	1043.89	1139.34	857.822	661.826	1013.68	-0.614849	4.47412e-09	1.75747e-07	Niben261Chr16g1143002	Niben261Chr16	114360382	114362331	+	1617	protein_coding	- && sp|Q6IEQ7|WRK24_ORYSJ WRKY transcription factor WRKY24 OS=Oryza sativa subsp. japonica OX=39947 GN=WRKY24 PE=2 SV=1 && PF03106:WRKY DNA -binding domain	WRKY
Niben261Chr03g1794002	40.5261	52.1125	18.5828	130.607	120.854	99.5687	37.0738	117.01	-1.66211	4.47584e-09	1.75747e-07	Niben261Chr03g1794002	Niben261Chr03	179332609	179333973	-	1365	protein_coding	- && sp|F8WKW8|UGT9_GARJA Beta-D-glucosyl crocetin beta-1,6-glucosyltransferase OS=Gardenia jasminoides OX=114476 GN=UGT94E5 PE=1 SV=1 && PF00201:UDP-glucoronosyl and UDP-glucosyl transferase	UDPGT
novel.1416	39.5836	32.1545	21.6799	91.9085	107.209	89.9948	31.1393	96.3708	-1.62441	4.49087e-09	1.76162e-07	-	Niben261Chr04	167671743	167675963	+	4060	-	- && C0LGJ1.1 RecName: Full=Probable LRR receptor-like serine/threonine-protein kinase At1g74360; Flags: Precursor && PF13855:Leucine rich repeat|PF00069:Protein kinase domain	Pkinase
Niben261Chr11g1206005	58.433	53.2213	51.6188	148.021	174.458	103.398	54.4243	141.959	-1.38109	4.54281e-09	1.78023e-07	Niben261Chr11g1206005	Niben261Chr11	120679305	120680501	+	852	protein_coding	- && sp|K4BNG7|NAP2_SOLLC NAC domain-containing protein 2 OS=Solanum lycopersicum OX=4081 GN=NAP2 PE=2 SV=1 && PF02365:No apical meristem (NAM) protein	NAM
Niben261Chr09g0002013	1461.77	1203.02	1210.98	2311.26	3680.19	3121.09	1291.92	3037.52	-1.23317	4.56036e-09	1.78534e-07	Niben261Chr09g0002013	Niben261Chr09	262484	265913	+	2439	protein_coding	- && - && PF01190:Pollen proteins Ole e I like	-
Niben261Chr07g0342014	2856.62	2922.73	3016.6	2284.17	2223.13	2316.89	2931.98	2274.73	0.366034	4.56927e-09	1.78707e-07	Niben261Chr07g0342014	Niben261Chr07	34283302	34285759	+	969	protein_coding	- && sp|Q94BS2|MET1_ARATH Protein MET1, chloroplastic OS=Arabidopsis thaliana OX=3702 GN=MET1 PE=1 SV=1 && -	-
Niben261Chr19g1159014	4617.15	4465.04	4573.43	3699.56	3526.2	3582.56	4551.87	3602.77	0.337469	4.6117e-09	1.80188e-07	Niben261Chr19g1159014	Niben261Chr19	115959480	115962663	-	1053	protein_coding	- && sp|P23525|IN37_SPIOL 2-methyl-6-phytyl-1,4-hydroquinone methyltransferase, chloroplastic OS=Spinacia oleracea OX=3562 PE=1 SV=1 && PF13489:Methyltransferase domain	-
Niben261Chr12g0047007	87.6494	65.4178	100.14	202.199	227.088	153.183	84.4026	194.157	-1.19814	4.6506e-09	1.8147e-07	Niben261Chr12g0047007	Niben261Chr12	4700609	4701508	-	372	protein_coding	- && - && -	-
Niben261Chr02g0170012	226.192	250.583	211.637	397.625	409.344	352.32	229.471	386.43	-0.753071	4.65365e-09	1.8147e-07	Niben261Chr02g0170012	Niben261Chr02	17054679	17058239	-	1374	protein_coding	- && sp|Q9FJF5|SOK5_ARATH Protein SOSEKI 5 OS=Arabidopsis thaliana OX=3702 GN=SOK5 PE=1 SV=1 && PF06136:Domain of unknown function (DUF966)	-
Niben261Chr11g1057002	789.787	811.624	791.833	536.939	556.512	572.52	797.748	555.324	0.522317	4.66434e-09	1.81708e-07	Niben261Chr11g1057002	Niben261Chr11	105752728	105759647	+	795	protein_coding	- && sp|Q94AQ9|SGRL_ARATH Magnesium dechelatase SGRL, chloroplastic OS=Arabidopsis thaliana OX=3702 GN=SGRL PE=1 SV=1 && PF12638:Staygreen protein	-
novel.3917	616.373	559.932	485.217	849.428	790.423	872.183	553.841	837.345	-0.595358	4.6843e-09	1.82306e-07	-	Niben261Chr11	55547993	55552721	+	4631	-	- && - && -	-
Niben261Chr12g0325017	195.091	166.316	128.015	319.261	383.029	270.942	163.141	324.411	-0.989283	4.70698e-09	1.83009e-07	Niben261Chr12g0325017	Niben261Chr12	32508786	32511200	-	1497	protein_coding	- && sp|P17801|KPRO_MAIZE Putative receptor protein kinase ZmPK1 OS=Zea mays OX=4577 GN=PK1 PE=2 SV=2 && PF14295:PAN domain|PF01453:D-mannose binding lectin	B_lectin
Niben261Chr08g0196014	1425.95	1582.22	1695.16	1114.51	879.114	1143.12	1567.78	1045.58	0.583895	4.72566e-09	1.83555e-07	Niben261Chr08g0196014	Niben261Chr08	19676313	19676949	+	543	protein_coding	- && - && PF06549:Protein of unknown function (DUF1118)	-
Niben261Chr11g1334016	1848.18	1675.36	1582.63	2331.57	2388.81	2209.66	1702.06	2310.02	-0.439978	4.83232e-09	1.87514e-07	Niben261Chr11g1334016	Niben261Chr11	133427061	133463946	+	6594	protein_coding	- && sp|F4I171|MD15A_ARATH Mediator of RNA polymerase II transcription subunit 15a OS=Arabidopsis thaliana OX=3702 GN=MED15A PE=1 SV=1 && PF16987:KIX domain|PF02365:No apical meristem (NAM) protein|PF01485:IBR domain, a half RING-finger domain	NAM
Niben261Chr08g1105004	2113.01	2513.6	2440.54	1423.13	1360.58	1860.21	2355.71	1547.97	0.605282	4.8647e-09	1.88586e-07	Niben261Chr08g1105004	Niben261Chr08	110555915	110556953	+	888	protein_coding	- && sp|Q9S728|PDF1_ARATH Protodermal factor 1 OS=Arabidopsis thaliana OX=3702 GN=PDF1 PE=2 SV=1 && -	-
Niben261Chr16g0496002	1.88493	0	1.03238	37.7309	50.6806	37.3382	0.972437	41.9166	-5.36196	4.99208e-09	1.93335e-07	Niben261Chr16g0496002	Niben261Chr16	49558889	49569102	-	984	protein_coding	- && sp|Q9FJJ4|FB298_ARATH F-box protein At5g62510 OS=Arabidopsis thaliana OX=3702 GN=At5g62510 PE=2 SV=1 && PF00646:F-box domain	F-box
Niben261Chr02g0470002	1612.56	1637.66	1613.6	1223.83	1233.88	1209.18	1621.28	1222.3	0.407443	5.08313e-09	1.96668e-07	Niben261Chr02g0470002	Niben261Chr02	47072101	47078115	+	1455	protein_coding	- && sp|E0CTY1|GATA_VITVI Glutamyl-tRNA(Gln) amidotransferase subunit A, chloroplastic/mitochondrial OS=Vitis vinifera OX=29760 GN=GATA PE=3 SV=1 && PF01425:Amidase	Amidase
Niben261Chr12g0429008	274.258	252.801	207.508	693.668	865.469	505.502	244.855	688.213	-1.49051	5.11354e-09	1.97652e-07	Niben261Chr12g0429008	Niben261Chr12	42894519	42896157	-	963	protein_coding	- && sp|K4BIZ9|WRK70_SOLLC WRKY DNA-binding transcription factor 70 OS=Solanum lycopersicum OX=4081 GN=WRKY70 PE=2 SV=1 && PF03106:WRKY DNA -binding domain	WRKY
Niben261Chr15g1414001	100.844	69.8529	73.2987	204.134	173.484	165.629	81.3319	181.082	-1.14859	5.14289e-09	1.98593e-07	Niben261Chr15g1414001	Niben261Chr15	141426431	141434988	-	1602	protein_coding	- && sp|Q94KB7|MLO6_ARATH MLO-like protein 6 OS=Arabidopsis thaliana OX=3702 GN=MLO6 PE=2 SV=2 && PF03094:Mlo family	-
Niben261Chr07g0103004	663.497	702.964	726.793	464.38	462.948	492.099	697.751	473.142	0.559806	5.15739e-09	1.98959e-07	Niben261Chr07g0103004	Niben261Chr07	10269926	10289152	-	1809	protein_coding	- && sp|Q9LV77|ASNS2_ARATH Asparagine synthetase [glutamine-hydrolyzing] 2 OS=Arabidopsis thaliana OX=3702 GN=ASN2 PE=2 SV=1 && PF00733:Asparagine synthase|PF13537:Glutamine amidotransferase domain	-
novel.1835	27.3315	25.5019	36.1332	0	0	0	29.6555	0	7.38244	5.16654e-09	1.99118e-07	-	Niben261Chr05	14537612	14538765	-	1154	-	- && - && -	-
Niben261Chr19g1449003	16.9644	31.0457	27.8742	72.5594	92.5896	89.0374	25.2948	84.7288	-1.75542	5.26352e-09	2.02658e-07	Niben261Chr19g1449003	Niben261Chr19	144949034	144958254	+	1563	protein_coding	- && - && PF14380:Wall-associated receptor kinase C-terminal	-
Niben261Chr11g0071002	206.4	176.295	225.058	357.96	336.247	352.32	202.585	348.842	-0.782182	5.31159e-09	2.0431e-07	Niben261Chr11g0071002	Niben261Chr11	7169080	7171389	+	1155	protein_coding	- && sp|O49447|ADT3_ARATH ADP,ATP carrier protein 3, mitochondrial OS=Arabidopsis thaliana OX=3702 GN=AAC3 PE=1 SV=1 && PF00153:Mitochondrial carrier protein	Mito_carr
Niben261Chr14g1008002	21678.6	21095.6	20538.1	15493.8	14625.3	17713.6	21104.1	15944.3	0.404488	5.48657e-09	2.10837e-07	Niben261Chr14g1008002	Niben261Chr14	100785329	100792387	+	2421	protein_coding	- && sp|O49954|GCSP_SOLTU Glycine dehydrogenase (decarboxylating), mitochondrial OS=Solanum tuberosum OX=4113 GN=GDCSP PE=2 SV=1 && PF02347:Glycine cleavage system P-protein	-
novel.6471	2058.35	2215.33	2342.46	1744.33	1558.43	1465.77	2205.38	1589.51	0.47219	5.51129e-09	2.11581e-07	-	Niben261Chr18	90494442	90496787	+	471	-	- && - && -	-
novel.5198	1098.92	1062.21	1019.99	800.088	749.489	696.981	1060.37	748.852	0.502176	5.58613e-09	2.14247e-07	-	Niben261Chr14	76655396	76658488	-	2597	-	- && Q9XEE6.1 RecName: Full=Zinc finger CCCH domain-containing protein 29; Short=AtC3H29; AltName: Full=AtSZF2 && -	-
novel.4462	373.217	303.805	331.393	494.371	635.457	532.309	336.138	554.046	-0.718702	5.61041e-09	2.1497e-07	-	Niben261Chr12	61402056	61403891	-	1651	-	- && - && PF08241:Methyltransferase domain	Methyltransf_11
Niben261Chr01g0442006	3200.62	3266.45	3081.64	2477.66	2185.12	2516.98	3182.91	2393.25	0.411245	5.74239e-09	2.19814e-07	Niben261Chr01g0442006	Niben261Chr01	44198545	44207647	+	1608	protein_coding	- && sp|Q8S9L5|TIG_ARATH Trigger factor-like protein TIG, Chloroplastic OS=Arabidopsis thaliana OX=3702 GN=TIG PE=1 SV=1 && PF05697:Bacterial trigger factor protein (TF)|PF05698:Bacterial trigger factor protein (TF) C-terminus	-
Niben261Chr08g0067004	11047.6	11380.5	11586.4	9401.76	9066.96	8866.4	11338.1	9111.71	0.315345	5.74926e-09	2.19865e-07	Niben261Chr08g0067004	Niben261Chr08	6711892	6713111	-	324	protein_coding	- && sp|Q9SUI6|PSAH2_ARATH Photosystem I reaction center subunit VI-2, chloroplastic OS=Arabidopsis thaliana OX=3702 GN=PSAH2 PE=2 SV=1 && PF03244:Photosystem I reaction centre subunit VI	-
Niben261Chr04g1115024	1752.05	1684.23	1818.01	1367.02	1269.94	1284.82	1751.43	1307.26	0.422202	5.76537e-09	2.20268e-07	Niben261Chr04g1115024	Niben261Chr04	111549272	111551017	-	831	protein_coding	- && sp|Q08935|ROC1_NICSY 29 kDa ribonucleoprotein A, chloroplastic OS=Nicotiana sylvestris OX=4096 PE=2 SV=1 && PF00076:RNA recognition motif. (a.k.a. RRM, RBD, or RNP domain)	RRM_1
Niben261Chr14g1218001	387.354	337.068	372.688	524.362	619.863	571.562	365.703	571.929	-0.64352	5.81537e-09	2.21964e-07	Niben261Chr14g1218001	Niben261Chr14	121810036	121813699	-	1365	protein_coding	- && - && PF13369:Transglutaminase-like superfamily|PF13371:Tetratricopeptide repeat	-
Niben261Chr17g0693013	74992.1	70168.9	71963.8	60657.7	57271.1	56582.8	72374.9	58170.5	0.31522	5.96505e-09	2.27458e-07	Niben261Chr17g0693013	Niben261Chr17	69290651	69291567	+	543	protein_coding	- && sp|A0A0S4IJL0|RBS_NICBE Ribulose bisphosphate carboxylase small subunit, chloroplastic OS=Nicotiana benthamiana OX=4100 GN=rbcS PE=1 SV=1 && PF12338:Ribulose-1,5-bisphosphate carboxylase small subunit|PF00101:Ribulose bisphosphate carboxylase, small chain	-
Niben261Chr05g0624004	46.1809	49.8949	46.4569	116.095	135.473	108.185	47.5109	119.918	-1.33689	6.27167e-09	2.3892e-07	Niben261Chr05g0624004	Niben261Chr05	62349323	62352241	-	726	protein_coding	- && - && -	-
Niben261Chr12g1441001	161.162	153.011	186.86	355.057	306.033	265.197	167.011	308.763	-0.885944	6.28645e-09	2.39253e-07	Niben261Chr12g1441001	Niben261Chr12	144162289	144167006	+	525	protein_coding	- && sp|Q9SMQ4|SRK2F_ARATH Serine/threonine-protein kinase SRK2F OS=Arabidopsis thaliana OX=3702 GN=SRK2F PE=1 SV=1 && -	-
Niben261Chr08g1338011	23.5617	28.8282	21.6799	83.2014	103.311	65.1026	24.6899	83.8715	-1.76777	6.42094e-09	2.44138e-07	Niben261Chr08g1338011	Niben261Chr08	133678270	133680869	+	1185	protein_coding	- && sp|Q9ZUF4|RIPK_ARATH Serine/threonine-protein kinase RIPK OS=Arabidopsis thaliana OX=3702 GN=RIPK PE=1 SV=1 && PF00069:Protein kinase domain	Pkinase
novel.3248	996.188	934.698	1245.05	603.694	633.508	764.955	1058.64	667.386	0.665661	6.45372e-09	2.45148e-07	-	Niben261Chr09	126585774	126588647	+	964	-	- && - && -	-
Niben261Chr12g0046010	256.351	237.278	178.601	407.3	421.039	360.936	224.077	396.425	-0.82171	6.4802e-09	2.45834e-07	Niben261Chr12g0046010	Niben261Chr12	4607252	4616755	-	1167	protein_coding	- && sp|P29602|CPC_CUCSA Cucumber peeling cupredoxin OS=Cucumis sativus OX=3659 PE=1 SV=3 && PF02298:Plastocyanin-like domain	Cu_bind_like
Niben261Chr15g0178008	6130.75	5831.05	5743.11	4655.41	4559.31	4806.1	5901.64	4673.61	0.336709	6.48418e-09	2.45834e-07	Niben261Chr15g0178008	Niben261Chr15	17796436	17802969	+	1995	protein_coding	- && sp|Q40412|ABA2_NICPL Zeaxanthin epoxidase, chloroplastic OS=Nicotiana plumbaginifolia OX=4092 GN=ABA2 PE=1 SV=1 && PF00498:FHA domain|PF01494:FAD binding domain	FHA
Niben261Chr18g1466002	991.475	971.288	878.552	1289.62	1270.91	1391.09	947.105	1317.21	-0.475712	6.64512e-09	2.51695e-07	Niben261Chr18g1466002	Niben261Chr18	146619922	146625967	-	2910	protein_coding	- && sp|P42762|CLPD_ARATH Chaperone protein ClpD, chloroplastic OS=Arabidopsis thaliana OX=3702 GN=CLPD PE=1 SV=1 && PF10431:C-terminal, D2-small domain, of ClpB protein|PF00004:ATPase family associated with various cellular activities (AAA)|PF17871:AAA lid domain|PF07724:AAA domain (Cdc48 subfamily)|PF02861:Clp amino terminal domain, pathogenicity island component	Clp_N
Niben261Chr11g0095006	138.543	115.313	80.5253	223.483	280.693	215.413	111.46	239.863	-1.10252	7.00173e-09	2.64949e-07	Niben261Chr11g0095006	Niben261Chr11	9555002	9555730	-	729	protein_coding	- && sp|Q6R567|RMA1_CAPAN E3 ubiquitin-protein ligase RMA1H1 OS=Capsicum annuum OX=4072 GN=RMA1H1 PE=1 SV=1 && PF00097:Zinc finger, C3HC4 type (RING finger)	zf-C3HC4
Niben261Chr11g1152005	3098.83	3128.97	3062.03	2351.89	2208.51	2523.68	3096.61	2361.36	0.390965	7.04089e-09	2.66176e-07	Niben261Chr11g1152005	Niben261Chr11	115239126	115246011	-	1662	protein_coding	- && sp|Q5Z5A8|P2SAF_ORYSJ Photosystem II stability/assembly factor HCF136, chloroplastic OS=Oryza sativa subsp. japonica OX=39947 GN=HCF136 PE=3 SV=1 && PF14870:Photosynthesis system II assembly factor YCF48	-
Niben261Chr04g1630003	49.9507	57.6564	40.2627	129.639	134.499	109.143	49.2899	124.427	-1.33815	7.11934e-09	2.68886e-07	Niben261Chr04g1630003	Niben261Chr04	163049768	163055109	+	939	protein_coding	- && sp|Q8GYN5|RIN4_ARATH RPM1-interacting protein 4 OS=Arabidopsis thaliana OX=3702 GN=RIN4 PE=1 SV=1 && PF05627:Cleavage site for pathogenic type III effector avirulence factor Avr	-
Niben261Chr08g0214024	87.6494	63.2002	71.234	159.631	197.849	147.438	74.0279	168.306	-1.17938	7.50064e-09	2.83017e-07	Niben261Chr08g0214024	Niben261Chr08	21403186	21404738	+	906	protein_coding	- && sp|Q9M6A3|ASC1_SOLLC Alternaria stem canker resistance protein 1 OS=Solanum lycopersicum OX=4081 GN=Asc-1 PE=2 SV=3 && PF03798:TLC domain	LAG1
Niben261Chr17g0440001	373.217	383.637	462.505	659.807	633.508	596.455	406.453	629.923	-0.632465	7.58697e-09	2.86002e-07	Niben261Chr17g0440001	Niben261Chr17	44044926	44053680	-	2220	protein_coding	- && sp|Q93ZQ5|SPXM3_ARATH SPX domain-containing membrane protein At4g22990 OS=Arabidopsis thaliana OX=3702 GN=At4g22990 PE=2 SV=2 && PF07690:Major Facilitator Superfamily|PF03105:SPX domain	MFS_1
Niben261Chr12g0785020	943.409	909.196	787.703	572.735	642.28	562.946	880.103	592.654	0.570932	7.69308e-09	2.89726e-07	Niben261Chr12g0785020	Niben261Chr12	78466102	78472413	-	3276	protein_coding	- && sp|Q8RYC8|ARFS_ARATH Auxin response factor 19 OS=Arabidopsis thaliana OX=3702 GN=ARF19 PE=1 SV=2 && PF02309:AUX/IAA family|PF02362:B3 DNA binding domain|PF06507:Auxin response factor	Auxin_resp
Niben261Chr13g0909005	229.019	232.843	278.742	473.087	381.079	402.104	246.868	418.757	-0.762748	7.7796e-09	2.92706e-07	Niben261Chr13g0909005	Niben261Chr13	90919571	90921203	+	1524	protein_coding	- && sp|A6YIH8|C7D55_HYOMU Premnaspirodiene oxygenase OS=Hyoscyamus muticus OX=35626 GN=CYP71D55 PE=1 SV=1 && PF00067:Cytochrome P450	p450
Niben261Chr10g0516003	1168.66	1089.93	1192.39	1900.09	1840.1	1410.24	1150.33	1716.81	-0.577285	7.83983e-09	2.94693e-07	Niben261Chr10g0516003	Niben261Chr10	51621685	51622060	-	243	protein_coding	- && - && -	-
novel.3835	651.245	598.739	586.39	437.291	394.724	371.468	612.124	401.161	0.610497	7.85601e-09	2.95021e-07	-	Niben261Chr10	121465613	121469194	-	3503	-	- && Q9SGD6.1 RecName: Full=Arogenate dehydratase/prephenate dehydratase 6, chloroplastic; Short=AtADT6; Short=AtPDT6; Flags: Precursor && PF00800:Prephenate dehydratase	-
Niben261Chr18g1342001	187.551	159.664	126.982	323.131	279.718	287.217	158.066	296.689	-0.905858	7.91707e-09	2.97033e-07	Niben261Chr18g1342001	Niben261Chr18	134197768	134203994	-	534	protein_coding	- && - && PF00582:Universal stress protein family	Usp
Niben261Chr14g1262002	104.614	141.923	122.853	279.595	221.24	225.944	123.13	242.26	-0.980663	8.08088e-09	3.02892e-07	Niben261Chr14g1262002	Niben261Chr14	126260982	126263956	-	1041	protein_coding	- && sp|Q00763|COMT1_POPTM Caffeic acid 3-O-methyltransferase 1 OS=Populus tremuloides OX=3693 GN=OMT1 PE=1 SV=1 && PF08100:Dimerisation domain|PF00891:O-methyltransferase domain	-
Niben261Chr06g1470007	2501.31	2352.82	2371.37	1885.58	1781.62	1875.53	2408.5	1847.57	0.382803	8.15658e-09	3.0544e-07	Niben261Chr06g1470007	Niben261Chr06	147029033	147034393	-	1647	protein_coding	- && sp|Q38885|SCY1_ARATH Preprotein translocase subunit SCY1, chloroplastic OS=Arabidopsis thaliana OX=3702 GN=SCY1 PE=1 SV=2 && PF00344:SecY translocase	-
Niben261Chr16g0696003	368.505	386.963	339.652	566.931	541.893	558.159	365.04	555.661	-0.606732	8.17912e-09	3.05995e-07	Niben261Chr16g0696003	Niben261Chr16	69617070	69624016	-	1425	protein_coding	- && sp|O24160|TGA21_TOBAC TGACG-sequence-specific DNA-binding protein TGA-2.1 OS=Nicotiana tabacum OX=4097 GN=TGA21 PE=1 SV=1 && PF00170:bZIP transcription factor|PF14144:Seed dormancy control	bZIP_1
Niben261Chr12g0680005	282.74	259.454	247.77	408.267	451.253	415.508	263.321	425.009	-0.689296	8.38303e-09	3.13328e-07	Niben261Chr12g0680005	Niben261Chr12	68021377	68024681	+	1699	protein_coding	- && sp|O04719|P2C77_ARATH Protein phosphatase 2C 77 OS=Arabidopsis thaliana OX=3702 GN=ABI2 PE=1 SV=1 && PF00481:Protein phosphatase 2C	PP2C
Niben261Chr07g0124001	77.2823	75.3968	52.6512	153.826	226.114	134.035	68.4434	171.325	-1.32265	8.80094e-09	3.28638e-07	Niben261Chr07g0124001	Niben261Chr07	12481468	12483709	+	1629	protein_coding	- && sp|P24792|ASO_CUCMA L-ascorbate oxidase OS=Cucurbita maxima OX=3661 GN=AAO PE=1 SV=2 && PF07732:Multicopper oxidase|PF00394:Multicopper oxidase|PF07731:Multicopper oxidase	-
Niben261Chr07g1417015	4273.15	3935.05	3756.82	5384.87	5298.08	4939.18	3988.34	5207.38	-0.384475	9.04566e-09	3.37458e-07	Niben261Chr07g1417015	Niben261Chr07	141746284	141747782	+	855	protein_coding	- && sp|Q96471|DCAM_IPONI S-adenosylmethionine decarboxylase proenzyme OS=Ipomoea nil OX=35883 GN=SAMDC PE=3 SV=1 && PF01536:Adenosylmethionine decarboxylase|PF08132:S-adenosyl-l-methionine decarboxylase leader peptide	SAM_decarbox
Niben261Chr09g1354018	6667.01	6663.74	6904.53	8417.86	8179.08	9173.72	6745.1	8590.22	-0.348881	9.26376e-09	3.45269e-07	Niben261Chr09g1354018	Niben261Chr09	135443222	135443740	+	519	protein_coding	- && sp|P21568|CYPH_SOLLC Peptidyl-prolyl cis-trans isomerase OS=Solanum lycopersicum OX=4081 GN=CYP PE=2 SV=1 && PF00160:Cyclophilin type peptidyl-prolyl cis-trans isomerase/CLD	Pro_isomerase
Niben261Chr13g0113045	3591.74	3645.66	3611.25	2875.29	2724.08	2923.87	3616.22	2841.08	0.347941	9.32202e-09	3.47114e-07	Niben261Chr13g0113045	Niben261Chr13	11218337	11228828	-	1647	protein_coding	- && sp|Q70G58|NTRC_ORYSJ Thioredoxin reductase NTRC OS=Oryza sativa subsp. japonica OX=39947 GN=Os07g0657900 PE=1 SV=2 && PF00085:Thioredoxin|PF07992:Pyridine nucleotide-disulphide oxidoreductase	Pyr_redox_2
Niben261Chr07g0376001	119.693	110.878	110.464	214.776	227.088	207.754	113.678	216.539	-0.928223	9.46612e-09	3.52149e-07	Niben261Chr07g0376001	Niben261Chr07	37622380	37623987	+	1380	protein_coding	- && - && PF13962:Domain of unknown function|PF12796:Ankyrin repeats (3 copies)	-
Niben261Chr04g1643004	5531.34	5094.83	5921.71	4093.32	4350.74	3466.71	5515.96	3970.26	0.474536	9.50138e-09	3.5295e-07	Niben261Chr04g1643004	Niben261Chr04	164373004	164375087	-	576	protein_coding	- && sp|Q9SUI4|PSAL_ARATH Photosystem I reaction center subunit XI, chloroplastic OS=Arabidopsis thaliana OX=3702 GN=PSAL PE=1 SV=2 && PF02605:Photosystem I reaction centre subunit XI	-
Niben261Chr14g0532003	309.129	293.826	224.026	486.632	444.43	452.846	275.66	461.303	-0.741983	9.50548e-09	3.5295e-07	Niben261Chr14g0532003	Niben261Chr14	53249016	53253102	+	1140	protein_coding	- && sp|Q8VYH6|B651B_ARATH Cytochrome b561 and DOMON domain-containing protein At4g17280 OS=Arabidopsis thaliana OX=3702 GN=At4g17280 PE=2 SV=1 && PF04526:Protein of unknown function (DUF568)	-
Niben261Chr03g0875003	27.3315	21.0667	19.6151	88.0387	91.615	59.3582	22.6711	79.6707	-1.80694	9.52464e-09	3.53309e-07	Niben261Chr03g0875003	Niben261Chr03	87493730	87499240	+	1032	protein_coding	- && sp|Q84TE6|NAC22_ARATH NAC domain-containing protein 21/22 OS=Arabidopsis thaliana OX=3702 GN=NAC021 PE=1 SV=2 && PF02365:No apical meristem (NAM) protein	NAM
Niben261Chr08g0323012	88.5919	90.9196	125.95	194.459	212.469	216.37	101.82	207.766	-1.02971	9.53298e-09	3.53309e-07	Niben261Chr08g0323012	Niben261Chr08	32376700	32381296	-	1335	protein_coding	- && sp|P54767|DCE_SOLLC Glutamate decarboxylase OS=Solanum lycopersicum OX=4081 PE=2 SV=1 && PF00282:Pyridoxal-dependent decarboxylase conserved domain	-
Niben261Chr16g0795013	895.344	933.589	881.649	646.262	606.218	664.429	903.527	638.97	0.499382	9.67686e-09	3.58306e-07	Niben261Chr16g0795013	Niben261Chr16	79541031	79546025	+	1533	protein_coding	- && sp|Q7Y1W1|TIC56_ARATH Protein TIC 56, chloroplastic OS=Arabidopsis thaliana OX=3702 GN=TIC56 PE=1 SV=1 && PF14237:GYF domain 2	-
Niben261Chr12g0390011	102.729	96.4635	88.7844	182.85	198.824	192.436	95.9923	191.37	-0.994084	9.93372e-09	3.67473e-07	Niben261Chr12g0390011	Niben261Chr12	38910444	38913572	-	3129	protein_coding	- && sp|Q9M9X0|RLP32_ARATH Receptor-like protein 32 OS=Arabidopsis thaliana OX=3702 GN=RLP32 PE=2 SV=1 && PF08263:Leucine rich repeat N-terminal domain|PF13855:Leucine rich repeat	LRRNT_2
Niben261Chr14g0059009	212.998	268.324	224.026	377.309	405.445	388.701	235.116	390.485	-0.734929	1.01336e-08	3.74518e-07	Niben261Chr14g0059009	Niben261Chr14	5917423	5922988	-	1401	protein_coding	- && sp|Q56YU0|AL2C4_ARATH Aldehyde dehydrogenase family 2 member C4 OS=Arabidopsis thaliana OX=3702 GN=ALDH2C4 PE=1 SV=2 && PF00171:Aldehyde dehydrogenase family	Aldedh
Niben261Chr12g0682002	832.198	683.006	774.282	219.613	212.469	94.7817	763.162	175.621	2.11979	1.02102e-08	3.76998e-07	Niben261Chr12g0682002	Niben261Chr12	68118674	68120155	-	1440	protein_coding	- && sp|Q9M2U3|ALPL_ARATH Protein ALP1-like OS=Arabidopsis thaliana OX=3702 GN=At3g55350 PE=2 SV=1 && PF13359:DDE superfamily endonuclease	-
Niben261Scf02183g0000003	150.795	167.425	215.767	65.7872	92.5896	79.4635	177.996	79.2801	1.16606	1.02207e-08	3.77034e-07	Niben261Scf02183g0000003	Niben261Scf02183	1402	3435	-	546	protein_coding	- && sp|P13088|AUX22_SOYBN Auxin-induced protein AUX22 OS=Glycine max OX=3847 GN=AUX22 PE=2 SV=1 && PF02309:AUX/IAA family	-
Niben261Chr11g0715012	16.0219	5.54388	3.09713	61.9173	44.8329	50.7417	8.22098	52.4973	-2.64382	1.03434e-08	3.81206e-07	Niben261Chr11g0715012	Niben261Chr11	71530182	71532140	-	1548	protein_coding	- && sp|Q9S735|PHT19_ARATH Probable inorganic phosphate transporter 1-9 OS=Arabidopsis thaliana OX=3702 GN=PHT1-9 PE=2 SV=1 && PF00083:Sugar (and other) transporter	Sugar_tr
Niben261Chr01g1045005	65.9727	38.8072	44.3922	123.835	136.448	122.546	49.724	127.61	-1.35005	1.04789e-08	3.85512e-07	Niben261Chr01g1045005	Niben261Chr01	104505982	104507332	-	756	protein_coding	- && - && -	-
Niben261Chr06g1307009	448.614	392.507	388.173	635.62	611.092	606.029	409.765	617.58	-0.590109	1.04797e-08	3.85512e-07	Niben261Chr06g1307009	Niben261Chr06	130717727	130727628	-	2202	protein_coding	- && sp|Q9SJ56|BLH1_ARATH BEL1-like homeodomain protein 1 OS=Arabidopsis thaliana OX=3702 GN=BLH1 PE=1 SV=1 && PF05920:Homeobox KN domain|PF07526:Associated with HOX	POX
Niben261Chr11g1401007	1008.44	1107.67	1085.03	768.162	793.347	651.026	1067.04	737.512	0.532473	1.05308e-08	3.87033e-07	Niben261Chr11g1401007	Niben261Chr11	140148455	140154496	+	495	protein_coding	- && sp|Q9FLU5|HIP9_ARATH Heavy metal-associated isoprenylated plant protein 9 OS=Arabidopsis thaliana OX=3702 GN=HIPP09 PE=2 SV=1 && -	-
Niben261Chr10g1098003	3174.23	3194.38	3076.48	4386.46	4148.99	3799.88	3148.36	4111.78	-0.385146	1.05969e-08	3.89099e-07	Niben261Chr10g1098003	Niben261Chr10	109861148	109863602	+	1683	protein_coding	- && - && -	-
Niben261Chr06g0494015	1131.9	1107.67	1151.1	1487.95	1562.33	1476.3	1130.22	1508.86	-0.416634	1.08218e-08	3.96989e-07	Niben261Chr06g0494015	Niben261Chr06	49414714	49421928	-	1395	protein_coding	- && sp|Q9SYG7|AL7B4_ARATH Aldehyde dehydrogenase family 7 member B4 OS=Arabidopsis thaliana OX=3702 GN=ALDH7B4 PE=2 SV=3 && PF00171:Aldehyde dehydrogenase family	Aldedh
Niben261Chr16g0373018	116.866	79.8319	75.3635	188.654	210.52	185.734	90.6871	194.969	-1.09787	1.09522e-08	4.014e-07	Niben261Chr16g0373018	Niben261Chr16	37376203	37379575	+	1023	protein_coding	- && sp|Q9LK32|Y3721_ARATH Uncharacterized protein At3g27210 OS=Arabidopsis thaliana OX=3702 GN=Y-2 PE=1 SV=1 && -	-
Niben261Chr18g1464003	1073.47	1064.43	1073.67	777.837	810.89	735.276	1070.52	774.668	0.466837	1.10603e-08	4.0499e-07	Niben261Chr18g1464003	Niben261Chr18	146438105	146454400	-	1227	protein_coding	- && sp|P93431|RCA_ORYSJ Ribulose bisphosphate carboxylase/oxygenase activase, chloroplastic OS=Oryza sativa subsp. japonica OX=39947 GN=RCA PE=1 SV=2 && PF00004:ATPase family associated with various cellular activities (AAA)	AAA
Niben261Chr19g0983002	2433.45	2414.91	2165.93	3755.67	3758.16	2794.62	2338.1	3436.15	-0.555372	1.12142e-08	4.10246e-07	Niben261Chr19g0983002	Niben261Chr19	98276919	98287448	-	1149	protein_coding	- && - && -	-
Niben261Chr17g0397007	195.091	228.408	227.123	380.211	379.13	333.172	216.874	364.171	-0.749809	1.12911e-08	4.12676e-07	Niben261Chr17g0397007	Niben261Chr17	39734506	39736954	+	1095	protein_coding	- && sp|Q39237|TGA1_ARATH Transcription factor TGA1 OS=Arabidopsis thaliana OX=3702 GN=TGA1 PE=1 SV=2 && PF00170:bZIP transcription factor|PF14144:Seed dormancy control	bZIP_1
Niben261Chr16g0416018	497.623	500.058	454.246	267.019	346.967	276.686	483.975	296.891	0.705275	1.1334e-08	4.13865e-07	Niben261Chr16g0416018	Niben261Chr16	41665317	41669893	+	1203	protein_coding	- && sp|Q8H0T6|PPT2_ARATH Phosphoenolpyruvate/phosphate translocator 2, chloroplastic OS=Arabidopsis thaliana OX=3702 GN=PPT2 PE=2 SV=1 && PF03151:Triose-phosphate Transporter family	-
Niben261Chr09g0225004	887.804	851.54	856.872	1146.44	1160.78	1294.39	865.405	1200.54	-0.471932	1.14652e-08	4.1827e-07	Niben261Chr09g0225004	Niben261Chr09	22543646	22546746	-	1692	protein_coding	- && sp|Q9LIR6|BAM1_ARATH Beta-amylase 1, chloroplastic OS=Arabidopsis thaliana OX=3702 GN=BAM1 PE=1 SV=1 && PF01373:Glycosyl hydrolase family 14	-
Niben261Chr03g0102006	285.567	316.001	309.713	530.167	558.462	416.465	303.761	501.698	-0.724754	1.1621e-08	4.23561e-07	Niben261Chr03g0102006	Niben261Chr03	10193505	10214515	-	2019	protein_coding	- && - && -	-
Niben261Chr01g0151009	173.414	208.45	152.792	357.96	291.414	314.024	178.219	321.133	-0.851904	1.1723e-08	4.26888e-07	Niben261Chr01g0151009	Niben261Chr01	15105680	15107413	+	609	protein_coding	- && - && PF00011:Hsp20/alpha crystallin family	-
Niben261Chr11g0689017	56.548	69.8529	38.1979	157.696	117.93	140.736	54.8663	138.787	-1.34233	1.19282e-08	4.33962e-07	Niben261Chr11g0689017	Niben261Chr11	68942988	68946255	-	1536	protein_coding	- && sp|Q9SX98|LHTL8_ARATH Lysine histidine transporter-like 8 OS=Arabidopsis thaliana OX=3702 GN=AATL1 PE=1 SV=1 && PF01490:Transmembrane amino acid transporter protein	Aa_trans
Niben261Chr09g1123008	520.242	508.928	507.929	832.982	808.941	669.216	512.366	770.38	-0.588027	1.19553e-08	4.34549e-07	Niben261Chr09g1123008	Niben261Chr09	112377234	112379105	-	615	protein_coding	- && sp|O03982|HIP39_ARATH Heavy metal-associated isoprenylated plant protein 39 OS=Arabidopsis thaliana OX=3702 GN=HIPP39 PE=2 SV=1 && -	-
Niben261Chr18g0403007	183.781	201.797	193.054	409.235	355.739	281.473	192.878	348.816	-0.855696	1.21256e-08	4.40333e-07	Niben261Chr18g0403007	Niben261Chr18	40367796	40371354	-	708	protein_coding	- && sp|Q8GYX2|FLZ14_ARATH FCS-Like Zinc finger 14 OS=Arabidopsis thaliana OX=3702 GN=FLZ14 PE=1 SV=1 && PF04570:zinc-finger of the FCS-type, C2-C2	-
Niben261Chr13g0275002	344.943	354.808	338.619	201.231	191.027	227.859	346.124	206.706	0.743162	1.22216e-08	4.43413e-07	Niben261Chr13g0275002	Niben261Chr13	27577147	27580532	-	1845	protein_coding	- && sp|Q0WQ41|IP5P7_ARATH Type IV inositol polyphosphate 5-phosphatase 7 OS=Arabidopsis thaliana OX=3702 GN=IP5P7 PE=1 SV=1 && -	-
novel.2985	128.176	102.007	101.173	37.7309	51.6553	33.5087	110.452	40.9649	1.43408	1.22947e-08	4.45657e-07	-	Niben261Chr08	29203565	29205468	-	984	-	- && - && -	-
Niben261Chr03g0036002	74.4549	53.2213	60.9102	16.4468	19.4926	9.57391	62.8621	15.1711	2.05551	1.23167e-08	4.46047e-07	Niben261Chr03g0036002	Niben261Chr03	3633676	3634446	-	771	protein_coding	- && - && -	-
Niben261Chr09g1128005	486.313	452.381	472.828	725.594	685.163	657.728	470.507	689.495	-0.550422	1.23599e-08	4.47201e-07	Niben261Chr09g1128005	Niben261Chr09	112850860	112858325	-	1122	protein_coding	- && sp|Q40353|MMK2_MEDSA Mitogen-activated protein kinase homolog MMK2 OS=Medicago sativa OX=3879 GN=MMK2 PE=2 SV=1 && PF00069:Protein kinase domain	Pkinase
Niben261Chr18g1375009	48.0658	27.7194	27.8742	82.234	133.524	105.313	34.5531	107.024	-1.62064	1.2395e-08	4.48064e-07	Niben261Chr18g1375009	Niben261Chr18	137574775	137576290	-	1002	protein_coding	- && sp|P29059|CHI3_TOBAC Endochitinase 3 OS=Nicotiana tabacum OX=4097 GN=CHN14 PE=3 SV=1 && PF00187:Chitin recognition protein|PF00182:Chitinase class I	-
Niben261Chr03g1066001	720.045	646.416	685.498	467.282	421.039	490.184	683.986	459.502	0.574614	1.24544e-08	4.49799e-07	Niben261Chr03g1066001	Niben261Chr03	106628195	106632188	-	2931	protein_coding	- && sp|Q0WR59|Y5020_ARATH Probable inactive receptor kinase At5g10020 OS=Arabidopsis thaliana OX=3702 GN=At5g10020 PE=1 SV=2 && PF07714:Protein tyrosine kinase|PF08263:Leucine rich repeat N-terminal domain|PF13855:Leucine rich repeat	Pkinase_Tyr
novel.731	2279.83	2182.07	2260.9	2970.1	3021.35	2740.05	2240.93	2910.5	-0.376883	1.27877e-08	4.61416e-07	-	Niben261Chr02	111215679	111218124	-	1717	-	- && P0CG85.1 RecName: Full=Polyubiquitin; Contains: RecName: Full=Ubiquitin; Flags: Precursor >Q8H159.2 RecName: Full=Polyubiquitin 10; Contains: RecName: Full=Ubiquitin; Flags: Precursor && PF00240:Ubiquitin family	ubiquitin
Niben261Chr14g1490004	890.631	908.088	818.674	649.165	573.081	598.369	872.464	606.872	0.523564	1.28508e-08	4.63272e-07	Niben261Chr14g1490004	Niben261Chr14	149067323	149071100	+	1947	protein_coding	- && sp|Q9SUQ3|Y4374_ARATH Probable inactive receptor kinase At4g23740 OS=Arabidopsis thaliana OX=3702 GN=At4g23740 PE=1 SV=1 && PF00069:Protein kinase domain|PF08263:Leucine rich repeat N-terminal domain	Pkinase
Niben261Chr03g1647012	3649.23	3787.58	3601.96	2946.88	2869.3	2493.05	3679.59	2769.74	0.409746	1.31296e-08	4.72479e-07	Niben261Chr03g1647012	Niben261Chr03	164763582	164765698	-	1176	protein_coding	- && sp|P48620|FAD3C_SESIN Omega-3 fatty acid desaturase, chloroplastic OS=Sesamum indicum OX=4182 GN=FAD7 PE=2 SV=1 && PF00487:Fatty acid desaturase|PF11960:Domain of unknown function (DUF3474)	-
Niben261Chr17g1089003	6403.12	6581.7	6397.64	8216.62	7752.19	8079.42	6460.82	8016.08	-0.311265	1.313e-08	4.72479e-07	Niben261Chr17g1089003	Niben261Chr17	108884903	108893972	+	2889	protein_coding	- && sp|P04045|PHSL1_SOLTU Alpha-1,4 glucan phosphorylase L-1 isozyme, chloroplastic/amyloplastic OS=Solanum tuberosum OX=4113 PE=1 SV=2 && PF00343:Carbohydrate phosphorylase	-
novel.3273	1074.41	963.526	807.318	2457.34	2919.01	1765.43	948.419	2380.59	-1.32757	1.35842e-08	4.88377e-07	-	Niben261Chr09	3435489	3437099	-	703	-	- && - && -	-
Niben261Chr10g0967001	613.546	691.876	606.005	397.625	331.373	461.462	637.142	396.82	0.682069	1.36769e-08	4.91265e-07	Niben261Chr10g0967001	Niben261Chr10	96704227	96706172	+	1365	protein_coding	- && sp|Q9SZA4|CDC21_ARATH Cell division cycle 20.1, cofactor of APC complex OS=Arabidopsis thaliana OX=3702 GN=CDC20-1 PE=1 SV=1 && PF00400:WD domain, G-beta repeat|PF12894:Anaphase-promoting complex subunit 4 WD40 domain	WD40
Niben261Chr04g1823010	45.2384	38.8072	23.7447	100.616	108.184	98.6113	35.9301	102.47	-1.50782	1.40581e-08	5.04499e-07	Niben261Chr04g1823010	Niben261Chr04	182333019	182336722	-	2964	protein_coding	- && sp|P47735|RLK5_ARATH Receptor-like protein kinase 5 OS=Arabidopsis thaliana OX=3702 GN=RLK5 PE=1 SV=1 && PF00069:Protein kinase domain|PF08263:Leucine rich repeat N-terminal domain|PF13855:Leucine rich repeat	Pkinase
Niben261Chr04g0397005	420.34	434.64	369.591	646.262	707.58	560.074	408.19	637.972	-0.644332	1.42635e-08	5.11406e-07	Niben261Chr04g0397005	Niben261Chr04	39742408	39745097	+	1350	protein_coding	- && sp|Q9C757|INT2_ARATH Probable inositol transporter 2 OS=Arabidopsis thaliana OX=3702 GN=INT2 PE=1 SV=1 && PF00083:Sugar (and other) transporter|PF07690:Major Facilitator Superfamily	Sugar_tr
Niben261Chr06g0606002	373.217	389.18	285.968	921.988	1054.55	669.216	349.455	881.917	-1.33557	1.46668e-08	5.25391e-07	Niben261Chr06g0606002	Niben261Chr06	60474709	60475679	+	612	protein_coding	- && sp|Q9FGS5|NRT31_ARATH High-affinity nitrate transporter 3.1 OS=Arabidopsis thaliana OX=3702 GN=NRT3.1 PE=1 SV=1 && PF16974:High-affinity nitrate transporter accessory	-
Niben261Chr04g0432002	851.048	890.347	903.329	585.312	615.965	660.6	881.575	620.626	0.505883	1.47258e-08	5.27028e-07	Niben261Chr04g0432002	Niben261Chr04	43234922	43244861	-	1668	protein_coding	- && sp|Q8W4D6|HC173_ARATH Protein HIGH CHLOROPHYLL FLUORESCENCE PHENOTYPE 173, chloroplastic OS=Arabidopsis thaliana OX=3702 GN=HCF173 PE=1 SV=1 && PF08547:Complex I intermediate-associated protein 30 (CIA30)|PF13460:NAD(P)H-binding	-
Niben261Chr02g1243003	816.176	849.323	906.426	581.442	555.538	642.409	857.308	593.13	0.530969	1.50426e-08	5.37882e-07	Niben261Chr02g1243003	Niben261Chr02	124257455	124264206	+	1110	protein_coding	- && sp|Q0WWT7|STR11_ARATH Rhodanese-like domain-containing protein 11, chloroplastic OS=Arabidopsis thaliana OX=3702 GN=STR11 PE=2 SV=1 && PF00581:Rhodanese-like domain	Rhodanese
Niben261Chr13g0654004	703.08	618.697	571.936	881.355	931.744	941.115	631.238	918.071	-0.539107	1.52026e-08	5.43114e-07	Niben261Chr13g0654004	Niben261Chr13	65479380	65481523	+	1869	protein_coding	- && sp|Q9ASS4|Y5838_ARATH Probably inactive leucine-rich repeat receptor-like protein kinase At5g48380 OS=Arabidopsis thaliana OX=3702 GN=At5g48380 PE=1 SV=1 && PF07714:Protein tyrosine kinase	Pkinase_Tyr
Niben261Chr12g1422021	1338.3	1301.7	1279.11	948.109	929.795	1015.79	1306.37	964.565	0.437745	1.58053e-08	5.64134e-07	Niben261Chr12g1422021	Niben261Chr12	142249416	142283516	-	3930	protein_coding	- && sp|Q9LX99|KN14A_ARATH Kinesin-like protein KIN-14A OS=Arabidopsis thaliana OX=3702 GN=KIN14A PE=1 SV=1 && PF00225:Kinesin motor domain	Kinesin
Niben261Chr14g0469006	422.225	442.402	418.112	663.676	687.113	578.264	427.58	643.018	-0.58902	1.58406e-08	5.64885e-07	Niben261Chr14g0469006	Niben261Chr14	46891811	46895323	-	1080	protein_coding	- && sp|Q40143|CYSP3_SOLLC Cysteine proteinase 3 OS=Solanum lycopersicum OX=4081 GN=CYP-3 PE=2 SV=1 && PF00112:Papain family cysteine protease|PF08246:Cathepsin propeptide inhibitor domain (I29)	Peptidase_C1
Niben261Chr03g1525001	26440.9	25152.6	24956.7	19202.1	17701.2	21490.6	25516.7	19464.6	0.3906	1.65006e-08	5.87892e-07	Niben261Chr03g1525001	Niben261Chr03	152561256	152568978	+	2370	protein_coding	- && sp|O49954|GCSP_SOLTU Glycine dehydrogenase (decarboxylating), mitochondrial OS=Solanum tuberosum OX=4113 GN=GDCSP PE=2 SV=1 && PF02347:Glycine cleavage system P-protein	-
Niben261Chr11g1404004	665.382	678.571	787.703	477.924	487.314	472.951	710.552	479.396	0.567519	1.65807e-08	5.90217e-07	Niben261Chr11g1404004	Niben261Chr11	140436725	140442014	-	897	protein_coding	- && sp|Q8GWU0|PGP2_ARATH Phosphoglycolate phosphatase 2 OS=Arabidopsis thaliana OX=3702 GN=PGLP2 PE=1 SV=1 && PF13242:HAD-hyrolase-like|PF13344:Haloacid dehalogenase-like hydrolase	-
Niben261Chr08g1314002	19.7918	13.3053	16.518	57.08	81.8687	57.4435	16.5384	65.4641	-1.97612	1.66118e-08	5.90793e-07	Niben261Chr08g1314002	Niben261Chr08	131464161	131465354	-	1058	protein_coding	- && - && PF02485:Core-2/I-Branching enzyme	-
novel.3898	713.447	751.75	816.61	448.901	509.73	559.116	760.602	505.916	0.587726	1.67723e-08	5.95966e-07	-	Niben261Chr11	33668142	33671228	+	1881	-	- && Q9ZU91.2 RecName: Full=Glucan endo-1,3-beta-glucosidase 3; AltName: Full=(1->3)-beta-glucan endohydrolase 3; Short=(1->3)-beta-glucanase 3; AltName: Full=Beta-1,3-endoglucanase 3; Short=Beta-1,3-glucanase 3; Flags: Precursor && PF00332:Glycosyl hydrolases family 17	Glyco_hydro_17
Niben261Chr07g1151016	277.085	280.52	231.252	454.705	425.912	400.189	262.953	426.936	-0.69915	1.67999e-08	5.9641e-07	Niben261Chr07g1151016	Niben261Chr07	114982565	114986261	-	1593	protein_coding	- && sp|Q8VYV9|APF1_ARATH Aspartyl protease family protein 1 OS=Arabidopsis thaliana OX=3702 GN=APF1 PE=2 SV=1 && PF14543:Xylanase inhibitor N-terminal|PF14541:Xylanase inhibitor C-terminal	-
Niben261Chr19g1158012	895.344	1057.77	976.628	729.464	666.645	601.242	976.581	665.784	0.55177	1.74533e-08	6.19052e-07	Niben261Chr19g1158012	Niben261Chr19	115815263	115816553	+	588	protein_coding	- && sp|P11432|ELI_PEA Early light-induced protein, chloroplastic OS=Pisum sativum OX=3888 PE=2 SV=1 && -	-
Niben261Chr12g0838011	285.567	232.843	256.029	420.844	448.329	392.53	258.147	420.568	-0.701377	1.74968e-08	6.20039e-07	Niben261Chr12g0838011	Niben261Chr12	83644900	83647776	-	1740	protein_coding	- && sp|E7BQV0|NPR1_MALHU BTB/POZ domain and ankyrin repeat-containing protein NPR1 OS=Malus hupehensis OX=106556 GN=NPR1 PE=2 SV=2 && PF12313:NPR1/NIM1 like defence protein C terminal|PF11900:Domain of unknown function (DUF3420)|PF00651:BTB/POZ domain|PF12796:Ankyrin repeats (3 copies)	BTB
Niben261Chr03g0068005	231.847	240.604	222.993	396.658	348.917	386.786	231.815	377.454	-0.7039	1.76255e-08	6.24043e-07	Niben261Chr03g0068005	Niben261Chr03	6790932	6795764	+	1341	protein_coding	- && sp|Q9SRE5|Y1666_ARATH Uncharacterized protein At1g76660 OS=Arabidopsis thaliana OX=3702 GN=At1g76660 PE=2 SV=1 && -	-
Niben261Chr09g1307004	3507.86	3374.01	3596.8	2887.86	2550.6	2590.7	3492.89	2676.39	0.384256	1.78548e-08	6.31599e-07	Niben261Chr09g1307004	Niben261Chr09	130750513	130751133	+	489	protein_coding	- && sp|P80883|PETM_SPIOL Cytochrome b6-f complex subunit 7 (Fragment) OS=Spinacia oleracea OX=3562 GN=petM PE=1 SV=1 && PF08041:PetM family of cytochrome b6f complex subunit 7	-
novel.2418	226.192	175.187	229.188	364.732	342.094	366.681	210.189	357.836	-0.764601	1.82678e-08	6.4563e-07	-	Niben261Chr06	146537175	146539175	-	2001	-	- && Q9FKP1.1 RecName: Full=Cation/calcium exchanger 1; Short=AtCCX1; AltName: Full=Protein CATION EXCHANGER 7 && PF01699:Sodium/calcium exchanger protein	Na_Ca_ex
novel.4812	120.636	116.421	123.885	45.4705	47.7568	57.4435	120.314	50.2236	1.2603	1.87328e-08	6.61475e-07	-	Niben261Chr13	59608404	59613116	-	1745	-	- && - && -	-
Niben261Chr06g0436011	2117.72	2071.19	2090.56	1700.79	1551.61	1482.04	2093.16	1578.15	0.407604	1.90861e-08	6.73352e-07	Niben261Chr06g0436011	Niben261Chr06	43627658	43631350	-	495	protein_coding	- && sp|P82137|RR17_SPIOL 30S ribosomal protein S17, chloroplastic OS=Spinacia oleracea OX=3562 GN=RPS17 PE=1 SV=2 && PF00366:Ribosomal protein S17	-
Niben261Chr19g1247001	69.7426	49.8949	36.1332	135.444	121.828	138.822	51.9235	132.031	-1.33977	1.96876e-08	6.93401e-07	Niben261Chr19g1247001	Niben261Chr19	124758019	124761923	+	1091	protein_coding	- && sp|Q0WRB2|P2C73_ARATH Probable protein phosphatase 2C 73 OS=Arabidopsis thaliana OX=3702 GN=PPC6-7 PE=2 SV=1 && PF00481:Protein phosphatase 2C	PP2C
Niben261Chr07g0996014	1241.23	1292.83	1271.89	935.532	803.093	975.581	1268.65	904.736	0.48733	1.96894e-08	6.93401e-07	Niben261Chr07g0996014	Niben261Chr07	99652799	99654732	-	522	protein_coding	- && sp|P82024|RR21_SPIOL 30S ribosomal protein S21, chloroplastic OS=Spinacia oleracea OX=3562 GN=rps21 PE=1 SV=2 && PF01165:Ribosomal protein S21	-
Niben261Chr03g1023007	175.299	88.7021	109.432	399.56	532.147	381.999	124.478	437.902	-1.81178	1.99047e-08	7.0036e-07	Niben261Chr03g1023007	Niben261Chr03	102373960	102375098	+	594	protein_coding	- && sp|Q8H6W9|LRR1_CAPAN Leucine-rich repeat protein 1 OS=Capsicum annuum OX=4072 GN=LRR1 PE=1 SV=2 && PF13855:Leucine rich repeat|PF08263:Leucine rich repeat N-terminal domain	LRRNT_2
Niben261Chr11g0581001	1632.35	1684.23	1734.39	1318.65	1226.08	1272.37	1683.66	1272.37	0.40384	2.00921e-08	7.06326e-07	Niben261Chr11g0581001	Niben261Chr11	58087898	58088374	+	390	protein_coding	- && sp|P82249|RK31_SPIOL 50S ribosomal protein L31, chloroplastic OS=Spinacia oleracea OX=3562 GN=RPL31 PE=1 SV=2 && PF01197:Ribosomal protein L31	-
novel.4723	1139.44	1152.02	1172.78	1619.53	1480.46	1519.38	1154.75	1539.79	-0.415273	2.01269e-08	7.06923e-07	-	Niben261Chr13	133872663	133875462	+	884	-	- && Q0D5W6.1 RecName: Full=Protein translation factor SUI1 homolog; AltName: Full=Protein GOS2; AltName: Full=Protein eIF1; AltName: Full=Translation initiation factor 1 >A6MZM2.1 RecName: Full=Protein translation factor SUI1 homolog; AltName: Full=Protein GOS2; AltName: Full=Protein eIF1; AltName: Full=Translation initiation factor 1 && PF01253:Translation initiation factor SUI1	SUI1
novel.2191	282.74	241.713	278.742	452.771	413.242	417.422	267.732	427.812	-0.674206	2.0362e-08	7.14545e-07	-	Niben261Chr06	134798166	134805054	+	1931	-	- && Q9ZQG9.2 RecName: Full=Glucan endo-1,3-beta-glucosidase 14; AltName: Full=(1->3)-beta-glucan endohydrolase 14; Short=(1->3)-beta-glucanase 14; AltName: Full=Beta-1,3-endoglucanase 14; Short=Beta-1,3-glucanase 14; Flags: Precursor && PF00332:Glycosyl hydrolases family 17	Glyco_hydro_17
Niben261Chr17g1033013	2468.32	2449.29	2407.5	1882.67	1801.11	1975.1	2441.7	1886.29	0.372317	2.05562e-08	7.20722e-07	Niben261Chr17g1033013	Niben261Chr17	103344014	103364021	-	873	protein_coding	- && sp|Q1EBV7|BASS2_ARATH Sodium/pyruvate cotransporter BASS2, chloroplastic OS=Arabidopsis thaliana OX=3702 GN=BASS2 PE=1 SV=1 && PF01758:Sodium Bile acid symporter family	-
Niben261Chr09g1277006	330.806	320.436	331.393	515.655	538.969	461.462	327.545	505.362	-0.625083	2.07991e-08	7.28592e-07	Niben261Chr09g1277006	Niben261Chr09	127698547	127704950	+	1203	protein_coding	- && sp|Q94JT5|CYL2_ARATH Cyclase-like protein 2 OS=Arabidopsis thaliana OX=3702 GN=CYCLASE2 PE=2 SV=1 && PF04199:Putative cyclase	-
novel.3548	1369.4	1512.37	1390.61	1022.6	906.404	1110.57	1424.13	1013.19	0.490515	2.18281e-08	7.63965e-07	-	Niben261Chr10	56142723	56144038	+	1232	-	- && O80361.1 RecName: Full=50S ribosomal protein L4, chloroplastic; AltName: Full=CL4; AltName: Full=R-protein L4; Flags: Precursor && PF00573:Ribosomal protein L4/L1 family	-
Niben261Chr04g1767010	1646.49	1267.33	1012.76	3062.01	2754.3	2943.02	1308.86	2919.77	-1.15724	2.19544e-08	7.67488e-07	Niben261Chr04g1767010	Niben261Chr04	176761481	176764207	-	960	protein_coding	- && sp|Q08507|ACCO3_PETHY 1-aminocyclopropane-1-carboxylate oxidase 3 OS=Petunia hybrida OX=4102 GN=ACO3 PE=3 SV=1 && PF14226:non-haem dioxygenase in morphine synthesis N-terminal|PF03171:2OG-Fe(II) oxygenase superfamily	2OG-FeII_Oxy
Niben261Chr18g0571006	33.9288	11.0878	12.3885	78.3641	76.021	76.5913	19.135	76.9921	-1.98571	2.19675e-08	7.67488e-07	Niben261Chr18g0571006	Niben261Chr18	57115054	57146136	+	1551	protein_coding	- && sp|Q8LGM7|MOCOS_SOLLC Molybdenum cofactor sulfurase OS=Solanum lycopersicum OX=4081 GN=FLACCA PE=2 SV=1 && PF03476:MOSC N-terminal beta barrel domain|PF00266:Aminotransferase class-V	Aminotran_5
Niben261Chr09g0533015	1938.65	1979.17	1904.73	1400.88	1299.18	1575.87	1940.85	1425.31	0.445204	2.22175e-08	7.75539e-07	Niben261Chr09g0533015	Niben261Chr09	53369845	53380108	-	1866	protein_coding	- && sp|O24163|PPOC_TOBAC Protoporphyrinogen oxidase, chloroplastic OS=Nicotiana tabacum OX=4097 GN=PPXI PE=2 SV=1 && PF01593:Flavin containing amine oxidoreductase	Amino_oxidase
Niben261Chr02g1386007	7754.62	7192.63	7533.25	9657.17	9395.41	9031.07	7493.5	9361.22	-0.320882	2.22812e-08	7.77077e-07	Niben261Chr02g1386007	Niben261Chr02	138609631	138612834	+	1509	protein_coding	- && sp|P43297|RD21A_ARATH Cysteine proteinase RD21A OS=Arabidopsis thaliana OX=3702 GN=RD21A PE=1 SV=1 && PF00396:Granulin|PF08246:Cathepsin propeptide inhibitor domain (I29)|PF00112:Papain family cysteine protease	Peptidase_C1
Niben261Chr18g1248003	81.9946	87.5933	49.5541	219.613	166.661	141.694	73.0473	175.989	-1.26901	2.28164e-08	7.95042e-07	Niben261Chr18g1248003	Niben261Chr18	124791575	124795898	-	2394	protein_coding	- && sp|Q08891|FACR2_ARATH Fatty acyl-CoA reductase 2, chloroplastic OS=Arabidopsis thaliana OX=3702 GN=FAR2 PE=1 SV=2 && PF07993:Male sterility protein|PF03015:Male sterility protein	NAD_binding_4
Niben261Chr02g0270003	1635.18	1739.67	1541.34	1161.92	1192.94	1280.99	1638.73	1211.95	0.434853	2.28841e-08	7.96699e-07	Niben261Chr02g0270003	Niben261Chr02	26951995	26955718	-	1887	protein_coding	- && sp|Q9ZQC5|ICR2_ARATH Interactor of constitutive active ROPs 2, chloroplastic OS=Arabidopsis thaliana OX=3702 GN=ICR2 PE=1 SV=1 && -	-
Niben261Chr01g0212003	20389.3	19451.3	19497.5	16008.5	14352.4	16376.2	19779.3	15579	0.344414	2.31799e-08	8.06291e-07	Niben261Chr01g0212003	Niben261Chr01	21204694	21208099	+	1143	protein_coding	- && sp|P05414|GOX_SPIOL Peroxisomal (S)-2-hydroxy-acid oxidase OS=Spinacia oleracea OX=3562 PE=1 SV=1 && PF01070:FMN-dependent dehydrogenase	FMN_dh
Niben261Chr03g1535012	311.014	289.391	323.134	491.469	451.253	484.44	307.846	475.72	-0.627105	2.33082e-08	8.10041e-07	Niben261Chr03g1535012	Niben261Chr03	153498113	153507214	-	1455	protein_coding	- && sp|P42044|HEMH_CUCSA Ferrochelatase-2, chloroplastic OS=Cucumis sativus OX=3659 GN=HEMH PE=2 SV=1 && PF00762:Ferrochelatase	-
Niben261Chr09g0796005	88.5919	76.5056	83.6225	178.98	183.23	152.225	82.9066	171.478	-1.04582	2.3362e-08	8.11199e-07	Niben261Chr09g0796005	Niben261Chr09	79598717	79603912	-	1170	protein_coding	- && sp|Q8W4F0|DAR1_ARATH Protein DA1-related 1 OS=Arabidopsis thaliana OX=3702 GN=DAR1 PE=1 SV=3 && PF12315:Protein DA1	-
Niben261Chr16g0341001	105.556	97.5723	84.6548	190.589	195.9	181.904	95.9278	189.465	-0.980212	2.42275e-08	8.40517e-07	Niben261Chr16g0341001	Niben261Chr16	34054912	34057941	+	2487	protein_coding	- && sp|Q9SXB4|Y1130_ARATH G-type lectin S-receptor-like serine/threonine-protein kinase At1g11300 OS=Arabidopsis thaliana OX=3702 GN=At1g11300 PE=2 SV=1 && PF00954:S-locus glycoprotein domain|PF07714:Protein tyrosine kinase|PF08276:PAN-like domain|PF01453:D-mannose binding lectin|PF11883:Domain of unknown function (DUF3403)	Pkinase_Tyr
Niben261Chr02g1465001	42.411	52.1125	47.4893	118.03	151.067	95.7391	47.3376	121.612	-1.36428	2.53859e-08	8.79932e-07	Niben261Chr02g1465001	Niben261Chr02	146568125	146578728	-	1344	protein_coding	- && sp|P81370|TLP_ACTDE Thaumatin-like protein OS=Actinidia deliciosa OX=3627 GN=tlp PE=1 SV=2 && PF00314:Thaumatin family	Thaumatin
Niben261Chr07g1026002	1144.15	1200.8	1131.48	858.136	719.275	876.013	1158.81	817.808	0.502379	2.55115e-08	8.83514e-07	Niben261Chr07g1026002	Niben261Chr07	102525706	102526170	+	465	protein_coding	- && - && -	-
[truncated: 43,701 more rows]
