# Supplementary material for: Regulation of Disease-Resistance Genes against CWMV Infection by NbHAG1-Mediated H3K36ac
Source: Int J Mol Sci. 2024 Feb 28;25(5):2800. doi: 10.3390/ijms25052800 (PMC10931728; doi:10.3390/ijms25052800)
Supplement: Supplementary file 1 [file ijms-25-02800-s001.zip › ijms-2871725-supplementary/Table S5. Raw data from GO enrichment analysis of DEGs in OEH vs Nb.xls]

## Sheet: Sheet1
Table S5. Raw data from Gene Ontology (GO) enrichment analysis of DEGs in OEH and Nb.
Category	GOID	Description	GeneRatio	BgRatio	pvalue	padj	geneID	geneName	Count	Up	Up_Gene_id	Down	Down_Gene_id
BP	GO:0051704	multi-organism process	17/330	66/11266	3.90748e-12	1.07065e-09	Niben261Scf00054g0000006/Niben261Chr11g0759004/Niben261Chr19g1470004/Niben261Chr10g0373006/Niben261Chr11g0271006/Niben261Chr01g0363002/Niben261Chr09g1046007/Niben261Chr12g0629011/Niben261Chr07g1363003/Niben261Chr02g0529012/Niben261Chr10g1026005/novel.5970/Niben261Chr10g0871014/Niben261Chr03g0424001/Niben261Chr07g1363004/Niben261Chr13g0326023/Niben261Chr01g1304003	Niben261Scf00054g0000006/Niben261Chr11g0759004/Niben261Chr19g1470004/Niben261Chr10g0373006/Niben261Chr11g0271006/Niben261Chr01g0363002/Niben261Chr09g1046007/Niben261Chr12g0629011/Niben261Chr07g1363003/Niben261Chr02g0529012/Niben261Chr10g1026005/-/Niben261Chr10g0871014/Niben261Chr03g0424001/Niben261Chr07g1363004/Niben261Chr13g0326023/Niben261Chr01g1304003	17	0		17	Niben261Scf00054g0000006/Niben261Chr11g0759004/Niben261Chr19g1470004/Niben261Chr10g0373006/Niben261Chr11g0271006/Niben261Chr01g0363002/Niben261Chr09g1046007/Niben261Chr12g0629011/Niben261Chr07g1363003/Niben261Chr02g0529012/Niben261Chr10g1026005/novel.5970/Niben261Chr10g0871014/Niben261Chr03g0424001/Niben261Chr07g1363004/Niben261Chr13g0326023/Niben261Chr01g1304003
BP	GO:0008037	cell recognition	15/330	64/11266	3.17781e-10	1.4512e-08	Niben261Chr11g0759004/Niben261Chr19g1470004/Niben261Chr10g0373006/Niben261Chr11g0271006/Niben261Chr01g0363002/Niben261Chr12g0629011/Niben261Chr07g1363003/Niben261Chr02g0529012/Niben261Chr10g1026005/novel.5970/Niben261Chr10g0871014/Niben261Chr03g0424001/Niben261Chr07g1363004/Niben261Chr13g0326023/Niben261Chr01g1304003	Niben261Chr11g0759004/Niben261Chr19g1470004/Niben261Chr10g0373006/Niben261Chr11g0271006/Niben261Chr01g0363002/Niben261Chr12g0629011/Niben261Chr07g1363003/Niben261Chr02g0529012/Niben261Chr10g1026005/-/Niben261Chr10g0871014/Niben261Chr03g0424001/Niben261Chr07g1363004/Niben261Chr13g0326023/Niben261Chr01g1304003	15	0		15	Niben261Chr11g0759004/Niben261Chr19g1470004/Niben261Chr10g0373006/Niben261Chr11g0271006/Niben261Chr01g0363002/Niben261Chr12g0629011/Niben261Chr07g1363003/Niben261Chr02g0529012/Niben261Chr10g1026005/novel.5970/Niben261Chr10g0871014/Niben261Chr03g0424001/Niben261Chr07g1363004/Niben261Chr13g0326023/Niben261Chr01g1304003
BP	GO:0009856	pollination	15/330	64/11266	3.17781e-10	1.4512e-08	Niben261Chr11g0759004/Niben261Chr19g1470004/Niben261Chr10g0373006/Niben261Chr11g0271006/Niben261Chr01g0363002/Niben261Chr12g0629011/Niben261Chr07g1363003/Niben261Chr02g0529012/Niben261Chr10g1026005/novel.5970/Niben261Chr10g0871014/Niben261Chr03g0424001/Niben261Chr07g1363004/Niben261Chr13g0326023/Niben261Chr01g1304003	Niben261Chr11g0759004/Niben261Chr19g1470004/Niben261Chr10g0373006/Niben261Chr11g0271006/Niben261Chr01g0363002/Niben261Chr12g0629011/Niben261Chr07g1363003/Niben261Chr02g0529012/Niben261Chr10g1026005/-/Niben261Chr10g0871014/Niben261Chr03g0424001/Niben261Chr07g1363004/Niben261Chr13g0326023/Niben261Chr01g1304003	15	0		15	Niben261Chr11g0759004/Niben261Chr19g1470004/Niben261Chr10g0373006/Niben261Chr11g0271006/Niben261Chr01g0363002/Niben261Chr12g0629011/Niben261Chr07g1363003/Niben261Chr02g0529012/Niben261Chr10g1026005/novel.5970/Niben261Chr10g0871014/Niben261Chr03g0424001/Niben261Chr07g1363004/Niben261Chr13g0326023/Niben261Chr01g1304003
BP	GO:0009875	pollen-pistil interaction	15/330	64/11266	3.17781e-10	1.4512e-08	Niben261Chr11g0759004/Niben261Chr19g1470004/Niben261Chr10g0373006/Niben261Chr11g0271006/Niben261Chr01g0363002/Niben261Chr12g0629011/Niben261Chr07g1363003/Niben261Chr02g0529012/Niben261Chr10g1026005/novel.5970/Niben261Chr10g0871014/Niben261Chr03g0424001/Niben261Chr07g1363004/Niben261Chr13g0326023/Niben261Chr01g1304003	Niben261Chr11g0759004/Niben261Chr19g1470004/Niben261Chr10g0373006/Niben261Chr11g0271006/Niben261Chr01g0363002/Niben261Chr12g0629011/Niben261Chr07g1363003/Niben261Chr02g0529012/Niben261Chr10g1026005/-/Niben261Chr10g0871014/Niben261Chr03g0424001/Niben261Chr07g1363004/Niben261Chr13g0326023/Niben261Chr01g1304003	15	0		15	Niben261Chr11g0759004/Niben261Chr19g1470004/Niben261Chr10g0373006/Niben261Chr11g0271006/Niben261Chr01g0363002/Niben261Chr12g0629011/Niben261Chr07g1363003/Niben261Chr02g0529012/Niben261Chr10g1026005/novel.5970/Niben261Chr10g0871014/Niben261Chr03g0424001/Niben261Chr07g1363004/Niben261Chr13g0326023/Niben261Chr01g1304003
BP	GO:0044706	multi-multicellular organism process	15/330	64/11266	3.17781e-10	1.4512e-08	Niben261Chr11g0759004/Niben261Chr19g1470004/Niben261Chr10g0373006/Niben261Chr11g0271006/Niben261Chr01g0363002/Niben261Chr12g0629011/Niben261Chr07g1363003/Niben261Chr02g0529012/Niben261Chr10g1026005/novel.5970/Niben261Chr10g0871014/Niben261Chr03g0424001/Niben261Chr07g1363004/Niben261Chr13g0326023/Niben261Chr01g1304003	Niben261Chr11g0759004/Niben261Chr19g1470004/Niben261Chr10g0373006/Niben261Chr11g0271006/Niben261Chr01g0363002/Niben261Chr12g0629011/Niben261Chr07g1363003/Niben261Chr02g0529012/Niben261Chr10g1026005/-/Niben261Chr10g0871014/Niben261Chr03g0424001/Niben261Chr07g1363004/Niben261Chr13g0326023/Niben261Chr01g1304003	15	0		15	Niben261Chr11g0759004/Niben261Chr19g1470004/Niben261Chr10g0373006/Niben261Chr11g0271006/Niben261Chr01g0363002/Niben261Chr12g0629011/Niben261Chr07g1363003/Niben261Chr02g0529012/Niben261Chr10g1026005/novel.5970/Niben261Chr10g0871014/Niben261Chr03g0424001/Niben261Chr07g1363004/Niben261Chr13g0326023/Niben261Chr01g1304003
BP	GO:0048544	recognition of pollen	15/330	64/11266	3.17781e-10	1.4512e-08	Niben261Chr11g0759004/Niben261Chr19g1470004/Niben261Chr10g0373006/Niben261Chr11g0271006/Niben261Chr01g0363002/Niben261Chr12g0629011/Niben261Chr07g1363003/Niben261Chr02g0529012/Niben261Chr10g1026005/novel.5970/Niben261Chr10g0871014/Niben261Chr03g0424001/Niben261Chr07g1363004/Niben261Chr13g0326023/Niben261Chr01g1304003	Niben261Chr11g0759004/Niben261Chr19g1470004/Niben261Chr10g0373006/Niben261Chr11g0271006/Niben261Chr01g0363002/Niben261Chr12g0629011/Niben261Chr07g1363003/Niben261Chr02g0529012/Niben261Chr10g1026005/-/Niben261Chr10g0871014/Niben261Chr03g0424001/Niben261Chr07g1363004/Niben261Chr13g0326023/Niben261Chr01g1304003	15	0		15	Niben261Chr11g0759004/Niben261Chr19g1470004/Niben261Chr10g0373006/Niben261Chr11g0271006/Niben261Chr01g0363002/Niben261Chr12g0629011/Niben261Chr07g1363003/Niben261Chr02g0529012/Niben261Chr10g1026005/novel.5970/Niben261Chr10g0871014/Niben261Chr03g0424001/Niben261Chr07g1363004/Niben261Chr13g0326023/Niben261Chr01g1304003
BP	GO:0000003	reproduction	15/330	77/11266	4.97661e-09	1.70449e-07	Niben261Chr11g0759004/Niben261Chr19g1470004/Niben261Chr10g0373006/Niben261Chr11g0271006/Niben261Chr01g0363002/Niben261Chr12g0629011/Niben261Chr07g1363003/Niben261Chr02g0529012/Niben261Chr10g1026005/novel.5970/Niben261Chr10g0871014/Niben261Chr03g0424001/Niben261Chr07g1363004/Niben261Chr13g0326023/Niben261Chr01g1304003	Niben261Chr11g0759004/Niben261Chr19g1470004/Niben261Chr10g0373006/Niben261Chr11g0271006/Niben261Chr01g0363002/Niben261Chr12g0629011/Niben261Chr07g1363003/Niben261Chr02g0529012/Niben261Chr10g1026005/-/Niben261Chr10g0871014/Niben261Chr03g0424001/Niben261Chr07g1363004/Niben261Chr13g0326023/Niben261Chr01g1304003	15	0		15	Niben261Chr11g0759004/Niben261Chr19g1470004/Niben261Chr10g0373006/Niben261Chr11g0271006/Niben261Chr01g0363002/Niben261Chr12g0629011/Niben261Chr07g1363003/Niben261Chr02g0529012/Niben261Chr10g1026005/novel.5970/Niben261Chr10g0871014/Niben261Chr03g0424001/Niben261Chr07g1363004/Niben261Chr13g0326023/Niben261Chr01g1304003
BP	GO:0022414	reproductive process	15/330	77/11266	4.97661e-09	1.70449e-07	Niben261Chr11g0759004/Niben261Chr19g1470004/Niben261Chr10g0373006/Niben261Chr11g0271006/Niben261Chr01g0363002/Niben261Chr12g0629011/Niben261Chr07g1363003/Niben261Chr02g0529012/Niben261Chr10g1026005/novel.5970/Niben261Chr10g0871014/Niben261Chr03g0424001/Niben261Chr07g1363004/Niben261Chr13g0326023/Niben261Chr01g1304003	Niben261Chr11g0759004/Niben261Chr19g1470004/Niben261Chr10g0373006/Niben261Chr11g0271006/Niben261Chr01g0363002/Niben261Chr12g0629011/Niben261Chr07g1363003/Niben261Chr02g0529012/Niben261Chr10g1026005/-/Niben261Chr10g0871014/Niben261Chr03g0424001/Niben261Chr07g1363004/Niben261Chr13g0326023/Niben261Chr01g1304003	15	0		15	Niben261Chr11g0759004/Niben261Chr19g1470004/Niben261Chr10g0373006/Niben261Chr11g0271006/Niben261Chr01g0363002/Niben261Chr12g0629011/Niben261Chr07g1363003/Niben261Chr02g0529012/Niben261Chr10g1026005/novel.5970/Niben261Chr10g0871014/Niben261Chr03g0424001/Niben261Chr07g1363004/Niben261Chr13g0326023/Niben261Chr01g1304003
BP	GO:0032501	multicellular organismal process	15/330	106/11266	4.23808e-07	1.29026e-05	Niben261Chr11g0759004/Niben261Chr19g1470004/Niben261Chr10g0373006/Niben261Chr11g0271006/Niben261Chr01g0363002/Niben261Chr12g0629011/Niben261Chr07g1363003/Niben261Chr02g0529012/Niben261Chr10g1026005/novel.5970/Niben261Chr10g0871014/Niben261Chr03g0424001/Niben261Chr07g1363004/Niben261Chr13g0326023/Niben261Chr01g1304003	Niben261Chr11g0759004/Niben261Chr19g1470004/Niben261Chr10g0373006/Niben261Chr11g0271006/Niben261Chr01g0363002/Niben261Chr12g0629011/Niben261Chr07g1363003/Niben261Chr02g0529012/Niben261Chr10g1026005/-/Niben261Chr10g0871014/Niben261Chr03g0424001/Niben261Chr07g1363004/Niben261Chr13g0326023/Niben261Chr01g1304003	15	0		15	Niben261Chr11g0759004/Niben261Chr19g1470004/Niben261Chr10g0373006/Niben261Chr11g0271006/Niben261Chr01g0363002/Niben261Chr12g0629011/Niben261Chr07g1363003/Niben261Chr02g0529012/Niben261Chr10g1026005/novel.5970/Niben261Chr10g0871014/Niben261Chr03g0424001/Niben261Chr07g1363004/Niben261Chr13g0326023/Niben261Chr01g1304003
BP	GO:0006022	aminoglycan metabolic process	6/330	16/11266	3.77125e-06	5.43854e-05	Niben261Chr07g1178010/Niben261Chr08g1237022/Niben261Chr18g1375009/Niben261Chr13g0010010/Niben261Chr15g1422003/Niben261Chr15g1259003	Niben261Chr07g1178010/Niben261Chr08g1237022/Niben261Chr18g1375009/Niben261Chr13g0010010/Niben261Chr15g1422003/Niben261Chr15g1259003	6	1	Niben261Chr08g1237022	5	Niben261Chr07g1178010/Niben261Chr18g1375009/Niben261Chr13g0010010/Niben261Chr15g1422003/Niben261Chr15g1259003
BP	GO:0006026	aminoglycan catabolic process	6/330	16/11266	3.77125e-06	5.43854e-05	Niben261Chr07g1178010/Niben261Chr08g1237022/Niben261Chr18g1375009/Niben261Chr13g0010010/Niben261Chr15g1422003/Niben261Chr15g1259003	Niben261Chr07g1178010/Niben261Chr08g1237022/Niben261Chr18g1375009/Niben261Chr13g0010010/Niben261Chr15g1422003/Niben261Chr15g1259003	6	1	Niben261Chr08g1237022	5	Niben261Chr07g1178010/Niben261Chr18g1375009/Niben261Chr13g0010010/Niben261Chr15g1422003/Niben261Chr15g1259003
BP	GO:0006030	chitin metabolic process	6/330	16/11266	3.77125e-06	5.43854e-05	Niben261Chr07g1178010/Niben261Chr08g1237022/Niben261Chr18g1375009/Niben261Chr13g0010010/Niben261Chr15g1422003/Niben261Chr15g1259003	Niben261Chr07g1178010/Niben261Chr08g1237022/Niben261Chr18g1375009/Niben261Chr13g0010010/Niben261Chr15g1422003/Niben261Chr15g1259003	6	1	Niben261Chr08g1237022	5	Niben261Chr07g1178010/Niben261Chr18g1375009/Niben261Chr13g0010010/Niben261Chr15g1422003/Niben261Chr15g1259003
BP	GO:0006032	chitin catabolic process	6/330	16/11266	3.77125e-06	5.43854e-05	Niben261Chr07g1178010/Niben261Chr08g1237022/Niben261Chr18g1375009/Niben261Chr13g0010010/Niben261Chr15g1422003/Niben261Chr15g1259003	Niben261Chr07g1178010/Niben261Chr08g1237022/Niben261Chr18g1375009/Niben261Chr13g0010010/Niben261Chr15g1422003/Niben261Chr15g1259003	6	1	Niben261Chr08g1237022	5	Niben261Chr07g1178010/Niben261Chr18g1375009/Niben261Chr13g0010010/Niben261Chr15g1422003/Niben261Chr15g1259003
BP	GO:0006040	amino sugar metabolic process	6/330	16/11266	3.77125e-06	5.43854e-05	Niben261Chr07g1178010/Niben261Chr08g1237022/Niben261Chr18g1375009/Niben261Chr13g0010010/Niben261Chr15g1422003/Niben261Chr15g1259003	Niben261Chr07g1178010/Niben261Chr08g1237022/Niben261Chr18g1375009/Niben261Chr13g0010010/Niben261Chr15g1422003/Niben261Chr15g1259003	6	1	Niben261Chr08g1237022	5	Niben261Chr07g1178010/Niben261Chr18g1375009/Niben261Chr13g0010010/Niben261Chr15g1422003/Niben261Chr15g1259003
BP	GO:0016998	cell wall macromolecule catabolic process	6/330	16/11266	3.77125e-06	5.43854e-05	Niben261Chr07g1178010/Niben261Chr08g1237022/Niben261Chr18g1375009/Niben261Chr13g0010010/Niben261Chr15g1422003/Niben261Chr15g1259003	Niben261Chr07g1178010/Niben261Chr08g1237022/Niben261Chr18g1375009/Niben261Chr13g0010010/Niben261Chr15g1422003/Niben261Chr15g1259003	6	1	Niben261Chr08g1237022	5	Niben261Chr07g1178010/Niben261Chr18g1375009/Niben261Chr13g0010010/Niben261Chr15g1422003/Niben261Chr15g1259003
BP	GO:0044036	cell wall macromolecule metabolic process	6/330	16/11266	3.77125e-06	5.43854e-05	Niben261Chr07g1178010/Niben261Chr08g1237022/Niben261Chr18g1375009/Niben261Chr13g0010010/Niben261Chr15g1422003/Niben261Chr15g1259003	Niben261Chr07g1178010/Niben261Chr08g1237022/Niben261Chr18g1375009/Niben261Chr13g0010010/Niben261Chr15g1422003/Niben261Chr15g1259003	6	1	Niben261Chr08g1237022	5	Niben261Chr07g1178010/Niben261Chr18g1375009/Niben261Chr13g0010010/Niben261Chr15g1422003/Niben261Chr15g1259003
BP	GO:0046348	amino sugar catabolic process	6/330	16/11266	3.77125e-06	5.43854e-05	Niben261Chr07g1178010/Niben261Chr08g1237022/Niben261Chr18g1375009/Niben261Chr13g0010010/Niben261Chr15g1422003/Niben261Chr15g1259003	Niben261Chr07g1178010/Niben261Chr08g1237022/Niben261Chr18g1375009/Niben261Chr13g0010010/Niben261Chr15g1422003/Niben261Chr15g1259003	6	1	Niben261Chr08g1237022	5	Niben261Chr07g1178010/Niben261Chr18g1375009/Niben261Chr13g0010010/Niben261Chr15g1422003/Niben261Chr15g1259003
BP	GO:1901071	glucosamine-containing compound metabolic process	6/330	16/11266	3.77125e-06	5.43854e-05	Niben261Chr07g1178010/Niben261Chr08g1237022/Niben261Chr18g1375009/Niben261Chr13g0010010/Niben261Chr15g1422003/Niben261Chr15g1259003	Niben261Chr07g1178010/Niben261Chr08g1237022/Niben261Chr18g1375009/Niben261Chr13g0010010/Niben261Chr15g1422003/Niben261Chr15g1259003	6	1	Niben261Chr08g1237022	5	Niben261Chr07g1178010/Niben261Chr18g1375009/Niben261Chr13g0010010/Niben261Chr15g1422003/Niben261Chr15g1259003
BP	GO:1901072	glucosamine-containing compound catabolic process	6/330	16/11266	3.77125e-06	5.43854e-05	Niben261Chr07g1178010/Niben261Chr08g1237022/Niben261Chr18g1375009/Niben261Chr13g0010010/Niben261Chr15g1422003/Niben261Chr15g1259003	Niben261Chr07g1178010/Niben261Chr08g1237022/Niben261Chr18g1375009/Niben261Chr13g0010010/Niben261Chr15g1422003/Niben261Chr15g1259003	6	1	Niben261Chr08g1237022	5	Niben261Chr07g1178010/Niben261Chr18g1375009/Niben261Chr13g0010010/Niben261Chr15g1422003/Niben261Chr15g1259003
BP	GO:0042737	drug catabolic process	6/330	20/11266	1.65271e-05	0.000226421	Niben261Chr07g1178010/Niben261Chr08g1237022/Niben261Chr18g1375009/Niben261Chr13g0010010/Niben261Chr15g1422003/Niben261Chr15g1259003	Niben261Chr07g1178010/Niben261Chr08g1237022/Niben261Chr18g1375009/Niben261Chr13g0010010/Niben261Chr15g1422003/Niben261Chr15g1259003	6	1	Niben261Chr08g1237022	5	Niben261Chr07g1178010/Niben261Chr18g1375009/Niben261Chr13g0010010/Niben261Chr15g1422003/Niben261Chr15g1259003
BP	GO:1901136	carbohydrate derivative catabolic process	6/330	26/11266	8.46083e-05	0.00110394	Niben261Chr07g1178010/Niben261Chr08g1237022/Niben261Chr18g1375009/Niben261Chr13g0010010/Niben261Chr15g1422003/Niben261Chr15g1259003	Niben261Chr07g1178010/Niben261Chr08g1237022/Niben261Chr18g1375009/Niben261Chr13g0010010/Niben261Chr15g1422003/Niben261Chr15g1259003	6	1	Niben261Chr08g1237022	5	Niben261Chr07g1178010/Niben261Chr18g1375009/Niben261Chr13g0010010/Niben261Chr15g1422003/Niben261Chr15g1259003
BP	GO:0006952	defense response	9/330	65/11266	0.000107235	0.00133557	Niben261Scf00054g0000006/Niben261Chr09g1046007/Niben261Chr15g1414001/Niben261Chr04g1121014/Niben261Chr16g1253006/Niben261Chr17g0105004/Niben261Chr07g0430005/Niben261Chr13g0657009/novel.6324	Niben261Scf00054g0000006/Niben261Chr09g1046007/Niben261Chr15g1414001/Niben261Chr04g1121014/Niben261Chr16g1253006/Niben261Chr17g0105004/Niben261Chr07g0430005/Niben261Chr13g0657009/-	9	1	novel.6324	8	Niben261Scf00054g0000006/Niben261Chr09g1046007/Niben261Chr15g1414001/Niben261Chr04g1121014/Niben261Chr16g1253006/Niben261Chr17g0105004/Niben261Chr07g0430005/Niben261Chr13g0657009
BP	GO:0001101	response to acid chemical	4/330	14/11266	0.000573315	0.00654535	Niben261Chr07g1087016/Niben261Chr06g0606002/Niben261Chr07g1087006/Niben261Chr08g0276003	Niben261Chr07g1087016/Niben261Chr06g0606002/Niben261Chr07g1087006/Niben261Chr08g0276003	4	0		4	Niben261Chr07g1087016/Niben261Chr06g0606002/Niben261Chr07g1087006/Niben261Chr08g0276003
BP	GO:1901700	response to oxygen-containing compound	4/330	14/11266	0.000573315	0.00654535	Niben261Chr07g1087016/Niben261Chr06g0606002/Niben261Chr07g1087006/Niben261Chr08g0276003	Niben261Chr07g1087016/Niben261Chr06g0606002/Niben261Chr07g1087006/Niben261Chr08g0276003	4	0		4	Niben261Chr07g1087016/Niben261Chr06g0606002/Niben261Chr07g1087006/Niben261Chr08g0276003
BP	GO:0010035	response to inorganic substance	4/330	18/11266	0.00159744	0.017508	Niben261Chr07g1087016/Niben261Chr06g0606002/Niben261Chr07g1087006/Niben261Chr08g0276003	Niben261Chr07g1087016/Niben261Chr06g0606002/Niben261Chr07g1087006/Niben261Chr08g0276003	4	0		4	Niben261Chr07g1087016/Niben261Chr06g0606002/Niben261Chr07g1087006/Niben261Chr08g0276003
BP	GO:0009611	response to wounding	3/330	10/11266	0.00256409	0.0270215	Niben261Chr10g0135007/Niben261Chr10g0130005/Niben261Chr10g0137007	Niben261Chr10g0135007/Niben261Chr10g0130005/Niben261Chr10g0137007	3	0		3	Niben261Chr10g0135007/Niben261Chr10g0130005/Niben261Chr10g0137007
BP	GO:0007154	cell communication	19/330	325/11266	0.00330698	0.0335597	Niben261Chr11g0759004/Niben261Chr19g1470004/Niben261Chr10g0373006/Niben261Chr11g0271006/Niben261Chr01g0363002/Niben261Chr12g0629011/Niben261Chr07g1363003/Niben261Chr02g0529012/Niben261Chr10g1026005/novel.5970/Niben261Chr10g0871014/Niben261Chr03g0424001/Niben261Chr18g0631005/Niben261Chr07g1363004/Niben261Chr18g1427010/Niben261Chr13g0326023/Niben261Chr05g0791009/Niben261Chr01g1304003/Niben261Chr03g…	Niben261Chr11g0759004/Niben261Chr19g1470004/Niben261Chr10g0373006/Niben261Chr11g0271006/Niben261Chr01g0363002/Niben261Chr12g0629011/Niben261Chr07g1363003/Niben261Chr02g0529012/Niben261Chr10g1026005/-/Niben261Chr10g0871014/Niben261Chr03g0424001/Niben261Chr18g0631005/Niben261Chr07g1363004/Niben261Chr18g1427010/Niben261Chr13g0326023/Niben261Chr05g0791009/Niben261Chr01g1304003/Niben261Chr03g0822039	19	0		19	Niben261Chr11g0759004/Niben261Chr19g1470004/Niben261Chr10g0373006/Niben261Chr11g0271006/Niben261Chr01g0363002/Niben261Chr12g0629011/Niben261Chr07g1363003/Niben261Chr02g0529012/Niben261Chr10g1026005/novel.5970/Niben261Chr10g0871014/Niben261Chr03g0424001/Niben261Chr18g0631005/Niben261Chr07g1363004/Niben261Chr18g1427010/Niben261Chr13g0326023/Niben261Chr05g0791009/Niben261Chr01g1304003/Niben261Chr03g…
BP	GO:0006950	response to stress	18/330	365/11266	0.0216952	0.212303	Niben261Chr18g0191012/Niben261Chr07g1479010/Niben261Scf00054g0000006/Niben261Chr09g1046007/Niben261Chr15g1414001/Niben261Chr12g0933008/Niben261Chr09g0801010/Niben261Chr04g1121014/Niben261Chr16g1253006/Niben261Chr17g0105004/Niben261Chr07g0430005/Niben261Chr10g0135007/Niben261Chr10g0130005/Niben261Chr10g0137007/Niben261Chr13g0657009/Niben261Chr11g1324008/Niben261Chr16g0336001/novel.6324	Niben261Chr18g0191012/Niben261Chr07g1479010/Niben261Scf00054g0000006/Niben261Chr09g1046007/Niben261Chr15g1414001/Niben261Chr12g0933008/Niben261Chr09g0801010/Niben261Chr04g1121014/Niben261Chr16g1253006/Niben261Chr17g0105004/Niben261Chr07g0430005/Niben261Chr10g0135007/Niben261Chr10g0130005/Niben261Chr10g0137007/Niben261Chr13g0657009/Niben261Chr11g1324008/Niben261Chr16g0336001/-	18	1	novel.6324	17	Niben261Chr18g0191012/Niben261Chr07g1479010/Niben261Scf00054g0000006/Niben261Chr09g1046007/Niben261Chr15g1414001/Niben261Chr12g0933008/Niben261Chr09g0801010/Niben261Chr04g1121014/Niben261Chr16g1253006/Niben261Chr17g0105004/Niben261Chr07g0430005/Niben261Chr10g0135007/Niben261Chr10g0130005/Niben261Chr10g0137007/Niben261Chr13g0657009/Niben261Chr11g1324008/Niben261Chr16g0336001
BP	GO:0009415	response to water	2/330	10/11266	0.0329531	0.31135	Niben261Chr07g1087016/Niben261Chr07g1087006	Niben261Chr07g1087016/Niben261Chr07g1087006	2	0		2	Niben261Chr07g1087016/Niben261Chr07g1087006
BP	GO:0009605	response to external stimulus	2/330	12/11266	0.0465111	0.424802	Niben261Scf00054g0000006/Niben261Chr09g1046007	Niben261Scf00054g0000006/Niben261Chr09g1046007	2	0		2	Niben261Scf00054g0000006/Niben261Chr09g1046007
BP	GO:0031124	mRNA 3'-end processing	2/330	13/11266	0.0539268	0.461748	Niben261Chr19g0052005/Niben261Chr12g0679012	Niben261Chr19g0052005/Niben261Chr12g0679012	2	0		2	Niben261Chr19g0052005/Niben261Chr12g0679012
BP	GO:0043631	RNA polyadenylation	2/330	13/11266	0.0539268	0.461748	Niben261Chr19g0052005/Niben261Chr12g0679012	Niben261Chr19g0052005/Niben261Chr12g0679012	2	0		2	Niben261Chr19g0052005/Niben261Chr12g0679012
BP	GO:0005976	polysaccharide metabolic process	7/330	123/11266	0.0694798	0.576892	Niben261Chr18g0368002/Niben261Chr09g0698013/Niben261Chr06g1186001/Niben261Chr15g0447003/Niben261Chr05g1071005/Niben261Chr12g0528019/Niben261Chr01g0194003	Niben261Chr18g0368002/Niben261Chr09g0698013/Niben261Chr06g1186001/Niben261Chr15g0447003/Niben261Chr05g1071005/Niben261Chr12g0528019/Niben261Chr01g0194003	7	1	Niben261Chr12g0528019	6	Niben261Chr18g0368002/Niben261Chr09g0698013/Niben261Chr06g1186001/Niben261Chr15g0447003/Niben261Chr05g1071005/Niben261Chr01g0194003
BP	GO:0042221	response to chemical	10/330	204/11266	0.0773265	0.605032	Niben261Chr07g1087016/Niben261Chr02g0493015/Niben261Chr17g1494009/Niben261Chr06g0606002/Niben261Chr12g1406001/Niben261Chr05g1117003/Niben261Chr12g1315020/Niben261Chr07g1087006/Niben261Chr08g0276003/Niben261Chr15g0408008	Niben261Chr07g1087016/Niben261Chr02g0493015/Niben261Chr17g1494009/Niben261Chr06g0606002/Niben261Chr12g1406001/Niben261Chr05g1117003/Niben261Chr12g1315020/Niben261Chr07g1087006/Niben261Chr08g0276003/Niben261Chr15g0408008	10	4	Niben261Chr02g0493015/Niben261Chr17g1494009/Niben261Chr12g1315020/Niben261Chr15g0408008	6	Niben261Chr07g1087016/Niben261Chr06g0606002/Niben261Chr12g1406001/Niben261Chr05g1117003/Niben261Chr07g1087006/Niben261Chr08g0276003
BP	GO:0006073	cellular glucan metabolic process	6/330	103/11266	0.0817014	0.605032	Niben261Chr18g0368002/Niben261Chr09g0698013/Niben261Chr15g0447003/Niben261Chr05g1071005/Niben261Chr12g0528019/Niben261Chr01g0194003	Niben261Chr18g0368002/Niben261Chr09g0698013/Niben261Chr15g0447003/Niben261Chr05g1071005/Niben261Chr12g0528019/Niben261Chr01g0194003	6	1	Niben261Chr12g0528019	5	Niben261Chr18g0368002/Niben261Chr09g0698013/Niben261Chr15g0447003/Niben261Chr05g1071005/Niben261Chr01g0194003
BP	GO:0044042	glucan metabolic process	6/330	103/11266	0.0817014	0.605032	Niben261Chr18g0368002/Niben261Chr09g0698013/Niben261Chr15g0447003/Niben261Chr05g1071005/Niben261Chr12g0528019/Niben261Chr01g0194003	Niben261Chr18g0368002/Niben261Chr09g0698013/Niben261Chr15g0447003/Niben261Chr05g1071005/Niben261Chr12g0528019/Niben261Chr01g0194003	6	1	Niben261Chr12g0528019	5	Niben261Chr18g0368002/Niben261Chr09g0698013/Niben261Chr15g0447003/Niben261Chr05g1071005/Niben261Chr01g0194003
BP	GO:0044264	cellular polysaccharide metabolic process	6/330	103/11266	0.0817014	0.605032	Niben261Chr18g0368002/Niben261Chr09g0698013/Niben261Chr15g0447003/Niben261Chr05g1071005/Niben261Chr12g0528019/Niben261Chr01g0194003	Niben261Chr18g0368002/Niben261Chr09g0698013/Niben261Chr15g0447003/Niben261Chr05g1071005/Niben261Chr12g0528019/Niben261Chr01g0194003	6	1	Niben261Chr12g0528019	5	Niben261Chr18g0368002/Niben261Chr09g0698013/Niben261Chr15g0447003/Niben261Chr05g1071005/Niben261Chr01g0194003
BP	GO:0015698	inorganic anion transport	4/330	59/11266	0.0940229	0.677548	Niben261Chr17g0387001/Niben261Chr06g0606002/Niben261Chr05g0124003/Niben261Chr08g0276003	Niben261Chr17g0387001/Niben261Chr06g0606002/Niben261Chr05g0124003/Niben261Chr08g0276003	4	0		4	Niben261Chr17g0387001/Niben261Chr06g0606002/Niben261Chr05g0124003/Niben261Chr08g0276003
BP	GO:0006855	drug transmembrane transport	5/330	85/11266	0.103691	0.677548	Niben261Chr02g0493015/Niben261Chr17g1494009/Niben261Chr12g1406001/Niben261Chr05g1117003/Niben261Chr15g0408008	Niben261Chr02g0493015/Niben261Chr17g1494009/Niben261Chr12g1406001/Niben261Chr05g1117003/Niben261Chr15g0408008	5	3	Niben261Chr02g0493015/Niben261Chr17g1494009/Niben261Chr15g0408008	2	Niben261Chr12g1406001/Niben261Chr05g1117003
BP	GO:0015893	drug transport	5/330	85/11266	0.103691	0.677548	Niben261Chr02g0493015/Niben261Chr17g1494009/Niben261Chr12g1406001/Niben261Chr05g1117003/Niben261Chr15g0408008	Niben261Chr02g0493015/Niben261Chr17g1494009/Niben261Chr12g1406001/Niben261Chr05g1117003/Niben261Chr15g0408008	5	3	Niben261Chr02g0493015/Niben261Chr17g1494009/Niben261Chr15g0408008	2	Niben261Chr12g1406001/Niben261Chr05g1117003
BP	GO:0042493	response to drug	5/330	85/11266	0.103691	0.677548	Niben261Chr02g0493015/Niben261Chr17g1494009/Niben261Chr12g1406001/Niben261Chr05g1117003/Niben261Chr15g0408008	Niben261Chr02g0493015/Niben261Chr17g1494009/Niben261Chr12g1406001/Niben261Chr05g1117003/Niben261Chr15g0408008	5	3	Niben261Chr02g0493015/Niben261Chr17g1494009/Niben261Chr15g0408008	2	Niben261Chr12g1406001/Niben261Chr05g1117003
BP	GO:0071554	cell wall organization or biogenesis	6/330	110/11266	0.103858	0.677548	Niben261Chr07g1178010/Niben261Chr08g1237022/Niben261Chr18g1375009/Niben261Chr13g0010010/Niben261Chr15g1422003/Niben261Chr15g1259003	Niben261Chr07g1178010/Niben261Chr08g1237022/Niben261Chr18g1375009/Niben261Chr13g0010010/Niben261Chr15g1422003/Niben261Chr15g1259003	6	1	Niben261Chr08g1237022	5	Niben261Chr07g1178010/Niben261Chr18g1375009/Niben261Chr13g0010010/Niben261Chr15g1422003/Niben261Chr15g1259003
BP	GO:0009628	response to abiotic stimulus	2/330	21/11266	0.124822	0.795374	Niben261Chr07g1087016/Niben261Chr07g1087006	Niben261Chr07g1087016/Niben261Chr07g1087006	2	0		2	Niben261Chr07g1087016/Niben261Chr07g1087006
BP	GO:0031123	RNA 3'-end processing	2/330	22/11266	0.134765	0.824013	Niben261Chr19g0052005/Niben261Chr12g0679012	Niben261Chr19g0052005/Niben261Chr12g0679012	2	0		2	Niben261Chr19g0052005/Niben261Chr12g0679012
BP	GO:0006631	fatty acid metabolic process	4/330	68/11266	0.138115	0.824013	Niben261Chr09g0105009/Niben261Chr07g0077009/Niben261Chr04g0097017/Niben261Chr17g1320001	Niben261Chr09g0105009/Niben261Chr07g0077009/Niben261Chr04g0097017/Niben261Chr17g1320001	4	2	Niben261Chr04g0097017/Niben261Chr17g1320001	2	Niben261Chr09g0105009/Niben261Chr07g0077009
BP	GO:0006820	anion transport	5/330	94/11266	0.14147	0.824013	Niben261Chr17g0387001/Niben261Chr06g0606002/Niben261Chr05g0124003/Niben261Chr08g0276003/Niben261Chr14g0436005	Niben261Chr17g0387001/Niben261Chr06g0606002/Niben261Chr05g0124003/Niben261Chr08g0276003/Niben261Chr14g0436005	5	0		5	Niben261Chr17g0387001/Niben261Chr06g0606002/Niben261Chr05g0124003/Niben261Chr08g0276003/Niben261Chr14g0436005
BP	GO:0044262	cellular carbohydrate metabolic process	8/330	175/11266	0.142153	0.824013	Niben261Chr14g0000003/Niben261Chr18g0368002/Niben261Chr09g0698013/Niben261Chr15g0447003/Niben261Chr05g1071005/Niben261Chr12g0528019/Niben261Chr01g0194003/Niben261Scf00257g0000003	Niben261Chr14g0000003/Niben261Chr18g0368002/Niben261Chr09g0698013/Niben261Chr15g0447003/Niben261Chr05g1071005/Niben261Chr12g0528019/Niben261Chr01g0194003/Niben261Scf00257g0000003	8	1	Niben261Chr12g0528019	7	Niben261Chr14g0000003/Niben261Chr18g0368002/Niben261Chr09g0698013/Niben261Chr15g0447003/Niben261Chr05g1071005/Niben261Chr01g0194003/Niben261Scf00257g0000003
BP	GO:0006633	fatty acid biosynthetic process	3/330	45/11266	0.144353	0.824013	Niben261Chr09g0105009/Niben261Chr04g0097017/Niben261Chr17g1320001	Niben261Chr09g0105009/Niben261Chr04g0097017/Niben261Chr17g1320001	3	2	Niben261Chr04g0097017/Niben261Chr17g1320001	1	Niben261Chr09g0105009
BP	GO:0006979	response to oxidative stress	6/330	129/11266	0.177541	0.992778	Niben261Chr18g0191012/Niben261Chr07g1479010/Niben261Chr12g0933008/Niben261Chr09g0801010/Niben261Chr11g1324008/Niben261Chr16g0336001	Niben261Chr18g0191012/Niben261Chr07g1479010/Niben261Chr12g0933008/Niben261Chr09g0801010/Niben261Chr11g1324008/Niben261Chr16g0336001	6	0		6	Niben261Chr18g0191012/Niben261Chr07g1479010/Niben261Chr12g0933008/Niben261Chr09g0801010/Niben261Chr11g1324008/Niben261Chr16g0336001
BP	GO:0008272	sulfate transport	2/330	28/11266	0.197374	0.999754	Niben261Chr17g0387001/Niben261Chr05g0124003	Niben261Chr17g0387001/Niben261Chr05g0124003	2	0		2	Niben261Chr17g0387001/Niben261Chr05g0124003
BP	GO:0072348	sulfur compound transport	2/330	28/11266	0.197374	0.999754	Niben261Chr17g0387001/Niben261Chr05g0124003	Niben261Chr17g0387001/Niben261Chr05g0124003	2	0		2	Niben261Chr17g0387001/Niben261Chr05g0124003
BP	GO:0009057	macromolecule catabolic process	8/330	194/11266	0.209507	0.999754	Niben261Chr07g1178010/Niben261Chr08g1237022/Niben261Chr18g1375009/Niben261Chr06g1186001/Niben261Chr13g0010010/Niben261Chr15g1422003/Niben261Chr15g1259003/Niben261Chr11g1171006	Niben261Chr07g1178010/Niben261Chr08g1237022/Niben261Chr18g1375009/Niben261Chr06g1186001/Niben261Chr13g0010010/Niben261Chr15g1422003/Niben261Chr15g1259003/Niben261Chr11g1171006	8	2	Niben261Chr08g1237022/Niben261Chr11g1171006	6	Niben261Chr07g1178010/Niben261Chr18g1375009/Niben261Chr06g1186001/Niben261Chr13g0010010/Niben261Chr15g1422003/Niben261Chr15g1259003
BP	GO:0005992	trehalose biosynthetic process	2/330	32/11266	0.240781	0.999754	Niben261Chr14g0000003/Niben261Scf00257g0000003	Niben261Chr14g0000003/Niben261Scf00257g0000003	2	0		2	Niben261Chr14g0000003/Niben261Scf00257g0000003
BP	GO:1901565	organonitrogen compound catabolic process	7/330	178/11266	0.266915	0.999754	Niben261Chr07g1178010/Niben261Chr08g1237022/Niben261Chr18g1375009/Niben261Chr13g0010010/Niben261Chr15g1422003/Niben261Chr15g1259003/Niben261Chr11g1171006	Niben261Chr07g1178010/Niben261Chr08g1237022/Niben261Chr18g1375009/Niben261Chr13g0010010/Niben261Chr15g1422003/Niben261Chr15g1259003/Niben261Chr11g1171006	7	2	Niben261Chr08g1237022/Niben261Chr11g1171006	5	Niben261Chr07g1178010/Niben261Chr18g1375009/Niben261Chr13g0010010/Niben261Chr15g1422003/Niben261Chr15g1259003
BP	GO:0046351	disaccharide biosynthetic process	2/330	35/11266	0.273624	0.999754	Niben261Chr14g0000003/Niben261Scf00257g0000003	Niben261Chr14g0000003/Niben261Scf00257g0000003	2	0		2	Niben261Chr14g0000003/Niben261Scf00257g0000003
BP	GO:0000079	regulation of cyclin-dependent protein serine/threonine kinase activity	1/330	11/11266	0.279038	0.999754	Niben261Chr05g1037002	Niben261Chr05g1037002	1	1	Niben261Chr05g1037002	0
BP	GO:0001932	regulation of protein phosphorylation	1/330	11/11266	0.279038	0.999754	Niben261Chr05g1037002	Niben261Chr05g1037002	1	1	Niben261Chr05g1037002	0
BP	GO:0006749	glutathione metabolic process	1/330	11/11266	0.279038	0.999754	novel.4431	-	1	0		1	novel.4431
BP	GO:0042325	regulation of phosphorylation	1/330	11/11266	0.279038	0.999754	Niben261Chr05g1037002	Niben261Chr05g1037002	1	1	Niben261Chr05g1037002	0
BP	GO:0043549	regulation of kinase activity	1/330	11/11266	0.279038	0.999754	Niben261Chr05g1037002	Niben261Chr05g1037002	1	1	Niben261Chr05g1037002	0
BP	GO:0045859	regulation of protein kinase activity	1/330	11/11266	0.279038	0.999754	Niben261Chr05g1037002	Niben261Chr05g1037002	1	1	Niben261Chr05g1037002	0
BP	GO:0051338	regulation of transferase activity	1/330	11/11266	0.279038	0.999754	Niben261Chr05g1037002	Niben261Chr05g1037002	1	1	Niben261Chr05g1037002	0
BP	GO:0071900	regulation of protein serine/threonine kinase activity	1/330	11/11266	0.279038	0.999754	Niben261Chr05g1037002	Niben261Chr05g1037002	1	1	Niben261Chr05g1037002	0
BP	GO:1904029	regulation of cyclin-dependent protein kinase activity	1/330	11/11266	0.279038	0.999754	Niben261Chr05g1037002	Niben261Chr05g1037002	1	1	Niben261Chr05g1037002	0
BP	GO:0005991	trehalose metabolic process	2/330	36/11266	0.28457	0.999754	Niben261Chr14g0000003/Niben261Scf00257g0000003	Niben261Chr14g0000003/Niben261Scf00257g0000003	2	0		2	Niben261Chr14g0000003/Niben261Scf00257g0000003
BP	GO:0015696	ammonium transport	1/330	12/11266	0.300177	0.999754	Niben261Chr05g0827010	Niben261Chr05g0827010	1	0		1	Niben261Chr05g0827010
BP	GO:0015936	coenzyme A metabolic process	1/330	12/11266	0.300177	0.999754	Niben261Chr07g0828009	Niben261Chr07g0828009	1	0		1	Niben261Chr07g0828009
BP	GO:0009116	nucleoside metabolic process	2/330	38/11266	0.306406	0.999754	Niben261Chr06g0266004/Niben261Chr03g1589001	Niben261Chr06g0266004/Niben261Chr03g1589001	2	1	Niben261Chr06g0266004	1	Niben261Chr03g1589001
BP	GO:1901657	glycosyl compound metabolic process	2/330	38/11266	0.306406	0.999754	Niben261Chr06g0266004/Niben261Chr03g1589001	Niben261Chr06g0266004/Niben261Chr03g1589001	2	1	Niben261Chr06g0266004	1	Niben261Chr03g1589001
BP	GO:0032787	monocarboxylic acid metabolic process	6/330	164/11266	0.34884	0.999754	Niben261Chr09g0105009/Niben261Chr03g1555004/Niben261Chr10g1091006/Niben261Chr07g0077009/Niben261Chr04g0097017/Niben261Chr17g1320001	Niben261Chr09g0105009/Niben261Chr03g1555004/Niben261Chr10g1091006/Niben261Chr07g0077009/Niben261Chr04g0097017/Niben261Chr17g1320001	6	2	Niben261Chr04g0097017/Niben261Chr17g1320001	4	Niben261Chr09g0105009/Niben261Chr03g1555004/Niben261Chr10g1091006/Niben261Chr07g0077009
BP	GO:0009312	oligosaccharide biosynthetic process	2/330	43/11266	0.360305	0.999754	Niben261Chr14g0000003/Niben261Scf00257g0000003	Niben261Chr14g0000003/Niben261Scf00257g0000003	2	0		2	Niben261Chr14g0000003/Niben261Scf00257g0000003
BP	GO:0072330	monocarboxylic acid biosynthetic process	5/330	137/11266	0.373696	0.999754	Niben261Chr09g0105009/Niben261Chr03g1555004/Niben261Chr10g1091006/Niben261Chr04g0097017/Niben261Chr17g1320001	Niben261Chr09g0105009/Niben261Chr03g1555004/Niben261Chr10g1091006/Niben261Chr04g0097017/Niben261Chr17g1320001	5	2	Niben261Chr04g0097017/Niben261Chr17g1320001	3	Niben261Chr09g0105009/Niben261Chr03g1555004/Niben261Chr10g1091006
BP	GO:0016042	lipid catabolic process	1/330	16/11266	0.37873	0.999754	Niben261Chr07g0077009	Niben261Chr07g0077009	1	0		1	Niben261Chr07g0077009
BP	GO:0017144	drug metabolic process	8/330	236/11266	0.387903	0.999754	Niben261Chr07g1178010/Niben261Chr03g1555004/Niben261Chr08g1237022/Niben261Chr18g1375009/Niben261Chr13g0010010/Niben261Chr15g1422003/Niben261Chr15g1259003/Niben261Chr07g0438001	Niben261Chr07g1178010/Niben261Chr03g1555004/Niben261Chr08g1237022/Niben261Chr18g1375009/Niben261Chr13g0010010/Niben261Chr15g1422003/Niben261Chr15g1259003/Niben261Chr07g0438001	8	1	Niben261Chr08g1237022	7	Niben261Chr07g1178010/Niben261Chr03g1555004/Niben261Chr18g1375009/Niben261Chr13g0010010/Niben261Chr15g1422003/Niben261Chr15g1259003/Niben261Chr07g0438001
BP	GO:0006074	(1->3)-beta-D-glucan metabolic process	1/330	18/11266	0.414645	0.999754	Niben261Chr12g0528019	Niben261Chr12g0528019	1	1	Niben261Chr12g0528019	0
BP	GO:0006075	(1->3)-beta-D-glucan biosynthetic process	1/330	18/11266	0.414645	0.999754	Niben261Chr12g0528019	Niben261Chr12g0528019	1	1	Niben261Chr12g0528019	0
BP	GO:0000272	polysaccharide catabolic process	1/330	20/11266	0.448489	0.999754	Niben261Chr06g1186001	Niben261Chr06g1186001	1	0		1	Niben261Chr06g1186001
BP	GO:0016054	organic acid catabolic process	1/330	20/11266	0.448489	0.999754	Niben261Chr07g0077009	Niben261Chr07g0077009	1	0		1	Niben261Chr07g0077009
BP	GO:0033865	nucleoside bisphosphate metabolic process	1/330	20/11266	0.448489	0.999754	Niben261Chr07g0828009	Niben261Chr07g0828009	1	0		1	Niben261Chr07g0828009
BP	GO:0033875	ribonucleoside bisphosphate metabolic process	1/330	20/11266	0.448489	0.999754	Niben261Chr07g0828009	Niben261Chr07g0828009	1	0		1	Niben261Chr07g0828009
BP	GO:0034032	purine nucleoside bisphosphate metabolic process	1/330	20/11266	0.448489	0.999754	Niben261Chr07g0828009	Niben261Chr07g0828009	1	0		1	Niben261Chr07g0828009
BP	GO:0046395	carboxylic acid catabolic process	1/330	20/11266	0.448489	0.999754	Niben261Chr07g0077009	Niben261Chr07g0077009	1	0		1	Niben261Chr07g0077009
BP	GO:1901135	carbohydrate derivative metabolic process	12/330	386/11266	0.458396	0.999754	Niben261Chr07g1178010/Niben261Chr03g1555004/Niben261Chr08g1237022/Niben261Chr18g1375009/Niben261Chr13g0010010/Niben261Chr14g1157014/Niben261Chr15g1422003/Niben261Chr06g0266004/Niben261Chr07g0828009/Niben261Chr15g1259003/Niben261Chr07g0438001/Niben261Chr03g1589001	Niben261Chr07g1178010/Niben261Chr03g1555004/Niben261Chr08g1237022/Niben261Chr18g1375009/Niben261Chr13g0010010/Niben261Chr14g1157014/Niben261Chr15g1422003/Niben261Chr06g0266004/Niben261Chr07g0828009/Niben261Chr15g1259003/Niben261Chr07g0438001/Niben261Chr03g1589001	12	2	Niben261Chr08g1237022/Niben261Chr06g0266004	10	Niben261Chr07g1178010/Niben261Chr03g1555004/Niben261Chr18g1375009/Niben261Chr13g0010010/Niben261Chr14g1157014/Niben261Chr15g1422003/Niben261Chr07g0828009/Niben261Chr15g1259003/Niben261Chr07g0438001/Niben261Chr03g1589001
BP	GO:0015693	magnesium ion transport	1/330	22/11266	0.480383	0.999754	Niben261Chr17g0086012	Niben261Chr17g0086012	1	0		1	Niben261Chr17g0086012
BP	GO:0019220	regulation of phosphate metabolic process	1/330	22/11266	0.480383	0.999754	Niben261Chr05g1037002	Niben261Chr05g1037002	1	1	Niben261Chr05g1037002	0
BP	GO:0031399	regulation of protein modification process	1/330	22/11266	0.480383	0.999754	Niben261Chr05g1037002	Niben261Chr05g1037002	1	1	Niben261Chr05g1037002	0
BP	GO:0051174	regulation of phosphorus metabolic process	1/330	22/11266	0.480383	0.999754	Niben261Chr05g1037002	Niben261Chr05g1037002	1	1	Niben261Chr05g1037002	0
BP	GO:0070838	divalent metal ion transport	1/330	22/11266	0.480383	0.999754	Niben261Chr17g0086012	Niben261Chr17g0086012	1	0		1	Niben261Chr17g0086012
BP	GO:0072511	divalent inorganic cation transport	1/330	22/11266	0.480383	0.999754	Niben261Chr17g0086012	Niben261Chr17g0086012	1	0		1	Niben261Chr17g0086012
BP	GO:0006261	DNA-dependent DNA replication	1/330	23/11266	0.495633	0.999754	Niben261Chr03g0012007	Niben261Chr03g0012007	1	0		1	Niben261Chr03g0012007
BP	GO:0005984	disaccharide metabolic process	2/330	59/11266	0.51936	0.999754	Niben261Chr14g0000003/Niben261Scf00257g0000003	Niben261Chr14g0000003/Niben261Scf00257g0000003	2	0		2	Niben261Chr14g0000003/Niben261Scf00257g0000003
BP	GO:0006612	protein targeting to membrane	1/330	25/11266	0.524808	0.999754	Niben261Chr13g1364019	Niben261Chr13g1364019	1	0		1	Niben261Chr13g1364019
BP	GO:0006613	cotranslational protein targeting to membrane	1/330	25/11266	0.524808	0.999754	Niben261Chr13g1364019	Niben261Chr13g1364019	1	0		1	Niben261Chr13g1364019
BP	GO:0006614	SRP-dependent cotranslational protein targeting to membrane	1/330	25/11266	0.524808	0.999754	Niben261Chr13g1364019	Niben261Chr13g1364019	1	0		1	Niben261Chr13g1364019
BP	GO:0006913	nucleocytoplasmic transport	1/330	25/11266	0.524808	0.999754	Niben261Chr03g0901016	Niben261Chr03g0901016	1	0		1	Niben261Chr03g0901016
BP	GO:0045047	protein targeting to ER	1/330	25/11266	0.524808	0.999754	Niben261Chr13g1364019	Niben261Chr13g1364019	1	0		1	Niben261Chr13g1364019
BP	GO:0051169	nuclear transport	1/330	25/11266	0.524808	0.999754	Niben261Chr03g0901016	Niben261Chr03g0901016	1	0		1	Niben261Chr03g0901016
BP	GO:0072599	establishment of protein localization to endoplasmic reticulum	1/330	25/11266	0.524808	0.999754	Niben261Chr13g1364019	Niben261Chr13g1364019	1	0		1	Niben261Chr13g1364019
BP	GO:0034637	cellular carbohydrate biosynthetic process	3/330	96/11266	0.53708	0.999754	Niben261Chr14g0000003/Niben261Chr12g0528019/Niben261Scf00257g0000003	Niben261Chr14g0000003/Niben261Chr12g0528019/Niben261Scf00257g0000003	3	1	Niben261Chr12g0528019	2	Niben261Chr14g0000003/Niben261Scf00257g0000003
BP	GO:0072657	protein localization to membrane	1/330	26/11266	0.538758	0.999754	Niben261Chr13g1364019	Niben261Chr13g1364019	1	0		1	Niben261Chr13g1364019
BP	GO:0090150	establishment of protein localization to membrane	1/330	26/11266	0.538758	0.999754	Niben261Chr13g1364019	Niben261Chr13g1364019	1	0		1	Niben261Chr13g1364019
BP	GO:0044248	cellular catabolic process	9/330	307/11266	0.547098	0.999754	Niben261Chr07g1178010/Niben261Chr03g1555004/Niben261Chr08g1237022/Niben261Chr18g1375009/Niben261Chr13g0010010/Niben261Chr15g1422003/Niben261Chr15g1259003/Niben261Chr07g0077009/Niben261Chr11g1171006	Niben261Chr07g1178010/Niben261Chr03g1555004/Niben261Chr08g1237022/Niben261Chr18g1375009/Niben261Chr13g0010010/Niben261Chr15g1422003/Niben261Chr15g1259003/Niben261Chr07g0077009/Niben261Chr11g1171006	9	2	Niben261Chr08g1237022/Niben261Chr11g1171006	7	Niben261Chr07g1178010/Niben261Chr03g1555004/Niben261Chr18g1375009/Niben261Chr13g0010010/Niben261Chr15g1422003/Niben261Chr15g1259003/Niben261Chr07g0077009
BP	GO:1901575	organic substance catabolic process	10/330	342/11266	0.548118	0.999754	Niben261Chr07g1178010/Niben261Chr03g1555004/Niben261Chr08g1237022/Niben261Chr18g1375009/Niben261Chr06g1186001/Niben261Chr13g0010010/Niben261Chr15g1422003/Niben261Chr15g1259003/Niben261Chr07g0077009/Niben261Chr11g1171006	Niben261Chr07g1178010/Niben261Chr03g1555004/Niben261Chr08g1237022/Niben261Chr18g1375009/Niben261Chr06g1186001/Niben261Chr13g0010010/Niben261Chr15g1422003/Niben261Chr15g1259003/Niben261Chr07g0077009/Niben261Chr11g1171006	10	2	Niben261Chr08g1237022/Niben261Chr11g1171006	8	Niben261Chr07g1178010/Niben261Chr03g1555004/Niben261Chr18g1375009/Niben261Chr06g1186001/Niben261Chr13g0010010/Niben261Chr15g1422003/Niben261Chr15g1259003/Niben261Chr07g0077009
BP	GO:0006575	cellular modified amino acid metabolic process	1/330	27/11266	0.5523	0.999754	novel.4431	-	1	0		1	novel.4431
BP	GO:0044255	cellular lipid metabolic process	7/330	242/11266	0.567506	0.999754	Niben261Chr06g0401014/Niben261Chr09g0105009/Niben261Chr01g0076002/Niben261Chr17g1120002/Niben261Chr07g0077009/Niben261Chr04g0097017/Niben261Chr17g1320001	Niben261Chr06g0401014/Niben261Chr09g0105009/Niben261Chr01g0076002/Niben261Chr17g1120002/Niben261Chr07g0077009/Niben261Chr04g0097017/Niben261Chr17g1320001	7	2	Niben261Chr04g0097017/Niben261Chr17g1320001	5	Niben261Chr06g0401014/Niben261Chr09g0105009/Niben261Chr01g0076002/Niben261Chr17g1120002/Niben261Chr07g0077009
BP	GO:0009056	catabolic process	10/330	351/11266	0.581501	0.999754	Niben261Chr07g1178010/Niben261Chr03g1555004/Niben261Chr08g1237022/Niben261Chr18g1375009/Niben261Chr06g1186001/Niben261Chr13g0010010/Niben261Chr15g1422003/Niben261Chr15g1259003/Niben261Chr07g0077009/Niben261Chr11g1171006	Niben261Chr07g1178010/Niben261Chr03g1555004/Niben261Chr08g1237022/Niben261Chr18g1375009/Niben261Chr06g1186001/Niben261Chr13g0010010/Niben261Chr15g1422003/Niben261Chr15g1259003/Niben261Chr07g0077009/Niben261Chr11g1171006	10	2	Niben261Chr08g1237022/Niben261Chr11g1171006	8	Niben261Chr07g1178010/Niben261Chr03g1555004/Niben261Chr18g1375009/Niben261Chr06g1186001/Niben261Chr13g0010010/Niben261Chr15g1422003/Niben261Chr15g1259003/Niben261Chr07g0077009
BP	GO:0009311	oligosaccharide metabolic process	2/330	67/11266	0.588485	0.999754	Niben261Chr14g0000003/Niben261Scf00257g0000003	Niben261Chr14g0000003/Niben261Scf00257g0000003	2	0		2	Niben261Chr14g0000003/Niben261Scf00257g0000003
BP	GO:0007034	vacuolar transport	1/330	30/11266	0.590593	0.999754	Niben261Chr15g0982012	Niben261Chr15g0982012	1	1	Niben261Chr15g0982012	0
BP	GO:0006605	protein targeting	1/330	31/11266	0.602617	0.999754	Niben261Chr13g1364019	Niben261Chr13g1364019	1	0		1	Niben261Chr13g1364019
BP	GO:0032268	regulation of cellular protein metabolic process	1/330	31/11266	0.602617	0.999754	Niben261Chr05g1037002	Niben261Chr05g1037002	1	1	Niben261Chr05g1037002	0
BP	GO:0030258	lipid modification	1/330	32/11266	0.614289	0.999754	Niben261Chr07g0077009	Niben261Chr07g0077009	1	0		1	Niben261Chr07g0077009
BP	GO:0009067	aspartate family amino acid biosynthetic process	1/330	33/11266	0.625619	0.999754	Niben261Chr10g1091006	Niben261Chr10g1091006	1	0		1	Niben261Chr10g1091006
BP	GO:0016051	carbohydrate biosynthetic process	3/330	110/11266	0.629676	0.999754	Niben261Chr14g0000003/Niben261Chr12g0528019/Niben261Scf00257g0000003	Niben261Chr14g0000003/Niben261Chr12g0528019/Niben261Scf00257g0000003	3	1	Niben261Chr12g0528019	2	Niben261Chr14g0000003/Niben261Scf00257g0000003
BP	GO:0044282	small molecule catabolic process	1/330	34/11266	0.636618	0.999754	Niben261Chr07g0077009	Niben261Chr07g0077009	1	0		1	Niben261Chr07g0077009
BP	GO:0051246	regulation of protein metabolic process	1/330	34/11266	0.636618	0.999754	Niben261Chr05g1037002	Niben261Chr05g1037002	1	1	Niben261Chr05g1037002	0
BP	GO:0008299	isoprenoid biosynthetic process	1/330	36/11266	0.657658	0.999754	Niben261Chr06g0401014	Niben261Chr06g0401014	1	0		1	Niben261Chr06g0401014
BP	GO:0050790	regulation of catalytic activity	1/330	36/11266	0.657658	0.999754	Niben261Chr05g1037002	Niben261Chr05g1037002	1	1	Niben261Chr05g1037002	0
BP	GO:0065009	regulation of molecular function	1/330	36/11266	0.657658	0.999754	Niben261Chr05g1037002	Niben261Chr05g1037002	1	1	Niben261Chr05g1037002	0
BP	GO:0009066	aspartate family amino acid metabolic process	1/330	37/11266	0.667717	0.999754	Niben261Chr10g1091006	Niben261Chr10g1091006	1	0		1	Niben261Chr10g1091006
BP	GO:0051726	regulation of cell cycle	1/330	38/11266	0.677483	0.999754	Niben261Chr05g1037002	Niben261Chr05g1037002	1	1	Niben261Chr05g1037002	0
BP	GO:0006812	cation transport	11/330	417/11266	0.682416	0.999754	Niben261Chr05g0536007/Niben261Chr05g0827010/Niben261Chr17g0086012/Niben261Chr05g1366011/Niben261Chr12g0287027/Niben261Chr02g0419002/Niben261Chr14g0756002/novel.1814/novel.2065/Niben261Chr07g0438001/Niben261Chr03g1138002	Niben261Chr05g0536007/Niben261Chr05g0827010/Niben261Chr17g0086012/Niben261Chr05g1366011/Niben261Chr12g0287027/Niben261Chr02g0419002/Niben261Chr14g0756002/-/-/Niben261Chr07g0438001/Niben261Chr03g1138002	11	2	Niben261Chr02g0419002/Niben261Chr03g1138002	9	Niben261Chr05g0536007/Niben261Chr05g0827010/Niben261Chr17g0086012/Niben261Chr05g1366011/Niben261Chr12g0287027/Niben261Chr14g0756002/novel.1814/novel.2065/Niben261Chr07g0438001
BP	GO:0006720	isoprenoid metabolic process	1/330	39/11266	0.686962	0.999754	Niben261Chr06g0401014	Niben261Chr06g0401014	1	0		1	Niben261Chr06g0401014
BP	GO:0070972	protein localization to endoplasmic reticulum	1/330	39/11266	0.686962	0.999754	Niben261Chr13g1364019	Niben261Chr13g1364019	1	0		1	Niben261Chr13g1364019
BP	GO:0072594	establishment of protein localization to organelle	1/330	39/11266	0.686962	0.999754	Niben261Chr13g1364019	Niben261Chr13g1364019	1	0		1	Niben261Chr13g1364019
BP	GO:0006629	lipid metabolic process	13/330	498/11266	0.705496	0.999754	Niben261Chr16g0225013/Niben261Chr06g0401014/Niben261Chr09g0105009/Niben261Chr01g0076002/Niben261Chr01g1268002/Niben261Chr15g1178009/Niben261Chr17g1120002/Niben261Chr06g0386017/Niben261Chr07g0077009/Niben261Chr07g1286021/Niben261Chr04g0097017/Niben261Chr17g1320001/Niben261Chr15g0431001	Niben261Chr16g0225013/Niben261Chr06g0401014/Niben261Chr09g0105009/Niben261Chr01g0076002/Niben261Chr01g1268002/Niben261Chr15g1178009/Niben261Chr17g1120002/Niben261Chr06g0386017/Niben261Chr07g0077009/Niben261Chr07g1286021/Niben261Chr04g0097017/Niben261Chr17g1320001/Niben261Chr15g0431001	13	2	Niben261Chr04g0097017/Niben261Chr17g1320001	11	Niben261Chr16g0225013/Niben261Chr06g0401014/Niben261Chr09g0105009/Niben261Chr01g0076002/Niben261Chr01g1268002/Niben261Chr15g1178009/Niben261Chr17g1120002/Niben261Chr06g0386017/Niben261Chr07g0077009/Niben261Chr07g1286021/Niben261Chr15g0431001
BP	GO:0045017	glycerolipid biosynthetic process	1/330	42/11266	0.713764	0.999754	Niben261Chr01g0076002	Niben261Chr01g0076002	1	0		1	Niben261Chr01g0076002
BP	GO:0046486	glycerolipid metabolic process	2/330	87/11266	0.728247	0.999754	Niben261Chr01g0076002/Niben261Chr17g1120002	Niben261Chr01g0076002/Niben261Chr17g1120002	2	0		2	Niben261Chr01g0076002/Niben261Chr17g1120002
BP	GO:0008610	lipid biosynthetic process	5/330	207/11266	0.729849	0.999754	Niben261Chr06g0401014/Niben261Chr09g0105009/Niben261Chr01g0076002/Niben261Chr04g0097017/Niben261Chr17g1320001	Niben261Chr06g0401014/Niben261Chr09g0105009/Niben261Chr01g0076002/Niben261Chr04g0097017/Niben261Chr17g1320001	5	2	Niben261Chr04g0097017/Niben261Chr17g1320001	3	Niben261Chr06g0401014/Niben261Chr09g0105009/Niben261Chr01g0076002
BP	GO:0006397	mRNA processing	2/330	88/11266	0.734052	0.999754	Niben261Chr19g0052005/Niben261Chr12g0679012	Niben261Chr19g0052005/Niben261Chr12g0679012	2	0		2	Niben261Chr19g0052005/Niben261Chr12g0679012
BP	GO:0006887	exocytosis	1/330	51/11266	0.781204	0.999754	Niben261Chr08g0196018	Niben261Chr08g0196018	1	0		1	Niben261Chr08g0196018
BP	GO:0032940	secretion by cell	1/330	51/11266	0.781204	0.999754	Niben261Chr08g0196018	Niben261Chr08g0196018	1	0		1	Niben261Chr08g0196018
BP	GO:0015985	energy coupled proton transport, down electrochemical gradient	1/330	54/11266	0.799957	0.999754	Niben261Chr07g0438001	Niben261Chr07g0438001	1	0		1	Niben261Chr07g0438001
BP	GO:0015986	ATP synthesis coupled proton transport	1/330	54/11266	0.799957	0.999754	Niben261Chr07g0438001	Niben261Chr07g0438001	1	0		1	Niben261Chr07g0438001
BP	GO:0033365	protein localization to organelle	1/330	54/11266	0.799957	0.999754	Niben261Chr13g1364019	Niben261Chr13g1364019	1	0		1	Niben261Chr13g1364019
BP	GO:0046903	secretion	1/330	55/11266	0.805845	0.999754	Niben261Chr08g0196018	Niben261Chr08g0196018	1	0		1	Niben261Chr08g0196018
BP	GO:0016071	mRNA metabolic process	2/330	105/11266	0.817586	0.999754	Niben261Chr19g0052005/Niben261Chr12g0679012	Niben261Chr19g0052005/Niben261Chr12g0679012	2	0		2	Niben261Chr19g0052005/Niben261Chr12g0679012
BP	GO:0000271	polysaccharide biosynthetic process	1/330	58/11266	0.822492	0.999754	Niben261Chr12g0528019	Niben261Chr12g0528019	1	1	Niben261Chr12g0528019	0
BP	GO:0006352	DNA-templated transcription, initiation	1/330	58/11266	0.822492	0.999754	Niben261Scf03563g0000002	Niben261Scf03563g0000002	1	0		1	Niben261Scf03563g0000002
BP	GO:0009250	glucan biosynthetic process	1/330	58/11266	0.822492	0.999754	Niben261Chr12g0528019	Niben261Chr12g0528019	1	1	Niben261Chr12g0528019	0
BP	GO:0033692	cellular polysaccharide biosynthetic process	1/330	58/11266	0.822492	0.999754	Niben261Chr12g0528019	Niben261Chr12g0528019	1	1	Niben261Chr12g0528019	0
BP	GO:0051273	beta-glucan metabolic process	1/330	58/11266	0.822492	0.999754	Niben261Chr12g0528019	Niben261Chr12g0528019	1	1	Niben261Chr12g0528019	0
BP	GO:0051274	beta-glucan biosynthetic process	1/330	58/11266	0.822492	0.999754	Niben261Chr12g0528019	Niben261Chr12g0528019	1	1	Niben261Chr12g0528019	0
BP	GO:0016052	carbohydrate catabolic process	2/330	107/11266	0.825696	0.999754	Niben261Chr03g1555004/Niben261Chr06g1186001	Niben261Chr03g1555004/Niben261Chr06g1186001	2	0		2	Niben261Chr03g1555004/Niben261Chr06g1186001
BP	GO:0009733	response to auxin	1/330	59/11266	0.827718	0.999754	Niben261Chr12g1315020	Niben261Chr12g1315020	1	1	Niben261Chr12g1315020	0
BP	GO:0016053	organic acid biosynthetic process	5/330	240/11266	0.836672	0.999754	Niben261Chr09g0105009/Niben261Chr03g1555004/Niben261Chr10g1091006/Niben261Chr04g0097017/Niben261Chr17g1320001	Niben261Chr09g0105009/Niben261Chr03g1555004/Niben261Chr10g1091006/Niben261Chr04g0097017/Niben261Chr17g1320001	5	2	Niben261Chr04g0097017/Niben261Chr17g1320001	3	Niben261Chr09g0105009/Niben261Chr03g1555004/Niben261Chr10g1091006
BP	GO:0046394	carboxylic acid biosynthetic process	5/330	240/11266	0.836672	0.999754	Niben261Chr09g0105009/Niben261Chr03g1555004/Niben261Chr10g1091006/Niben261Chr04g0097017/Niben261Chr17g1320001	Niben261Chr09g0105009/Niben261Chr03g1555004/Niben261Chr10g1091006/Niben261Chr04g0097017/Niben261Chr17g1320001	5	2	Niben261Chr04g0097017/Niben261Chr17g1320001	3	Niben261Chr09g0105009/Niben261Chr03g1555004/Niben261Chr10g1091006
BP	GO:0030001	metal ion transport	4/330	200/11266	0.842166	0.999754	Niben261Chr17g0086012/novel.1814/novel.2065/Niben261Chr03g1138002	Niben261Chr17g0086012/-/-/Niben261Chr03g1138002	4	1	Niben261Chr03g1138002	3	Niben261Chr17g0086012/novel.1814/novel.2065
BP	GO:0007049	cell cycle	1/330	63/11266	0.847134	0.999754	Niben261Chr05g1037002	Niben261Chr05g1037002	1	1	Niben261Chr05g1037002	0
BP	GO:0046488	phosphatidylinositol metabolic process	1/330	71/11266	0.879663	0.999754	Niben261Chr17g1120002	Niben261Chr17g1120002	1	0		1	Niben261Chr17g1120002
BP	GO:0071705	nitrogen compound transport	6/330	310/11266	0.895897	0.999754	Niben261Chr05g0827010/Niben261Chr03g1302010/Niben261Chr19g1427018/Niben261Chr06g0606002/Niben261Chr13g1364019/Niben261Chr08g0276003	Niben261Chr05g0827010/Niben261Chr03g1302010/Niben261Chr19g1427018/Niben261Chr06g0606002/Niben261Chr13g1364019/Niben261Chr08g0276003	6	0		6	Niben261Chr05g0827010/Niben261Chr03g1302010/Niben261Chr19g1427018/Niben261Chr06g0606002/Niben261Chr13g1364019/Niben261Chr08g0276003
BP	GO:0006650	glycerophospholipid metabolic process	1/330	77/11266	0.899442	0.999754	Niben261Chr17g1120002	Niben261Chr17g1120002	1	0		1	Niben261Chr17g1120002
BP	GO:0009150	purine ribonucleotide metabolic process	3/330	180/11266	0.901778	0.999754	Niben261Chr03g1555004/Niben261Chr07g0828009/Niben261Chr07g0438001	Niben261Chr03g1555004/Niben261Chr07g0828009/Niben261Chr07g0438001	3	0		3	Niben261Chr03g1555004/Niben261Chr07g0828009/Niben261Chr07g0438001
BP	GO:0009259	ribonucleotide metabolic process	3/330	180/11266	0.901778	0.999754	Niben261Chr03g1555004/Niben261Chr07g0828009/Niben261Chr07g0438001	Niben261Chr03g1555004/Niben261Chr07g0828009/Niben261Chr07g0438001	3	0		3	Niben261Chr03g1555004/Niben261Chr07g0828009/Niben261Chr07g0438001
BP	GO:0006096	glycolytic process	1/330	78/11266	0.902408	0.999754	Niben261Chr03g1555004	Niben261Chr03g1555004	1	0		1	Niben261Chr03g1555004
BP	GO:0006165	nucleoside diphosphate phosphorylation	1/330	78/11266	0.902408	0.999754	Niben261Chr03g1555004	Niben261Chr03g1555004	1	0		1	Niben261Chr03g1555004
BP	GO:0006757	ATP generation from ADP	1/330	78/11266	0.902408	0.999754	Niben261Chr03g1555004	Niben261Chr03g1555004	1	0		1	Niben261Chr03g1555004
BP	GO:0009132	nucleoside diphosphate metabolic process	1/330	78/11266	0.902408	0.999754	Niben261Chr03g1555004	Niben261Chr03g1555004	1	0		1	Niben261Chr03g1555004
BP	GO:0009135	purine nucleoside diphosphate metabolic process	1/330	78/11266	0.902408	0.999754	Niben261Chr03g1555004	Niben261Chr03g1555004	1	0		1	Niben261Chr03g1555004
BP	GO:0009179	purine ribonucleoside diphosphate metabolic process	1/330	78/11266	0.902408	0.999754	Niben261Chr03g1555004	Niben261Chr03g1555004	1	0		1	Niben261Chr03g1555004
BP	GO:0009185	ribonucleoside diphosphate metabolic process	1/330	78/11266	0.902408	0.999754	Niben261Chr03g1555004	Niben261Chr03g1555004	1	0		1	Niben261Chr03g1555004
BP	GO:0042866	pyruvate biosynthetic process	1/330	78/11266	0.902408	0.999754	Niben261Chr03g1555004	Niben261Chr03g1555004	1	0		1	Niben261Chr03g1555004
BP	GO:0046031	ADP metabolic process	1/330	78/11266	0.902408	0.999754	Niben261Chr03g1555004	Niben261Chr03g1555004	1	0		1	Niben261Chr03g1555004
BP	GO:0046939	nucleotide phosphorylation	1/330	78/11266	0.902408	0.999754	Niben261Chr03g1555004	Niben261Chr03g1555004	1	0		1	Niben261Chr03g1555004
BP	GO:0055086	nucleobase-containing small molecule metabolic process	5/330	271/11266	0.90296	0.999754	Niben261Chr03g1555004/Niben261Chr06g0266004/Niben261Chr07g0828009/Niben261Chr07g0438001/Niben261Chr03g1589001	Niben261Chr03g1555004/Niben261Chr06g0266004/Niben261Chr07g0828009/Niben261Chr07g0438001/Niben261Chr03g1589001	5	1	Niben261Chr06g0266004	4	Niben261Chr03g1555004/Niben261Chr07g0828009/Niben261Chr07g0438001/Niben261Chr03g1589001
BP	GO:1901607	alpha-amino acid biosynthetic process	1/330	79/11266	0.905287	0.999754	Niben261Chr10g1091006	Niben261Chr10g1091006	1	0		1	Niben261Chr10g1091006
BP	GO:0019752	carboxylic acid metabolic process	9/330	442/11266	0.905698	0.999754	Niben261Chr09g0105009/Niben261Chr03g1555004/Niben261Chr18g0684004/Niben261Chr08g0323012/Niben261Chr10g1091006/Niben261Chr07g0077009/Niben261Chr04g0097017/Niben261Chr17g1320001/Niben261Chr01g1065004	Niben261Chr09g0105009/Niben261Chr03g1555004/Niben261Chr18g0684004/Niben261Chr08g0323012/Niben261Chr10g1091006/Niben261Chr07g0077009/Niben261Chr04g0097017/Niben261Chr17g1320001/Niben261Chr01g1065004	9	2	Niben261Chr04g0097017/Niben261Chr17g1320001	7	Niben261Chr09g0105009/Niben261Chr03g1555004/Niben261Chr18g0684004/Niben261Chr08g0323012/Niben261Chr10g1091006/Niben261Chr07g0077009/Niben261Chr01g1065004
BP	GO:0009166	nucleotide catabolic process	1/330	80/11266	0.908081	0.999754	Niben261Chr03g1555004	Niben261Chr03g1555004	1	0		1	Niben261Chr03g1555004
BP	GO:0006754	ATP biosynthetic process	2/330	135/11266	0.909634	0.999754	Niben261Chr03g1555004/Niben261Chr07g0438001	Niben261Chr03g1555004/Niben261Chr07g0438001	2	0		2	Niben261Chr03g1555004/Niben261Chr07g0438001
BP	GO:0009142	nucleoside triphosphate biosynthetic process	2/330	135/11266	0.909634	0.999754	Niben261Chr03g1555004/Niben261Chr07g0438001	Niben261Chr03g1555004/Niben261Chr07g0438001	2	0		2	Niben261Chr03g1555004/Niben261Chr07g0438001
BP	GO:0009145	purine nucleoside triphosphate biosynthetic process	2/330	135/11266	0.909634	0.999754	Niben261Chr03g1555004/Niben261Chr07g0438001	Niben261Chr03g1555004/Niben261Chr07g0438001	2	0		2	Niben261Chr03g1555004/Niben261Chr07g0438001
BP	GO:0009201	ribonucleoside triphosphate biosynthetic process	2/330	135/11266	0.909634	0.999754	Niben261Chr03g1555004/Niben261Chr07g0438001	Niben261Chr03g1555004/Niben261Chr07g0438001	2	0		2	Niben261Chr03g1555004/Niben261Chr07g0438001
BP	GO:0009206	purine ribonucleoside triphosphate biosynthetic process	2/330	135/11266	0.909634	0.999754	Niben261Chr03g1555004/Niben261Chr07g0438001	Niben261Chr03g1555004/Niben261Chr07g0438001	2	0		2	Niben261Chr03g1555004/Niben261Chr07g0438001
BP	GO:0006090	pyruvate metabolic process	1/330	81/11266	0.910792	0.999754	Niben261Chr03g1555004	Niben261Chr03g1555004	1	0		1	Niben261Chr03g1555004
BP	GO:0006260	DNA replication	1/330	81/11266	0.910792	0.999754	Niben261Chr03g0012007	Niben261Chr03g0012007	1	0		1	Niben261Chr03g0012007
BP	GO:0043436	oxoacid metabolic process	9/330	446/11266	0.910907	0.999754	Niben261Chr09g0105009/Niben261Chr03g1555004/Niben261Chr18g0684004/Niben261Chr08g0323012/Niben261Chr10g1091006/Niben261Chr07g0077009/Niben261Chr04g0097017/Niben261Chr17g1320001/Niben261Chr01g1065004	Niben261Chr09g0105009/Niben261Chr03g1555004/Niben261Chr18g0684004/Niben261Chr08g0323012/Niben261Chr10g1091006/Niben261Chr07g0077009/Niben261Chr04g0097017/Niben261Chr17g1320001/Niben261Chr01g1065004	9	2	Niben261Chr04g0097017/Niben261Chr17g1320001	7	Niben261Chr09g0105009/Niben261Chr03g1555004/Niben261Chr18g0684004/Niben261Chr08g0323012/Niben261Chr10g1091006/Niben261Chr07g0077009/Niben261Chr01g1065004
BP	GO:0006082	organic acid metabolic process	9/330	449/11266	0.914653	0.999754	Niben261Chr09g0105009/Niben261Chr03g1555004/Niben261Chr18g0684004/Niben261Chr08g0323012/Niben261Chr10g1091006/Niben261Chr07g0077009/Niben261Chr04g0097017/Niben261Chr17g1320001/Niben261Chr01g1065004	Niben261Chr09g0105009/Niben261Chr03g1555004/Niben261Chr18g0684004/Niben261Chr08g0323012/Niben261Chr10g1091006/Niben261Chr07g0077009/Niben261Chr04g0097017/Niben261Chr17g1320001/Niben261Chr01g1065004	9	2	Niben261Chr04g0097017/Niben261Chr17g1320001	7	Niben261Chr09g0105009/Niben261Chr03g1555004/Niben261Chr18g0684004/Niben261Chr08g0323012/Niben261Chr10g1091006/Niben261Chr07g0077009/Niben261Chr01g1065004
BP	GO:0006163	purine nucleotide metabolic process	3/330	188/11266	0.91699	0.999754	Niben261Chr03g1555004/Niben261Chr07g0828009/Niben261Chr07g0438001	Niben261Chr03g1555004/Niben261Chr07g0828009/Niben261Chr07g0438001	3	0		3	Niben261Chr03g1555004/Niben261Chr07g0828009/Niben261Chr07g0438001
BP	GO:0000160	phosphorelay signal transduction system	1/330	85/11266	0.920865	0.999754	Niben261Chr05g0791009	Niben261Chr05g0791009	1	0		1	Niben261Chr05g0791009
BP	GO:0009124	nucleoside monophosphate biosynthetic process	2/330	141/11266	0.921833	0.999754	Niben261Chr03g1555004/Niben261Chr07g0438001	Niben261Chr03g1555004/Niben261Chr07g0438001	2	0		2	Niben261Chr03g1555004/Niben261Chr07g0438001
BP	GO:0009127	purine nucleoside monophosphate biosynthetic process	2/330	141/11266	0.921833	0.999754	Niben261Chr03g1555004/Niben261Chr07g0438001	Niben261Chr03g1555004/Niben261Chr07g0438001	2	0		2	Niben261Chr03g1555004/Niben261Chr07g0438001
BP	GO:0009156	ribonucleoside monophosphate biosynthetic process	2/330	141/11266	0.921833	0.999754	Niben261Chr03g1555004/Niben261Chr07g0438001	Niben261Chr03g1555004/Niben261Chr07g0438001	2	0		2	Niben261Chr03g1555004/Niben261Chr07g0438001
BP	GO:0009168	purine ribonucleoside monophosphate biosynthetic process	2/330	141/11266	0.921833	0.999754	Niben261Chr03g1555004/Niben261Chr07g0438001	Niben261Chr03g1555004/Niben261Chr07g0438001	2	0		2	Niben261Chr03g1555004/Niben261Chr07g0438001
BP	GO:0006790	sulfur compound metabolic process	1/330	86/11266	0.9232	0.999754	novel.4431	-	1	0		1	novel.4431
BP	GO:0072521	purine-containing compound metabolic process	3/330	192/11266	0.923764	0.999754	Niben261Chr03g1555004/Niben261Chr07g0828009/Niben261Chr07g0438001	Niben261Chr03g1555004/Niben261Chr07g0828009/Niben261Chr07g0438001	3	0		3	Niben261Chr03g1555004/Niben261Chr07g0828009/Niben261Chr07g0438001
BP	GO:0019693	ribose phosphate metabolic process	3/330	193/11266	0.925377	0.999754	Niben261Chr03g1555004/Niben261Chr07g0828009/Niben261Chr07g0438001	Niben261Chr03g1555004/Niben261Chr07g0828009/Niben261Chr07g0438001	3	0		3	Niben261Chr03g1555004/Niben261Chr07g0828009/Niben261Chr07g0438001
BP	GO:1901292	nucleoside phosphate catabolic process	1/330	88/11266	0.927667	0.999754	Niben261Chr03g1555004	Niben261Chr03g1555004	1	0		1	Niben261Chr03g1555004
BP	GO:0044283	small molecule biosynthetic process	5/330	288/11266	0.928291	0.999754	Niben261Chr09g0105009/Niben261Chr03g1555004/Niben261Chr10g1091006/Niben261Chr04g0097017/Niben261Chr17g1320001	Niben261Chr09g0105009/Niben261Chr03g1555004/Niben261Chr10g1091006/Niben261Chr04g0097017/Niben261Chr17g1320001	5	2	Niben261Chr04g0097017/Niben261Chr17g1320001	3	Niben261Chr09g0105009/Niben261Chr03g1555004/Niben261Chr10g1091006
BP	GO:0034404	nucleobase-containing small molecule biosynthetic process	1/330	90/11266	0.931875	0.999754	Niben261Chr03g1555004	Niben261Chr03g1555004	1	0		1	Niben261Chr03g1555004
BP	GO:0009152	purine ribonucleotide biosynthetic process	2/330	147/11266	0.932472	0.999754	Niben261Chr03g1555004/Niben261Chr07g0438001	Niben261Chr03g1555004/Niben261Chr07g0438001	2	0		2	Niben261Chr03g1555004/Niben261Chr07g0438001
BP	GO:0009260	ribonucleotide biosynthetic process	2/330	147/11266	0.932472	0.999754	Niben261Chr03g1555004/Niben261Chr07g0438001	Niben261Chr03g1555004/Niben261Chr07g0438001	2	0		2	Niben261Chr03g1555004/Niben261Chr07g0438001
BP	GO:0046390	ribose phosphate biosynthetic process	2/330	147/11266	0.932472	0.999754	Niben261Chr03g1555004/Niben261Chr07g0438001	Niben261Chr03g1555004/Niben261Chr07g0438001	2	0		2	Niben261Chr03g1555004/Niben261Chr07g0438001
BP	GO:0019725	cellular homeostasis	2/330	149/11266	0.935703	0.999754	Niben261Chr14g0762005/Niben261Chr04g1079002	Niben261Chr14g0762005/Niben261Chr04g1079002	2	0		2	Niben261Chr14g0762005/Niben261Chr04g1079002
BP	GO:0006486	protein glycosylation	1/330	93/11266	0.937734	0.999754	Niben261Chr14g1157014	Niben261Chr14g1157014	1	0		1	Niben261Chr14g1157014
BP	GO:0009100	glycoprotein metabolic process	1/330	93/11266	0.937734	0.999754	Niben261Chr14g1157014	Niben261Chr14g1157014	1	0		1	Niben261Chr14g1157014
BP	GO:0009101	glycoprotein biosynthetic process	1/330	93/11266	0.937734	0.999754	Niben261Chr14g1157014	Niben261Chr14g1157014	1	0		1	Niben261Chr14g1157014
BP	GO:0043413	macromolecule glycosylation	1/330	93/11266	0.937734	0.999754	Niben261Chr14g1157014	Niben261Chr14g1157014	1	0		1	Niben261Chr14g1157014
BP	GO:0046034	ATP metabolic process	2/330	152/11266	0.940278	0.999754	Niben261Chr03g1555004/Niben261Chr07g0438001	Niben261Chr03g1555004/Niben261Chr07g0438001	2	0		2	Niben261Chr03g1555004/Niben261Chr07g0438001
BP	GO:0019359	nicotinamide nucleotide biosynthetic process	1/330	95/11266	0.941358	0.999754	Niben261Chr03g1555004	Niben261Chr03g1555004	1	0		1	Niben261Chr03g1555004
BP	GO:0019363	pyridine nucleotide biosynthetic process	1/330	95/11266	0.941358	0.999754	Niben261Chr03g1555004	Niben261Chr03g1555004	1	0		1	Niben261Chr03g1555004
BP	GO:0046434	organophosphate catabolic process	1/330	95/11266	0.941358	0.999754	Niben261Chr03g1555004	Niben261Chr03g1555004	1	0		1	Niben261Chr03g1555004
BP	GO:0009144	purine nucleoside triphosphate metabolic process	2/330	154/11266	0.943154	0.999754	Niben261Chr03g1555004/Niben261Chr07g0438001	Niben261Chr03g1555004/Niben261Chr07g0438001	2	0		2	Niben261Chr03g1555004/Niben261Chr07g0438001
BP	GO:0009199	ribonucleoside triphosphate metabolic process	2/330	154/11266	0.943154	0.999754	Niben261Chr03g1555004/Niben261Chr07g0438001	Niben261Chr03g1555004/Niben261Chr07g0438001	2	0		2	Niben261Chr03g1555004/Niben261Chr07g0438001
BP	GO:0009205	purine ribonucleoside triphosphate metabolic process	2/330	154/11266	0.943154	0.999754	Niben261Chr03g1555004/Niben261Chr07g0438001	Niben261Chr03g1555004/Niben261Chr07g0438001	2	0		2	Niben261Chr03g1555004/Niben261Chr07g0438001
BP	GO:0006164	purine nucleotide biosynthetic process	2/330	155/11266	0.944543	0.999754	Niben261Chr03g1555004/Niben261Chr07g0438001	Niben261Chr03g1555004/Niben261Chr07g0438001	2	0		2	Niben261Chr03g1555004/Niben261Chr07g0438001
BP	GO:0072525	pyridine-containing compound biosynthetic process	1/330	97/11266	0.944772	0.999754	Niben261Chr03g1555004	Niben261Chr03g1555004	1	0		1	Niben261Chr03g1555004
BP	GO:0009123	nucleoside monophosphate metabolic process	2/330	158/11266	0.948517	0.999754	Niben261Chr03g1555004/Niben261Chr07g0438001	Niben261Chr03g1555004/Niben261Chr07g0438001	2	0		2	Niben261Chr03g1555004/Niben261Chr07g0438001
BP	GO:0009126	purine nucleoside monophosphate metabolic process	2/330	158/11266	0.948517	0.999754	Niben261Chr03g1555004/Niben261Chr07g0438001	Niben261Chr03g1555004/Niben261Chr07g0438001	2	0		2	Niben261Chr03g1555004/Niben261Chr07g0438001
BP	GO:0009161	ribonucleoside monophosphate metabolic process	2/330	158/11266	0.948517	0.999754	Niben261Chr03g1555004/Niben261Chr07g0438001	Niben261Chr03g1555004/Niben261Chr07g0438001	2	0		2	Niben261Chr03g1555004/Niben261Chr07g0438001
BP	GO:0009167	purine ribonucleoside monophosphate metabolic process	2/330	158/11266	0.948517	0.999754	Niben261Chr03g1555004/Niben261Chr07g0438001	Niben261Chr03g1555004/Niben261Chr07g0438001	2	0		2	Niben261Chr03g1555004/Niben261Chr07g0438001
BP	GO:0072522	purine-containing compound biosynthetic process	2/330	159/11266	0.949781	0.999754	Niben261Chr03g1555004/Niben261Chr07g0438001	Niben261Chr03g1555004/Niben261Chr07g0438001	2	0		2	Niben261Chr03g1555004/Niben261Chr07g0438001
BP	GO:0007165	signal transduction	4/330	261/11266	0.950549	0.999754	Niben261Chr18g0631005/Niben261Chr18g1427010/Niben261Chr05g0791009/Niben261Chr03g0822039	Niben261Chr18g0631005/Niben261Chr18g1427010/Niben261Chr05g0791009/Niben261Chr03g0822039	4	0		4	Niben261Chr18g0631005/Niben261Chr18g1427010/Niben261Chr05g0791009/Niben261Chr03g0822039
BP	GO:0023052	signaling	4/330	261/11266	0.950549	0.999754	Niben261Chr18g0631005/Niben261Chr18g1427010/Niben261Chr05g0791009/Niben261Chr03g0822039	Niben261Chr18g0631005/Niben261Chr18g1427010/Niben261Chr05g0791009/Niben261Chr03g0822039	4	0		4	Niben261Chr18g0631005/Niben261Chr18g1427010/Niben261Chr05g0791009/Niben261Chr03g0822039
BP	GO:0006732	coenzyme metabolic process	2/330	160/11266	0.951015	0.999754	Niben261Chr03g1555004/Niben261Chr07g0828009	Niben261Chr03g1555004/Niben261Chr07g0828009	2	0		2	Niben261Chr03g1555004/Niben261Chr07g0828009
BP	GO:0009719	response to endogenous stimulus	1/330	101/11266	0.951016	0.999754	Niben261Chr12g1315020	Niben261Chr12g1315020	1	1	Niben261Chr12g1315020	0
BP	GO:0009725	response to hormone	1/330	101/11266	0.951016	0.999754	Niben261Chr12g1315020	Niben261Chr12g1315020	1	1	Niben261Chr12g1315020	0
BP	GO:0010033	response to organic substance	1/330	101/11266	0.951016	0.999754	Niben261Chr12g1315020	Niben261Chr12g1315020	1	1	Niben261Chr12g1315020	0
BP	GO:1901605	alpha-amino acid metabolic process	1/330	101/11266	0.951016	0.999754	Niben261Chr10g1091006	Niben261Chr10g1091006	1	0		1	Niben261Chr10g1091006
BP	GO:0070085	glycosylation	1/330	102/11266	0.952464	0.999754	Niben261Chr14g1157014	Niben261Chr14g1157014	1	0		1	Niben261Chr14g1157014
BP	GO:0009141	nucleoside triphosphate metabolic process	2/330	162/11266	0.953397	0.999754	Niben261Chr03g1555004/Niben261Chr07g0438001	Niben261Chr03g1555004/Niben261Chr07g0438001	2	0		2	Niben261Chr03g1555004/Niben261Chr07g0438001
BP	GO:0006644	phospholipid metabolic process	1/330	103/11266	0.953869	0.999754	Niben261Chr17g1120002	Niben261Chr17g1120002	1	0		1	Niben261Chr17g1120002
BP	GO:0042592	homeostatic process	2/330	166/11266	0.957834	0.999754	Niben261Chr14g0762005/Niben261Chr04g1079002	Niben261Chr14g0762005/Niben261Chr04g1079002	2	0		2	Niben261Chr14g0762005/Niben261Chr04g1079002
BP	GO:0008652	cellular amino acid biosynthetic process	1/330	107/11266	0.959087	0.999754	Niben261Chr10g1091006	Niben261Chr10g1091006	1	0		1	Niben261Chr10g1091006
BP	GO:0046907	intracellular transport	3/330	221/11266	0.959604	0.999754	Niben261Chr03g1302010/Niben261Chr13g1364019/Niben261Chr03g0901016	Niben261Chr03g1302010/Niben261Chr13g1364019/Niben261Chr03g0901016	3	0		3	Niben261Chr03g1302010/Niben261Chr13g1364019/Niben261Chr03g0901016
BP	GO:0051649	establishment of localization in cell	3/330	221/11266	0.959604	0.999754	Niben261Chr03g1302010/Niben261Chr13g1364019/Niben261Chr03g0901016	Niben261Chr03g1302010/Niben261Chr13g1364019/Niben261Chr03g0901016	3	0		3	Niben261Chr03g1302010/Niben261Chr13g1364019/Niben261Chr03g0901016
BP	GO:0019362	pyridine nucleotide metabolic process	1/330	108/11266	0.960297	0.999754	Niben261Chr03g1555004	Niben261Chr03g1555004	1	0		1	Niben261Chr03g1555004
BP	GO:0046496	nicotinamide nucleotide metabolic process	1/330	108/11266	0.960297	0.999754	Niben261Chr03g1555004	Niben261Chr03g1555004	1	0		1	Niben261Chr03g1555004
BP	GO:0051186	cofactor metabolic process	3/330	222/11266	0.9605	0.999754	Niben261Chr03g1555004/novel.4431/Niben261Chr07g0828009	Niben261Chr03g1555004/-/Niben261Chr07g0828009	3	0		3	Niben261Chr03g1555004/novel.4431/Niben261Chr07g0828009
BP	GO:0006457	protein folding	1/330	109/11266	0.961471	0.999754	Niben261Chr18g0858015	Niben261Chr18g0858015	1	0		1	Niben261Chr18g0858015
BP	GO:0006733	oxidoreduction coenzyme metabolic process	1/330	110/11266	0.962611	0.999754	Niben261Chr03g1555004	Niben261Chr03g1555004	1	0		1	Niben261Chr03g1555004
BP	GO:0072524	pyridine-containing compound metabolic process	1/330	110/11266	0.962611	0.999754	Niben261Chr03g1555004	Niben261Chr03g1555004	1	0		1	Niben261Chr03g1555004
BP	GO:0034655	nucleobase-containing compound catabolic process	1/330	114/11266	0.966843	0.999754	Niben261Chr03g1555004	Niben261Chr03g1555004	1	0		1	Niben261Chr03g1555004
BP	GO:0009117	nucleotide metabolic process	3/330	231/11266	0.967762	0.999754	Niben261Chr03g1555004/Niben261Chr07g0828009/Niben261Chr07g0438001	Niben261Chr03g1555004/Niben261Chr07g0828009/Niben261Chr07g0438001	3	0		3	Niben261Chr03g1555004/Niben261Chr07g0828009/Niben261Chr07g0438001
BP	GO:0034220	ion transmembrane transport	2/330	179/11266	0.969629	0.999754	Niben261Chr07g0438001/Niben261Chr17g0375008	Niben261Chr07g0438001/Niben261Chr17g0375008	2	0		2	Niben261Chr07g0438001/Niben261Chr17g0375008
BP	GO:0009165	nucleotide biosynthetic process	2/330	183/11266	0.97257	0.999754	Niben261Chr03g1555004/Niben261Chr07g0438001	Niben261Chr03g1555004/Niben261Chr07g0438001	2	0		2	Niben261Chr03g1555004/Niben261Chr07g0438001
BP	GO:1901293	nucleoside phosphate biosynthetic process	2/330	183/11266	0.97257	0.999754	Niben261Chr03g1555004/Niben261Chr07g0438001	Niben261Chr03g1555004/Niben261Chr07g0438001	2	0		2	Niben261Chr03g1555004/Niben261Chr07g0438001
BP	GO:0006753	nucleoside phosphate metabolic process	3/330	239/11266	0.973144	0.999754	Niben261Chr03g1555004/Niben261Chr07g0828009/Niben261Chr07g0438001	Niben261Chr03g1555004/Niben261Chr07g0828009/Niben261Chr07g0438001	3	0		3	Niben261Chr03g1555004/Niben261Chr07g0828009/Niben261Chr07g0438001
BP	GO:0006886	intracellular protein transport	2/330	186/11266	0.974594	0.999754	Niben261Chr03g1302010/Niben261Chr13g1364019	Niben261Chr03g1302010/Niben261Chr13g1364019	2	0		2	Niben261Chr03g1302010/Niben261Chr13g1364019
BP	GO:1902600	proton transmembrane transport	1/330	124/11266	0.975449	0.999754	Niben261Chr07g0438001	Niben261Chr07g0438001	1	0		1	Niben261Chr07g0438001
BP	GO:0035556	intracellular signal transduction	1/330	127/11266	0.977567	0.999754	Niben261Chr05g0791009	Niben261Chr05g0791009	1	0		1	Niben261Chr05g0791009
BP	GO:0046700	heterocycle catabolic process	1/330	127/11266	0.977567	0.999754	Niben261Chr03g1555004	Niben261Chr03g1555004	1	0		1	Niben261Chr03g1555004
BP	GO:0019439	aromatic compound catabolic process	1/330	129/11266	0.978876	0.999754	Niben261Chr03g1555004	Niben261Chr03g1555004	1	0		1	Niben261Chr03g1555004
BP	GO:0044270	cellular nitrogen compound catabolic process	1/330	129/11266	0.978876	0.999754	Niben261Chr03g1555004	Niben261Chr03g1555004	1	0		1	Niben261Chr03g1555004
BP	GO:1901361	organic cyclic compound catabolic process	1/330	129/11266	0.978876	0.999754	Niben261Chr03g1555004	Niben261Chr03g1555004	1	0		1	Niben261Chr03g1555004
BP	GO:0044257	cellular protein catabolic process	1/330	130/11266	0.979502	0.999754	Niben261Chr11g1171006	Niben261Chr11g1171006	1	1	Niben261Chr11g1171006	0
BP	GO:0051603	proteolysis involved in cellular protein catabolic process	1/330	130/11266	0.979502	0.999754	Niben261Chr11g1171006	Niben261Chr11g1171006	1	1	Niben261Chr11g1171006	0
BP	GO:0030163	protein catabolic process	1/330	134/11266	0.981826	0.999754	Niben261Chr11g1171006	Niben261Chr11g1171006	1	1	Niben261Chr11g1171006	0
BP	GO:0006091	generation of precursor metabolites and energy	1/330	135/11266	0.982365	0.999754	Niben261Chr03g1555004	Niben261Chr03g1555004	1	0		1	Niben261Chr03g1555004
BP	GO:0051641	cellular localization	3/330	258/11266	0.982721	0.999754	Niben261Chr03g1302010/Niben261Chr13g1364019/Niben261Chr03g0901016	Niben261Chr03g1302010/Niben261Chr13g1364019/Niben261Chr03g0901016	3	0		3	Niben261Chr03g1302010/Niben261Chr13g1364019/Niben261Chr03g0901016
BP	GO:0009108	coenzyme biosynthetic process	1/330	137/11266	0.983395	0.999754	Niben261Chr03g1555004	Niben261Chr03g1555004	1	0		1	Niben261Chr03g1555004
BP	GO:0034613	cellular protein localization	2/330	203/11266	0.983607	0.999754	Niben261Chr03g1302010/Niben261Chr13g1364019	Niben261Chr03g1302010/Niben261Chr13g1364019	2	0		2	Niben261Chr03g1302010/Niben261Chr13g1364019
BP	GO:0070727	cellular macromolecule localization	2/330	203/11266	0.983607	0.999754	Niben261Chr03g1302010/Niben261Chr13g1364019	Niben261Chr03g1302010/Niben261Chr13g1364019	2	0		2	Niben261Chr03g1302010/Niben261Chr13g1364019
BP	GO:0015031	protein transport	3/330	261/11266	0.983897	0.999754	Niben261Chr03g1302010/Niben261Chr19g1427018/Niben261Chr13g1364019	Niben261Chr03g1302010/Niben261Chr19g1427018/Niben261Chr13g1364019	3	0		3	Niben261Chr03g1302010/Niben261Chr19g1427018/Niben261Chr13g1364019
BP	GO:0015833	peptide transport	3/330	261/11266	0.983897	0.999754	Niben261Chr03g1302010/Niben261Chr19g1427018/Niben261Chr13g1364019	Niben261Chr03g1302010/Niben261Chr19g1427018/Niben261Chr13g1364019	3	0		3	Niben261Chr03g1302010/Niben261Chr19g1427018/Niben261Chr13g1364019
BP	GO:0042886	amide transport	3/330	261/11266	0.983897	0.999754	Niben261Chr03g1302010/Niben261Chr19g1427018/Niben261Chr13g1364019	Niben261Chr03g1302010/Niben261Chr19g1427018/Niben261Chr13g1364019	3	0		3	Niben261Chr03g1302010/Niben261Chr19g1427018/Niben261Chr13g1364019
BP	GO:0016192	vesicle-mediated transport	3/330	262/11266	0.984272	0.999754	Niben261Chr03g1302010/Niben261Chr10g0063008/Niben261Chr08g0196018	Niben261Chr03g1302010/Niben261Chr10g0063008/Niben261Chr08g0196018	3	1	Niben261Chr10g0063008	2	Niben261Chr03g1302010/Niben261Chr08g0196018
BP	GO:0045184	establishment of protein localization	3/330	262/11266	0.984272	0.999754	Niben261Chr03g1302010/Niben261Chr19g1427018/Niben261Chr13g1364019	Niben261Chr03g1302010/Niben261Chr19g1427018/Niben261Chr13g1364019	3	0		3	Niben261Chr03g1302010/Niben261Chr19g1427018/Niben261Chr13g1364019
BP	GO:0045454	cell redox homeostasis	1/330	144/11266	0.986551	0.999754	Niben261Chr04g1079002	Niben261Chr04g1079002	1	0		1	Niben261Chr04g1079002
BP	GO:0065008	regulation of biological quality	2/330	217/11266	0.988624	0.999754	Niben261Chr14g0762005/Niben261Chr04g1079002	Niben261Chr14g0762005/Niben261Chr04g1079002	2	0		2	Niben261Chr14g0762005/Niben261Chr04g1079002
BP	GO:0008104	protein localization	3/330	278/11266	0.989245	0.999754	Niben261Chr03g1302010/Niben261Chr19g1427018/Niben261Chr13g1364019	Niben261Chr03g1302010/Niben261Chr19g1427018/Niben261Chr13g1364019	3	0		3	Niben261Chr03g1302010/Niben261Chr19g1427018/Niben261Chr13g1364019
BP	GO:1901137	carbohydrate derivative biosynthetic process	3/330	281/11266	0.989991	0.999754	Niben261Chr03g1555004/Niben261Chr14g1157014/Niben261Chr07g0438001	Niben261Chr03g1555004/Niben261Chr14g1157014/Niben261Chr07g0438001	3	0		3	Niben261Chr03g1555004/Niben261Chr14g1157014/Niben261Chr07g0438001
BP	GO:0044265	cellular macromolecule catabolic process	1/330	154/11266	0.99005	0.999754	Niben261Chr11g1171006	Niben261Chr11g1171006	1	1	Niben261Chr11g1171006	0
BP	GO:0051188	cofactor biosynthetic process	1/330	162/11266	0.992183	0.999754	Niben261Chr03g1555004	Niben261Chr03g1555004	1	0		1	Niben261Chr03g1555004
BP	GO:0098655	cation transmembrane transport	1/330	163/11266	0.992415	0.999754	Niben261Chr07g0438001	Niben261Chr07g0438001	1	0		1	Niben261Chr07g0438001
BP	GO:0098660	inorganic ion transmembrane transport	1/330	163/11266	0.992415	0.999754	Niben261Chr07g0438001	Niben261Chr07g0438001	1	0		1	Niben261Chr07g0438001
BP	GO:0098662	inorganic cation transmembrane transport	1/330	163/11266	0.992415	0.999754	Niben261Chr07g0438001	Niben261Chr07g0438001	1	0		1	Niben261Chr07g0438001
BP	GO:0033036	macromolecule localization	3/330	301/11266	0.993835	0.999754	Niben261Chr03g1302010/Niben261Chr19g1427018/Niben261Chr13g1364019	Niben261Chr03g1302010/Niben261Chr19g1427018/Niben261Chr13g1364019	3	0		3	Niben261Chr03g1302010/Niben261Chr19g1427018/Niben261Chr13g1364019
BP	GO:0015672	monovalent inorganic cation transport	1/330	171/11266	0.994042	0.999754	Niben261Chr07g0438001	Niben261Chr07g0438001	1	0		1	Niben261Chr07g0438001
BP	GO:0019637	organophosphate metabolic process	4/330	365/11266	0.994844	0.999754	Niben261Chr03g1555004/Niben261Chr07g0828009/Niben261Chr17g1120002/Niben261Chr07g0438001	Niben261Chr03g1555004/Niben261Chr07g0828009/Niben261Chr17g1120002/Niben261Chr07g0438001	4	0		4	Niben261Chr03g1555004/Niben261Chr07g0828009/Niben261Chr17g1120002/Niben261Chr07g0438001
BP	GO:0090407	organophosphate biosynthetic process	2/330	255/11266	0.995854	0.999754	Niben261Chr03g1555004/Niben261Chr07g0438001	Niben261Chr03g1555004/Niben261Chr07g0438001	2	0		2	Niben261Chr03g1555004/Niben261Chr07g0438001
BP	GO:0071702	organic substance transport	3/330	323/11266	0.996416	0.999754	Niben261Chr03g1302010/Niben261Chr19g1427018/Niben261Chr13g1364019	Niben261Chr03g1302010/Niben261Chr19g1427018/Niben261Chr13g1364019	3	0		3	Niben261Chr03g1302010/Niben261Chr19g1427018/Niben261Chr13g1364019
BP	GO:0006396	RNA processing	2/330	282/11266	0.998003	0.999754	Niben261Chr19g0052005/Niben261Chr12g0679012	Niben261Chr19g0052005/Niben261Chr12g0679012	2	0		2	Niben261Chr19g0052005/Niben261Chr12g0679012
BP	GO:0051716	cellular response to stimulus	4/330	422/11266	0.998655	0.999754	Niben261Chr18g0631005/Niben261Chr18g1427010/Niben261Chr05g0791009/Niben261Chr03g0822039	Niben261Chr18g0631005/Niben261Chr18g1427010/Niben261Chr05g0791009/Niben261Chr03g0822039	4	0		4	Niben261Chr18g0631005/Niben261Chr18g1427010/Niben261Chr05g0791009/Niben261Chr03g0822039
BP	GO:0006520	cellular amino acid metabolic process	1/330	247/11266	0.999404	0.999754	Niben261Chr10g1091006	Niben261Chr10g1091006	1	0		1	Niben261Chr10g1091006
BP	GO:0006259	DNA metabolic process	1/330	276/11266	0.999754	0.999754	Niben261Chr03g0012007	Niben261Chr03g0012007	1	0		1	Niben261Chr03g0012007
CC	GO:0005618	cell wall	5/97	45/4410	0.00282615	0.0518127	Niben261Chr18g0368002/Niben261Chr09g0698013/Niben261Chr15g0447003/Niben261Chr05g1071005/Niben261Chr01g0194003	Niben261Chr18g0368002/Niben261Chr09g0698013/Niben261Chr15g0447003/Niben261Chr05g1071005/Niben261Chr01g0194003	5	0		5	Niben261Chr18g0368002/Niben261Chr09g0698013/Niben261Chr15g0447003/Niben261Chr05g1071005/Niben261Chr01g0194003
CC	GO:0030312	external encapsulating structure	5/97	45/4410	0.00282615	0.0518127	Niben261Chr18g0368002/Niben261Chr09g0698013/Niben261Chr15g0447003/Niben261Chr05g1071005/Niben261Chr01g0194003	Niben261Chr18g0368002/Niben261Chr09g0698013/Niben261Chr15g0447003/Niben261Chr05g1071005/Niben261Chr01g0194003	5	0		5	Niben261Chr18g0368002/Niben261Chr09g0698013/Niben261Chr15g0447003/Niben261Chr05g1071005/Niben261Chr01g0194003
CC	GO:0048046	apoplast	5/97	45/4410	0.00282615	0.0518127	Niben261Chr18g0368002/Niben261Chr09g0698013/Niben261Chr15g0447003/Niben261Chr05g1071005/Niben261Chr01g0194003	Niben261Chr18g0368002/Niben261Chr09g0698013/Niben261Chr15g0447003/Niben261Chr05g1071005/Niben261Chr01g0194003	5	0		5	Niben261Chr18g0368002/Niben261Chr09g0698013/Niben261Chr15g0447003/Niben261Chr05g1071005/Niben261Chr01g0194003
CC	GO:0005576	extracellular region	5/97	54/4410	0.0062621	0.0861039	Niben261Chr18g0368002/Niben261Chr09g0698013/Niben261Chr15g0447003/Niben261Chr05g1071005/Niben261Chr01g0194003	Niben261Chr18g0368002/Niben261Chr09g0698013/Niben261Chr15g0447003/Niben261Chr05g1071005/Niben261Chr01g0194003	5	0		5	Niben261Chr18g0368002/Niben261Chr09g0698013/Niben261Chr15g0447003/Niben261Chr05g1071005/Niben261Chr01g0194003
CC	GO:0071944	cell periphery	7/97	120/4410	0.0157658	0.173424	Niben261Chr18g0368002/Niben261Chr09g0698013/Niben261Chr15g0447003/Niben261Chr05g1071005/Niben261Chr08g0196018/Niben261Chr12g0528019/Niben261Chr01g0194003	Niben261Chr18g0368002/Niben261Chr09g0698013/Niben261Chr15g0447003/Niben261Chr05g1071005/Niben261Chr08g0196018/Niben261Chr12g0528019/Niben261Chr01g0194003	7	1	Niben261Chr12g0528019	6	Niben261Chr18g0368002/Niben261Chr09g0698013/Niben261Chr15g0447003/Niben261Chr05g1071005/Niben261Chr08g0196018/Niben261Chr01g0194003
CC	GO:0005635	nuclear envelope	2/97	22/4410	0.0832165	0.653844	novel.7163/Niben261Chr03g0901016	-/Niben261Chr03g0901016	2	0		2	novel.7163/Niben261Chr03g0901016
CC	GO:0005643	nuclear pore	2/97	22/4410	0.0832165	0.653844	novel.7163/Niben261Chr03g0901016	-/Niben261Chr03g0901016	2	0		2	novel.7163/Niben261Chr03g0901016
CC	GO:0000276	mitochondrial proton-transporting ATP synthase complex, coupling factor F(o)	1/97	12/4410	0.234502	0.944347	Niben261Chr07g0438001	Niben261Chr07g0438001	1	0		1	Niben261Chr07g0438001
CC	GO:0031967	organelle envelope	3/97	88/4410	0.305444	0.944347	novel.7163/Niben261Chr07g0438001/Niben261Chr03g0901016	-/Niben261Chr07g0438001/Niben261Chr03g0901016	3	0		3	novel.7163/Niben261Chr07g0438001/Niben261Chr03g0901016
CC	GO:0031975	envelope	3/97	88/4410	0.305444	0.944347	novel.7163/Niben261Chr07g0438001/Niben261Chr03g0901016	-/Niben261Chr07g0438001/Niben261Chr03g0901016	3	0		3	novel.7163/Niben261Chr07g0438001/Niben261Chr03g0901016
CC	GO:0000148	1,3-beta-D-glucan synthase complex	1/97	18/4410	0.33043	0.944347	Niben261Chr12g0528019	Niben261Chr12g0528019	1	1	Niben261Chr12g0528019	0
CC	GO:0005753	mitochondrial proton-transporting ATP synthase complex	1/97	20/4410	0.359683	0.944347	Niben261Chr07g0438001	Niben261Chr07g0438001	1	0		1	Niben261Chr07g0438001
CC	GO:0005777	peroxisome	1/97	21/4410	0.373831	0.944347	Niben261Chr07g0077009	Niben261Chr07g0077009	1	0		1	Niben261Chr07g0077009
CC	GO:0042579	microbody	1/97	21/4410	0.373831	0.944347	Niben261Chr07g0077009	Niben261Chr07g0077009	1	0		1	Niben261Chr07g0077009
CC	GO:0045263	proton-transporting ATP synthase complex, coupling factor F(o)	1/97	23/4410	0.401206	0.944347	Niben261Chr07g0438001	Niben261Chr07g0438001	1	0		1	Niben261Chr07g0438001
CC	GO:0016459	myosin complex	1/97	30/4410	0.488014	0.944347	Niben261Chr02g0044001	Niben261Chr02g0044001	1	1	Niben261Chr02g0044001	0
CC	GO:0044455	mitochondrial membrane part	1/97	30/4410	0.488014	0.944347	Niben261Chr07g0438001	Niben261Chr07g0438001	1	0		1	Niben261Chr07g0438001
CC	GO:0098800	inner mitochondrial membrane protein complex	1/97	30/4410	0.488014	0.944347	Niben261Chr07g0438001	Niben261Chr07g0438001	1	0		1	Niben261Chr07g0438001
CC	GO:0098797	plasma membrane protein complex	1/97	31/4410	0.499352	0.944347	Niben261Chr12g0528019	Niben261Chr12g0528019	1	1	Niben261Chr12g0528019	0
CC	GO:0044459	plasma membrane part	1/97	33/4410	0.521289	0.944347	Niben261Chr12g0528019	Niben261Chr12g0528019	1	1	Niben261Chr12g0528019	0
CC	GO:0098798	mitochondrial protein complex	1/97	33/4410	0.521289	0.944347	Niben261Chr07g0438001	Niben261Chr07g0438001	1	0		1	Niben261Chr07g0438001
CC	GO:0000145	exocyst	1/97	37/4410	0.562348	0.944347	Niben261Chr08g0196018	Niben261Chr08g0196018	1	0		1	Niben261Chr08g0196018
CC	GO:0005938	cell cortex	1/97	37/4410	0.562348	0.944347	Niben261Chr08g0196018	Niben261Chr08g0196018	1	0		1	Niben261Chr08g0196018
CC	GO:0044448	cell cortex part	1/97	37/4410	0.562348	0.944347	Niben261Chr08g0196018	Niben261Chr08g0196018	1	0		1	Niben261Chr08g0196018
CC	GO:0099568	cytoplasmic region	1/97	37/4410	0.562348	0.944347	Niben261Chr08g0196018	Niben261Chr08g0196018	1	0		1	Niben261Chr08g0196018
CC	GO:0044428	nuclear part	4/97	181/4410	0.568985	0.944347	novel.7163/Niben261Chr19g0052005/Niben261Chr03g0901016/Niben261Chr12g0679012	-/Niben261Chr19g0052005/Niben261Chr03g0901016/Niben261Chr12g0679012	4	0		4	novel.7163/Niben261Chr19g0052005/Niben261Chr03g0901016/Niben261Chr12g0679012
CC	GO:0005886	plasma membrane	1/97	38/4410	0.572056	0.944347	Niben261Chr12g0528019	Niben261Chr12g0528019	1	1	Niben261Chr12g0528019	0
CC	GO:0005654	nucleoplasm	2/97	87/4410	0.575511	0.944347	Niben261Chr19g0052005/Niben261Chr12g0679012	Niben261Chr19g0052005/Niben261Chr12g0679012	2	0		2	Niben261Chr19g0052005/Niben261Chr12g0679012
CC	GO:0044451	nucleoplasm part	2/97	87/4410	0.575511	0.944347	Niben261Chr19g0052005/Niben261Chr12g0679012	Niben261Chr19g0052005/Niben261Chr12g0679012	2	0		2	Niben261Chr19g0052005/Niben261Chr12g0679012
CC	GO:0005743	mitochondrial inner membrane	1/97	39/4410	0.581551	0.944347	Niben261Chr07g0438001	Niben261Chr07g0438001	1	0		1	Niben261Chr07g0438001
CC	GO:0019866	organelle inner membrane	1/97	39/4410	0.581551	0.944347	Niben261Chr07g0438001	Niben261Chr07g0438001	1	0		1	Niben261Chr07g0438001
CC	GO:0045259	proton-transporting ATP synthase complex	1/97	41/4410	0.599919	0.944347	Niben261Chr07g0438001	Niben261Chr07g0438001	1	0		1	Niben261Chr07g0438001
CC	GO:0015629	actin cytoskeleton	1/97	45/4410	0.634295	0.944347	Niben261Chr02g0044001	Niben261Chr02g0044001	1	1	Niben261Chr02g0044001	0
CC	GO:0033177	proton-transporting two-sector ATPase complex, proton-transporting domain	1/97	48/4410	0.658143	0.944347	Niben261Chr07g0438001	Niben261Chr07g0438001	1	0		1	Niben261Chr07g0438001
CC	GO:0099023	tethering complex	1/97	49/4410	0.665745	0.944347	Niben261Chr08g0196018	Niben261Chr08g0196018	1	0		1	Niben261Chr08g0196018
CC	GO:0005839	proteasome core complex	1/97	56/4410	0.714472	0.944347	Niben261Chr11g1171006	Niben261Chr11g1171006	1	1	Niben261Chr11g1171006	0
CC	GO:0000502	proteasome complex	1/97	61/4410	0.744905	0.944347	Niben261Chr11g1171006	Niben261Chr11g1171006	1	1	Niben261Chr11g1171006	0
CC	GO:0031966	mitochondrial membrane	1/97	61/4410	0.744905	0.944347	Niben261Chr07g0438001	Niben261Chr07g0438001	1	0		1	Niben261Chr07g0438001
CC	GO:1905369	endopeptidase complex	1/97	61/4410	0.744905	0.944347	Niben261Chr11g1171006	Niben261Chr11g1171006	1	1	Niben261Chr11g1171006	0
CC	GO:0044430	cytoskeletal part	1/97	63/4410	0.756159	0.944347	Niben261Chr02g0044001	Niben261Chr02g0044001	1	1	Niben261Chr02g0044001	0
CC	GO:0031981	nuclear lumen	2/97	123/4410	0.760066	0.944347	Niben261Chr19g0052005/Niben261Chr12g0679012	Niben261Chr19g0052005/Niben261Chr12g0679012	2	0		2	Niben261Chr19g0052005/Niben261Chr12g0679012
CC	GO:0005856	cytoskeleton	1/97	65/4410	0.766921	0.944347	Niben261Chr02g0044001	Niben261Chr02g0044001	1	1	Niben261Chr02g0044001	0
CC	GO:0005740	mitochondrial envelope	1/97	66/4410	0.772124	0.944347	Niben261Chr07g0438001	Niben261Chr07g0438001	1	0		1	Niben261Chr07g0438001
CC	GO:1905368	peptidase complex	1/97	73/4410	0.805465	0.944347	Niben261Chr11g1171006	Niben261Chr11g1171006	1	1	Niben261Chr11g1171006	0
CC	GO:0031974	membrane-enclosed lumen	2/97	140/4410	0.820343	0.944347	Niben261Chr19g0052005/Niben261Chr12g0679012	Niben261Chr19g0052005/Niben261Chr12g0679012	2	0		2	Niben261Chr19g0052005/Niben261Chr12g0679012
CC	GO:0043233	organelle lumen	2/97	140/4410	0.820343	0.944347	Niben261Chr19g0052005/Niben261Chr12g0679012	Niben261Chr19g0052005/Niben261Chr12g0679012	2	0		2	Niben261Chr19g0052005/Niben261Chr12g0679012
CC	GO:0070013	intracellular organelle lumen	2/97	140/4410	0.820343	0.944347	Niben261Chr19g0052005/Niben261Chr12g0679012	Niben261Chr19g0052005/Niben261Chr12g0679012	2	0		2	Niben261Chr19g0052005/Niben261Chr12g0679012
CC	GO:0044429	mitochondrial part	1/97	81/4410	0.83769	0.944347	Niben261Chr07g0438001	Niben261Chr07g0438001	1	0		1	Niben261Chr07g0438001
CC	GO:0016469	proton-transporting two-sector ATPase complex	1/97	82/4410	0.841327	0.944347	Niben261Chr07g0438001	Niben261Chr07g0438001	1	0		1	Niben261Chr07g0438001
CC	GO:0005739	mitochondrion	1/97	95/4410	0.881873	0.95104	Niben261Chr07g0438001	Niben261Chr07g0438001	1	0		1	Niben261Chr07g0438001
CC	GO:1990234	transferase complex	1/97	95/4410	0.881873	0.95104	Niben261Chr12g0528019	Niben261Chr12g0528019	1	1	Niben261Chr12g0528019	0
CC	GO:0012505	endomembrane system	2/97	194/4410	0.932539	0.986339	novel.7163/Niben261Chr03g0901016	-/Niben261Chr03g0901016	2	0		2	novel.7163/Niben261Chr03g0901016
CC	GO:0031090	organelle membrane	1/97	139/4410	0.956781	0.992886	Niben261Chr07g0438001	Niben261Chr07g0438001	1	0		1	Niben261Chr07g0438001
CC	GO:1902494	catalytic complex	2/97	272/4410	0.985406	0.995026	Niben261Chr12g0528019/Niben261Chr11g1171006	Niben261Chr12g0528019/Niben261Chr11g1171006	2	2	Niben261Chr12g0528019/Niben261Chr11g1171006	0
CC	GO:0098796	membrane protein complex	2/97	324/4410	0.995026	0.995026	Niben261Chr12g0528019/Niben261Chr07g0438001	Niben261Chr12g0528019/Niben261Chr07g0438001	2	1	Niben261Chr12g0528019	1	Niben261Chr07g0438001
MF	GO:0020037	heme binding	39/488	440/17827	1.14019e-10	2.08655e-08	Niben261Chr04g1397002/Niben261Chr18g0191012/Niben261Chr07g1479010/Niben261Chr14g1373007/Niben261Chr13g0907007/Niben261Chr02g0458003/Niben261Chr10g0654005/Niben261Chr18g0107002/Niben261Chr02g0347021/Niben261Chr02g0064002/Niben261Chr04g1217010/novel.2245/Niben261Chr19g0661007/Niben261Chr02g0458008/Niben261Chr08g0024015/Niben261Chr06g0497004/Niben261Chr07g0234002/Niben261Chr19g0071003/Niben261Chr18g…	Niben261Chr04g1397002/Niben261Chr18g0191012/Niben261Chr07g1479010/Niben261Chr14g1373007/Niben261Chr13g0907007/Niben261Chr02g0458003/Niben261Chr10g0654005/Niben261Chr18g0107002/Niben261Chr02g0347021/Niben261Chr02g0064002/Niben261Chr04g1217010/-/Niben261Chr19g0661007/Niben261Chr02g0458008/Niben261Chr08g0024015/Niben261Chr06g0497004/Niben261Chr07g0234002/Niben261Chr19g0071003/Niben261Chr18g1309013/N…	39	4	Niben261Chr18g1309013/Niben261Chr13g0256009/Niben261Chr09g1293012/Niben261Chr16g0397001	35	Niben261Chr04g1397002/Niben261Chr18g0191012/Niben261Chr07g1479010/Niben261Chr14g1373007/Niben261Chr13g0907007/Niben261Chr02g0458003/Niben261Chr10g0654005/Niben261Chr18g0107002/Niben261Chr02g0347021/Niben261Chr02g0064002/Niben261Chr04g1217010/novel.2245/Niben261Chr19g0661007/Niben261Chr02g0458008/Niben261Chr08g0024015/Niben261Chr06g0497004/Niben261Chr07g0234002/Niben261Chr19g0071003/Niben261Chr12g…
MF	GO:0046906	tetrapyrrole binding	39/488	451/17827	2.36289e-10	2.16204e-08	Niben261Chr04g1397002/Niben261Chr18g0191012/Niben261Chr07g1479010/Niben261Chr14g1373007/Niben261Chr13g0907007/Niben261Chr02g0458003/Niben261Chr10g0654005/Niben261Chr18g0107002/Niben261Chr02g0347021/Niben261Chr02g0064002/Niben261Chr04g1217010/novel.2245/Niben261Chr19g0661007/Niben261Chr02g0458008/Niben261Chr08g0024015/Niben261Chr06g0497004/Niben261Chr07g0234002/Niben261Chr19g0071003/Niben261Chr18g…	Niben261Chr04g1397002/Niben261Chr18g0191012/Niben261Chr07g1479010/Niben261Chr14g1373007/Niben261Chr13g0907007/Niben261Chr02g0458003/Niben261Chr10g0654005/Niben261Chr18g0107002/Niben261Chr02g0347021/Niben261Chr02g0064002/Niben261Chr04g1217010/-/Niben261Chr19g0661007/Niben261Chr02g0458008/Niben261Chr08g0024015/Niben261Chr06g0497004/Niben261Chr07g0234002/Niben261Chr19g0071003/Niben261Chr18g1309013/N…	39	4	Niben261Chr18g1309013/Niben261Chr13g0256009/Niben261Chr09g1293012/Niben261Chr16g0397001	35	Niben261Chr04g1397002/Niben261Chr18g0191012/Niben261Chr07g1479010/Niben261Chr14g1373007/Niben261Chr13g0907007/Niben261Chr02g0458003/Niben261Chr10g0654005/Niben261Chr18g0107002/Niben261Chr02g0347021/Niben261Chr02g0064002/Niben261Chr04g1217010/novel.2245/Niben261Chr19g0661007/Niben261Chr02g0458008/Niben261Chr08g0024015/Niben261Chr06g0497004/Niben261Chr07g0234002/Niben261Chr19g0071003/Niben261Chr12g…
MF	GO:0016705	oxidoreductase activity, acting on paired donors, with incorporation or reduction of molecular oxygen	32/488	334/17827	8.23243e-10	5.02178e-08	Niben261Chr04g1397002/Niben261Chr14g1373007/Niben261Chr13g0907007/Niben261Chr02g0458003/Niben261Chr10g0654005/Niben261Chr18g0107002/Niben261Chr02g0347021/Niben261Chr02g0064002/Niben261Chr04g1217010/novel.2245/Niben261Chr02g0458008/Niben261Chr08g0024015/Niben261Chr06g0497004/Niben261Chr07g0234002/Niben261Chr19g0071003/Niben261Chr18g1309013/Niben261Chr18g0525005/Niben261Chr17g0723003/Niben261Chr17g…	Niben261Chr04g1397002/Niben261Chr14g1373007/Niben261Chr13g0907007/Niben261Chr02g0458003/Niben261Chr10g0654005/Niben261Chr18g0107002/Niben261Chr02g0347021/Niben261Chr02g0064002/Niben261Chr04g1217010/-/Niben261Chr02g0458008/Niben261Chr08g0024015/Niben261Chr06g0497004/Niben261Chr07g0234002/Niben261Chr19g0071003/Niben261Chr18g1309013/Niben261Chr18g0525005/Niben261Chr17g0723003/Niben261Chr17g1326001/N…	32	4	Niben261Chr18g1309013/Niben261Chr13g0256009/Niben261Chr09g1293012/Niben261Chr16g0397001	28	Niben261Chr04g1397002/Niben261Chr14g1373007/Niben261Chr13g0907007/Niben261Chr02g0458003/Niben261Chr10g0654005/Niben261Chr18g0107002/Niben261Chr02g0347021/Niben261Chr02g0064002/Niben261Chr04g1217010/novel.2245/Niben261Chr02g0458008/Niben261Chr08g0024015/Niben261Chr06g0497004/Niben261Chr07g0234002/Niben261Chr19g0071003/Niben261Chr18g0525005/Niben261Chr17g0723003/Niben261Chr17g1326001/Niben261Chr07g…
MF	GO:0005506	iron ion binding	33/488	357/17827	1.11788e-09	5.11428e-08	Niben261Chr04g1397002/Niben261Chr14g1373007/Niben261Chr13g0907007/Niben261Chr02g0458003/Niben261Chr14g0762005/Niben261Chr10g0654005/Niben261Chr18g0107002/Niben261Chr02g0347021/Niben261Chr02g0064002/Niben261Chr04g1217010/novel.2245/Niben261Chr02g0458008/Niben261Chr08g0024015/Niben261Chr06g0497004/Niben261Chr07g0234002/Niben261Chr19g0071003/Niben261Chr18g1309013/Niben261Chr18g0525005/Niben261Chr17g…	Niben261Chr04g1397002/Niben261Chr14g1373007/Niben261Chr13g0907007/Niben261Chr02g0458003/Niben261Chr14g0762005/Niben261Chr10g0654005/Niben261Chr18g0107002/Niben261Chr02g0347021/Niben261Chr02g0064002/Niben261Chr04g1217010/-/Niben261Chr02g0458008/Niben261Chr08g0024015/Niben261Chr06g0497004/Niben261Chr07g0234002/Niben261Chr19g0071003/Niben261Chr18g1309013/Niben261Chr18g0525005/Niben261Chr17g0723003/N…	33	4	Niben261Chr18g1309013/Niben261Chr13g0256009/Niben261Chr09g1293012/Niben261Chr16g0397001	29	Niben261Chr04g1397002/Niben261Chr14g1373007/Niben261Chr13g0907007/Niben261Chr02g0458003/Niben261Chr14g0762005/Niben261Chr10g0654005/Niben261Chr18g0107002/Niben261Chr02g0347021/Niben261Chr02g0064002/Niben261Chr04g1217010/novel.2245/Niben261Chr02g0458008/Niben261Chr08g0024015/Niben261Chr06g0497004/Niben261Chr07g0234002/Niben261Chr19g0071003/Niben261Chr18g0525005/Niben261Chr17g0723003/Niben261Chr17g…
MF	GO:0043565	sequence-specific DNA binding	24/488	289/17827	1.50613e-06	4.88017e-05	Niben261Chr15g1190002/Niben261Chr16g0378005/Niben261Chr03g1492001/novel.413/Niben261Chr11g0952012/Niben261Chr05g0878009/Niben261Chr12g0712005/Niben261Chr15g0466010/Niben261Chr12g0429008/Niben261Chr03g1612003/novel.4313/Niben261Chr03g1866001/Niben261Chr05g0171002/Niben261Chr07g0024001/Niben261Chr09g1073001/Niben261Chr08g0579001/Niben261Chr04g0615002/novel.2758/Niben261Chr05g0688002/Niben261Chr06g0…	Niben261Chr15g1190002/Niben261Chr16g0378005/Niben261Chr03g1492001/-/Niben261Chr11g0952012/Niben261Chr05g0878009/Niben261Chr12g0712005/Niben261Chr15g0466010/Niben261Chr12g0429008/Niben261Chr03g1612003/-/Niben261Chr03g1866001/Niben261Chr05g0171002/Niben261Chr07g0024001/Niben261Chr09g1073001/Niben261Chr08g0579001/Niben261Chr04g0615002/-/Niben261Chr05g0688002/Niben261Chr06g0738005/Niben261Chr15g07950…	24	1	Niben261Chr13g0294001	23	Niben261Chr15g1190002/Niben261Chr16g0378005/Niben261Chr03g1492001/novel.413/Niben261Chr11g0952012/Niben261Chr05g0878009/Niben261Chr12g0712005/Niben261Chr15g0466010/Niben261Chr12g0429008/Niben261Chr03g1612003/novel.4313/Niben261Chr03g1866001/Niben261Chr05g0171002/Niben261Chr07g0024001/Niben261Chr09g1073001/Niben261Chr08g0579001/Niben261Chr04g0615002/novel.2758/Niben261Chr05g0688002/Niben261Chr06g0…
MF	GO:0010333	terpene synthase activity	9/488	42/17827	1.60005e-06	4.88017e-05	Niben261Chr19g1337008/Niben261Chr14g1255002/Niben261Chr19g1336001/Niben261Chr19g1336006/Niben261Chr10g0513003/Niben261Chr06g0294004/Niben261Chr03g0205002/Niben261Chr06g0276010/Niben261Chr06g0283003	Niben261Chr19g1337008/Niben261Chr14g1255002/Niben261Chr19g1336001/Niben261Chr19g1336006/Niben261Chr10g0513003/Niben261Chr06g0294004/Niben261Chr03g0205002/Niben261Chr06g0276010/Niben261Chr06g0283003	9	0		9	Niben261Chr19g1337008/Niben261Chr14g1255002/Niben261Chr19g1336001/Niben261Chr19g1336006/Niben261Chr10g0513003/Niben261Chr06g0294004/Niben261Chr03g0205002/Niben261Chr06g0276010/Niben261Chr06g0283003
MF	GO:0004568	chitinase activity	6/488	16/17827	2.5875e-06	6.76448e-05	Niben261Chr07g1178010/Niben261Chr08g1237022/Niben261Chr18g1375009/Niben261Chr13g0010010/Niben261Chr15g1422003/Niben261Chr15g1259003	Niben261Chr07g1178010/Niben261Chr08g1237022/Niben261Chr18g1375009/Niben261Chr13g0010010/Niben261Chr15g1422003/Niben261Chr15g1259003	6	1	Niben261Chr08g1237022	5	Niben261Chr07g1178010/Niben261Chr18g1375009/Niben261Chr13g0010010/Niben261Chr15g1422003/Niben261Chr15g1259003
MF	GO:0016838	carbon-oxygen lyase activity, acting on phosphates	9/488	46/17827	3.58716e-06	8.20562e-05	Niben261Chr19g1337008/Niben261Chr14g1255002/Niben261Chr19g1336001/Niben261Chr19g1336006/Niben261Chr10g0513003/Niben261Chr06g0294004/Niben261Chr03g0205002/Niben261Chr06g0276010/Niben261Chr06g0283003	Niben261Chr19g1337008/Niben261Chr14g1255002/Niben261Chr19g1336001/Niben261Chr19g1336006/Niben261Chr10g0513003/Niben261Chr06g0294004/Niben261Chr03g0205002/Niben261Chr06g0276010/Niben261Chr06g0283003	9	0		9	Niben261Chr19g1337008/Niben261Chr14g1255002/Niben261Chr19g1336001/Niben261Chr19g1336006/Niben261Chr10g0513003/Niben261Chr06g0294004/Niben261Chr03g0205002/Niben261Chr06g0276010/Niben261Chr06g0283003
MF	GO:0004553	hydrolase activity, hydrolyzing O-glycosyl compounds	29/488	442/17827	1.3892e-05	0.00028247	Niben261Chr17g1502011/Niben261Chr03g0190005/Niben261Chr07g1178010/Niben261Chr04g0243021/Niben261Chr04g0242009/Niben261Chr06g0164016/Niben261Scf12034g0000002/Niben261Chr11g0684001/Niben261Chr18g0368002/Niben261Chr06g1154012/Niben261Chr03g0053001/Niben261Chr08g1237022/Niben261Chr04g0243008/Niben261Chr09g0698013/Niben261Chr17g1088002/Niben261Chr18g1375009/Niben261Chr06g1186001/Niben261Chr15g0447003/…	Niben261Chr17g1502011/Niben261Chr03g0190005/Niben261Chr07g1178010/Niben261Chr04g0243021/Niben261Chr04g0242009/Niben261Chr06g0164016/Niben261Scf12034g0000002/Niben261Chr11g0684001/Niben261Chr18g0368002/Niben261Chr06g1154012/Niben261Chr03g0053001/Niben261Chr08g1237022/Niben261Chr04g0243008/Niben261Chr09g0698013/Niben261Chr17g1088002/Niben261Chr18g1375009/Niben261Chr06g1186001/Niben261Chr15g0447003/…	29	2	Niben261Chr08g1237022/Niben261Chr08g0692001	27	Niben261Chr17g1502011/Niben261Chr03g0190005/Niben261Chr07g1178010/Niben261Chr04g0243021/Niben261Chr04g0242009/Niben261Chr06g0164016/Niben261Scf12034g0000002/Niben261Chr11g0684001/Niben261Chr18g0368002/Niben261Chr06g1154012/Niben261Chr03g0053001/Niben261Chr04g0243008/Niben261Chr09g0698013/Niben261Chr17g1088002/Niben261Chr18g1375009/Niben261Chr06g1186001/Niben261Chr15g0447003/Niben261Chr17g0988004/…
MF	GO:0016798	hydrolase activity, acting on glycosyl bonds	29/488	476/17827	5.38751e-05	0.000985914	Niben261Chr17g1502011/Niben261Chr03g0190005/Niben261Chr07g1178010/Niben261Chr04g0243021/Niben261Chr04g0242009/Niben261Chr06g0164016/Niben261Scf12034g0000002/Niben261Chr11g0684001/Niben261Chr18g0368002/Niben261Chr06g1154012/Niben261Chr03g0053001/Niben261Chr08g1237022/Niben261Chr04g0243008/Niben261Chr09g0698013/Niben261Chr17g1088002/Niben261Chr18g1375009/Niben261Chr06g1186001/Niben261Chr15g0447003/…	Niben261Chr17g1502011/Niben261Chr03g0190005/Niben261Chr07g1178010/Niben261Chr04g0243021/Niben261Chr04g0242009/Niben261Chr06g0164016/Niben261Scf12034g0000002/Niben261Chr11g0684001/Niben261Chr18g0368002/Niben261Chr06g1154012/Niben261Chr03g0053001/Niben261Chr08g1237022/Niben261Chr04g0243008/Niben261Chr09g0698013/Niben261Chr17g1088002/Niben261Chr18g1375009/Niben261Chr06g1186001/Niben261Chr15g0447003/…	29	2	Niben261Chr08g1237022/Niben261Chr08g0692001	27	Niben261Chr17g1502011/Niben261Chr03g0190005/Niben261Chr07g1178010/Niben261Chr04g0243021/Niben261Chr04g0242009/Niben261Chr06g0164016/Niben261Scf12034g0000002/Niben261Chr11g0684001/Niben261Chr18g0368002/Niben261Chr06g1154012/Niben261Chr03g0053001/Niben261Chr04g0243008/Niben261Chr09g0698013/Niben261Chr17g1088002/Niben261Chr18g1375009/Niben261Chr06g1186001/Niben261Chr15g0447003/Niben261Chr17g0988004/…
MF	GO:0000287	magnesium ion binding	11/488	99/17827	8.31159e-05	0.00138275	Niben261Chr19g1337008/Niben261Chr13g0994005/Niben261Chr14g1255002/Niben261Chr19g1336001/Niben261Chr19g1336006/Niben261Chr10g0513003/Niben261Chr06g0294004/Niben261Chr03g0205002/Niben261Chr06g0276010/Niben261Chr03g0002006/Niben261Chr06g0283003	Niben261Chr19g1337008/Niben261Chr13g0994005/Niben261Chr14g1255002/Niben261Chr19g1336001/Niben261Chr19g1336006/Niben261Chr10g0513003/Niben261Chr06g0294004/Niben261Chr03g0205002/Niben261Chr06g0276010/Niben261Chr03g0002006/Niben261Chr06g0283003	11	0		11	Niben261Chr19g1337008/Niben261Chr13g0994005/Niben261Chr14g1255002/Niben261Chr19g1336001/Niben261Chr19g1336006/Niben261Chr10g0513003/Niben261Chr06g0294004/Niben261Chr03g0205002/Niben261Chr06g0276010/Niben261Chr03g0002006/Niben261Chr06g0283003
MF	GO:0016835	carbon-oxygen lyase activity	9/488	90/17827	0.000794425	0.012115	Niben261Chr19g1337008/Niben261Chr14g1255002/Niben261Chr19g1336001/Niben261Chr19g1336006/Niben261Chr10g0513003/Niben261Chr06g0294004/Niben261Chr03g0205002/Niben261Chr06g0276010/Niben261Chr06g0283003	Niben261Chr19g1337008/Niben261Chr14g1255002/Niben261Chr19g1336001/Niben261Chr19g1336006/Niben261Chr10g0513003/Niben261Chr06g0294004/Niben261Chr03g0205002/Niben261Chr06g0276010/Niben261Chr06g0283003	9	0		9	Niben261Chr19g1337008/Niben261Chr14g1255002/Niben261Chr19g1336001/Niben261Chr19g1336006/Niben261Chr10g0513003/Niben261Chr06g0294004/Niben261Chr03g0205002/Niben261Chr06g0276010/Niben261Chr06g0283003
MF	GO:0016758	transferase activity, transferring hexosyl groups	21/488	395/17827	0.00303633	0.0427422	Niben261Chr10g0047001/Niben261Chr19g0944003/Niben261Chr18g0368002/Niben261Chr19g1304003/Niben261Chr04g1547019/Niben261Chr09g1279010/Niben261Chr13g0813007/Niben261Chr09g0698013/Niben261Chr18g1229009/Niben261Chr03g1794002/Niben261Chr08g1314002/Niben261Chr15g0447003/Niben261Chr14g1157014/Niben261Chr05g1071005/Niben261Chr12g0528019/Niben261Chr01g0194003/Niben261Chr17g0115013/Niben261Chr13g0057008/Nib…	Niben261Chr10g0047001/Niben261Chr19g0944003/Niben261Chr18g0368002/Niben261Chr19g1304003/Niben261Chr04g1547019/Niben261Chr09g1279010/Niben261Chr13g0813007/Niben261Chr09g0698013/Niben261Chr18g1229009/Niben261Chr03g1794002/Niben261Chr08g1314002/Niben261Chr15g0447003/Niben261Chr14g1157014/Niben261Chr05g1071005/Niben261Chr12g0528019/Niben261Chr01g0194003/Niben261Chr17g0115013/Niben261Chr13g0057008/Nib…	21	1	Niben261Chr12g0528019	20	Niben261Chr10g0047001/Niben261Chr19g0944003/Niben261Chr18g0368002/Niben261Chr19g1304003/Niben261Chr04g1547019/Niben261Chr09g1279010/Niben261Chr13g0813007/Niben261Chr09g0698013/Niben261Chr18g1229009/Niben261Chr03g1794002/Niben261Chr08g1314002/Niben261Chr15g0447003/Niben261Chr14g1157014/Niben261Chr05g1071005/Niben261Chr01g0194003/Niben261Chr17g0115013/Niben261Chr13g0057008/Niben261Chr06g0520008/Nib…
MF	GO:0004867	serine-type endopeptidase inhibitor activity	3/488	13/17827	0.00475113	0.062104	Niben261Chr10g0135007/Niben261Chr10g0130005/Niben261Chr10g0137007	Niben261Chr10g0135007/Niben261Chr10g0130005/Niben261Chr10g0137007	3	0		3	Niben261Chr10g0135007/Niben261Chr10g0130005/Niben261Chr10g0137007
MF	GO:0016829	lyase activity	13/488	210/17827	0.00531957	0.0648987	Niben261Chr19g1337008/Niben261Chr14g1255002/Niben261Chr19g1336001/Niben261Chr19g1336006/Niben261Chr10g0513003/Niben261Chr06g0294004/Niben261Chr18g0684004/Niben261Chr08g0323012/Niben261Chr03g0205002/Niben261Chr06g0276010/Niben261Chr11g1435015/Niben261Chr06g0283003/Niben261Chr01g1065004	Niben261Chr19g1337008/Niben261Chr14g1255002/Niben261Chr19g1336001/Niben261Chr19g1336006/Niben261Chr10g0513003/Niben261Chr06g0294004/Niben261Chr18g0684004/Niben261Chr08g0323012/Niben261Chr03g0205002/Niben261Chr06g0276010/Niben261Chr11g1435015/Niben261Chr06g0283003/Niben261Chr01g1065004	13	1	Niben261Chr11g1435015	12	Niben261Chr19g1337008/Niben261Chr14g1255002/Niben261Chr19g1336001/Niben261Chr19g1336006/Niben261Chr10g0513003/Niben261Chr06g0294004/Niben261Chr18g0684004/Niben261Chr08g0323012/Niben261Chr03g0205002/Niben261Chr06g0276010/Niben261Chr06g0283003/Niben261Chr01g1065004
MF	GO:0016762	xyloglucan:xyloglucosyl transferase activity	5/488	45/17827	0.00746965	0.0854341	Niben261Chr18g0368002/Niben261Chr09g0698013/Niben261Chr15g0447003/Niben261Chr05g1071005/Niben261Chr01g0194003	Niben261Chr18g0368002/Niben261Chr09g0698013/Niben261Chr15g0447003/Niben261Chr05g1071005/Niben261Chr01g0194003	5	0		5	Niben261Chr18g0368002/Niben261Chr09g0698013/Niben261Chr15g0447003/Niben261Chr05g1071005/Niben261Chr01g0194003
MF	GO:0019842	vitamin binding	9/488	128/17827	0.00866011	0.0912034	Niben261Chr01g1565004/Niben261Chr13g0994005/Niben261Chr18g0684004/Niben261Chr08g0323012/Niben261Chr09g1122007/Niben261Chr05g0879001/Niben261Chr18g0571013/Niben261Chr14g0328001/Niben261Chr01g1065004	Niben261Chr01g1565004/Niben261Chr13g0994005/Niben261Chr18g0684004/Niben261Chr08g0323012/Niben261Chr09g1122007/Niben261Chr05g0879001/Niben261Chr18g0571013/Niben261Chr14g0328001/Niben261Chr01g1065004	9	1	Niben261Chr14g0328001	8	Niben261Chr01g1565004/Niben261Chr13g0994005/Niben261Chr18g0684004/Niben261Chr08g0323012/Niben261Chr09g1122007/Niben261Chr05g0879001/Niben261Chr18g0571013/Niben261Chr01g1065004
MF	GO:0005516	calmodulin binding	5/488	47/17827	0.00897083	0.0912034	Niben261Chr08g0101021/Niben261Chr17g0171009/Niben261Chr06g1164013/Niben261Chr16g0578007/Niben261Chr06g0533003	Niben261Chr08g0101021/Niben261Chr17g0171009/Niben261Chr06g1164013/Niben261Chr16g0578007/Niben261Chr06g0533003	5	0		5	Niben261Chr08g0101021/Niben261Chr17g0171009/Niben261Chr06g1164013/Niben261Chr16g0578007/Niben261Chr06g0533003
MF	GO:0030170	pyridoxal phosphate binding	8/488	110/17827	0.010713	0.0980238	Niben261Chr01g1565004/Niben261Chr18g0684004/Niben261Chr08g0323012/Niben261Chr09g1122007/Niben261Chr05g0879001/Niben261Chr18g0571013/Niben261Chr14g0328001/Niben261Chr01g1065004	Niben261Chr01g1565004/Niben261Chr18g0684004/Niben261Chr08g0323012/Niben261Chr09g1122007/Niben261Chr05g0879001/Niben261Chr18g0571013/Niben261Chr14g0328001/Niben261Chr01g1065004	8	1	Niben261Chr14g0328001	7	Niben261Chr01g1565004/Niben261Chr18g0684004/Niben261Chr08g0323012/Niben261Chr09g1122007/Niben261Chr05g0879001/Niben261Chr18g0571013/Niben261Chr01g1065004
MF	GO:0070279	vitamin B6 binding	8/488	110/17827	0.010713	0.0980238	Niben261Chr01g1565004/Niben261Chr18g0684004/Niben261Chr08g0323012/Niben261Chr09g1122007/Niben261Chr05g0879001/Niben261Chr18g0571013/Niben261Chr14g0328001/Niben261Chr01g1065004	Niben261Chr01g1565004/Niben261Chr18g0684004/Niben261Chr08g0323012/Niben261Chr09g1122007/Niben261Chr05g0879001/Niben261Chr18g0571013/Niben261Chr14g0328001/Niben261Chr01g1065004	8	1	Niben261Chr14g0328001	7	Niben261Chr01g1565004/Niben261Chr18g0684004/Niben261Chr08g0323012/Niben261Chr09g1122007/Niben261Chr05g0879001/Niben261Chr18g0571013/Niben261Chr01g1065004
MF	GO:0004674	protein serine/threonine kinase activity	4/488	36/17827	0.0163491	0.142471	Niben261Chr01g1079014/Niben261Chr11g0759004/Niben261Chr01g0363002/Niben261Chr12g0629011	Niben261Chr01g1079014/Niben261Chr11g0759004/Niben261Chr01g0363002/Niben261Chr12g0629011	4	0		4	Niben261Chr01g1079014/Niben261Chr11g0759004/Niben261Chr01g0363002/Niben261Chr12g0629011
MF	GO:0015297	antiporter activity	9/488	148/17827	0.020754	0.172635	Niben261Chr05g0536007/Niben261Chr02g0493015/Niben261Chr17g1494009/Niben261Chr12g1406001/Niben261Chr05g1366011/Niben261Chr12g0287027/Niben261Chr05g1117003/Niben261Chr14g0756002/Niben261Chr15g0408008	Niben261Chr05g0536007/Niben261Chr02g0493015/Niben261Chr17g1494009/Niben261Chr12g1406001/Niben261Chr05g1366011/Niben261Chr12g0287027/Niben261Chr05g1117003/Niben261Chr14g0756002/Niben261Chr15g0408008	9	3	Niben261Chr02g0493015/Niben261Chr17g1494009/Niben261Chr15g0408008	6	Niben261Chr05g0536007/Niben261Chr12g1406001/Niben261Chr05g1366011/Niben261Chr12g0287027/Niben261Chr05g1117003/Niben261Chr14g0756002
MF	GO:0015291	secondary active transmembrane transporter activity	9/488	150/17827	0.0224187	0.178375	Niben261Chr05g0536007/Niben261Chr02g0493015/Niben261Chr17g1494009/Niben261Chr12g1406001/Niben261Chr05g1366011/Niben261Chr12g0287027/Niben261Chr05g1117003/Niben261Chr14g0756002/Niben261Chr15g0408008	Niben261Chr05g0536007/Niben261Chr02g0493015/Niben261Chr17g1494009/Niben261Chr12g1406001/Niben261Chr05g1366011/Niben261Chr12g0287027/Niben261Chr05g1117003/Niben261Chr14g0756002/Niben261Chr15g0408008	9	3	Niben261Chr02g0493015/Niben261Chr17g1494009/Niben261Chr15g0408008	6	Niben261Chr05g0536007/Niben261Chr12g1406001/Niben261Chr05g1366011/Niben261Chr12g0287027/Niben261Chr05g1117003/Niben261Chr14g0756002
MF	GO:0003729	mRNA binding	2/488	11/17827	0.0349255	0.263014	Niben261Chr19g0052005/Niben261Chr12g0679012	Niben261Chr19g0052005/Niben261Chr12g0679012	2	0		2	Niben261Chr19g0052005/Niben261Chr12g0679012
MF	GO:0004866	endopeptidase inhibitor activity	3/488	28/17827	0.0402426	0.263014	Niben261Chr10g0135007/Niben261Chr10g0130005/Niben261Chr10g0137007	Niben261Chr10g0135007/Niben261Chr10g0130005/Niben261Chr10g0137007	3	0		3	Niben261Chr10g0135007/Niben261Chr10g0130005/Niben261Chr10g0137007
MF	GO:0030414	peptidase inhibitor activity	3/488	28/17827	0.0402426	0.263014	Niben261Chr10g0135007/Niben261Chr10g0130005/Niben261Chr10g0137007	Niben261Chr10g0135007/Niben261Chr10g0130005/Niben261Chr10g0137007	3	0		3	Niben261Chr10g0135007/Niben261Chr10g0130005/Niben261Chr10g0137007
MF	GO:0061134	peptidase regulator activity	3/488	28/17827	0.0402426	0.263014	Niben261Chr10g0135007/Niben261Chr10g0130005/Niben261Chr10g0137007	Niben261Chr10g0135007/Niben261Chr10g0130005/Niben261Chr10g0137007	3	0		3	Niben261Chr10g0135007/Niben261Chr10g0130005/Niben261Chr10g0137007
MF	GO:0061135	endopeptidase regulator activity	3/488	28/17827	0.0402426	0.263014	Niben261Chr10g0135007/Niben261Chr10g0130005/Niben261Chr10g0137007	Niben261Chr10g0135007/Niben261Chr10g0130005/Niben261Chr10g0137007	3	0		3	Niben261Chr10g0135007/Niben261Chr10g0130005/Niben261Chr10g0137007
MF	GO:0015298	solute:cation antiporter activity	4/488	56/17827	0.0668943	0.408055	Niben261Chr05g0536007/Niben261Chr05g1366011/Niben261Chr12g0287027/Niben261Chr14g0756002	Niben261Chr05g0536007/Niben261Chr05g1366011/Niben261Chr12g0287027/Niben261Chr14g0756002	4	0		4	Niben261Chr05g0536007/Niben261Chr05g1366011/Niben261Chr12g0287027/Niben261Chr14g0756002
MF	GO:0015299	solute:proton antiporter activity	4/488	56/17827	0.0668943	0.408055	Niben261Chr05g0536007/Niben261Chr05g1366011/Niben261Chr12g0287027/Niben261Chr14g0756002	Niben261Chr05g0536007/Niben261Chr05g1366011/Niben261Chr12g0287027/Niben261Chr14g0756002	4	0		4	Niben261Chr05g0536007/Niben261Chr05g1366011/Niben261Chr12g0287027/Niben261Chr14g0756002
MF	GO:0015238	drug transmembrane transporter activity	5/488	91/17827	0.104309	0.61576	Niben261Chr02g0493015/Niben261Chr17g1494009/Niben261Chr12g1406001/Niben261Chr05g1117003/Niben261Chr15g0408008	Niben261Chr02g0493015/Niben261Chr17g1494009/Niben261Chr12g1406001/Niben261Chr05g1117003/Niben261Chr15g0408008	5	3	Niben261Chr02g0493015/Niben261Chr17g1494009/Niben261Chr15g0408008	2	Niben261Chr12g1406001/Niben261Chr05g1117003
MF	GO:0008234	cysteine-type peptidase activity	7/488	147/17827	0.109416	0.625721	Niben261Chr06g0608015/Niben261Chr19g0265003/Niben261Chr16g0225008/novel.5700/Niben261Chr16g0224011/Niben261Chr16g0224012/Niben261Chr07g1286014	Niben261Chr06g0608015/Niben261Chr19g0265003/Niben261Chr16g0225008/-/Niben261Chr16g0224011/Niben261Chr16g0224012/Niben261Chr07g1286014	7	1	Niben261Chr19g0265003	6	Niben261Chr06g0608015/Niben261Chr16g0225008/novel.5700/Niben261Chr16g0224011/Niben261Chr16g0224012/Niben261Chr07g1286014
MF	GO:0004601	peroxidase activity	7/488	150/17827	0.118239	0.655687	Niben261Chr18g0191012/Niben261Chr07g1479010/Niben261Chr19g0661007/Niben261Chr12g0933008/Niben261Chr09g0801010/Niben261Chr11g1324008/Niben261Chr16g0336001	Niben261Chr18g0191012/Niben261Chr07g1479010/Niben261Chr19g0661007/Niben261Chr12g0933008/Niben261Chr09g0801010/Niben261Chr11g1324008/Niben261Chr16g0336001	7	0		7	Niben261Chr18g0191012/Niben261Chr07g1479010/Niben261Chr19g0661007/Niben261Chr12g0933008/Niben261Chr09g0801010/Niben261Chr11g1324008/Niben261Chr16g0336001
MF	GO:0016684	oxidoreductase activity, acting on peroxide as acceptor	7/488	154/17827	0.130557	0.702705	Niben261Chr18g0191012/Niben261Chr07g1479010/Niben261Chr19g0661007/Niben261Chr12g0933008/Niben261Chr09g0801010/Niben261Chr11g1324008/Niben261Chr16g0336001	Niben261Chr18g0191012/Niben261Chr07g1479010/Niben261Chr19g0661007/Niben261Chr12g0933008/Niben261Chr09g0801010/Niben261Chr11g1324008/Niben261Chr16g0336001	7	0		7	Niben261Chr18g0191012/Niben261Chr07g1479010/Niben261Chr19g0661007/Niben261Chr12g0933008/Niben261Chr09g0801010/Niben261Chr11g1324008/Niben261Chr16g0336001
MF	GO:0046527	glucosyltransferase activity	6/488	127/17827	0.135787	0.707835	Niben261Chr18g0368002/Niben261Chr09g0698013/Niben261Chr15g0447003/Niben261Chr05g1071005/Niben261Chr12g0528019/Niben261Chr01g0194003	Niben261Chr18g0368002/Niben261Chr09g0698013/Niben261Chr15g0447003/Niben261Chr05g1071005/Niben261Chr12g0528019/Niben261Chr01g0194003	6	1	Niben261Chr12g0528019	5	Niben261Chr18g0368002/Niben261Chr09g0698013/Niben261Chr15g0447003/Niben261Chr05g1071005/Niben261Chr01g0194003
MF	GO:0016790	thiolester hydrolase activity	2/488	24/17827	0.139246	0.707835	Niben261Chr04g0097017/Niben261Chr17g1320001	Niben261Chr04g0097017/Niben261Chr17g1320001	2	2	Niben261Chr04g0097017/Niben261Chr17g1320001	0
MF	GO:0005544	calcium-dependent phospholipid binding	2/488	25/17827	0.148746	0.713005	Niben261Chr10g0377012/Niben261Chr09g1038012	Niben261Chr10g0377012/Niben261Chr09g1038012	2	0		2	Niben261Chr10g0377012/Niben261Chr09g1038012
MF	GO:0004185	serine-type carboxypeptidase activity	3/488	50/17827	0.156648	0.713005	Niben261Chr10g0675014/Niben261Chr02g0340005/Niben261Chr11g0476003	Niben261Chr10g0675014/Niben261Chr02g0340005/Niben261Chr11g0476003	3	2	Niben261Chr02g0340005/Niben261Chr11g0476003	1	Niben261Chr10g0675014
MF	GO:0016620	oxidoreductase activity, acting on the aldehyde or oxo group of donors, NAD or NADP as acceptor	2/488	26/17827	0.158372	0.713005	Niben261Chr19g0662011/Niben261Chr03g0853016	Niben261Chr19g0662011/Niben261Chr03g0853016	2	2	Niben261Chr19g0662011/Niben261Chr03g0853016	0
MF	GO:0043531	ADP binding	7/488	164/17827	0.16398	0.713005	Niben261Chr01g1256009/Niben261Chr03g0033015/Niben261Chr09g0020017/novel.6442/Niben261Chr11g1415011/Niben261Chr14g0608014/Niben261Scf15218g0000001	Niben261Chr01g1256009/Niben261Chr03g0033015/Niben261Chr09g0020017/-/Niben261Chr11g1415011/Niben261Chr14g0608014/Niben261Scf15218g0000001	7	2	Niben261Chr03g0033015/Niben261Chr11g1415011	5	Niben261Chr01g1256009/Niben261Chr09g0020017/novel.6442/Niben261Chr14g0608014/Niben261Scf15218g0000001
MF	GO:0016160	amylase activity	2/488	27/17827	0.16811	0.713005	Niben261Chr11g0684001/Niben261Chr06g1186001	Niben261Chr11g0684001/Niben261Chr06g1186001	2	0		2	Niben261Chr11g0684001/Niben261Chr06g1186001
MF	GO:0016831	carboxy-lyase activity	3/488	53/17827	0.176789	0.713005	Niben261Chr18g0684004/Niben261Chr08g0323012/Niben261Chr01g1065004	Niben261Chr18g0684004/Niben261Chr08g0323012/Niben261Chr01g1065004	3	0		3	Niben261Chr18g0684004/Niben261Chr08g0323012/Niben261Chr01g1065004
MF	GO:0015116	sulfate transmembrane transporter activity	2/488	28/17827	0.177946	0.713005	Niben261Chr17g0387001/Niben261Chr05g0124003	Niben261Chr17g0387001/Niben261Chr05g0124003	2	0		2	Niben261Chr17g0387001/Niben261Chr05g0124003
MF	GO:1901682	sulfur compound transmembrane transporter activity	2/488	28/17827	0.177946	0.713005	Niben261Chr17g0387001/Niben261Chr05g0124003	Niben261Chr17g0387001/Niben261Chr05g0124003	2	0		2	Niben261Chr17g0387001/Niben261Chr05g0124003
MF	GO:0016209	antioxidant activity	7/488	169/17827	0.181995	0.713005	Niben261Chr18g0191012/Niben261Chr07g1479010/Niben261Chr19g0661007/Niben261Chr12g0933008/Niben261Chr09g0801010/Niben261Chr11g1324008/Niben261Chr16g0336001	Niben261Chr18g0191012/Niben261Chr07g1479010/Niben261Chr19g0661007/Niben261Chr12g0933008/Niben261Chr09g0801010/Niben261Chr11g1324008/Niben261Chr16g0336001	7	0		7	Niben261Chr18g0191012/Niben261Chr07g1479010/Niben261Chr19g0661007/Niben261Chr12g0933008/Niben261Chr09g0801010/Niben261Chr11g1324008/Niben261Chr16g0336001
MF	GO:0004180	carboxypeptidase activity	3/488	54/17827	0.183656	0.713005	Niben261Chr10g0675014/Niben261Chr02g0340005/Niben261Chr11g0476003	Niben261Chr10g0675014/Niben261Chr02g0340005/Niben261Chr11g0476003	3	2	Niben261Chr02g0340005/Niben261Chr11g0476003	1	Niben261Chr10g0675014
MF	GO:0005216	ion channel activity	4/488	82/17827	0.187018	0.713005	Niben261Chr14g0841005/Niben261Chr15g0795003/Niben261Chr16g0236038/Niben261Chr14g1158001	Niben261Chr14g0841005/Niben261Chr15g0795003/Niben261Chr16g0236038/Niben261Chr14g1158001	4	0		4	Niben261Chr14g0841005/Niben261Chr15g0795003/Niben261Chr16g0236038/Niben261Chr14g1158001
MF	GO:0022838	substrate-specific channel activity	4/488	82/17827	0.187018	0.713005	Niben261Chr14g0841005/Niben261Chr15g0795003/Niben261Chr16g0236038/Niben261Chr14g1158001	Niben261Chr14g0841005/Niben261Chr15g0795003/Niben261Chr16g0236038/Niben261Chr14g1158001	4	0		4	Niben261Chr14g0841005/Niben261Chr15g0795003/Niben261Chr16g0236038/Niben261Chr14g1158001
MF	GO:0005507	copper ion binding	4/488	84/17827	0.19818	0.734358	Niben261Chr15g0486001/Niben261Chr07g0124001/Niben261Chr02g1447006/Niben261Chr17g0400019	Niben261Chr15g0486001/Niben261Chr07g0124001/Niben261Chr02g1447006/Niben261Chr17g0400019	4	0		4	Niben261Chr15g0486001/Niben261Chr07g0124001/Niben261Chr02g1447006/Niben261Chr17g0400019
MF	GO:0022804	active transmembrane transporter activity	10/488	268/17827	0.201172	0.734358	Niben261Chr05g0536007/Niben261Chr02g0493015/Niben261Chr01g0459008/Niben261Chr17g1494009/Niben261Chr12g1406001/Niben261Chr05g1366011/Niben261Chr12g0287027/Niben261Chr05g1117003/Niben261Chr14g0756002/Niben261Chr15g0408008	Niben261Chr05g0536007/Niben261Chr02g0493015/Niben261Chr01g0459008/Niben261Chr17g1494009/Niben261Chr12g1406001/Niben261Chr05g1366011/Niben261Chr12g0287027/Niben261Chr05g1117003/Niben261Chr14g0756002/Niben261Chr15g0408008	10	3	Niben261Chr02g0493015/Niben261Chr17g1494009/Niben261Chr15g0408008	7	Niben261Chr05g0536007/Niben261Chr01g0459008/Niben261Chr12g1406001/Niben261Chr05g1366011/Niben261Chr12g0287027/Niben261Chr05g1117003/Niben261Chr14g0756002
MF	GO:0070008	serine-type exopeptidase activity	3/488	57/17827	0.204657	0.734358	Niben261Chr10g0675014/Niben261Chr02g0340005/Niben261Chr11g0476003	Niben261Chr10g0675014/Niben261Chr02g0340005/Niben261Chr11g0476003	3	2	Niben261Chr02g0340005/Niben261Chr11g0476003	1	Niben261Chr10g0675014
MF	GO:0015075	ion transmembrane transporter activity	14/488	406/17827	0.224763	0.77394	Niben261Chr17g0387001/Niben261Chr14g0841005/Niben261Chr05g0536007/Niben261Chr05g0827010/Niben261Chr17g0086012/Niben261Chr15g0795003/Niben261Chr16g0236038/Niben261Chr05g1366011/Niben261Chr12g0287027/Niben261Chr05g0124003/Niben261Chr14g1158001/Niben261Chr02g0419002/Niben261Chr14g0756002/Niben261Chr07g0438001	Niben261Chr17g0387001/Niben261Chr14g0841005/Niben261Chr05g0536007/Niben261Chr05g0827010/Niben261Chr17g0086012/Niben261Chr15g0795003/Niben261Chr16g0236038/Niben261Chr05g1366011/Niben261Chr12g0287027/Niben261Chr05g0124003/Niben261Chr14g1158001/Niben261Chr02g0419002/Niben261Chr14g0756002/Niben261Chr07g0438001	14	1	Niben261Chr02g0419002	13	Niben261Chr17g0387001/Niben261Chr14g0841005/Niben261Chr05g0536007/Niben261Chr05g0827010/Niben261Chr17g0086012/Niben261Chr15g0795003/Niben261Chr16g0236038/Niben261Chr05g1366011/Niben261Chr12g0287027/Niben261Chr05g0124003/Niben261Chr14g1158001/Niben261Chr14g0756002/Niben261Chr07g0438001
MF	GO:0008375	acetylglucosaminyltransferase activity	3/488	65/17827	0.262883	0.77394	Niben261Chr13g0813007/Niben261Chr08g1314002/Niben261Chr06g0520008	Niben261Chr13g0813007/Niben261Chr08g1314002/Niben261Chr06g0520008	3	0		3	Niben261Chr13g0813007/Niben261Chr08g1314002/Niben261Chr06g0520008
MF	GO:0004144	diacylglycerol O-acyltransferase activity	1/488	11/17827	0.263172	0.77394	Niben261Chr01g0076002	Niben261Chr01g0076002	1	0		1	Niben261Chr01g0076002
MF	GO:0016411	acylglycerol O-acyltransferase activity	1/488	11/17827	0.263172	0.77394	Niben261Chr01g0076002	Niben261Chr01g0076002	1	0		1	Niben261Chr01g0076002
MF	GO:0016892	endoribonuclease activity, producing 3'-phosphomonoesters	1/488	11/17827	0.263172	0.77394	Niben261Chr19g1042003	Niben261Chr19g1042003	1	0		1	Niben261Chr19g1042003
MF	GO:0016894	endonuclease activity, active with either ribo- or deoxyribonucleic acids and producing 3'-phosphomonoesters	1/488	11/17827	0.263172	0.77394	Niben261Chr19g1042003	Niben261Chr19g1042003	1	0		1	Niben261Chr19g1042003
MF	GO:0019900	kinase binding	1/488	11/17827	0.263172	0.77394	Niben261Chr05g1037002	Niben261Chr05g1037002	1	1	Niben261Chr05g1037002	0
MF	GO:0019901	protein kinase binding	1/488	11/17827	0.263172	0.77394	Niben261Chr05g1037002	Niben261Chr05g1037002	1	1	Niben261Chr05g1037002	0
MF	GO:0030246	carbohydrate binding	6/488	159/17827	0.270058	0.77394	Niben261Chr16g0914003/Niben261Chr13g0020008/Niben261Chr08g1118011/Niben261Chr01g1747008/Niben261Chr17g1498005/Niben261Chr01g0727006	Niben261Chr16g0914003/Niben261Chr13g0020008/Niben261Chr08g1118011/Niben261Chr01g1747008/Niben261Chr17g1498005/Niben261Chr01g0727006	6	0		6	Niben261Chr16g0914003/Niben261Chr13g0020008/Niben261Chr08g1118011/Niben261Chr01g1747008/Niben261Chr17g1498005/Niben261Chr01g0727006
MF	GO:0015267	channel activity	6/488	160/17827	0.274729	0.77394	Niben261Chr14g0841005/Niben261Chr18g1356004/Niben261Chr15g0795003/Niben261Chr16g0236038/Niben261Chr16g1224004/Niben261Chr14g1158001	Niben261Chr14g0841005/Niben261Chr18g1356004/Niben261Chr15g0795003/Niben261Chr16g0236038/Niben261Chr16g1224004/Niben261Chr14g1158001	6	1	Niben261Chr16g1224004	5	Niben261Chr14g0841005/Niben261Chr18g1356004/Niben261Chr15g0795003/Niben261Chr16g0236038/Niben261Chr14g1158001
MF	GO:0022803	passive transmembrane transporter activity	6/488	160/17827	0.274729	0.77394	Niben261Chr14g0841005/Niben261Chr18g1356004/Niben261Chr15g0795003/Niben261Chr16g0236038/Niben261Chr16g1224004/Niben261Chr14g1158001	Niben261Chr14g0841005/Niben261Chr18g1356004/Niben261Chr15g0795003/Niben261Chr16g0236038/Niben261Chr16g1224004/Niben261Chr14g1158001	6	1	Niben261Chr16g1224004	5	Niben261Chr14g0841005/Niben261Chr18g1356004/Niben261Chr15g0795003/Niben261Chr16g0236038/Niben261Chr14g1158001
MF	GO:0045735	nutrient reservoir activity	2/488	38/17827	0.279222	0.77394	Niben261Chr09g0300009/Niben261Chr13g0275001	Niben261Chr09g0300009/Niben261Chr13g0275001	2	2	Niben261Chr09g0300009/Niben261Chr13g0275001	0
MF	GO:0008519	ammonium transmembrane transporter activity	1/488	12/17827	0.283355	0.77394	Niben261Chr05g0827010	Niben261Chr05g0827010	1	0		1	Niben261Chr05g0827010
MF	GO:0016843	amine-lyase activity	1/488	12/17827	0.283355	0.77394	Niben261Chr11g1435015	Niben261Chr11g1435015	1	1	Niben261Chr11g1435015	0
MF	GO:0016844	strictosidine synthase activity	1/488	12/17827	0.283355	0.77394	Niben261Chr11g1435015	Niben261Chr11g1435015	1	1	Niben261Chr11g1435015	0
MF	GO:0030976	thiamine pyrophosphate binding	1/488	12/17827	0.283355	0.77394	Niben261Chr13g0994005	Niben261Chr13g0994005	1	0		1	Niben261Chr13g0994005
MF	GO:0015318	inorganic molecular entity transmembrane transporter activity	12/488	362/17827	0.289935	0.780265	Niben261Chr17g0387001/Niben261Chr14g0841005/Niben261Chr05g0536007/Niben261Chr17g0086012/Niben261Chr15g0795003/Niben261Chr16g0236038/Niben261Chr05g1366011/Niben261Chr12g0287027/Niben261Chr05g0124003/Niben261Chr14g1158001/Niben261Chr14g0756002/Niben261Chr07g0438001	Niben261Chr17g0387001/Niben261Chr14g0841005/Niben261Chr05g0536007/Niben261Chr17g0086012/Niben261Chr15g0795003/Niben261Chr16g0236038/Niben261Chr05g1366011/Niben261Chr12g0287027/Niben261Chr05g0124003/Niben261Chr14g1158001/Niben261Chr14g0756002/Niben261Chr07g0438001	12	0		12	Niben261Chr17g0387001/Niben261Chr14g0841005/Niben261Chr05g0536007/Niben261Chr17g0086012/Niben261Chr15g0795003/Niben261Chr16g0236038/Niben261Chr05g1366011/Niben261Chr12g0287027/Niben261Chr05g0124003/Niben261Chr14g1158001/Niben261Chr14g0756002/Niben261Chr07g0438001
MF	GO:0008238	exopeptidase activity	3/488	70/17827	0.300259	0.780935	Niben261Chr10g0675014/Niben261Chr02g0340005/Niben261Chr11g0476003	Niben261Chr10g0675014/Niben261Chr02g0340005/Niben261Chr11g0476003	3	2	Niben261Chr02g0340005/Niben261Chr11g0476003	1	Niben261Chr10g0675014
MF	GO:0016703	oxidoreductase activity, acting on single donors with incorporation of molecular oxygen, incorporation of one atom of oxygen (internal monooxygenases or internal mixed function oxidases)	1/488	13/17827	0.302986	0.780935	Niben261Chr10g0616010	Niben261Chr10g0616010	1	0		1	Niben261Chr10g0616010
MF	GO:0016884	carbon-nitrogen ligase activity, with glutamine as amido-N-donor	1/488	13/17827	0.302986	0.780935	Niben261Chr10g1091006	Niben261Chr10g1091006	1	0		1	Niben261Chr10g1091006
MF	GO:0015078	proton transmembrane transporter activity	5/488	136/17827	0.316212	0.803706	Niben261Chr05g0536007/Niben261Chr05g1366011/Niben261Chr12g0287027/Niben261Chr14g0756002/Niben261Chr07g0438001	Niben261Chr05g0536007/Niben261Chr05g1366011/Niben261Chr12g0287027/Niben261Chr14g0756002/Niben261Chr07g0438001	5	0		5	Niben261Chr05g0536007/Niben261Chr05g1366011/Niben261Chr12g0287027/Niben261Chr14g0756002/Niben261Chr07g0438001
MF	GO:0001871	pattern binding	2/488	43/17827	0.330021	0.804477	Niben261Chr17g1498005/Niben261Chr01g0727006	Niben261Chr17g1498005/Niben261Chr01g0727006	2	0		2	Niben261Chr17g1498005/Niben261Chr01g0727006
MF	GO:0030247	polysaccharide binding	2/488	43/17827	0.330021	0.804477	Niben261Chr17g1498005/Niben261Chr01g0727006	Niben261Chr17g1498005/Niben261Chr01g0727006	2	0		2	Niben261Chr17g1498005/Niben261Chr01g0727006
MF	GO:0005509	calcium ion binding	9/488	277/17827	0.348108	0.804477	Niben261Chr17g1112002/Niben261Chr11g0684001/Niben261Chr15g1181003/Niben261Chr03g1073005/Niben261Chr10g0377012/Niben261Scf01441g0000001/Niben261Chr03g0170029/Niben261Chr02g1378002/Niben261Chr09g1038012	Niben261Chr17g1112002/Niben261Chr11g0684001/Niben261Chr15g1181003/Niben261Chr03g1073005/Niben261Chr10g0377012/Niben261Scf01441g0000001/Niben261Chr03g0170029/Niben261Chr02g1378002/Niben261Chr09g1038012	9	1	Niben261Chr03g1073005	8	Niben261Chr17g1112002/Niben261Chr11g0684001/Niben261Chr15g1181003/Niben261Chr10g0377012/Niben261Scf01441g0000001/Niben261Chr03g0170029/Niben261Chr02g1378002/Niben261Chr09g1038012
MF	GO:0016903	oxidoreductase activity, acting on the aldehyde or oxo group of donors	2/488	46/17827	0.360045	0.804477	Niben261Chr19g0662011/Niben261Chr03g0853016	Niben261Chr19g0662011/Niben261Chr03g0853016	2	2	Niben261Chr19g0662011/Niben261Chr03g0853016	0
MF	GO:0016830	carbon-carbon lyase activity	3/488	78/17827	0.360418	0.804477	Niben261Chr18g0684004/Niben261Chr08g0323012/Niben261Chr01g1065004	Niben261Chr18g0684004/Niben261Chr08g0323012/Niben261Chr01g1065004	3	0		3	Niben261Chr18g0684004/Niben261Chr08g0323012/Niben261Chr01g1065004
MF	GO:0033926	glycopeptide alpha-N-acetylgalactosaminidase activity	1/488	17/17827	0.376287	0.804477	Niben261Chr06g1231005	Niben261Chr06g1231005	1	0		1	Niben261Chr06g1231005
MF	GO:0003843	1,3-beta-D-glucan synthase activity	1/488	18/17827	0.393377	0.804477	Niben261Chr12g0528019	Niben261Chr12g0528019	1	1	Niben261Chr12g0528019	0
MF	GO:0016840	carbon-nitrogen lyase activity	1/488	18/17827	0.393377	0.804477	Niben261Chr11g1435015	Niben261Chr11g1435015	1	1	Niben261Chr11g1435015	0
MF	GO:0004857	enzyme inhibitor activity	4/488	117/17827	0.398847	0.804477	Niben261Chr10g0135007/Niben261Chr08g0530007/Niben261Chr10g0130005/Niben261Chr10g0137007	Niben261Chr10g0135007/Niben261Chr08g0530007/Niben261Chr10g0130005/Niben261Chr10g0137007	4	1	Niben261Chr08g0530007	3	Niben261Chr10g0135007/Niben261Chr10g0130005/Niben261Chr10g0137007
MF	GO:0003779	actin binding	2/488	51/17827	0.408895	0.804477	Niben261Chr17g1393008/Niben261Chr03g1062002	Niben261Chr17g1393008/Niben261Chr03g1062002	2	1	Niben261Chr03g1062002	1	Niben261Chr17g1393008
MF	GO:0031072	heat shock protein binding	1/488	19/17827	0.409999	0.804477	Niben261Chr18g0858015	Niben261Chr18g0858015	1	0		1	Niben261Chr18g0858015
MF	GO:0009055	electron transfer activity	5/488	155/17827	0.419356	0.804477	Niben261Chr08g0159001/Niben261Chr06g1348010/Niben261Chr18g0288001/Niben261Chr18g0287009/Niben261Chr03g0438001	Niben261Chr08g0159001/Niben261Chr06g1348010/Niben261Chr18g0288001/Niben261Chr18g0287009/Niben261Chr03g0438001	5	0		5	Niben261Chr08g0159001/Niben261Chr06g1348010/Niben261Chr18g0288001/Niben261Chr18g0287009/Niben261Chr03g0438001
MF	GO:0016747	transferase activity, transferring acyl groups other than amino-acyl groups	5/488	155/17827	0.419356	0.804477	Niben261Chr17g0620012/Niben261Chr09g0105009/Niben261Chr19g0257004/Niben261Chr01g0076002/Niben261Chr09g1049004	Niben261Chr17g0620012/Niben261Chr09g0105009/Niben261Chr19g0257004/Niben261Chr01g0076002/Niben261Chr09g1049004	5	0		5	Niben261Chr17g0620012/Niben261Chr09g0105009/Niben261Chr19g0257004/Niben261Chr01g0076002/Niben261Chr09g1049004
MF	GO:0003872	6-phosphofructokinase activity	1/488	20/17827	0.426167	0.804477	Niben261Chr03g1555004	Niben261Chr03g1555004	1	0		1	Niben261Chr03g1555004
MF	GO:0004888	transmembrane signaling receptor activity	1/488	20/17827	0.426167	0.804477	Niben261Chr16g0236038	Niben261Chr16g0236038	1	0		1	Niben261Chr16g0236038
MF	GO:0004970	ionotropic glutamate receptor activity	1/488	20/17827	0.426167	0.804477	Niben261Chr16g0236038	Niben261Chr16g0236038	1	0		1	Niben261Chr16g0236038
MF	GO:0005230	extracellular ligand-gated ion channel activity	1/488	20/17827	0.426167	0.804477	Niben261Chr16g0236038	Niben261Chr16g0236038	1	0		1	Niben261Chr16g0236038
MF	GO:0008066	glutamate receptor activity	1/488	20/17827	0.426167	0.804477	Niben261Chr16g0236038	Niben261Chr16g0236038	1	0		1	Niben261Chr16g0236038
MF	GO:0016161	beta-amylase activity	1/488	20/17827	0.426167	0.804477	Niben261Chr06g1186001	Niben261Chr06g1186001	1	0		1	Niben261Chr06g1186001
MF	GO:0022824	transmitter-gated ion channel activity	1/488	20/17827	0.426167	0.804477	Niben261Chr16g0236038	Niben261Chr16g0236038	1	0		1	Niben261Chr16g0236038
MF	GO:0022835	transmitter-gated channel activity	1/488	20/17827	0.426167	0.804477	Niben261Chr16g0236038	Niben261Chr16g0236038	1	0		1	Niben261Chr16g0236038
MF	GO:0030594	neurotransmitter receptor activity	1/488	20/17827	0.426167	0.804477	Niben261Chr16g0236038	Niben261Chr16g0236038	1	0		1	Niben261Chr16g0236038
MF	GO:0046912	transferase activity, transferring acyl groups, acyl groups converted into alkyl on transfer	1/488	20/17827	0.426167	0.804477	Niben261Chr06g0401014	Niben261Chr06g0401014	1	0		1	Niben261Chr06g0401014
MF	GO:0015103	inorganic anion transmembrane transporter activity	2/488	53/17827	0.427928	0.804477	Niben261Chr17g0387001/Niben261Chr05g0124003	Niben261Chr17g0387001/Niben261Chr05g0124003	2	0		2	Niben261Chr17g0387001/Niben261Chr05g0124003
MF	GO:0015276	ligand-gated ion channel activity	1/488	21/17827	0.441893	0.804477	Niben261Chr16g0236038	Niben261Chr16g0236038	1	0		1	Niben261Chr16g0236038
MF	GO:0022834	ligand-gated channel activity	1/488	21/17827	0.441893	0.804477	Niben261Chr16g0236038	Niben261Chr16g0236038	1	0		1	Niben261Chr16g0236038
MF	GO:0008236	serine-type peptidase activity	6/488	195/17827	0.444233	0.804477	Niben261Chr14g1384008/Niben261Chr14g1381017/Niben261Chr10g0675014/Niben261Chr07g1258010/Niben261Chr02g0340005/Niben261Chr11g0476003	Niben261Chr14g1384008/Niben261Chr14g1381017/Niben261Chr10g0675014/Niben261Chr07g1258010/Niben261Chr02g0340005/Niben261Chr11g0476003	6	2	Niben261Chr02g0340005/Niben261Chr11g0476003	4	Niben261Chr14g1384008/Niben261Chr14g1381017/Niben261Chr10g0675014/Niben261Chr07g1258010
MF	GO:0017171	serine hydrolase activity	6/488	195/17827	0.444233	0.804477	Niben261Chr14g1384008/Niben261Chr14g1381017/Niben261Chr10g0675014/Niben261Chr07g1258010/Niben261Chr02g0340005/Niben261Chr11g0476003	Niben261Chr14g1384008/Niben261Chr14g1381017/Niben261Chr10g0675014/Niben261Chr07g1258010/Niben261Chr02g0340005/Niben261Chr11g0476003	6	2	Niben261Chr02g0340005/Niben261Chr11g0476003	4	Niben261Chr14g1384008/Niben261Chr14g1381017/Niben261Chr10g0675014/Niben261Chr07g1258010
MF	GO:0008443	phosphofructokinase activity	1/488	22/17827	0.457189	0.804477	Niben261Chr03g1555004	Niben261Chr03g1555004	1	0		1	Niben261Chr03g1555004
MF	GO:0015095	magnesium ion transmembrane transporter activity	1/488	22/17827	0.457189	0.804477	Niben261Chr17g0086012	Niben261Chr17g0086012	1	0		1	Niben261Chr17g0086012
MF	GO:0019200	carbohydrate kinase activity	1/488	22/17827	0.457189	0.804477	Niben261Chr03g1555004	Niben261Chr03g1555004	1	0		1	Niben261Chr03g1555004
MF	GO:1901681	sulfur compound binding	1/488	22/17827	0.457189	0.804477	Niben261Chr13g0994005	Niben261Chr13g0994005	1	0		1	Niben261Chr13g0994005
MF	GO:0008194	UDP-glycosyltransferase activity	5/488	166/17827	0.478137	0.832114	Niben261Chr13g0813007/Niben261Chr08g1314002/novel.1709/Niben261Chr12g0528019/Niben261Chr06g0520008	Niben261Chr13g0813007/Niben261Chr08g1314002/-/Niben261Chr12g0528019/Niben261Chr06g0520008	5	1	Niben261Chr12g0528019	4	Niben261Chr13g0813007/Niben261Chr08g1314002/novel.1709/Niben261Chr06g0520008
MF	GO:0008509	anion transmembrane transporter activity	2/488	59/17827	0.482985	0.832114	Niben261Chr17g0387001/Niben261Chr05g0124003	Niben261Chr17g0387001/Niben261Chr05g0124003	2	0		2	Niben261Chr17g0387001/Niben261Chr05g0124003
MF	GO:0004427	inorganic diphosphatase activity	1/488	24/17827	0.486537	0.832114	Niben261Chr03g0002006	Niben261Chr03g0002006	1	0		1	Niben261Chr03g0002006
MF	GO:0070011	peptidase activity, acting on L-amino acid peptides	14/488	497/17827	0.494971	0.837837	Niben261Chr06g0608015/Niben261Chr14g1384008/Niben261Chr19g0265003/Niben261Chr16g0225008/Niben261Chr14g1381017/novel.5700/Niben261Chr16g0224011/Niben261Chr16g0224012/Niben261Chr07g1286014/Niben261Chr10g0675014/Niben261Chr07g1258010/Niben261Chr02g0340005/Niben261Chr11g0476003/Niben261Chr11g1171006	Niben261Chr06g0608015/Niben261Chr14g1384008/Niben261Chr19g0265003/Niben261Chr16g0225008/Niben261Chr14g1381017/-/Niben261Chr16g0224011/Niben261Chr16g0224012/Niben261Chr07g1286014/Niben261Chr10g0675014/Niben261Chr07g1258010/Niben261Chr02g0340005/Niben261Chr11g0476003/Niben261Chr11g1171006	14	4	Niben261Chr19g0265003/Niben261Chr02g0340005/Niben261Chr11g0476003/Niben261Chr11g1171006	10	Niben261Chr06g0608015/Niben261Chr14g1384008/Niben261Chr16g0225008/Niben261Chr14g1381017/novel.5700/Niben261Chr16g0224011/Niben261Chr16g0224012/Niben261Chr07g1286014/Niben261Chr10g0675014/Niben261Chr07g1258010
MF	GO:0015077	monovalent inorganic cation transmembrane transporter activity	5/488	170/17827	0.49904	0.837837	Niben261Chr05g0536007/Niben261Chr05g1366011/Niben261Chr12g0287027/Niben261Chr14g0756002/Niben261Chr07g0438001	Niben261Chr05g0536007/Niben261Chr05g1366011/Niben261Chr12g0287027/Niben261Chr14g0756002/Niben261Chr07g0438001	5	0		5	Niben261Chr05g0536007/Niben261Chr05g1366011/Niben261Chr12g0287027/Niben261Chr14g0756002/Niben261Chr07g0438001
MF	GO:0005543	phospholipid binding	2/488	62/17827	0.509262	0.839981	Niben261Chr10g0377012/Niben261Chr09g1038012	Niben261Chr10g0377012/Niben261Chr09g1038012	2	0		2	Niben261Chr10g0377012/Niben261Chr09g1038012
MF	GO:0008324	cation transmembrane transporter activity	8/488	282/17827	0.509497	0.839981	Niben261Chr05g0536007/Niben261Chr05g0827010/Niben261Chr17g0086012/Niben261Chr05g1366011/Niben261Chr12g0287027/Niben261Chr02g0419002/Niben261Chr14g0756002/Niben261Chr07g0438001	Niben261Chr05g0536007/Niben261Chr05g0827010/Niben261Chr17g0086012/Niben261Chr05g1366011/Niben261Chr12g0287027/Niben261Chr02g0419002/Niben261Chr14g0756002/Niben261Chr07g0438001	8	1	Niben261Chr02g0419002	7	Niben261Chr05g0536007/Niben261Chr05g0827010/Niben261Chr17g0086012/Niben261Chr05g1366011/Niben261Chr12g0287027/Niben261Chr14g0756002/Niben261Chr07g0438001
MF	GO:0016701	oxidoreductase activity, acting on single donors with incorporation of molecular oxygen	2/488	63/17827	0.517825	0.846089	Niben261Chr10g0616010/Niben261Chr09g0995011	Niben261Chr10g0616010/Niben261Chr09g0995011	2	0		2	Niben261Chr10g0616010/Niben261Chr09g0995011
MF	GO:0016307	phosphatidylinositol phosphate kinase activity	1/488	28/17827	0.540567	0.867752	Niben261Chr17g1120002	Niben261Chr17g1120002	1	0		1	Niben261Chr17g1120002
MF	GO:0140103	catalytic activity, acting on a glycoprotein	1/488	28/17827	0.540567	0.867752	Niben261Chr06g1231005	Niben261Chr06g1231005	1	0		1	Niben261Chr06g1231005
MF	GO:0004252	serine-type endopeptidase activity	3/488	108/17827	0.570644	0.908068	Niben261Chr14g1384008/Niben261Chr14g1381017/Niben261Chr07g1258010	Niben261Chr14g1384008/Niben261Chr14g1381017/Niben261Chr07g1258010	3	0		3	Niben261Chr14g1384008/Niben261Chr14g1381017/Niben261Chr07g1258010
MF	GO:0016746	transferase activity, transferring acyl groups	6/488	224/17827	0.578836	0.913164	Niben261Chr17g0620012/Niben261Chr06g0401014/Niben261Chr09g0105009/Niben261Chr19g0257004/Niben261Chr01g0076002/Niben261Chr09g1049004	Niben261Chr17g0620012/Niben261Chr06g0401014/Niben261Chr09g0105009/Niben261Chr19g0257004/Niben261Chr01g0076002/Niben261Chr09g1049004	6	0		6	Niben261Chr17g0620012/Niben261Chr06g0401014/Niben261Chr09g0105009/Niben261Chr19g0257004/Niben261Chr01g0076002/Niben261Chr09g1049004
MF	GO:0008374	O-acyltransferase activity	1/488	32/17827	0.588922	0.921134	Niben261Chr01g0076002	Niben261Chr01g0076002	1	0		1	Niben261Chr01g0076002
MF	GO:0008289	lipid binding	3/488	114/17827	0.6074	0.941985	Niben261Chr10g0377012/Niben261Chr09g1038012/Niben261Chr06g0040004	Niben261Chr10g0377012/Niben261Chr09g1038012/Niben261Chr06g0040004	3	1	Niben261Chr06g0040004	2	Niben261Chr10g0377012/Niben261Chr09g1038012
MF	GO:0050662	coenzyme binding	11/488	436/17827	0.651326	0.972353	Niben261Chr01g1565004/Niben261Chr13g0994005/Niben261Chr18g0684004/Niben261Chr08g0323012/Niben261Chr09g1122007/Niben261Chr07g1483003/Niben261Chr07g0828009/Niben261Chr05g0879001/Niben261Chr18g0571013/Niben261Chr14g0328001/Niben261Chr01g1065004	Niben261Chr01g1565004/Niben261Chr13g0994005/Niben261Chr18g0684004/Niben261Chr08g0323012/Niben261Chr09g1122007/Niben261Chr07g1483003/Niben261Chr07g0828009/Niben261Chr05g0879001/Niben261Chr18g0571013/Niben261Chr14g0328001/Niben261Chr01g1065004	11	1	Niben261Chr14g0328001	10	Niben261Chr01g1565004/Niben261Chr13g0994005/Niben261Chr18g0684004/Niben261Chr08g0323012/Niben261Chr09g1122007/Niben261Chr07g1483003/Niben261Chr07g0828009/Niben261Chr05g0879001/Niben261Chr18g0571013/Niben261Chr01g1065004
MF	GO:0008378	galactosyltransferase activity	1/488	38/17827	0.652098	0.972353	Niben261Chr14g1157014	Niben261Chr14g1157014	1	0		1	Niben261Chr14g1157014
MF	GO:0022836	gated channel activity	1/488	38/17827	0.652098	0.972353	Niben261Chr16g0236038	Niben261Chr16g0236038	1	0		1	Niben261Chr16g0236038
MF	GO:0022839	ion gated channel activity	1/488	38/17827	0.652098	0.972353	Niben261Chr16g0236038	Niben261Chr16g0236038	1	0		1	Niben261Chr16g0236038
MF	GO:0022890	inorganic cation transmembrane transporter activity	6/488	242/17827	0.653549	0.972353	Niben261Chr05g0536007/Niben261Chr17g0086012/Niben261Chr05g1366011/Niben261Chr12g0287027/Niben261Chr14g0756002/Niben261Chr07g0438001	Niben261Chr05g0536007/Niben261Chr17g0086012/Niben261Chr05g1366011/Niben261Chr12g0287027/Niben261Chr14g0756002/Niben261Chr07g0438001	6	0		6	Niben261Chr05g0536007/Niben261Chr17g0086012/Niben261Chr05g1366011/Niben261Chr12g0287027/Niben261Chr14g0756002/Niben261Chr07g0438001
MF	GO:0004497	monooxygenase activity	1/488	40/17827	0.670924	0.982233	Niben261Chr10g0616010	Niben261Chr10g0616010	1	0		1	Niben261Chr10g0616010
MF	GO:0008171	O-methyltransferase activity	1/488	40/17827	0.670924	0.982233	Niben261Chr01g0531006	Niben261Chr01g0531006	1	0		1	Niben261Chr01g0531006
MF	GO:0015035	protein disulfide oxidoreductase activity	1/488	42/17827	0.688734	0.992428	novel.4337	-	1	0		1	novel.4337
MF	GO:0015036	disulfide oxidoreductase activity	1/488	42/17827	0.688734	0.992428	novel.4337	-	1	0		1	novel.4337
MF	GO:0003682	chromatin binding	1/488	43/17827	0.697275	0.993242	Niben261Chr02g0106024	Niben261Chr02g0106024	1	1	Niben261Chr02g0106024	0
MF	GO:0016702	oxidoreductase activity, acting on single donors with incorporation of molecular oxygen, incorporation of two atoms of oxygen	1/488	44/17827	0.705582	0.993242	Niben261Chr09g0995011	Niben261Chr09g0995011	1	0		1	Niben261Chr09g0995011
MF	GO:0051213	dioxygenase activity	1/488	44/17827	0.705582	0.993242	Niben261Chr09g0995011	Niben261Chr09g0995011	1	0		1	Niben261Chr09g0995011
MF	GO:0016887	ATPase activity	6/488	263/17827	0.729668	0.999728	Niben261Chr10g1078023/Niben261Chr03g1350005/Niben261Chr05g0371003/Niben261Chr19g1250015/Niben261Chr01g0459008/Niben261Chr11g1084001	Niben261Chr10g1078023/Niben261Chr03g1350005/Niben261Chr05g0371003/Niben261Chr19g1250015/Niben261Chr01g0459008/Niben261Chr11g1084001	6	2	Niben261Chr03g1350005/Niben261Chr05g0371003	4	Niben261Chr10g1078023/Niben261Chr19g1250015/Niben261Chr01g0459008/Niben261Chr11g1084001
MF	GO:0004298	threonine-type endopeptidase activity	1/488	48/17827	0.736596	0.999728	Niben261Chr11g1171006	Niben261Chr11g1171006	1	1	Niben261Chr11g1171006	0
MF	GO:0016627	oxidoreductase activity, acting on the CH-CH group of donors	1/488	48/17827	0.736596	0.999728	Niben261Chr07g0077009	Niben261Chr07g0077009	1	0		1	Niben261Chr07g0077009
MF	GO:0070003	threonine-type peptidase activity	1/488	48/17827	0.736596	0.999728	Niben261Chr11g1171006	Niben261Chr11g1171006	1	1	Niben261Chr11g1171006	0
MF	GO:0004871	signal transducer activity	1/488	50/17827	0.750858	0.999728	Niben261Chr16g0236038	Niben261Chr16g0236038	1	0		1	Niben261Chr16g0236038
MF	GO:0038023	signaling receptor activity	1/488	50/17827	0.750858	0.999728	Niben261Chr16g0236038	Niben261Chr16g0236038	1	0		1	Niben261Chr16g0236038
MF	GO:0060089	molecular transducer activity	1/488	50/17827	0.750858	0.999728	Niben261Chr16g0236038	Niben261Chr16g0236038	1	0		1	Niben261Chr16g0236038
MF	GO:0016879	ligase activity, forming carbon-nitrogen bonds	1/488	53/17827	0.770818	0.999728	Niben261Chr10g1091006	Niben261Chr10g1091006	1	0		1	Niben261Chr10g1091006
MF	GO:0016616	oxidoreductase activity, acting on the CH-OH group of donors, NAD or NADP as acceptor	3/488	157/17827	0.807618	0.999728	Niben261Chr14g0954001/Niben261Chr07g1483003/Niben261Chr07g0828009	Niben261Chr14g0954001/Niben261Chr07g1483003/Niben261Chr07g0828009	3	0		3	Niben261Chr14g0954001/Niben261Chr07g1483003/Niben261Chr07g0828009
MF	GO:0004386	helicase activity	1/488	68/17827	0.84908	0.999728	Niben261Chr13g1231008	Niben261Chr13g1231008	1	0		1	Niben261Chr13g1231008
MF	GO:0016667	oxidoreductase activity, acting on a sulfur group of donors	1/488	68/17827	0.84908	0.999728	novel.4337	-	1	0		1	novel.4337
MF	GO:0030234	enzyme regulator activity	4/488	219/17827	0.85368	0.999728	Niben261Chr10g0135007/Niben261Chr08g0530007/Niben261Chr10g0130005/Niben261Chr10g0137007	Niben261Chr10g0135007/Niben261Chr08g0530007/Niben261Chr10g0130005/Niben261Chr10g0137007	4	1	Niben261Chr08g0530007	3	Niben261Chr10g0135007/Niben261Chr10g0130005/Niben261Chr10g0137007
MF	GO:0016614	oxidoreductase activity, acting on CH-OH group of donors	3/488	174/17827	0.858913	0.999728	Niben261Chr14g0954001/Niben261Chr07g1483003/Niben261Chr07g0828009	Niben261Chr14g0954001/Niben261Chr07g1483003/Niben261Chr07g0828009	3	0		3	Niben261Chr14g0954001/Niben261Chr07g1483003/Niben261Chr07g0828009
MF	GO:0016791	phosphatase activity	1/488	75/17827	0.875827	0.999728	Niben261Chr08g0046003	Niben261Chr08g0046003	1	0		1	Niben261Chr08g0046003
MF	GO:0035251	UDP-glucosyltransferase activity	1/488	80/17827	0.891984	0.999728	Niben261Chr12g0528019	Niben261Chr12g0528019	1	1	Niben261Chr12g0528019	0
MF	GO:0051287	NAD binding	1/488	81/17827	0.894954	0.999728	Niben261Chr07g1483003	Niben261Chr07g1483003	1	0		1	Niben261Chr07g1483003
MF	GO:0008092	cytoskeletal protein binding	3/488	192/17827	0.899782	0.999728	Niben261Chr17g1393008/Niben261Chr03g1062002/Niben261Chr08g0164003	Niben261Chr17g1393008/Niben261Chr03g1062002/Niben261Chr08g0164003	3	2	Niben261Chr03g1062002/Niben261Chr08g0164003	1	Niben261Chr17g1393008
MF	GO:0003690	double-stranded DNA binding	1/488	83/17827	0.900652	0.999728	Niben261Chr12g1250003	Niben261Chr12g1250003	1	1	Niben261Chr12g1250003	0
MF	GO:0004175	endopeptidase activity	4/488	245/17827	0.906284	0.999728	Niben261Chr14g1384008/Niben261Chr14g1381017/Niben261Chr07g1258010/Niben261Chr11g1171006	Niben261Chr14g1384008/Niben261Chr14g1381017/Niben261Chr07g1258010/Niben261Chr11g1171006	4	1	Niben261Chr11g1171006	3	Niben261Chr14g1384008/Niben261Chr14g1381017/Niben261Chr07g1258010
MF	GO:0051082	unfolded protein binding	1/488	87/17827	0.911139	0.999728	Niben261Chr18g0858015	Niben261Chr18g0858015	1	0		1	Niben261Chr18g0858015
MF	GO:0046983	protein dimerization activity	9/488	485/17827	0.918122	0.999728	novel.6030/Niben261Chr19g0746003/novel.58/Niben261Chr02g1282010/Niben261Chr19g0038009/novel.6095/Niben261Chr04g0962013/Niben261Chr17g1095010/Niben261Chr01g0531006	-/Niben261Chr19g0746003/-/Niben261Chr02g1282010/Niben261Chr19g0038009/-/Niben261Chr04g0962013/Niben261Chr17g1095010/Niben261Chr01g0531006	9	4	Niben261Chr19g0746003/novel.58/Niben261Chr02g1282010/Niben261Chr04g0962013	5	novel.6030/Niben261Chr19g0038009/novel.6095/Niben261Chr17g1095010/Niben261Chr01g0531006
MF	GO:0003899	DNA-directed 5'-3' RNA polymerase activity	1/488	90/17827	0.918273	0.999728	Niben261Chr03g0012007	Niben261Chr03g0012007	1	0		1	Niben261Chr03g0012007
MF	GO:0034062	5'-3' RNA polymerase activity	1/488	98/17827	0.934624	0.999728	Niben261Chr03g0012007	Niben261Chr03g0012007	1	0		1	Niben261Chr03g0012007
MF	GO:0097747	RNA polymerase activity	1/488	98/17827	0.934624	0.999728	Niben261Chr03g0012007	Niben261Chr03g0012007	1	0		1	Niben261Chr03g0012007
MF	GO:0098772	molecular function regulator	4/488	270/17827	0.940325	0.999728	Niben261Chr10g0135007/Niben261Chr08g0530007/Niben261Chr10g0130005/Niben261Chr10g0137007	Niben261Chr10g0135007/Niben261Chr08g0530007/Niben261Chr10g0130005/Niben261Chr10g0137007	4	1	Niben261Chr08g0530007	3	Niben261Chr10g0135007/Niben261Chr10g0130005/Niben261Chr10g0137007
MF	GO:0019899	enzyme binding	1/488	103/17827	0.943141	0.999728	Niben261Chr05g1037002	Niben261Chr05g1037002	1	1	Niben261Chr05g1037002	0
MF	GO:0042626	ATPase activity, coupled to transmembrane movement of substances	1/488	105/17827	0.946229	0.999728	Niben261Chr01g0459008	Niben261Chr01g0459008	1	0		1	Niben261Chr01g0459008
MF	GO:0043492	ATPase activity, coupled to movement of substances	1/488	105/17827	0.946229	0.999728	Niben261Chr01g0459008	Niben261Chr01g0459008	1	0		1	Niben261Chr01g0459008
MF	GO:0046873	metal ion transmembrane transporter activity	1/488	106/17827	0.94771	0.999728	Niben261Chr17g0086012	Niben261Chr17g0086012	1	0		1	Niben261Chr17g0086012
MF	GO:0001883	purine nucleoside binding	6/488	379/17827	0.949875	0.999728	Niben261Chr07g0358002/Niben261Chr13g1364019/Niben261Chr14g0751012/Niben261Chr07g0480003/Niben261Chr17g1533026/Niben261Chr14g0173003	Niben261Chr07g0358002/Niben261Chr13g1364019/Niben261Chr14g0751012/Niben261Chr07g0480003/Niben261Chr17g1533026/Niben261Chr14g0173003	6	2	Niben261Chr14g0751012/Niben261Chr14g0173003	4	Niben261Chr07g0358002/Niben261Chr13g1364019/Niben261Chr07g0480003/Niben261Chr17g1533026
MF	GO:0005525	GTP binding	6/488	379/17827	0.949875	0.999728	Niben261Chr07g0358002/Niben261Chr13g1364019/Niben261Chr14g0751012/Niben261Chr07g0480003/Niben261Chr17g1533026/Niben261Chr14g0173003	Niben261Chr07g0358002/Niben261Chr13g1364019/Niben261Chr14g0751012/Niben261Chr07g0480003/Niben261Chr17g1533026/Niben261Chr14g0173003	6	2	Niben261Chr14g0751012/Niben261Chr14g0173003	4	Niben261Chr07g0358002/Niben261Chr13g1364019/Niben261Chr07g0480003/Niben261Chr17g1533026
MF	GO:0032549	ribonucleoside binding	6/488	379/17827	0.949875	0.999728	Niben261Chr07g0358002/Niben261Chr13g1364019/Niben261Chr14g0751012/Niben261Chr07g0480003/Niben261Chr17g1533026/Niben261Chr14g0173003	Niben261Chr07g0358002/Niben261Chr13g1364019/Niben261Chr14g0751012/Niben261Chr07g0480003/Niben261Chr17g1533026/Niben261Chr14g0173003	6	2	Niben261Chr14g0751012/Niben261Chr14g0173003	4	Niben261Chr07g0358002/Niben261Chr13g1364019/Niben261Chr07g0480003/Niben261Chr17g1533026
MF	GO:0032550	purine ribonucleoside binding	6/488	379/17827	0.949875	0.999728	Niben261Chr07g0358002/Niben261Chr13g1364019/Niben261Chr14g0751012/Niben261Chr07g0480003/Niben261Chr17g1533026/Niben261Chr14g0173003	Niben261Chr07g0358002/Niben261Chr13g1364019/Niben261Chr14g0751012/Niben261Chr07g0480003/Niben261Chr17g1533026/Niben261Chr14g0173003	6	2	Niben261Chr14g0751012/Niben261Chr14g0173003	4	Niben261Chr07g0358002/Niben261Chr13g1364019/Niben261Chr07g0480003/Niben261Chr17g1533026
MF	GO:0032561	guanyl ribonucleotide binding	6/488	379/17827	0.949875	0.999728	Niben261Chr07g0358002/Niben261Chr13g1364019/Niben261Chr14g0751012/Niben261Chr07g0480003/Niben261Chr17g1533026/Niben261Chr14g0173003	Niben261Chr07g0358002/Niben261Chr13g1364019/Niben261Chr14g0751012/Niben261Chr07g0480003/Niben261Chr17g1533026/Niben261Chr14g0173003	6	2	Niben261Chr14g0751012/Niben261Chr14g0173003	4	Niben261Chr07g0358002/Niben261Chr13g1364019/Niben261Chr07g0480003/Niben261Chr17g1533026
MF	GO:0001882	nucleoside binding	6/488	381/17827	0.951496	0.999728	Niben261Chr07g0358002/Niben261Chr13g1364019/Niben261Chr14g0751012/Niben261Chr07g0480003/Niben261Chr17g1533026/Niben261Chr14g0173003	Niben261Chr07g0358002/Niben261Chr13g1364019/Niben261Chr14g0751012/Niben261Chr07g0480003/Niben261Chr17g1533026/Niben261Chr14g0173003	6	2	Niben261Chr14g0751012/Niben261Chr14g0173003	4	Niben261Chr07g0358002/Niben261Chr13g1364019/Niben261Chr07g0480003/Niben261Chr17g1533026
MF	GO:0003924	GTPase activity	4/488	285/17827	0.954912	0.999728	Niben261Chr07g0358002/Niben261Chr07g0480003/Niben261Chr17g1533026/Niben261Chr14g0173003	Niben261Chr07g0358002/Niben261Chr07g0480003/Niben261Chr17g1533026/Niben261Chr14g0173003	4	1	Niben261Chr14g0173003	3	Niben261Chr07g0358002/Niben261Chr07g0480003/Niben261Chr17g1533026
MF	GO:0004521	endoribonuclease activity	1/488	112/17827	0.955777	0.999728	Niben261Chr19g1042003	Niben261Chr19g1042003	1	0		1	Niben261Chr19g1042003
MF	GO:0019001	guanyl nucleotide binding	6/488	390/17827	0.958223	0.999728	Niben261Chr07g0358002/Niben261Chr13g1364019/Niben261Chr14g0751012/Niben261Chr07g0480003/Niben261Chr17g1533026/Niben261Chr14g0173003	Niben261Chr07g0358002/Niben261Chr13g1364019/Niben261Chr14g0751012/Niben261Chr07g0480003/Niben261Chr17g1533026/Niben261Chr14g0173003	6	2	Niben261Chr14g0751012/Niben261Chr14g0173003	4	Niben261Chr07g0358002/Niben261Chr13g1364019/Niben261Chr07g0480003/Niben261Chr17g1533026
MF	GO:0015399	primary active transmembrane transporter activity	1/488	118/17827	0.962602	0.999728	Niben261Chr01g0459008	Niben261Chr01g0459008	1	0		1	Niben261Chr01g0459008
MF	GO:0015405	P-P-bond-hydrolysis-driven transmembrane transporter activity	1/488	118/17827	0.962602	0.999728	Niben261Chr01g0459008	Niben261Chr01g0459008	1	0		1	Niben261Chr01g0459008
MF	GO:0004519	endonuclease activity	1/488	124/17827	0.968376	0.999728	Niben261Chr19g1042003	Niben261Chr19g1042003	1	0		1	Niben261Chr19g1042003
MF	GO:0008017	microtubule binding	1/488	128/17827	0.971721	0.999728	Niben261Chr08g0164003	Niben261Chr08g0164003	1	1	Niben261Chr08g0164003	0
MF	GO:0042623	ATPase activity, coupled	1/488	129/17827	0.972501	0.999728	Niben261Chr01g0459008	Niben261Chr01g0459008	1	0		1	Niben261Chr01g0459008
MF	GO:0004540	ribonuclease activity	1/488	130/17827	0.973259	0.999728	Niben261Chr19g1042003	Niben261Chr19g1042003	1	0		1	Niben261Chr19g1042003
MF	GO:0042578	phosphoric ester hydrolase activity	1/488	136/17827	0.97739	0.999728	Niben261Chr08g0046003	Niben261Chr08g0046003	1	0		1	Niben261Chr08g0046003
MF	GO:0015631	tubulin binding	1/488	141/17827	0.980341	0.999728	Niben261Chr08g0164003	Niben261Chr08g0164003	1	1	Niben261Chr08g0164003	0
MF	GO:0003774	motor activity	1/488	142/17827	0.980884	0.999728	Niben261Chr02g0044001	Niben261Chr02g0044001	1	1	Niben261Chr02g0044001	0
MF	GO:0008168	methyltransferase activity	4/488	338/17827	0.984044	0.999728	Niben261Chr11g1298003/Niben261Chr02g0106024/Niben261Chr08g0847011/Niben261Chr01g0531006	Niben261Chr11g1298003/Niben261Chr02g0106024/Niben261Chr08g0847011/Niben261Chr01g0531006	4	2	Niben261Chr02g0106024/Niben261Chr08g0847011	2	Niben261Chr11g1298003/Niben261Chr01g0531006
MF	GO:0016741	transferase activity, transferring one-carbon groups	4/488	356/17827	0.988953	0.999728	Niben261Chr11g1298003/Niben261Chr02g0106024/Niben261Chr08g0847011/Niben261Chr01g0531006	Niben261Chr11g1298003/Niben261Chr02g0106024/Niben261Chr08g0847011/Niben261Chr01g0531006	4	2	Niben261Chr02g0106024/Niben261Chr08g0847011	2	Niben261Chr11g1298003/Niben261Chr01g0531006
MF	GO:0004518	nuclease activity	1/488	187/17827	0.994582	0.999728	Niben261Chr19g1042003	Niben261Chr19g1042003	1	0		1	Niben261Chr19g1042003
MF	GO:0016779	nucleotidyltransferase activity	1/488	189/17827	0.994877	0.999728	Niben261Chr03g0012007	Niben261Chr03g0012007	1	0		1	Niben261Chr03g0012007
MF	GO:0016874	ligase activity	1/488	191/17827	0.995157	0.999728	Niben261Chr10g1091006	Niben261Chr10g1091006	1	0		1	Niben261Chr10g1091006
MF	GO:0140098	catalytic activity, acting on RNA	2/488	381/17827	0.999728	0.999728	Niben261Chr03g0012007/Niben261Chr19g1042003	Niben261Chr03g0012007/Niben261Chr19g1042003	2	0		2	Niben261Chr03g0012007/Niben261Chr19g1042003
