# Supplementary material for: Regulation of Disease-Resistance Genes against CWMV Infection by NbHAG1-Mediated H3K36ac
Source: Int J Mol Sci. 2024 Feb 28;25(5):2800. doi: 10.3390/ijms25052800 (PMC10931728; doi:10.3390/ijms25052800)
Supplement: Supplementary file 1 [file ijms-25-02800-s001.zip › ijms-2871725-supplementary/Table S6. Raw data from KEGG enrichment analysis of DEGs in OEH vs Nb.xls]

## Sheet: Sheet1
Table S6. Raw data from KEGG enrichment analysis of DEGs in OEH and Nb.
KEGGID	Description	GeneRatio	BgRatio	pvalue	padj	geneID	geneName	keggID	Count	Up	Up_Gene_id	Down	Down_Gene_id
ath00480	Glutathione metabolism	14/204	153/9640	4.16854e-06	0.000375168	Niben261Chr16g1121001/Niben261Chr09g0690024/Niben261Chr01g1761005/Niben261Chr14g0090022/Niben261Chr16g0884010/Niben261Chr02g0478001/Niben261Chr16g0884015/Niben261Chr05g0846008/novel.4431/Niben261Chr12g0343005/Niben261Chr16g0884007/Niben261Chr19g1019006/Niben261Chr17g1359002/Niben261Chr09g0647005	Niben261Chr16g1121001/Niben261Chr09g0690024/Niben261Chr01g1761005/Niben261Chr14g0090022/Niben261Chr16g0884010/Niben261Chr02g0478001/Niben261Chr16g0884015/Niben261Chr05g0846008/-/Niben261Chr12g0343005/Niben261Chr16g0884007/Niben261Chr19g1019006/Niben261Chr17g1359002/Niben261Chr09g0647005	ath:AT1G17180/ath:AT3G09270/ath:AT3G09270/ath:AT4G29210/ath:AT3G09270/ath:AT1G17180/ath:AT3G09270/ath:AT3G09270/ath:AT2G29420/ath:AT3G09270/ath:AT3G09270/ath:AT1G74590/ath:AT2G29420/ath:AT3G09270	14	0		14	Niben261Chr16g1121001/Niben261Chr09g0690024/Niben261Chr01g1761005/Niben261Chr14g0090022/Niben261Chr16g0884010/Niben261Chr02g0478001/Niben261Chr16g0884015/Niben261Chr05g0846008/novel.4431/Niben261Chr12g0343005/Niben261Chr16g0884007/Niben261Chr19g1019006/Niben261Chr17g1359002/Niben261Chr09g0647005
ath00196	Photosynthesis - antenna proteins	8/204	63/9640	5.00222e-05	0.002251	Niben261Chr19g1221006/Niben261Chr19g1221005/Niben261Chr19g1221014/novel.5874/Niben261Chr19g1221034/Niben261Chr17g0759031/Niben261Chr17g0569022/Niben261Chr17g0569005	Niben261Chr19g1221006/Niben261Chr19g1221005/Niben261Chr19g1221014/-/Niben261Chr19g1221034/Niben261Chr17g0759031/Niben261Chr17g0569022/Niben261Chr17g0569005	ath:AT1G29930/ath:AT2G34420/ath:AT1G29930/ath:AT1G29930/ath:AT1G29930/ath:AT1G29930/ath:AT2G34420/ath:AT1G29930	8	8	Niben261Chr19g1221006/Niben261Chr19g1221005/Niben261Chr19g1221014/novel.5874/Niben261Chr19g1221034/Niben261Chr17g0759031/Niben261Chr17g0569022/Niben261Chr17g0569005	0
ath04626	Plant-pathogen interaction	18/204	336/9640	0.000270128	0.00810383	Niben261Chr14g0841005/Niben261Chr13g0055007/Niben261Chr13g0060013/Niben261Chr17g1112002/novel.2058/Niben261Chr15g1181003/Niben261Chr09g0105009/Niben261Chr03g1073005/Niben261Chr15g0795003/Niben261Chr13g0643002/Niben261Chr04g1630003/Niben261Scf01441g0000001/Niben261Chr03g0170029/Niben261Chr19g0221003/Niben261Chr02g1378002/Niben261Chr07g0448012/Niben261Chr14g1158001/Niben261Chr06g0182025	Niben261Chr14g0841005/Niben261Chr13g0055007/Niben261Chr13g0060013/Niben261Chr17g1112002/-/Niben261Chr15g1181003/Niben261Chr09g0105009/Niben261Chr03g1073005/Niben261Chr15g0795003/Niben261Chr13g0643002/Niben261Chr04g1630003/Niben261Scf01441g0000001/Niben261Chr03g0170029/Niben261Chr19g0221003/Niben261Chr02g1378002/Niben261Chr07g0448012/Niben261Chr14g1158001/Niben261Chr06g0182025	ath:AT4G01010/ath:AT2G14580/ath:AT1G50060/ath:AT3G50770/ath:AT2G14580/ath:AT2G15680/ath:AT5G43760/ath:AT5G42380/ath:AT5G53130/ath:AT3G25070/ath:AT3G25070/ath:AT3G50770/ath:AT1G50700/ath:AT3G21630/ath:AT2G43290/ath:AT3G45640/ath:AT2G24610/ath:AT3G07040	18	2	Niben261Chr03g1073005/Niben261Chr06g0182025	16	Niben261Chr14g0841005/Niben261Chr13g0055007/Niben261Chr13g0060013/Niben261Chr17g1112002/novel.2058/Niben261Chr15g1181003/Niben261Chr09g0105009/Niben261Chr15g0795003/Niben261Chr13g0643002/Niben261Chr04g1630003/Niben261Scf01441g0000001/Niben261Chr03g0170029/Niben261Chr19g0221003/Niben261Chr02g1378002/Niben261Chr07g0448012/Niben261Chr14g1158001
ath00966	Glucosinolate biosynthesis	5/204	30/9640	0.000374177	0.00841899	Niben261Chr19g0944003/Niben261Chr19g0476003/Niben261Chr19g0475001/Niben261Chr18g0495001/Niben261Chr02g0778001	Niben261Chr19g0944003/Niben261Chr19g0476003/Niben261Chr19g0475001/Niben261Chr18g0495001/Niben261Chr02g0778001	ath:AT1G24100/ath:AT1G10070/ath:AT1G10070/ath:AT1G10070/ath:AT1G24100	5	0		5	Niben261Chr19g0944003/Niben261Chr19g0476003/Niben261Chr19g0475001/Niben261Chr18g0495001/Niben261Chr02g0778001
ath04016	MAPK signaling pathway - plant	15/204	270/9640	0.000604557	0.010882	Niben261Chr13g0055007/Niben261Chr07g1178010/Niben261Chr13g0060013/novel.2058/Niben261Chr14g0368003/Niben261Chr19g0661007/Niben261Chr10g1175005/Niben261Chr01g0800003/Niben261Chr18g1375009/Niben261Chr09g1122007/Niben261Chr13g0010010/Niben261Chr16g0548017/Niben261Chr15g1259003/Niben261Chr07g0448012/Niben261Chr12g0679014	Niben261Chr13g0055007/Niben261Chr07g1178010/Niben261Chr13g0060013/-/Niben261Chr14g0368003/Niben261Chr19g0661007/Niben261Chr10g1175005/Niben261Chr01g0800003/Niben261Chr18g1375009/Niben261Chr09g1122007/Niben261Chr13g0010010/Niben261Chr16g0548017/Niben261Chr15g1259003/Niben261Chr07g0448012/Niben261Chr12g0679014	ath:AT2G14580/ath:AT3G12500/ath:AT1G50060/ath:AT2G14580/ath:AT3G11410/ath:AT4G35090/ath:AT3G11410/ath:AT3G11410/ath:AT3G12500/ath:AT1G01480/ath:AT3G12500/ath:AT1G01360/ath:AT3G12500/ath:AT3G45640/ath:AT4G29810	15	1	Niben261Chr12g0679014	14	Niben261Chr13g0055007/Niben261Chr07g1178010/Niben261Chr13g0060013/novel.2058/Niben261Chr14g0368003/Niben261Chr19g0661007/Niben261Chr10g1175005/Niben261Chr01g0800003/Niben261Chr18g1375009/Niben261Chr09g1122007/Niben261Chr13g0010010/Niben261Chr16g0548017/Niben261Chr15g1259003/Niben261Chr07g0448012
ath00592	alpha-Linolenic acid metabolism	7/204	76/9640	0.00108981	0.0159489	Niben261Chr07g1479010/Niben261Chr02g1343006/Niben261Chr10g0654005/Niben261Chr04g0107024/Niben261Chr09g1310006/Niben261Chr07g0077009/Niben261Chr04g0107025	Niben261Chr07g1479010/Niben261Chr02g1343006/Niben261Chr10g0654005/Niben261Chr04g0107024/Niben261Chr09g1310006/Niben261Chr07g0077009/Niben261Chr04g0107025	ath:AT3G01420/ath:AT1G20510/ath:AT5G42650/ath:AT4G13010/ath:AT5G42650/ath:AT5G65110/ath:AT4G13010	7	0		7	Niben261Chr07g1479010/Niben261Chr02g1343006/Niben261Chr10g0654005/Niben261Chr04g0107024/Niben261Chr09g1310006/Niben261Chr07g0077009/Niben261Chr04g0107025
ath01210	2-Oxocarboxylic acid metabolism	9/204	124/9640	0.00124047	0.0159489	Niben261Chr19g0944003/Niben261Chr19g0476003/Niben261Chr13g0994005/Niben261Chr19g0475001/Niben261Chr05g0879001/Niben261Chr18g0495001/Niben261Chr05g0879002/Niben261Chr02g0778001/novel.1971	Niben261Chr19g0944003/Niben261Chr19g0476003/Niben261Chr13g0994005/Niben261Chr19g0475001/Niben261Chr05g0879001/Niben261Chr18g0495001/Niben261Chr05g0879002/Niben261Chr02g0778001/-	ath:AT1G24100/ath:AT1G10070/ath:AT3G48560/ath:AT1G10070/ath:AT2G30970/ath:AT1G10070/ath:AT2G30970/ath:AT1G24100/ath:AT2G43090	9	1	novel.1971	8	Niben261Chr19g0944003/Niben261Chr19g0476003/Niben261Chr13g0994005/Niben261Chr19g0475001/Niben261Chr05g0879001/Niben261Chr18g0495001/Niben261Chr05g0879002/Niben261Chr02g0778001
ath00906	Carotenoid biosynthesis	6/204	61/9640	0.00175914	0.0197903	Niben261Chr02g0064002/novel.6585/Niben261Chr18g1309013/Niben261Chr13g0256009/Niben261Chr09g1293012/Niben261Chr06g0808012	Niben261Chr02g0064002/-/Niben261Chr18g1309013/Niben261Chr13g0256009/Niben261Chr09g1293012/Niben261Chr06g0808012	ath:AT5G45340/ath:AT1G52340/ath:AT3G19270/ath:AT3G53130/ath:AT3G19270/ath:AT4G25700	6	4	Niben261Chr18g1309013/Niben261Chr13g0256009/Niben261Chr09g1293012/Niben261Chr06g0808012	2	Niben261Chr02g0064002/novel.6585
ath00270	Cysteine and methionine metabolism	12/204	229/9640	0.0034172	0.034172	Niben261Chr19g0476003/Niben261Chr02g0106024/Niben261Chr03g0320012/Niben261Chr19g0475001/Niben261Chr04g1767010/Niben261Chr09g1122007/Niben261Chr14g0954001/Niben261Chr14g0179001/Niben261Chr11g0179001/Niben261Chr05g0879001/Niben261Chr18g0495001/Niben261Chr05g0879002	Niben261Chr19g0476003/Niben261Chr02g0106024/Niben261Chr03g0320012/Niben261Chr19g0475001/Niben261Chr04g1767010/Niben261Chr09g1122007/Niben261Chr14g0954001/Niben261Chr14g0179001/Niben261Chr11g0179001/Niben261Chr05g0879001/Niben261Chr18g0495001/Niben261Chr05g0879002	ath:AT1G10070/ath:AT1G69770/ath:AT1G05010/ath:AT1G10070/ath:AT1G05010/ath:AT1G01480/ath:AT4G17260/ath:AT1G05010/ath:AT1G05010/ath:AT2G30970/ath:AT1G10070/ath:AT2G30970	12	1	Niben261Chr02g0106024	11	Niben261Chr19g0476003/Niben261Chr03g0320012/Niben261Chr19g0475001/Niben261Chr04g1767010/Niben261Chr09g1122007/Niben261Chr14g0954001/Niben261Chr14g0179001/Niben261Chr11g0179001/Niben261Chr05g0879001/Niben261Chr18g0495001/Niben261Chr05g0879002
ath00290	Valine, leucine and isoleucine biosynthesis	5/204	51/9640	0.00430825	0.0387742	Niben261Chr19g0476003/Niben261Chr13g0994005/Niben261Chr19g0475001/Niben261Chr18g0495001/novel.1971	Niben261Chr19g0476003/Niben261Chr13g0994005/Niben261Chr19g0475001/Niben261Chr18g0495001/-	ath:AT1G10070/ath:AT3G48560/ath:AT1G10070/ath:AT1G10070/ath:AT2G43090	5	1	novel.1971	4	Niben261Chr19g0476003/Niben261Chr13g0994005/Niben261Chr19g0475001/Niben261Chr18g0495001
ath00430	Taurine and hypotaurine metabolism	3/204	18/9640	0.00602675	0.0493098	Niben261Chr14g0090022/Niben261Chr18g0684004/Niben261Chr08g0323012	Niben261Chr14g0090022/Niben261Chr18g0684004/Niben261Chr08g0323012	ath:AT4G29210/ath:AT2G02010/ath:AT5G17330	3	0		3	Niben261Chr14g0090022/Niben261Chr18g0684004/Niben261Chr08g0323012
ath00940	Phenylpropanoid biosynthesis	10/204	216/9640	0.0164596	0.123447	Niben261Chr18g0191012/Niben261Chr15g1002003/Niben261Chr16g0561007/Niben261Chr07g1128012/Niben261Chr12g0933008/Niben261Chr09g0801010/Niben261Chr17g0723003/Niben261Chr17g1326001/Niben261Chr11g1324008/Niben261Chr16g0336001	Niben261Chr18g0191012/Niben261Chr15g1002003/Niben261Chr16g0561007/Niben261Chr07g1128012/Niben261Chr12g0933008/Niben261Chr09g0801010/Niben261Chr17g0723003/Niben261Chr17g1326001/Niben261Chr11g1324008/Niben261Chr16g0336001	ath:AT5G06720/ath:AT4G39330/ath:AT1G72680/ath:AT5G16120/ath:AT2G18980/ath:AT5G64120/ath:AT4G36220/ath:AT2G40890/ath:AT1G14550/ath:AT5G05340	10	1	Niben261Chr16g0561007	9	Niben261Chr18g0191012/Niben261Chr15g1002003/Niben261Chr07g1128012/Niben261Chr12g0933008/Niben261Chr09g0801010/Niben261Chr17g0723003/Niben261Chr17g1326001/Niben261Chr11g1324008/Niben261Chr16g0336001
ath00500	Starch and sucrose metabolism	12/204	287/9640	0.0188717	0.13065	Niben261Chr03g0190005/Niben261Chr14g0000003/Niben261Chr06g0164016/Niben261Chr01g1638006/Niben261Chr11g0684001/Niben261Chr06g1154012/Niben261Chr06g1186001/Niben261Chr13g0231009/Niben261Chr08g0692001/Niben261Chr12g0609008/Niben261Chr17g1072027/Niben261Scf00257g0000003	Niben261Chr03g0190005/Niben261Chr14g0000003/Niben261Chr06g0164016/Niben261Chr01g1638006/Niben261Chr11g0684001/Niben261Chr06g1154012/Niben261Chr06g1186001/Niben261Chr13g0231009/Niben261Chr08g0692001/Niben261Chr12g0609008/Niben261Chr17g1072027/Niben261Scf00257g0000003	ath:AT5G03650/ath:AT2G18700/ath:AT1G65610/ath:AT3G52600/ath:AT1G76130/ath:AT3G18080/ath:AT4G17090/ath:AT3G52600/ath:AT1G22880/ath:AT1G61810/ath:AT1G02850/ath:AT2G18700	12	2	Niben261Chr13g0231009/Niben261Chr08g0692001	10	Niben261Chr03g0190005/Niben261Chr14g0000003/Niben261Chr06g0164016/Niben261Chr01g1638006/Niben261Chr11g0684001/Niben261Chr06g1154012/Niben261Chr06g1186001/Niben261Chr12g0609008/Niben261Chr17g1072027/Niben261Scf00257g0000003
ath00944	Flavone and flavonol biosynthesis	2/204	12/9640	0.0255814	0.162254	Niben261Chr08g0024015/Niben261Chr06g0497004	Niben261Chr08g0024015/Niben261Chr06g0497004	ath:AT5G07990/ath:AT5G07990	2	0		2	Niben261Chr08g0024015/Niben261Chr06g0497004
ath00650	Butanoate metabolism	4/204	54/9640	0.0270423	0.162254	Niben261Chr06g0401014/Niben261Chr13g0994005/Niben261Chr18g0684004/Niben261Chr08g0323012	Niben261Chr06g0401014/Niben261Chr13g0994005/Niben261Chr18g0684004/Niben261Chr08g0323012	ath:AT4G11820/ath:AT3G48560/ath:AT2G02010/ath:AT5G17330	4	0		4	Niben261Chr06g0401014/Niben261Chr13g0994005/Niben261Chr18g0684004/Niben261Chr08g0323012
ath04712	Circadian rhythm - plant	5/204	83/9640	0.031058	0.174701	Niben261Chr14g0615001/Niben261Chr03g1735002/Niben261Chr05g0791009/Niben261Chr08g1041009/Niben261Chr05g0601003	Niben261Chr14g0615001/Niben261Chr03g1735002/Niben261Chr05g0791009/Niben261Chr08g1041009/Niben261Chr05g0601003	ath:AT1G65480/ath:AT1G65480/ath:AT5G02810/ath:AT1G65480/ath:AT2G32950	5	0		5	Niben261Chr14g0615001/Niben261Chr03g1735002/Niben261Chr05g0791009/Niben261Chr08g1041009/Niben261Chr05g0601003
ath00520	Amino sugar and nucleotide sugar metabolism	10/204	247/9640	0.0370493	0.192777	Niben261Chr07g1178010/Niben261Chr18g0008017/Niben261Chr08g1237022/Niben261Chr18g1375009/Niben261Chr13g0010010/Niben261Chr12g0827008/Niben261Chr06g1410008/Niben261Chr15g1422003/Niben261Chr15g1259003/Niben261Chr02g0162004	Niben261Chr07g1178010/Niben261Chr18g0008017/Niben261Chr08g1237022/Niben261Chr18g1375009/Niben261Chr13g0010010/Niben261Chr12g0827008/Niben261Chr06g1410008/Niben261Chr15g1422003/Niben261Chr15g1259003/Niben261Chr02g0162004	ath:AT3G12500/ath:AT4G19810/ath:AT3G54420/ath:AT3G12500/ath:AT3G12500/ath:AT1G30620/ath:AT4G19810/ath:AT3G54420/ath:AT3G12500/ath:AT3G46440	10	1	Niben261Chr08g1237022	9	Niben261Chr07g1178010/Niben261Chr18g0008017/Niben261Chr18g1375009/Niben261Chr13g0010010/Niben261Chr12g0827008/Niben261Chr06g1410008/Niben261Chr15g1422003/Niben261Chr15g1259003/Niben261Chr02g0162004
ath00999	Biosynthesis of various plant secondary metabolites	5/204	88/9640	0.0385555	0.192777	Niben261Chr06g1154012/Niben261Chr12g0609008/Niben261Chr17g1072027/Niben261Chr16g1297006/Niben261Chr17g0005017	Niben261Chr06g1154012/Niben261Chr12g0609008/Niben261Chr17g1072027/Niben261Chr16g1297006/Niben261Chr17g0005017	ath:AT3G18080/ath:AT1G61810/ath:AT1G02850/ath:AT4G31940/ath:AT1G55290	5	0		5	Niben261Chr06g1154012/Niben261Chr12g0609008/Niben261Chr17g1072027/Niben261Chr16g1297006/Niben261Chr17g0005017
ath00770	Pantothenate and CoA biosynthesis	4/204	66/9640	0.0508073	0.240666	Niben261Chr19g0476003/Niben261Chr13g0994005/Niben261Chr19g0475001/Niben261Chr18g0495001	Niben261Chr19g0476003/Niben261Chr13g0994005/Niben261Chr19g0475001/Niben261Chr18g0495001	ath:AT1G10070/ath:AT3G48560/ath:AT1G10070/ath:AT1G10070	4	0		4	Niben261Chr19g0476003/Niben261Chr13g0994005/Niben261Chr19g0475001/Niben261Chr18g0495001
ath04146	Peroxisome	7/204	178/9640	0.0837115	0.345033	Niben261Chr19g0661007/Niben261Chr18g1248003/Niben261Chr04g0411009/Niben261Chr18g1294009/Niben261Chr09g0834015/Niben261Chr09g1098001/Niben261Chr07g0077009	Niben261Chr19g0661007/Niben261Chr18g1248003/Niben261Chr04g0411009/Niben261Chr18g1294009/Niben261Chr09g0834015/Niben261Chr09g1098001/Niben261Chr07g0077009	ath:AT4G35090/ath:AT3G11980/ath:AT3G14420/ath:AT2G14860/ath:AT4G33790/ath:AT4G23850/ath:AT5G65110	7	0		7	Niben261Chr19g0661007/Niben261Chr18g1248003/Niben261Chr04g0411009/Niben261Chr18g1294009/Niben261Chr09g0834015/Niben261Chr09g1098001/Niben261Chr07g0077009
ath00250	Alanine, aspartate and glutamate metabolism	5/204	110/9640	0.0837431	0.345033	Niben261Chr18g0684004/Niben261Chr08g0323012/Niben261Chr10g1091006/Niben261Chr05g0879001/Niben261Chr05g0879002	Niben261Chr18g0684004/Niben261Chr08g0323012/Niben261Chr10g1091006/Niben261Chr05g0879001/Niben261Chr05g0879002	ath:AT2G02010/ath:AT5G17330/ath:AT3G47340/ath:AT2G30970/ath:AT2G30970	5	0		5	Niben261Chr18g0684004/Niben261Chr08g0323012/Niben261Chr10g1091006/Niben261Chr05g0879001/Niben261Chr05g0879002
ath00660	C5-Branched dibasic acid metabolism	2/204	23/9640	0.0843415	0.345033	Niben261Chr13g0994005/novel.1971	Niben261Chr13g0994005/-	ath:AT3G48560/ath:AT2G43090	2	1	novel.1971	1	Niben261Chr13g0994005
ath00380	Tryptophan metabolism	5/204	112/9640	0.0888308	0.347599	Niben261Chr19g0944003/Niben261Chr19g0661007/Niben261Chr02g0778001/Niben261Chr07g1183012/Niben261Chr01g0531006	Niben261Chr19g0944003/Niben261Chr19g0661007/Niben261Chr02g0778001/Niben261Chr07g1183012/Niben261Chr01g0531006	ath:AT1G24100/ath:AT4G35090/ath:AT1G24100/ath:AT1G14130/ath:AT4G35160	5	0		5	Niben261Chr19g0944003/Niben261Chr19g0661007/Niben261Chr02g0778001/Niben261Chr07g1183012/Niben261Chr01g0531006
ath00460	Cyanoamino acid metabolism	4/204	86/9640	0.108986	0.408696	Niben261Chr14g0090022/Niben261Chr06g1154012/Niben261Chr12g0609008/Niben261Chr17g1072027	Niben261Chr14g0090022/Niben261Chr06g1154012/Niben261Chr12g0609008/Niben261Chr17g1072027	ath:AT4G29210/ath:AT3G18080/ath:AT1G61810/ath:AT1G02850	4	0		4	Niben261Chr14g0090022/Niben261Chr06g1154012/Niben261Chr12g0609008/Niben261Chr17g1072027
ath00565	Ether lipid metabolism	3/204	56/9640	0.114875	0.413552	Niben261Chr14g1378001/Niben261Chr03g0564002/Niben261Chr04g1303003	Niben261Chr14g1378001/Niben261Chr03g0564002/Niben261Chr04g1303003	ath:AT2G42010/ath:AT3G03530/ath:AT2G42010	3	1	Niben261Chr04g1303003	2	Niben261Chr14g1378001/Niben261Chr03g0564002
ath00941	Flavonoid biosynthesis	3/204	64/9640	0.153399	0.530996	Niben261Chr08g0024015/Niben261Chr06g0497004/Niben261Chr17g1326001	Niben261Chr08g0024015/Niben261Chr06g0497004/Niben261Chr17g1326001	ath:AT5G07990/ath:AT5G07990/ath:AT2G40890	3	0		3	Niben261Chr08g0024015/Niben261Chr06g0497004/Niben261Chr17g1326001
ath00904	Diterpenoid biosynthesis	2/204	35/9640	0.168871	0.562904	Niben261Chr12g0649004/Niben261Chr07g1231009	Niben261Chr12g0649004/Niben261Chr07g1231009	ath:AT1G78440/ath:AT1G30040	2	0		2	Niben261Chr12g0649004/Niben261Chr07g1231009
ath00950	Isoquinoline alkaloid biosynthesis	2/204	39/9640	0.199492	0.641225	Niben261Chr05g0879001/Niben261Chr05g0879002	Niben261Chr05g0879001/Niben261Chr05g0879002	ath:AT2G30970/ath:AT2G30970	2	0		2	Niben261Chr05g0879001/Niben261Chr05g0879002
ath00280	Valine, leucine and isoleucine degradation	4/204	112/9640	0.212844	0.645129	Niben261Chr06g0401014/Niben261Chr19g0476003/Niben261Chr19g0475001/Niben261Chr18g0495001	Niben261Chr06g0401014/Niben261Chr19g0476003/Niben261Chr19g0475001/Niben261Chr18g0495001	ath:AT4G11820/ath:AT1G10070/ath:AT1G10070/ath:AT1G10070	4	0		4	Niben261Chr06g0401014/Niben261Chr19g0476003/Niben261Chr19g0475001/Niben261Chr18g0495001
ath00073	Cutin, suberine and wax biosynthesis	2/204	41/9640	0.215043	0.645129	Niben261Chr18g1248003/Niben261Chr09g0834015	Niben261Chr18g1248003/Niben261Chr09g0834015	ath:AT3G11980/ath:AT4G33790	2	0		2	Niben261Chr18g1248003/Niben261Chr09g0834015
ath00564	Glycerophospholipid metabolism	6/204	199/9640	0.245888	0.713869	Niben261Chr14g1378001/Niben261Chr15g0971009/Niben261Chr03g0564002/Niben261Chr04g1303003/Niben261Chr17g0224004/Niben261Chr01g1065004	Niben261Chr14g1378001/Niben261Chr15g0971009/Niben261Chr03g0564002/Niben261Chr04g1303003/Niben261Chr17g0224004/Niben261Chr01g1065004	ath:AT2G42010/ath:AT4G38570/ath:AT3G03530/ath:AT2G42010/ath:AT3G15650/ath:AT1G43710	6	1	Niben261Chr04g1303003	5	Niben261Chr14g1378001/Niben261Chr15g0971009/Niben261Chr03g0564002/Niben261Chr17g0224004/Niben261Chr01g1065004
ath00710	Carbon fixation in photosynthetic organisms	5/204	167/9640	0.279213	0.714069	Niben261Chr19g0662011/Niben261Chr16g0098010/Niben261Chr03g0853016/Niben261Chr05g0879001/Niben261Chr05g0879002	Niben261Chr19g0662011/Niben261Chr16g0098010/Niben261Chr03g0853016/Niben261Chr05g0879001/Niben261Chr05g0879002	ath:AT1G42970/ath:AT5G38410/ath:AT1G79530/ath:AT2G30970/ath:AT2G30970	5	3	Niben261Chr19g0662011/Niben261Chr16g0098010/Niben261Chr03g0853016	2	Niben261Chr05g0879001/Niben261Chr05g0879002
ath00410	beta-Alanine metabolism	3/204	87/9640	0.279708	0.714069	Niben261Chr18g0684004/Niben261Chr08g0323012/Niben261Chr07g0077009	Niben261Chr18g0684004/Niben261Chr08g0323012/Niben261Chr07g0077009	ath:AT2G02010/ath:AT5G17330/ath:AT5G65110	3	0		3	Niben261Chr18g0684004/Niben261Chr08g0323012/Niben261Chr07g0077009
ath00790	Folate biosynthesis	2/204	50/9640	0.285851	0.714069	Niben261Chr18g0571006/Niben261Chr18g0571013	Niben261Chr18g0571006/Niben261Chr18g0571013	ath:AT1G16540/ath:AT1G16540	2	0		2	Niben261Chr18g0571006/Niben261Chr18g0571013
ath00902	Monoterpenoid biosynthesis	1/204	16/9640	0.290002	0.714069	Niben261Chr03g0403008	Niben261Chr03g0403008	ath:AT3G61220	1	1	Niben261Chr03g0403008	0
ath02010	ABC transporters	4/204	130/9640	0.296172	0.714069	Niben261Chr03g1350005/Niben261Chr05g0371003/Niben261Chr19g1250015/Niben261Chr11g1084001	Niben261Chr03g1350005/Niben261Chr05g0371003/Niben261Chr19g1250015/Niben261Chr11g1084001	ath:AT1G66950/ath:AT5G06530/ath:AT1G15520/ath:AT1G71960	4	2	Niben261Chr03g1350005/Niben261Chr05g0371003	2	Niben261Chr19g1250015/Niben261Chr11g1084001
ath00052	Galactose metabolism	3/204	91/9640	0.302877	0.714069	Niben261Chr01g1638006/Niben261Chr03g1555004/Niben261Chr13g0231009	Niben261Chr01g1638006/Niben261Chr03g1555004/Niben261Chr13g0231009	ath:AT3G52600/ath:AT4G26270/ath:AT3G52600	3	1	Niben261Chr13g0231009	2	Niben261Chr01g1638006/Niben261Chr03g1555004
ath00061	Fatty acid biosynthesis	3/204	92/9640	0.308686	0.714069	Niben261Chr09g1098001/Niben261Chr04g0097017/Niben261Chr17g1320001	Niben261Chr09g1098001/Niben261Chr04g0097017/Niben261Chr17g1320001	ath:AT4G23850/ath:AT3G25110/ath:AT3G25110	3	2	Niben261Chr04g0097017/Niben261Chr17g1320001	1	Niben261Chr09g1098001
ath00960	Tropane, piperidine and pyridine alkaloid biosynthesis	2/204	53/9640	0.30943	0.714069	Niben261Chr05g0879001/Niben261Chr05g0879002	Niben261Chr05g0879001/Niben261Chr05g0879002	ath:AT2G30970/ath:AT2G30970	2	0		2	Niben261Chr05g0879001/Niben261Chr05g0879002
ath00905	Brassinosteroid biosynthesis	1/204	19/9640	0.334205	0.746406	Niben261Chr16g0397001	Niben261Chr16g0397001	ath:AT5G14400	1	1	Niben261Chr16g0397001	0
ath00590	Arachidonic acid metabolism	1/204	20/9640	0.348323	0.746406	Niben261Chr14g0090022	Niben261Chr14g0090022	ath:AT4G29210	1	0		1	Niben261Chr14g0090022
ath00750	Vitamin B6 metabolism	1/204	20/9640	0.348323	0.746406	Niben261Chr08g0046003	Niben261Chr08g0046003	ath:AT1G17710	1	0		1	Niben261Chr08g0046003
ath00300	Lysine biosynthesis	1/204	23/9640	0.388912	0.814002	Niben261Chr01g1565004	Niben261Chr01g1565004	ath:AT2G13810	1	0		1	Niben261Chr01g1565004
ath04075	Plant hormone signal transduction	11/204	466/9640	0.398905	0.814591	Niben261Chr13g0055007/Niben261Chr13g0060013/novel.2058/Niben261Chr14g0368003/Niben261Chr10g1175005/Niben261Chr01g0800003/Niben261Chr15g0466010/Niben261Scf02183g0000003/Niben261Chr16g0548017/Niben261Chr03g0253011/novel.3311	Niben261Chr13g0055007/Niben261Chr13g0060013/-/Niben261Chr14g0368003/Niben261Chr10g1175005/Niben261Chr01g0800003/Niben261Chr15g0466010/Niben261Scf02183g0000003/Niben261Chr16g0548017/Niben261Chr03g0253011/-	ath:AT2G14580/ath:AT1G50060/ath:AT2G14580/ath:AT3G11410/ath:AT3G11410/ath:AT3G11410/ath:AT5G65210/ath:AT3G15540/ath:AT1G01360/ath:AT2G14960/ath:AT3G63010	11	1	Niben261Scf02183g0000003	10	Niben261Chr13g0055007/Niben261Chr13g0060013/novel.2058/Niben261Chr14g0368003/Niben261Chr10g1175005/Niben261Chr01g0800003/Niben261Chr15g0466010/Niben261Chr16g0548017/Niben261Chr03g0253011/novel.3311
ath00220	Arginine biosynthesis	2/204	68/9640	0.423667	0.814591	Niben261Chr05g0879001/Niben261Chr05g0879002	Niben261Chr05g0879001/Niben261Chr05g0879002	ath:AT2G30970/ath:AT2G30970	2	0		2	Niben261Chr05g0879001/Niben261Chr05g0879002
ath00350	Tyrosine metabolism	2/204	69/9640	0.430963	0.814591	Niben261Chr05g0879001/Niben261Chr05g0879002	Niben261Chr05g0879001/Niben261Chr05g0879002	ath:AT2G30970/ath:AT2G30970	2	0		2	Niben261Chr05g0879001/Niben261Chr05g0879002
ath00909	Sesquiterpenoid and triterpenoid biosynthesis	1/204	27/9640	0.439144	0.814591	Niben261Chr10g0513003	Niben261Chr10g0513003	ath:AT5G23960	1	0		1	Niben261Chr10g0513003
ath01230	Biosynthesis of amino acids	11/204	484/9640	0.44827	0.814591	Niben261Chr01g1565004/Niben261Chr19g0476003/Niben261Chr13g0994005/Niben261Chr19g0475001/Niben261Chr03g1555004/Niben261Chr10g1091006/Niben261Chr03g0853016/Niben261Chr05g0879001/Niben261Chr18g0495001/Niben261Chr05g0879002/novel.1971	Niben261Chr01g1565004/Niben261Chr19g0476003/Niben261Chr13g0994005/Niben261Chr19g0475001/Niben261Chr03g1555004/Niben261Chr10g1091006/Niben261Chr03g0853016/Niben261Chr05g0879001/Niben261Chr18g0495001/Niben261Chr05g0879002/-	ath:AT2G13810/ath:AT1G10070/ath:AT3G48560/ath:AT1G10070/ath:AT4G26270/ath:AT3G47340/ath:AT1G79530/ath:AT2G30970/ath:AT1G10070/ath:AT2G30970/ath:AT2G43090	11	2	Niben261Chr03g0853016/novel.1971	9	Niben261Chr01g1565004/Niben261Chr19g0476003/Niben261Chr13g0994005/Niben261Chr19g0475001/Niben261Chr03g1555004/Niben261Chr10g1091006/Niben261Chr05g0879001/Niben261Chr18g0495001/Niben261Chr05g0879002
ath00591	Linoleic acid metabolism	1/204	28/9640	0.451046	0.814591	Niben261Chr09g0995011	Niben261Chr09g0995011	ath:AT1G55020	1	0		1	Niben261Chr09g0995011
ath00360	Phenylalanine metabolism	2/204	72/9640	0.45255	0.814591	Niben261Chr05g0879001/Niben261Chr05g0879002	Niben261Chr05g0879001/Niben261Chr05g0879002	ath:AT2G30970/ath:AT2G30970	2	0		2	Niben261Chr05g0879001/Niben261Chr05g0879002
ath00945	Stilbenoid, diarylheptanoid and gingerol biosynthesis	1/204	31/9640	0.485265	0.856349	Niben261Chr17g1326001	Niben261Chr17g1326001	ath:AT2G40890	1	0		1	Niben261Chr17g1326001
ath00630	Glyoxylate and dicarboxylate metabolism	4/204	174/9640	0.50492	0.868299	Niben261Chr16g0098010/Niben261Chr19g0661007/Niben261Chr04g0411009/Niben261Chr07g1483003	Niben261Chr16g0098010/Niben261Chr19g0661007/Niben261Chr04g0411009/Niben261Chr07g1483003	ath:AT5G38410/ath:AT4G35090/ath:AT3G14420/ath:AT5G14780	4	1	Niben261Chr16g0098010	3	Niben261Chr19g0661007/Niben261Chr04g0411009/Niben261Chr07g1483003
ath00071	Fatty acid degradation	2/204	82/9640	0.520979	0.868299	Niben261Chr09g1098001/Niben261Chr07g0077009	Niben261Chr09g1098001/Niben261Chr07g0077009	ath:AT4G23850/ath:AT5G65110	2	0		2	Niben261Chr09g1098001/Niben261Chr07g0077009
ath03022	Basal transcription factors	2/204	82/9640	0.520979	0.868299	Niben261Chr09g0990005/Niben261Chr13g0060003	Niben261Chr09g0990005/Niben261Chr13g0060003	ath:AT5G27620/ath:AT5G41370	2	0		2	Niben261Chr09g0990005/Niben261Chr13g0060003
ath01040	Biosynthesis of unsaturated fatty acids	1/204	38/9640	0.557078	0.880954	Niben261Chr07g0077009	Niben261Chr07g0077009	ath:AT5G65110	1	0		1	Niben261Chr07g0077009
ath00780	Biotin metabolism	1/204	40/9640	0.575699	0.880954	Niben261Chr14g0328001	Niben261Chr14g0328001	ath:AT5G04620	1	1	Niben261Chr14g0328001	0
ath00561	Glycerolipid metabolism	3/204	141/9640	0.577161	0.880954	Niben261Chr17g0037011/Niben261Chr16g1360009/novel.6267	Niben261Chr17g0037011/Niben261Chr16g1360009/-	ath:AT1G48300/ath:AT1G48300/ath:AT1G11090	3	2	Niben261Chr17g0037011/Niben261Chr16g1360009	1	novel.6267
ath00562	Inositol phosphate metabolism	3/204	141/9640	0.577161	0.880954	Niben261Chr15g0971009/Niben261Chr17g1120002/Niben261Chr03g0564002	Niben261Chr15g0971009/Niben261Chr17g1120002/Niben261Chr03g0564002	ath:AT4G38570/ath:AT1G34260/ath:AT3G03530	3	0		3	Niben261Chr15g0971009/Niben261Chr17g1120002/Niben261Chr03g0564002
ath00640	Propanoate metabolism	2/204	91/9640	0.577514	0.880954	Niben261Chr14g0954001/Niben261Chr07g0077009	Niben261Chr14g0954001/Niben261Chr07g0077009	ath:AT4G17260/ath:AT5G65110	2	0		2	Niben261Chr14g0954001/Niben261Chr07g0077009
ath00062	Fatty acid elongation	1/204	44/9640	0.610636	0.911842	Niben261Chr09g0105009	Niben261Chr09g0105009	ath:AT5G43760	1	0		1	Niben261Chr09g0105009
ath00400	Phenylalanine, tyrosine and tryptophan biosynthesis	2/204	98/9640	0.618026	0.911842	Niben261Chr05g0879001/Niben261Chr05g0879002	Niben261Chr05g0879001/Niben261Chr05g0879002	ath:AT2G30970/ath:AT2G30970	2	0		2	Niben261Chr05g0879001/Niben261Chr05g0879002
ath00190	Oxidative phosphorylation	6/204	305/9640	0.630001	0.914015	Niben261Chr07g1347013/Niben261Chr16g0308003/Niben261Chr03g0002006/Niben261Chr16g1155004/Niben261Chr07g0438001/Niben261Chr17g0375008	Niben261Chr07g1347013/Niben261Chr16g0308003/Niben261Chr03g0002006/Niben261Chr16g1155004/Niben261Chr07g0438001/Niben261Chr17g0375008	ath:AT1G07180/ath:AT2G29990/ath:AT1G01050/ath:AT2G29990/ath:AT3G52300/ath:AT4G02620	6	0		6	Niben261Chr07g1347013/Niben261Chr16g0308003/Niben261Chr03g0002006/Niben261Chr16g1155004/Niben261Chr07g0438001/Niben261Chr17g0375008
ath00330	Arginine and proline metabolism	2/204	102/9640	0.639811	0.914015	Niben261Chr05g0879001/Niben261Chr05g0879002	Niben261Chr05g0879001/Niben261Chr05g0879002	ath:AT2G30970/ath:AT2G30970	2	0		2	Niben261Chr05g0879001/Niben261Chr05g0879002
ath00900	Terpenoid backbone biosynthesis	2/204	106/9640	0.660611	0.928985	Niben261Chr06g0401014/Niben261Chr07g0828009	Niben261Chr06g0401014/Niben261Chr07g0828009	ath:AT4G11820/ath:AT1G76490	2	0		2	Niben261Chr06g0401014/Niben261Chr07g0828009
ath03060	Protein export	2/204	111/9640	0.685251	0.944509	Niben261Chr13g1364019/Niben261Chr10g1339009	Niben261Chr13g1364019/Niben261Chr10g1339009	ath:AT1G48900/ath:AT5G42020	2	0		2	Niben261Chr13g1364019/Niben261Chr10g1339009
ath00910	Nitrogen metabolism	1/204	55/9640	0.69264	0.944509	Niben261Chr02g1094002	Niben261Chr02g1094002	ath:AT1G08080	1	0		1	Niben261Chr02g1094002
ath00920	Sulfur metabolism	1/204	69/9640	0.772618	0.992469	Niben261Chr08g1058006	Niben261Chr08g1058006	ath:AT1G53580	1	0		1	Niben261Chr08g1058006
ath04070	Phosphatidylinositol signaling system	2/204	132/9640	0.773156	0.992469	Niben261Chr15g0971009/Niben261Chr17g1120002	Niben261Chr15g0971009/Niben261Chr17g1120002	ath:AT4G38570/ath:AT1G34260	2	0		2	Niben261Chr15g0971009/Niben261Chr17g1120002
ath01212	Fatty acid metabolism	2/204	142/9640	0.806968	0.992469	Niben261Chr09g1098001/Niben261Chr07g0077009	Niben261Chr09g1098001/Niben261Chr07g0077009	ath:AT4G23850/ath:AT5G65110	2	0		2	Niben261Chr09g1098001/Niben261Chr07g0077009
ath00130	Ubiquinone and other terpenoid-quinone biosynthesis	1/204	84/9640	0.835449	0.992469	Niben261Scf03248g0000008	Niben261Scf03248g0000008	ath:AT4G36750	1	0		1	Niben261Scf03248g0000008
ath03420	Nucleotide excision repair	2/204	155/9640	0.84421	0.992469	Niben261Chr09g0990005/Niben261Chr13g0060003	Niben261Chr09g0990005/Niben261Chr13g0060003	ath:AT5G27620/ath:AT5G41370	2	0		2	Niben261Chr09g0990005/Niben261Chr13g0060003
ath03018	RNA degradation	3/204	219/9640	0.847033	0.992469	Niben261Chr13g0757003/Niben261Chr03g1555004/Niben261Chr08g1177001	Niben261Chr13g0757003/Niben261Chr03g1555004/Niben261Chr08g1177001	ath:AT5G22250/ath:AT4G26270/ath:AT5G22250	3	2	Niben261Chr13g0757003/Niben261Chr08g1177001	1	Niben261Chr03g1555004
ath04141	Protein processing in endoplasmic reticulum	7/204	456/9640	0.8553	0.992469	Niben261Chr12g0338005/Niben261Chr11g1361010/Niben261Chr18g0858015/Niben261Chr01g0059002/Niben261Chr11g0095006/Niben261Chr10g1339009/Niben261Chr14g0950012	Niben261Chr12g0338005/Niben261Chr11g1361010/Niben261Chr18g0858015/Niben261Chr01g0059002/Niben261Chr11g0095006/Niben261Chr10g1339009/Niben261Chr14g0950012	ath:AT1G07400/ath:AT3G12580/ath:AT5G22060/ath:AT4G03510/ath:AT4G03510/ath:AT5G42020/ath:AT5G51440	7	0		7	Niben261Chr12g0338005/Niben261Chr11g1361010/Niben261Chr18g0858015/Niben261Chr01g0059002/Niben261Chr11g0095006/Niben261Chr10g1339009/Niben261Chr14g0950012
ath03030	DNA replication	1/204	90/9640	0.855438	0.992469	Niben261Chr03g0012007	Niben261Chr03g0012007	ath:AT5G41880	1	0		1	Niben261Chr03g0012007
ath04145	Phagosome	2/204	182/9640	0.901572	0.992469	Niben261Chr17g1120002/Niben261Chr17g0375008	Niben261Chr17g1120002/Niben261Chr17g0375008	ath:AT1G34260/ath:AT4G02620	2	0		2	Niben261Chr17g1120002/Niben261Chr17g0375008
ath00030	Pentose phosphate pathway	1/204	108/9640	0.902027	0.992469	Niben261Chr03g1555004	Niben261Chr03g1555004	ath:AT4G26270	1	0		1	Niben261Chr03g1555004
ath03013	Nucleocytoplasmic transport	3/204	252/9640	0.906121	0.992469	novel.7163/Niben261Chr15g0519004/Niben261Chr03g0901016	-/Niben261Chr15g0519004/Niben261Chr03g0901016	ath:AT4G38760/ath:AT5G19820/ath:AT1G10390	3	0		3	novel.7163/Niben261Chr15g0519004/Niben261Chr03g0901016
ath03020	RNA polymerase	1/204	112/9640	0.91015	0.992469	novel.1554	-	ath:AT1G29940	1	1	novel.1554	0
ath00010	Glycolysis / Gluconeogenesis	3/204	255/9640	0.910316	0.992469	Niben261Chr03g1555004/Niben261Chr14g0954001/Niben261Chr03g0853016	Niben261Chr03g1555004/Niben261Chr14g0954001/Niben261Chr03g0853016	ath:AT4G26270/ath:AT4G17260/ath:AT1G79530	3	1	Niben261Chr03g0853016	2	Niben261Chr03g1555004/Niben261Chr14g0954001
ath00051	Fructose and mannose metabolism	1/204	114/9640	0.913956	0.992469	Niben261Chr03g1555004	Niben261Chr03g1555004	ath:AT4G26270	1	0		1	Niben261Chr03g1555004
ath01250	Biosynthesis of nucleotide sugars	2/204	196/9640	0.922922	0.992469	Niben261Chr12g0827008/Niben261Chr02g0162004	Niben261Chr12g0827008/Niben261Chr02g0162004	ath:AT1G30620/ath:AT3G46440	2	0		2	Niben261Chr12g0827008/Niben261Chr02g0162004
ath04120	Ubiquitin mediated proteolysis	3/204	270/9640	0.928856	0.992469	novel.5302/Niben261Chr13g1297001/Niben261Chr05g0601003	-/Niben261Chr13g1297001/Niben261Chr05g0601003	ath:AT5G20620/ath:AT3G15355/ath:AT2G32950	3	0		3	novel.5302/Niben261Chr13g1297001/Niben261Chr05g0601003
ath04144	Endocytosis	4/204	343/9640	0.936135	0.992469	Niben261Chr14g1378001/Niben261Chr11g1361010/Niben261Chr15g0982012/Niben261Chr04g1303003	Niben261Chr14g1378001/Niben261Chr11g1361010/Niben261Chr15g0982012/Niben261Chr04g1303003	ath:AT2G42010/ath:AT3G12580/ath:AT5G44560/ath:AT2G42010	4	2	Niben261Chr15g0982012/Niben261Chr04g1303003	2	Niben261Chr14g1378001/Niben261Chr11g1361010
ath01240	Biosynthesis of cofactors	6/204	469/9640	0.936721	0.992469	Niben261Chr08g0046003/Niben261Chr19g0476003/Niben261Chr19g0475001/Niben261Chr18g0495001/Niben261Scf03248g0000008/Niben261Chr14g0328001	Niben261Chr08g0046003/Niben261Chr19g0476003/Niben261Chr19g0475001/Niben261Chr18g0495001/Niben261Scf03248g0000008/Niben261Chr14g0328001	ath:AT1G17710/ath:AT1G10070/ath:AT1G10070/ath:AT1G10070/ath:AT4G36750/ath:AT5G04620	6	1	Niben261Chr14g0328001	5	Niben261Chr08g0046003/Niben261Chr19g0476003/Niben261Chr19g0475001/Niben261Chr18g0495001/Niben261Scf03248g0000008
ath03050	Proteasome	1/204	148/9640	0.958837	0.992469	Niben261Chr11g1171006	Niben261Chr11g1171006	ath:AT3G27430	1	1	Niben261Chr11g1171006	0
ath00230	Purine metabolism	1/204	174/9640	0.976619	0.992469	Niben261Chr09g0688005	Niben261Chr09g0688005	ath:AT3G21110	1	0		1	Niben261Chr09g0688005
ath03015	mRNA surveillance pathway	2/204	271/9640	0.980349	0.992469	Niben261Chr19g0052005/Niben261Chr12g0679012	Niben261Chr19g0052005/Niben261Chr12g0679012	ath:AT4G29820/ath:AT4G29820	2	0		2	Niben261Chr19g0052005/Niben261Chr12g0679012
ath00620	Pyruvate metabolism	1/204	206/9640	0.98837	0.992469	Niben261Chr14g0954001	Niben261Chr14g0954001	ath:AT4G17260	1	0		1	Niben261Chr14g0954001
ath04814	Motor proteins	1/204	216/9640	0.990655	0.992469	Niben261Chr02g0044001	Niben261Chr02g0044001	ath:AT3G58160	1	1	Niben261Chr02g0044001	0
ath03040	Spliceosome	3/204	404/9640	0.992469	0.992469	Niben261Chr11g1361010/Niben261Chr13g1231008/Niben261Chr06g1160014	Niben261Chr11g1361010/Niben261Chr13g1231008/Niben261Chr06g1160014	ath:AT3G12580/ath:AT1G32490/ath:AT1G20960	3	0		3	Niben261Chr11g1361010/Niben261Chr13g1231008/Niben261Chr06g1160014
