# Supplementary material for: Regulation of Disease-Resistance Genes against CWMV Infection by NbHAG1-Mediated H3K36ac
Source: Int J Mol Sci. 2024 Feb 28;25(5):2800. doi: 10.3390/ijms25052800 (PMC10931728; doi:10.3390/ijms25052800)
Supplement: Supplementary file 1 [file ijms-25-02800-s001.zip › ijms-2871725-supplementary/Table S7. Disease resistance genes significantly up-regulated in OENbHAG1.xls]

## Sheet: Sheet1
Table S7. Disease resistance genes significantly up-regulated in OENbHAG1.
gene_id	FoldChange	log2FoldChange	pvalue	gene_chr	gene_strand	gene_length	gene_biotype		gene_description	tf_family
novel.3369	497.26	8.95786	1.24499e-13	Niben261Chr09	-	1616	-		ERF109 RecName: Full=Ethylene-responsive transcription factor ERF109 && PF00847:AP2 domain	AP2
Niben261Chr04g0922010	185.246	7.5333	6.2893e-10	Niben261Chr04	-	738	protein_coding		DnaJ1_AQUAE I17 OS=Aquifex aeolicus (strain VF5) OX=224324 GN=dnaJ1 PE=3 SV=1 && PF13370:4Fe-4S single cluster domain of Ferredoxin I|PF00226:DnaJ domain	DnaJ
Niben261Chr12g0679014	21.7281	4.44149	0.00256978	Niben261Chr12	+	567	protein_coding		M2K2_ARATH Mitogen-activated protein kinase kinase 2 OS=Arabidopsis thaliana OX=3702 GN=MKK2 PE=1 SV=2 && PF00069:Protein kinase domain	Pkinase
Niben261Chr06g0182025	13.2593	3.72894	0.0042017	Niben261Chr06	+	1014	protein_coding		RPM1_ARATH Disease resistance protein RPM1 OS=Arabidopsis thaliana OX=3702 GN=RPM1 PE=1 SV=1 && PF18052:Rx N-terminal domain	-
Niben261Chr05g0614006	4.41063	2.14098	0.000559786	Niben261Chr05	+	726	protein_coding		ZHD1_ORYSI Zinc-finger homeodomain protein 1 OS=Oryza sativa subsp. indica OX=39946 GN=ZHD1 PE=3 SV=1 && PF04770:ZF-HD protein dimerisation region	ZF-HD_dimer
Niben261Chr13g0757003	3.4941	1.80492	5.90978e-12	Niben261Chr13	+	1461	protein_coding		CAF1K_ARATH Probable CCR4-associated factor 1 homolog 11 OS=Arabidopsis thaliana OX=3702 GN=CAF1-11 PE=2 SV=1 && PF04857:CAF1 family ribonuclease	CAF1
Niben261Chr12g0528019	3.46941	1.79469	1.29345e-05	Niben261Chr12	+	2004	protein_coding		CALS8_ARATH Putative callose synthase 8 OS=Arabidopsis thaliana OX=3702 GN=CALS8 PE=3 SV=2 && PF02364:1,3-beta-glucan synthase component	-
Niben261Chr02g0419002	3.35211	1.74507	0.000481201	Niben261Chr02	+	1113	protein_coding		MTP4_ORYSJ Metal tolerance protein 4 OS=Oryza sativa subsp. japonica OX=39947 GN=MTP4 PE=2 SV=1 && PF01545:Cation efflux family	-
Niben261Chr03g1073005	3.23402	1.69333	2.0041e-13	Niben261Chr03	-	690	protein_coding		CML37_ARATH Calcium-binding protein CML37 OS=Arabidopsis thaliana OX=3702 GN=CML37 PE=1 SV=1 && PF13833:EF-hand domain pair	-
Niben261Chr06g0766020	3.21072	1.6829	1.15738e-68	Niben261Chr06	+	1863	protein_coding		PAP14_ARATH Probable plastid-lipid-associated protein 14, chloroplastic OS=Arabidopsis thaliana OX=3702 GN=PAP14 PE=1 SV=1	-
Niben261Chr08g1177001	3.0308	1.5997	2.10225e-06	Niben261Chr08	-	1101	protein_coding		CAF1K_ARATH Probable CCR4-associated factor 1 homolog 11 OS=Arabidopsis thaliana OX=3702 GN=CAF1-11 PE=2 SV=1 && PF04857:CAF1 family ribonuclease	CAF1
Niben261Chr03g0984003	3.02409	1.5965	0.00167518	Niben261Chr03	-	2952	protein_coding		AGO7_ARATH Protein argonaute 7 OS=Arabidopsis thaliana OX=3702 GN=AGO7 PE=2 SV=1 && PF08699:Argonaute linker 1 domain|PF16486:N-terminal domain of argonaute|PF02170:PAZ domain|PF02171:Piwi domain	Piwi
Niben261Chr18g1122002	3.01989	1.59449	0.00431022	Niben261Chr18	-	807	protein_coding		RH5_ORYSJ DEAD-box ATP-dependent RNA helicase 5 OS=Oryza sativa subsp. japonica OX=39947 GN=Os07g0301200 PE=2 SV=1 && PF00270:DEAD/DEAH box helicase|PF00271:Helicase conserved C-terminal domain	Helicase_C
Niben261Chr03g1062002	2.98883	1.57958	2.96244e-05	Niben261Chr03	-	411	protein_coding		ADF7_ARATH Actin-depolymerizing factor 7 OS=Arabidopsis thaliana OX=3702 GN=ADF7 PE=2 SV=1 && PF00241:Cofilin/tropomyosin-type actin-binding protein	Cofilin_ADF
Niben261Chr10g0057006	2.93981	1.55572	0.000783073	Niben261Chr10	+	3822	protein_coding		MSP1_ORYSJ Leucine-rich repeat receptor protein kinase MSP1 OS=Oryza sativa subsp. japonica OX=39947 GN=MSP1 PE=1 SV=1 && PF00069:Protein kinase domain|PF08263:Leucine rich repeat N-terminal domain|PF13855:Leucine rich repeat	Pkinase
Niben261Chr11g1415011	2.89448	1.5333	5.93639e-05	Niben261Chr11	-	3984	protein_coding		RGA2_SOLBU Disease resistance protein RGA2 OS=Solanum bulbocastanum OX=147425 GN=RGA2 PE=1 SV=1 && PF00931:NB-ARC domain	NB-ARC
Niben261Chr05g1111006	2.85637	1.51418	0.00112357	Niben261Chr05	-	975	protein_coding		ZWIP2_ARATH Zinc finger protein WIP2 OS=Arabidopsis thaliana OX=3702 GN=WIP2 PE=1 SV=1	-
Niben261Chr13g0294001	2.8287	1.50014	0.0055635	Niben261Chr13	+	1119	protein_coding		HFA6B_ARATH Heat stress transcription factor A-6b OS=Arabidopsis thaliana OX=3702 GN=HSFA6b PE=2 SV=1 && PF00447:HSF-type DNA-binding	HSF_DNA-bind
Niben261Chr05g0078007	2.71224	1.43948	8.40688e-06	Niben261Chr05	+	867	protein_coding		ARP1_ARATH Probable RNA-binding protein ARP1 OS=Arabidopsis thaliana OX=3702 GN=ARP1 PE=2 SV=1 && PF00076:RNA recognition motif. (a.k.a. RRM, RBD, or RNP domain)	RRM_1
Niben261Chr05g1269003	2.69356	1.42951	8.66816e-06	Niben261Chr05	-	1317	protein_coding		TBL35_ARATH Protein trichome birefringence-like 35 OS=Arabidopsis thaliana OX=3702 GN=TBL35 PE=2 SV=1 && PF13839:GDSL/SGNH-like Acyl-Esterase family found in Pmr5 and Cas1p|PF14416:PMR5 N terminal Domain	-
Niben261Chr16g0380011	2.68319	1.42395	0.00435424	Niben261Chr16	+	2142	protein_coding		RAM1_PETHY GRAS family protein RAM1 OS=Petunia hybrida OX=4102 GN=RAM1 PE=2 SV=1 && PF03514:GRAS domain family	GRAS
Niben261Chr08g0033008	2.66898	1.41629	0.00252385	Niben261Chr08	+	321	protein_coding		DIRL1_ARATH Putative lipid-transfer protein DIR1 OS=Arabidopsis thaliana OX=3702 GN=DIR1 PE=1 SV=1 && PF14368:Probable lipid transfer	-
Niben261Chr10g1081011	2.56878	1.36108	0.00020201	Niben261Chr10	-	1212	protein_coding		TCP14_ARATH Transcription factor TCP14 OS=Arabidopsis thaliana OX=3702 GN=TCP14 PE=1 SV=1 && PF03634:TCP family transcription factor	TCP
Niben261Chr13g0828011	2.56774	1.3605	0.00092947	Niben261Chr13	-	1632	protein_coding		C3H62_ORYSJ Zinc finger CCCH domain-containing protein 62 OS=Oryza sativa subsp. japonica OX=39947 GN=Os10g0391300 PE=4 SV=2 && PF18044:CCCH-type zinc finger|PF02037:SAP domain	SAP
Niben261Chr03g0986001	2.48757	1.31474	6.4654e-05	Niben261Chr03	-	1089	protein_coding		MYB16_ARATH Transcription factor MYB16 OS=Arabidopsis thaliana OX=3702 GN=MYB16 PE=2 SV=1 && PF00249:Myb-like DNA-binding domain	Myb_DNA-binding
Niben261Chr01g1260005	2.48084	1.31083	0.00090917	Niben261Chr01	-	819	protein_coding		MYB73_ARATH Transcription factor MYB73 OS=Arabidopsis thaliana OX=3702 GN=MYB73 PE=1 SV=1 && PF13921:Myb-like DNA-binding domain	-
Niben261Chr08g1237022	2.36411	1.2413	1.84664e-09	Niben261Chr08	-	747	protein_coding		CHI5_ORYSJ Chitinase 5 OS=Oryza sativa subsp. japonica OX=39947 GN=Cht5 PE=2 SV=1 && PF00187:Chitin recognition protein|PF00182:Chitinase class I	-
Niben261Chr14g1225007	2.35322	1.23464	5.92082e-12	Niben261Chr14	-	1194	protein_coding		ERF80_ARATH Ethylene-responsive transcription factor 9 OS=Arabidopsis thaliana OX=3702 GN=ERF9 PE=1 SV=1 && PF00847:AP2 domain	AP2
novel.6324	2.35189	1.23382	0.00487701	Niben261Chr17	-	813	-		MLP28 RecName: Full=MLP-like protein 28 && PF00407:Pathogenesis-related protein Bet v 1 family	-
Niben261Chr11g0476003	2.32827	1.21926	0.00433449	Niben261Chr11	-	1323	protein_coding		SCP1_MEDTR Serine carboxypeptidase 1 OS=Medicago truncatula OX=3880 GN=SCP1 PE=1 SV=3 && PF00450:Serine carboxypeptidase	Peptidase_S10
Niben261Chr08g0393006	2.25246	1.1715	1.81742e-07	Niben261Chr08	+	2838	protein_coding		YSL2_ARATH Metal-nicotianamine transporter YSL2 OS=Arabidopsis thaliana OX=3702 GN=YSL2 PE=1 SV=1 && PF03169:OPT oligopeptide transporter protein	OPT
Niben261Chr19g0756008	2.23002	1.15706	2.06185e-06	Niben261Chr19	+	1698	protein_coding		PTR19_ARATH Protein NRT1/ PTR FAMILY 4.6 OS=Arabidopsis thaliana OX=3702 GN=NPF4.6 PE=1 SV=1 && PF00854:POT family	-
Niben261Chr08g1356007	2.21406	1.14669	9.10122e-08	Niben261Chr08	-	750	protein_coding		ATL7_ARATH RING-H2 finger protein ATL7 OS=Arabidopsis thaliana OX=3702 GN=ATL7 PE=2 SV=1 && PF13639:Ring finger domain	-
novel.5702	2.21295	1.14597	0.000116509	Niben261Chr16	+	1287	-		ERF4 RecName: Full=Ethylene-responsive transcription factor 4; Short=AtERF4; AltName: Full=Ethylene-responsive element-binding factor 4; Short=EREBP-4; AltName: Full=Protein RELATED TO APETALA2 5 && PF00847:AP2 domain	AP2
Niben261Chr01g0619016	2.14685	1.10222	0.00145306	Niben261Chr01	+	1428	protein_coding		SPL15_ARATH Squamosa promoter-binding-like protein 15 OS=Arabidopsis thaliana OX=3702 GN=SPL15 PE=1 SV=1 && PF03110:SBP domain	SBP
Niben261Chr11g0565003	2.11382	1.07985	0.00308078	Niben261Chr11	-	855	protein_coding		ZHD6_ARATH Zinc-finger homeodomain protein 6 OS=Arabidopsis thaliana OX=3702 GN=ZHD6 PE=1 SV=1 && PF04770:ZF-HD protein dimerisation region	ZF-HD_dimer
Niben261Chr13g0403010	2.07396	1.05239	0.0054633	Niben261Chr13	+	3990	protein_coding		LIN1_LOTJA Putative E3 ubiquitin-protein ligase LIN-1 OS=Lotus japonicus OX=34305 GN=CERBERUS PE=2 SV=2	-
