# Supplementary material for: Regulation of Disease-Resistance Genes against CWMV Infection by NbHAG1-Mediated H3K36ac
Source: Int J Mol Sci. 2024 Feb 28;25(5):2800. doi: 10.3390/ijms25052800 (PMC10931728; doi:10.3390/ijms25052800)
Supplement: Supplementary file 1 [file ijms-25-02800-s001.zip › ijms-2871725-supplementary/Table S8. Gene-specific primers used in this study.xls]

## Sheet: Sheet1
Table S8. Gene-specific primers used in this study
Name	Primers（5’-3’）
qPCR-Niben101Scf09485g00002.1-F	AGGGCAAATGTGCCTGTCTT
qPCR-Niben101Scf09485g00002.1-R	GTAGGCAACCACTACTGCGA
qPCR-Niben101Scf08519g01017.1-F	TCATGGAGATGATGAGACAGCG
qPCR-Niben101Scf08519g01017.1-R	CGTCCAGTTTCTTTTGCCATCA
qPCR-Niben101Scf09097g01007.1-F	GGCAAATGTGCCTGTCTTCC
qPCR-Niben101Scf09097g01007.1-R	AAGAAACCAGTAGGCGACCA
qPCR-Niben101Scf00377g00001.1-F	GCTTCTCAGTGCCGCTATCT
qPCR-Niben101Scf00377g00001.1-R	GCATCCTCCGCAGATGTTCT
qPCR-Niben101Scf06613g05022.1-F	TTGCAACAGACATGACCAGT
qPCR-Niben101Scf06613g05022.1-R	CCTCGTCTCAGGCATGGAAA
qPCR-Niben101Scf04028g02018.1-F	TAAAGGGCGGGCACACAG
qPCR-Niben101Scf04028g02018.1-R	TCAATTCCAGCGTCAGGCTT
qPCR-Niben101Scf03307g08018.1-F	CTAAAGGGCGGGAACACAGC
qPCR-Niben101Scf03307g08018.1-R	TTAGCAAAACCGACACGACG
qPCR-Niben101Scf25141g00001.1-F	TTGGTGTGGTGGTACTGTGG
qPCR-Niben101Scf25141g00001.1-R	GTGCACCGAAACAGAAAGGG
qPCR-Niben101Scf00962g02008.1-F	GCAGTAGGTGTAGGTCCACG
qPCR-Niben101Scf00962g02008.1-R	CGCAACAGAAAGCAACAAGC
NbUBC-F	TGGAGGTACATTTAAGCTGACAC
NbUBC-R	TCACAGAGCAAAGACTGGATTG
qPCR-NbHAG1-F	AGTGTAACGCCACCTACAGC
qPCR-NbHAG1-R	CTTCCCTTGCAGTGTAGGCA
qPCR-CWMV CP-F	TGCAGATTCGCGGTCTGAAT
qPCR-CWMV CP-R	TCCACACGAGTCTTCTTCGG
qPCR-NbERF109-F	GGTAAATGAGAGGCTGTGGGA
qPCR-NbERF109-R	CCCGAGCCAAAAATACCGGA
qPCR-NbDnaJ1-F	CCATTGGGTGGACACTGAAGA
qPCR-NbDnaJ1-R	ACTTGTGGGGATTGACAAACA
qPCR-NbMKK2-F	TGCAACAGGTCAATTCCCGT
qPCR-NbMKK2-R	GCATTTACACAAAGAGAGGGCA
qPCR-NbRPM1-F	GTTGCCCTTCGGGATTGAGA
qPCR-NbRPM1-R	TGTCCTTTTGTGCATCATCCC
qPCR-NbZHD1-F	AGAAGCTTACCGCCACCTTG
qPCR-NbZHD1-R	AGCACCTTAAACTCACAACCC
Spike-in-F	AGTCGGTGTGAATCCCATCAG
Spike-in-R	AGGTATGACAACCACGGAATG
Cut&Tag-qPCR-ERF109-1-F	TTGTTATTTTAATTATTTTTTATTAAATTGAATATTTCC
Cut&Tag-qPCR-ERF109-1-R	CTTTTGACCA CTCTCTTTCA AATTTTATCC CATTTTCC
Cut&Tag-qPCR-ERF109-2-F	TTGAATAAGTTACTGACTTAATTGATTTGTTTGT
Cut&Tag-qPCR-ERF109-2-R	GCTCTAGGGT TTGGATTTTA GGTTAAATGA GCC
Cut&Tag-qPCR-ERF109-3-F	TTCAAAATAAGATTTTTGGCTCATTTAACCTAAAATCC
Cut&Tag-qPCR-ERF109-3-R	GGTTGAGGCG GACCAATGAG GGAAGCACCT GCAGATCCAC
Cut&Tag-qPCR-ERF109-4-F	GGGTAGCTGGTGGATCTGCAGGT
Cut&Tag-qPCR-ERF109-4-R	CTAGGTTAAT AGGCTTCGCG AATTAT
Cut&Tag-qPCR-DnaJ1-1-F	ATTGTGTACTAAATGACTCAGC
Cut&Tag-qPCR-DnaJ1-1-R	TTTTCTAGCG CTTCGCCTTT TCCC
Cut&Tag-qPCR-DnaJ1-2-F	TCTATTAAAAGGAGAAGAATATACAGTTGACTC
Cut&Tag-qPCR-DnaJ1-2-R	ACAGCAACTC ACTCCACTGA ATTTCTGTCT CC
Cut&Tag-qPCR-DnaJ1-3-F	CCAAATCTTTAAGTTTTTGGAGAC
Cut&Tag-qPCR-DnaJ1-3-R	TCATCAATAC CTTGTATGCT TC
Cut&Tag-qPCR-DnaJ1-4-F	GGGTCAGGATTACACCTTAGT
Cut&Tag-qPCR-DnaJ1-4-R	CACCCTGCAA CAATTCATTC TC
Cut&Tag-qPCR-MKK2-1-F	CAGGTAATTGCTTATTTATAAAAC
Cut&Tag-qPCR-MKK2-1-R	AGCTGTAGAC GGTGAAGACT GAAG
Cut&Tag-qPCR-MKK2-2-F	GGAAATGGTGGTCTAGTGCGGTTAGT
Cut&Tag-qPCR-MKK2-2-R	TGCACTCTAA GATTATGAGA TAGC
Cut&Tag-qPCR-MKK2-3-F	GCTATCAATCATTCATTGATAATGG
Cut&Tag-qPCR-MKK2-3-R	TCTGTGATTG ATTGATTAAC AAATT
Cut&Tag-qPCR-MKK2-4-F	CATTCATAGAGACTTGAAACCTTCG
Cut&Tag-qPCR-MKK2-4-R	CAACTTGTAG GTATACCGAA AGG
Cut&Tag-qPCR-RPM1-1-F	GTTCAGTAGGGAAGCTTGAGAACC
Cut&Tag-qPCR-RPM1-1-R	AAGAACAAAA CTCCCTTCCA TG
Cut&Tag-qPCR-RPM1-2-F	GCCACTTCAAGCACGGTGATTGAAT
Cut&Tag-qPCR-RPM1-2-R	TTAATTTGCT CCATTTTAAA TGAAC
Cut&Tag-qPCR-RPM1-3-F	TAACTTCTTTCAAGCCTTGACCTC
Cut&Tag-qPCR-RPM1-3-R	TCAAATTCTC AATCCCGAAG GGCAAC
Cut&Tag-qPCR-RPM1-4-F	GTGCAACTGTAGATTAATGGAGCAG
Cut&Tag-qPCR-RPM1-4-R	AACTATTAAA AACCTGAGAA AG
Cut&Tag-qPCR-ZHD1-1-F	TTTTTTTGCCTTTATATTCTAGTTGG
Cut&Tag-qPCR-ZHD1-1-R	AACCAAAGTT GATTTCGGTT TTGTC
Cut&Tag-qPCR-ZHD1-2-F	CAAAATATGCGTTTGATAGTGTATGTCTTTTATTTAAG
Cut&Tag-qPCR-ZHD1-2-R	TGATTTTCTT TAGCTAAAAA ATTTCACCAC CTAATCATG
Cut&Tag-qPCR-ZHD1-3-F	AGATTACGCAACATGATTAGGTGG
Cut&Tag-qPCR-ZHD1-3-R	CACCGGCAGG CATAAACTCA CCACA
Cut&Tag-qPCR-ZHD1-4-F	TATCGGCGGCCACGCCGTAGACGG
Cut&Tag-qPCR-ZHD1-4-R	ACATGTCCTC CTGATCTTCA CGGTAG
VIGS-NbERF109-F	CGCGGATCC CAAGACATAACTCTTGTAACTC
VIGS-NbERF109-R	TCCCCCGGG CCTTTGTTGT GAAATCCTTT AGCC
VIGS-NbDnaJ1-F	CGCGGATCC ATGGCCCTTTGAGACCACAAGCTT
VIGS-NbDnaJ1-R	TCCCCCGGG TTACAACAAT TTAGGTTAAA
VIGS-NbMKK2-F	CGCGGATCC ATGCTACATCTATTTCAATG
VIGS-NbMKK2-R	TCCCCCGGG ATCCTTTGGA TCCTTCTGGA CGC
VIGS-NbRPM1-F	CGCGGATCC TTTCATTGTCGGAGAAGTTATTTG
VIGS-NbRPM1-R	TCCCCCGGG ATACCTCTAC TTCCAACTAT AC
VIGS-NbZHD1-F	CGCGGATCC TGTGGTGAGTTTATGCCTGC
VIGS-NbZHD1-R	TCCCCCGGG AATACCTCCG CTATTATTGA GG
